# Supplementary material for: Region- and cell type-specific changes in gene expression in the cerebellum after classical fear conditioning
Source: Research Square preprint supplement (doi:10.21203/rs.3.rs-6469280/v1), 2025-05-07
Supplement: Supplementary file 2 [file 0a528f25953ee6524343fbce.xlsx]

## Sheet: Overview
Table S5
Table S5a: Cell type specific DEGs													Sheet	Name
Column	Description												S5a	Cell type specific DEGs
Gene	gene symbol												S5b	TF analysis
CellType	inhibitory neuron subtype in DCN
LRT_gene	significance for likelihood ratio test (LRT) across conditions
log2FC_CD_vs_HC	log2(fold change) for CD vs HC comparison
p_val_CD_vs_HC	p-value for CD vs HC comparison
p_adj_CD_vs_HC	adjusted p-value using the Benjamini and Hochberg method for CD vs HC comparison
Direction_CD_vs_HC	direction which the gene is differentially expressed in the CD vs HC comparison
log2FC_TN_vs_HC	log2(fold change) for TN vs HC comparison
p_val_TN_vs_HC	p-value for TN vs HC comparison
p_adj_TN_vs_HC	adjusted p-value using the Benjamini and Hochberg method for TN vs HC comparison
Direction_TN_vs_HC	direction which the gene is differentially expressed in the TN vs HC comparison
log2FC_TN_vs_CD	log2(fold change) for TN vs CD comparison
p_val_TN_vs_CD	p-value for TN vs CD comparison
p_adj_TN_vs_CD	adjusted p-value using the Benjamini and Hochberg method for TN vs CD comparison
Direction_TN_vs_CD	direction which the gene is differentially expressed in the TN vs CD comparison
Table S5b: TF analysis
Column	Description
TF	gene symbol of transcription factor
CellType	inhibitory neuron subtype in DCN
avg_RAS	average regulon activity score (RAS) of TF within cell type
RSS_score	regulon specificity score (RSS) of TF within cell type
statistic_CD_vs_HC	test statistic used to compute the p-value for CD vs HC comparison
log2FC_CD_vs_HC	log2(fold change) of RAS median in CD vs HC comparison
wilcox_p_CD_vs_HC	p-value of Wilcoxon's test in CD vs HC comparison
wilcox_padj_CD_vs_HC	adjusted p-value of Wilcoxon's test using the bonferroni method in CD vs HC comparison
statistic_TN_vs_HC	test statistic used to compute the p-value for TN vs HC comparison
log2FC_TN_vs_HC	log2(fold change) of RAS median in TN vs HC comparison
wilcox_p_TN_vs_HC	p-value of Wilcoxon's test in TN vs HC comparison
wilcox_padj_TN_vs_HC	adjusted p-value of Wilcoxon's test using the bonferroni method in TN vs HC comparison
statistic_TN_vs_CD	test statistic used to compute the p-value for TN vs CD comparison
log2FC_TN_vs_CD	log2(fold change) of RAS median in TN vs CD comparison
wilcox_p_TN_vs_CD	p-value of Wilcoxon's test in TN vs CD comparison
wilcox_padj_TN_vs_CD	adjusted p-value of Wilcoxon's test using the bonferroni method in TN vs CD comparison

## Sheet: S5a
Gene	CellType	LRT_gene	log2FC_CD_vs_HC	p_val_CD_vs_HC	p_adj_CD_vs_HC	Direction_CD_vs_HC	log2FC_TN_vs_HC	p_val_TN_vs_HC	p_adj_TN_vs_HC	Direction_TN_vs_HC	log2FC_TN_vs_CD	p_val_TN_vs_CD	p_adj_TN_vs_CD	Direction_TN_vs_CD
1700109K24Rik	Inh_Kit	1	-1.178	0.001572	0.03307	Down	-0.896	0.03235	0.3576	None	0.3849	0.525	0.9999	None
2210408I21Rik	Inh_Kit	1	0.04317	0.1056	0.5614	None	0.4104	0.0004875	0.01856	Up	0.2305	0.2262	0.9999	None
4732471J01Rik	Inh_Kit	1	0.4507	0.0144	0.1738	None	1.212	9.315e-05	0.004825	Up	0.834	0.09565	0.9999	None
4833420G17Rik	Inh_Kit	0	0.8549	0.005462	0.08629	Up	0.5745	0.07421	0.5476	None	-0.3459	0.6343	0.9999	None
4930419G24Rik	Inh_Kit	1	0.4087	0.437	0.9121	None	1.551	0.0001145	0.005788	Up	1.182	0.006348	0.741	None
4930445B16Rik	Inh_Kit	1	1.771	7.714e-06	0.0003543	Up	0.9258	0.06595	0.5197	None	-0.8275	0.05951	0.9999	None
4930517O19Rik	Inh_Kit	0	1.063	0.002581	0.04951	Up	0.58	0.1355	0.6844	None	-0.3771	0.5393	0.9999	None
4930587E11Rik	Inh_Kit	1	-1.25	5.058e-08	4.026e-06	Down	-1.009	4.652e-05	0.002621	Down				None
4933413L06Rik	Inh_Kit	1	-0.8934	0.0002883	0.008488	Down	-0.6316	0.02189	0.2835	None	0.1792	0.6379	0.9999	None
5330434G04Rik	Inh_Kit	1	0.8144	2.579e-08	2.137e-06	Up	0.4291	0.01645	0.2427	None	-0.2951	0.03878	0.9999	None
9530059O14Rik	Inh_Kit	1	1.581	3.882e-05	0.001486	Up	0.6166	0.2003	0.7775	None	-0.9552	0.02833	0.9999	None
9630014M24Rik	Inh_Kit	1	1.021	0.003824	0.06652	Up	0.4195	0.2963	0.8701	None	-0.6267	0.004672	0.6988	None
A230006K03Rik	Inh_Kit	1	2.537	1.857e-08	1.571e-06	Up	1.755	0.0003622	0.0149	Up	-0.7965	0.1959	0.9999	None
A330102I10Rik	Inh_Kit	1	2.334	1.956e-10	2.808e-08	Up	1.307	0.0005936	0.02134	Up	-1.067	0.04457	0.9999	None
AC149090.1	Inh_Kit	1	0.3547	0.5419	0.9495	None	0.9382	0.0001335	0.006627	Up	0.7617	0.0001635	0.2241	None
AY036118	Inh_Kit	1	0.7627	0.0001641	0.005319	Up	0.8076	7.546e-05	0.003983	Up	0.1813	0.8124	0.9999	None
Abat	Inh_Kit	1	-0.6435	0.04051	0.3384	None	-0.4211	0.0007695	0.02577	Down	0.1656	0.178	0.9999	None
Abcc4	Inh_Kit	0	0.771	0.004932	0.08074	Up	0.5273	0.072	0.5395	None	-0.301	0.5849	0.9999	None
Abtb2	Inh_Kit	1	1.081	0.0167	0.1935	None	1.678	0.0001954	0.00926	Up	0.556	0.3848	0.9999	None
Adam12	Inh_Kit	1	-1.158	0.000774	0.01872	Down	-1.018	0.005966	0.1208	None	0.1211	0.8885	0.9999	None
Adamts18	Inh_Kit	1	0.08746	0.5161	0.9391	None	1.317	0.0005988	0.02143	Up	1.314	0.002445	0.6824	None
Adamts2	Inh_Kit	0	-1.149	0.001475	0.03145	Down	-0.6974	0.1455	0.7032	None	0.3741	0.3003	0.9999	None
Adarb2	Inh_Kit	1	-0.428	0.0007081	0.01753	Down	-0.434	9.5e-07	8.705e-05	Down	-0.1364	0.1021	0.9999	None
Adcy9	Inh_Kit	0	0.4877	0.3497	0.8758	None	1.252	0.002139	0.05849	Up	0.7143	0.1781	0.9999	None
Adgrb3	Inh_Kit	1	-0.5467	4.853e-11	8.126e-09	Down	-0.5068	2.465e-09	4.78e-07	Down	-0.002865	0.2956	0.9999	None
Adgrl3	Inh_Kit	1	-1.382	6.561e-10	8.645e-08	Down	-1.183	2.91e-10	7.778e-08	Down	0.07476	0.5341	0.9999	None
Adra1b	Inh_Kit	1	1.082	6.978e-05	0.002428	Up	0.9855	0.000986	0.03162	Up	-0.1545	0.8954	0.9999	None
Agbl4	Inh_Kit	1	1.224	2.465e-06	0.0001295	Up	1.167	0.0006407	0.02235	Up	-0.03812	0.08942	0.9999	None
Agpat4	Inh_Kit	1	1.337	3.305e-05	0.001302	Up	0.8564	0.01246	0.1985	None	-0.4459	0.3132	0.9999	None
Agtpbp1	Inh_Kit	0	-1.094	0.005464	0.08629	Down	-0.5081	0.3488	0.8973	None	0.5527	0.3053	0.9999	None
Ahi1	Inh_Kit	1	0.5268	6.143e-07	3.713e-05	Up	0.2925	0.01123	0.187	None	-0.1635	0.1105	0.9999	None
Ajap1	Inh_Kit	1	-1.005	0.0007274	0.0178	Down	-0.666	0.06311	0.507	None	0.293	0.5231	0.9999	None
Ak5	Inh_Kit	1	2.184	4.207e-08	3.382e-06	Up	1.21	0.004203	0.09549	Up	-0.9606	0.006907	0.7475	None
Akap8l	Inh_Kit	1	0.9402	5.815e-05	0.002106	Up	0.2498	0.07194	0.5395	None	-0.5816	0.005038	0.7023	None
Amer2	Inh_Kit	1	-0.9969	0.002051	0.041	Down	-0.9711	0.003541	0.08461	Down	0.009723	0.775	0.9999	None
Ank1	Inh_Kit	1	0.8951	0.004707	0.07785	Up	1.141	0.01127	0.187	None	0.3446	0.2195	0.9999	None
Ankfn1	Inh_Kit	0	1.064	0.01507	0.1795	None	1.262	0.003675	0.08633	Up	0.06441	0.8266	0.9999	None
Ankrd28	Inh_Kit	0	1.253	0.001935	0.03908	Up	0.5987	0.2132	0.7849	None	-0.528	0.3841	0.9999	None
Anks1b	Inh_Kit	0	-0.2121	0.006409	0.09756	Down	-0.1442	0.1247	0.6689	None	0.07812	0.4172	0.9999	None
Ano4	Inh_Kit	1	1.699	5.988e-05	0.002158	Up	1.842	8.75e-06	0.0006084	Up	0.2027	0.8644	0.9999	None
Ano8	Inh_Kit	0	-0.6477	0.004193	0.07161	Down	-0.1447	0.5484	0.9779	None	0.6005	0.03417	0.9999	None
Apba2	Inh_Kit	0	-0.4317	0.005194	0.08386	Down	-0.4902	0.06587	0.5197	None	-0.05987	0.3831	0.9999	None
Apod	Inh_Kit	1	1.065	0.002091	0.04161	Up	1.167	0.0003627	0.0149	Up	0.189	0.5033	0.9999	None
Apoe	Inh_Kit	1	1.65	2.802e-06	0.0001435	Up	0.03143	0.9618	0.9991	None	-1.571	5.614e-05	0.1154	None
Ar	Inh_Kit	1	-1.019	0.002671	0.0504	Down	-0.8697	0.01205	0.1952	None	0.1152	0.8576	0.9999	None
Arfgef1	Inh_Kit	0	0.09365	0.4687	0.9224	None	0.5243	0.003798	0.08847	Up	0.4003	0.1506	0.9999	None
Arglu1	Inh_Kit	1	-0.8674	0.0003476	0.009838	Down	-0.1527	0.057	0.4895	None	0.6513	0.003672	0.6824	None
Arhgap10	Inh_Kit	1	-1.282	0.0003758	0.01045	Down	-0.9135	0.03109	0.3489	None	0.3572	0.3203	0.9999	None
Arhgap26	Inh_Kit	1	1.224	0.004737	0.07819	Up	1.553	0.001147	0.0357	Up	0.3608	0.416	0.9999	None
Arhgef26	Inh_Kit	1	-1.91	2.088e-10	2.944e-08	Down	-1.79	8.219e-09	1.293e-06	Down	0.09989	0.383	0.9999	None
Arhgef37	Inh_Kit	1	-1.115	0.0007825	0.01878	Down	-1.566	2.411e-05	0.001535	Down	-0.6108	0.2576	0.9999	None
Arl15	Inh_Kit	1	-0.7893	0.001173	0.02576	Down	-0.3958	0.0848	0.5801	None	0.3185	0.4328	0.9999	None
Arl4a	Inh_Kit	1	-1.558	1.719e-07	1.181e-05	Down	-1.124	0.000747	0.02532	Down	0.3376	0.3731	0.9999	None
Arpp21	Inh_Kit	1	0.8108	0.01464	0.1756	None	1.306	0.000294	0.0127	Up	0.6699	0.2062	0.9999	None
Asah2	Inh_Kit	1	1.139	0.0006664	0.01674	Up	1.054	0.003207	0.07977	Up	-0.1079	0.11	0.9999	None
Asic2	Inh_Kit	0	-0.5058	0.001599	0.03339	Down	-0.5421	0.04776	0.445	None	-0.0807	0.75	0.9999	None
Astn2	Inh_Kit	1	-0.6278	1.426e-05	0.0006065	Down	-0.5915	2.326e-05	0.001492	Down	-0.0215	0.8759	0.9999	None
Atad3a	Inh_Kit	0	-0.3085	0.00444	0.07436	Down	-0.06726	0.5426	0.9774	None	0.3217	0.09267	0.9999	None
Atf6	Inh_Kit	0	0.3865	0.006085	0.09397	Up	0.2234	0.1944	0.7736	None	-0.1619	0.3444	0.9999	None
Atf7	Inh_Kit	1	-0.6864	0.07873	0.4816	None	-1.372	0.0004314	0.01673	Down	-0.7343	0.07995	0.9999	None
Atl2	Inh_Kit	0	-0.9259	0.006051	0.09389	Down	-0.8322	0.02029	0.2721	None	0.01405	0.9954	0.9999	None
Atp1b1	Inh_Kit	1	-0.3131	0.1029	0.5549	None	-0.6664	0.001288	0.03906	Down	-0.3245	0.296	0.9999	None
Atp2b1	Inh_Kit	1	-0.5764	0.005313	0.08524	Down	-0.7239	0.0003318	0.01407	Down	-0.1451	0.7492	0.9999	None
Atp5g1	Inh_Kit	1	0.646	0.005883	0.092	Up	-0.09771	0.1019	0.627	None	-0.8592	0.04699	0.9999	None
Atp8a2	Inh_Kit	1	1.408	3.886e-06	0.0001928	Up	0.9218	0.01567	0.2342	None	-0.4263	0.1295	0.9999	None
Atrnl1	Inh_Kit	1	1.135	0.001043	0.02336	Up	1.221	0.0002598	0.01169	Up	0.09506	0.8446	0.9999	None
Atxn2l	Inh_Kit	1	-1.229	0.0007053	0.01753	Down	-0.99	0.01206	0.1952	None	0.2434	0.7494	0.9999	None
Auts2	Inh_Kit	1	-0.6557	1.553e-09	1.836e-07	Down	-0.5223	1.669e-06	0.000142	Down	0.1359	0.5295	0.9999	None
B3galt2	Inh_Kit	1	-0.9967	0.007823	0.1147	None	-1.141	0.00296	0.07549	Down	-0.1674	0.834	0.9999	None
B430010I23Rik	Inh_Kit	1	-1.286	1.289e-05	0.0005542	Down	-0.922	0.003796	0.08847	Down	0.365	0.3682	0.9999	None
Baiap2	Inh_Kit	1	-1.706	3.79e-07	2.409e-05	Down	-1.303	0.0004778	0.01828	Down	0.3793	0.3298	0.9999	None
Baz2b	Inh_Kit	0	0.6054	0.003029	0.05572	Up	0.2381	0.2482	0.827	None	-0.3022	0.335	0.9999	None
Bcas2	Inh_Kit	1	-1.182	0.0007285	0.0178	Down	-0.7296	0.03756	0.3883	None	0.4107	0.2906	0.9999	None
Bclaf1	Inh_Kit	1	-0.233	0.001056	0.02358	Down	-0.1213	0.2712	0.8467	None	0.07851	0.1464	0.9999	None
Bend7	Inh_Kit	0	0.7509	0.002403	0.04677	Up	0.5651	0.03735	0.3878	None	-0.1758	0.5045	0.9999	None
Bmp6	Inh_Kit	1	1.136	0.002288	0.04508	Up	1.455	0.0002512	0.01145	Up	0.4209	0.4133	0.9999	None
Brd9	Inh_Kit	1	-0.5186	0.002217	0.04401	Down	-0.4551	0.01538	0.2308	None	0.07577	0.9377	0.9999	None
Brinp3	Inh_Kit	1	-1.951	2.775e-07	1.858e-05	Down	-1.079	0.0002359	0.01081	Down	0.8977	0.01962	0.9999	None
Btbd11	Inh_Kit	1	-1.062	0.002511	0.04856	Down	-0.1878	0.4679	0.9546	None	0.9336	0.006318	0.741	None
C1qtnf4	Inh_Kit	1	-1.759	5.747e-08	4.528e-06	Down	-1.523	1.851e-05	0.001216	Down	0.1659	0.3896	0.9999	None
Cabp1	Inh_Kit	1	-0.6745	0.0007617	0.0185	Down	-0.5297	0.0243	0.3034	None	0.04887	0.7267	0.9999	None
Cachd1	Inh_Kit	1	1.122	0.0005607	0.01435	Up	0.8135	0.02739	0.3241	None	-0.3316	0.1513	0.9999	None
Cacna1c	Inh_Kit	0	0.5824	0.1959	0.7296	None	1.233	0.003667	0.08633	Up	0.6865	0.2	0.9999	None
Cacna1d	Inh_Kit	1	-1.876	4.512e-15	2.79e-12	Down	-1.886	1.449e-10	4.835e-08	Down	-0.04216	0.1717	0.9999	None
Cacna2d2	Inh_Kit	1	1.597	1.844e-05	0.0007673	Up	1.518	7.957e-05	0.004173	Up	0.01496	0.8187	0.9999	None
Cacnb4	Inh_Kit	1	-1.248	0.001646	0.03418	Down	-0.639	0.1126	0.6441	None	0.5086	0.3806	0.9999	None
Cacng2	Inh_Kit	1	-1.017	0.0003937	0.01077	Down	-1.044	0.00503	0.1084	None	-0.06629	0.165	0.9999	None
Cacng7	Inh_Kit	0	-1.124	0.002991	0.05525	Down	-0.3997	0.2984	0.8731	None	0.7615	0.06242	0.9999	None
Cadm2	Inh_Kit	1	0.4417	1.727e-10	2.524e-08	Up	0.315	1.774e-06	0.0001495	Up	-0.09093	0.3899	0.9999	None
Calm2	Inh_Kit	0	-0.2741	0.005686	0.08927	Down	0.2323	0.114	0.6463	None	0.5706	0.1893	0.9999	None
Caln1	Inh_Kit	0	-0.9334	0.001697	0.03506	Down	-0.3032	0.3405	0.8908	None	0.6181	0.1407	0.9999	None
Camk2b	Inh_Kit	1	0.871	0.006238	0.09568	Up	1.126	0.001171	0.03617	Up	0.2934	0.3187	0.9999	None
Car10	Inh_Kit	1	2.336	4.317e-07	2.711e-05	Up	2	2.079e-05	0.001344	Up	-0.1064	0.9092	0.9999	None
Carmil1	Inh_Kit	1	1.409	0.0001364	0.004549	Up	1.091	0.002032	0.0563	Up	-0.2309	0.7395	0.9999	None
Ccbe1	Inh_Kit	1	1.328	0.0002879	0.008488	Up	0.9755	0.02005	0.2716	None	-0.3134	0.694	0.9999	None
Cdc42	Inh_Kit	1	-0.9608	0.0001844	0.00588	Down	-1.057	0.004363	0.09754	Down	-0.1485	0.05248	0.9999	None
Cdc42bpa	Inh_Kit	1	-0.877	1.893e-05	0.0007801	Down	-1.203	9.645e-07	8.742e-05	Down	-0.4161	0.3718	0.9999	None
Cdh12	Inh_Kit	1	-1.908	7.619e-08	5.619e-06	Down	-1.973	3.789e-08	5.356e-06	Down	-0.06497	0.5014	0.9999	None
Cdh18	Inh_Kit	1	3.365	8.301e-13	2.231e-10	Up	2.027	0.000103	0.005268	Up	-1.127	0.0005237	0.4054	None
Cdh20	Inh_Kit	1	1.53	0.0001902	0.006018	Up	0.8929	0.05902	0.4965	None	-0.6316	0.299	0.9999	None
Cdh22	Inh_Kit	1	2.619	8.152e-12	1.68e-09	Up	2.519	1.868e-10	5.991e-08	Up	0.1158	0.09719	0.9999	None
Cdkal1	Inh_Kit	1	-0.8558	0.004899	0.08036	Down	0.219	0.1251	0.6689	None	1.046	0.02742	0.9999	None
Cdr1os	Inh_Kit	0	0.8737	0.001509	0.03201	Up	0.4544	0.2464	0.8248	None	-0.3611	0.1333	0.9999	None
Cfap299	Inh_Kit	1	0.626	0.01173	0.1508	None	0.7938	0.002283	0.06181	Up	0.1496	0.8771	0.9999	None
Cgnl1	Inh_Kit	0	0.5706	0.004586	0.07615	Up	0.1434	0.317	0.8792	None	-0.4858	0.06325	0.9999	None
Chd5	Inh_Kit	1	1.362	0.0002645	0.007905	Up	0.6547	0.1173	0.6507	None	-0.6962	0.1979	0.9999	None
Chid1	Inh_Kit	0	1.021	0.0009841	0.02247	Up	0.294	0.5403	0.9774	None	-0.768	0.05248	0.9999	None
Chm	Inh_Kit	1	-0.1017	0.4013	0.899	None	-1.043	0.00221	0.06022	Down	-1.051	0.02088	0.9999	None
Chrm2	Inh_Kit	1	2.334	8.669e-07	4.942e-05	Up	1.742	0.0005428	0.02003	Up	-0.5385	0.3223	0.9999	None
Chst9	Inh_Kit	1	-2.346	3.731e-11	6.38e-09	Down	-1.956	2.903e-08	4.247e-06	Down	0.1678	0.3783	0.9999	None
Cit	Inh_Kit	1	0.7613	0.0007184	0.01766	Up	0.4493	0.1862	0.7661	None	-0.2902	0.2435	0.9999	None
Ckb	Inh_Kit	1	-0.5876	0.009124	0.1282	None	-1.055	2.43e-07	2.632e-05	Down	-0.4949	0.07024	0.9999	None
Ckmt1	Inh_Kit	1	0.7409	0.005114	0.08337	Up	-0.1939	0.0867	0.5873	None	-0.81	0.06496	0.9999	None
Clint1	Inh_Kit	0	1.162	0.001923	0.03893	Up	0.2642	0.7279	0.9991	None	-0.9146	0.04129	0.9999	None
Clk1	Inh_Kit	0	0.3425	0.00645	0.098	Up	0.4181	0.07668	0.5562	None	0.1445	0.7401	0.9999	None
Clmp	Inh_Kit	1	-1.193	0.001185	0.02595	Down	-0.943	0.01939	0.2668	None	0.1236	0.8618	0.9999	None
Clstn2	Inh_Kit	1	2.105	7.441e-07	4.272e-05	Up	0.933	0.02308	0.2925	None	-1.192	0.01251	0.9222	None
Clvs2	Inh_Kit	1	1.097	0.001316	0.02851	Up	0.2329	0.3262	0.883	None	-0.9362	0.00323	0.6824	None
Cmss1	Inh_Kit	1	0.5204	0.05444	0.4019	None	0.8141	0.0009842	0.03162	Up	0.3817	0.1661	0.9999	None
Cnksr2	Inh_Kit	1	-1.529	5.394e-07	3.31e-05	Down	-1.602	2.098e-09	4.268e-07	Down	-0.3918	0.1603	0.9999	None
Cnpy1	Inh_Kit	1	-2.831	3.005e-15	2.013e-12	Down	-2.273	8.082e-10	1.822e-07	Down	0.3706	0.5304	0.9999	None
Cnr1	Inh_Kit	1	-1.048	0.003789	0.0662	Down	-0.6856	0.01664	0.2448	None	0.3222	0.6149	0.9999	None
Cntn3	Inh_Kit	1	-2.163	1.903e-11	3.477e-09	Down	-2.103	1.486e-09	3.178e-07	Down	-0.00328	0.5229	0.9999	None
Cntn4	Inh_Kit	1	-0.3388	1.852e-05	0.0007673	Down	-0.2442	0.005113	0.109	None	0.06662	0.5276	0.9999	None
Cntnap2	Inh_Kit	1	1.758	5.134e-13	1.587e-10	Up	1.244	2.997e-06	0.0002357	Up	-0.3187	0.1129	0.9999	None
Cntnap4	Inh_Kit	1	1.924	7.333e-09	6.698e-07	Up	1.398	0.0002015	0.009495	Up	-0.3713	0.08606	0.9999	None
Cntnap5a	Inh_Kit	1	2.491	2.594e-09	2.818e-07	Up	1.711	0.000121	0.006079	Up	-0.7252	0.2491	0.9999	None
Col19a1	Inh_Kit	1	1.345	3.547e-05	0.001371	Up	1.316	0.0003348	0.0141	Up	-0.1488	0.899	0.9999	None
Cplane1	Inh_Kit	1	0.4215	0.0001042	0.003535	Up	0.393	0.007543	0.1433	None	-0.01381	0.661	0.9999	None
Cpsf3	Inh_Kit	1	-0.7144	0.002269	0.04482	Down	0.1589	0.7722	0.9991	None	0.8743	0.00172	0.6621	None
Cpsf7	Inh_Kit	1	-0.5266	0.1274	0.6207	None	-0.7906	0.001785	0.05045	Down	-0.35	0.1512	0.9999	None
Crebzf	Inh_Kit	1	-1.368	3.447e-05	0.001345	Down	-0.9876	0.009695	0.1695	None	0.4442	0.3758	0.9999	None
Cryab	Inh_Kit	0	0.7517	0.001504	0.03198	Up				None	-0.557	0.06934	0.9999	None
Csmd1	Inh_Kit	1	-0.3974	1.505e-06	8.23e-05	Down	-0.4454	1.655e-07	1.917e-05	Down	-0.07779	0.3925	0.9999	None
Csmd2	Inh_Kit	1	1.403	0.0009985	0.02261	Up	0.6525	0.236	0.8121	None	-0.6753	0.09162	0.9999	None
Csmd3	Inh_Kit	1	1.373	1.571e-12	3.827e-10	Up	0.8921	1.796e-05	0.001189	Up	-0.3697	0.05583	0.9999	None
Ctnna2	Inh_Kit	1	0.9225	0.0001554	0.005086	Up	0.6926	0.006392	0.1266	None	-0.1256	0.8697	0.9999	None
Ctnna3	Inh_Kit	1	3.484	1.971e-15	1.44e-12	Up	2.77	4.037e-09	7.103e-07	Up	-0.4465	0.3312	0.9999	None
Ctr9	Inh_Kit	0	0.5917	0.08682	0.5088	None	0.8999	0.002872	0.07347	Up	0.2788	0.4813	0.9999	None
Cyld	Inh_Kit	1	-0.9425	0.003423	0.06125	Down	-0.787	0.01046	0.1792	None	0.09529	0.9533	0.9999	None
Dab1	Inh_Kit	1	-1.382	3.402e-07	2.223e-05	Down	-0.695	0.01131	0.187	None	0.7228	0.02424	0.9999	None
Dab2ip	Inh_Kit	1	-0.6577	0.04925	0.3794	None	-1.367	3.447e-05	0.002024	Down	-0.8157	0.04241	0.9999	None
Dach1	Inh_Kit	1	-1.574	1.048e-05	0.0004604	Down	-1.893	3.876e-08	5.386e-06	Down	-0.4599	0.3653	0.9999	None
Dag1	Inh_Kit	0	-0.955	0.002997	0.05525	Down	-0.7102	0.05396	0.4764	None	0.2903	0.5363	0.9999	None
Dancr	Inh_Kit	0	-0.6386	0.03725	0.3224	None	-0.8489	0.003254	0.08051	Down	-0.2135	0.6593	0.9999	None
Dapk1	Inh_Kit	1	-0.958	3.364e-05	0.001319	Down	-0.1979	0.3649	0.9064	None	0.7429	0.002948	0.6824	None
Dctn1	Inh_Kit	0	1.266	0.003419	0.06125	Up	0.6089	0.1379	0.6886	None	-0.6995	0.1274	0.9999	None
Ddo	Inh_Kit	1	1.365	0.0007908	0.01886	Up	0.7627	0.1426	0.6986	None	-0.6768	0.1634	0.9999	None
Ddx5	Inh_Kit	1	-0.8876	0.003168	0.05801	Down	-0.8052	0.005463	0.1142	None	-0.02022	0.6732	0.9999	None
Dennd5a	Inh_Kit	0	0.2312	0.1893	0.7214	None	0.8237	0.003316	0.08182	Up	0.6311	0.2138	0.9999	None
Dgkb	Inh_Kit	1	-0.6689	0.03361	0.3018	None	-1.525	6.611e-05	0.003557	Down	-1.041	0.02795	0.9999	None
Dgkg	Inh_Kit	1	1.199	9.43e-06	0.0004211	Up	0.4492	0.1899	0.768	None	-0.8556	0.03603	0.9999	None
Dgkh	Inh_Kit	0	-0.6657	0.1382	0.6416	None	-1.241	0.002044	0.05645	Down	-0.51	0.377	0.9999	None
Dgki	Inh_Kit	1	-0.6685	0.001661	0.03441	Down	-0.425	0.02557	0.3108	None	0.1206	0.8572	0.9999	None
Dgkz	Inh_Kit	1	-1.195	0.0003455	0.009838	Down	-0.4075	0.06808	0.5262	None	0.7982	0.09339	0.9999	None
Disp3	Inh_Kit	1	-0.9953	3.808e-05	0.001464	Down	-0.6985	0.01462	0.2225	None				None
Dlg2	Inh_Kit	1	-0.7261	5.391e-06	0.0002564	Down	-0.934	3.249e-08	4.671e-06	Down	-0.3572	0.072	0.9999	None
Dlgap1	Inh_Kit	1	-1.005	6.442e-12	1.363e-09	Down	-0.9556	4.741e-12	3.594e-09	Down	-0.1055	0.8222	0.9999	None
Dlgap2	Inh_Kit	1	1.735	1.069e-11	2.147e-09	Up	0.7688	0.003861	0.08944	Up	-1.049	0.003863	0.6824	None
Dlgap3	Inh_Kit	1	0.02099	0.7736	0.9887	None	0.9893	0.002296	0.0619	Up	0.9776	0.012	0.9222	None
Dmd	Inh_Kit	1	-1.988	6.512e-08	4.938e-06	Down	-2.214	3.991e-09	7.103e-07	Down	-0.2221	0.8198	0.9999	None
Dnah11	Inh_Kit	0	-1.027	0.004303	0.07298	Down	-0.7504	0.08949	0.5951	None	0.2304	0.5918	0.9999	None
Dnajc1	Inh_Kit	1	-1.201	0.001634	0.03403	Down	-1.38	0.0006441	0.02238	Down	-0.2328	0.4939	0.9999	None
Dnajc6	Inh_Kit	0	0.5002	0.004406	0.07409	Up	0.0006911	0.4897	0.9605	None	-0.3925	0.1654	0.9999	None
Dnajc7	Inh_Kit	0	1.168	0.001966	0.03942	Up	0.7967	0.05426	0.4776	None	-0.4434	0.4823	0.9999	None
Dnm1	Inh_Kit	0	-0.9818	0.006613	0.09944	Down	-0.00116	0.6657	0.9963	None	1.046	0.02202	0.9999	None
Dock10	Inh_Kit	1	1.444	2.118e-05	0.0008687	Up	0.9562	0.007643	0.1442	None	-0.4141	0.1073	0.9999	None
Dock9	Inh_Kit	1	1.276	0.001133	0.02494	Up	1.231	0.001367	0.04072	Up	0.1116	0.822	0.9999	None
Dop1b	Inh_Kit	1	0.9043	0.0214	0.2264	None	1.519	2.644e-05	0.001633	Up	0.6032	0.1831	0.9999	None
Dpm1	Inh_Kit	1	0.907	0.00147	0.03142	Up	-0.03329	0.4495	0.9474	None	-0.9312	0.04003	0.9999	None
Dpp10	Inh_Kit	0	-0.4572	0.07528	0.4713	None	-0.774	0.0003683	0.01491	Down				None
Dpp3	Inh_Kit	0	-0.629	0.001853	0.03785	Down	-0.3245	0.2273	0.7993	None				None
Dpp6	Inh_Kit	1	0.4379	2.745e-06	0.0001414	Up	0.4505	3.073e-06	0.0002395	Up	0.05073	0.06984	0.9999	None
Dtx3	Inh_Kit	1	-0.5372	0.04974	0.3819	None	-1.094	0.004016	0.09225	Down	-0.5318	0.03153	0.9999	None
Dusp10	Inh_Kit	1	-0.846	0.02607	0.2587	None	-1.312	0.0008701	0.02839	Down	-0.4033	0.4786	0.9999	None
Dusp15	Inh_Kit	1	-0.8124	0.04019	0.3369	None	-1.552	7.189e-06	0.0005213	Down	-0.9334	0.04186	0.9999	None
E130114P18Rik	Inh_Kit	1	-1.501	3.496e-07	2.266e-05	Down	-1.322	1.94e-05	0.001264	Down	0.1309	0.8321	0.9999	None
Efna5	Inh_Kit	1	-1.858	5.233e-09	5.13e-07	Down	-1.648	1.33e-06	0.0001192	Down	0.1378	0.3588	0.9999	None
Efr3a	Inh_Kit	1	-1.223	0.00137	0.02953	Down	-1.128	0.006382	0.1266	None	0.07231	0.2153	0.9999	None
Eif4g3	Inh_Kit	1	-0.8475	0.002387	0.04668	Down	-0.8446	0.01114	0.1869	None	-0.08696	0.2067	0.9999	None
Elavl2	Inh_Kit	1	1.539	5.755e-05	0.002093	Up	0.8284	0.009602	0.1687	None	-0.7898	0.2042	0.9999	None
Eml5	Inh_Kit	1	-0.7415	3.465e-09	3.483e-07	Down	-0.5665	7.884e-07	7.556e-05	Down	0.05368	0.9297	0.9999	None
Enah	Inh_Kit	0	0.7879	0.005175	0.08386	Up	0.1141	0.5736	0.9836	None	-0.5612	0.1512	0.9999	None
Enox1	Inh_Kit	1	-0.5132	0.1309	0.6257	None	-0.7268	0.0004958	0.0187	Down	-0.2779	0.00585	0.7403	None
Epb41l3	Inh_Kit	1	-0.8195	0.0002523	0.007653	Down	-0.3145	0.1093	0.638	None	0.3496	0.2561	0.9999	None
Epha5	Inh_Kit	1	1.935	5.158e-07	3.189e-05	Up	0.4608	0.3934	0.9217	None	-1.473	0.0007204	0.4232	None
Epha6	Inh_Kit	1	1.185	7.241e-07	4.187e-05	Up	0.09846	0.8291	0.9991	None	-1.201	2.581e-05	0.07075	Down
Epha7	Inh_Kit	0	-0.6542	0.005195	0.08386	Down	-0.3545	0.2069	0.7809	None	0.363	0.2571	0.9999	None
Ephb1	Inh_Kit	1	2.275	2.145e-09	2.438e-07	Up	2.389	5.082e-09	8.648e-07	Up	0.2942	0.1801	0.9999	None
Erc2	Inh_Kit	1	-0.5828	0.0001182	0.003991	Down	-0.4629	0.0002285	0.01053	Down	0.01545	0.9025	0.9999	None
Etl4	Inh_Kit	1	-0.2456	0.2718	0.8053	None	-0.4907	0.001713	0.04927	Down	-0.3191	0.05451	0.9999	None
Fat1	Inh_Kit	0	-0.3751	0.0659	0.4416	None	-0.7073	0.003626	0.08605	Down	-0.2927	0.4033	0.9999	None
Fbxo44	Inh_Kit	0	-1.04	0.001893	0.03852	Down	-0.7391	0.05899	0.4965	None	0.3275	0.5767	0.9999	None
Fgf13	Inh_Kit	1	-2.191	3.288e-09	3.432e-07	Down	-2.215	3.063e-09	5.804e-07	Down	-0.1037	0.8412	0.9999	None
Fgf5	Inh_Kit	1	0.4067	0.126	0.6176	None	0.9787	0.002111	0.0579	Up	0.4953	0.1168	0.9999	None
Fgfr1op	Inh_Kit	1	1.215	0.000555	0.01425	Up	1.406	2.58e-05	0.001618	Up	0.1157	0.6978	0.9999	None
Focad	Inh_Kit	1	0.9194	0.0005279	0.0137	Up	0.5139	0.001576	0.04629	Up	-0.2863	0.7016	0.9999	None
Foxo1	Inh_Kit	0	-0.596	0.004278	0.0727	Down	-0.4373	0.06684	0.5214	None				None
Frmd3	Inh_Kit	1	-1.57	7.037e-07	4.129e-05	Down	-1.574	3.559e-07	3.619e-05	Down	-0.09596	0.9224	0.9999	None
Frmd4a	Inh_Kit	1	-0.4053	6.308e-08	4.871e-06	Down	-0.2647	0.00107	0.03366	Down	0.1012	0.02631	0.9999	None
Frmd5	Inh_Kit	1	0.37	0.006255	0.09577	Up	0.3839	0.0003192	0.01365	Up	0.06049	0.1556	0.9999	None
Frmpd4	Inh_Kit	1	-1.772	4.844e-14	2.29e-11	Down	-1.487	8.053e-09	1.291e-06	Down	0.1255	0.453	0.9999	None
Gab2	Inh_Kit	1	-1.198	0.0008414	0.01983	Down	-1.102	0.004984	0.1077	None	-0.0001173	0.7235	0.9999	None
Galnt13	Inh_Kit	1	-1.618	2.211e-05	0.0008976	Down	-2.042	6.249e-08	8.143e-06	Down	-0.5032	0.35	0.9999	None
Galnt14	Inh_Kit	1	1.646	8.959e-06	0.0004046	Up	1.229	0.001262	0.03855	Up	-0.4115	0.3812	0.9999	None
Galnt17	Inh_Kit	1	-1.228	6.427e-13	1.913e-10	Down	-0.7452	1.056e-05	0.00071	Down	0.3923	0.04549	0.9999	None
Galnt18	Inh_Kit	1	-2.76	3.52e-14	1.768e-11	Down	-2.501	6.399e-11	2.425e-08	Down	0.1394	0.8893	0.9999	None
Galntl6	Inh_Kit	1	2.029	1.746e-05	0.000731	Up	1.571	0.002309	0.06191	Up	-0.3475	0.745	0.9999	None
Garnl3	Inh_Kit	1	2.359	3.503e-08	2.874e-06	Up	2.337	8.992e-08	1.154e-05	Up	0.09085	0.7441	0.9999	None
Gdpd5	Inh_Kit	1	-1.358	8.259e-05	0.002837	Down	-1.091	0.004165	0.0949	Down	0.1412	0.8621	0.9999	None
Gfra2	Inh_Kit	1	0.9436	0.00378	0.0662	Up	0.9365	0.004048	0.09275	Up	0.06166	0.845	0.9999	None
Gldc	Inh_Kit	1	-1.207	0.0002965	0.008699	Down	-1.014	0.01475	0.2236	None	0.1265	0.3295	0.9999	None
Gm1043	Inh_Kit	0	0.859	0.001901	0.03859	Up	0.3574	0.3322	0.8848	None	-0.5789	0.06818	0.9999	None
Gm11417	Inh_Kit	1	-1.849	1.198e-08	1.082e-06	Down	-1.896	1.762e-08	2.672e-06	Down	-0.0913	0.861	0.9999	None
Gm11418	Inh_Kit	1	0.7773	0.0003497	0.009864	Up	0.7261	0.0009037	0.02923	Up	0.01811	0.95	0.9999	None
Gm11817	Inh_Kit	1	-1.274	0.0003418	0.009814	Down	-0.4356	0.1431	0.7003	None	0.9536	0.01764	0.9999	None
Gm12296	Inh_Kit	1	-1.782	9.698e-08	7.023e-06	Down	-1.751	2.29e-07	2.546e-05	Down	-0.02898	0.982	0.9999	None
Gm12353	Inh_Kit	0	-0.6352	0.08199	0.4922	None	-0.7274	0.00182	0.05092	Down	0.0173	0.2737	0.9999	None
Gm13629	Inh_Kit	1	0.9215	4.527e-06	0.0002205	Up	0.514	0.007074	0.1362	None	-0.3031	0.1805	0.9999	None
Gm14342	Inh_Kit	1	1.829	4.647e-06	0.000225	Up	1.955	1.695e-05	0.001131	Up	0.1655	0.37	0.9999	None
Gm14344	Inh_Kit	1	1.167	7.083e-05	0.002454	Up	1.688	1.331e-07	1.609e-05	Up	0.4655	0.4216	0.9999	None
Gm15283	Inh_Kit	1	-0.8595	0.03307	0.2996	None	-1.244	0.0007104	0.02428	Down	-0.4144	0.4248	0.9999	None
Gm15398	Inh_Kit	1	0.7948	0.00079	0.01886	Up	0.1067	0.7426	0.9991	None	-0.7787	0.01416	0.9999	None
Gm15594	Inh_Kit	1	-1.286	3.907e-05	0.001488	Down	-0.5106	0.2645	0.8402	None	0.7387	0.03256	0.9999	None
Gm1604a	Inh_Kit	0	0.9751	0.004188	0.07161	Up	0.6389	0.1009	0.6248	None	-0.3256	0.6576	0.9999	None
Gm16054	Inh_Kit	1	-0.9335	0.0002759	0.008214	Down	-0.7273	0.007923	0.1491	None				None
Gm16093	Inh_Kit	0	0.3388	0.1661	0.6884	None	1.074	0.002991	0.07604	Up	0.7682	0.04582	0.9999	None
Gm17106	Inh_Kit	1	1.12	0.00515	0.0838	Up	0.2821	0.1829	0.7627	None	-0.7709	0.03441	0.9999	None
Gm1992	Inh_Kit	1	-1.824	1.351e-08	1.174e-06	Down	-1.811	9.296e-07	8.613e-05	Down	-0.1006	0.3551	0.9999	None
Gm19938	Inh_Kit	1	-1.366	5.006e-07	3.119e-05	Down	-0.9865	0.0008714	0.02839	Down	0.3141	0.3002	0.9999	None
Gm20642	Inh_Kit	0	0.5277	0.2118	0.7483	None	1.049	0.003332	0.08197	Up	0.6578	0.2149	0.9999	None
Gm26688	Inh_Kit	1	-1.088	0.0005786	0.01477	Down	-0.8593	0.002825	0.07293	Down	0.1682	0.6997	0.9999	None
Gm28376	Inh_Kit	1	-1.343	0.0005239	0.01367	Down	-0.5014	0.3856	0.9155	None	0.9493	0.03491	0.9999	None
Gm28410	Inh_Kit	0	-0.4096	0.3017	0.8384	None	-0.7777	0.003632	0.08605	Down	-0.3664	0.1493	0.9999	None
Gm29514	Inh_Kit	1	-1.394	9.198e-06	0.0004131	Down	-0.8163	0.03241	0.3576	None	0.5833	0.1392	0.9999	None
Gm29530	Inh_Kit	1	1.039	0.0001648	0.005321	Up	1.081	0.0003823	0.0154	Up	0.04699	0.462	0.9999	None
Gm41231	Inh_Kit	1	0.9271	0.0003467	0.009838	Up	0.4835	0.1239	0.6671	None	-0.4189	0.2723	0.9999	None
Gm42439	Inh_Kit	1	-1.565	3.222e-05	0.001276	Down	-1.7	5.93e-06	0.0004426	Down	-0.2382	0.7787	0.9999	None
Gm44071	Inh_Kit	1	-1.444	6.925e-07	4.093e-05	Down	-1.134	0.0003675	0.01491	Down	0.2811	0.5364	0.9999	None
Gm45645	Inh_Kit	0	-0.7629	0.005461	0.08629	Down	-0.5083	0.09125	0.6025	None	0.2331	0.6189	0.9999	None
Gm45904	Inh_Kit	1	1.192	9.564e-05	0.003271	Up	0.9339	0.00552	0.1145	None	-0.199	0.7153	0.9999	None
Gm47283	Inh_Kit	1	-0.3705	0.4618	0.9173	None	1.32	2.83e-06	0.0002269	Up	1.712	3.325e-06	0.02735	Up
Gm47352	Inh_Kit	0	-1.02	0.005165	0.08386	Down	-0.7559	0.05038	0.4582	None	0.2205	0.8009	0.9999	None
Gm47423	Inh_Kit	0	-0.4898	0.2561	0.7934	None	-0.9704	0.001805	0.05067	Down	-0.4108	0.2627	0.9999	None
Gm47710	Inh_Kit	0	-0.3573	0.4295	0.9089	None	-1.115	0.003066	0.07747	Down	-0.7453	0.04607	0.9999	None
Gm48091	Inh_Kit	1	1.545	4.38e-05	0.001638	Up	0.7064	0.09249	0.6068	None	-0.7476	0.06787	0.9999	None
Gm48321	Inh_Kit	1	1.318	0.0002314	0.007154	Up	0.8903	0.02372	0.2982	None	-0.4504	0.422	0.9999	None
Gm48747	Inh_Kit	1	-1.623	1.857e-06	9.948e-05	Down	-1.588	3.314e-05	0.001974	Down	0.1344	0.5634	0.9999	None
Gm6209	Inh_Kit	1	0.8221	4.615e-05	0.001717	Up	0.3952	0.06154	0.5032	None	-0.537	0.02463	0.9999	None
Gm9801	Inh_Kit	0	0.7672	0.004632	0.07677	Up	0.5643	0.06141	0.5032	None	-0.1948	0.8089	0.9999	None
Gm9866	Inh_Kit	1	0.6282	0.002896	0.05404	Up	0.8737	0.0004567	0.01763	Up	0.3439	0.5233	0.9999	None
Gnptg	Inh_Kit	1	-0.9354	0.0102	0.1373	None	-1.401	3.88e-05	0.002231	Down	-0.5127	0.2389	0.9999	None
Gpr158	Inh_Kit	1	-0.8683	1.333e-05	0.00057	Down	-1.031	2.677e-08	3.986e-06	Down	-0.1914	0.3193	0.9999	None
Gpr162	Inh_Kit	1	-1.342	4.664e-05	0.00172	Down	-0.6959	0.06749	0.5235	None	0.6816	0.09731	0.9999	None
Gprin3	Inh_Kit	1	2.373	3.467e-09	3.483e-07	Up	1.995	2.568e-06	0.0002099	Up	-0.2687	0.7281	0.9999	None
Gramd1b	Inh_Kit	1	-1.355	0.0003919	0.01075	Down	-0.6088	0.1659	0.7389	None	0.67	0.2181	0.9999	None
Gria3	Inh_Kit	1	-0.8895	1.633e-12	3.859e-10	Down	-0.8907	4.058e-11	1.88e-08	Down	-0.07076	0.546	0.9999	None
Gria4	Inh_Kit	1	-0.3846	2.661e-06	0.0001389	Down	-0.3205	0.0001793	0.008595	Down	0.03916	0.6265	0.9999	None
Grid1	Inh_Kit	1	-0.2082	0.0002556	0.007724	Down	-0.4071	0.01356	0.211	None	-0.2613	0.227	0.9999	None
Grid2	Inh_Kit	1	-0.9883	3.687e-13	1.185e-10	Down	-1.079	1.58e-11	8.237e-09	Down	-0.1639	0.03588	0.9999	None
Grik2	Inh_Kit	1	1.588	0.0002117	0.006596	Up	1.331	0.001048	0.03322	Up	-0.09596	0.7721	0.9999	None
Grik4	Inh_Kit	1	2.335	1.611e-08	1.378e-06	Up	2.178	2.672e-07	2.857e-05	Up	-0.04355	0.2993	0.9999	None
Grin2a	Inh_Kit	1	1.052	0.01894	0.2092	None	1.656	0.000136	0.006709	Up	0.6702	0.2694	0.9999	None
Grin2b	Inh_Kit	1	1.399	4.23e-06	0.0002086	Up	1.676	7.705e-09	1.26e-06	Up	0.3998	0.2688	0.9999	None
Grip1	Inh_Kit	1	2.484	5.557e-09	5.382e-07	Up	2.048	6.61e-06	0.0004835	Up	-0.3054	0.6971	0.9999	None
Grk3	Inh_Kit	1	-1.389	6.482e-05	0.002275	Down	-0.8856	0.03173	0.3533	None	0.3983	0.2585	0.9999	None
Grm1	Inh_Kit	1	-0.5773	4.982e-09	4.944e-07	Down	-0.6953	4.425e-08	5.963e-06	Down	-0.1483	0.5532	0.9999	None
Grm3	Inh_Kit	1	-1.72	5.652e-06	0.0002673	Down	-1.323	5.474e-05	0.003023	Down	0.2279	0.3978	0.9999	None
Grm5	Inh_Kit	1	4.143	8.065e-22	3.241e-18	Up	3.61	2.658e-16	7.387e-13	Up	-0.2296	0.6619	0.9999	None
Grm7	Inh_Kit	1	-0.7258	0.01169	0.1506	None	-1.06	3.276e-05	0.001965	Down				None
Grm8	Inh_Kit	1	-2.297	7.425e-10	9.626e-08	Down	-2.295	1.767e-09	3.684e-07	Down	-0.05573	0.9807	0.9999	None
Hcn1	Inh_Kit	1	-0.62	2.466e-11	4.31e-09	Down	-0.6053	6.064e-11	2.408e-08	Down	-0.02696	0.3866	0.9999	None
Hcrtr2	Inh_Kit	1	1.474	0.0001338	0.004482	Up	0.9719	0.02716	0.3228	None	-0.4617	0.513	0.9999	None
Hdgfl2	Inh_Kit	1	0.8134	0.001108	0.02453	Up	0.5242	0.04987	0.455	None	-0.317	0.3255	0.9999	None
Hhat	Inh_Kit	1	0.6174	0.003441	0.06132	Up	0.6739	0.001546	0.04555	Up	0.05377	0.9055	0.9999	None
Hipk2	Inh_Kit	0	-0.6164	0.006103	0.09397	Down	-0.2447	0.3783	0.912	None	0.4075	0.1942	0.9999	None
Homer2	Inh_Kit	1	1.597	1.512e-05	0.0006365	Up	1.366	0.0008295	0.02748	Up	-0.2395	0.6959	0.9999	None
Homer3	Inh_Kit	1	-0.8168	0.002543	0.04901	Down	-0.8134	0.003473	0.08345	Down	-0.02301	0.9874	0.9999	None
Hsp90b1	Inh_Kit	1	-1.029	0.01161	0.15	None	-1.524	4.299e-06	0.0003319	Down	-0.5706	0.03376	0.9999	None
Hspa5	Inh_Kit	1	-0.09747	0.9172	0.9981	None	-1.011	0.001733	0.04966	Down	-0.9151	0.009717	0.8548	None
Htr4	Inh_Kit	1	0.9888	0.0001889	0.006	Up	1.031	0.0007626	0.02575	Up	-0.0384	0.7649	0.9999	None
Htt	Inh_Kit	0	-0.8674	0.006101	0.09397	Down	-0.2794	0.5332	0.9756	None	0.5572	0.1893	0.9999	None
Hunk	Inh_Kit	1	-1.697	9.187e-07	5.2e-05	Down	-1.16	0.003464	0.08345	Down	0.4356	0.1017	0.9999	None
Ica1	Inh_Kit	0	0.8362	0.006571	0.09916	Up	0.005582	0.4596	0.9509	None	-0.726	0.0928	0.9999	None
Igsf8	Inh_Kit	0	-0.761	0.004217	0.07181	Down	-0.3483	0.3792	0.912	None	0.3906	0.2491	0.9999	None
Il1rapl1	Inh_Kit	1	-1.097	3.656e-06	0.0001836	Down	-1.339	2.073e-07	2.336e-05	Down	-0.3655	0.5661	0.9999	None
Immp2l	Inh_Kit	1	0.08007	0.1456	0.6588	None	-0.6781	0.003426	0.08305	Down	-0.8127	0.0002742	0.3221	None
Inpp4b	Inh_Kit	1	-0.3553	1.068e-07	7.595e-06	Down	-0.2166	5.77e-05	0.003165	Down	0.1204	0.2695	0.9999	None
Inpp5a	Inh_Kit	0	-0.9191	0.004777	0.07869	Down	-0.5947	0.1678	0.7437	None	0.3263	0.4771	0.9999	None
Iqch	Inh_Kit	0	0.6358	0.004353	0.07336	Up	0.5508	0.01903	0.2645	None	-0.1313	0.6084	0.9999	None
Iqsec1	Inh_Kit	1	-2.404	3.507e-12	7.831e-10	Down	-1.737	9.634e-08	1.217e-05	Down	0.5108	0.4449	0.9999	None
Itga8	Inh_Kit	0	0.3598	0.5448	0.9502	None	1.172	0.003137	0.07855	Up	0.6851	0.1788	0.9999	None
Itpr1	Inh_Kit	1	-1.582	1.752e-06	9.45e-05	Down	-1.198	0.0003374	0.01414	Down	0.3866	0.2934	0.9999	None
Ivd	Inh_Kit	0	-0.4999	0.2867	0.8233	None	-1.143	0.001353	0.04043	Down	-0.5602	0.1788	0.9999	None
Kcna1	Inh_Kit	1	-0.1374	0.8355	0.9919	None	-0.9194	0.0001896	0.009036	Down	-0.798	0.006593	0.741	None
Kcna2	Inh_Kit	1	-1.904	5.802e-08	4.528e-06	Down	-1.664	8.188e-06	0.0005786	Down	0.1819	0.5494	0.9999	None
Kcnb2	Inh_Kit	1	2.525	7.493e-08	5.577e-06	Up	1.803	6.247e-06	0.000461	Up	-0.5043	0.03174	0.9999	None
Kcnc1	Inh_Kit	1	1.626	8.035e-06	0.000367	Up	1.228	0.0006315	0.02225	Up	-0.2244	0.7996	0.9999	None
Kcnc2	Inh_Kit	1	1.924	1.816e-09	2.115e-07	Up	1.168	0.000793	0.02645	Up	-0.9716	0.01947	0.9999	None
Kcnd2	Inh_Kit	1	2.617	1.027e-14	5.502e-12	Up	2.221	2.112e-10	6.524e-08	Up	-0.1672	0.5725	0.9999	None
Kcnd3	Inh_Kit	1	-0.4842	0.001004	0.02268	Down	0.2577	0.3742	0.912	None	0.7944	0.01008	0.8548	None
Kcnh1	Inh_Kit	1	1.317	6.093e-05	0.002186	Up	1.524	5.41e-05	0.003008	Up	0.1144	0.1282	0.9999	None
Kcnip4	Inh_Kit	1	-1.107	7.377e-06	0.0003448	Down	-1.927	4.434e-08	5.963e-06	Down	-0.9778	0.02275	0.9999	None
Kcnk1	Inh_Kit	1	-0.7836	0.006092	0.09397	Down	-1.137	0.003485	0.0835	Down	-0.3086	0.1667	0.9999	None
Kcnk3	Inh_Kit	0	0.5842	0.006513	0.09859	Up	0.6136	0.006782	0.1318	None	-0.0455	0.8839	0.9999	None
Kcnma1	Inh_Kit	1	-0.8739	2.843e-13	9.937e-11	Down	-0.9059	1.42e-13	1.691e-10	Down	-0.1403	0.5429	0.9999	None
Kcnmb2	Inh_Kit	1	2.083	6.846e-08	5.143e-06	Up	0.7233	0.1158	0.648	None	-1.324	0.004037	0.6824	None
Kcnn3	Inh_Kit	1	0.9059	0.004434	0.07436	Up	1.108	0.003104	0.07796	Up	0.092	0.2157	0.9999	None
Kcnq1ot1	Inh_Kit	1	-0.1522	0.3696	0.8851	None	-0.448	0.001251	0.03836	Down	-0.3389	0.02696	0.9999	None
Kcnq3	Inh_Kit	1	-1.882	3.665e-08	2.976e-06	Down	-1.697	2.604e-05	0.00162	Down	0.07647	0.1526	0.9999	None
Kcnq5	Inh_Kit	1	2.131	1.354e-06	7.495e-05	Up	2.342	4.153e-07	4.132e-05	Up	0.2165	0.1819	0.9999	None
Kctd8	Inh_Kit	1	-1.888	4.996e-10	6.693e-08	Down	-1.133	4.412e-06	0.0003375	Down	0.6066	0.1026	0.9999	None
Kif1b	Inh_Kit	0	0.1816	0.003893	0.06744	Up	0.07626	0.2459	0.8247	None	-0.04563	0.6119	0.9999	None
Kif26b	Inh_Kit	1	1.096	0.0009174	0.02131	Up	0.837	0.01733	0.2511	None	-0.168	0.865	0.9999	None
Kirrel3	Inh_Kit	1	-2.822	6.88e-20	1.106e-16	Down	-1.896	2.661e-13	2.774e-10	Down	0.896	0.09846	0.9999	None
Kit	Inh_Kit	0	-0.7413	0.001716	0.03538	Down	-0.3933	0.1015	0.626	None	0.2525	0.1923	0.9999	None
Klf12	Inh_Kit	1	0.4758	0.000103	0.003508	Up	0.3235	0.08065	0.5656	None	-0.1618	0.1376	0.9999	None
Klhdc10	Inh_Kit	1	0.6952	0.0007754	0.01872	Up	0.008977	0.9998	1	None	-0.6062	0.005245	0.719	None
Klhdc2	Inh_Kit	0	1.099	0.001341	0.02898	Up	0.5015	0.1716	0.7477	None	-0.5899	0.2415	0.9999	None
Klhl1	Inh_Kit	1	3.905	5.075e-17	5.099e-14	Up	3.166	1.326e-11	7.372e-09	Up	-0.5667	0.2131	0.9999	None
Klhl5	Inh_Kit	1	0.7432	0.00325	0.05936	Up	0.8323	0.002301	0.0619	Up	0.08877	0.287	0.9999	None
Ksr2	Inh_Kit	1	0.8065	0.005334	0.08533	Up	0.2238	0.01225	0.1968	None	-0.367	0.1757	0.9999	None
Ktn1	Inh_Kit	0	-0.4414	0.2233	0.7647	None	-0.1793	0.003769	0.08828	Down	0.2015	0.104	0.9999	None
L3mbtl4	Inh_Kit	1	-1.154	2.7e-06	0.00014	Down	-0.7829	0.006361	0.1266	None				None
Lama1	Inh_Kit	1	0.8899	0.005228	0.08409	Up	0.9803	0.002853	0.07319	Up	0.05537	0.5866	0.9999	None
Lamb1	Inh_Kit	1	-1.032	0.0005233	0.01367	Down	-1.19	0.0001637	0.007889	Down	-0.1601	0.7619	0.9999	None
Lhfp	Inh_Kit	1	-1.568	6.268e-05	0.002229	Down	-1.112	0.004608	0.1019	None	0.41	0.4429	0.9999	None
Lifr	Inh_Kit	1	1.313	0.0009725	0.02233	Up	1.476	0.0002251	0.01043	Up	0.1729	0.8531	0.9999	None
Lima1	Inh_Kit	1	-1.265	0.0002584	0.007778	Down	-1.39	7.422e-05	0.003942	Down	-0.158	0.7363	0.9999	None
Lin28b	Inh_Kit	0	0.5911	0.006172	0.09486	Up	-0.06123	0.939	0.9991	None	-0.7225	0.00384	0.6824	None
Lingo2	Inh_Kit	1	-0.04208	0.6426	0.9732	None	-1.341	8.765e-06	0.0006084	Down	-1.368	0.0001257	0.2067	None
Lmo4	Inh_Kit	1	1.464	0.0003643	0.0102	Up	1.153	0.009686	0.1695	None	-0.4051	0.6219	0.9999	None
Lnx2	Inh_Kit	1	-0.7339	0.0005863	0.01491	Down	-0.5879	0.005906	0.1198	None				None
Lpcat2	Inh_Kit	1	0.8635	1.093e-06	6.146e-05	Up				None	-0.5239	0.05132	0.9999	None
Lrp1b	Inh_Kit	1	-0.9743	9.992e-06	0.0004413	Down	-1.32	3.559e-11	1.746e-08	Down	-0.4981	0.01123	0.8887	None
Lrrc4c	Inh_Kit	1	0.8113	5.695e-15	3.27e-12	Up	0.6746	1.122e-11	7.198e-09	Up	-0.05535	0.4522	0.9999	None
Lrrtm3	Inh_Kit	1	3.048	5.606e-12	1.218e-09	Up	2.247	1.552e-06	0.0001352	Up	-0.5838	0.2892	0.9999	None
Lsm11	Inh_Kit	1	-0.7046	0.004527	0.07533	Down	-0.764	0.001463	0.04327	Down				None
Luzp2	Inh_Kit	1	0.7096	0.001196	0.02613	Up	0.8198	0.0002917	0.01267	Up	0.09775	0.8223	0.9999	None
Lynx1	Inh_Kit	1	1.222	0.0003451	0.009838	Up	-0.01981	0.6224	0.9876	None	-1.249	0.004446	0.6852	None
Lypd6	Inh_Kit	1	-1.164	3.531e-06	0.0001785	Down	-1.293	5.584e-08	7.392e-06	Down				None
Lzts1	Inh_Kit	1	0.9137	0.0008274	0.01962	Up	0.742	0.009029	0.164	None	-0.1577	0.7928	0.9999	None
Macf1	Inh_Kit	0	-0.06067	0.4184	0.9071	None	-0.2177	0.001225	0.03771	Down	-0.257	0.05696	0.9999	None
Magi2	Inh_Kit	1	-0.1529	0.02194	0.2296	None	-0.2131	0.001697	0.04913	Down	-0.08283	0.4978	0.9999	None
Malat1	Inh_Kit	1	-0.175	0.0002105	0.006583	Down	-0.1706	0.000426	0.01671	Down	-0.002495	0.9986	0.9999	None
Mamld1	Inh_Kit	0	-1.101	0.004145	0.07119	Down	-0.6494	0.05636	0.4857	None	0.3586	0.3239	0.9999	None
Man2a1	Inh_Kit	1	-1.024	0.001014	0.02284	Down	-0.9274	0.02006	0.2716	None	0.008901	0.1409	0.9999	None
Map3k5	Inh_Kit	1	-0.8713	0.0003076	0.00896	Down	-0.5696	0.06328	0.5079	None	0.3634	0.2005	0.9999	None
Map4k4	Inh_Kit	0	1.17	0.004521	0.07533	Up	0.6903	0.1786	0.7559	None	-0.3747	0.5302	0.9999	None
Mapk14	Inh_Kit	0	-1.073	0.006504	0.09859	Down	-0.6327	0.173	0.7499	None	0.3916	0.5032	0.9999	None
March1	Inh_Kit	1	1.156	0.003819	0.06652	Up	1.699	3.83e-05	0.002218	Up	0.5598	0.3151	0.9999	None
March11	Inh_Kit	1	-1.977	1.118e-12	2.898e-10	Down	-1.943	3.152e-09	5.84e-07	Down	-0.1265	0.1618	0.9999	None
March4	Inh_Kit	1	-1.555	5.136e-06	0.0002457	Down	-0.5431	0.2777	0.8535	None	0.9676	0.007274	0.777	None
Mast4	Inh_Kit	1	0.8387	0.03197	0.2943	None	1.311	0.000514	0.01922	Up	0.5595	0.3442	0.9999	None
Mcf2	Inh_Kit	0	0.6937	0.004484	0.07494	Up	0.06995	0.3535	0.9008	None	-0.6679	0.05902	0.9999	None
Mdga2	Inh_Kit	1	0.5201	3.015e-09	3.189e-07	Up	0.4523	8.215e-07	7.785e-05	Up	-0.03248	0.8973	0.9999	None
Mdn1	Inh_Kit	1	0.2091	0.1212	0.6054	None	1.01	0.001423	0.04222	Up	0.754	0.1371	0.9999	None
Mef2c	Inh_Kit	1	0.3501	0.03925	0.3324	None	1.578	1.628e-06	0.0001399	Up	1.171	0.009586	0.8548	None
Meg3	Inh_Kit	1	0.3495	1.553e-10	2.311e-08	Up	0.3011	1.002e-07	1.247e-05	Up	-0.05067	0.652	0.9999	None
Megf10	Inh_Kit	1	-2.19	6.797e-11	1.115e-08	Down	-1.807	3.095e-07	3.267e-05	Down	0.3352	0.2091	0.9999	None
Megf11	Inh_Kit	1	-1.437	5.425e-05	0.001982	Down	-1.254	0.0009044	0.02923	Down	0.1066	0.9043	0.9999	None
Mettl24	Inh_Kit	1	0.6601	0.04318	0.3502	None	1.02	0.00133	0.0399	Up	0.2631	0.7261	0.9999	None
Mgat4c	Inh_Kit	1	1.817	9.791e-14	3.965e-11	Up	1.413	1.247e-07	1.529e-05	Up	-0.2978	0.1764	0.9999	None
Mgat5	Inh_Kit	1	-1.581	2.84e-07	1.887e-05	Down	-0.3501	0.1744	0.751	None	1.19	0.001771	0.6621	None
Mical2	Inh_Kit	1	-1.305	0.0008558	0.02007	Down	-1.445	0.0003188	0.01365	Down	-0.06853	0.6545	0.9999	None
Minar1	Inh_Kit	0	0.4133	0.1624	0.6825	None	0.8113	0.002063	0.05676	Up	0.3979	0.1889	0.9999	None
Mir124a-1hg	Inh_Kit	1	-0.8742	4.31e-05	0.001627	Down	-0.8887	5.944e-06	0.0004426	Down	-0.1269	0.8114	0.9999	None
Mir99ahg	Inh_Kit	1	0.4423	0.003074	0.05641	Up	0.3837	0.00932	0.1658	None	-0.001104	0.9299	0.9999	None
Mrpl38	Inh_Kit	0	-0.0493	0.8084	0.9899	None	-0.8381	0.002627	0.06846	Down	-0.7237	0.01239	0.9222	None
Mrps14	Inh_Kit	0	0.03359	0.988	0.9994	None	-0.7082	0.003674	0.08633	Down	-0.698	0.01099	0.8859	None
Mrps26	Inh_Kit	1	-1.012	0.0004082	0.01112	Down	-0.2717	0.3893	0.9192	None	0.7971	0.02374	0.9999	None
Msi2	Inh_Kit	1	0.269	0.01107	0.145	None	0.1681	0.001001	0.03197	Up	-0.08486	0.1999	0.9999	None
Mthfd1l	Inh_Kit	0	0.01401	0.3064	0.8411	None	0.8302	0.003442	0.08319	Up	0.8492	0.07856	0.9999	None
Mtus2	Inh_Kit	1	-0.02415	0.06658	0.443	None	0.4489	0.0003926	0.01574	Up	0.4458	0.06563	0.9999	None
Mycbp2	Inh_Kit	1	0.3623	9.538e-06	0.0004236	Up	0.06926	0.5685	0.9836	None	-0.2479	0.004173	0.6824	None
Myh14	Inh_Kit	1	1.031	0.0003032	0.008862	Up	0.196	0.5621	0.9814	None	-0.9554	0.002088	0.678	None
Naa25	Inh_Kit	0	-0.7266	0.004061	0.07005	Down	-0.2783	0.375	0.912	None	0.4469	0.1491	0.9999	None
Nav2	Inh_Kit	1	1.345	0.000492	0.01305	Up	1.497	3.12e-05	0.001886	Up	0.2753	0.5058	0.9999	None
Nav3	Inh_Kit	1	2.522	2.154e-09	2.438e-07	Up	1.491	0.001168	0.03617	Up	-0.9441	0.04934	0.9999	None
Ncam2	Inh_Kit	1	0.6427	0.0005282	0.0137	Up	0.2996	0.1195	0.6571	None	-0.2658	0.2523	0.9999	None
Ndfip2	Inh_Kit	0	1.358	0.0009537	0.02196	Up	0.5226	0.3545	0.9008	None	-0.7604	0.09995	0.9999	None
Ndrg4	Inh_Kit	1	-1.659	8.125e-06	0.000369	Down	-0.8924	0.0299	0.3421	None	0.735	0.06431	0.9999	None
Ndst3	Inh_Kit	1	-0.6949	0.02444	0.2474	None	-0.8568	0.002318	0.06195	Down	-0.1805	0.7694	0.9999	None
Nebl	Inh_Kit	1	1.446	1.178e-15	9.472e-13	Up	1.205	2.583e-10	7.428e-08	Up	-0.07163	0.2792	0.9999	None
Necab1	Inh_Kit	1	0.7949	0.0002407	0.00738	Up	1.131	6.53e-07	6.332e-05	Up	0.3215	0.4403	0.9999	None
Neurod6	Inh_Kit	1	1.034	0.0001556	0.005086	Up	0.7521	0.01532	0.2306	None	-0.2832	0.2005	0.9999	None
Nexmif	Inh_Kit	0	0.8583	0.01881	0.2092	None	1.008	0.004239	0.09592	Up	0.07431	0.7635	0.9999	None
Nfat5	Inh_Kit	0	0.4831	0.1676	0.6902	None	1.023	0.003012	0.07634	Up	0.6162	0.1216	0.9999	None
Nfib	Inh_Kit	1	0.4283	0.01407	0.1709	None	0.5203	0.0003644	0.0149	Up	0.1338	0.09256	0.9999	None
Nhs	Inh_Kit	1	1.622	0.0001749	0.005601	Up	1.244	0.01154	0.1894	None	-0.4919	0.4951	0.9999	None
Nipa1	Inh_Kit	0	0.5546	0.005606	0.08818	Up	0.7764	0.03368	0.3656	None	0.1033	0.3545	0.9999	None
Nol4	Inh_Kit	1	-1.093	0.0004378	0.01189	Down	-1.112	0.003621	0.08605	Down	0.008383	0.3638	0.9999	None
Nol4l	Inh_Kit	1	1.319	0.0002842	0.008429	Up	1.456	0.0002027	0.009495	Up	0.1549	0.9076	0.9999	None
Nos1ap	Inh_Kit	1	-0.6897	0.0006594	0.01661	Down	-0.7134	0.003893	0.08994	Down	-0.03459	0.6602	0.9999	None
Npas3	Inh_Kit	1	1.092	0.0001581	0.005144	Up	1.18	6.245e-05	0.003382	Up	0.1304	0.5898	0.9999	None
Nr3c1	Inh_Kit	1	-1.13	0.0003332	0.009605	Down	-1.034	0.00337	0.0822	Down	0.08433	0.5319	0.9999	None
Nrg1	Inh_Kit	1	1.539	7.506e-06	0.0003468	Up	1.043	0.001707	0.04925	Up	-0.5272	0.3981	0.9999	None
Nrg3	Inh_Kit	1	1.07	1.136e-11	2.227e-09	Up	0.7033	8.901e-06	0.0006084	Up	-0.2279	0.08557	0.9999	None
Nrg3os	Inh_Kit	1	1.71	1.121e-07	7.906e-06	Up	0.7357	0.1232	0.6671	None	-0.8832	0.0004608	0.4054	None
Nrg4	Inh_Kit	1	0.994	0.0003314	0.009605	Up	1.145	5.226e-05	0.002925	Up	0.09168	0.9563	0.9999	None
Nrp2	Inh_Kit	1	-0.8655	0.0001526	0.005029	Down	-1.06	8.331e-07	7.806e-05	Down				None
Nrxn1	Inh_Kit	1	-0.2181	0.001025	0.02302	Down	-0.2077	0.004254	0.09592	Down	-0.01683	0.4307	0.9999	None
Nrxn3	Inh_Kit	1	-0.3757	1.472e-11	2.752e-09	Down	-0.2161	0.0002801	0.01229	Down	0.1302	0.0609	0.9999	None
Nsg1	Inh_Kit	1	-1.148	0.003415	0.06125	Down	-1.061	0.009525	0.1686	None	0.02387	0.9974	0.9999	None
Nsg2	Inh_Kit	0	0.9181	0.00275	0.05177	Up	0.2509	0.6082	0.9876	None	-0.5521	0.155	0.9999	None
Nt5e	Inh_Kit	1	-0.6657	0.003393	0.06125	Down	-0.6664	0.004928	0.107	None				None
Ntn1	Inh_Kit	1	-1.002	0.003422	0.06125	Down	-0.4612	0.03985	0.4018	None	0.4489	0.01011	0.8548	None
Ntn4	Inh_Kit	1	-0.8458	0.0001668	0.005362	Down	-0.4862	0.07943	0.5607	None				None
Ntng1	Inh_Kit	1	1.612	2.909e-05	0.001158	Up	1.277	0.002395	0.0638	Up	-0.297	0.7129	0.9999	None
Ntrk2	Inh_Kit	1	-0.7981	0.0006988	0.01744	Down	-0.6173	0.0217	0.2832	None	0.1567	0.3011	0.9999	None
Nwd2	Inh_Kit	1	-1.155	0.002513	0.04856	Down	-1.312	0.0002678	0.01188	Down	-0.1868	0.77	0.9999	None
Nxph1	Inh_Kit	1	3.009	1.405e-13	5.134e-11	Up	2.794	9.382e-11	3.26e-08	Up	0.0454	0.7011	0.9999	None
Odc1	Inh_Kit	0	0.6856	0.005408	0.08608	Up	0.4608	0.0896	0.5953	None	-0.2538	0.6307	0.9999	None
Opcml	Inh_Kit	1	3.475	5.029e-20	1.011e-16	Up	2.716	1.044e-12	9.67e-10	Up	-0.4331	0.1497	0.9999	None
Osbpl1a	Inh_Kit	1	0.666	1.162e-05	0.0005055	Up	0.4909	0.008125	0.1521	None	-0.1215	0.2679	0.9999	None
Osbpl3	Inh_Kit	1	-1.34	1.454e-05	0.0006153	Down	-0.7102	0.07253	0.5414	None	0.5571	0.142	0.9999	None
Osbpl9	Inh_Kit	1	0.6186	0.002649	0.05022	Up	0.4896	0.01073	0.1819	None	-0.1054	0.8225	0.9999	None
P2ry14	Inh_Kit	1	-0.7419	0.002657	0.05024	Down	-0.9333	0.0005496	0.02019	Down	-0.2153	0.7849	0.9999	None
Pak1	Inh_Kit	1	-1.528	4.427e-06	0.000217	Down	-1.741	5.255e-09	8.764e-07	Down	-0.3031	0.4625	0.9999	None
Pakap	Inh_Kit	1	1.616	0.0002027	0.00639	Up	1.421	0.001626	0.04757	Up	-0.1006	0.8112	0.9999	None
Pakap-1	Inh_Kit	1	0.9374	0.002897	0.05404	Up	0.7482	0.01588	0.2365	None	-0.2235	0.5022	0.9999	None
Paqr9	Inh_Kit	1	-0.66	0.0008564	0.02007	Down	-0.1398	0.8051	0.9991	None				None
Pcdh10	Inh_Kit	1	0.9125	0.003699	0.065	Up	0.927	0.006327	0.1265	None	0.05272	0.7798	0.9999	None
Pcdh11x	Inh_Kit	1	1.579	1.361e-06	7.495e-05	Up	0.382	0.3523	0.9008	None	-1.268	0.001857	0.664	None
Pcdh15	Inh_Kit	1	2.14	6.254e-09	5.914e-07	Up	0.9579	0.01735	0.2511	None	-1.235	0.01686	0.9999	None
Pcdh17	Inh_Kit	1	1.164	0.0003862	0.01067	Up	0.9321	0.004896	0.1066	None	-0.2899	0.7004	0.9999	None
Pcsk6	Inh_Kit	1	-1.168	2.584e-05	0.001039	Down	-1.364	3.538e-07	3.619e-05	Down				None
Pdcd7	Inh_Kit	1	2.046	2.71e-09	2.904e-07	Up	1.621	8.899e-06	0.0006084	Up	-0.2851	0.5137	0.9999	None
Pde10a	Inh_Kit	1	-0.5554	0.001215	0.02646	Down	-1.055	0.0007152	0.02434	Down	-0.7302	0.1093	0.9999	None
Pde4b	Inh_Kit	1	1.332	0.00354	0.06267	Up	1.425	0.0008418	0.02775	Up	0.2059	0.4058	0.9999	None
Pde8b	Inh_Kit	0	0.7874	0.001774	0.03637	Up	0.3481	0.3059	0.8751	None	-0.4197	0.3296	0.9999	None
Pdhx	Inh_Kit	1	1.009	0.001463	0.03137	Up	0.4459	0.1096	0.638	None	-0.5842	0.1345	0.9999	None
Peli2	Inh_Kit	0	1.201	0.003448	0.06132	Up	0.8184	0.09666	0.6172	None	-0.4732	0.3632	0.9999	None
Pex5l	Inh_Kit	1	1.626	0.0002342	0.007213	Up	1.71	6.745e-05	0.003606	Up	0.2061	0.7918	0.9999	None
Phactr2	Inh_Kit	1	-2.206	1.502e-09	1.802e-07	Down	-2.167	4.089e-09	7.103e-07	Down	-0.03106	0.974	0.9999	None
Phf6	Inh_Kit	1	0.9965	0.001556	0.03282	Up	0.4404	0.4451	0.9462	None	-0.5527	0.1006	0.9999	None
Pik3cb	Inh_Kit	1	1.073	2.624e-05	0.001049	Up	0.5704	0.04562	0.4314	None	-0.6349	0.09332	0.9999	None
Pip5k1b	Inh_Kit	0	-1.14	0.001294	0.02811	Down	-0.6096	0.2183	0.79	None	0.499	0.158	0.9999	None
Pitpnc1	Inh_Kit	1	2.05	6.722e-07	4.032e-05	Up	1.569	0.0006397	0.02235	Up	-0.4775	0.5074	0.9999	None
Pkn2	Inh_Kit	1	0.633	0.006328	0.09652	Up	-0.534	0.04593	0.4322	None	-1.249	0.003951	0.6824	None
Pkp4	Inh_Kit	1	-0.3533	0.003704	0.065	Down	-0.3016	0.001298	0.03923	Down	-0.003922	0.798	0.9999	None
Pla2g4e	Inh_Kit	1	-2.056	8.497e-10	1.051e-07	Down	-0.962	0.01863	0.2617	None	1.101	0.00343	0.6824	None
Plcb1	Inh_Kit	1	-0.2387	0.002621	0.04981	Down	-0.2529	0.005618	0.1156	None	-0.0262	0.9384	0.9999	None
Plch1	Inh_Kit	1	-2.149	1.349e-11	2.582e-09	Down	-1.979	2.878e-10	7.778e-08	Down	0.04532	0.7968	0.9999	None
Plch2	Inh_Kit	1	-0.7352	0.0007086	0.01753	Down	-0.5026	0.04038	0.4043	None				None
Plcxd2	Inh_Kit	1	-0.8819	7.522e-05	0.002595	Down	-0.7198	0.003214	0.07977	Down				None
Pld5	Inh_Kit	1	-0.8972	1.246e-05	0.0005385	Down	-1.011	0.0006323	0.02225	Down	-0.1376	0.106	0.9999	None
Plekhd1	Inh_Kit	1	-1.119	4.213e-05	0.001597	Down	-1.064	0.0002572	0.01166	Down	-0.001978	0.9968	0.9999	None
Plekho1	Inh_Kit	0	-0.7215	0.05766	0.4125	None	-1.157	0.001645	0.04796	Down	-0.3564	0.5407	0.9999	None
Plp1	Inh_Kit	1	1.47	6.171e-05	0.002205	Up	0.721	0.08263	0.5704	None	-0.674	0.1191	0.9999	None
Plpp4	Inh_Kit	0	-0.752	0.003429	0.06125	Down	-0.2297	0.3964	0.9217	None	0.4685	0.08362	0.9999	None
Plxna4	Inh_Kit	1	-2.657	8.096e-13	2.231e-10	Down	-2.928	1.513e-15	3.155e-12	Down	-0.3631	0.5455	0.9999	None
Plxna4os3	Inh_Kit	1	-1.422	4.713e-06	0.0002268	Down	-1.584	1.648e-07	1.917e-05	Down	-0.2676	0.5464	0.9999	None
Plxnc1	Inh_Kit	0	-0.7387	0.006575	0.09916	Down	-0.4123	0.209	0.7827	None	0.2256	0.5828	0.9999	None
Ppip5k2	Inh_Kit	1	0.9202	0.001964	0.03942	Up	0.7228	0.09421	0.6095	None	-0.17	0.2906	0.9999	None
Ppm1b	Inh_Kit	1	-1.072	0.005231	0.08409	Down	-1.135	0.003362	0.0822	Down	-0.2633	0.7759	0.9999	None
Ppm1e	Inh_Kit	1	0.7888	0.01721	0.1988	None	1.238	0.0001609	0.007802	Up	0.4553	0.3788	0.9999	None
Ppm1l	Inh_Kit	1	0.6073	0.0002144	0.006654	Up	0.5025	0.04453	0.4278	None	-0.05475	0.1001	0.9999	None
Ppp1cc	Inh_Kit	1	-1.35	0.0004513	0.01221	Down	-1.273	0.0006912	0.02372	Down	0.06058	0.816	0.9999	None
Ppp2r2b	Inh_Kit	1	2.503	3.239e-10	4.412e-08	Up	1.973	1.556e-06	0.0001352	Up	-0.4687	0.1946	0.9999	None
Prickle2	Inh_Kit	1	1.582	4.333e-05	0.001627	Up	0.8125	0.0818	0.5667	None	-0.6929	0.09876	0.9999	None
Prkcd	Inh_Kit	1	-1.598	8.418e-10	1.051e-07	Down	-1.512	1.665e-08	2.571e-06	Down				None
Prkcg	Inh_Kit	1	-2.45	8.325e-13	2.231e-10	Down	-2.365	1.312e-11	7.372e-09	Down	-0.02572	0.9953	0.9999	None
Prkg1	Inh_Kit	1	-0.8452	0.002602	0.04968	Down	-0.9631	0.0004202	0.01661	Down				None
Prmt8	Inh_Kit	1	-1.239	0.0007109	0.01753	Down	-0.5999	0.1758	0.7518	None	0.5066	0.3189	0.9999	None
Prrt1	Inh_Kit	0	-0.8067	0.00603	0.09376	Down	-0.7971	0.01016	0.1758	None	0.02487	0.9593	0.9999	None
Psd2	Inh_Kit	0	-0.5043	0.1558	0.6778	None	-0.7058	0.002789	0.07222	Down	-0.2231	0.279	0.9999	None
Ptgds	Inh_Kit	1	3.255	3.39e-33	2.725e-29	Up	3.148	4.317e-28	3.6e-24	Up	-0.07109	0.9089	0.9999	None
Ptpn5	Inh_Kit	1	1.493	0.0003882	0.01069	Up	0.9071	0.06602	0.5197	None	-0.5583	0.3859	0.9999	None
Ptprd	Inh_Kit	1	2.604	2.457e-11	4.31e-09	Up	1.668	0.0003324	0.01407	Up	-0.8574	0.003275	0.6824	None
Ptpre	Inh_Kit	1	-1.042	0.002066	0.04121	Down	-0.05826	0.04471	0.4284	None	0.8595	0.07564	0.9999	None
Ptprg	Inh_Kit	1	1.065	1.525e-06	8.28e-05	Up	1.327	5.789e-10	1.341e-07	Up	0.1919	0.4321	0.9999	None
Ptprk	Inh_Kit	1	-2.78	5.402e-14	2.412e-11	Down	-2.482	9.224e-11	3.26e-08	Down	0.09621	0.9113	0.9999	None
Ptprt	Inh_Kit	1	1.854	3.31e-07	2.181e-05	Up	2.191	2.985e-10	7.778e-08	Up	0.4547	0.2935	0.9999	None
Ptprz1	Inh_Kit	1	-0.428	6.057e-07	3.689e-05	Down	-0.4515	0.0002611	0.01169	Down	-0.03636	0.09505	0.9999	None
Rab26	Inh_Kit	0	-0.6233	0.005948	0.09266	Down	-0.6029	0.01184	0.1931	None				None
Rab31	Inh_Kit	1	-1.137	0.00414	0.07119	Down	-1.335	0.0008304	0.02748	Down	-0.2006	0.8452	0.9999	None
Rab3c	Inh_Kit	1	-1.913	2.518e-09	2.773e-07	Down	-2.001	8.328e-10	1.827e-07	Down	-0.3154	0.7126	0.9999	None
Ralgds	Inh_Kit	0	-0.7826	0.00486	0.07988	Down	-0.6584	0.0414	0.4091	None	0.1986	0.5694	0.9999	None
Ranbp17	Inh_Kit	0	0.4035	0.3786	0.8895	None	1.088	0.00321	0.07977	Up	0.6918	0.1427	0.9999	None
Rap1gds1	Inh_Kit	1	1.175	0.00339	0.06125	Up	1.287	0.002851	0.07319	Up	0.1497	0.905	0.9999	None
Rapgef4	Inh_Kit	1	0.904	0.04044	0.3384	None	1.203	0.001134	0.03542	Up	0.3254	0.3204	0.9999	None
Rapgef6	Inh_Kit	0	0.6687	0.1036	0.555	None	1.063	0.004289	0.0964	Up	0.4548	0.3717	0.9999	None
Rasl12	Inh_Kit	0	0.8026	0.002552	0.04908	Up	0.6028	0.02816	0.3289	None	-0.2198	0.7641	0.9999	None
Rb1	Inh_Kit	1	1.177	0.0009926	0.02254	Up	0.4588	0.1203	0.6601	None	-0.5924	0.2874	0.9999	None
Rbfox3	Inh_Kit	0	0.4657	0.2631	0.7989	None	1.298	0.001803	0.05067	Up	0.8533	0.05342	0.9999	None
Rbms1	Inh_Kit	1	-1.266	0.0005546	0.01425	Down	-1.011	0.001004	0.03197	Down	0.2076	0.4345	0.9999	None
Rbms3	Inh_Kit	1	1.419	0.0004888	0.01301	Up	1.58	4.078e-05	0.002313	Up	0.1804	0.6407	0.9999	None
Rerg	Inh_Kit	1	2.028	1.588e-07	1.1e-05	Up	1.283	0.002424	0.06437	Up	-0.7409	0.2099	0.9999	None
Retreg1	Inh_Kit	1	1.073	0.001577	0.03311	Up	0.7383	0.0604	0.5012	None	-0.3379	0.6409	0.9999	None
Rgs6	Inh_Kit	1	3.406	3.489e-19	4.007e-16	Up	3.35	4.505e-19	1.878e-15	Up	0.1843	0.693	0.9999	None
Ric8b	Inh_Kit	1	-0.3839	0.01572	0.1853	None	-0.769	0.00226	0.06138	Down	-0.2705	0.7263	0.9999	None
Riok1	Inh_Kit	0	0.1239	0.2669	0.802	None	0.8905	0.002444	0.06469	Up	0.7859	0.07109	0.9999	None
Rmst	Inh_Kit	1	0.7553	0.02093	0.2237	None	1.272	3.595e-05	0.002096	Up	0.6488	0.114	0.9999	None
Rnf152	Inh_Kit	0	1.188	0.003327	0.06037	Up	0.6088	0.1928	0.7719	None	-0.6068	0.2582	0.9999	None
Rnpc3	Inh_Kit	1	0.4586	0.001964	0.03942	Up	-0.09884	0.7029	0.997	None	-0.5807	0.01481	0.9999	None
Robo1	Inh_Kit	1	2.808	8.318e-11	1.337e-08	Up	1.726	0.001066	0.03366	Up	-0.8619	0.02338	0.9999	None
Robo2	Inh_Kit	1	2.743	1.045e-09	1.273e-07	Up	2.807	2.286e-09	4.54e-07	Up	0.01585	0.9402	0.9999	None
Rora	Inh_Kit	1	-0.9561	1.406e-19	1.883e-16	Down	-0.6809	4.249e-10	1.074e-07	Down	0.2318	0.0467	0.9999	None
Rph3a	Inh_Kit	1	-1.135	0.0005964	0.01512	Down	-0.4794	0.01762	0.2525	None	0.602	0.2576	0.9999	None
Rreb1	Inh_Kit	1	-1.01	6.351e-05	0.00224	Down	-0.6706	0.02611	0.3142	None	0.2913	0.2323	0.9999	None
Rsrp1	Inh_Kit	0	0.3444	0.4101	0.9018	None	0.7695	0.003418	0.08305	Up	0.4982	0.09367	0.9999	None
Rtn4	Inh_Kit	0	1.024	0.005493	0.08658	Up	0.2429	0.4831	0.9603	None	-0.7473	0.1169	0.9999	None
Runx1t1	Inh_Kit	1	1.468	6.828e-05	0.002386	Up	1.482	9.732e-05	0.00501	Up	0.07374	0.8851	0.9999	None
Ryr2	Inh_Kit	1	1.978	3.482e-13	1.166e-10	Up	1.718	4.901e-10	1.202e-07	Up	-0.1012	0.8866	0.9999	None
Samd5	Inh_Kit	1	1.047	0.0009918	0.02254	Up	0.9366	0.01098	0.1855	None	-0.126	0.9334	0.9999	None
Sash1	Inh_Kit	0	0.7335	0.005105	0.08337	Up	0.2552	0.4763	0.9589	None	-0.5063	0.1413	0.9999	None
Scg2	Inh_Kit	1	1.03	0.008735	0.1245	None	1.377	0.0005233	0.01948	Up	0.4263	0.561	0.9999	None
Scn9a	Inh_Kit	1	0.5746	0.0007823	0.01878	Up	0.5924	0.0003393	0.01415	Up	0.06892	0.7301	0.9999	None
Scube1	Inh_Kit	1	1.359	6.355e-05	0.00224	Up	1.221	0.0006897	0.02372	Up	-0.03286	0.9921	0.9999	None
Sdk1	Inh_Kit	1	1.12	0.000367	0.01024	Up	0.9679	0.003371	0.0822	Up	-0.167	0.8785	0.9999	None
Sema3e	Inh_Kit	1	-1.357	2.168e-07	1.464e-05	Down	-1.276	1.499e-06	0.000133	Down				None
Sema5b	Inh_Kit	1	0.9465	0.0004815	0.01294	Up	0.7539	0.006562	0.1288	None	-0.09016	0.9558	0.9999	None
Sema6a	Inh_Kit	1	0.5614	0.1352	0.6342	None	1.181	0.0005381	0.01994	Up	0.7152	0.1229	0.9999	None
Senp2	Inh_Kit	1	-1.494	1.163e-05	0.0005055	Down	-1.127	0.003861	0.08944	Down	0.348	0.4075	0.9999	None
Sept4	Inh_Kit	1	-0.2373	0.7879	0.9887	None	-1.304	0.0005818	0.02118	Down	-1.165	0.006587	0.741	None
Serpini1	Inh_Kit	1	0.8344	0.002396	0.04675	Up	0.975	0.0004979	0.0187	Up	0.2003	0.7669	0.9999	None
Sez6l	Inh_Kit	1	1.412	0.0004869	0.013	Up	1.673	0.0001238	0.006181	Up	0.2268	0.7562	0.9999	None
Sgcd	Inh_Kit	1	-2.193	1.033e-07	7.414e-06	Down	-1.921	7.375e-06	0.0005302	Down	0.1701	0.7054	0.9999	None
Sgcz	Inh_Kit	1	-0.5476	0.119	0.5994	None	-1.061	3.42e-05	0.002023	Down	-0.6639	0.09893	0.9999	None
Sgms1	Inh_Kit	0	-0.1386	0.00261	0.04971	Down	-0.2174	0.2289	0.8019	None	-0.2347	0.2391	0.9999	None
Sh3kbp1	Inh_Kit	1	0.6489	0.002976	0.05512	Up	0.7679	0.0011	0.03448	Up	0.06592	0.9726	0.9999	None
Sh3pxd2a	Inh_Kit	1	0.8349	0.002832	0.05305	Up	0.6852	0.01906	0.2645	None	-0.1247	0.4502	0.9999	None
Sh3rf3	Inh_Kit	0	1.255	0.003474	0.06164	Up	0.8581	0.07871	0.5607	None	-0.3624	0.526	0.9999	None
Shank1	Inh_Kit	1	-1.459	0.0001393	0.004608	Down	-0.4244	0.3192	0.8813	None	0.9764	0.03768	0.9999	None
Shank2	Inh_Kit	1	-1.177	2.288e-06	0.0001218	Down	-0.8813	0.0005859	0.02124	Down	0.1775	0.7815	0.9999	None
Shc4	Inh_Kit	1	-1.513	1.232e-06	6.875e-05	Down	-1.624	1.76e-07	2.011e-05	Down	-0.1244	0.8917	0.9999	None
Shisa6	Inh_Kit	1	-2.908	1.036e-13	3.965e-11	Down	-2.472	5.177e-10	1.233e-07	Down	0.3476	0.5515	0.9999	None
Shisa9	Inh_Kit	1	3.104	1.464e-12	3.678e-10	Up	3.026	8.498e-12	5.906e-09	Up	0.1062	0.8585	0.9999	None
Sipa1l1	Inh_Kit	1	1.292	0.0008766	0.02048	Up	1.36	0.0004288	0.01671	Up	0.04983	0.9545	0.9999	None
Sipa1l3	Inh_Kit	1	-0.9893	0.004029	0.06965	Down	-1.109	0.004519	0.1008	None	-0.07549	0.8408	0.9999	None
Sla	Inh_Kit	1	-0.8859	0.0001282	0.004312	Down	-0.563	0.03004	0.3422	None				None
Slc20a1	Inh_Kit	1	-1.045	0.0008919	0.02078	Down	-0.7207	0.05395	0.4764	None	0.3238	0.5291	0.9999	None
Slc24a2	Inh_Kit	1	-0.6185	7.218e-07	4.187e-05	Down	-0.3613	0.005367	0.1127	None	0.2309	0.2569	0.9999	None
Slc24a3	Inh_Kit	1	-2.161	8.254e-10	1.051e-07	Down	-1.653	4.162e-07	4.132e-05	Down	0.4207	0.5926	0.9999	None
Slc25a13	Inh_Kit	0	1.106	0.002955	0.05497	Up	0.7142	0.1098	0.638	None	-0.5194	0.3322	0.9999	None
Slc25a16	Inh_Kit	1	0.876	0.002344	0.04606	Up	-0.009521	0.8905	0.9991	None	-0.8494	0.01024	0.8548	None
Slc25a5	Inh_Kit	1	-0.3352	0.1966	0.7307	None	-0.7127	0.0002243	0.01043	Down	-0.3294	0.1257	0.9999	None
Slc2a13	Inh_Kit	1	-1.321	0.0002594	0.007781	Down	-1.768	1.355e-07	1.614e-05	Down	-0.5039	0.2512	0.9999	None
Slc35f1	Inh_Kit	1	2.824	1.03e-10	1.593e-08	Up	2.166	2.055e-06	0.0001714	Up	-0.5105	0.4844	0.9999	None
Slc38a2	Inh_Kit	1	1.137	0.004345	0.07336	Up	0.7423	0.02766	0.3253	None	-0.4372	0.1666	0.9999	None
Slc44a5	Inh_Kit	1	0.9069	0.02915	0.2769	None	1.642	2.525e-05	0.001595	Up	0.7462	0.1267	0.9999	None
Slc4a10	Inh_Kit	1	-0.5682	0.00985	0.1342	None	-0.6455	0.0004197	0.01661	Down	-0.1126	0.4026	0.9999	None
Slc4a3	Inh_Kit	1	1.179	3.85e-06	0.0001922	Up	0.2323	0.3457	0.8962	None	-0.884	0.004965	0.7023	None
Slc6a5	Inh_Kit	1	1.776	6.84e-07	4.072e-05	Up	0.829	0.04024	0.4041	None	-0.9431	0.05743	0.9999	None
Slc8a1	Inh_Kit	1	-1.05	0.0005232	0.01367	Down	-1.424	9.94e-06	0.0006739	Down	-0.4501	0.412	0.9999	None
Slc8a3	Inh_Kit	1	-1.258	0.0009754	0.02234	Down	-0.5231	0.2621	0.8383	None	0.7541	0.1218	0.9999	None
Smchd1	Inh_Kit	1	1.171	0.003651	0.0645	Up	1.134	0.007026	0.1356	None	0.001819	0.9422	0.9999	None
Smim14	Inh_Kit	0	-1.142	0.003673	0.06475	Down	-0.6102	0.1772	0.7533	None	0.4745	0.4663	0.9999	None
Smyd3	Inh_Kit	0	0.1234	0.5476	0.9511	None	0.6538	0.002517	0.06642	Up	0.5834	0.05609	0.9999	None
Sncaip	Inh_Kit	1	1.221	0.0004671	0.0126	Up	1.062	0.003932	0.09059	Up	-0.1853	0.8413	0.9999	None
Snhg20	Inh_Kit	0	-1.006	0.001724	0.03544	Down	-0.3665	0.4734	0.9561	None	0.6752	0.07756	0.9999	None
Snrpn	Inh_Kit	1	1.539	5.229e-05	0.001919	Up	0.991	0.004256	0.09592	Up	-0.4436	0.4265	0.9999	None
Sorbs1	Inh_Kit	0	-1.279	0.001077	0.02397	Down	-0.6267	0.1578	0.7254	None	0.6875	0.1814	0.9999	None
Sorcs2	Inh_Kit	0	1.096	0.002255	0.04464	Up	0.7209	0.08182	0.5667	None	-0.4071	0.5551	0.9999	None
Sorcs3	Inh_Kit	1	-3.16	1.024e-13	3.965e-11	Down	-2.999	3.244e-12	2.705e-09	Down	0.03951	0.9714	0.9999	None
Sorl1	Inh_Kit	1	-1.449	0.0001385	0.004599	Down	-1.166	0.0004048	0.01615	Down	0.2917	0.2962	0.9999	None
Sox11	Inh_Kit	0	0.2551	0.5264	0.9433	None	0.8736	0.001935	0.05396	Up	0.7206	0.03769	0.9999	None
Specc1	Inh_Kit	0	0.6522	0.003314	0.06026	Up	0.0164	0.3171	0.8792	None	-0.5056	0.1773	0.9999	None
Sphkap	Inh_Kit	1	-2.416	2.305e-12	5.293e-10	Down	-2.851	9.839e-14	1.367e-10	Down	-0.4382	0.2616	0.9999	None
Spink13	Inh_Kit	0	0.8945	0.002963	0.05501	Up	0.4399	0.2452	0.8235	None	-0.5122	0.2175	0.9999	None
Spock3	Inh_Kit	1	-1.091	3.527e-05	0.001369	Down	-1.217	2.697e-06	0.0002183	Down	-0.195	0.7002	0.9999	None
Sptbn4	Inh_Kit	1	1.16	0.00093	0.02148	Up	0.6829	0.06027	0.5012	None	-0.3657	0.3235	0.9999	None
Sra1	Inh_Kit	0	-0.3888	0.1763	0.7059	None	-0.6915	0.00431	0.09662	Down	-0.3022	0.2324	0.9999	None
Srrm4	Inh_Kit	1	-1.427	7.091e-09	6.613e-07	Down	-1.12	7.612e-06	0.0005426	Down	0.1268	0.6451	0.9999	None
Ssbp4	Inh_Kit	1	1.061	0.005428	0.08623	Up	0.1501	0.1923	0.7719	None	-0.9919	0.01583	0.9999	None
Stard9	Inh_Kit	1	0.3246	0.05494	0.4044	None	0.6938	0.0003562	0.01478	Up	0.425	0.2374	0.9999	None
Stau2	Inh_Kit	1	0.675	0.0006913	0.01731	Up	0.6321	0.06748	0.5235	None	0.03739	0.1222	0.9999	None
Stt3b	Inh_Kit	1	-1.005	0.0007572	0.01844	Down	-0.7855	0.02258	0.2866	None	0.1733	0.8018	0.9999	None
Stxbp5l	Inh_Kit	1	1.388	4.662e-05	0.00172	Up	0.9126	0.02017	0.2721	None	-0.3551	0.485	0.9999	None
Supt3	Inh_Kit	1	0.4587	0.05189	0.3938	None	1.045	0.001663	0.04833	Up	0.5711	0.3777	0.9999	None
Syn3	Inh_Kit	1	0.9483	0.0011	0.02444	Up	0.392	0.3683	0.9074	None	-0.5465	0.02314	0.9999	None
Syndig1	Inh_Kit	1	-2.008	7.158e-09	6.613e-07	Down	-1.357	0.000157	0.007683	Down	0.4937	0.3946	0.9999	None
Syne1	Inh_Kit	1	-0.4452	0.002489	0.04832	Down	-0.1308	0.1386	0.6886	None	0.2022	0.03139	0.9999	None
Synpr	Inh_Kit	1	1.282	0.0002079	0.006527	Up	1.179	0.0006193	0.02206	Up	-0.06982	0.8976	0.9999	None
Syt9	Inh_Kit	1	-1.122	0.0002494	0.007593	Down	-1.038	0.001761	0.05013	Down	0.08349	0.8121	0.9999	None
Tanc2	Inh_Kit	1	1.903	3.71e-07	2.385e-05	Up	1.392	0.0005763	0.02108	Up	-0.3242	0.4358	0.9999	None
Tbc1d16	Inh_Kit	0	0.5439	0.133	0.6307	None	1.043	0.001754	0.0501	Up	0.4668	0.217	0.9999	None
Tbc1d4	Inh_Kit	1	-1.639	2.37e-06	0.0001253	Down	-1.07	0.000491	0.01861	Down	0.5483	0.3544	0.9999	None
Tcf25	Inh_Kit	1	0.8331	0.000797	0.01895	Up	0.2938	0.1006	0.6248	None	-0.3743	0.4265	0.9999	None
Tenm2	Inh_Kit	1	0.8166	0.0003576	0.01005	Up	0.4782	0.02208	0.2846	None	-0.2785	0.2289	0.9999	None
Tfap2b	Inh_Kit	1	-2.374	8.86e-11	1.396e-08	Down	-2.421	5.718e-11	2.384e-08	Down	-0.1924	0.6606	0.9999	None
Tg	Inh_Kit	1	-1.229	2.08e-08	1.742e-06	Down	-0.6386	0.01839	0.2601	None				None
Thrb	Inh_Kit	1	1.374	3.43e-09	3.483e-07	Up	0.7971	0.002553	0.06674	Up	-0.4858	0.02597	0.9999	None
Thsd7a	Inh_Kit	1	-0.8128	0.009278	0.1295	None	-1.2	2.321e-07	2.546e-05	Down	-0.3724	0.1458	0.9999	None
Tigd2	Inh_Kit	1	1.14	0.0002415	0.00738	Up	0.4531	0.2126	0.7845	None	-0.5734	0.148	0.9999	None
Timmdc1	Inh_Kit	1	1.217	0.0005128	0.01356	Up	0.1369	0.86	0.9991	None	-1.08	0.007724	0.8041	None
Tmeff2	Inh_Kit	1	-1.062	0.009433	0.1306	None	-1.474	0.0001575	0.007683	Down	-0.4319	0.1812	0.9999	None
Tmem164	Inh_Kit	0	-0.8885	0.00539	0.08596	Down	-0.6273	0.05754	0.4901	None	0.2479	0.7207	0.9999	None
Tmem67	Inh_Kit	0	0.7825	0.001586	0.03319	Up	0.3854	0.1705	0.7469	None	-0.3063	0.5099	0.9999	None
Tmod1	Inh_Kit	1	1.06	0.001856	0.03785	Up	0.8274	0.02628	0.3158	None	-0.192	0.8346	0.9999	None
Tmtc2	Inh_Kit	1	-0.22	0.00534	0.08533	Down	-0.4105	0.005694	0.1167	None	-0.137	0.004101	0.6824	None
Tnr	Inh_Kit	1	-1.783	2.371e-10	3.286e-08	Down	-1.064	0.0002623	0.01169	Down	0.6551	0.04147	0.9999	None
Trf	Inh_Kit	1	1.061	0.0003794	0.01051	Up	1.172	0.0008522	0.02798	Up	0.1648	0.3232	0.9999	None
Trim67	Inh_Kit	0	-0.6199	0.1232	0.611	None	-1.19	0.002551	0.06674	Down	-0.5282	0.3528	0.9999	None
Trim9	Inh_Kit	1	-0.9025	6.101e-06	0.0002868	Down	-0.6709	0.003092	0.0779	Down	0.1028	0.7301	0.9999	None
Trmt9b	Inh_Kit	1	-1.212	0.0004865	0.013	Down	-0.7165	0.07097	0.537	None	0.4431	0.3201	0.9999	None
Trpm3	Inh_Kit	1	-3.211	9.308e-21	2.494e-17	Down	-2.409	3.004e-14	5.01e-11	Down	0.6945	0.2444	0.9999	None
Tshz2	Inh_Kit	1	0.9211	0.0003334	0.009605	Up	0.4358	0.167	0.7417	None	-0.5292	0.191	0.9999	None
Ttc17	Inh_Kit	1	-0.9382	0.01671	0.1935	None	-1.335	0.0004283	0.01671	Down	-0.4081	0.5506	0.9999	None
Ttc3	Inh_Kit	1	0.4271	0.0005511	0.01424	Up	0.3243	0.008201	0.1527	None	-0.04454	0.8915	0.9999	None
Ubash3b	Inh_Kit	1	-1.485	2.57e-05	0.001038	Down	-0.9937	0.008202	0.1527	None	0.4314	0.4483	0.9999	None
Ube2cbp	Inh_Kit	0	0.5794	0.005909	0.09223	Up	0.3803	0.1251	0.6689	None	-0.1985	0.7087	0.9999	None
Ube2e2	Inh_Kit	1	0.4233	0.002601	0.04968	Up	0.09188	0.0753	0.551	None	-0.2904	0.04442	0.9999	None
Ube2k	Inh_Kit	0	0.5224	0.08355	0.4975	None	1.072	0.004089	0.09342	Up	0.5005	0.3313	0.9999	None
Ubl5	Inh_Kit	0	-0.8404	0.003876	0.0673	Down	-0.2773	0.2998	0.8732	None	0.5801	0.1029	0.9999	None
Unc13c	Inh_Kit	1	-1.819	1.214e-08	1.084e-06	Down	-1.62	5.219e-07	5.12e-05	Down	0.1374	0.9416	0.9999	None
Unc79	Inh_Kit	1	1.265	3.806e-07	2.409e-05	Up	1.123	2.901e-06	0.0002304	Up	-0.009355	0.9746	0.9999	None
Usp29	Inh_Kit	1	0.9307	0.004318	0.07306	Up	0.5244	0.005047	0.1084	None	-0.5167	0.3221	0.9999	None
Usp48	Inh_Kit	0	-1.072	0.003277	0.05973	Down	-0.5093	0.2807	0.856	None	0.4299	0.4351	0.9999	None
Utrn	Inh_Kit	1	-1.47	7.491e-06	0.0003468	Down	-1.582	2.267e-06	0.0001872	Down	-0.1258	0.9026	0.9999	None
Vav3	Inh_Kit	1	-2.193	2.301e-09	2.569e-07	Down	-2.483	4.485e-11	1.968e-08	Down	-0.4345	0.5217	0.9999	None
Vcan	Inh_Kit	1	-0.563	0.06937	0.4539	None	-0.8303	0.001281	0.03897	Down	-0.2373	0.3756	0.9999	None
Vegfa	Inh_Kit	1	-1.176	0.0009274	0.02148	Down	-0.8608	0.03703	0.386	None	0.3743	0.4232	0.9999	None
Vps8	Inh_Kit	0	0.2403	0.4453	0.9145	None	0.8552	0.002531	0.06657	Up	0.633	0.1376	0.9999	None
Vstm2a	Inh_Kit	0	0.5918	0.00236	0.04627	Up				None	-0.5526	0.02281	0.9999	None
Wdr48	Inh_Kit	1	0.536	0.06205	0.4263	None	0.9096	0.0007667	0.02577	Up	0.3115	0.2888	0.9999	None
Wdr59	Inh_Kit	0	-0.595	0.006618	0.09944	Down	-0.2977	0.3633	0.9057	None	0.3774	0.09778	0.9999	None
Wdr60	Inh_Kit	1	0.8842	0.004196	0.07161	Up	0.4295	0.4394	0.9444	None	-0.4201	0.02989	0.9999	None
Whrn	Inh_Kit	0	-1.139	0.006316	0.09652	Down	-0.3525	0.5772	0.9849	None	0.7556	0.1588	0.9999	None
Xkr4	Inh_Kit	1	-0.5402	9.273e-08	6.776e-06	Down	-0.698	3.295e-07	3.435e-05	Down	-0.2038	0.4733	0.9999	None
Xkr6	Inh_Kit	0	0.3536	0.1645	0.6858	None	0.8105	0.001777	0.05041	Up	0.4385	0.1792	0.9999	None
Zfp385b	Inh_Kit	1	0.7736	0.00139	0.02987	Up	0.7894	0.000271	0.01196	Up	0.08906	0.7379	0.9999	None
Zfp385c	Inh_Kit	1	-1.124	1.785e-07	1.216e-05	Down	-1.028	5.596e-06	0.0004242	Down				None
Zfp398	Inh_Kit	1	0.5993	0.0005234	0.01367	Up	0.01598	0.4094	0.9272	None	-0.6339	0.04864	0.9999	None
Zfp536	Inh_Kit	1	0.4814	0.002819	0.05293	Up	0.495	0.001974	0.05487	Up	0.09043	0.8194	0.9999	None
Zfyve9	Inh_Kit	1	0.4504	0.001112	0.02455	Up	0.3215	0.1013	0.6256	None	-0.08769	0.3871	0.9999	None
Zic1	Inh_Kit	1	-0.9254	0.0008401	0.01983	Down	-0.2833	0.5173	0.9701	None	0.6395	0.04567	0.9999	None
Zmat4	Inh_Kit	1	3.861	1.021e-15	9.122e-13	Up	3.119	2.431e-10	7.241e-08	Up	-0.4402	0.388	0.9999	None
Zmiz1	Inh_Kit	1	0.5126	0.01892	0.2092	None	1.302	0.00059	0.0213	Up	0.9114	0.03696	0.9999	None
Zmym1	Inh_Kit	1	0.1822	0.8271	0.9911	None	-1.077	0.0006589	0.0228	Down	-1.191	0.0004666	0.4054	None
mt-Atp6	Inh_Kit	1	2.167	6.362e-08	4.871e-06	Up	1.255	0.0004625	0.01777	Up	-0.8893	0.03765	0.9999	None
mt-Co1	Inh_Kit	1	2.084	5.684e-09	5.439e-07	Up	0.9934	2.98e-05	0.001814	Up	-1.2	0.00617	0.741	None
mt-Co2	Inh_Kit	1	2.438	1.345e-10	2.039e-08	Up	1.691	3.984e-05	0.002276	Up	-0.6927	0.1619	0.9999	None
mt-Co3	Inh_Kit	1	2.291	1.336e-08	1.174e-06	Up	1.691	0.00011	0.005596	Up	-0.7024	0.2757	0.9999	None
mt-Cytb	Inh_Kit	1	2.252	1.359e-08	1.174e-06	Up	1	0.00131	0.03944	Up	-1.257	0.003619	0.6824	None
mt-Nd1	Inh_Kit	1	1.976	1.528e-07	1.068e-05	Up	1.518	5.998e-05	0.003269	Up	-0.4089	0.4065	0.9999	None
mt-Nd2	Inh_Kit	1	1.758	2.896e-06	0.0001474	Up	0.395	2.906e-05	0.001782	Up	-1.344	1.192e-05	0.04902	Down
mt-Nd4	Inh_Kit	1	1.591	2.19e-05	0.0008937	Up	1.005	0.006894	0.1337	None	-0.5838	0.3301	0.9999	None
mt-Nd5	Inh_Kit	1	0.7702	0.001514	0.03202	Up	0.3978	0.03462	0.3711	None	-0.3561	0.391	0.9999	None
B3gat1	Inh_Kit	0				None	-0.6522	0.002759	0.07168	Down				None
Gm30541	Inh_Kit	0				None	0.7392	0.0006215	0.02206	Up	0.5574	0.04955	0.9999	None
Gng2	Inh_Kit	1				None	0.8789	9.146e-05	0.004767	Up	0.5936	0.03317	0.9999	None
Slc36a2	Inh_Kit	1				None	0.8386	0.0002832	0.01237	Up	0.6396	0.02578	0.9999	None
6330576A10Rik	Inh_Zfhx4	1	-1.025	5.13e-05	0.02169	Down	-0.4582	0.08285	0.8407	None	0.5405	0.02698	0.6548	None
8030451O07Rik	Inh_Zfhx4	1	-1.377	2.484e-06	0.001697	Down	-0.77	0.03249	0.6659	None	0.5391	0.05262	0.7811	None
9630014M24Rik	Inh_Zfhx4	1	0.2352	0.2993	0.9999	None	-0.7595	0.02136	0.6209	None	-0.9374	0.0001062	0.04096	Down
AC149090.1	Inh_Zfhx4	1	-0.5114	0.01217	0.5625	None	0.2766	0.0001095	0.05589	Up	0.691	1.396e-11	6.189e-08	Up
Apod	Inh_Zfhx4	1	1.25	2.357e-05	0.01231	Up	1.583	2.282e-07	0.001048	Up	0.4669	0.1505	0.9385	None
B230217J21Rik	Inh_Zfhx4	1	-0.5822	0.0001203	0.0445	Down	-0.3989	0.4394	0.9897	None	0.1077	0.001714	0.2269	None
B3gat1	Inh_Zfhx4	0	-0.4743	0.02828	0.7154	None	0.3093	0.5073	0.9941	None	0.8483	0.000123	0.04365	Up
Cacna2d2	Inh_Zfhx4	1	0.8372	0.0001315	0.04668	Up	0.4737	0.004932	0.3626	None	-0.2551	0.1295	0.9174	None
Ccbe1	Inh_Zfhx4	0	0.5568	0.07375	0.8732	None	1.259	0.000205	0.07663	Up	0.6578	0.06365	0.7975	None
Chgb	Inh_Zfhx4	1	-0.09182	0.2172	0.9999	None	-1.045	1.356e-05	0.01557	Down	-1.09	4.193e-05	0.02066	Down
Ckb	Inh_Zfhx4	1	0.3103	0.1363	0.9558	None	-0.4425	0.001408	0.2021	None	-0.8111	3.156e-05	0.01866	Down
Dpm1	Inh_Zfhx4	1	0.6257	0.0003007	0.08443	Up	0.09258	0.3638	0.9851	None	-0.5183	0.009158	0.4806	None
Dscam	Inh_Zfhx4	1	-0.2353	0.0002158	0.06754	Down	-0.04043	0.5952	0.9941	None	0.2031	0.001266	0.1936	None
Elavl4	Inh_Zfhx4	0	-0.1572	0.0751	0.8732	None	-0.2719	0.0001026	0.05546	Down	-0.07972	0.1938	0.9535	None
Entr1	Inh_Zfhx4	1	-0.7353	0.05431	0.8128	None	-1.408	1.055e-05	0.01557	Down	-0.6633	0.01887	0.5873	None
Far1os	Inh_Zfhx4	1	-1.4	2.187e-05	0.01214	Down	-0.73	0.03701	0.7041	None	0.6207	0.07458	0.8341	None
Fgfr2	Inh_Zfhx4	1	-0.2381	0.001701	0.2745	None	-0.00111	0.9896	0.9991	None	0.2229	0.0002536	0.07018	Up
Fkbp5	Inh_Zfhx4	1	0.8335	0.001837	0.2788	None	1.124	1.148e-05	0.01557	Up	0.3021	0.3051	0.985	None
Fyco1	Inh_Zfhx4	1	1.278	3.001e-05	0.01332	Up	0.4797	0.124	0.8944	None	-0.8256	0.00214	0.2572	None
Gm20642	Inh_Zfhx4	1	-0.5249	4.949e-08	4.881e-05	Down	-0.3707	0.0002616	0.08585	Down	0.1392	0.1094	0.8965	None
Gm32647	Inh_Zfhx4	0	1.269	0.0003475	0.09349	Up	0.8684	0.02618	0.6367	None	-0.4233	0.3698	0.9994	None
Gm46102	Inh_Zfhx4	1	0.3281	0.2858	0.9999	None	1.434	2.056e-06	0.004724	Up	1.16	1.672e-05	0.01059	Up
Gm47167	Inh_Zfhx4	1	-0.8893	0.01391	0.5991	None	0.07563	0.213	0.9382	None	0.8919	0.000115	0.04251	Up
Gm47283	Inh_Zfhx4	1	-0.7355	0.04922	0.7933	None	0.5362	0.001765	0.2302	None	1.135	3.628e-07	0.0004597	Up
Gm9866	Inh_Zfhx4	1	0.05077	0.9239	0.9999	None	0.8556	0.004637	0.3556	None	0.8708	0.0002888	0.07018	Up
Gpr162	Inh_Zfhx4	1	-1.313	6.91e-06	0.00409	Down	-0.9589	0.003585	0.3291	None	0.3399	0.1726	0.9463	None
Grin1	Inh_Zfhx4	0	-0.449	0.03299	0.7307	None	-0.3191	0.3342	0.9851	None	0.1029	0.0004623	0.09318	Up
Grip1os2	Inh_Zfhx4	1	-0.1632	0.0538	0.8101	None	-0.9237	4.764e-05	0.0339	Down	-0.7346	0.007772	0.4787	None
Gsk3b	Inh_Zfhx4	0	0.193	0.06611	0.8647	None	0.06507	0.4238	0.9875	None	-0.2077	0.0002401	0.07018	Down
Hacd3	Inh_Zfhx4	1	0.06311	0.3593	0.9999	None	-0.6885	0.0002317	0.07887	Down	-0.8295	0.001999	0.2463	None
Haghl	Inh_Zfhx4	0	-0.7882	0.02926	0.7154	None	-1.22	0.0002007	0.07663	Down	-0.4377	0.2373	0.9744	None
Hnrnpa3	Inh_Zfhx4	1	0.07877	0.1803	0.9999	None	-0.8847	0.02006	0.6209	None	-1.06	0.0002754	0.07018	Down
Hspa5	Inh_Zfhx4	1	0.2423	0.5996	0.9999	None	-1.067	0.002781	0.2971	None	-1.176	9.092e-05	0.0384	Down
Hspa8	Inh_Zfhx4	1	0.8602	0.005602	0.4251	None	-0.3359	0.01684	0.6054	None	-1.111	8.651e-05	0.03836	Down
Itgbl1	Inh_Zfhx4	1	-1.265	1.098e-07	9.747e-05	Down	-0.7708	0.0005979	0.1387	None	0.5274	0.06387	0.7975	None
Itm2c	Inh_Zfhx4	1	-0.9381	0.001853	0.2788	None	-1.132	5.324e-05	0.0339	Down	-0.2162	0.6104	0.9994	None
Lars2	Inh_Zfhx4	1	0.8366	0.01068	0.5228	None	1.256	0.0001163	0.05626	Up	0.3553	0.3084	0.985	None
Lingo2	Inh_Zfhx4	0	0.03843	0.5106	0.9999	None	-0.1822	0.03588	0.6968	None	-0.2419	0.0003908	0.08061	Down
Malat1	Inh_Zfhx4	1	-0.1779	4.732e-06	0.003001	Down	-0.1061	0.006742	0.4214	None	0.0635	0.1164	0.9026	None
Mast4	Inh_Zfhx4	1	0.3716	0.02067	0.6567	None	0.7905	0.0002085	0.07663	Up	0.3924	0.2409	0.9745	None
Mef2c	Inh_Zfhx4	1	-0.3963	0.4303	0.9999	None	0.8096	0.005658	0.388	None	1.249	1.448e-05	0.009876	Up
Nbas	Inh_Zfhx4	1	0.3422	0.09796	0.9107	None	1.024	0.0002245	0.07887	Up	0.7135	0.02776	0.655	None
Ndufc2	Inh_Zfhx4	0	0.1645	0.8416	0.9999	None	-0.6829	0.01149	0.5386	None	-0.8834	0.0001983	0.06283	Down
Nrg3	Inh_Zfhx4	1	0.1314	0.006771	0.4452	None	-0.03881	0.4254	0.9875	None	-0.1583	0.0002943	0.07018	Down
Nrg3os	Inh_Zfhx4	0	0.2033	0.01909	0.6408	None	-0.11	0.4557	0.9906	None	-0.3217	0.0003842	0.08061	Down
Olfm1	Inh_Zfhx4	1	-0.575	0.04691	0.7893	None	-1.137	0.0001796	0.075	Down	-0.5775	0.09103	0.8729	None
Pcdh15	Inh_Zfhx4	1	0.3937	0.1355	0.9558	None	-0.288	0.02191	0.623	None	-0.7009	3.97e-05	0.02066	Down
Phf20l1	Inh_Zfhx4	1	1.416	2.445e-06	0.001697	Up	0.8374	0.005269	0.3725	None	-0.4551	0.1337	0.9217	None
Phf3	Inh_Zfhx4	0	1.001	5.599e-05	0.0226	Up	0.6995	0.02806	0.6557	None	-0.167	0.455	0.9994	None
Phlpp1	Inh_Zfhx4	1	0.5384	0.1686	0.9994	None	0.8572	0.001778	0.2302	None	0.3098	0.0003063	0.07018	Up
Prpf4b	Inh_Zfhx4	1	-0.04474	0.4631	0.9999	None	-0.2029	0.01258	0.5537	None	-0.1672	0.0002772	0.07018	Down
Psmf1	Inh_Zfhx4	1	0.7176	0.0001015	0.03917	Up	0.2834	0.1288	0.8951	None	-0.4609	0.01844	0.5853	None
Ptgds	Inh_Zfhx4	1	3.051	9.175e-31	8.146e-27	Up	2.249	1.445e-17	1.328e-13	Up	-0.6223	0.009796	0.4869	None
Pzp	Inh_Zfhx4	1	-0.8274	0.0002529	0.07484	Down	-0.8269	0.0003331	0.1015	None				None
Rap1a	Inh_Zfhx4	1	-0.2782	0.2094	0.9999	None	0.8405	0.02245	0.623	None	1.083	6.674e-05	0.03115	Up
Rbm39	Inh_Zfhx4	1	-0.3177	0.0002206	0.06754	Down	-0.2535	0.0003703	0.1063	None	0.06698	0.7025	0.9994	None
Rnf215	Inh_Zfhx4	1	-0.5722	0.0701	0.8667	None	-1.083	5.109e-05	0.0339	Down	-0.441	0.08115	0.8473	None
Rpl5	Inh_Zfhx4	1	-0.507	0.1379	0.9563	None	-1.177	1.292e-05	0.01557	Down	-0.6384	0.01788	0.5807	None
Rsf1os1	Inh_Zfhx4	1	0.3742	0.1025	0.919	None	1.146	0.0007676	0.1507	None	0.88	0.0002604	0.07018	Up
Rsrc2	Inh_Zfhx4	0	0.6473	0.09407	0.9035	None	1.289	0.000132	0.06065	Up	0.5572	0.1118	0.9018	None
Rsrp1	Inh_Zfhx4	1	-0.604	2.982e-05	0.01332	Down	-0.02099	0.6004	0.9941	None	0.5718	1.181e-06	0.001047	Up
Sae1	Inh_Zfhx4	1	0.3225	0.1112	0.9335	None	0.8135	3.165e-05	0.02909	Up	0.3816	0.09761	0.8872	None
Scn9a	Inh_Zfhx4	1	-0.2999	0.007949	0.4553	None	0.2977	0.0004587	0.1204	None	0.6212	3.042e-14	2.698e-10	Up
Slc6a15	Inh_Zfhx4	0	0.03623	0.7792	0.9999	None	0.1914	0.0339	0.6757	None	0.1349	0.0003286	0.07112	Up
Son	Inh_Zfhx4	1	0.02862	0.000175	0.05859	None	-0.1581	0.000147	0.06434	Down	-0.2879	0.2078	0.9549	None
Sphkap	Inh_Zfhx4	1	0.4427	0.003147	0.348	None	0.05091	0.8533	0.9948	None	-0.4449	0.000197	0.06283	Down
Sptan1	Inh_Zfhx4	0	0.5451	0.0003043	0.08443	Up	0.2639	0.01029	0.5109	None	-0.2619	0.4674	0.9994	None
Ssbp3	Inh_Zfhx4	1	-0.4102	0.3731	0.9999	None	0.1513	0.05118	0.7465	None	0.6897	0.0001039	0.04096	Up
Tigd2	Inh_Zfhx4	1	0.7009	0.002899	0.348	None	-0.2285	0.6538	0.9941	None	-0.9023	0.0002623	0.07018	Down
Tmem184b	Inh_Zfhx4	1	-1.256	0.0001782	0.05859	Down	-0.1533	0.8417	0.9948	None	1.07	0.0003086	0.07018	Up
Tmem196	Inh_Zfhx4	1	-1.015	0.00507	0.4092	None	-1.295	5.535e-05	0.0339	Down	-0.2356	0.571	0.9994	None
Trpc6	Inh_Zfhx4	0	-0.3556	0.2689	0.9999	None	0.6661	0.04538	0.7374	None	0.9085	0.0003288	0.07112	Up
Ube2j1	Inh_Zfhx4	1	1.207	2.816e-05	0.01332	Up	0.7293	0.03745	0.7047	None	-0.5168	0.03079	0.6827	None
Ubl5	Inh_Zfhx4	1	-0.8788	0.003093	0.348	None	-1.097	9.982e-05	0.05546	Down	-0.2396	0.4961	0.9994	None
Zbtb16	Inh_Zfhx4	1	0.3097	0.07304	0.8732	None	1.044	2.418e-05	0.02469	Up	0.68	0.005385	0.4047	None
Zmym1	Inh_Zfhx4	1	-0.8251	0.006146	0.4406	None	-1.391	5.053e-07	0.001548	Down	-0.6847	0.01143	0.5153	None
mt-Atp6	Inh_Zfhx4	1	2.001	4.666e-08	4.881e-05	Up	0.3988	0.3437	0.9851	None	-1.664	1.58e-06	0.001274	Down
mt-Co1	Inh_Zfhx4	1	2.042	4.563e-09	6.752e-06	Up	0.4646	0.2955	0.9703	None	-1.628	5.314e-07	0.0005891	Down
mt-Co2	Inh_Zfhx4	1	1.852	3.563e-08	4.519e-05	Up	0.3155	0.566	0.9941	None	-1.574	1.458e-07	0.0002586	Down
mt-Co3	Inh_Zfhx4	1	2.393	2.103e-11	6.454e-08	Up	0.8862	0.05139	0.7473	None	-1.443	3.249e-07	0.0004597	Down
mt-Cytb	Inh_Zfhx4	1	2.573	2.181e-11	6.454e-08	Up	0.8756	0.03884	0.7091	None	-1.743	6.115e-08	0.0001356	Down
mt-Nd1	Inh_Zfhx4	1	2.216	4.659e-10	1.034e-06	Up	0.7051	0.08434	0.8409	None	-1.552	9.796e-07	0.0009653	Down
mt-Nd2	Inh_Zfhx4	1	1.813	2.737e-07	0.0002209	Up	0.4577	0.3768	0.9872	None	-1.424	4.228e-06	0.003125	Down
mt-Nd4	Inh_Zfhx4	1	2.026	2.967e-09	5.269e-06	Up	0.0588	0.3189	0.9792	None	-1.941	2.017e-09	5.963e-06	Down
mt-Nd4l	Inh_Zfhx4	1	0.7807	0.000508	0.1271	None				None	-0.7628	3.642e-05	0.02019	Down
mt-Nd5	Inh_Zfhx4	1	0.7356	0.002178	0.3021	None	0.007167	0.8731	0.9978	None	-0.7295	0.0002333	0.07018	Down
Lypla2	Inh_Zfhx4	1				None	0.8278	5.443e-05	0.0339	Up	0.6974	0.0001485	0.05064	Up

## Sheet: S5b
TF	CellType	avg_RAS	RSS_score	statistic_CD_vs_HC	log2FC_CD_vs_HC	wilcox_p_CD_vs_HC	wilcox_padj_CD_vs_HC	statistic_TN_vs_HC	log2FC_TN_vs_HC	wilcox_p_TN_vs_HC	wilcox_padj_TN_vs_HC	statistic_TN_vs_CD	log2FC_TN_vs_CD	wilcox_p_TN_vs_CD	wilcox_padj_TN_vs_CD
Ahdc1	Inh_Zfhx4	0.001478	0.2076	57140	0.5233	0.0831	0.2602	46400	0.1912	0.645	0.8462	85870	-0.3322	0.138	0.5113
Alx4	Inh_Zfhx4	0.001756	0.1957	58680	1.559	0.797	0.8933	46180	1.463	0.438	0.7139	83290	-0.0966	0.534	0.8044
Arid3a	Inh_Zfhx4	0.007081	0.5083	52430	0.2111	0.0151	0.08622	42020	0.1622	0.0328	0.186	85000	-0.04882	0.758	0.9049
Atf2	Inh_Zfhx4	0.006023	0.3327	57890	-0.1733	0.67	0.8328	46040	-0.2068	0.723	0.8798	84050	-0.03353	0.974	0.9859
Bach2	Inh_Zfhx4	0.1374	0.6616	75760	-0.06759	1.95e-10	1.355e-08	54160	-0.04237	0.000724	0.0107	72520	0.02522	0.000778	0.02484
Bclaf1	Inh_Zfhx4	0.04511	0.5524	60100	-0.01968	0.646	0.8188	45740	0.00205	0.655	0.8473	80620	0.02173	0.328	0.6822
Bhlhe22	Inh_Zfhx4	0.0007617	0.1794	58770	1.17	0.855	0.9237	47060	0.6489	0.395	0.6702	84720	-0.5215	0.256	0.6373
Bptf	Inh_Zfhx4	0.02557	0.5326	58870	-0.003349	0.996	0.998	45860	0.008661	0.694	0.873	82570	0.01201	0.685	0.8641
Brf1	Inh_Zfhx4	0.001297	0.1823	60240	-4.949	0.00791	0.0564	47490	-1.205	0.127	0.4418	83390	3.744	0.265	0.6431
Ccnt2	Inh_Zfhx4	0.03049	0.497	58750	0.002557	0.962	0.9842	45770	0.03645	0.665	0.8536	82010	0.03389	0.569	0.8228
Cebpb	Inh_Zfhx4	0.002648	0.4263	54690	0.2283	0.114	0.3212	44430	0.1637	0.297	0.6059	86160	-0.06459	0.516	0.802
Cic	Inh_Zfhx4	0.05135	0.5019	60260	-0.05637	0.597	0.7903	41840	0.1782	0.025	0.1481	73320	0.2346	0.00153	0.03735
Clock	Inh_Zfhx4	0.024	0.5443	48070	0.06643	4.63e-05	0.001287	45190	0.003765	0.487	0.7495	97880	-0.06267	4.19e-05	0.004347
Creb1	Inh_Zfhx4	0.01784	0.5976	61450	-0.01992	0.333	0.5927	49590	-0.08062	0.192	0.508	85140	-0.0607	0.726	0.8914
Cux1	Inh_Zfhx4	0.02005	0.5694	52280	0.1332	0.0129	0.07576	44760	0.02995	0.373	0.6689	90490	-0.1032	0.0544	0.3496
E2f3	Inh_Zfhx4	0.008423	0.4595	56520	0.2167	0.374	0.634	45670	0.1771	0.633	0.8462	85570	-0.03958	0.633	0.8326
Ebf1	Inh_Zfhx4	0.04723	0.7705	61200	-0.04514	0.382	0.6423	53990	-0.1527	0.00096	0.01278	93640	-0.1075	0.00436	0.06462
Ep300	Inh_Zfhx4	0.001181	0.2117	58960	0.1338	0.934	0.9713	47120	-0.02325	0.599	0.8406	84550	-0.1571	0.611	0.8274
Erf	Inh_Zfhx4	0.001483	0.2271	57170	0.6927	0.173	0.417	45260	0.9273	0.159	0.4686	83770	0.2346	0.915	0.9662
Ets1	Inh_Zfhx4	0.002365	0.3084	58470	0.06592	0.833	0.9137	46060	0.2671	0.683	0.8674	83430	0.2012	0.836	0.9277
Etv1	Inh_Zfhx4	0.007296	0.4741	51430	0.2418	0.00498	0.03994	46440	-0.02299	0.898	0.9544	94350	-0.2648	0.00223	0.04407
Etv3	Inh_Zfhx4	0.002416	0.24	60150	0.04942	0.4	0.649	47600	0.06523	0.483	0.7495	83760	0.01581	0.919	0.9676
Etv4	Inh_Zfhx4	0.02541	0.5109	58320	0.0278	0.833	0.9137	46070	0.03153	0.769	0.8926	83290	0.003729	0.845	0.9277
Etv5	Inh_Zfhx4	0.05115	0.559	55780	0.04335	0.243	0.4919	42670	0.0572	0.0659	0.2911	81500	0.01385	0.471	0.7882
Etv6	Inh_Zfhx4	0.01141	0.4768	49900	0.1345	0.000713	0.009911	43540	0.04043	0.149	0.4503	91880	-0.09409	0.0196	0.1937
Fli1	Inh_Zfhx4	0.02257	0.5474	55120	0.08214	0.156	0.3895	42050	0.1011	0.0337	0.1885	81430	0.01898	0.459	0.7824
Fosl2	Inh_Zfhx4	0.008798	0.3823	60140	-0.04238	0.63	0.8133	43410	0.1757	0.127	0.4418	76560	0.218	0.0274	0.249
Foxj3	Inh_Zfhx4	0.004275	0.3268	57340	0.2701	0.472	0.693	44610	0.5321	0.237	0.5481	82450	0.262	0.589	0.8274
Foxo1	Inh_Zfhx4	0.001495	0.2881	55080	0.6276	0.0618	0.213	45940	0.2545	0.631	0.8462	87900	-0.373	0.13	0.4995
Foxo3	Inh_Zfhx4	0.005501	0.2376	59810	0.01262	0.512	0.7287	47930	-0.2475	0.295	0.6059	84800	-0.2602	0.626	0.8274
Gabpa	Inh_Zfhx4	0.001534	0.2428	59840	-0.1193	0.497	0.7171	48010	-0.2857	0.264	0.5722	84830	-0.1665	0.612	0.8274
Gatad2a	Inh_Zfhx4	0.004076	0.2342	57150	1.214	0.117	0.3253	44760	1.111	0.0411	0.2232	82930	-0.1035	0.52	0.8023
Glis1	Inh_Zfhx4	0.001105	0.2255	58970	0.09794	0.939	0.9716	47840	-0.7342	0.232	0.5481	85780	-0.8322	0.213	0.5948
Gtf2ird1	Inh_Zfhx4	0.0397	0.4962	60040	-0.03515	0.663	0.8315	41640	0.08257	0.0209	0.1311	73310	0.1177	0.00175	0.04035
Hes5	Inh_Zfhx4	0.0006408	0.198	58170	0.3312	0.403	0.6514	46080	0.2868	0.363	0.662	83800	-0.04438	0.898	0.963
Hey2	Inh_Zfhx4	0.01682	0.3069	59680	0.06319	0.744	0.8715	46120	0.09321	0.769	0.8926	81770	0.03002	0.487	0.7926
Hltf	Inh_Zfhx4	0.05835	0.5408	58890	-0.000859	0.998	0.998	42530	0.03084	0.057	0.2651	76600	0.0317	0.0307	0.2514
Hmbox1	Inh_Zfhx4	0.01878	0.3713	57740	0.09767	0.63	0.8133	44800	0.1282	0.333	0.6412	82330	0.03052	0.598	0.8274
Hmga2	Inh_Zfhx4	0.01428	0.3212	57990	0.04685	0.738	0.8669	45580	0.06088	0.606	0.8447	83440	0.01403	0.88	0.9493
Hsf1	Inh_Zfhx4	0.001201	0.2806	56590	0.3424	0.205	0.4499	44780	0.467	0.193	0.508	83710	0.1246	0.921	0.9676
Ikzf1	Inh_Zfhx4	0.00453	0.4991	47550	0.4622	1.95e-05	0.0006255	42370	0.3473	0.0483	0.2409	92760	-0.1149	0.00954	0.107
Ikzf2	Inh_Zfhx4	0.002495	0.3222	46730	1.61	3.04e-07	1.152e-05	42570	1.176	0.0252	0.1481	93390	-0.4348	0.00214	0.04407
Ikzf5	Inh_Zfhx4	0.002021	0.2794	57970	0.07939	0.612	0.8025	47430	-0.03038	0.614	0.8462	86510	-0.1098	0.256	0.6373
Irf8	Inh_Zfhx4	0.001445	0.3398	54790	0.5436	0.0866	0.2655	44900	0.8138	0.352	0.6617	86490	0.2702	0.408	0.733
Irx5	Inh_Zfhx4	0.005654	0.2589	59150	0.3249	0.88	0.9348	45860	0.1512	0.574	0.8223	82180	-0.1737	0.446	0.7712
Jund	Inh_Zfhx4	0.002506	0.2761	59050	-0.4415	0.927	0.9706	48100	-0.6155	0.346	0.6571	86220	-0.1741	0.319	0.6789
Klf13	Inh_Zfhx4	0.01133	0.5007	58190	0.05123	0.795	0.8933	47260	0.1089	0.807	0.9101	85740	0.05763	0.598	0.8274
Klf2	Inh_Zfhx4	0.00074	0.2417	60340	-0.004509	0.314	0.5644	46970	-0.0283	0.845	0.9206	82320	-0.02379	0.38	0.7197
Klf7	Inh_Zfhx4	0.02463	0.5809	53250	0.05959	0.0339	0.1488	40140	0.09642	0.00278	0.02951	80240	0.03684	0.276	0.6531
Kmt2b	Inh_Zfhx4	0.0003554	0.1761	58240	#NUM!	0.0946	0.2818	46590	#NUM!	0.404	0.6767	84630	-1.993	0.173	0.541
Lcorl	Inh_Zfhx4	0.0009811	0.2158	57270	0.5094	0.166	0.4072	45910	0.3425	0.374	0.6689	84780	-0.1669	0.59	0.8274
Lhx4	Inh_Zfhx4	0.002283	0.2978	55490	-0.1818	0.114	0.3212	45990	-0.2785	0.669	0.8548	87380	-0.09674	0.213	0.5948
Lin28b	Inh_Zfhx4	0.1135	0.6202	67510	-0.02722	0.00114	0.01398	50950	-0.02027	0.0548	0.2608	78870	0.006949	0.135	0.5047
Mafb	Inh_Zfhx4	0.001309	0.212	58890	0.1931	0.992	0.998	47460	0.3372	0.389	0.6689	85260	0.1441	0.331	0.6822
Mbd2	Inh_Zfhx4	0.006826	0.4887	53330	0.1632	0.0363	0.1561	44960	0.06832	0.425	0.6955	88830	-0.09483	0.151	0.517
Mettl14	Inh_Zfhx4	0.01992	0.3742	59760	0.00748	0.719	0.8616	49970	-0.188	0.102	0.3874	88700	-0.1955	0.124	0.4995
Mllt10	Inh_Zfhx4	0.07877	0.5592	59020	0.001496	0.958	0.984	41800	0.02783	0.0254	0.1481	74870	0.02634	0.00756	0.09507
Mxd1	Inh_Zfhx4	0.01012	0.2685	57380	0.3944	0.339	0.599	46240	0.2379	0.704	0.8751	85220	-0.1566	0.529	0.8042
Mybl1	Inh_Zfhx4	0.01208	0.3243	61430	-0.2018	0.253	0.5072	48800	-0.2357	0.264	0.5722	84010	-0.03386	0.984	0.9912
Myc	Inh_Zfhx4	0.004385	0.2617	57690	-0.09194	0.484	0.7057	45980	-0.01352	0.595	0.8379	84390	0.07842	0.844	0.9277
Nfatc1	Inh_Zfhx4	0.0004395	0.207	56950	0.7895	0.0421	0.1721	45260	0.7773	0.0567	0.2651	84100	-0.0122	0.913	0.9662
Nfatc3	Inh_Zfhx4	0.003415	0.3952	51980	0.2209	0.00808	0.0564	44620	0.1655	0.325	0.6347	89940	-0.0554	0.0734	0.3942
Nfe2l1	Inh_Zfhx4	0.008855	0.5212	52740	0.09802	0.0207	0.1071	41420	0.1128	0.016	0.1104	83120	0.01479	0.808	0.9277
Nfia	Inh_Zfhx4	0.05776	0.3957	67100	-0.07099	0.00195	0.02126	54330	-0.09284	0.000548	0.008403	85890	-0.02186	0.568	0.8228
Nfib	Inh_Zfhx4	0.02334	0.237	59290	0.007765	0.864	0.9283	49300	-0.1812	0.18	0.4968	88010	-0.189	0.175	0.541
Nr2c2	Inh_Zfhx4	0.01476	0.5519	53040	0.08022	0.0278	0.1288	47790	-0.002645	0.627	0.8462	94050	-0.08287	0.00297	0.0517
Nr2f6	Inh_Zfhx4	0.00114	0.2132	57050	1.276	0.09	0.27	45820	1.336	0.28	0.5947	84910	0.05965	0.508	0.802
Nr3c1	Inh_Zfhx4	0.04906	0.5594	68000	-0.0573	0.00059	0.008484	47510	-9.864e-05	0.72	0.8798	71650	0.0572	0.000298	0.01374
Onecut2	Inh_Zfhx4	0.001135	0.1856	58420	0.4269	0.437	0.6749	46630	1.117	0.83	0.9137	84440	0.6902	0.524	0.8024
Otx2	Inh_Zfhx4	0.0005389	0.1823	58780	-0.4639	0.866	0.9283	46940	-0.8306	0.608	0.8447	84500	-0.3667	0.44	0.7672
Pax2	Inh_Zfhx4	0.0431	0.4953	55340	0.04904	0.182	0.4239	45690	0.0297	0.64	0.8462	87220	-0.01934	0.337	0.6822
Pax6	Inh_Zfhx4	0.01678	0.3009	59650	-0.2804	0.71	0.8582	53590	-1.445	4.4e-06	0.0001401	95600	-1.164	1.18e-06	0.0004876
Pbx1	Inh_Zfhx4	0.3064	0.602	64980	-0.04508	0.0215	0.1093	51180	-0.04261	0.0426	0.2232	83250	0.002464	0.837	0.9277
Pgr	Inh_Zfhx4	0.001463	0.1943	58410	1.541	0.429	0.6725	46120	1.63	0.249	0.5617	83530	0.08904	0.625	0.8274
Pou3f2	Inh_Zfhx4	0.0367	0.7689	66960	-0.05106	0.00233	0.02218	52690	-0.05775	0.00666	0.05514	82720	-0.006689	0.718	0.8854
Pou6f1	Inh_Zfhx4	0.001482	0.2297	56220	0.4545	0.0258	0.1223	44420	0.7385	0.02	0.1294	83600	0.284	0.835	0.9277
Pparg	Inh_Zfhx4	0.01256	0.3348	60620	0.01379	0.512	0.7287	52310	-0.1656	0.011	0.08132	89930	-0.1794	0.0779	0.3942
Prdm5	Inh_Zfhx4	0.02542	0.5704	65920	-0.1023	0.00793	0.0564	49550	-0.04083	0.198	0.508	79230	0.06149	0.165	0.534
Prrx1	Inh_Zfhx4	0.01465	0.242	57110	0.6899	0.2	0.4499	46500	0.6365	0.832	0.9137	85990	-0.05339	0.248	0.6373
Pura	Inh_Zfhx4	0.01308	0.5334	51340	0.1081	0.00445	0.03787	49290	-0.03527	0.242	0.5535	99110	-0.1434	8.25e-06	0.001141
Rad21	Inh_Zfhx4	0.002705	0.2347	54880	1.447	0.00459	0.03828	45500	0.6017	0.231	0.5481	87460	-0.8458	0.0575	0.3496
Rara	Inh_Zfhx4	0.009245	0.3821	57510	0.1573	0.578	0.7794	46860	0.06787	0.946	0.9715	85990	-0.08944	0.516	0.802
Rarb	Inh_Zfhx4	0.04342	0.4495	64840	-0.03018	0.0246	0.1179	52720	-0.04299	0.00636	0.05374	86040	-0.01281	0.539	0.8075
Rfx2	Inh_Zfhx4	0.001522	0.2155	58140	0.1205	0.432	0.6747	45690	0.3075	0.206	0.5187	83130	0.1869	0.533	0.8044
Rfx3	Inh_Zfhx4	0.01642	0.5585	49240	0.08603	0.00028	0.004491	43760	0.02814	0.178	0.4946	91910	-0.05789	0.0192	0.1937
Rfxap	Inh_Zfhx4	0.004317	0.3352	59870	-0.0353	0.655	0.8252	48310	-0.04618	0.385	0.6689	85370	-0.01088	0.613	0.8274
Rorb	Inh_Zfhx4	0.004339	0.2494	59400	0.04966	0.729	0.8647	48000	-0.1444	0.282	0.5947	85510	-0.194	0.392	0.723
Runx1	Inh_Zfhx4	0.01152	0.2934	60330	-0.3457	0.413	0.6614	49240	-0.735	0.076	0.3211	86470	-0.3892	0.245	0.6373
Smad1	Inh_Zfhx4	0.005837	0.3677	56770	0.3314	0.395	0.649	45290	0.3076	0.484	0.7495	84420	-0.02383	0.883	0.9493
Smad3	Inh_Zfhx4	0.01595	0.2488	58480	0.02222	0.851	0.9217	47980	-0.1599	0.462	0.7356	86780	-0.1822	0.288	0.6531
Sox10	Inh_Zfhx4	0.009685	0.436	48370	0.3382	7.45e-05	0.001608	42250	0.9033	0.0422	0.2232	89780	0.565	0.0864	0.4217
Sox11	Inh_Zfhx4	0.003585	0.273	57210	0.3938	0.334	0.5927	46830	-0.01996	0.934	0.9705	86510	-0.4138	0.243	0.6373
Sox2	Inh_Zfhx4	0.05836	0.5568	61350	-0.01949	0.352	0.6065	43150	0.04655	0.105	0.3916	74110	0.06604	0.0038	0.05841
Sox4	Inh_Zfhx4	0.002897	0.279	61280	-0.7116	0.118	0.3259	44820	0.1055	0.197	0.508	77090	0.817	0.00117	0.03237
Sox5	Inh_Zfhx4	0.003217	0.4695	55890	0.1884	0.256	0.5099	45090	0.3767	0.453	0.7297	85030	0.1883	0.749	0.8996
Sox6	Inh_Zfhx4	0.01112	0.4415	62210	-0.138	0.208	0.4541	45890	0.1116	0.706	0.8751	78260	0.2496	0.093	0.4337
Sox8	Inh_Zfhx4	0.0162	0.5113	60140	0.004703	0.635	0.8173	44360	0.117	0.283	0.5947	77920	0.1123	0.076	0.3942
Sox9	Inh_Zfhx4	0.003669	0.3	54870	0.7438	0.0348	0.1512	45490	0.3364	0.41	0.679	87500	-0.4074	0.149	0.517
Sp4	Inh_Zfhx4	0.01743	0.5709	55480	0.04116	0.2	0.4499	45720	0.01552	0.65	0.8462	86820	-0.02564	0.398	0.7263
Spdef	Inh_Zfhx4	0.0004963	0.1751	58850	2.774	0.929	0.9706	46520	3.117	0.507	0.755	83630	0.3429	0.482	0.7906
Spi1	Inh_Zfhx4	0.009932	0.4834	55690	0.1855	0.23	0.4725	43640	0.1776	0.162	0.4686	83280	-0.007909	0.844	0.9277
Stat2	Inh_Zfhx4	0.0001609	0.1748	59080	2.99	0.556	0.7627	46830	0.8158	0.727	0.8798	83860	-2.174	0.821	0.9277
Stat6	Inh_Zfhx4	0.001673	0.2103	60290	-0.9829	0.166	0.4072	48030	-0.6296	0.114	0.414	84340	0.3533	0.741	0.8992
Taf1	Inh_Zfhx4	0.01013	0.5165	49490	0.2688	0.000399	0.005942	46700	0.01487	0.994	0.9964	96900	-0.254	0.00014	0.01162
Taf6	Inh_Zfhx4	0.005296	0.4384	53220	0.4335	0.0326	0.1446	46450	0.2166	0.902	0.9544	91090	-0.2168	0.0354	0.2825
Tcf12	Inh_Zfhx4	0.07151	0.5496	65890	-0.03019	0.00822	0.0564	45620	0.005135	0.617	0.8462	72080	0.03532	0.00048	0.01781
Tcf7l2	Inh_Zfhx4	0.00532	0.3379	52900	0.4362	0.0224	0.1125	45670	0.2979	0.628	0.8462	90210	-0.1382	0.0615	0.3496
Tfap2b	Inh_Zfhx4	0.01598	0.262	60110	-0.173	0.545	0.7594	48600	-0.3346	0.26	0.5722	85630	-0.1616	0.512	0.802
Tfcp2	Inh_Zfhx4	0.003824	0.2686	58230	0.2784	0.732	0.8647	47550	0.05533	0.587	0.8294	86220	-0.223	0.346	0.6937
Tfdp1	Inh_Zfhx4	0.005605	0.4086	56930	0.1125	0.437	0.6749	46790	0.1041	0.973	0.9883	86740	-0.008312	0.385	0.7197
Tfdp2	Inh_Zfhx4	0.04166	0.5656	58090	0.003954	0.765	0.8774	45410	0.00669	0.552	0.7963	82790	0.002736	0.734	0.8957
Tfeb	Inh_Zfhx4	0.02138	0.4823	60460	-0.02521	0.55	0.7594	44440	0.1015	0.3	0.6059	77550	0.1267	0.0592	0.3496
Thrb	Inh_Zfhx4	0.09191	0.472	65010	-0.02377	0.0208	0.1071	50820	-0.02515	0.0624	0.2808	81770	-0.001379	0.521	0.8023
Trps1	Inh_Zfhx4	0.06474	0.5554	63780	-0.09488	0.0646	0.219	51030	-0.1435	0.05	0.2435	84770	-0.0486	0.81	0.9277
Uncx	Inh_Zfhx4	0.001607	0.2002	57960	1.77	0.236	0.4801	46600	1.004	0.83	0.9137	85040	-0.7664	0.271	0.6531
Usf2	Inh_Zfhx4	0.0006967	0.1808	59520	-1.054	0.213	0.4551	47380	-1.391	0.104	0.3914	84220	-0.3375	0.592	0.8274
Zbtb18	Inh_Zfhx4	0.0002753	0.172	58750	#NUM!	0.457	0.683	46340	#NUM!	0.147	0.4503	83440	2.32	0.215	0.5948
Zbtb24	Inh_Zfhx4	0.0003838	0.1773	59440	-1.211	0.102	0.2995	46500	0.06794	0.634	0.8462	82760	1.278	0.0271	0.249
Zbtb40	Inh_Zfhx4	0.004005	0.3005	60450	-0.2899	0.449	0.678	47800	-0.1605	0.53	0.7726	83760	0.1295	0.941	0.97
Zeb1	Inh_Zfhx4	0.0475	0.5182	63900	-0.1193	0.0585	0.2067	46570	0.02317	0.945	0.9715	76520	0.1425	0.0288	0.249
Zfhx2	Inh_Zfhx4	0.07517	0.5578	64760	-0.04016	0.0266	0.1246	48870	-0.01076	0.328	0.6375	79670	0.0294	0.208	0.5948
Zfp13	Inh_Zfhx4	0.006719	0.2643	58420	0.2479	0.768	0.8774	45570	0.2439	0.39	0.6689	82590	-0.00398	0.511	0.802
Zfp148	Inh_Zfhx4	0.06676	0.5593	58450	-0.0003246	0.872	0.9324	46440	-0.004379	0.899	0.9544	84160	-0.004054	0.951	0.9745
Zfp2	Inh_Zfhx4	0.004364	0.4019	61690	-0.005261	0.285	0.5277	46170	0.0787	0.801	0.9101	79110	0.08396	0.15	0.517
Zfp266	Inh_Zfhx4	0.00857	0.5024	48350	0.2405	7.21e-05	0.001608	43020	0.09338	0.0927	0.3621	92810	-0.1471	0.00914	0.1054
Zfp280d	Inh_Zfhx4	0.08035	0.5693	58650	-0.002751	0.931	0.9706	46080	-0.002618	0.772	0.8926	83160	0.0001332	0.815	0.9277
Zfp354c	Inh_Zfhx4	0.004057	0.2328	56730	0.8893	0.0895	0.27	45920	0.1467	0.406	0.6767	85580	-0.7425	0.328	0.6822
Zfp398	Inh_Zfhx4	0.0328	0.3566	60040	-0.1462	0.643	0.8188	48810	-0.1995	0.31	0.6141	86140	-0.05337	0.491	0.7946
Zfp407	Inh_Zfhx4	0.007752	0.2884	57930	0.2988	0.625	0.8119	46750	0.09155	0.987	0.9942	85310	-0.2073	0.586	0.8274
Zfp449	Inh_Zfhx4	0.002287	0.2214	60890	-0.8987	0.0742	0.2436	47140	-0.0978	0.687	0.8684	81850	0.8009	0.142	0.5169
Zfp467	Inh_Zfhx4	0.0005138	0.1766	58370	#NUM!	0.135	0.3522	46460	#NUM!	0.237	0.5481	84220	-0.3867	0.59	0.8274
Zfp507	Inh_Zfhx4	0.003369	0.2158	59430	0.08789	0.615	0.8039	48180	-1.235	0.0743	0.3204	85750	-1.323	0.15	0.517
Zfp553	Inh_Zfhx4	0.1117	0.5986	67720	-0.2328	0.000865	0.01127	54370	-0.2391	0.000505	0.008041	85350	-0.006218	0.681	0.8641
Zfp652	Inh_Zfhx4	0.003888	0.2505	56070	0.6852	0.0566	0.2035	43550	0.9576	0.0124	0.09006	82290	0.2724	0.421	0.7435
Zfp738	Inh_Zfhx4	0.01716	0.5278	55930	0.07035	0.266	0.5099	45100	0.03397	0.46	0.7353	85690	-0.03638	0.61	0.8274
Zfp777	Inh_Zfhx4	0.00471	0.2806	54010	0.7729	0.00825	0.0564	46260	-0.1226	0.74	0.8841	90150	-0.8955	0.00844	0.103
Zfp81	Inh_Zfhx4	0.007245	0.253	58020	0.1538	0.547	0.7594	44570	0.7273	0.0884	0.3553	81260	0.5735	0.171	0.541
Zfp944	Inh_Zfhx4	0.001827	0.2281	57100	1.018	0.128	0.34	46650	0.32	0.936	0.9705	86370	-0.6984	0.103	0.4543
Zfp993	Inh_Zfhx4	0.002878	0.2477	57830	-0.0993	0.48	0.7023	47340	-0.3268	0.586	0.8294	86580	-0.2275	0.157	0.5288
Zscan12	Inh_Zfhx4	0.0003065	0.1875	59500	-1.173	0.296	0.5414	47180	-0.9493	0.363	0.662	83900	0.2242	0.938	0.97
Zscan18	Inh_Zfhx4	0.02032	0.5429	63560	-0.08775	0.0778	0.2535	47170	0.004336	0.838	0.9154	78310	0.09209	0.0971	0.4413
Ahdc1	Inh_Kit	0.002517	0.2252	39340	0.4175	0.669	0.8328	35780	0.6803	0.479	0.7495	27960	0.2628	0.779	0.9144
Alx4	Inh_Kit	0.004445	0.2202	38670	1.114	0.186	0.4262	35840	-0.1372	0.485	0.7495	28520	-1.251	0.561	0.8228
Arid3a	Inh_Kit	0.006921	0.4241	45610	-0.2553	0.00225	0.02218	43840	-0.4203	3.67e-05	0.0007275	29740	-0.1649	0.286	0.6531
Atf2	Inh_Kit	0.009815	0.3953	40850	-0.1009	0.522	0.7379	36120	0.01982	0.91	0.9562	27150	0.1208	0.479	0.7905
Bach2	Inh_Kit	0.06527	0.381	32420	0.05562	0.000181	0.003145	28980	0.05926	5.61e-05	0.001056	27870	0.003642	0.853	0.9291
Bclaf1	Inh_Kit	0.04615	0.4752	42260	-0.04025	0.183	0.4239	37880	-0.0271	0.39	0.6689	27540	0.01315	0.685	0.8641
Bhlhe22	Inh_Kit	0.006784	0.2624	38160	-0.02889	0.141	0.3585	35290	-0.2342	0.281	0.5947	28460	-0.2053	0.719	0.8854
Bptf	Inh_Kit	0.02929	0.4864	45370	-0.1286	0.00337	0.03055	40110	-0.1206	0.0373	0.2059	26900	0.007966	0.404	0.729
Brf1	Inh_Kit	0.002992	0.1882	39570	0.5947	0.751	0.8767	35700	1.614	0.123	0.4352	27740	1.019	0.253	0.6373
Ccnt2	Inh_Kit	0.02872	0.4167	37500	0.1343	0.259	0.5099	35740	0.06117	0.75	0.8897	29290	-0.07317	0.446	0.7712
Cebpb	Inh_Kit	0.003146	0.4203	40380	0.1023	0.716	0.8616	39000	-0.2315	0.141	0.4488	29670	-0.3338	0.309	0.661
Cic	Inh_Kit	0.03029	0.3198	35450	0.373	0.0153	0.08622	29260	0.5616	2.44e-05	0.0005317	25900	0.1886	0.11	0.4749
Clock	Inh_Kit	0.02721	0.4936	32800	0.05903	0.000391	0.005942	35260	0.01758	0.563	0.8093	32390	-0.04145	0.00456	0.06526
Creb1	Inh_Kit	0.01042	0.3915	42110	-0.1104	0.211	0.4551	42160	-0.2055	0.00134	0.01632	31270	-0.09515	0.0369	0.2889
Cux1	Inh_Kit	0.01727	0.4467	38620	0.04774	0.585	0.7794	39020	-0.08583	0.139	0.4488	30840	-0.1336	0.0715	0.3942
E2f3	Inh_Kit	0.01002	0.4365	38030	0.1443	0.394	0.649	37000	-0.02962	0.709	0.8762	29710	-0.1739	0.294	0.6531
Ebf1	Inh_Kit	0.0047	0.2265	34660	0.3658	0.00612	0.0464	31950	0.4706	0.0105	0.07979	28150	0.1048	1	1
Ep300	Inh_Kit	0.001174	0.2022	40610	-2.481	0.143	0.3614	36920	-1.334	0.331	0.6403	27950	1.147	0.647	0.8444
Erf	Inh_Kit	0.003221	0.2776	40260	-0.07192	0.645	0.8188	38010	-0.5989	0.14	0.4488	29030	-0.527	0.334	0.6822
Ets1	Inh_Kit	0.002471	0.2912	39980	0.1397	0.834	0.9137	36430	0.1743	0.936	0.9705	28050	0.03451	0.927	0.9676
Etv1	Inh_Kit	0.01141	0.5016	45900	-0.2218	0.00134	0.01552	44090	-0.2851	2.01e-05	0.0004646	30130	-0.06332	0.186	0.5593
Etv3	Inh_Kit	0.006072	0.3188	41260	-0.5264	0.284	0.5277	38310	-0.5217	0.148	0.4503	28620	0.004777	0.668	0.8609
Etv4	Inh_Kit	0.02134	0.3982	47350	-0.3438	7.71e-05	0.001608	47270	-0.5766	1.81e-09	7.493e-08	31100	-0.2329	0.0484	0.3348
Etv5	Inh_Kit	0.04865	0.4622	37530	0.03571	0.268	0.5099	35020	0.01298	0.477	0.7495	28720	-0.02273	0.701	0.8736
Etv6	Inh_Kit	0.01979	0.5469	37680	0.0405	0.303	0.5518	34370	0.04933	0.285	0.5959	28140	0.008836	0.999	1
Fli1	Inh_Kit	0.02225	0.4657	44650	-0.07877	0.0104	0.06473	38110	-0.03009	0.325	0.6347	26070	0.04868	0.164	0.534
Fosl2	Inh_Kit	0.01955	0.4827	28680	0.6299	9.59e-09	4.999e-07	24230	0.7227	1.95e-11	1.346e-09	26460	0.09277	0.258	0.6373
Foxj3	Inh_Kit	0.004973	0.3278	38100	-0.06052	0.342	0.6017	36800	-0.2779	0.756	0.8917	29780	-0.2173	0.206	0.5948
Foxo1	Inh_Kit	0.002934	0.3574	37520	0.2991	0.204	0.4499	36680	-0.1103	0.817	0.9137	29950	-0.4094	0.166	0.534
Foxo3	Inh_Kit	0.01162	0.2825	40690	-0.2039	0.414	0.6614	35770	0.1157	0.648	0.8462	26990	0.3197	0.23	0.628
Gabpa	Inh_Kit	0.00182	0.2499	38240	0.5276	0.204	0.4499	36310	0.01502	0.994	0.9964	29170	-0.5126	0.248	0.6373
Gatad2a	Inh_Kit	0.002301	0.1937	39050	1.627	0.175	0.4194	34860	2.153	0.00594	0.05232	27460	0.5262	0.176	0.541
Glis1	Inh_Kit	0.001393	0.2478	40170	0.07559	0.646	0.8188	36880	-0.01772	0.576	0.8223	28240	-0.09331	0.909	0.9662
Gtf2ird1	Inh_Kit	0.06041	0.5317	44320	-0.099	0.0168	0.09218	31110	0.08243	0.0042	0.04219	21090	0.1814	2.35e-06	0.0004876
Hes5	Inh_Kit	0.001517	0.2163	40340	-0.5727	0.351	0.6065	35870	-0.09261	0.543	0.786	27330	0.4801	0.15	0.517
Hey2	Inh_Kit	0.07028	0.4715	56020	-1.345	1.19e-17	1.654e-15	50950	-1.402	4.18e-16	8.653e-14	27080	-0.05666	0.457	0.7824
Hltf	Inh_Kit	0.06676	0.4927	38940	0.007349	0.703	0.8558	28410	0.08788	1.4e-05	0.00037	22710	0.08053	0.000276	0.01374
Hmbox1	Inh_Kit	0.02069	0.3535	38080	0.1794	0.368	0.6264	37070	-0.1836	0.649	0.8462	29890	-0.363	0.201	0.5948
Hmga2	Inh_Kit	0.08602	0.6701	31990	0.2271	7.42e-05	0.001608	24720	0.3617	1.92e-10	1.136e-08	23770	0.1346	0.00337	0.05379
Hsf1	Inh_Kit	0.001618	0.3092	38380	-0.06716	0.393	0.649	35420	-0.04221	0.526	0.7722	28380	0.02495	0.85	0.9291
Ikzf1	Inh_Kit	0.00426	0.4371	37540	0.06984	0.269	0.5099	38660	-0.07708	0.199	0.508	31390	-0.1469	0.0299	0.2514
Ikzf2	Inh_Kit	0.002868	0.3427	35360	0.09449	0.0182	0.09856	34180	0.1699	0.208	0.5187	29400	0.07545	0.381	0.7197
Ikzf5	Inh_Kit	0.002017	0.2605	41950	-0.1752	0.0557	0.202	35820	0.0841	0.679	0.8649	26170	0.2593	0.0309	0.2514
Irf8	Inh_Kit	0.001502	0.3352	42280	-0.1655	0.149	0.3743	39010	-0.03372	0.11	0.4066	28490	0.1317	0.801	0.9277
Irx5	Inh_Kit	0.01902	0.3817	40800	-0.04917	0.508	0.728	38060	-0.2754	0.269	0.577	28650	-0.2263	0.693	0.8689
Jund	Inh_Kit	0.003446	0.2878	40780	-0.4938	0.436	0.6749	38280	-0.2433	0.131	0.4479	28890	0.2505	0.471	0.7882
Klf13	Inh_Kit	0.01454	0.4912	39010	0.03495	0.728	0.8647	36950	-0.06157	0.731	0.8798	29220	-0.09652	0.475	0.7902
Klf2	Inh_Kit	0.0007587	0.2463	41070	-0.776	0.229	0.4725	35530	-0.1783	0.498	0.755	26530	0.5977	0.0753	0.3942
Klf7	Inh_Kit	0.02073	0.4496	35720	0.08784	0.0415	0.1713	33320	0.06673	0.0991	0.381	28620	-0.02111	0.75	0.8996
Kmt2b	Inh_Kit	0.0004835	0.1782	39610	-0.3271	0.802	0.8942	36230	0.2486	0.731	0.8798	28130	0.5757	0.928	0.9676
Lcorl	Inh_Kit	0.002587	0.2613	39380	0.05348	0.799	0.8933	36630	-0.6105	0.774	0.8926	28610	-0.6639	0.604	0.8274
Lhx4	Inh_Kit	0.004139	0.3699	39060	0.2404	0.722	0.8627	36660	0.003085	0.836	0.9154	28830	-0.2373	0.613	0.8274
Lin28b	Inh_Kit	0.07065	0.4105	33890	0.05885	0.00283	0.02622	30320	0.05256	0.000988	0.01278	28240	-0.006292	0.95	0.9745
Mafb	Inh_Kit	0.001015	0.2515	42160	-1.18	0.0836	0.2602	38310	-1.143	0.14	0.4488	27940	0.0363	0.842	0.9277
Mbd2	Inh_Kit	0.008097	0.4628	35480	0.1868	0.0302	0.1384	38240	-0.09116	0.293	0.6059	32620	-0.278	0.00277	0.0517
Mettl14	Inh_Kit	0.02091	0.3537	38690	0.05742	0.583	0.7794	38240	-0.2869	0.251	0.5617	30430	-0.3443	0.0984	0.4413
Mllt10	Inh_Kit	0.07825	0.473	41250	-0.01283	0.418	0.665	31120	0.03723	0.00428	0.04219	22960	0.05005	0.000515	0.01781
Mlx	Inh_Kit	8.669e-05	0.1718	39930	#NUM!	0.214	0.4551	36550	#NUM!	0.234	0.5481
Mxd1	Inh_Kit	0.00932	0.2487	37410	0.4531	0.0445	0.1771	35400	0.3336	0.362	0.662	29030	-0.1195	0.336	0.6822
Mybl1	Inh_Kit	0.0201	0.389	46430	-0.6354	0.000145	0.002629	37470	-0.1376	0.503	0.755	24010	0.4978	0.00223	0.04407
Myc	Inh_Kit	0.007792	0.2997	40600	-0.2147	0.537	0.754	38030	-0.5707	0.216	0.5291	28800	-0.356	0.554	0.8211
Nfatc1	Inh_Kit	0.0006855	0.2198	40060	-0.9019	0.675	0.8352	37470	-0.4698	0.146	0.4503	28790	0.4321	0.299	0.6531
Nfatc3	Inh_Kit	0.004863	0.4162	37720	0.1436	0.307	0.5566	37770	-0.03764	0.422	0.6949	30770	-0.1812	0.0761	0.3942
Nfe2l1	Inh_Kit	0.009483	0.4605	41310	-0.008519	0.4	0.649	39320	-0.1051	0.0994	0.381	29310	-0.09654	0.436	0.7635
Nfia	Inh_Kit	0.194	0.638	56380	-0.2176	7.52e-18	1.568e-15	47530	-0.1621	7.45e-10	3.427e-08	23980	0.05553	0.00524	0.07249
Nfib	Inh_Kit	0.2911	0.7508	34640	0.09384	0.00935	0.06092	29380	0.1567	0.000139	0.002398	26010	0.06288	0.152	0.517
Nr2c2	Inh_Kit	0.01497	0.4723	40180	-0.02225	0.797	0.8933	38200	-0.05729	0.303	0.608	29450	-0.03504	0.385	0.7197
Nr2f6	Inh_Kit	0.003115	0.2546	39080	0.8517	0.558	0.7629	35680	0.7893	0.506	0.755	28060	-0.06239	0.91	0.9662
Nr3c1	Inh_Kit	0.04466	0.4493	54670	-0.2847	1.09e-14	9.091e-13	51480	-0.3221	8.67e-17	3.589e-14	29510	-0.03743	0.363	0.7073
Onecut2	Inh_Kit	0.00236	0.2151	40460	0.245	0.312	0.5632	37220	0.7266	0.211	0.5231	28280	0.4816	0.793	0.927
Otx2	Inh_Kit	0.003092	0.2323	40640	-0.3428	0.264	0.5099	37640	-0.6326	0.0911	0.362	28500	-0.2898	0.535	0.8044
Pax2	Inh_Kit	0.06141	0.5084	33290	0.1096	0.000994	0.01256	30990	0.1068	0.00342	0.0354	28520	-0.002841	0.806	0.9277
Pax6	Inh_Kit	0.01564	0.2669	38330	0.298	0.328	0.587	39530	-0.9591	0.00535	0.05151	31570	-1.257	0.000442	0.01781
Pbx1	Inh_Kit	0.2204	0.4286	45690	-0.1017	0.00194	0.02126	40980	-0.08388	0.0106	0.07979	27350	0.0178	0.594	0.8274
Pgr	Inh_Kit	7.169e-05	0.171	39930	#NUM!	0.214	0.4551	36390	0.2478	0.779	0.8958	28020	#NUM!	0.298	0.6531
Pou3f2	Inh_Kit	0.006535	0.2815	36360	0.1282	0.0866	0.2655	36270	-0.00521	0.979	0.991	30580	-0.1334	0.104	0.4543
Pou6f1	Inh_Kit	0.00191	0.2385	38110	0.8033	0.112	0.3199	35200	0.1551	0.219	0.5326	28410	-0.6482	0.749	0.8996
Pparg	Inh_Kit	0.05978	0.6565	54970	-0.3736	3.17e-15	3.305e-13	48970	-0.3309	3.76e-12	3.892e-10	27320	0.0427	0.578	0.8274
Prdm5	Inh_Kit	0.01979	0.4222	47430	-0.2473	6.53e-05	0.001608	45620	-0.3179	3.28e-07	1.132e-05	29750	-0.07067	0.284	0.6531
Prrx1	Inh_Kit	0.02065	0.2482	35960	0.994	0.000738	0.009927	37020	-0.49	0.391	0.6689	31300	-1.484	0.000186	0.01286
Pura	Inh_Kit	0.01478	0.4846	34910	0.11	0.0139	0.0805	38470	-0.04852	0.237	0.5481	33080	-0.1585	0.000955	0.02831
Rad21	Inh_Kit	0.005312	0.2798	39110	0.1857	0.655	0.8252	36280	0.2061	0.974	0.9883	28500	0.02031	0.717	0.8854
Rara	Inh_Kit	0.01119	0.3787	39960	-0.08452	0.881	0.9348	38680	-0.2551	0.169	0.4755	29880	-0.1705	0.219	0.6019
Rarb	Inh_Kit	0.09735	0.5839	58720	-0.3022	9.81e-23	4.091e-20	50810	-0.2561	1.81e-15	2.498e-13	24870	0.0461	0.0283	0.249
Rfx2	Inh_Kit	0.001116	0.1943	39590	-0.05245	0.859	0.9256	36000	0.5787	0.515	0.7615	27960	0.6312	0.655	0.8495
Rfx3	Inh_Kit	0.01639	0.4733	37560	0.04377	0.275	0.5166	36730	0.004974	0.822	0.9137	29840	-0.03879	0.256	0.6373
Rfxap	Inh_Kit	0.005231	0.3369	40940	-0.3295	0.46	0.6841	38130	-0.2239	0.251	0.5617	28700	0.1057	0.671	0.8621
Rorb	Inh_Kit	0.005962	0.257	40350	-0.8701	0.564	0.7686	37150	-1.038	0.442	0.7148	28320	-0.1678	0.841	0.9277
Runx1	Inh_Kit	0.006841	0.2317	40500	-0.1751	0.413	0.6614	36680	-0.2202	0.704	0.8751	27840	-0.04509	0.68	0.8641
Smad1	Inh_Kit	0.007925	0.3897	42220	-0.2356	0.172	0.417	38950	-0.2145	0.132	0.4479	28460	0.02108	0.825	0.9277
Smad3	Inh_Kit	0.1065	0.5218	51540	-0.8546	7.02e-10	4.182e-08	45970	-0.7463	9.34e-08	3.515e-06	26810	0.1083	0.362	0.7073
Sox10	Inh_Kit	0.01193	0.4555	34760	0.2108	0.0111	0.06708	34970	0.09998	0.459	0.7353	30700	-0.1109	0.0882	0.4217
Sox11	Inh_Kit	0.004122	0.2828	41560	-0.5743	0.167	0.4072	36000	0.06561	0.809	0.9101	26550	0.6399	0.128	0.4995
Sox2	Inh_Kit	0.05553	0.4613	35920	0.04414	0.0525	0.195	31340	0.07824	0.00625	0.05374	26880	0.0341	0.396	0.7263
Sox4	Inh_Kit	0.001775	0.2354	39450	0.1363	0.836	0.9137	37600	-0.7711	0.2	0.508	29280	-0.9074	0.168	0.5363
Sox5	Inh_Kit	0.002346	0.3388	37490	0.2045	0.245	0.4936	37900	-0.3959	0.37	0.6689	31060	-0.6004	0.0437	0.3262
Sox6	Inh_Kit	0.014	0.4378	45650	-0.3814	0.00209	0.02126	43830	-0.4988	3.69e-05	0.0007275	29700	-0.1174	0.299	0.6531
Sox8	Inh_Kit	0.02125	0.5081	47050	-0.1437	0.000145	0.002629	44080	-0.1615	2.02e-05	0.0004646	28900	-0.01775	0.617	0.8274
Sox9	Inh_Kit	0.002946	0.2639	39020	0.703	0.625	0.8119	38650	-0.1143	0.0496	0.2435	30350	-0.8173	0.024	0.2316
Sp4	Inh_Kit	0.01517	0.4486	36680	0.1044	0.122	0.3325	37190	-0.003011	0.635	0.8462	30780	-0.1074	0.0779	0.3942
Spdef	Inh_Kit	0.002423	0.2119	39540	-0.3261	0.841	0.9157	36530	-1.028	0.728	0.8798	28410	-0.7016	0.604	0.8274
Spi1	Inh_Kit	0.01476	0.521	40080	-0.02986	0.837	0.9137	35590	0.0002099	0.688	0.8684	27260	0.03007	0.553	0.8211
Stat2	Inh_Kit	0.000249	0.1734	40050	#NUM!	0.127	0.3395	36660	#NUM!	0.144	0.4503
Stat6	Inh_Kit	0.002692	0.2432	41170	-0.1756	0.18	0.4239	39690	-1.722	0.000436	0.00722	29650	-1.546	0.0282	0.249
Taf1	Inh_Kit	0.01137	0.4786	40920	0.0188	0.524	0.7382	40850	-0.1388	0.0129	0.09208	30870	-0.1576	0.0686	0.3847
Taf6	Inh_Kit	0.006128	0.4166	38190	0.02929	0.442	0.6776	38530	-0.295	0.224	0.536	30990	-0.3243	0.0566	0.3496
Tcf12	Inh_Kit	0.07654	0.4833	39530	-0.0006013	0.939	0.9716	31280	0.03548	0.00566	0.05207	24640	0.03608	0.0188	0.1937
Tcf7l2	Inh_Kit	0.01412	0.4904	42840	-0.3946	0.103	0.3004	41890	-0.6417	0.00223	0.02562	30400	-0.2471	0.132	0.5026
Tfap2b	Inh_Kit	0.0643	0.4357	49340	-0.7655	2.72e-07	1.134e-05	47340	-0.9603	2.81e-10	1.454e-08	30470	-0.1948	0.0922	0.4337
Tfcp2	Inh_Kit	0.01038	0.3851	44200	-0.6815	0.00872	0.05831	38770	-0.4195	0.135	0.4488	26660	0.2619	0.255	0.6373
Tfdp1	Inh_Kit	0.004806	0.3347	41990	-0.1362	0.201	0.4499	42890	-0.5137	6.67e-05	0.001201	31730	-0.3775	0.00673	0.08728
Tfdp2	Inh_Kit	0.04011	0.4696	30830	0.09747	5.06e-06	0.0001758	28210	0.1063	8.4e-06	0.0002484	28100	0.00882	0.977	0.9865
Tfeb	Inh_Kit	0.02167	0.4208	36760	0.2111	0.131	0.3457	30810	0.2781	0.00239	0.02604	26130	0.06704	0.176	0.541
Thrb	Inh_Kit	0.1728	0.5566	29160	0.1689	5.8e-08	2.687e-06	23790	0.2244	6.11e-12	5.059e-10	25280	0.05552	0.0551	0.3496
Trps1	Inh_Kit	0.05148	0.4249	44670	-0.2055	0.0101	0.06381	36710	-0.0554	0.83	0.9137	25150	0.1501	0.0448	0.3262
Uncx	Inh_Kit	0.0008483	0.1911	39310	0.04756	0.461	0.6841	35880	1.286	0.355	0.6617	28060	1.238	0.845	0.9277
Usf2	Inh_Kit	0.001327	0.1927	40400	-0.3478	0.184	0.4239	37400	-1.406	0.0192	0.1262	28480	-1.058	0.214	0.5948
Zbtb18	Inh_Kit	0.003753	0.217	41480	-1.569	0.0106	0.065	37440	-1.3	0.112	0.4103	27730	0.2689	0.322	0.6818
Zbtb24	Inh_Kit	0.002675	0.2305	41380	-0.9833	0.0458	0.1802	37530	-0.169	0.142	0.4488	27880	0.8143	0.634	0.8326
Zbtb40	Inh_Kit	0.006599	0.3435	37890	0.2343	0.282	0.5273	35780	-0.06641	0.726	0.8798	29080	-0.3008	0.47	0.7882
Zeb1	Inh_Kit	0.04786	0.4311	45130	-0.2275	0.00484	0.03957	41350	-0.2612	0.00559	0.05207	28160	-0.03368	0.995	0.9998
Zfhx2	Inh_Kit	0.07342	0.4682	42860	-0.0314	0.101	0.2987	37930	-0.01618	0.378	0.6689	26860	0.01523	0.389	0.723
Zfp13	Inh_Kit	0.008262	0.2656	39640	0.09667	0.975	0.9916	35950	-0.1283	0.749	0.8897	27910	-0.225	0.799	0.9277
Zfp148	Inh_Kit	0.06811	0.4793	34040	0.03802	0.00365	0.03238	31530	0.03011	0.00853	0.06791	28420	-0.00791	0.858	0.9321
Zfp2	Inh_Kit	0.007182	0.3988	39150	0.1444	0.782	0.8861	34210	0.03107	0.241	0.5535	26960	-0.1134	0.419	0.7431
Zfp266	Inh_Kit	0.01077	0.4929	34250	0.17	0.00511	0.04021	34420	0.06868	0.298	0.6059	30530	-0.1013	0.111	0.4749
Zfp280d	Inh_Kit	0.07552	0.4668	32290	0.05579	0.00014	0.002629	28420	0.06723	1.43e-05	0.00037	27140	0.01144	0.501	0.802
Zfp354c	Inh_Kit	0.00462	0.2338	40460	-0.9938	0.4	0.649	36000	-0.2055	0.734	0.8808	27310	0.7883	0.247	0.6373
Zfp398	Inh_Kit	0.05669	0.4165	36750	0.1251	0.12	0.3292	35130	0.005406	0.499	0.755	29340	-0.1197	0.416	0.7409
Zfp407	Inh_Kit	0.01239	0.3253	44830	-0.7581	0.00119	0.01418	40920	-0.9126	0.00229	0.02562	27880	-0.1545	0.816	0.9277
Zfp449	Inh_Kit	0.001676	0.1995	39390	0.2502	0.608	0.7998	34860	0.8047	0.0208	0.1311	27220	0.5545	0.0952	0.439
Zfp467	Inh_Kit	0.0002756	0.1744	39480	-1.307	0.424	0.6672	36270	0.9382	0.807	0.9101	28250	2.245	0.621	0.8274
Zfp507	Inh_Kit	0.003297	0.2092	38980	1.165	0.347	0.6065	36130	0.7372	0.773	0.8926	28490	-0.4274	0.564	0.8228
Zfp553	Inh_Kit	0.04761	0.3168	36130	0.2124	0.0606	0.2106	32160	0.186	0.0192	0.1262	27420	-0.02635	0.62	0.8274
Zfp652	Inh_Kit	0.00694	0.2935	38870	0.274	0.555	0.7627	36950	-0.4701	0.614	0.8462	29220	-0.7441	0.304	0.6571
Zfp738	Inh_Kit	0.01997	0.4883	40780	-0.01482	0.571	0.7731	37910	-0.03866	0.383	0.6689	28630	-0.02384	0.745	0.8996
Zfp777	Inh_Kit	0.006031	0.2849	39260	0.03023	0.764	0.8774	38030	-0.2886	0.17	0.4755	29740	-0.3188	0.122	0.4995
Zfp81	Inh_Kit	0.01014	0.2726	41410	-0.2083	0.163	0.4046	37550	-0.4242	0.3	0.6059	27840	-0.2159	0.736	0.8957
Zfp944	Inh_Kit	0.001058	0.2067	38710	0.3339	0.203	0.4499	36170	-0.9469	0.824	0.9137	28740	-1.281	0.336	0.6822
Zfp993	Inh_Kit	0.004151	0.261	39340	-0.06381	0.78	0.8861	38190	-0.8338	0.0793	0.3316	29860	-0.77	0.0522	0.3496
Zscan12	Inh_Kit	0.0003006	0.1824	39650	1.947	0.952	0.9802	36730	-2.995	0.214	0.5274	28480	-4.942	0.21	0.5948
Zscan18	Inh_Kit	0.01585	0.4142	39630	-0.03245	0.981	0.9929	38250	-0.07877	0.289	0.6012	29780	-0.04632	0.274	0.6531
Ahdc1	Inh_Piezo2	0.0005357	0.174	546	#NUM!	0.109	0.3135					560	#NUM!	0.129	0.4995
Alx4	Inh_Piezo2	0.00328	0.1852	565.5	#NUM!	0.267	0.5099	624	#NUM!	0.0661	0.2911	497	2.107	0.385	0.7197
Arid3a	Inh_Piezo2	0.01093	0.2503	594.5	0.3109	0.913	0.9639	811	-0.3572	0.166	0.474	632	-0.6681	0.161	0.534
Atf2	Inh_Piezo2	0.006827	0.2118	587	0.03629	0.984	0.9935	707	-0.1778	0.772	0.8926	544.5	-0.2141	0.78	0.9144
Bach2	Inh_Piezo2	0.08699	0.2232	648	-0.03473	0.452	0.678	562	0.06124	0.195	0.508	394	0.09596	0.086	0.4217
Bclaf1	Inh_Piezo2	0.05454	0.2416	730	-0.126	0.0802	0.2553	694	0.02801	0.906	0.9544	414	0.154	0.147	0.517
Bhlhe22	Inh_Piezo2	0.001854	0.1771	600	#NUM!	0.397	0.649	680	1.395	0.939	0.9705	510	#NUM!	0.371	0.7128
Bptf	Inh_Piezo2	0.03018	0.237	649	-0.06495	0.445	0.678	662	0.06215	0.83	0.9137	451	0.1271	0.336	0.6822
Ccnt2	Inh_Piezo2	0.03532	0.2359	397	0.5479	0.0232	0.1152	689	-0.001608	0.948	0.9715	676	-0.5495	0.0476	0.3348
Cebpb	Inh_Piezo2	0.001583	0.2041	576	0.296	0.918	0.9667	599	0.6674	0.368	0.6682	475	0.3714	0.515	0.802
Cic	Inh_Piezo2	0.07648	0.258	746.5	-0.5091	0.051	0.1916	727.5	-0.1224	0.63	0.8462	429	0.3867	0.205	0.5948
Clock	Inh_Piezo2	0.02391	0.2296	428	0.1044	0.0578	0.206	555	0.07636	0.17	0.4755	553	-0.02802	0.719	0.8854
Creb1	Inh_Piezo2	0.01573	0.2328	290	0.6873	0.00026	0.004337	694	0.04225	0.906	0.9544	765	-0.6451	0.00134	0.03476
Cux1	Inh_Piezo2	0.009963	0.2057	633	-0.1584	0.568	0.7715	746	-0.1701	0.497	0.755	521	-0.01166	0.964	0.9829
E2f3	Inh_Piezo2	0.008831	0.2245	628.5	0.07867	0.603	0.7957	651.5	0.3192	0.741	0.8841	456.5	0.2405	0.371	0.7128
Ebf1	Inh_Piezo2	0.01258	0.1974	617	-0.186	0.699	0.8558	726	-0.2434	0.638	0.8462	516	-0.05734	0.909	0.9662
Ep300	Inh_Piezo2	0.0003379	0.1725	565.5	#NUM!	0.267	0.5099					542.5	#NUM!	0.294	0.6531
Erf	Inh_Piezo2	0.001078	0.1839	505	1.606	0.049	0.1892	661	1.204	0.506	0.755	582.5	-0.4024	0.163	0.534
Ets1	Inh_Piezo2	0.001271	0.1899	617	-0.7539	0.55	0.7594	722	-1.97	0.511	0.7583	527	-1.216	0.974	0.9859
Etv1	Inh_Piezo2	0.009495	0.2323	423	0.4315	0.0502	0.1903	762	-0.01258	0.395	0.6702	722	-0.4441	0.00907	0.1054
Etv3	Inh_Piezo2	0.001225	0.1792	568	2.77	0.683	0.8426	694	1.319	0.784	0.8991	549.5	-1.451	0.494	0.7946
Etv4	Inh_Piezo2	0.09152	0.3167	745	-0.4726	0.0531	0.195	929	-0.7435	0.00721	0.05853	574	-0.2709	0.526	0.8025
Etv5	Inh_Piezo2	0.05807	0.2392	507	-0.002062	0.351	0.6065	719	-0.1362	0.698	0.873	604	-0.1341	0.304	0.6571
Etv6	Inh_Piezo2	0.01238	0.2233	531	0.06898	0.52	0.7376	624	0.1213	0.532	0.7728	518	0.05231	0.932	0.9694
Fli1	Inh_Piezo2	0.03387	0.2546	709	-0.06109	0.136	0.3522	769	-0.02424	0.354	0.6617	482	0.03684	0.578	0.8274
Fosl2	Inh_Piezo2	0.0204	0.249	524.5	0.164	0.467	0.6906	542.5	0.3235	0.13	0.4479	493.5	0.1595	0.683	0.8641
Foxj3	Inh_Piezo2	0.002411	0.1944	432.5	1.414	0.0239	0.1173	705.5	-0.1144	0.721	0.8798	669.5	-1.528	0.0184	0.1937
Foxo1	Inh_Piezo2	0.001736	0.2019	612	0.697	0.664	0.8315	649.5	0.897	0.653	0.8473	481.5	0.1999	0.454	0.7818
Foxo3	Inh_Piezo2	0.002985	0.1786	562	-0.9272	0.441	0.6776	660	1.697	0.486	0.7495	528	2.624	0.937	0.97
Gabpa	Inh_Piezo2	0.0002088	0.1728	577	-0.8353	0.823	0.9137	717.5	#NUM!	0.184	0.4979	560	#NUM!	0.129	0.4995
Gatad2a	Inh_Piezo2	0.002751	0.1818	594.5	0.04894	0.758	0.8767	717.5	#NUM!	0.184	0.4979	542.5	#NUM!	0.294	0.6531
Glis1	Inh_Piezo2	0.00132	0.1925	618.5	-2.516	0.495	0.7167	725	-0.9917	0.423	0.6949	529	1.525	0.927	0.9676
Gtf2ird1	Inh_Piezo2	0.03793	0.2206	624	-0.04666	0.643	0.8188	699	0.03155	0.863	0.9377	501	0.0782	0.759	0.9049
Hes5	Inh_Piezo2	0.0006243	0.1792	615	#NUM!	0.219	0.4587	698	-2.018	0.635	0.8462	510	#NUM!	0.371	0.7128
Hey2	Inh_Piezo2	0.02407	0.2041	737	-0.8045	0.0602	0.2106	978.5	-1.5	0.000761	0.01086	617.5	-0.6955	0.18	0.5453
Hltf	Inh_Piezo2	0.06703	0.2365	631	-0.02385	0.584	0.7794	522	0.07899	0.0832	0.3377	367	0.1028	0.0376	0.289
Hmbox1	Inh_Piezo2	0.0189	0.2166	711.5	-0.6724	0.108	0.3128	847	-0.6841	0.0577	0.2654	546	-0.01168	0.761	0.9049
Hmga2	Inh_Piezo2	0.04434	0.2303	436	0.2604	0.0721	0.2386	382	0.5054	0.000958	0.01278	395	0.245	0.0884	0.4217
Hsf1	Inh_Piezo2	0.0008805	0.1944	624	-0.5116	0.507	0.728	741	-0.3758	0.358	0.6617	537	0.1358	0.81	0.9277
Ikzf1	Inh_Piezo2	0.00305	0.2114	334	1.472	0.00209	0.02126	463	0.5052	0.0171	0.1161	613	-0.9663	0.251	0.6373
Ikzf2	Inh_Piezo2	0.0006913	0.1808	481	0.8075	0.124	0.3358	711	1.837	0.666	0.8536	633	1.029	0.0729	0.3942
Ikzf5	Inh_Piezo2	0.003655	0.2252	548	0.5987	0.55	0.7594	549.5	0.6406	0.0759	0.3211	459	0.04193	0.307	0.6601
Irf8	Inh_Piezo2	0.0009469	0.1997	361	2.132	0.00234	0.02218	666.5	-0.1199	0.83	0.9137	727	-2.252	0.00333	0.05379
Irx5	Inh_Piezo2	0.005008	0.1865	528	1.98	0.219	0.4587	621	0.5798	0.245	0.5573	535.5	-1.4	0.84	0.9277
Jund	Inh_Piezo2	0.000896	0.181	534	2.88	0.211	0.4551	615	3.829	0.153	0.459	515	0.9499	0.835	0.9277
Klf13	Inh_Piezo2	0.01015	0.2203	421	0.4022	0.0473	0.1843	667	0.1961	0.872	0.9426	644	-0.2061	0.119	0.498
Klf2	Inh_Piezo2	0.003041	0.1994	496	4.999	0.0802	0.2553	639	1.382	0.388	0.6689	573	-3.616	0.356	0.7002
Klf7	Inh_Piezo2	0.01921	0.2238	473	0.1176	0.178	0.4217	476	0.2952	0.0251	0.1481	468	0.1776	0.46	0.7824
Kmt2b	Inh_Piezo2	0.002303	0.1797	565.5	#NUM!	0.267	0.5099					542.5	#NUM!	0.294	0.6531
Lcorl	Inh_Piezo2	0.001011	0.1799	556.5	0.7042	0.451	0.678	717.5	#NUM!	0.184	0.4979	577.5	#NUM!	0.0598	0.3496
Lhx4	Inh_Piezo2	0.001465	0.1897	498	-0.1649	0.136	0.3522	631	0.7248	0.39	0.6689	559	0.8897	0.56	0.8228
Lin28b	Inh_Piezo2	0.1152	0.2424	800	-0.07717	0.00881	0.05831	905	-0.06768	0.0156	0.1095	503	0.009494	0.779	0.9144
Mafb	Inh_Piezo2	0.001138	0.1926	571	0.7045	0.738	0.8669	660	-0.4411	0.639	0.8462	521.5	-1.146	0.942	0.97
Mbd2	Inh_Piezo2	0.006506	0.2223	485	0.4997	0.23	0.4725	675	0.1376	0.94	0.9705	622	-0.3621	0.206	0.5948
Mettl14	Inh_Piezo2	0.01411	0.2006	612.5	-0.217	0.704	0.8558	769	-1.265	0.269	0.577	568	-1.048	0.494	0.7946
Mllt10	Inh_Piezo2	0.09342	0.2415	643	-0.03182	0.489	0.7105	565	0.04514	0.207	0.5187	412	0.07697	0.14	0.5142
Mlx	Inh_Piezo2	0.0003746	0.1807	600	#NUM!	0.397	0.649	700	#NUM!	0.357	0.6617
Mxd1	Inh_Piezo2	0.005421	0.1867	565	1.169	0.671	0.8328	713.5	-0.8516	0.485	0.7495	566	-2.02	0.289	0.6531
Mybl1	Inh_Piezo2	0.01245	0.2083	726	-0.825	0.0533	0.195	812	-0.7703	0.119	0.4247	490	0.05472	0.579	0.8274
Myc	Inh_Piezo2	0.01415	0.2519	722.5	-1.161	0.0692	0.2327	831	-0.8888	0.0739	0.3204	529	0.2725	0.956	0.9772
Nfatc1	Inh_Piezo2	0.002798	0.2032	520	5.635	0.0824	0.2602	661	1.704	0.506	0.755	567	-3.93	0.277	0.6531
Nfatc3	Inh_Piezo2	0.002667	0.2066	464	0.5725	0.138	0.353	659	0.03528	0.797	0.909	604	-0.5372	0.296	0.6531
Nfe2l1	Inh_Piezo2	0.008221	0.2248	473	0.4386	0.178	0.4217	813	-0.297	0.16	0.4686	718	-0.7357	0.0106	0.1158
Nfia	Inh_Piezo2	0.09769	0.2244	747	-0.2074	0.0502	0.1903	747	-0.0443	0.491	0.7529	435	0.1631	0.241	0.6373
Nfib	Inh_Piezo2	0.1004	0.2175	794	-0.3144	0.0116	0.0691	890.5	-0.3139	0.0247	0.1481	487.5	0.0004686	0.626	0.8274
Nr2c2	Inh_Piezo2	0.01438	0.2299	496	0.08469	0.286	0.5277	562	0.2427	0.195	0.508	513	0.1581	0.881	0.9493
Nr2f6	Inh_Piezo2	0.0009795	0.1795	507	#NUM!	0.0206	0.1071	663	#NUM!	0.304	0.608	581	-4.202	0.114	0.4828
Nr3c1	Inh_Piezo2	0.08573	0.2656	797	-0.3153	0.00983	0.06306	920	-0.3875	0.00972	0.07593	552	-0.07223	0.729	0.8924
Otx2	Inh_Piezo2	0.0008982	0.1814	561	1.697	0.421	0.665	680	0.4188	0.939	0.9705	545	-1.279	0.48	0.7905
Pax2	Inh_Piezo2	0.09282	0.2675	696	-0.08391	0.182	0.4239	812	-0.09659	0.163	0.4686	538	-0.01269	0.87	0.9427
Pax6	Inh_Piezo2	0.02527	0.221	483	0.9966	0.137	0.3526	781.5	-1.315	0.119	0.4247	683	-2.312	0.00612	0.08193
Pbx1	Inh_Piezo2	0.276	0.2333	755	-0.173	0.0396	0.1651	981	-0.2274	0.00104	0.01305	613	-0.05443	0.251	0.6373
Pou3f2	Inh_Piezo2	0.009029	0.1972	387	0.5858	0.0161	0.08952	495	0.3147	0.0424	0.2232	588	-0.2711	0.413	0.7388
Pou6f1	Inh_Piezo2	0.001603	0.1947	462	4.006	0.00765	0.0564	660	2.077	0.486	0.7495	616.5	-1.928	0.0461	0.3299
Pparg	Inh_Piezo2	0.03056	0.2277	730	-0.2988	0.0802	0.2553	869	-0.3337	0.0436	0.2256	528	-0.03486	0.974	0.9859
Prdm5	Inh_Piezo2	0.03254	0.2492	819	-0.417	0.00423	0.03675	935	-0.336	0.00588	0.05232	490	0.08099	0.652	0.8482
Prrx1	Inh_Piezo2	0.001006	0.1701	561	2.07	0.421	0.665	700	#NUM!	0.357	0.6617	560	#NUM!	0.129	0.4995
Pura	Inh_Piezo2	0.01556	0.2375	539	-0.04794	0.584	0.7794	812	-0.2782	0.163	0.4686	668	-0.2302	0.0604	0.3496
Rad21	Inh_Piezo2	0.00328	0.1863	507	#NUM!	0.0206	0.1071	643.5	#NUM!	0.138	0.4488	568	-3.276	0.265	0.6431
Rara	Inh_Piezo2	0.01008	0.2191	652	-0.2596	0.399	0.649	831	-0.5853	0.0918	0.362	562	-0.3256	0.601	0.8274
Rarb	Inh_Piezo2	0.06137	0.2288	734	-0.1144	0.0721	0.2386	729	-0.02499	0.62	0.8462	438	0.08937	0.257	0.6373
Rfx2	Inh_Piezo2	0.001064	0.1853	596.5	-3.037	0.706	0.8558	680.5	-0.783	0.967	0.9881	511.5	2.254	0.638	0.8352
Rfx3	Inh_Piezo2	0.01342	0.223	419	0.2558	0.0446	0.1771	600	0.0712	0.377	0.6689	636	-0.1846	0.147	0.517
Rfxap	Inh_Piezo2	0.004904	0.2106	557	0.1486	0.702	0.8558	774.5	-0.486	0.22	0.5326	622	-0.6346	0.12	0.498
Rorb	Inh_Piezo2	0.002651	0.1829	611	-2.106	0.446	0.678	676	-0.3935	0.891	0.9544	498	1.713	0.403	0.729
Runx1	Inh_Piezo2	0.005057	0.1873	549.5	0.6159	0.469	0.6911	697	-0.6618	0.765	0.8926	566	-1.278	0.35	0.695
Smad1	Inh_Piezo2	0.004199	0.2035	614	0.08084	0.718	0.8616	770	-0.2248	0.317	0.6249	566	-0.3057	0.562	0.8228
Smad3	Inh_Piezo2	0.08003	0.2441	724.5	-0.4075	0.09	0.27	788	-0.2597	0.254	0.5654	465	0.1479	0.429	0.7544
Sox10	Inh_Piezo2	0.01231	0.2302	611	-0.4153	0.759	0.8767	673	0.5494	0.923	0.9674	481	0.9646	0.569	0.8228
Sox11	Inh_Piezo2	0.001337	0.1811	516.5	2.304	0.116	0.3246	677.5	1.446	0.901	0.9544	580.5	-0.8584	0.179	0.5453
Sox2	Inh_Piezo2	0.08288	0.2524	756	-0.159	0.0385	0.1622	787	-0.03345	0.262	0.5722	452	0.1256	0.342	0.689
Sox4	Inh_Piezo2	0.002284	0.2006	530	1.469	0.235	0.4801	574	2.187	0.0588	0.2675	490.5	0.7184	0.522	0.8023
Sox5	Inh_Piezo2	0.001467	0.1955	426	1.634	0.0309	0.1401	606	0.7356	0.34	0.6517	614	-0.8986	0.208	0.5948
Sox6	Inh_Piezo2	0.007269	0.2064	751	-0.6548	0.0443	0.1771	804	-0.4484	0.19	0.508	471.5	0.2064	0.484	0.7908
Sox8	Inh_Piezo2	0.01629	0.2265	567	0.02992	0.833	0.9137	594	0.1536	0.343	0.6544	469	0.1236	0.468	0.7882
Sox9	Inh_Piezo2	0.0006089	0.1749	543	0.4312	0.215	0.4551	662	-3.018	0.526	0.7722	550.5	-3.45	0.476	0.7902
Sp4	Inh_Piezo2	0.0134	0.2222	431	0.2608	0.0629	0.215	552	0.1576	0.16	0.4686	591	-0.1031	0.391	0.723
Spi1	Inh_Piezo2	0.01022	0.2243	408	0.2638	0.032	0.1435	646	0.1301	0.697	0.873	639	-0.1337	0.135	0.5047
Stat2	Inh_Piezo2	0.0007524	0.1788	565.5	#NUM!	0.267	0.5099					542.5	#NUM!	0.294	0.6531
Stat6	Inh_Piezo2	0.004307	0.2071	579	0.9313	0.909	0.9621	731	-1.256	0.306	0.6091	567	-2.187	0.277	0.6531
Taf1	Inh_Piezo2	0.007742	0.2166	334	0.5513	0.00209	0.02126	604	0.2172	0.401	0.6767	656	-0.334	0.086	0.4217
Taf6	Inh_Piezo2	0.008131	0.2449	572	0.1546	0.881	0.9348	863.5	-0.5645	0.0506	0.2436	668	-0.7191	0.0607	0.3496
Tcf12	Inh_Piezo2	0.086	0.2405	916	-0.1412	3.53e-05	0.001051	670	0.02754	0.897	0.9544	256	0.1688	0.000293	0.01374
Tcf7l2	Inh_Piezo2	0.007092	0.2115	629	0.011	0.596	0.7903	884	-1.148	0.0271	0.1558	639	-1.159	0.128	0.4995
Tfap2b	Inh_Piezo2	0.119	0.3048	812	-0.5111	0.00605	0.0464	972	-0.4577	0.00174	0.02058	555	0.05339	0.697	0.8712
Tfcp2	Inh_Piezo2	0.008408	0.2211	591.5	-0.1175	0.929	0.9706	565.5	0.7468	0.148	0.4503	430.5	0.8643	0.158	0.5288
Tfdp1	Inh_Piezo2	0.001987	0.1883	526	0.9754	0.377	0.6365	682.5	0.5932	1	1	576	-0.3822	0.399	0.7263
Tfdp2	Inh_Piezo2	0.04137	0.233	567	0.02654	0.833	0.9137	631	0.02007	0.583	0.8294	506	-0.006464	0.809	0.9277
Tfeb	Inh_Piezo2	0.02641	0.2377	586	-0.1345	0.995	0.998	579	0.179	0.264	0.5722	444	0.3135	0.289	0.6531
Thrb	Inh_Piezo2	0.1419	0.2383	679	-0.07405	0.26	0.5099	605	0.03206	0.407	0.6767	379	0.1061	0.0551	0.3496
Trps1	Inh_Piezo2	0.0324	0.2056	590.5	0.06916	0.952	0.9802	711	-0.06684	0.762	0.8926	547	-0.136	0.777	0.9144
Zbtb18	Inh_Piezo2	0.00143	0.1803	565.5	#NUM!	0.267	0.5099	643.5	#NUM!	0.138	0.4488	513.5	-0.1966	0.691	0.8689
Zbtb24	Inh_Piezo2	0.002767	0.1928	574	2.941	0.754	0.8767	697	2.236	0.657	0.8473	544	-0.7055	0.503	0.802
Zbtb40	Inh_Piezo2	0.002205	0.187	587	0.602	0.978	0.9923	719	0.1082	0.529	0.7726	550.5	-0.4938	0.584	0.8274
Zeb1	Inh_Piezo2	0.03736	0.2155	510	0.2712	0.362	0.6187	498	0.4556	0.045	0.23	458.5	0.1844	0.384	0.7197
Zfhx2	Inh_Piezo2	0.09628	0.246	522	0.01265	0.452	0.678	546	0.07642	0.142	0.4488	493	0.06377	0.681	0.8641
Zfp13	Inh_Piezo2	0.009615	0.2056	475.5	3.035	0.0242	0.1173	578	2.858	0.0473	0.2388	541	-0.1763	0.777	0.9144
Zfp148	Inh_Piezo2	0.06598	0.2316	756	-0.101	0.0385	0.1622	602	0.004665	0.389	0.6689	302	0.1057	0.00299	0.0517
Zfp2	Inh_Piezo2	0.002877	0.2	511	1.108	0.357	0.6126	524	0.5983	0.0811	0.3358	487	-0.5094	0.616	0.8274
Zfp266	Inh_Piezo2	0.007773	0.2218	479	0.2543	0.203	0.4499	685	0.01755	0.983	0.9926	651	-0.2367	0.0989	0.4413
Zfp280d	Inh_Piezo2	0.08174	0.2347	673	-0.05497	0.292	0.5364	707	-0.001592	0.796	0.909	454	0.05338	0.356	0.7002
Zfp354c	Inh_Piezo2	0.001467	0.1785	630	#NUM!	0.127	0.3395	693	1.04	0.804	0.9101	495	#NUM!	0.194	0.5792
Zfp398	Inh_Piezo2	0.0998	0.2754	581.5	0.01752	0.971	0.99	712	-0.06416	0.753	0.8907	571	-0.08168	0.549	0.8196
Zfp407	Inh_Piezo2	0.01402	0.2247	562	0.948	0.757	0.8767	669	0.2786	0.872	0.9426	541	-0.6693	0.816	0.9277
Zfp449	Inh_Piezo2	0.0191	0.3049	604.5	-0.5074	0.778	0.8861	654.5	0.2805	0.72	0.8798	483.5	0.7879	0.516	0.802
Zfp507	Inh_Piezo2	0.005925	0.1972	576	0.6956	0.799	0.8933	661	-0.4398	0.601	0.8406	518	-1.135	0.853	0.9291
Zfp553	Inh_Piezo2	0.132	0.2504	676	-0.3972	0.273	0.5151	611	0.2413	0.442	0.7148	381	0.6385	0.0589	0.3496
Zfp652	Inh_Piezo2	0.003632	0.1899	539.5	1.949	0.352	0.6065	732	-0.8792	0.223	0.536	599	-2.828	0.0541	0.3496
Zfp738	Inh_Piezo2	0.01672	0.227	551	0.08419	0.687	0.8451	843	-0.228	0.0832	0.3377	678	-0.3122	0.0442	0.3262
Zfp777	Inh_Piezo2	0.001558	0.1787	535	3.074	0.22	0.4587	676.5	2.195	0.879	0.9477	563	-0.8791	0.326	0.6822
Zfp81	Inh_Piezo2	0.002313	0.1769	595.5	-0.7608	0.732	0.8647	677.5	1.114	0.901	0.9544	512.5	1.875	0.664	0.8584
Zfp944	Inh_Piezo2	0.000467	0.175	580	1.97	0.851	0.9217	681	-3.315	0.969	0.9881	528	-5.286	0.912	0.9662
Zfp993	Inh_Piezo2	0.002053	0.1868	587.5	-0.4344	0.963	0.9842	735	-2.827	0.196	0.508	563	-2.392	0.236	0.6373
Zscan18	Inh_Piezo2	0.01888	0.2307	610	-0.00527	0.768	0.8774	639	0.1586	0.643	0.8462	453	0.1639	0.349	0.695
Mlx	Inh_Zfhx4	9.873e-06	0.169					46590	#NUM!	0.404	0.6767	83720	#NUM!	0.263	0.6431
