# Supplementary material for: Region- and cell type-specific changes in gene expression in the cerebellum after classical fear conditioning
Source: Research Square preprint supplement (doi:10.21203/rs.3.rs-6469280/v1), 2025-05-07
Supplement: Supplementary file 4 [file 4e959503b04a126fb100e89c.xlsx]

## Sheet: Overview
Table S1: Fisher's test of cell type abundance score
Column	Description
spatial_clusters	spatial cluster number
ref_celltype	Reference cell type from Allen Brain Atlas
OR	odd ratio
pvalue	p-value
padj	adjusted p-value using Benjamini Hochberg method

## Sheet: S1
spatial_clusters	ref_celltype	OR	pvalue	padj
1	169 IC Tfap2d Maf Glut	0.4826	0.9915	1
2	169 IC Tfap2d Maf Glut	0.1641	0.9998	1
3	169 IC Tfap2d Maf Glut	0.4688	0.9749	1
4	169 IC Tfap2d Maf Glut	0.5921	0.9272	1
5	169 IC Tfap2d Maf Glut	0.9355	0.625	1
9	169 IC Tfap2d Maf Glut	14.31	1.284e-18	1.541e-17
1	189 CBN Glut	0	1	1
2	189 CBN Glut	0	1	1
3	189 CBN Glut	Inf	1.682e-46	1.211e-44
4	189 CBN Glut	0	1	1
5	189 CBN Glut	0	1	1
9	189 CBN Glut	0	1	1
1	207 IC Six3 En2 Gaba	0.08218	1	1
2	207 IC Six3 En2 Gaba	0	1	1
3	207 IC Six3 En2 Gaba	2.879	0.0002461	0.001266
4	207 IC Six3 En2 Gaba	0	1	1
5	207 IC Six3 En2 Gaba	0	1	1
9	207 IC Six3 En2 Gaba	23.85	1.775e-27	3.651e-26
1	220 CBN Dmbx1 Gaba	0	1	1
2	220 CBN Dmbx1 Gaba	0	1	1
3	220 CBN Dmbx1 Gaba	303.1	5.207e-44	1.5e-42
4	220 CBN Dmbx1 Gaba	0	1	1
5	220 CBN Dmbx1 Gaba	0	1	1
9	220 CBN Dmbx1 Gaba	0.2482	0.9808	1
1	265 CB PLI Gly-Gaba	0.04034	1	1
2	265 CB PLI Gly-Gaba	0	1	1
3	265 CB PLI Gly-Gaba	45.78	1.544e-34	3.705e-33
4	265 CB PLI Gly-Gaba	0	1	1
5	265 CB PLI Gly-Gaba	0.5025	0.9499	1
9	265 CB PLI Gly-Gaba	0.2482	0.9808	1
1	266 CBX Golgi Gly-Gaba	0.5427	0.9805	1
2	266 CBX Golgi Gly-Gaba	1.941	0.02022	0.08563
3	266 CBX Golgi Gly-Gaba	0.5741	0.9379	1
4	266 CBX Golgi Gly-Gaba	1.349	0.2234	0.7846
5	266 CBX Golgi Gly-Gaba	1.427	0.2004	0.7216
9	266 CBX Golgi Gly-Gaba	0.5067	0.9017	1
1	267 CBX MLI Megf11 Gaba	6.248	2.747e-11	2.082e-10
2	267 CBX MLI Megf11 Gaba	0	1	1
3	267 CBX MLI Megf11 Gaba	0	1	1
4	267 CBX MLI Megf11 Gaba	0	1	1
5	267 CBX MLI Megf11 Gaba	1.792	0.0599	0.227
9	267 CBX MLI Megf11 Gaba	1.057	0.5329	1
1	268 CBX MLI Cdh22 Gaba	2.354	0.001055	0.005239
2	268 CBX MLI Cdh22 Gaba	0	1	1
3	268 CBX MLI Cdh22 Gaba	0	1	1
4	268 CBX MLI Cdh22 Gaba	0	1	1
5	268 CBX MLI Cdh22 Gaba	0	1	1
9	268 CBX MLI Cdh22 Gaba	15.38	8.619e-20	1.332e-18
1	269 CB Granule Glut	1.05	0.4823	1
2	269 CB Granule Glut	2.286	0.003966	0.01842
3	269 CB Granule Glut	0	1	1
4	269 CB Granule Glut	0.8232	0.7475	1
5	269 CB Granule Glut	1.792	0.0599	0.227
9	269 CB Granule Glut	0.2482	0.9808	1
1	270 DCO UBC Glut	1.23	0.2699	0.9255
2	270 DCO UBC Glut	0.08053	1	1
3	270 DCO UBC Glut	0.1768	0.9997	1
4	270 DCO UBC Glut	0.3791	0.99	1
5	270 DCO UBC Glut	0	1	1
9	270 DCO UBC Glut	17.77	3.142e-22	5.656e-21
1	281 CBX Purkinje Gaba	0	1	1
2	281 CBX Purkinje Gaba	0	1	1
3	281 CBX Purkinje Gaba	0	1	1
4	281 CBX Purkinje Gaba	0	1	1
5	281 CBX Purkinje Gaba	135.2	2.542e-46	1.22e-44
9	281 CBX Purkinje Gaba	0.7762	0.7424	1
1	284 Bergmann NN	0.08218	1	1
2	284 Bergmann NN	0	1	1
3	284 Bergmann NN	0	1	1
4	284 Bergmann NN	0	1	1
5	284 Bergmann NN	12.61	9.25e-20	1.332e-18
9	284 Bergmann NN	7.268	1.833e-09	1.32e-08
1	285 Astro-CB NN	0	1	1
2	285 Astro-CB NN	0	1	1
3	285 Astro-CB NN	0	1	1
4	285 Astro-CB NN	313	1.161e-44	4.18e-43
5	285 Astro-CB NN	0.1184	0.9997	1
9	285 Astro-CB NN	0	1	1
1	286 Astro-NT NN	0	1	1
2	286 Astro-NT NN	0	1	1
3	286 Astro-NT NN	Inf	1.682e-46	1.211e-44
4	286 Astro-NT NN	0	1	1
5	286 Astro-NT NN	0	1	1
9	286 Astro-NT NN	0	1	1
1	291 Ependymal NN	0	1	1
2	291 Ependymal NN	0	1	1
3	291 Ependymal NN	6.8	3.207e-12	2.566e-11
4	291 Ependymal NN	0	1	1
5	291 Ependymal NN	0	1	1
9	291 Ependymal NN	11.51	2.777e-15	2.666e-14
1	293 CHOR NN	0.1256	1	1
2	293 CHOR NN	0	1	1
3	293 CHOR NN	4.452	9.587e-08	6.002e-07
4	293 CHOR NN	0	1	1
5	293 CHOR NN	0.1184	0.9997	1
9	293 CHOR NN	13.31	1.782e-17	1.974e-16
1	294 OPC NN	0.08218	1	1
2	294 OPC NN	0	1	1
3	294 OPC NN	7.308	4.526e-13	3.834e-12
4	294 OPC NN	2.346	0.003653	0.01754
5	294 OPC NN	0.5025	0.9499	1
9	294 OPC NN	0	1	1
1	295 Oligo NN	0	1	1
2	295 Oligo NN	0	1	1
3	295 Oligo NN	2.274	0.004841	0.02179
4	295 Oligo NN	11.93	2.999e-19	3.926e-18
5	295 Oligo NN	0	1	1
9	295 Oligo NN	0	1	1
1	298 VLMC NN	2.905	5.317e-05	0.0002836
2	298 VLMC NN	0	1	1
3	298 VLMC NN	0.08674	1	1
4	298 VLMC NN	0	1	1
5	298 VLMC NN	0	1	1
9	298 VLMC NN	11.51	2.777e-15	2.666e-14
1	299 Peri NN	0.37	0.9989	1
2	299 Peri NN	0	1	1
3	299 Peri NN	4.452	9.587e-08	6.002e-07
4	299 Peri NN	1.075	0.4732	1
5	299 Peri NN	0.9355	0.625	1
9	299 Peri NN	1.656	0.1773	0.6548
1	300 SMC NN	4.176	9.509e-08	6.002e-07
2	300 SMC NN	0	1	1
3	300 SMC NN	1.042	0.5082	1
4	300 SMC NN	0.08945	1	1
5	300 SMC NN	0.1184	0.9997	1
9	300 SMC NN	2.66	0.01229	0.05363
1	301 Endo NN	1.05	0.4823	1
2	301 Endo NN	0	1	1
3	301 Endo NN	3.342	2.368e-05	0.0001312
4	301 Endo NN	0.8232	0.7475	1
5	301 Endo NN	0.1184	0.9997	1
9	301 Endo NN	2.31	0.03394	0.1396
1	302 Microglia NN	0.04034	1	1
2	302 Microglia NN	0	1	1
3	302 Microglia NN	3.342	2.368e-05	0.0001312
4	302 Microglia NN	7.543	2.096e-13	1.886e-12
5	302 Microglia NN	0	1	1
9	302 Microglia NN	0	1	1
1	303 BAM NN	1.05	0.4823	1
2	303 BAM NN	0	1	1
3	303 BAM NN	0.4688	0.9749	1
4	303 BAM NN	1.811	0.04039	0.1616
5	303 BAM NN	0.6409	0.8802	1
9	303 BAM NN	5.142	2.938e-06	1.763e-05
