# Supplementary material for: Region- and cell type-specific changes in gene expression in the cerebellum after classical fear conditioning
Source: Research Square preprint supplement (doi:10.21203/rs.3.rs-6469280/v1), 2025-05-07
Supplement: Supplementary file 6 [file 5127e3022d0b770d06274b35.xlsx]

## Sheet: Overview
Table S2
TableS2a: Vermis vs hemisphere DEGs
Column	Description
Gene	gene symbol
baseMean	average of the normalized count values, dividing by size factors, taken over all samples
log2FoldChange	log2(fold change)
lfcSE	standard error estimate of log2FoldChange
pvalue	p-value
padj	adjusted p-value using the Benjamini and Hochberg method
Direction	direction which the gene is differentially expressed in
TableS2b: Region specific DEGs
Column	Description
Gene	gene symbol
Region	subregion in Purkinje layer
LRT_gene	significance for likelihood ratio test (LRT) across conditions
baseMean	average of the normalized count values, dividing by size factors, taken over all samples
log2FoldChange_CD_vs_HC	log2(fold change) for CD vs HC comparison
lfcSE_CD_vs_HC	standard error estimate of log2FoldChange for CD vs HC comparison
pvalue_CD_vs_HC	p-value for CD vs HC comparison
padj_CD_vs_HC	adjusted p-value using the Benjamini and Hochberg method for CD vs HC comparison
Direction_CD_vs_HC	direction which the gene is differentially expressed in the CD vs HC comparison
log2FoldChange_TN_vs_HC	log2(fold change) for TN vs HC comparison
lfcSE_TN_vs_HC	standard error estimate of log2FoldChange for TN vs HC comparison
pvalue_TN_vs_HC	p-value for TN vs HC comparison
padj_TN_vs_HC	adjusted p-value using the Benjamini and Hochberg method for TN vs HC comparison
Direction_TN_vs_HC	direction which the gene is differentially expressed in the TN vs HC comparison
log2FoldChange_TN_vs_CD	log2(fold change) for TN vs CD comparison
lfcSE_TN_vs_CD	standard error estimate of log2FoldChange for TN vs CD comparison
pvalue_TN_vs_CD	p-value for TN vs CD comparison
padj_TN_vs_CD	adjusted p-value using the Benjamini and Hochberg method for TN vs CD comparison
Direction_TN_vs_CD	direction which the gene is differentially expressed in the TN vs CD comparison

## Sheet: S2a
gene	baseMean	log2FoldChange	lfcSE	pvalue	padj	Direction
AI593442	37.29	-0.6833	0.1972	2.302e-05	0.006903	Hemisphere up
Aldoc	3013	-0.8718	0.09103	1.428e-15	3.168e-12	Hemisphere up
Alpk2	10.58	1.277	0.4174	0.000106	0.02507	Vermis up
Atp2a2	1189	0.2766	0.04973	4.203e-08	2.753e-05	Vermis up
Cabp7	54.18	-0.8173	0.1645	7.721e-07	0.000185	Hemisphere up
Calb1	1748	0.1873	0.05091	0.0005007	0.04223	Vermis up
Calm2	1422	0.2818	0.042	2.814e-10	2.905e-07	Vermis up
Car7	104.3	-0.976	0.1192	2.067e-13	2.395e-10	Hemisphere up
Car8	2458	0.406	0.04992	2.807e-07	0.0001007	Vermis up
Ccdc136	38.56	-0.7186	0.1912	7.595e-06	0.00277	Hemisphere up
Cck	229.3	0.7952	0.09909	4.911e-06	0.0009632	Vermis up
Cds1	156.1	0.3675	0.1039	2.644e-05	0.00757	Vermis up
Chn1	165.9	0.3312	0.09889	4.951e-05	0.01288	Vermis up
Cox5a	564	0.2	0.05562	3.152e-05	0.008856	Vermis up
Cpne9	55.65	-1.54	0.2085	1.593e-08	8.059e-06	Hemisphere up
Cux2	13.34	-1.046	0.3346	4.904e-05	0.01288	Hemisphere up
Dusp5	40.9	-0.5488	0.1932	0.0001661	0.03669	Hemisphere up
Epha5	11.42	-1.138	0.3801	0.0001007	0.02398	Hemisphere up
Fxyd6	31.45	-1.188	0.2086	1.038e-09	9.804e-07	Hemisphere up
Fxyd7	35.45	-0.6891	0.2026	2.745e-05	0.008022	Hemisphere up
Garnl3	192.9	0.4388	0.08865	7.836e-08	5.116e-05	Vermis up
Gng13	1724	-0.2924	0.04703	1.102e-06	0.0002794	Hemisphere up
Hpca	63.94	-0.698	0.1541	9.32e-07	0.0003157	Hemisphere up
Icmt	407.9	0.3366	0.06575	8.88e-08	5.652e-05	Vermis up
Kcnab1	176.3	0.5515	0.09227	3.857e-10	3.781e-07	Vermis up
Kcnc3	338.5	0.2637	0.07269	2.368e-05	0.00683	Vermis up
Kcng4	114.3	0.7173	0.124	2.588e-07	7.007e-05	Vermis up
Kcnip1	117.3	0.6381	0.1132	2.528e-09	2.185e-06	Vermis up
Kctd12	162.3	-1.488	0.1367	3.453e-14	7.416e-11	Hemisphere up
Kitl	183.4	0.2965	0.09555	0.0001225	0.02739	Vermis up
Mt1	3450	0.1369	0.03785	0.0002712	0.03172	Vermis up
Muc3a	25.36	0.8253	0.256	5.946e-05	0.01517	Vermis up
Nefh	122.8	0.4362	0.113	9.473e-05	0.008718	Vermis up
Nptn	657.4	0.3505	0.05316	1.053e-10	1.08e-07	Vermis up
Nsg2	48.19	-1.268	0.1672	3.139e-15	6.636e-12	Hemisphere up
Paxbp1	141.7	0.4718	0.1115	1.725e-06	0.0007856	Vermis up
Pcp2	2567	0.1616	0.03839	3.054e-05	0.007303	Vermis up
Pde1b	15.2	-0.9419	0.2977	3.782e-05	0.01028	Hemisphere up
Pde5a	99.05	0.4451	0.1249	0.0001086	0.01207	Vermis up
Pebp1	571.4	0.2401	0.05538	2.513e-06	0.001017	Vermis up
Pigs	84.23	-0.4569	0.1332	2.895e-05	0.00826	Hemisphere up
Plcb4	196.1	0.4398	0.09025	2.867e-06	0.0005001	Vermis up
Plcxd2	31.14	-0.8082	0.2143	7.26e-06	0.002657	Hemisphere up
Ppp1r17	552.1	0.2823	0.05863	4.128e-05	0.004253	Vermis up
Prkcd	60.32	-0.6326	0.1534	2.023e-06	0.0008857	Hemisphere up
Prkcg	434.6	0.3173	0.06654	7.407e-07	0.0003399	Vermis up
Psd2	216.1	0.3357	0.08454	5.037e-06	0.001965	Vermis up
Ptprn	73.44	-0.5144	0.1392	1.001e-05	0.003508	Hemisphere up
Rgs8	752.1	0.4039	0.05287	2.927e-07	8.974e-05	Vermis up
Rnf19b	161.3	0.3763	0.0991	9.431e-06	0.003256	Vermis up
Selenow	1305	0.1814	0.04244	8.009e-06	0.002516	Vermis up
Sema7a	110.1	0.512	0.1225	2.299e-06	0.0009581	Vermis up
Sez6l	85.84	-0.4229	0.132	5.9e-05	0.01506	Hemisphere up
Slc12a5	242.6	-0.2979	0.07858	9.834e-06	0.003429	Hemisphere up
Slc1a6	218.4	-0.5249	0.08888	2.556e-06	0.0005947	Hemisphere up
Slc24a2	110.8	-0.3616	0.1169	9.476e-05	0.02233	Hemisphere up
Slc6a1	391.4	-0.2964	0.06559	8.687e-07	0.0004183	Hemisphere up
Snhg11	666.3	0.2442	0.07097	0.0002827	0.03319	Vermis up
Spag5	32.9	-0.8863	0.2048	8.007e-07	0.0003987	Hemisphere up
Sparcl1	1307	-0.1656	0.04841	0.0001725	0.02946	Hemisphere up
Stmn4	144.4	0.4387	0.1057	2.093e-06	0.0009453	Vermis up
Th	10.13	-3.254	0.4745	1.059e-12	1.655e-09	Hemisphere up
Tmem255a	83.57	0.4491	0.138	5.753e-05	0.01467	Vermis up
Ywhah	2096	0.1836	0.0443	0.0001176	0.01168	Vermis up

## Sheet: S2b
Gene	Region	LRT_gene	baseMean	log2FoldChange_CD_vs_HC	lfcSE_CD_vs_HC	pvalue_CD_vs_HC	padj_CD_vs_HC	change_CD_vs_HC	log2FoldChange_TN_vs_HC	lfcSE_TN_vs_HC	pvalue_TN_vs_HC	padj_TN_vs_HC	change_TN_vs_HC	log2FoldChange_TN_vs_CD	lfcSE_TN_vs_CD	pvalue_TN_vs_CD	padj_TN_vs_CD	change_TN_vs_CD
Atp5md	Vermis	0	1014	0.02296	0.04352	0.2264	0.9998	None	-0.1629	0.1012	0.006009	0.9658	None	-0.2988	0.09022	0.0001197	0.03525	Down
Calb1	Vermis	0	2624	-0.02326	0.03981	0.2854	0.9998	None	0.182	0.0723	0.006648	0.3883	None	0.274	0.07359	0.001571	0.07561	Up
Cck	Vermis	0	409.8	-0.00553	0.03971	0.657	0.9998	None	0.3199	0.1545	0.002026	0.4393	None	0.3969	0.1381	0.0008324	0.07934	Up
Chchd10	Vermis	0	663.6	-0.1842	0.1692	0.00436	0.9514	None	0.02915	0.0563	0.2883	1	None	0.3458	0.1076	0.000115	0.03479	Up
Chchd2	Vermis	0	1018	-0.05773	0.07482	0.03976	0.9998	None	0.07825	0.07882	0.05078	1	None	0.3021	0.08975	0.0001108	0.03239	Up
Dbi	Hemisphere	0	999.8	-2.247e-05	0.001443	0.04485	0.9999	None	0.05491	0.06604	0.031	0.9999	None	0.3609	0.1005	0.0004469	0.08175	Up
Dbi	Vermis	0	2005	-0.1757	0.07688	0.004827	0.437	None	0.02792	0.04841	0.3556	1	None	0.2716	0.07732	0.001085	0.07077	Up
Dipk1b	Vermis	0	228.2	-0.05458	0.09362	0.009734	0.9998	None	0.03435	0.06749	0.1114	1	None	0.6012	0.1782	4.097e-05	0.01565	Up
Dynll1	Vermis	0	345.2	-0.01855	0.04514	0.1534	0.9998	None	0.1748	0.1905	0.009377	1	None	0.4628	0.1439	7.66e-05	0.026	Up
Erg28	Vermis	0	238.3	-0.01669	0.04486	0.1285	0.9998	None	0.1103	0.2061	0.0139	1	None	0.545	0.1747	9.79e-05	0.03098	Up
Glul	Vermis	0	277.5	0.01196	0.04201	0.3071	0.9998	None	-0.2893	0.1955	0.00369	0.9632	None	-0.4981	0.1618	0.0001097	0.03374	Down
Hspe1	Vermis	0	423.3	-0.03904	0.06829	0.03138	0.9998	None	0.04868	0.07497	0.09018	1	None	0.4059	0.1333	0.0001586	0.04404	Up
Iscu	Vermis	0	198.9	-0.03042	0.0592	0.01213	0.9998	None	0.02235	0.05985	0.2395	1	None	0.5334	0.1934	0.0002684	0.0662	Up
Lhx1os	Vermis	0	398.8	-0.02432	0.04922	0.09456	0.9998	None	0.08672	0.1236	0.029	1	None	0.4179	0.1378	0.0001616	0.04474	Up
Meg3	Hemisphere	0	384.2	7.422e-06	0.001443	0.3306	0.9999	None	-0.3268	0.1557	0.001158	0.7773	None	-0.5034	0.1416	2.971e-05	0.03828	Down
Mlf2	Vermis	0	438.2	-0.01386	0.04199	0.3113	0.9998	None	0.1872	0.1603	0.007689	1	None	0.369	0.13	0.0003044	0.0727	Up
Mobp	Vermis	0	132.2	0.0986	0.134	0.01387	0.9998	None	-0.0207	0.06102	0.163	1	None	-0.738	0.2378	0.0007703	0.06787	Down
Mpc1	Vermis	0	523.8	-0.02546	0.04894	0.1153	0.9998	None	0.1245	0.1336	0.01763	1	None	0.3824	0.12	0.0001167	0.03485	Up
Mrps33	Vermis	0	232.2	-0.03686	0.07021	0.01138	0.9998	None	0.02556	0.06096	0.2123	1	None	0.5133	0.1773	0.0001876	0.05053	Up
Mt1	Hemisphere	0	2344	0.06225	0.04118	0.009931	0.9784	None	-0.03965	0.0468	0.06725	0.9999	None	-0.3357	0.08374	0.000181	0.07426	Down
Ndufa3	Vermis	0	440.7	0.009153	0.04016	0.4989	0.9998	None	-0.3003	0.1419	0.001249	0.5236	None	-0.4083	0.131	0.0001241	0.03694	Down
Nenf	Vermis	0	177	-0.02045	0.04798	0.04287	0.9998	None	0.0356	0.06994	0.07621	1	None	0.5834	0.2029	0.0001849	0.04987	Up
Pcp2	Vermis	0	3812	-0.1137	0.06619	0.009798	0.7671	None	0.06616	0.05365	0.07489	1	None	0.2569	0.06285	0.0001794	0.03215	Up
Rpl9	Vermis	0	465	-0.03464	0.06037	0.04921	0.9998	None	0.06227	0.08815	0.06115	1	None	0.3935	0.1298	0.0003825	0.05352	Up
Tsc22d4	Vermis	0	339.3	-0.02803	0.05384	0.05088	0.9998	None	0.05882	0.09131	0.05153	1	None	0.4604	0.1492	0.0003758	0.04494	Up
Actb	Vermis	1	775.9	-0.02908	0.04972	0.1268	0.9998	None	-0.4402	0.1037	0.0001049	0.02208	Down	-0.277	0.105	0.001803	0.1483	None
Adcy1	Vermis	1	379.2	0.03694	0.0665	0.0364	0.9998	None	-0.11	0.1608	0.02147	1	None	-0.5273	0.143	0.0001259	0.0186	Down
Aldoc	Vermis	1	2974	-0.5018	0.08794	5.108e-05	0.02716	Down	-0.1784	0.0821	0.01331	0.4558	None	0.2273	0.08605	0.008957	0.3017	None
Atp5k	Vermis	1	499	3.898e-05	0.03859	0.9798	0.9998	None	-0.371	0.1249	0.0001401	0.1208	None	-0.3765	0.1238	0.0001682	0.04637	Down
Calm2	Vermis	1	2192	-0.01131	0.03574	0.5655	0.9998	None	0.2088	0.07136	0.0005825	0.2319	None	0.257	0.06872	0.0001228	0.02949	Up
Cox5a	Vermis	1	850	-0.04208	0.06217	0.05924	0.9998	None	0.278	0.09798	0.000278	0.1978	None	0.4749	0.09455	1.253e-07	0.0001348	Up
Cycs	Vermis	1	518.5	-0.2106	0.1415	0.003621	0.9123	None	0.04521	0.06894	0.1239	1	None	0.4496	0.1191	1.28e-05	0.006306	Up
Cystm1	Vermis	1	464.1	-0.2833	0.143	0.001793	0.562	None	0.08549	0.1136	0.03482	1	None	0.589	0.1257	5.922e-06	0.001516	Up
Eef1a2	Hemisphere	1	102.3	-1.266	0.256	5.269e-08	0.0007052	Down	-1.69	0.2413	8.316e-13	8.318e-09	Down	-0.02464	0.0686	0.1281	0.9998	None
Eef1a2	Vermis	1	188	-1.296	0.1839	2.399e-13	2.158e-09	Down	-1.496	0.182	5.592e-17	3.555e-13	Down	-0.0411	0.09665	0.325	0.9998	None
Ftl1	Hemisphere	1	237.1	1.471e-06	0.001443	0.8013	0.9999	None	0.7075	0.1719	3.6e-06	0.01054	Up	0.6597	0.1726	9.786e-06	0.01513	Up
Ftl1	Vermis	1	517.5	-0.0391	0.06582	0.0401	0.9998	None	0.2605	0.131	0.001877	0.6608	None	0.5403	0.1186	5.73e-07	0.000453	Up
Gabarapl2	Vermis	1	622	-0.01218	0.04036	0.4231	0.9998	None	0.263	0.1154	0.001076	0.4698	None	0.367	0.1092	6.746e-05	0.02357	Up
Gapdh	Hemisphere	1	1153	-0.127	0.1036	0.004179	0.9999	None	0.03294	0.0464	0.06292	0.9999	None	0.3831	0.09008	6.024e-06	0.01072	Up
Gapdh	Vermis	1	2235	-0.2553	0.06923	3.263e-05	0.03549	Down	0.04874	0.05194	0.1475	1	None	0.3584	0.06628	1.214e-07	0.0001358	Up
Gm15446	Vermis	1	11.06	-0.06137	0.06654	0.0001232	0.1007	None	0.004042	0.05735	0.4191	1	None	6.011	2.426	2.654e-05	0.01136	Up
Gm47283	Hemisphere	1	34.69	2.632e-06	0.001443	0.005953	0.9999	None	8.804	2.631	3.032e-05	0.01008	Up	4.147	0.6128	0.0009305	0.01526	Up
Gm47283	Vermis	1	62.12	0.08609	0.06926	0.001768	0.6812	None	8.069	1.286	4.274e-09	1.071e-05	Up	3.813	0.409	3.129e-21	2.012e-17	Up
Gm49980	Vermis	1	255.2	0.6777	0.1638	2.23e-06	0.004376	Up	0.001781	0.0539	0.9217	1	None	-0.6629	0.1631	3.644e-06	0.002142	Down
Gng13	Hemisphere	1	1370	-1.973e-05	0.001443	0.09662	0.9999	None	-0.3848	0.08961	0.0004089	0.07818	Down	-0.2129	0.09979	0.006756	0.5864	None
Gng13	Vermis	1	2158	-0.377	0.07115	6.37e-06	0.005349	Down	-0.4487	0.06971	2.653e-07	0.000363	Down	-0.04598	0.05898	0.332	0.9998	None
Gpr37l1	Vermis	1	1086	-0.3304	0.09342	0.0004141	0.06767	Down	-0.02825	0.05288	0.3339	1	None	0.2485	0.09376	0.002368	0.1776	None
Hopx	Vermis	1	408.6	-0.4885	0.1337	7.276e-05	0.02824	Down	-0.169	0.1674	0.01038	1	None	0.1201	0.1194	0.06419	0.9998	None
Itm2b	Vermis	1	2341	-0.05941	0.05868	0.04847	0.9998	None	0.1919	0.0702	0.0009319	0.2977	None	0.3396	0.06699	2.426e-06	0.001395	Up
Ivns1abp	Hemisphere	1	104.9	0.5765	0.2933	0.001212	0.9999	None	-0.00743	0.03162	0.1254	0.9999	None	-1.042	0.2416	8.852e-07	0.002294	Down
Ivns1abp	Vermis	1	198.1	1.005	0.1776	1.135e-09	4.55e-06	Up	0.007549	0.05521	0.6557	1	None	-0.9209	0.1772	1.387e-08	1.817e-05	Down
Mbp	Vermis	1	626.2	0.3867	0.1338	0.003831	0.3161	None	-0.207	0.113	0.02222	0.6183	None	-0.8681	0.1509	2.202e-05	0.005859	Down
Meg3	Vermis	1	774.1	0.2582	0.1096	0.0007622	0.3601	None	-0.04615	0.06555	0.1375	1	None	-0.4296	0.09948	2.602e-06	0.001637	Down
Mpc2	Vermis	1	400.8	-0.02587	0.05045	0.08247	0.9998	None	0.237	0.1552	0.004113	0.9689	None	0.5136	0.1318	6.313e-06	0.003514	Up
Mt1	Vermis	1	5091	0.1778	0.06077	0.001921	0.2574	None	-0.2493	0.05962	0.0004418	0.05435	Down	-0.4771	0.05819	1.912e-06	0.0005342	Down
Mt2	Hemisphere	1	517.3	1.917e-05	0.001443	0.03052	0.9999	None	-0.09061	0.105	0.01252	0.9952	None	-0.5173	0.1219	0.0001637	0.01803	Down
Mt2	Vermis	1	1072	0.2358	0.09878	0.0009322	0.3526	None	-0.2548	0.09684	0.0006566	0.2937	None	-0.5812	0.08866	8.529e-09	6.099e-06	Down
Ndufb1-ps	Vermis	1	355.2	0.00885	0.04049	0.4825	0.9998	None	-0.4599	0.1446	6.242e-05	0.06478	Down	-0.5663	0.141	3.585e-06	0.002143	Down
Ndufc2	Vermis	1	522.2	-0.03243	0.05592	0.06288	0.9998	None	0.1772	0.1429	0.007803	0.9994	None	0.45	0.1173	1.013e-05	0.005148	Up
Pcp4	Hemisphere	1	2622	-1.08e-05	0.001443	0.4201	0.9999	None	0.5377	0.08664	3.459e-05	0.02664	Up	0.6079	0.08578	8.544e-06	0.008106	Up
Pcp4	Vermis	1	5614	-0.1016	0.05894	0.04136	0.6676	None	0.3607	0.0835	0.0005032	0.1482	None	0.5627	0.079	3.867e-06	0.001935	Up
Pcsk1n	Hemisphere	1	314.6	-1.752e-05	0.001443	0.01223	0.9999	None	0.03374	0.06601	0.01658	0.9999	None	0.6556	0.1509	1.392e-06	0.003719	Up
Pcsk1n	Vermis	1	555.3	-0.188	0.1382	0.004476	0.9433	None	0.1971	0.1344	0.005637	0.975	None	0.5839	0.1152	1.033e-07	0.0001047	Up
Ppia	Vermis	1	1500	-0.212	0.08451	0.0009851	0.3246	None	0.07641	0.06889	0.05388	1	None	0.3798	0.07738	1.434e-05	0.002392	Up
Ptgds	Vermis	1	401.4	-1.323	0.2022	0.000396	0.05993	Down	-1.219	0.2256	0.0009178	0.1045	None	0.03508	0.09682	0.4261	0.9998	None
Pvalb	Vermis	1	3914	-0.1438	0.06693	0.003116	0.5126	None	0.156	0.06342	0.002766	0.4523	None	0.3674	0.06021	4.773e-07	0.0003032	Up
Rpl37	Vermis	1	576.5	-0.03206	0.05441	0.08131	0.9998	None	-0.4751	0.1125	2.252e-06	0.003518	Down	-0.2642	0.1193	0.002342	0.3042	None
Rpl38	Vermis	1	637.4	-0.0281	0.05011	0.1181	0.9998	None	-0.5672	0.109	2.872e-06	0.002086	Down	-0.3899	0.1138	0.0001642	0.02664	Down
Rps28	Vermis	1	237.1	0.007562	0.04084	0.4805	0.9998	None	-0.4665	0.1837	0.0004067	0.2523	None	-0.6029	0.1746	3.04e-05	0.01247	Down
Selenow	Vermis	1	1952	-0.04651	0.05422	0.07613	0.9998	None	0.3295	0.07066	4.167e-06	0.006121	Up	0.462	0.07037	5.897e-09	9.445e-06	Up
Shank3	Vermis	1	35.44	1.434	0.4395	0.0001165	0.05802	Up	-0.0004688	0.05688	0.9476	1	None	-1.466	0.4392	9.36e-05	0.01919	Down
Slc15a2	Vermis	1	17.12	2.64	0.6969	6.627e-05	0.02302	Up	0.006468	0.05771	0.1686	1	None	-0.06373	0.1309	0.00131	0.1491	None
Snhg11	Vermis	1	1023	0.4038	0.08944	1.096e-06	0.002346	Up	-0.03775	0.05757	0.2147	1	None	-0.5205	0.08798	3.017e-09	5.118e-06	Down
Tmsb4x	Hemisphere	1	795	-1.952e-06	0.001443	0.6525	0.9999	None	0.4124	0.1059	0.0009001	0.08306	Up	0.4729	0.1088	0.0004664	0.05138	Up
Tmsb4x	Vermis	1	1560	-0.1304	0.08633	0.01536	0.877	None	0.1227	0.08172	0.02349	0.9617	None	0.3833	0.0865	0.0002756	0.03011	Up
Ttr	Vermis	1	1178	0.2567	0.09755	0.003839	0.2637	None	1.341	0.09173	1.789e-14	6.392e-11	Up	1.003	0.09173	1.231e-09	9.813e-07	Up
Ubb	Vermis	1	1747	-0.1895	0.07675	0.0008091	0.355	None	0.02438	0.04651	0.41	1	None	0.2665	0.07164	4.616e-05	0.01716	Up
Ywhah	Vermis	1	3140	-0.1084	0.06903	0.01732	0.8265	None	0.2076	0.06883	0.00272	0.2275	None	0.4024	0.06842	5.852e-05	0.01027	Up
