# Supplementary material for: Region- and cell type-specific changes in gene expression in the cerebellum after classical fear conditioning
Source: Research Square preprint supplement (doi:10.21203/rs.3.rs-6469280/v1), 2025-05-07
Supplement: Supplementary file 8 [file 5ae0976d0c386067ad44bb97.xlsx]

## Sheet: Overview
Table S3
TableS3a: Region specific DEGs
Column	Description
Gene	gene symbol
Region	region of cerebellum
LRT_gene	significance for likelihood ratio test (LRT) across conditions
baseMean	average of the normalized count values, dividing by size factors, taken over all samples
log2FoldChange_CD_vs_HC	log2(fold change) for CD vs HC comparison
lfcSE_CD_vs_HC	standard error estimate of log2FoldChange for CD vs HC comparison
pvalue_CD_vs_HC	p-value for CD vs HC comparison
padj_CD_vs_HC	adjusted p-value using the Benjamini and Hochberg method for CD vs HC comparison
Direction_CD_vs_HC	direction which the gene is differentially expressed in the CD vs HC comparison
log2FoldChange_TN_vs_HC	log2(fold change) for TN vs HC comparison
lfcSE_TN_vs_HC	standard error estimate of log2FoldChange for TN vs HC comparison
pvalue_TN_vs_HC	p-value for TN vs HC comparison
padj_TN_vs_HC	adjusted p-value using the Benjamini and Hochberg method for TN vs HC comparison
Direction_TN_vs_HC	direction which the gene is differentially expressed in the TN vs HC comparison
log2FoldChange_TN_vs_CD	log2(fold change) for TN vs CD comparison
lfcSE_TN_vs_CD	standard error estimate of log2FoldChange for TN vs CD comparison
pvalue_TN_vs_CD	p-value for TN vs CD comparison
padj_TN_vs_CD	adjusted p-value using the Benjamini and Hochberg method for TN vs CD comparison
Direction_TN_vs_CD	direction which the gene is differentially expressed in the TN vs CD comparison
S3b: Functional enrichment analysis
Column	Description
Region	region of cerebellum
Comparison	condition comparison in which DEGs are identified
Direction	direction in which the process is enriched in
ID	gene ontology (GO) ID
Description	description of GO biological process
GeneRatio	number of DEGs associated with the process / total number of DEGs in the corresponding region
BgRatio	number of genes associated with the process / total number all genes
pvalue	p-value
p.adjust	adjusted p-value
qvalue	q-value
geneID	gene symbol of DEGs associated with the process
Count	number of DEGs associated with the process

## Sheet: S3a
Gene	Region	LRT_gene	baseMean	log2FoldChange_CD_vs_HC	lfcSE_CD_vs_HC	pvalue_CD_vs_HC	padj_CD_vs_HC	Direction_CD_vs_HC	log2FoldChange_TN_vs_HC	lfcSE_TN_vs_HC	pvalue_TN_vs_HC	padj_TN_vs_HC	Direction_TN_vs_HC	log2FoldChange_TN_vs_CD	lfcSE_TN_vs_CD	pvalue_TN_vs_CD	padj_TN_vs_CD	Direction_TN_vs_CD
0610012G03Rik	DCN	1	193.5	-0.3407	0.1305	0.0003982	0.08308	None	0.2426	0.135	0.004759	0.2685	None	0.711	0.127	1.322e-09	2.332e-07	Up
1110008P14Rik	DCN	1	515.1	-0.1476	0.08936	0.008614	0.6105	None	0.2677	0.08727	0.0001717	0.02174	Up	0.4965	0.08593	5.949e-10	1.115e-07	Up
1500011B03Rik	DCN	0	145.7	-0.01217	0.05994	0.6312	0.9997	None	0.2939	0.1636	0.00355	0.2196	None	0.3889	0.1516	0.0008664	0.03595	Up
1700007K13Rik	DCN	1	17.98	0.02142	0.06962	0.04837	0.9997	None	1.31	0.4526	0.0001372	0.01799	Up	0.1102	0.1914	0.04772	0.5339	None
1700094D03Rik	DCN	1	33.14	0.6032	0.3865	0.002657	0.2611	None	0.9011	0.3461	0.0003101	0.03617	Up	0.04396	0.1322	0.4312	0.9469	None
2300009A05Rik	DCN	1	98.7	-0.07668	0.1255	0.02796	0.9997	None	0.1502	0.1956	0.02561	0.7166	None	0.641	0.1812	2.293e-05	0.00169	Up
Acot13	DCN	1	224.6	-0.04351	0.0707	0.1853	0.9997	None	0.2484	0.1326	0.004001	0.2371	None	0.4327	0.1248	4.449e-05	0.002828	Up
Actb	DCN	1	943.3	-0.04194	0.0489	0.235	0.9997	None	-0.3354	0.06603	2.911e-08	1.487e-05	Down	-0.2664	0.06573	9.679e-06	0.0007878	Down
Adamts10	DCN	0	21.95	0.026	0.0713	0.07374	0.9997	None	-0.04355	0.1008	0.04385	0.8592	None	-1.071	0.4288	0.0005606	0.02532	Down
Adcy1	DCN	1	88.31	0.02536	0.06603	0.3069	0.9997	None	-0.3671	0.2301	0.004019	0.2372	None	-0.5879	0.199	0.0001869	0.01007	Down
Adipor2	DCN	1	165.4	0.5033	0.1332	7.153e-06	0.002943	Up	0.001425	0.07423	0.9713	0.9991	None	-0.4904	0.1462	5.874e-05	0.003551	Down
Akap8l	DCN	0	62.04	0.01984	0.06547	0.3482	0.9997	None	-0.2132	0.4941	0.0125	0.4947	None	-0.5835	0.2492	0.001008	0.04037	Down
Anln	DCN	1	130.8	0.6375	0.142	3.233e-07	0.0002661	Up	-0.04308	0.08727	0.2789	0.9991	None	-0.8118	0.1602	2.423e-08	3.263e-06	Down
Ano8	DCN	1	23.68	-1.305	0.3361	4.647e-06	0.002221	Down	-1.169	0.3886	0.0001144	0.01554	Down	0.007868	0.1304	0.8558	0.9971	None
Ap2s1	DCN	1	273.5	-0.03576	0.06373	0.2629	0.9997	None	0.3372	0.1135	0.0001796	0.02255	Up	0.4683	0.111	2.017e-06	0.0001879	Up
Arf5	DCN	0	188.6	-0.009434	0.05723	0.7889	0.9997	None	0.2763	0.1339	0.00235	0.1695	None	0.3268	0.1268	0.001125	0.0441	Up
Arhgdig	DCN	1	143.7	-0.3516	0.1582	0.0009858	0.1421	None	0.07107	0.09987	0.1354	0.9991	None	0.5968	0.153	5.959e-06	0.0004987	Up
Arhgef10	DCN	1	80.51	0.4015	0.1993	0.001422	0.1708	None	-0.06515	0.1094	0.09729	0.9991	None	-0.7723	0.2062	1.002e-05	0.0008069	Down
Arrdc2	DCN	1	67.79	0.808	0.1927	1.206e-06	0.0007555	Up	0.02534	0.08504	0.4187	0.9991	None	-0.592	0.2212	0.0004156	0.01967	Down
Atp1a1	DCN	0	187.8	0.02511	0.06163	0.3927	0.9997	None	-0.2351	0.1545	0.007798	0.3738	None	-0.3768	0.1396	0.0006596	0.02874	Down
Atp5d	DCN	1	663	-0.09232	0.07678	0.04163	0.9997	None	0.1224	0.07942	0.0286	0.7467	None	0.3	0.08229	4.123e-05	0.00269	Up
Atp5f1	DCN	1	865	-0.08105	0.06337	0.05311	0.9997	None	0.1884	0.07064	0.001051	0.09657	None	0.3284	0.06997	3.801e-07	3.937e-05	Up
Atp5g1	DCN	1	915.1	-0.1237	0.07087	0.01094	0.6775	None	0.1649	0.07136	0.003329	0.2118	None	0.3516	0.07114	9.841e-08	1.176e-05	Up
Atp5g3	DCN	1	842.3	-0.1924	0.06662	0.0003286	0.07239	None	0.02361	0.05355	0.5797	0.9991	None	0.24	0.06783	9.315e-05	0.00539	Up
Atp5h	DCN	1	1157	-0.03658	0.04764	0.2901	0.9997	None	0.2901	0.06187	2.561e-07	0.0001084	Up	0.3564	0.06158	9.268e-10	1.695e-07	Up
Atp5j	DCN	1	1234	-0.07246	0.05795	0.06708	0.9997	None	0.1167	0.06321	0.01947	0.6125	None	0.2409	0.06487	4.715e-05	0.002956	Up
Atp5j2	DCN	1	1324	-0.1529	0.0613	0.001428	0.1708	None	0.02346	0.05046	0.5713	0.9991	None	0.2003	0.06126	0.0003273	0.01644	Up
Atp5l	DCN	1	1158	-0.163	0.06143	0.0008643	0.1348	None	0.04898	0.05309	0.2555	0.9991	None	0.2443	0.06209	1.904e-05	0.001425	Up
Atp5o	DCN	1	744	-0.1937	0.07434	0.0007282	0.1226	None	0.1591	0.07386	0.00528	0.2876	None	0.4124	0.07407	2.693e-09	4.461e-07	Up
Atp6v0b	DCN	0	416.9	-0.1653	0.09078	0.005352	0.438	None	0.03271	0.06422	0.4779	0.9991	None	0.2496	0.08965	0.001052	0.04177	Up
Atp6v1f	DCN	1	426.3	-0.1978	0.09356	0.002265	0.2362	None	0.1086	0.08448	0.05149	0.8912	None	0.3947	0.09179	1.8e-06	0.0001699	Up
Atpif1	DCN	1	818	-0.06041	0.05912	0.1176	0.9997	None	0.1272	0.07053	0.0171	0.5822	None	0.2474	0.07181	0.0001214	0.006784	Up
Bag1	DCN	0	189.4	-0.02677	0.06316	0.3489	0.9997	None	0.1895	0.147	0.01474	0.5433	None	0.3504	0.1363	0.001019	0.04069	Up
Bc1	DCN	1	69.31	0.01732	0.06523	0.3712	0.9997	None	1.22	0.2073	1.88e-10	1.646e-07	Up	1.026	0.2079	4.075e-08	5.249e-06	Up
Bcl2l1	DCN	1	114.5	0.3185	0.1741	0.002331	0.2395	None	0.4445	0.1724	0.0004266	0.04673	Up	0.05019	0.1072	0.4806	0.9632	None
Bex2	DCN	1	375.3	-0.0288	0.05754	0.3813	0.9997	None	0.2188	0.1005	0.002704	0.1829	None	0.3163	0.09704	0.0001509	0.008291	Up
Bod1	DCN	1	102.2	-0.3957	0.1888	0.001214	0.1578	None	0.03367	0.08362	0.3766	0.9991	None	0.5719	0.1842	0.0001112	0.006261	Up
Bola3	DCN	1	239.9	-0.1668	0.1222	0.0105	0.6675	None	0.1062	0.1004	0.06341	0.964	None	0.4109	0.1138	2.802e-05	0.001986	Up
Bsg	DCN	1	796.1	-0.1664	0.06846	0.00143	0.1708	None	0.05411	0.05809	0.2247	0.9991	None	0.2634	0.06931	2.846e-05	0.001998	Up
C1qb	DCN	0	87.78	0.0249	0.06598	0.3072	0.9997	None	-0.1991	0.2732	0.01612	0.5686	None	-0.4858	0.2032	0.001049	0.04177	Down
Calb1	DCN	1	81.21	0.6462	0.2038	5.847e-05	0.01843	Up	-0.06155	0.109	0.08774	0.9991	None	-1.045	0.224	1.649e-07	1.865e-05	Down
Calm2	DCN	0	1177	-0.105	0.05889	0.01534	0.8206	None	0.04036	0.05182	0.3414	0.9991	None	0.1779	0.06062	0.001229	0.04734	Up
Car8	DCN	1	111.9	0.8045	0.1462	1.753e-09	2.361e-06	Up	-0.257	0.2443	0.01054	0.4526	None	-1.264	0.1744	2.612e-14	1.173e-11	Down
Cbln3	DCN	1	29.62	0.02674	0.07096	0.114	0.9997	None	-1.405	0.401	2.705e-05	0.004606	Down	-1.859	0.3862	1.161e-07	1.343e-05	Down
Ccdc85b	DCN	1	215.6	-0.1379	0.1403	0.01862	0.9162	None	0.2867	0.1282	0.001544	0.1299	None	0.5876	0.1224	1.076e-07	1.266e-05	Up
Cdk19	DCN	1	59.48	0.01556	0.06402	0.4483	0.9997	None	-0.5545	0.273	0.001523	0.1294	None	-0.7447	0.25	0.0001512	0.008291	Down
Cdkn1a	DCN	1	29.56	1.297	0.3087	1.224e-06	0.0007555	Up	0.7055	0.4186	0.002214	0.1648	None	-0.09244	0.1599	0.142	0.7974	None
Cdr1os	DCN	1	118.9	-0.6744	0.1648	1.896e-06	0.001068	Down	0.6445	0.1539	1.315e-06	0.0003896	Up	1.419	0.1614	7.907e-20	7.932e-17	Up
Chchd1	DCN	1	161.9	-0.09054	0.1219	0.03816	0.9997	None	0.2062	0.1499	0.0114	0.4741	None	0.5224	0.1377	1.039e-05	0.0008275	Up
Chchd10	DCN	1	1246	-0.2769	0.06076	3.496e-07	0.0002725	Down	0.1974	0.0618	0.0001915	0.02364	Up	0.5103	0.06174	1.218e-17	9.496e-15	Up
Chchd2	DCN	1	1343	-0.234	0.05563	1.987e-06	0.001068	Down	0.2405	0.05636	1.795e-06	0.0004834	Up	0.5075	0.05651	2.459e-20	3.311e-17	Up
Chn2	DCN	1	90.65	0.04874	0.08386	0.08001	0.9997	None	-0.1149	0.1727	0.03416	0.7949	None	-0.5716	0.2021	0.000274	0.01414	Down
Cldn11	DCN	1	443	-0.01787	0.05435	0.5749	0.9997	None	-0.3529	0.1023	3.558e-05	0.005791	Down	-0.3059	0.1006	0.0003229	0.01627	Down
Cltb	DCN	0	347	-0.08012	0.0885	0.06219	0.9997	None	0.0888	0.08861	0.09604	0.9991	None	0.2963	0.1052	0.0006904	0.02982	Up
Cnpy1	DCN	0	28.16	0.02483	0.0702	0.1143	0.9997	None	-0.04971	0.1049	0.04403	0.8594	None	-0.8811	0.3842	0.0009141	0.03735	Down
Coprs	DCN	1	109	-0.028	0.06696	0.2737	0.9997	None	0.3869	0.176	0.001187	0.1053	None	0.587	0.1665	2.558e-05	0.00183	Up
Cops6	DCN	1	196.6	-0.09114	0.117	0.03995	0.9997	None	0.1346	0.1278	0.0363	0.8231	None	0.4388	0.1317	7.017e-05	0.004191	Up
Cops9	DCN	0	773.7	-0.06385	0.05879	0.1024	0.9997	None	0.09906	0.06605	0.04672	0.8672	None	0.2189	0.06997	0.0004614	0.02116	Up
Cox14	DCN	1	389.7	-0.1122	0.09707	0.02742	0.9997	None	0.2294	0.09973	0.001867	0.1464	None	0.4524	0.09681	2.674e-07	2.903e-05	Up
Cox4i1	DCN	1	2893	-0.06433	0.04111	0.05326	0.9997	None	0.3612	0.04444	3.605e-17	1.78e-13	Up	0.4465	0.04458	1.317e-24	4.876e-21	Up
Cox5a	DCN	1	1138	-0.1284	0.06991	0.008658	0.6107	None	0.2463	0.06989	4.224e-05	0.006656	Up	0.4309	0.06911	4.557e-11	1.038e-08	Up
Cox5b	DCN	1	1614	-0.0419	0.045	0.2093	0.9997	None	0.1986	0.05538	4.736e-05	0.007232	Up	0.2709	0.05496	1.611e-07	1.835e-05	Up
Cox6a1	DCN	1	1592	-0.044	0.04817	0.2091	0.9997	None	0.2709	0.05967	5.33e-07	0.0001926	Up	0.3478	0.05926	5.929e-10	1.115e-07	Up
Cox6b1	DCN	1	1174	-0.05791	0.0519	0.1178	0.9997	None	0.1348	0.06087	0.006564	0.333	None	0.2357	0.06132	2.92e-05	0.002019	Up
Cox7a2	DCN	1	1430	-0.1411	0.05783	0.001911	0.2097	None	0.1528	0.05802	0.001716	0.1389	None	0.3352	0.05835	1.296e-09	2.314e-07	Up
Cox7a2l	DCN	1	336.7	-0.1059	0.09688	0.03248	0.9997	None	0.2366	0.1019	0.001701	0.1389	None	0.4562	0.09901	3.554e-07	3.734e-05	Up
Cox7b	DCN	0	1432	-0.0992	0.06272	0.02258	0.974	None	0.05158	0.05544	0.2387	0.9991	None	0.1947	0.06426	0.0007821	0.03291	Up
Cox8a	DCN	0	2209	-0.09811	0.04692	0.009032	0.6219	None	0.03505	0.04337	0.3517	0.9991	None	0.1549	0.04839	0.0006403	0.02798	Up
Cryab	DCN	1	841.2	-0.07418	0.06757	0.07503	0.9997	None	0.2854	0.07776	1.946e-05	0.003581	Up	0.4263	0.07678	2.822e-09	4.544e-07	Up
Csrp1	DCN	0	488.1	-0.04755	0.06291	0.1916	0.9997	None	0.1381	0.08895	0.02141	0.6524	None	0.2695	0.08973	0.0004517	0.02093	Up
Cst3	DCN	1	3137	-0.08553	0.06212	0.04149	0.9997	None	0.1979	0.06622	0.0004216	0.04673	Up	0.336	0.06512	3.373e-08	4.383e-06	Up
Cyc1	DCN	1	469.8	-0.1691	0.08798	0.004267	0.3724	None	0.04933	0.06648	0.29	0.9991	None	0.2805	0.08708	0.0002125	0.01136	Up
Cycs	DCN	1	534.9	-0.07681	0.06862	0.06752	0.9997	None	0.1953	0.08023	0.001824	0.1461	None	0.3449	0.07922	1.695e-06	0.0001631	Up
D8Ertd738e	DCN	1	268.9	-0.01966	0.05695	0.5409	0.9997	None	0.2446	0.1133	0.002306	0.1695	None	0.3251	0.1086	0.0003397	0.01689	Up
Daam2	DCN	1	106.8	0.45	0.1593	0.0001848	0.04489	Up	0.0155	0.07842	0.669	0.9991	None	-0.3579	0.1752	0.003546	0.1088	None
Dapk3	DCN	1	16.95	-2.252	0.4083	2.168e-09	2.677e-06	Down	-2.193	0.4835	4.783e-07	0.0001782	Down	0.0001491	0.1336	0.9965	0.9991	None
Dbndd2	DCN	1	693.3	0.2816	0.09281	0.0001357	0.03589	Up	-0.02249	0.06469	0.6151	0.9991	None	-0.3381	0.09357	3.752e-05	0.002504	Down
Dctn3	DCN	1	264.4	-0.03534	0.06299	0.2804	0.9997	None	0.2382	0.1152	0.002935	0.1952	None	0.3713	0.1104	8.034e-05	0.004741	Up
Ddt	DCN	1	268	-0.05067	0.07123	0.1586	0.9997	None	0.3007	0.1118	0.0004568	0.0489	Up	0.4622	0.1088	1.809e-06	0.0001699	Up
Ddx17	DCN	1	184.6	0.07137	0.09397	0.06979	0.9997	None	-0.1363	0.1376	0.03634	0.8231	None	-0.4145	0.1373	0.0002212	0.01179	Down
Ddx5	DCN	1	501.7	0.112	0.07802	0.0215	0.9532	None	-0.1221	0.0822	0.03159	0.7683	None	-0.3165	0.08408	2.414e-05	0.001753	Down
Dexi	DCN	1	129.2	-0.4198	0.1474	0.0001815	0.04481	Down	-0.1389	0.1556	0.03394	0.7945	None	0.1008	0.1217	0.1987	0.8566	None
Dgkz	DCN	1	73.4	0.02844	0.06892	0.2217	0.9997	None	-0.6244	0.2384	0.0003593	0.04032	Down	-0.8781	0.2237	4.729e-06	0.0004073	Down
Dip2a	DCN	1	129.3	0.06442	0.09561	0.07085	0.9997	None	-0.2421	0.201	0.01028	0.4439	None	-0.5718	0.1653	3.545e-05	0.002376	Down
Dnajc15	DCN	1	194.9	-0.1181	0.1455	0.02504	0.9997	None	0.1752	0.1414	0.01833	0.5932	None	0.5071	0.133	1.002e-05	0.0008069	Up
Dock9	DCN	1	104	0.2654	0.2077	0.005868	0.4624	None	-0.03695	0.08641	0.32	0.9991	None	-0.4895	0.1872	0.0005819	0.02604	Down
Drap1	DCN	1	222.5	-0.03656	0.06562	0.2544	0.9997	None	0.2775	0.1254	0.001702	0.1389	None	0.4272	0.12	3.189e-05	0.002187	Up
Dtnbp1	DCN	1	170.3	-0.3183	0.137	0.000877	0.1353	None	0.04707	0.08176	0.2864	0.9991	None	0.4742	0.1367	3.907e-05	0.002595	Up
Dusp1	DCN	1	52.8	0.9056	0.2322	4.012e-06	0.002049	Up	0.02363	0.08642	0.3888	0.9991	None	-0.6252	0.2691	0.0009665	0.0389	Down
Dynll1	DCN	1	552.4	-0.06063	0.06429	0.1198	0.9997	None	0.4463	0.07872	8.856e-10	6.657e-07	Up	0.5687	0.07914	5.152e-14	2.18e-11	Up
Dynll2	DCN	1	660.4	-0.1523	0.0741	0.003972	0.3593	None	0.03111	0.0577	0.4774	0.9991	None	0.2218	0.07431	0.0007067	0.03026	Up
Dynlrb1	DCN	1	569.7	-0.03084	0.05303	0.3681	0.9997	None	0.2176	0.08047	0.0007263	0.07319	None	0.2963	0.07887	2.776e-05	0.001977	Up
Eef1a1	DCN	1	1518	-0.0688	0.05564	0.08054	0.9997	None	0.162	0.06296	0.001837	0.1463	None	0.2772	0.06261	1.773e-06	0.0001694	Up
Eef1a2	DCN	1	196.4	-1.519	0.1158	1.46e-40	2.163e-36	Down	-1.419	0.1297	4.639e-29	6.872e-25	Down	0.04764	0.1032	0.5032	0.97	None
Eef1b2	DCN	1	337.6	-0.03682	0.0609	0.2814	0.9997	None	0.2443	0.1017	0.001325	0.1155	None	0.3602	0.09866	2.931e-05	0.002019	Up
Egr1	DCN	1	21.38	2.686	0.4225	1.793e-11	3.32e-08	Up	1.968	0.4704	1.553e-06	0.0004273	Up	-0.12	0.1957	0.05976	0.5914	None
Eif1	DCN	0	919.2	-0.0466	0.051	0.1965	0.9997	None	0.1156	0.06291	0.01937	0.6105	None	0.2054	0.06431	0.0004142	0.01966	Up
Eif1b	DCN	0	306.5	-0.05743	0.0723	0.1312	0.9997	None	0.1334	0.09981	0.03078	0.7662	None	0.3042	0.1025	0.0004129	0.01966	Up
Emc6	DCN	1	159.6	-0.3427	0.1384	0.0005559	0.1084	None	0.008968	0.07248	0.8185	0.9991	None	0.3802	0.143	0.000698	0.02997	Up
Enho	DCN	1	341.1	-0.2227	0.09994	0.001516	0.1768	None	0.3237	0.09662	5.457e-05	0.008165	Up	0.6274	0.0959	4.196e-12	1.219e-09	Up
Etv1	DCN	0	123.7	0.04369	0.07651	0.1288	0.9997	None	-0.09798	0.1334	0.05983	0.9472	None	-0.4207	0.1763	0.001265	0.04853	Down
Fabp5	DCN	1	365.3	-0.06647	0.07315	0.09848	0.9997	None	0.1893	0.09541	0.005332	0.2883	None	0.3531	0.09334	1.826e-05	0.001373	Up
Fam107a	DCN	1	166.4	0.6252	0.1221	1.467e-08	1.448e-05	Up	-0.0314	0.07875	0.4413	0.9991	None	-0.7293	0.138	8.117e-09	1.215e-06	Down
Fam162a	DCN	1	162.8	-0.08882	0.1203	0.0395	0.9997	None	0.1542	0.1435	0.02641	0.7231	None	0.4797	0.1394	4.277e-05	0.002766	Up
Fau	DCN	1	1308	-0.1304	0.05795	0.003539	0.3318	None	0.142	0.05826	0.003331	0.2118	None	0.3153	0.0589	1.358e-08	1.916e-06	Up
Fdx2	DCN	1	88.16	-0.2758	0.2619	0.006535	0.5016	None	0.401	0.2005	0.001674	0.1385	None	0.9413	0.1858	2.116e-08	2.903e-06	Up
Fis1	DCN	1	529.9	-0.1663	0.08623	0.00421	0.3712	None	0.345	0.08286	2.206e-06	0.0005733	Up	0.5807	0.08272	1.671e-13	6.345e-11	Up
Fkbp2	DCN	0	356.1	-0.02189	0.05619	0.4895	0.9997	None	0.1969	0.1045	0.006025	0.3121	None	0.2823	0.1003	0.0007576	0.03207	Up
Fkbp3	DCN	1	386.8	-0.03579	0.05956	0.2918	0.9997	None	0.1816	0.09793	0.007371	0.3616	None	0.2965	0.09522	0.0002753	0.01416	Up
Fos	DCN	1	58.95	3.352	0.519	5.241e-12	1.294e-08	Up	2.908	0.532	2.155e-09	1.52e-06	Up	-0.03523	0.1381	0.3651	0.9441	None
Fth1	DCN	1	14210	0.2608	0.06159	1.621e-06	0.0009607	Up	0.1871	0.06138	0.0003387	0.0383	Up	-0.06086	0.05581	0.234	0.8856	None
Ftl1	DCN	1	676.2	0.008905	0.05018	0.7823	0.9997	None	0.3685	0.08214	4.813e-07	0.0001782	Up	0.3503	0.08149	2.134e-06	0.0001976	Up
Gabarap	DCN	1	338	-0.01602	0.05389	0.6146	0.9997	None	0.2173	0.09986	0.002732	0.184	None	0.2796	0.09614	0.000597	0.02656	Up
Gabarapl2	DCN	1	542.7	-0.05634	0.06498	0.1401	0.9997	None	0.191	0.08733	0.003392	0.214	None	0.327	0.08551	1.76e-05	0.001344	Up
Gad1	DCN	1	322.7	0.03966	0.06319	0.2466	0.9997	None	0.3681	0.1037	2.329e-05	0.004107	Up	0.2591	0.1009	0.001802	0.0659	None
Gapdh	DCN	1	3053	-0.2457	0.04814	2.544e-08	2.356e-05	Down	0.002763	0.04208	0.9332	0.9991	None	0.254	0.0489	4.64e-08	5.681e-06	Up
Gdf10	DCN	1	23.35	0.04593	0.08956	0.006232	0.4833	None	-0.05598	0.1127	0.01336	0.5139	None	-1.663	0.4204	4.896e-06	0.0004193	Down
Glrx3	DCN	1	201	-0.03527	0.06586	0.2613	0.9997	None	0.2185	0.1348	0.007516	0.3626	None	0.383	0.1263	0.0002311	0.01218	Up
Glrx5	DCN	1	252.9	-0.07788	0.0934	0.0629	0.9997	None	0.554	0.1086	1.805e-08	9.903e-06	Up	0.7576	0.1098	3.169e-13	1.145e-10	Up
Gm13889	DCN	1	68.54	-0.3489	0.2547	0.004192	0.3712	None	0.05858	0.1021	0.1336	0.9991	None	0.7145	0.2128	4.01e-05	0.002646	Up
Gm15446	DCN	1	8.667	-4.338	1.024	1.053e-05	0.004215	Down	-0.02116	0.08944	0.1569	0.9991	None	3.441	1.076	0.0002934	0.01494	Up
Gm1673	DCN	1	368.1	-0.3649	0.09364	5.038e-06	0.002332	Down	0.05121	0.07111	0.2763	0.9991	None	0.4733	0.09753	1.034e-07	1.226e-05	Up
Gm17018	DCN	1	149.2	-0.06388	0.09545	0.06459	0.9997	None	0.182	0.1682	0.01834	0.5932	None	0.5115	0.1519	5.157e-05	0.003157	Up
Gm19935	DCN	1	42.81	0.03303	0.07554	0.05304	0.9997	None	0.9392	0.2945	5.378e-05	0.008129	Up	0.2317	0.3055	0.02705	0.4148	None
Gm3764	DCN	0	100.6	0.05016	0.08406	0.08501	0.9997	None	-0.1105	0.158	0.04075	0.8495	None	-0.5225	0.1909	0.000389	0.01883	Down
Gm47283	DCN	1	27.29	5.99	2.289	1.216e-06	0.0007555	Up	9.759	2.679	6.085e-14	1.127e-10	Up	3.003	0.3531	1.669e-18	1.373e-15	Up
Gm49980	DCN	1	142.1	0.09086	0.1302	0.0329	0.9997	None	-0.1872	0.1915	0.01839	0.5936	None	-0.5713	0.1599	2.331e-05	0.00171	Down
Gng13	DCN	1	449.7	0.3233	0.08939	1.615e-05	0.005836	Up	-0.4968	0.1004	4.369e-08	2.029e-05	Down	-0.8777	0.09732	1.322e-20	2.448e-17	Down
Gng3	DCN	1	554.8	-0.1986	0.08529	0.001374	0.1697	None	0.1836	0.08469	0.003815	0.2279	None	0.457	0.08364	4.263e-09	6.647e-07	Up
Gpx1	DCN	0	236	-0.07421	0.09185	0.06817	0.9997	None	0.1007	0.1022	0.07317	0.9937	None	0.3366	0.1193	0.0005405	0.02448	Up
Gpx4	DCN	1	1369	-0.02997	0.04572	0.3687	0.9997	None	0.3027	0.0601	3.966e-08	1.958e-05	Up	0.3584	0.05984	2.663e-10	5.479e-08	Up
Grcc10	DCN	1	407.7	-0.06815	0.07209	0.09327	0.9997	None	0.1834	0.09152	0.005427	0.2902	None	0.3435	0.08987	1.639e-05	0.001258	Up
Grm4	DCN	1	23.29	0.0415	0.08413	0.01194	0.6993	None	-0.08677	0.1657	0.001995	0.1531	None	-1.892	0.4327	9.155e-07	9.041e-05	Down
Guk1	DCN	1	328.3	-0.1138	0.1024	0.02724	0.9997	None	0.3624	0.1006	1.958e-05	0.003581	Up	0.5844	0.0998	3.406e-10	6.738e-08	Up
H2afz	DCN	1	330	-0.09275	0.0926	0.04555	0.9997	None	0.1182	0.09542	0.04432	0.8594	None	0.3356	0.1018	0.0001199	0.006729	Up
Hapln2	DCN	1	139.6	0.1708	0.1697	0.01288	0.7252	None	-0.1058	0.1306	0.05893	0.9437	None	-0.5173	0.1525	4.975e-05	0.003083	Down
Hcn2	DCN	1	441	-0.7527	0.08655	1.736e-19	8.57e-16	Down	-0.5933	0.09321	1.043e-11	1.404e-08	Down	0.1101	0.08767	0.1143	0.7509	None
Higd2a	DCN	1	218.8	-0.06837	0.09237	0.07244	0.9997	None	0.1323	0.1255	0.03788	0.8381	None	0.3999	0.1302	0.0001904	0.01022	Up
Hint1	DCN	1	962.9	-0.1023	0.06167	0.01895	0.9184	None	0.2112	0.06469	0.0001352	0.01788	Up	0.3632	0.06433	2.027e-09	3.45e-07	Up
Hnrnpa2b1	DCN	1	377.3	0.04949	0.06402	0.1773	0.9997	None	-0.185	0.1008	0.00749	0.3626	None	-0.3237	0.09658	0.0001074	0.00607	Down
Hopx	DCN	1	96.97	-0.04502	0.07909	0.1121	0.9997	None	-0.6764	0.1915	1.934e-05	0.003581	Down	-0.3889	0.2049	0.004125	0.1237	None
Hras	DCN	1	155.9	-0.4356	0.138	6.955e-05	0.02146	Down	0.005151	0.07275	0.8971	0.9991	None	0.4528	0.1467	0.0001517	0.008291	Up
Hsp90aa1	DCN	1	1268	-0.06976	0.06052	0.08053	0.9997	None	0.1156	0.06682	0.02379	0.6819	None	0.2436	0.06876	8.607e-05	0.005059	Up
Hspa5	DCN	1	264.7	0.1736	0.1196	0.008735	0.6132	None	0.3746	0.1139	5.768e-05	0.008459	Up	0.1159	0.09634	0.1168	0.7555	None
Hspa8	DCN	0	2361	-0.0352	0.04564	0.3018	0.9997	None	0.1112	0.05598	0.01543	0.5549	None	0.1779	0.05666	0.0006403	0.02798	Up
Hspe1	DCN	1	450.6	-0.01513	0.05317	0.6349	0.9997	None	0.2879	0.09407	0.0001669	0.02149	Up	0.3388	0.09202	2.903e-05	0.002019	Up
Icmt	DCN	1	44.1	0.02597	0.06953	0.177	0.9997	None	-0.6046	0.3394	0.002324	0.1695	None	-0.9914	0.2917	3.479e-05	0.002353	Down
Il16	DCN	1	8.325	0.009806	0.06574	0.2588	0.9997	None	-0.03791	0.09894	0.004824	0.27	None	-2.619	0.9285	0.000601	0.02666	Down
Il33	DCN	1	128.7	-0.6163	0.1514	2.02e-06	0.001068	Down	-0.0371	0.08257	0.3632	0.9991	None	0.4563	0.1694	0.0004879	0.02224	Up
Inpp5a	DCN	1	81.05	0.0407	0.07656	0.1216	0.9997	None	-0.3757	0.2489	0.004636	0.2631	None	-0.7082	0.2068	3.528e-05	0.002376	Down
Iscu	DCN	1	645.6	-0.2051	0.0834	0.0009982	0.1422	None	0.3434	0.0808	1.506e-06	0.0004273	Up	0.6083	0.08056	3.144e-15	1.725e-12	Up
Itpr1	DCN	1	172.6	0.7429	0.1319	8.328e-10	1.234e-06	Up	-0.09137	0.1202	0.09317	0.9991	None	-0.9978	0.1485	1.088e-12	3.583e-10	Down
Ivns1abp	DCN	1	169.3	0.8312	0.1318	1.407e-11	2.978e-08	Up	-0.0072	0.07535	0.8478	0.9991	None	-0.8527	0.1466	3.661e-10	7.135e-08	Down
Junb	DCN	1	40.09	2.772	0.3234	1.029e-18	3.81e-15	Up	2.622	0.3394	9.172e-16	2.717e-12	Up	-0.03484	0.1239	0.5661	0.9746	None
Jund	DCN	1	149.5	-0.6044	0.1417	9.093e-07	0.0006414	Down	-0.07718	0.1043	0.1144	0.9991	None	0.3435	0.1609	0.003	0.09621	None
Kif1b	DCN	0	389.4	0.04861	0.06423	0.1822	0.9997	None	-0.1405	0.09758	0.0246	0.6952	None	-0.2828	0.09702	0.0005687	0.02561	Down
Kif5a	DCN	1	305.1	0.07371	0.08263	0.07547	0.9997	None	-0.2063	0.1163	0.006764	0.3404	None	-0.407	0.1088	1.791e-05	0.001354	Down
Klk6	DCN	1	105.1	0.1778	0.3461	0.01128	0.6801	None	-0.1958	0.2945	0.01599	0.5679	None	-0.7931	0.198	3.449e-06	0.0003041	Down
Lars2	DCN	1	90.93	-0.02009	0.06536	0.351	0.9997	None	1.407	0.1719	1.392e-17	1.031e-13	Up	1.578	0.1775	3.084e-20	3.807e-17	Up
Lrrc17	DCN	1	5.164	-0.01654	0.06817	0.006117	0.4769	None	0.01205	0.08742	0.2929	0.9991	None	2.748	1.044	0.0006965	0.02997	Up
Mag	DCN	1	647.8	0.008406	0.05147	0.7947	0.9997	None	-0.2689	0.09393	0.0003142	0.03624	Down	-0.3029	0.09095	0.0001277	0.007085	Down
Malat1	DCN	1	159.8	-0.7707	0.1283	9.469e-11	1.559e-07	Down	-0.08083	0.1013	0.1143	0.9991	None	0.5454	0.1447	1.097e-05	0.0008694	Up
Manf	DCN	1	129.3	0.005974	0.05922	0.8139	0.9997	None	0.5384	0.1503	1.593e-05	0.003065	Up	0.5068	0.1501	5.061e-05	0.003111	Up
Map1lc3a	DCN	1	542.1	-0.3305	0.08557	6.084e-06	0.002649	Down	0.3145	0.086	1.849e-05	0.003511	Up	0.7011	0.08559	1.745e-17	1.231e-14	Up
Map1lc3b	DCN	1	560.1	-0.06429	0.06619	0.1053	0.9997	None	0.1528	0.08213	0.01006	0.437	None	0.2961	0.082	4.729e-05	0.002956	Up
Map6d1	DCN	1	42.57	-0.05425	0.09787	0.01717	0.8801	None	-0.7558	0.3006	0.0004523	0.0489	Down	-0.09329	0.1577	0.1527	0.8153	None
Map7	DCN	1	144.6	0.3244	0.1496	0.001189	0.1573	None	-0.01774	0.07661	0.6423	0.9991	None	-0.4041	0.1549	0.0007577	0.03207	Down
Mbp	DCN	1	8832	0.2132	0.06093	4.016e-05	0.01293	Up	-0.1144	0.05836	0.01109	0.4665	None	-0.3752	0.05955	3.977e-11	9.204e-09	Down
Mcf2l	DCN	0	71.74	0.1475	0.4984	0.01121	0.6801	None	-0.037	0.08935	0.2649	0.9991	None	-0.5389	0.2222	0.0008747	0.03613	Down
Mea1	DCN	1	189	-0.04105	0.06947	0.2008	0.9997	None	0.2835	0.1334	0.001976	0.1524	None	0.4606	0.1269	2.259e-05	0.001673	Up
Meg3	DCN	1	540.1	0.1586	0.08288	0.004989	0.4199	None	-0.09036	0.07669	0.08437	0.9991	None	-0.3249	0.08486	1.78e-05	0.001352	Down
Mgst3	DCN	1	408.1	-0.08184	0.08289	0.06045	0.9997	None	0.1729	0.09722	0.009301	0.41	None	0.3656	0.0954	1.468e-05	0.001144	Up
Micos10	DCN	1	622.5	-0.04744	0.05851	0.1951	0.9997	None	0.27	0.07982	6.133e-05	0.008907	Up	0.3762	0.07877	2.062e-07	2.314e-05	Up
Mien1	DCN	0	217.5	-0.06805	0.08909	0.0793	0.9997	None	0.1148	0.1125	0.05329	0.897	None	0.3585	0.1244	0.0004067	0.0195	Up
Mif	DCN	1	848	-0.1031	0.07117	0.02517	0.9997	None	0.2979	0.07338	3.97e-06	0.0009334	Up	0.4626	0.07286	2.005e-11	5.304e-09	Up
Mobp	DCN	1	2122	0.276	0.07017	5.411e-06	0.002429	Up	0.01499	0.05461	0.7302	0.9991	None	-0.2578	0.06986	4.503e-05	0.002851	Down
Morf4l1	DCN	1	688.9	-0.09659	0.07096	0.03241	0.9997	None	0.2276	0.0758	0.0002788	0.0333	Up	0.3911	0.07489	1.974e-08	2.733e-06	Up
Mpc1	DCN	1	733.9	-0.08959	0.06614	0.03873	0.9997	None	0.1608	0.0717	0.004219	0.2452	None	0.3136	0.07166	1.812e-06	0.0001699	Up
Mpc2	DCN	1	608.8	-0.1229	0.08891	0.01817	0.9071	None	0.1302	0.08523	0.02573	0.7166	None	0.3486	0.08754	8.43e-06	0.0006937	Up
Mrpl12	DCN	1	192.3	-0.1704	0.1486	0.01169	0.6955	None	0.1126	0.1151	0.05574	0.9153	None	0.4662	0.1295	2.463e-05	0.001771	Up
Mrpl34	DCN	0	188.2	-0.05601	0.0807	0.1123	0.9997	None	0.1381	0.1279	0.03405	0.7945	None	0.3765	0.1306	0.0003715	0.01814	Up
Mrpl42	DCN	0	211.3	-0.07595	0.09707	0.06157	0.9997	None	0.1054	0.109	0.06425	0.9661	None	0.3658	0.1261	0.0003716	0.01814	Up
Mrps24	DCN	1	180.4	-0.3113	0.1412	0.001138	0.1547	None	0.4602	0.13	2.033e-05	0.003673	Up	0.8867	0.1301	5.444e-13	1.833e-10	Up
Mrps33	DCN	1	261.7	-0.06305	0.08189	0.0973	0.9997	None	0.1995	0.1212	0.008645	0.394	None	0.4105	0.1153	3.433e-05	0.002343	Up
Mt1	DCN	1	4976	0.1357	0.04688	0.0005809	0.1101	None	-0.1387	0.0473	0.0008584	0.08204	None	-0.3027	0.04724	2.483e-11	6.341e-09	Down
Mt2	DCN	1	1018	0.3046	0.06434	1.345e-07	0.0001172	Up	-0.02631	0.05449	0.5399	0.9991	None	-0.35	0.06765	3.019e-08	3.958e-06	Down
Myl6	DCN	0	661.2	-0.03158	0.05192	0.3749	0.9997	None	0.1398	0.07485	0.01249	0.4947	None	0.2172	0.07464	0.0009371	0.03814	Up
Naca	DCN	1	477.5	0.01321	0.05113	0.6848	0.9997	None	0.3358	0.08567	6.158e-06	0.001341	Up	0.3075	0.08452	4.019e-05	0.002646	Up
Ndufa11	DCN	1	623.9	-0.1167	0.07444	0.01631	0.8597	None	0.1381	0.07492	0.01274	0.4951	None	0.3271	0.07623	2.466e-06	0.0002247	Up
Ndufa12	DCN	1	657.7	-0.1317	0.07962	0.01105	0.6775	None	0.2537	0.07937	0.0001263	0.01686	Up	0.4556	0.07838	5.71e-10	1.098e-07	Up
Ndufa13	DCN	1	806.5	-0.1604	0.069	0.00199	0.2151	None	0.1051	0.06552	0.03529	0.813	None	0.3201	0.06954	6.138e-07	6.185e-05	Up
Ndufa4	DCN	1	2253	-0.1201	0.0497	0.002793	0.2721	None	0.1909	0.05058	2.469e-05	0.004252	Up	0.3427	0.05049	1.624e-12	5.013e-10	Up
Ndufa6	DCN	1	948.1	-0.1787	0.06413	0.0004983	0.09975	None	0.2285	0.06453	4.422e-05	0.006834	Up	0.451	0.06436	2.35e-13	8.702e-11	Up
Ndufa8	DCN	1	357.5	-0.05868	0.0706	0.1273	0.9997	None	0.3394	0.09538	2.454e-05	0.004252	Up	0.4858	0.09449	2.258e-08	3.069e-06	Up
Ndufab1	DCN	1	576.9	-0.2156	0.07934	0.0004371	0.08869	None	0.249	0.07933	0.0001599	0.02078	Up	0.5255	0.07867	2.081e-12	6.166e-10	Up
Ndufb1-ps	DCN	1	482.7	0.01279	0.05194	0.664	0.9997	None	-0.3372	0.09544	2.797e-05	0.004708	Down	-0.381	0.09358	5.043e-06	0.0004293	Down
Ndufb10	DCN	1	543.1	-0.05976	0.06533	0.1239	0.9997	None	0.3088	0.08347	1.578e-05	0.003065	Up	0.4387	0.08267	1.04e-08	1.51e-06	Up
Ndufb3	DCN	0	393.6	-0.04006	0.0611	0.2515	0.9997	None	0.1616	0.09616	0.01267	0.4947	None	0.2854	0.09459	0.0004023	0.01935	Up
Ndufb4	DCN	1	571.8	-0.1587	0.07946	0.004198	0.3712	None	0.0693	0.06695	0.1495	0.9991	None	0.2906	0.07947	4.235e-05	0.002751	Up
Ndufb5	DCN	1	649.5	-0.1375	0.07653	0.007892	0.5731	None	0.2513	0.07645	9.403e-05	0.01302	Up	0.4537	0.07575	1.979e-10	4.189e-08	Up
Ndufb6	DCN	1	507.2	-0.2074	0.08088	0.0007475	0.1244	None	0.1931	0.08141	0.002164	0.1619	None	0.4664	0.08077	6.946e-10	1.286e-07	Up
Ndufb8	DCN	1	1086	-0.1117	0.06199	0.01209	0.7053	None	0.4117	0.06209	2.265e-12	3.728e-09	Up	0.5667	0.06247	9.411e-21	1.992e-17	Up
Ndufb9	DCN	1	812.4	-0.05524	0.05547	0.1347	0.9997	None	0.3828	0.06734	8.988e-10	6.657e-07	Up	0.4833	0.06754	7.364e-14	3.03e-11	Up
Ndufc1	DCN	0	811.6	-0.1292	0.07177	0.009219	0.6219	None	0.03522	0.05725	0.4218	0.9991	None	0.2062	0.07179	0.001166	0.04532	Up
Ndufc2	DCN	1	606	-0.05065	0.0586	0.173	0.9997	None	0.2633	0.07784	6.307e-05	0.00907	Up	0.3717	0.07693	1.597e-07	1.833e-05	Up
Ndufs3	DCN	0	262.4	-0.06148	0.07726	0.1089	0.9997	None	0.09938	0.09501	0.075	0.9937	None	0.2874	0.1089	0.001214	0.04695	Up
Ndufs4	DCN	0	295.2	-0.0572	0.0759	0.1223	0.9997	None	0.1299	0.1074	0.03698	0.8306	None	0.3235	0.1114	0.0004522	0.02093	Up
Ndufs5	DCN	1	737.2	-0.06927	0.0645	0.08785	0.9997	None	0.1399	0.0753	0.01269	0.4947	None	0.2781	0.07594	4.419e-05	0.002821	Up
Ndufs6	DCN	1	503.3	-0.08237	0.073	0.05651	0.9997	None	0.2284	0.08346	0.0006113	0.06328	None	0.3892	0.08217	2.351e-07	2.618e-05	Up
Ndufs7	DCN	1	442.1	-0.1221	0.09033	0.01936	0.9226	None	0.1549	0.09005	0.01304	0.5043	None	0.375	0.09004	3.475e-06	0.0003042	Up
Ndufs8	DCN	0	320.6	-0.106	0.1048	0.03298	0.9997	None	0.06865	0.08191	0.1675	0.9991	None	0.2983	0.1078	0.0007936	0.03316	Up
Ndufv2	DCN	1	543.3	-0.117	0.07839	0.01817	0.9071	None	0.2399	0.08029	0.0002678	0.03251	Up	0.4292	0.07936	6.206e-09	9.477e-07	Up
Neat1	DCN	1	232.8	0.2263	0.1158	0.002638	0.2611	None	-0.2825	0.1311	0.001964	0.1523	None	-0.6282	0.1197	1.071e-08	1.54e-06	Down
Nedd8	DCN	1	464.9	-0.06998	0.07338	0.0872	0.9997	None	0.1206	0.08614	0.03552	0.8157	None	0.2868	0.09004	0.0002297	0.01215	Up
Nell2	DCN	0	22.11	0.01365	0.06584	0.3143	0.9997	None	-0.05971	0.1168	0.01143	0.4741	None	-1.038	0.4492	0.0008867	0.03638	Down
Nenf	DCN	0	240	-0.02382	0.05916	0.4385	0.9997	None	0.1984	0.1214	0.008904	0.4019	None	0.3085	0.1151	0.0009504	0.03836	Up
Neurod1	DCN	1	27.31	-0.00288	0.06351	0.845	0.9997	None	-1.065	0.3966	0.0003156	0.03624	Down	-0.9973	0.4037	0.0006069	0.02684	Down
Nfasc	DCN	1	157.8	0.01253	0.05879	0.6508	0.9997	None	-0.486	0.1543	7.484e-05	0.01056	Down	-0.5575	0.1507	1.494e-05	0.001158	Down
Nme1	DCN	0	452.3	-0.1506	0.1032	0.01066	0.6691	None	0.05317	0.07246	0.2592	0.9991	None	0.2912	0.0981	0.0004227	0.01988	Up
Npas4	DCN	1	4.98	3.882	1.086	8.826e-05	0.02564	Up	0.0146	0.08853	0.04324	0.856	None	-0.07716	0.1684	0.01395	0.2879	None
Nptx1	DCN	1	35.52	0.03398	0.0757	0.06563	0.9997	None	-0.05801	0.1115	0.04274	0.856	None	-0.8688	0.3281	0.0003748	0.0182	Down
Nrbp2	DCN	0	134.2	0.07947	0.1174	0.04054	0.9997	None	-0.06366	0.09939	0.1476	0.9991	None	-0.414	0.168	0.001064	0.04215	Down
Nrep	DCN	1	111.2	0.04278	0.07545	0.1428	0.9997	None	-0.4651	0.1892	0.0006152	0.06328	None	-0.7111	0.1756	3.161e-06	0.000282	Down
Nrsn1	DCN	1	565.2	-0.2309	0.09498	0.0008627	0.1348	None	0.2587	0.09344	0.0004589	0.0489	Up	0.5699	0.0911	3.001e-11	7.409e-09	Up
Nrtn	DCN	0	25.86	-0.03782	0.08081	0.01107	0.6775	None	0.02798	0.08998	0.2318	0.9991	None	0.9699	0.383	0.000425	0.01992	Up
Ntan1	DCN	1	118.1	-0.04204	0.07607	0.1266	0.9997	None	0.3202	0.1806	0.003281	0.2109	None	0.6001	0.1645	1.581e-05	0.00122	Up
Nts	DCN	0	19.9	-0.01086	0.06556	0.3327	0.9997	None	0.056	0.1122	0.01694	0.5808	None	0.9313	0.4477	0.001207	0.04679	Up
Oaz1	DCN	1	886.2	-0.05163	0.05289	0.1605	0.9997	None	0.2701	0.06583	3.729e-06	0.0009055	Up	0.3639	0.06548	3.471e-09	5.529e-07	Up
Opalin	DCN	1	84.52	-0.6714	0.1936	2.123e-05	0.007148	Down	-9.236e-05	0.07844	0.9983	0.9999	None	0.6611	0.2089	7.996e-05	0.004738	Up
Pabpn1	DCN	1	17.24	-0.006164	0.06483	0.548	0.9997	None	0.9469	0.4571	0.001062	0.09657	None	1.247	0.4387	0.0001741	0.009428	Up
Pacs2	DCN	1	282.9	0.1239	0.1122	0.02262	0.974	None	-0.2733	0.1238	0.001813	0.146	None	-0.5325	0.1148	2.685e-07	2.903e-05	Down
Paqr8	DCN	1	339.3	0.2746	0.09343	0.0001806	0.04481	Up	0.07107	0.07927	0.1566	0.9991	None	-0.1456	0.09027	0.04466	0.5219	None
Pcp2	DCN	1	913.8	0.7439	0.07254	6.298e-26	4.664e-22	Up	0.03349	0.06076	0.4547	0.9991	None	-0.6831	0.07697	4.735e-20	5.396e-17	Down
Pcsk1n	DCN	1	1679	-0.1858	0.05653	9.618e-05	0.0274	Down	0.4046	0.05556	2.303e-14	4.874e-11	Up	0.6203	0.05593	1.039e-29	1.539e-25	Up
Pebp1	DCN	0	644	-0.05082	0.05946	0.1721	0.9997	None	0.1052	0.07409	0.04691	0.8689	None	0.2217	0.0782	0.001137	0.04446	Up
Pfdn1	DCN	1	179.5	-0.06138	0.08707	0.08752	0.9997	None	0.3335	0.1366	0.0007912	0.07761	None	0.5694	0.1313	9.777e-07	9.591e-05	Up
Pfdn2	DCN	1	272	-0.1213	0.1105	0.02398	0.9997	None	0.2169	0.111	0.004282	0.2468	None	0.4702	0.1069	9.141e-07	9.041e-05	Up
Pfdn5	DCN	1	516.1	-0.03133	0.05584	0.3569	0.9997	None	0.3339	0.08693	7.712e-06	0.001632	Up	0.4176	0.08607	1.138e-07	1.327e-05	Up
Pgp	DCN	0	175.2	-0.1076	0.1415	0.02816	0.9997	None	0.05803	0.08825	0.194	0.9991	None	0.3651	0.1413	0.0009154	0.03735	Up
Phpt1	DCN	1	128.5	-0.002498	0.05919	0.9208	0.9997	None	0.3585	0.1663	0.001408	0.1212	None	0.3892	0.1584	0.001144	0.04461	Up
Plin4	DCN	1	25.54	0.7491	0.3284	0.0006902	0.1189	None	-0.03858	0.09687	0.07702	0.9947	None	-1.451	0.3784	7.67e-06	0.0006347	Down
Podxl2	DCN	1	189.8	-0.6562	0.1243	6.365e-09	7.044e-06	Down	0.0155	0.07186	0.6752	0.9991	None	0.7065	0.1328	6.473e-09	9.784e-07	Up
Polr3e	DCN	1	119.3	0.406	0.1844	0.0009657	0.1421	None	0.6744	0.1764	5.779e-06	0.001297	Up	0.1132	0.1318	0.1546	0.8178	None
Pop5	DCN	1	161.5	-0.4043	0.1366	0.0001334	0.03589	Down	0.2218	0.1464	0.008445	0.3905	None	0.7659	0.1355	9.504e-10	1.717e-07	Up
Ppia	DCN	1	2338	-0.1061	0.04605	0.004744	0.4039	None	0.152	0.04732	0.0002948	0.03465	Up	0.2861	0.04755	3.039e-10	6.167e-08	Up
Ppp1r17	DCN	1	19.9	0.0214	0.06899	0.1133	0.9997	None	-0.05092	0.1077	0.01677	0.5778	None	-1.264	0.46	0.0002921	0.01492	Down
Prdx2	DCN	1	548.2	-0.04173	0.05653	0.2459	0.9997	None	0.1843	0.08107	0.002999	0.1983	None	0.2853	0.0797	5.75e-05	0.003505	Up
Prdx5	DCN	1	787.3	-0.09886	0.06916	0.02888	0.9997	None	0.2124	0.07324	0.000429	0.04673	Up	0.3742	0.0724	2.766e-08	3.692e-06	Up
Prdx6	DCN	0	384.9	-0.008931	0.0534	0.7736	0.9997	None	0.2241	0.1024	0.002567	0.1772	None	0.2669	0.09788	0.001111	0.04387	Up
Prelid1	DCN	1	295.2	-0.003966	0.05401	0.8951	0.9997	None	0.3589	0.1056	4.085e-05	0.006507	Up	0.3788	0.1041	2.83e-05	0.001996	Up
Prkcd	DCN	0	35.46	0.03827	0.07954	0.04091	0.9997	None	-0.03937	0.09572	0.1277	0.9991	None	-0.7499	0.3365	0.001115	0.04394	Down
Prxl2b	DCN	1	169.7	-0.1237	0.1583	0.02262	0.974	None	0.2244	0.1504	0.008515	0.3905	None	0.5678	0.1376	2.473e-06	0.0002247	Up
Psmb6	DCN	1	244.7	-0.03248	0.06258	0.3076	0.9997	None	0.2085	0.1214	0.00709	0.3513	None	0.3452	0.1153	0.000307	0.01558	Up
Psmc5	DCN	1	299.2	-0.1286	0.1148	0.02056	0.9532	None	0.278	0.1105	0.0008237	0.07975	None	0.5344	0.1071	4.515e-08	5.62e-06	Up
Ptgds	DCN	1	2691	-0.4822	0.1085	4.219e-07	0.0003125	Down	0.0158	0.06772	0.7127	0.9991	None	0.5268	0.1075	7.142e-08	8.671e-06	Up
Ptma	DCN	1	616.2	-0.1551	0.07425	0.003675	0.3424	None	0.02923	0.05765	0.5043	0.9991	None	0.221	0.07477	0.0007948	0.03316	Up
Ptpn11	DCN	1	146.3	0.1963	0.1646	0.009151	0.6219	None	-0.04848	0.08686	0.2562	0.9991	None	-0.4089	0.1511	0.0005759	0.02585	Down
Pvalb	DCN	1	2302	-0.133	0.06291	0.004614	0.3951	None	0.2927	0.06212	2.132e-07	9.57e-05	Up	0.47	0.0616	2.225e-15	1.268e-12	Up
Qdpr	DCN	0	862.2	-0.08524	0.07675	0.05275	0.9997	None	0.09127	0.0754	0.07959	0.9991	None	0.2628	0.08366	0.0003152	0.01593	Up
Rab31	DCN	1	133.9	0.3531	0.153	0.0007998	0.1316	None	-0.02695	0.07976	0.4926	0.9991	None	-0.4723	0.1605	0.000238	0.0125	Down
Rabac1	DCN	1	403.6	-0.2138	0.09275	0.001313	0.1648	None	0.06923	0.07415	0.1638	0.9991	None	0.3575	0.0925	1.304e-05	0.001022	Up
Rack1	DCN	1	308.4	-0.03127	0.06028	0.3388	0.9997	None	0.2355	0.1097	0.002551	0.1772	None	0.3495	0.1054	0.0001049	0.005956	Up
Rbx1	DCN	1	323	-0.02681	0.05755	0.4087	0.9997	None	0.241	0.1039	0.001652	0.1375	None	0.3355	0.1004	0.0001036	0.005901	Up
Rdh14	DCN	1	53.77	-0.01992	0.06652	0.2917	0.9997	None	0.4685	0.2674	0.002402	0.1703	None	0.7603	0.2403	7.437e-05	0.004424	Up
Rell2	DCN	1	267.3	-0.2494	0.1103	0.001252	0.1608	None	0.205	0.1108	0.005836	0.3077	None	0.5608	0.1071	1.177e-08	1.677e-06	Up
Reln	DCN	1	22.18	0.01105	0.06508	0.4027	0.9997	None	-0.08096	0.1513	0.00317	0.2059	None	-1.195	0.442	0.000333	0.01661	Down
Resp18	DCN	1	294.6	-0.2367	0.1101	0.001702	0.1925	None	0.1005	0.0938	0.07262	0.9937	None	0.4465	0.1074	2.767e-06	0.0002499	Up
Rex1bd	DCN	1	200.4	-0.01539	0.05811	0.5949	0.9997	None	0.4244	0.1228	2.913e-05	0.004848	Up	0.4938	0.1216	3.74e-06	0.000324	Up
Rgs10	DCN	1	95.05	-0.01526	0.06304	0.4962	0.9997	None	0.5988	0.1831	4.429e-05	0.006834	Up	0.7308	0.1814	3.084e-06	0.0002769	Up
Rgs5	DCN	0	107.2	0.04479	0.07847	0.1175	0.9997	None	-0.1404	0.1954	0.02781	0.7424	None	-0.5152	0.1863	0.0003631	0.01787	Down
Rnaseh2c	DCN	0	104.4	-0.03693	0.07339	0.1507	0.9997	None	0.1219	0.164	0.03696	0.8306	None	0.4695	0.1842	0.0006905	0.02982	Up
Rnd2	DCN	1	352.7	-0.02126	0.05499	0.4449	0.9997	None	0.2175	0.09921	0.002633	0.1803	None	0.3028	0.09588	0.000227	0.01205	Up
Rnf112	DCN	1	56.83	0.05074	0.0905	0.0396	0.9997	None	-0.6494	0.2892	0.0009036	0.08472	None	-1.138	0.2578	5.659e-07	5.781e-05	Down
Rnf7	DCN	0	297.8	-0.04363	0.06691	0.2027	0.9997	None	0.135	0.1072	0.03233	0.7761	None	0.2961	0.1094	0.0009459	0.03828	Up
Rpl10	DCN	1	377.9	-0.2153	0.09992	0.001971	0.2147	None	0.3025	0.09674	0.0001242	0.01672	Up	0.5998	0.09538	2.281e-11	5.928e-09	Up
Rpl10a	DCN	1	441.1	-0.03876	0.05832	0.2668	0.9997	None	0.3508	0.08677	3.546e-06	0.0008903	Up	0.4487	0.0863	1.847e-08	2.581e-06	Up
Rpl11	DCN	1	1124	-0.1189	0.06022	0.007644	0.5605	None	0.2809	0.06113	3.858e-07	0.0001504	Up	0.443	0.06107	4.031e-14	1.756e-11	Up
Rpl12	DCN	1	432.1	-0.08189	0.08071	0.05864	0.9997	None	0.3095	0.09236	5.693e-05	0.008433	Up	0.4855	0.09112	8.519e-09	1.262e-06	Up
Rpl13	DCN	1	1343	-0.1125	0.05788	0.009273	0.6219	None	0.3668	0.05831	2.343e-11	2.67e-08	Up	0.5177	0.05853	8.032e-20	7.932e-17	Up
Rpl13a	DCN	1	1146	-0.07203	0.05504	0.06657	0.9997	None	0.4605	0.06012	1.323e-15	3.266e-12	Up	0.5695	0.06053	3.978e-22	9.82e-19	Up
Rpl14	DCN	1	698.1	-0.09911	0.07075	0.02932	0.9997	None	0.3164	0.07379	1.386e-06	0.0004025	Up	0.4767	0.07357	8.243e-12	2.348e-09	Up
Rpl15	DCN	1	619.6	-0.06462	0.06196	0.1009	0.9997	None	0.2246	0.07583	0.0003229	0.03679	Up	0.3515	0.07491	3.513e-07	3.717e-05	Up
Rpl17	DCN	1	1071	-0.2292	0.06262	1.858e-05	0.0064	Down	0.4007	0.06171	5.808e-12	8.603e-09	Up	0.6632	0.06236	1.418e-27	9.922e-24	Up
Rpl18	DCN	1	503.4	-0.134	0.0875	0.01265	0.7208	None	0.2007	0.08737	0.002403	0.1703	None	0.4211	0.08581	9.164e-08	1.104e-05	Up
Rpl18a	DCN	1	755	-0.1119	0.07311	0.01891	0.9184	None	0.324	0.07388	8.715e-07	0.0002812	Up	0.497	0.07364	1.273e-12	4.012e-10	Up
Rpl19	DCN	1	859.4	-0.1201	0.06661	0.01062	0.6691	None	0.2502	0.06784	2.191e-05	0.00391	Up	0.4234	0.06747	3.74e-11	8.793e-09	Up
Rpl21	DCN	1	1506	-0.1055	0.05633	0.01228	0.7134	None	0.3085	0.05759	7.039e-09	4.344e-06	Up	0.4524	0.05757	3.807e-16	2.35e-13	Up
Rpl22l1	DCN	1	447.4	-0.2233	0.09083	0.0008517	0.1348	None	0.1115	0.08376	0.04614	0.8663	None	0.4175	0.09016	3.614e-07	3.77e-05	Up
Rpl23	DCN	1	1140	-0.07366	0.05661	0.06398	0.9997	None	0.2796	0.06318	9.271e-07	0.0002922	Up	0.3964	0.06289	3.323e-11	7.94e-09	Up
Rpl23a	DCN	1	698.7	-0.1487	0.07114	0.003867	0.3536	None	0.2547	0.07123	3.303e-05	0.005436	Up	0.4584	0.07093	9.6e-12	2.633e-09	Up
Rpl24	DCN	1	871.5	-0.1433	0.07204	0.005319	0.4377	None	0.1612	0.07162	0.004136	0.2421	None	0.365	0.07159	4.12e-08	5.261e-06	Up
Rpl26	DCN	1	1114	-0.1296	0.06408	0.005747	0.4577	None	0.4967	0.06239	1.167e-16	4.324e-13	Up	0.6677	0.06297	2.01e-27	9.922e-24	Up
Rpl27	DCN	1	517.3	-0.1356	0.08069	0.01013	0.6573	None	0.07499	0.06937	0.1275	0.9991	None	0.2797	0.08127	9.861e-05	0.005662	Up
Rpl27a	DCN	1	978.4	-0.1168	0.06715	0.01251	0.7208	None	0.2636	0.06816	1.019e-05	0.002067	Up	0.4338	0.06769	1.464e-11	3.943e-09	Up
Rpl28	DCN	1	926.3	-0.1011	0.06269	0.02096	0.9532	None	0.1324	0.06467	0.009692	0.4235	None	0.2876	0.06582	2.17e-06	0.0001997	Up
Rpl29	DCN	1	565.6	-0.04431	0.06163	0.2158	0.9997	None	0.241	0.09152	0.0007475	0.07431	None	0.3605	0.08912	6.16e-06	0.0005126	Up
Rpl3	DCN	1	599	-0.107	0.07585	0.02419	0.9997	None	0.3098	0.07784	4.927e-06	0.00114	Up	0.4856	0.07748	3.184e-11	7.732e-09	Up
Rpl30	DCN	1	780.2	-0.195	0.07302	0.0006005	0.1101	None	0.1189	0.07017	0.0238	0.6819	None	0.3718	0.07312	4.355e-08	5.467e-06	Up
Rpl31	DCN	0	540.5	-0.1121	0.07829	0.02157	0.9532	None	0.06664	0.06745	0.164	0.9991	None	0.2481	0.0807	0.00044	0.02049	Up
Rpl32	DCN	1	902.2	-0.2406	0.06375	1.17e-05	0.004443	Down	0.2194	0.06482	8.2e-05	0.01146	Up	0.5001	0.06482	1.056e-15	6.256e-13	Up
Rpl34	DCN	1	828	-0.2351	0.06606	2.679e-05	0.008817	Down	0.04811	0.05624	0.2734	0.9991	None	0.3161	0.06811	5.331e-07	5.484e-05	Up
Rpl35	DCN	1	275.3	-0.2684	0.1076	0.0006321	0.1128	None	-0.372	0.1141	6.667e-05	0.009496	Down	-0.0603	0.09041	0.3849	0.9453	None
Rpl35a	DCN	1	1021	-0.1726	0.0724	0.001486	0.1747	None	0.09917	0.06674	0.04848	0.879	None	0.329	0.07156	6.005e-07	6.093e-05	Up
Rpl36a	DCN	1	324.6	-0.2376	0.102	0.001132	0.1547	None	0.01636	0.06553	0.7086	0.9991	None	0.2879	0.1024	0.000736	0.03133	Up
Rpl36al	DCN	0	387.7	-0.07687	0.07827	0.07046	0.9997	None	0.1065	0.08577	0.05528	0.9129	None	0.2856	0.09335	0.0003504	0.0173	Up
Rpl37a	DCN	1	809.2	-0.1682	0.06827	0.001325	0.1649	None	0.01459	0.05363	0.7197	0.9991	None	0.2058	0.06872	0.0007918	0.03316	Up
Rpl39	DCN	1	663	-0.1419	0.07326	0.005796	0.4592	None	-0.2311	0.0774	0.0002874	0.03406	Down	-0.06327	0.06807	0.2881	0.9218	None
Rpl41	DCN	1	1279	-0.1901	0.05822	0.0001012	0.02827	Down	-0.09471	0.05653	0.0381	0.8385	None	0.08199	0.05642	0.1103	0.742	None
Rpl5	DCN	1	440.7	-0.009335	0.05111	0.7703	0.9997	None	0.2712	0.08892	0.0001834	0.02282	Up	0.3043	0.08697	6.889e-05	0.004131	Up
Rpl6	DCN	1	704.2	-0.05523	0.05766	0.1452	0.9997	None	0.2898	0.07248	5.276e-06	0.001202	Up	0.3965	0.07204	4.091e-09	6.447e-07	Up
Rpl7	DCN	1	564.1	-0.05453	0.06062	0.1531	0.9997	None	0.3289	0.07813	1.867e-06	0.0004939	Up	0.441	0.07784	1.384e-09	2.412e-07	Up
Rpl7a	DCN	1	476.1	-0.02974	0.05743	0.3722	0.9997	None	0.2414	0.09721	0.001088	0.09765	None	0.3364	0.0942	4.403e-05	0.002821	Up
Rpl8	DCN	1	786.9	-0.06215	0.06039	0.1106	0.9997	None	0.3219	0.07265	7.134e-07	0.0002458	Up	0.4383	0.07232	1.294e-10	2.779e-08	Up
Rpl9	DCN	1	968.8	-0.2591	0.06902	1.162e-05	0.004443	Down	0.3176	0.0688	3.068e-07	0.0001262	Up	0.6171	0.06882	2.227e-20	3.299e-17	Up
Rplp0	DCN	1	417.4	-0.01836	0.05267	0.5725	0.9997	None	0.2067	0.09109	0.002425	0.1711	None	0.2683	0.08825	0.0004181	0.01972	Up
Rplp1	DCN	1	1953	-0.07841	0.04929	0.03245	0.9997	None	0.3165	0.05264	1.539e-10	1.52e-07	Up	0.429	0.05265	3.912e-17	2.634e-14	Up
Rplp2	DCN	1	591.1	-0.1713	0.0746	0.001862	0.2058	None	0.05278	0.0614	0.2504	0.9991	None	0.2722	0.07566	5.832e-05	0.00354	Up
Rps10	DCN	1	823	-0.1792	0.07666	0.001637	0.188	None	0.3221	0.07468	1.202e-06	0.0003634	Up	0.5565	0.07437	5.607e-15	2.967e-12	Up
Rps11	DCN	1	785.8	-0.1482	0.07483	0.004934	0.4177	None	0.2989	0.07357	3.821e-06	0.0009129	Up	0.5047	0.0732	4.345e-13	1.533e-10	Up
Rps12	DCN	1	926.5	-0.0832	0.06274	0.04693	0.9997	None	0.2868	0.06842	2.366e-06	0.0006044	Up	0.423	0.06805	5.168e-11	1.16e-08	Up
Rps13	DCN	1	783.2	-0.1288	0.07019	0.009093	0.6219	None	0.2874	0.07033	3.669e-06	0.0009055	Up	0.4699	0.0701	1.865e-12	5.639e-10	Up
Rps14	DCN	1	851.5	-0.1368	0.06691	0.00517	0.4292	None	0.412	0.06556	2.179e-11	2.67e-08	Up	0.5937	0.06612	1.965e-20	3.234e-17	Up
Rps15	DCN	1	991	-0.079	0.05837	0.05083	0.9997	None	0.3445	0.0636	4.009e-09	2.7e-06	Up	0.4695	0.0637	1.565e-14	7.243e-12	Up
Rps15a	DCN	1	647.3	-0.2419	0.07518	8.468e-05	0.02509	Down	-0.04452	0.06095	0.3245	0.9991	None	0.175	0.07569	0.00727	0.185	None
Rps16	DCN	1	759.6	-0.1637	0.07108	0.002047	0.2197	None	0.2801	0.07053	6.024e-06	0.001332	Up	0.4959	0.07035	1.559e-13	6.078e-11	Up
Rps18	DCN	1	408.9	-0.2297	0.08921	0.0006251	0.1128	None	0.1886	0.08987	0.004221	0.2452	None	0.4956	0.08875	1.968e-09	3.389e-07	Up
Rps19	DCN	1	629.3	-0.1481	0.07946	0.006013	0.4712	None	0.4454	0.07579	2.592e-10	2.133e-07	Up	0.653	0.07645	9.188e-19	8.006e-16	Up
Rps2	DCN	1	545.3	-0.08546	0.07266	0.0509	0.9997	None	0.3442	0.07949	1.049e-06	0.0003237	Up	0.499	0.07936	2.739e-11	6.878e-09	Up
Rps20	DCN	1	918	-0.09157	0.0617	0.03144	0.9997	None	0.326	0.06515	4.382e-08	2.029e-05	Up	0.4654	0.0652	8.816e-14	3.529e-11	Up
Rps23	DCN	1	771.4	-0.1735	0.06997	0.00126	0.1608	None	0.2965	0.06933	1.558e-06	0.0004273	Up	0.5178	0.06934	6.792e-15	3.245e-12	Up
Rps24	DCN	1	1315	-0.1557	0.05755	0.0007097	0.1208	None	0.3026	0.05742	1.006e-08	5.958e-06	Up	0.4969	0.05757	5.686e-19	5.264e-16	Up
Rps25	DCN	1	518.8	-0.08992	0.07758	0.04505	0.9997	None	0.2076	0.08602	0.001707	0.1389	None	0.3833	0.08443	6.186e-07	6.191e-05	Up
Rps26	DCN	1	701.1	-0.1635	0.07261	0.00228	0.2362	None	0.05546	0.06059	0.2246	0.9991	None	0.2668	0.07317	5.06e-05	0.003111	Up
Rps27a	DCN	1	1271	-0.1399	0.06211	0.002921	0.2809	None	0.2801	0.06197	5.763e-07	0.0002033	Up	0.4638	0.06179	6.07e-15	2.997e-12	Up
Rps27l	DCN	1	124.2	-0.01714	0.06176	0.5	0.9997	None	0.3372	0.169	0.002089	0.1595	None	0.463	0.1585	0.000248	0.01298	Up
Rps3	DCN	1	675.5	-0.1163	0.07998	0.01915	0.9184	None	0.2519	0.08108	0.000171	0.02174	Up	0.443	0.07984	2.741e-09	4.461e-07	Up
Rps3a1	DCN	1	789.7	-0.144	0.06995	0.004501	0.3899	None	0.323	0.06912	2.249e-07	9.797e-05	Up	0.5179	0.06919	6.009e-15	2.997e-12	Up
Rps4x	DCN	1	586.3	-0.009937	0.04813	0.7615	0.9997	None	0.33	0.07533	8.732e-07	0.0002812	Up	0.3562	0.07491	2.499e-07	2.742e-05	Up
Rps5	DCN	1	539	-0.09027	0.07654	0.04312	0.9997	None	0.3218	0.08264	7.275e-06	0.001562	Up	0.4888	0.08211	2.283e-10	4.764e-08	Up
Rps6	DCN	1	564.2	-0.1282	0.08549	0.01424	0.7725	None	0.2563	0.08509	0.0002244	0.02747	Up	0.4654	0.08372	2.424e-09	4.08e-07	Up
Rps7	DCN	1	809.9	-0.1026	0.06571	0.02195	0.9589	None	0.2669	0.06857	9.053e-06	0.001889	Up	0.4224	0.06825	5.639e-11	1.247e-08	Up
Rps8	DCN	1	1104	-0.1966	0.06097	0.0001052	0.02886	Down	0.3632	0.06027	1.222e-10	1.293e-07	Up	0.5948	0.06074	9.185e-24	2.721e-20	Up
Rps9	DCN	1	671.3	-0.08706	0.06654	0.04322	0.9997	None	0.4183	0.0707	1.889e-10	1.646e-07	Up	0.5617	0.07121	2.406e-16	1.55e-13	Up
Rpsa	DCN	1	845.5	-0.07099	0.05818	0.07314	0.9997	None	0.3375	0.06581	2.217e-08	1.173e-05	Up	0.4549	0.0659	4.87e-13	1.678e-10	Up
Rtl8a	DCN	1	487.9	-0.01461	0.05114	0.6529	0.9997	None	0.2746	0.08572	0.0001099	0.01507	Up	0.3189	0.08413	2.096e-05	0.00156	Up
Rtl8b	DCN	1	204.8	-0.1884	0.1364	0.008084	0.5813	None	0.151	0.1236	0.02579	0.7166	None	0.5	0.1227	3.44e-06	0.0003041	Up
S100b	DCN	1	827.4	0.3735	0.07045	6.658e-09	7.044e-06	Up	-0.03913	0.05991	0.3798	0.9991	None	-0.4419	0.0748	3.412e-10	6.738e-08	Down
Scand1	DCN	1	156.2	-0.09553	0.1301	0.03374	0.9997	None	0.08862	0.1082	0.09072	0.9991	None	0.4179	0.1433	0.0002888	0.0148	Up
Scn1b	DCN	1	560.1	-0.2968	0.08216	1.736e-05	0.006122	Down	-0.03089	0.06194	0.4961	0.9991	None	0.2437	0.08481	0.0008282	0.03446	Up
Sec14l5	DCN	1	47.8	0.03875	0.0785	0.08017	0.9997	None	-0.0904	0.1557	0.02135	0.6519	None	-0.8177	0.2782	0.0001647	0.008969	Down
Selenow	DCN	1	1055	0.009266	0.04559	0.7776	0.9997	None	0.3574	0.06628	5.046e-09	3.25e-06	Up	0.3419	0.06599	2.983e-08	3.946e-06	Up
Serf1	DCN	0	71.07	-0.02248	0.06651	0.2982	0.9997	None	0.222	0.3	0.01321	0.5095	None	0.5383	0.2149	0.0006642	0.02885	Up
Serf2	DCN	1	797	-0.05373	0.05515	0.1475	0.9997	None	0.1885	0.06954	0.0009382	0.08741	None	0.2929	0.06884	3.491e-06	0.0003042	Up
Serp2	DCN	1	144.7	-0.06103	0.09294	0.06783	0.9997	None	0.3558	0.1599	0.001248	0.1101	None	0.6495	0.151	1.027e-06	0.0001001	Up
Sh3bgrl3	DCN	1	206.6	-0.000186	0.05664	0.9896	0.9997	None	0.318	0.1317	0.0008804	0.08307	None	0.3329	0.1264	0.0009398	0.03814	Up
Shf	DCN	1	34.16	-0.01741	0.06619	0.2991	0.9997	None	-0.8683	0.34	0.0004258	0.04673	Down	-0.4904	0.4206	0.008162	0.1972	None
Skp1a	DCN	1	383.1	-0.04043	0.06073	0.2493	0.9997	None	0.1724	0.0952	0.008887	0.4019	None	0.2933	0.09321	0.000252	0.01314	Up
Slc17a7	DCN	1	33.19	0.01703	0.06603	0.3159	0.9997	None	-1.367	0.3666	1.104e-05	0.002209	Down	-1.642	0.3584	3.238e-07	3.475e-05	Down
Slc1a3	DCN	1	144.2	0.5752	0.1478	4.45e-06	0.002197	Up	0.02545	0.0798	0.503	0.9991	None	-0.4492	0.1629	0.0004308	0.02013	Down
Slc1a6	DCN	1	21.95	0.03798	0.08085	0.01245	0.7204	None	-0.03863	0.09747	0.05582	0.9153	None	-1.344	0.4295	9.055e-05	0.005281	Down
Slc25a18	DCN	0	103.5	-0.009137	0.06106	0.6877	0.9997	None	0.3351	0.1979	0.00354	0.2196	None	0.4338	0.1807	0.001125	0.0441	Up
Slc25a5	DCN	1	599.9	-0.1692	0.07711	0.002369	0.2403	None	0.05358	0.06261	0.2436	0.9991	None	0.2756	0.07751	6.765e-05	0.004074	Up
Slc2a1	DCN	1	260.4	0.4071	0.1062	6.26e-06	0.002649	Up	0.1261	0.112	0.0413	0.8495	None	-0.169	0.1055	0.03487	0.4692	None
Slc44a1	DCN	0	192.7	0.05883	0.08104	0.102	0.9997	None	-0.124	0.1262	0.04617	0.8663	None	-0.3666	0.1326	0.0005924	0.02643	Down
Slc6a1	DCN	1	502	0.2533	0.08366	0.0001539	0.03931	Up	0.2068	0.08913	0.00216	0.1619	None	-0.02879	0.07165	0.6395	0.9789	None
Smdt1	DCN	1	656.3	-0.09053	0.06952	0.0398	0.9997	None	0.3281	0.07432	7.5e-07	0.0002525	Up	0.4804	0.0742	8.439e-12	2.359e-09	Up
Smim12	DCN	1	153.1	-0.06054	0.0897	0.08011	0.9997	None	0.1279	0.1387	0.04073	0.8495	None	0.4305	0.1474	0.0002726	0.01412	Up
Snf8	DCN	0	112.8	-0.06629	0.1023	0.05085	0.9997	None	0.08851	0.1191	0.07426	0.9937	None	0.4702	0.1692	0.0003724	0.01814	Up
Snhg11	DCN	1	457.1	0.138	0.0826	0.009897	0.6459	None	-0.2212	0.09135	0.001529	0.1294	None	-0.4396	0.08728	4.62e-08	5.681e-06	Down
Snrnp70	DCN	1	75.41	0.3213	0.2161	0.003771	0.3469	None	-0.06847	0.1126	0.0883	0.9991	None	-0.7221	0.2074	2.867e-05	0.002003	Down
Snrpn	DCN	1	878.2	-0.1044	0.0677	0.02175	0.9532	None	0.1481	0.06981	0.006553	0.333	None	0.3144	0.07021	1.134e-06	0.0001098	Up
Sort1	DCN	1	165.2	0.1558	0.1538	0.01454	0.7831	None	-0.1167	0.1317	0.05065	0.8912	None	-0.4915	0.1423	4.12e-05	0.00269	Down
Sparcl1	DCN	0	2910	-0.02661	0.03771	0.3816	0.9997	None	0.09993	0.04458	0.01064	0.4554	None	0.144	0.04509	0.0007168	0.0306	Up
Sptbn2	DCN	0	100.4	0.05101	0.08503	0.08129	0.9997	None	-0.09859	0.1419	0.05008	0.8912	None	-0.5094	0.1916	0.0004974	0.0226	Down
Srcin1	DCN	0	59.39	0.02487	0.06776	0.2487	0.9997	None	-0.1261	0.2309	0.01846	0.5942	None	-0.5982	0.2503	0.0008755	0.03613	Down
Srp9	DCN	1	227.2	-0.06997	0.08747	0.07831	0.9997	None	0.2453	0.1212	0.003059	0.2014	None	0.4622	0.1158	5.35e-06	0.0004528	Up
Srsf5	DCN	1	185	0.09565	0.1171	0.0379	0.9997	None	-0.2255	0.1551	0.009144	0.4081	None	-0.5228	0.1367	9.629e-06	0.0007878	Down
Sst	DCN	1	20.4	0.02599	0.07215	0.02171	0.9532	None	1.208	0.4582	0.0002759	0.03322	Up	0.07323	0.1551	0.1386	0.7911	None
Stmn3	DCN	1	1352	-0.1695	0.0576	0.0003372	0.07239	None	0.1084	0.05603	0.01772	0.5893	None	0.3169	0.05836	8.789e-09	1.289e-06	Up
Stub1	DCN	1	206.1	-0.00859	0.05684	0.7607	0.9997	None	0.281	0.1301	0.001868	0.1464	None	0.3341	0.1238	0.0007764	0.03277	Up
Sult4a1	DCN	1	288.8	-0.02148	0.05726	0.497	0.9997	None	0.2713	0.1107	0.001011	0.09355	None	0.3546	0.1069	0.0001016	0.005811	Up
Swi5	DCN	1	342.9	-0.03623	0.06012	0.2913	0.9997	None	0.2639	0.09901	0.0005952	0.06209	None	0.3734	0.09657	1.201e-05	0.000946	Up
Taf10	DCN	1	138.3	-0.21	0.182	0.008405	0.5986	None	0.07166	0.09966	0.1355	0.9991	None	0.4866	0.152	9.656e-05	0.005566	Up
Tagln3	DCN	1	388.1	-0.2308	0.09372	0.000812	0.1322	None	0.07262	0.07591	0.1487	0.9991	None	0.3795	0.09394	5.753e-06	0.0004842	Up
Tesc	DCN	0	62.77	-0.0711	0.1268	0.01317	0.7364	None	0.04349	0.09322	0.2071	0.9991	None	0.6258	0.2376	0.0004096	0.01957	Up
Timm13	DCN	1	305.7	-0.1292	0.1049	0.01905	0.9184	None	0.2204	0.1043	0.003076	0.2016	None	0.4657	0.1011	3.5e-07	3.717e-05	Up
Timm8b	DCN	1	537.8	-0.1269	0.08213	0.01403	0.7709	None	0.1038	0.07628	0.05111	0.8912	None	0.3112	0.08255	2.385e-05	0.00174	Up
Tle5	DCN	1	674.3	-0.4855	0.06813	5.616e-14	1.664e-10	Down	-0.02049	0.05506	0.6355	0.9991	None	0.4513	0.07317	6.615e-11	1.441e-08	Up
Tma7	DCN	1	416.9	-0.1269	0.08928	0.01641	0.8612	None	0.06737	0.07244	0.171	0.9991	None	0.2761	0.08963	0.0003491	0.0173	Up
Tmem147	DCN	0	235.7	-0.1289	0.1202	0.02101	0.9532	None	0.06403	0.083	0.1894	0.9991	None	0.3231	0.1157	0.0006318	0.02785	Up
Tmem160	DCN	1	128.5	-0.3382	0.1635	0.001422	0.1708	None	0.0703	0.1003	0.1357	0.9991	None	0.5903	0.1568	1.027e-05	0.0008226	Up
Tomm20	DCN	1	309.8	-0.05955	0.07282	0.1228	0.9997	None	0.1873	0.1033	0.007485	0.3626	None	0.3549	0.1005	4.702e-05	0.002956	Up
Tomm5	DCN	1	258.8	-0.2361	0.1183	0.002345	0.2395	None	0.4021	0.1096	1.4e-05	0.002765	Up	0.7354	0.1094	1.146e-12	3.689e-10	Up
Tomm6	DCN	1	455.7	-0.1161	0.08626	0.02166	0.9532	None	0.107	0.08111	0.05128	0.8912	None	0.3146	0.08778	4.779e-05	0.002974	Up
Tpi1	DCN	0	833.5	-0.07075	0.05777	0.0711	0.9997	None	0.08183	0.06071	0.08074	0.9991	None	0.2031	0.06611	0.0006336	0.02785	Up
Tppp3	DCN	0	212.6	0.0678	0.08644	0.08505	0.9997	None	-0.09819	0.1072	0.07775	0.9975	None	-0.332	0.1263	0.0009968	0.04001	Down
Tpt1	DCN	1	1529	-0.1425	0.062	0.002578	0.258	None	0.3205	0.06125	1.414e-08	8.059e-06	Up	0.5042	0.06113	1.398e-17	1.035e-14	Up
Trnp1	DCN	1	377.6	-0.3462	0.1105	8.314e-05	0.02509	Down	-0.1307	0.1095	0.03681	0.8301	None	0.123	0.1005	0.1035	0.7273	None
Tsc22d3	DCN	1	406	0.2664	0.08852	0.0001528	0.03931	Up	0.35	0.09221	9.651e-06	0.001986	Up	0.05666	0.07599	0.3731	0.9453	None
Tuba1b	DCN	1	856.4	-0.1937	0.06583	0.0002795	0.0637	None	0.02187	0.05305	0.6046	0.9991	None	0.2378	0.06712	9.218e-05	0.005355	Up
Tusc2	DCN	0	125.3	-0.1458	0.2143	0.01661	0.8624	None	0.05757	0.09278	0.1908	0.9991	None	0.4419	0.1624	0.0004724	0.0216	Up
Ube2m	DCN	1	292.8	-0.3896	0.1071	1.355e-05	0.00502	Down	-0.03191	0.07099	0.4716	0.9991	None	0.3077	0.1137	0.0008813	0.03626	Up
Ube2s	DCN	1	172.9	-0.04479	0.07298	0.1658	0.9997	None	0.2116	0.1442	0.00967	0.4235	None	0.4239	0.1337	0.0001264	0.007038	Up
Uchl1	DCN	1	1455	-0.1391	0.05934	0.002562	0.258	None	0.125	0.05843	0.008879	0.4019	None	0.3082	0.05971	4.312e-08	5.459e-06	Up
Uchl5	DCN	1	131.3	-0.01917	0.0621	0.4639	0.9997	None	0.2957	0.1686	0.003761	0.2255	None	0.4331	0.1553	0.000399	0.01925	Up
Ugt8a	DCN	0	211.2	0.03681	0.06541	0.2531	0.9997	None	-0.1972	0.14	0.01234	0.4925	None	-0.3648	0.1285	0.0004581	0.02114	Down
Uqcc2	DCN	1	451.9	-0.1176	0.08786	0.02128	0.9532	None	0.2055	0.08986	0.002357	0.1695	None	0.4149	0.08809	2.471e-07	2.732e-05	Up
Uqcr10	DCN	1	923.2	-0.1673	0.06607	0.001098	0.1535	None	0.02505	0.05323	0.5543	0.9991	None	0.2193	0.06658	0.0002607	0.01355	Up
Uqcrb	DCN	0	623.5	-0.09105	0.07872	0.04417	0.9997	None	0.0877	0.07519	0.08925	0.9991	None	0.2649	0.08484	0.000331	0.01656	Up
Uqcrfs1	DCN	1	360.5	-0.1108	0.09214	0.02753	0.9997	None	0.121	0.08979	0.03791	0.8381	None	0.3389	0.09478	4.301e-05	0.00277	Up
Uqcrh	DCN	1	1188	-0.07768	0.05711	0.05202	0.9997	None	0.2275	0.06319	3.651e-05	0.005879	Up	0.3515	0.0627	2.719e-09	4.461e-07	Up
Uqcrq	DCN	1	1134	-0.09421	0.05726	0.02306	0.9874	None	0.08038	0.05599	0.073	0.9937	None	0.2179	0.0606	8.874e-05	0.005196	Up
Use1	DCN	1	138.8	-0.03916	0.07191	0.1783	0.9997	None	0.2313	0.1689	0.009225	0.4081	None	0.47	0.1514	0.0001363	0.007532	Up
Usp54	DCN	1	80.61	0.3136	0.2184	0.004274	0.3724	None	-0.02415	0.08303	0.4732	0.9991	None	-0.484	0.208	0.00123	0.04734	Down
Vamp1	DCN	0	795.9	-0.09455	0.06792	0.03491	0.9997	None	0.07249	0.06339	0.126	0.9991	None	0.2243	0.072	0.0004601	0.02116	Up
Vdac1	DCN	1	525.9	-0.02712	0.05356	0.4169	0.9997	None	0.2312	0.08543	0.0006543	0.06684	None	0.3071	0.08348	3.476e-05	0.002353	Up
Vti1b	DCN	1	223.8	-0.0362	0.06536	0.2552	0.9997	None	0.2851	0.1245	0.001377	0.1193	None	0.4331	0.1194	2.456e-05	0.001771	Up
Ypel3	DCN	1	446.1	-0.04223	0.06054	0.2319	0.9997	None	0.1725	0.0917	0.007792	0.3738	None	0.2929	0.08991	0.0001744	0.009428	Up
Zic1	DCN	1	78.6	0.02157	0.06517	0.348	0.9997	None	-1.014	0.2244	3.33e-07	0.0001333	Down	-1.183	0.2212	5.32e-09	8.209e-07	Down
Atp5md	Fourth_ventricle	1	1370	-3.365e-06	0.001443	0.7702	1	None	-0.3488	0.09566	1.453e-05	0.009007	Down	-0.3191	0.09672	5.257e-05	0.0328	Down
Bc1	Fourth_ventricle	1	27.16	1.242e-06	0.001443	0.6605	1	None	1.386	0.3547	4.218e-06	0.003485	Up	1.207	0.3537	2.619e-05	0.01948	Up
Calr	Fourth_ventricle	1	506.9	1.478e-05	0.001443	0.1144	1	None	0.6045	0.1063	6.441e-10	1.369e-06	Up	0.4261	0.1079	4.037e-06	0.004288	Up
Chchd10	Fourth_ventricle	1	1292	-2.217e-05	0.001443	0.04144	1	None	0.2572	0.1031	0.0008425	0.1899	None	0.4745	0.09851	7.64e-08	0.0001623	Up
Cldn11	Fourth_ventricle	1	114.3	5.568e-06	0.001443	0.3518	1	None	-0.4278	0.219	0.001673	0.2927	None	-0.6372	0.197	4.826e-05	0.03263	Down
Creld2	Fourth_ventricle	1	52.35	7.26e-06	0.001443	0.07832	1	None	1.028	0.2565	2.674e-06	0.002478	Up	0.4798	0.3002	0.002781	0.4401	None
Cst3	Fourth_ventricle	0	2546	1.321e-05	0.001443	0.2953	1	None	0.279	0.08719	9.597e-05	0.04922	Up	0.1776	0.08973	0.004313	0.5663	None
Dbp	Fourth_ventricle	1	86.36	-0.8823	0.2038	6.213e-07	0.001578	Down	-0.1488	0.2832	0.01623	0.8866	None	0.2596	0.392	0.008632	0.8229	None
Dusp1	Fourth_ventricle	1	83.97	0.5433	0.2395	0.0006229	0.5019	None	-0.04922	0.09425	0.08977	0.9999	None	-0.9769	0.2196	3.735e-07	0.000463	Down
Eef1a2	Fourth_ventricle	1	112.4	-1.157	0.183	1.189e-11	1.768e-07	Down	-1.446	0.1864	4.292e-16	2.128e-12	Down	-0.03739	0.08032	0.1532	1	None
Ftl1	Fourth_ventricle	1	912.4	-7.614e-06	0.001443	0.3964	1	None	0.3301	0.1261	0.0004621	0.1202	None	0.4432	0.1221	1.368e-05	0.01197	Up
Fxyd1	Fourth_ventricle	1	400.1	-2.171e-05	0.001443	0.6205	1	None	0.6079	0.1612	7.216e-06	0.005366	Up	0.5208	0.1643	6.489e-05	0.03712	Up
Gh	Fourth_ventricle	1	11.84	-8.009	2.692	1.859e-09	1.383e-05	Down	-2.661	0.5608	1.491e-07	0.0002218	Down	0.0204	0.07642	0.0004316	0.1259	None
Gm47283	Fourth_ventricle	1	26.49	3.384	1.273	0.0005677	0.4967	None	7.26	1.274	1.925e-10	4.772e-07	Up	3.297	0.4055	5.07e-17	2.514e-13	Up
Hba-a1	Fourth_ventricle	1	39.49	-1.883e-06	0.001443	0.2337	1	None	2.632	0.6218	9.38e-07	0.0009965	Up	3.455	0.6408	3.242e-09	9.644e-06	Up
Hba-a2	Fourth_ventricle	1	39.12	-3.705e-06	0.001443	0.1857	1	None	2.28	0.3078	8.181e-15	3.042e-11	Up	2.779	0.3319	4.467e-18	3.322e-14	Up
Hbb-bs	Fourth_ventricle	1	106.8	-6.634e-06	0.001443	0.08442	1	None	2.985	0.2135	1.652e-45	2.457e-41	Up	3.447	0.2311	2.383e-51	3.545e-47	Up
Hbb-bt	Fourth_ventricle	1	13.17	-2.884e-07	0.001443	0.8283	1	None	3.291	0.6232	1.346e-08	2.225e-05	Up	3.458	0.6436	9.035e-09	2.24e-05	Up
Hcn2	Fourth_ventricle	1	125.4	-0.8802	0.1949	2.551e-07	0.0009485	Down	-0.8431	0.1946	6.493e-07	0.0007429	Down	0.004567	0.06795	0.853	1	None
Hspa5	Fourth_ventricle	1	593.5	0.2254	0.2055	0.003696	1	None	0.867	0.1268	4.055e-13	1.206e-09	Up	0.4756	0.1307	1.27e-05	0.01181	Up
Hspb1	Fourth_ventricle	1	64.35	4.717e-06	0.001443	0.2902	1	None	0.8561	0.2384	1.368e-05	0.008849	Up	0.5588	0.255	0.0009023	0.2097	None
Ivns1abp	Fourth_ventricle	1	125.6	0.7818	0.181	6.364e-07	0.001578	Up	-0.005977	0.07195	0.8324	0.9999	None	-0.8247	0.1801	2.091e-07	0.0002827	Down
Manf	Fourth_ventricle	1	300.5	0.3941	0.1531	0.0003007	0.2982	None	1.275	0.1312	1.311e-23	9.752e-20	Up	0.7757	0.129	8.794e-11	3.27e-07	Up
Meg3	Fourth_ventricle	1	319.8	1.482e-06	0.001443	0.8575	1	None	-0.6101	0.1372	4.136e-07	0.0005533	Down	-0.6348	0.1367	1.597e-07	0.0002628	Down
Ndufb1-ps	Fourth_ventricle	1	446.2	4.49e-06	0.001443	0.6493	1	None	-0.3168	0.1178	0.0003917	0.1158	None	-0.3725	0.1156	6.352e-05	0.03712	Down
Nefh	Fourth_ventricle	1	133.4	-2.251e-05	0.001443	0.000779	0.5517	None	-0.5868	0.1685	2.175e-05	0.01294	Down	-0.02703	0.07194	0.3712	1	None
Nefl	Fourth_ventricle	1	241.7	-0.2336	0.2635	0.003803	1	None	-0.5465	0.1507	1.298e-05	0.008775	Down	-0.05071	0.0842	0.1408	1	None
Penk	Fourth_ventricle	1	116.4	-1.273e-05	0.001443	0.01407	1	None	-0.9567	0.2169	4.465e-07	0.0005533	Down	-0.2356	0.7642	0.008775	0.8313	None
Pikfyve	Fourth_ventricle	0	31.01	8.337e-06	0.001443	0.009193	1	None	1.077	0.3523	8.764e-05	0.04655	Up	0.02427	0.07595	0.17	1	None
Rpl10	Fourth_ventricle	1	445.3	-1.035e-05	0.001443	0.2498	1	None	0.2687	0.128	0.001983	0.3183	None	0.4262	0.1216	2.225e-05	0.01742	Up
Rpl13a	Fourth_ventricle	1	1066	-1.032e-05	0.001443	0.331	1	None	0.3235	0.1037	0.0001069	0.05299	None	0.4291	0.1016	1.264e-06	0.001446	Up
Rpl14	Fourth_ventricle	1	579.3	-7.471e-06	0.001443	0.5259	1	None	0.3	0.1126	0.0004493	0.1202	None	0.3761	0.1105	3.437e-05	0.02434	Up
Rps2	Fourth_ventricle	1	467.4	-1.617e-05	0.001443	0.0771	1	None	0.3197	0.1218	0.0004739	0.1202	None	0.5447	0.1165	1.466e-07	0.0002628	Up
Sdf2l1	Fourth_ventricle	1	48.31	6.838e-06	0.001443	0.07313	1	None	1.436	0.2648	3.008e-09	5.593e-06	Up	0.9068	0.2608	2.041e-05	0.01687	Up
Serpini1	Fourth_ventricle	1	91.31	-1.838e-05	0.001443	0.03532	1	None	-0.862	0.2083	1.503e-06	0.00149	Down	-0.3242	0.311	0.006165	0.695	None
Slc6a20a	Fourth_ventricle	1	104.6	0.929	0.196	9.138e-08	0.000453	Up	0.5844	0.2121	0.0002266	0.0822	None	-0.052	0.09077	0.09004	1	None
Sod3	Fourth_ventricle	1	109.1	7.232e-07	0.001443	0.8951	1	None	0.7538	0.1887	2.832e-06	0.002478	Up	0.7263	0.1892	5.247e-06	0.005203	Up
Tle5	Fourth_ventricle	0	349.7	-0.4182	0.1249	2.836e-05	0.04687	Down	-0.1059	0.1109	0.04986	0.9999	None	0.1315	0.1333	0.02558	1	None
Tpt1	Fourth_ventricle	1	1647	-7.076e-06	0.001443	0.4738	1	None	0.4224	0.1101	6.58e-06	0.005151	Up	0.5047	0.1087	1.767e-07	0.0002628	Up
Trnp1	Fourth_ventricle	1	111.5	-0.673	0.1849	1.033e-05	0.02195	Down	-0.6732	0.1837	1.044e-05	0.007391	Down	0.0001335	0.06714	0.9956	1	None
Vamp1	Fourth_ventricle	1	206	-1.947e-05	0.001443	0.001683	0.8166	None	-0.5698	0.1831	7.63e-05	0.04203	Down	-0.02194	0.07058	0.4133	1	None
Xbp1	Fourth_ventricle	1	115.9	6.338e-06	0.001443	0.2532	1	None	0.6351	0.1976	5.366e-05	0.0307	Up	0.3556	0.2312	0.003625	0.5181	None
Actb	Granular_layer	1	107.6	0.013	0.05363	0.4561	0.9999	None	-0.6013	0.1536	3.661e-06	0.01388	Down	-0.7174	0.1683	8.896e-07	0.001265	Down
Aldoc	Granular_layer	1	164.1	0.4876	0.1409	2.17e-05	0.02058	Up	0.03077	0.0574	0.1312	0.9994	None	-0.2884	0.1402	0.002833	0.5341	None
Atp5k	Granular_layer	1	48.26	0.00948	0.05413	0.4779	0.9999	None	-0.6181	0.2188	0.0001647	0.1561	None	-0.7696	0.2399	5.099e-05	0.04463	Down
Car8	Granular_layer	1	50.85	1.193	0.2265	6.244e-09	7.104e-05	Up	0.4248	0.2645	0.002649	0.964	None	-0.5192	0.228	0.0008656	0.2984	None
Cdk11b	Granular_layer	1	29.84	0.003542	0.0538	0.7248	0.9999	None	-0.9475	0.2837	3.157e-05	0.06823	None	-1.024	0.3171	4.54e-05	0.04398	Down
Eef1a2	Granular_layer	1	29.82	-1.545	0.3317	2.194e-07	0.0005765	Down	-1.411	0.2442	3.919e-10	2.229e-06	Down	0.01588	0.1001	0.5872	0.999	None
Ewsr1	Granular_layer	1	130.5	0.2757	0.1972	0.004037	0.9999	None	-0.4548	0.1532	0.0001061	0.1207	None	-0.9109	0.1524	1.016e-10	2.891e-07	Down
Fam107a	Granular_layer	1	24.67	1.095	0.3321	3.5e-05	0.03063	Up	0.005481	0.04905	0.502	0.9994	None	-0.8831	0.3229	0.0002139	0.1217	None
Fus	Granular_layer	1	55.61	0.005627	0.05313	0.6905	0.9999	None	-0.6623	0.1955	2.696e-05	0.06823	None	-0.7273	0.2224	4.235e-05	0.04398	Down
Gm47283	Granular_layer	1	45.64	0.01357	0.05718	0.000702	0.4992	None	8.485	1.27	1.08e-13	1.229e-09	Up	4.413	0.4676	2.649e-21	3.014e-17	Up
Gng13	Granular_layer	1	57.34	0.9367	0.2075	2.534e-07	0.0005765	Up	-0.02221	0.05501	0.07819	0.9994	None	-1.306	0.2032	5.851e-12	3.328e-08	Down
Itpr1	Granular_layer	1	59.19	0.8398	0.2177	4.242e-06	0.005362	Up	0.02534	0.05703	0.06376	0.9994	None	-0.4385	0.2272	0.002042	0.483	None
Ivns1abp	Granular_layer	1	49.14	1.098	0.2224	3.298e-08	0.0001876	Up	-0.003508	0.04817	0.7485	0.9994	None	-1.176	0.2145	1.858e-09	4.229e-06	Down
Mt1	Granular_layer	1	392.3	0.416	0.1053	3.563e-06	0.005067	Up	-0.08526	0.1126	0.02499	0.9994	None	-0.6449	0.1012	1.022e-11	3.878e-08	Down
Mt2	Granular_layer	1	61.55	0.9107	0.2011	2.493e-07	0.0005765	Up	-0.004197	0.04787	0.734	0.9994	None	-0.9841	0.1937	1.771e-08	3.358e-05	Down
Pcp2	Granular_layer	1	80.55	0.6556	0.1864	1.627e-05	0.01817	Up	0.005463	0.0475	0.6827	0.9994	None	-0.5909	0.1801	4.638e-05	0.04398	Down
Pcp4	Granular_layer	1	83.88	0.7727	0.1823	9.209e-07	0.001497	Up	0.4033	0.1805	0.000817	0.4042	None	-0.1525	0.1666	0.03956	0.999	None
Slc15a2	Granular_layer	1	8.767	3.201	0.7009	6.31e-07	0.001197	Up	0.01361	0.05196	0.003253	0.9994	None	-1.019	0.5885	0.001925	0.483	None
Slc1a3	Granular_layer	1	44.18	0.9228	0.2644	1.756e-05	0.01817	Up	-8.068e-05	0.04826	0.9968	0.9994	None	-0.9347	0.2542	9.623e-06	0.01216	Down
Snhg11	Granular_layer	1	410.4	0.1911	0.1321	0.005604	0.9999	None	-0.1816	0.1267	0.00534	0.9994	None	-0.5272	0.1079	5.853e-08	9.512e-05	Down
0610010K14Rik	Medulla	1	211.2	0.03712	0.07225	0.3343	0.9852	None	0.3428	0.1244	0.0003317	0.01361	Up	0.2316	0.1151	0.006387	0.08432	None
0610012G03Rik	Medulla	1	605.6	-0.1967	0.07202	0.0006778	0.02899	Down	0.1661	0.06971	0.00272	0.0737	None	0.4161	0.06783	7.598e-11	5.832e-09	Up
1010001B22Rik	Medulla	1	6.342	-0.03867	0.09339	0.0001536	0.008347	None	-0.0007318	0.08333	0.9425	0.9926	None	4.035	1.35	0.0001734	0.004449	Up
1110008P14Rik	Medulla	1	1610	-0.08018	0.04795	0.03544	0.5067	None	0.2922	0.05021	4.04e-10	6.504e-08	Up	0.4039	0.04909	1.944e-17	2.538e-15	Up
1110065P20Rik	Medulla	1	551.9	-0.1319	0.07463	0.01374	0.2853	None	0.149	0.07375	0.007429	0.1583	None	0.3467	0.07209	1.639e-07	8.49e-06	Up
1500011B03Rik	Medulla	1	662.1	0.1308	0.0661	0.009444	0.2219	None	0.3028	0.06682	4.694e-07	4.31e-05	Up	0.1369	0.06098	0.01027	0.1184	None
1700037H04Rik	Medulla	1	288.8	0.008432	0.06151	0.8257	0.9982	None	0.3103	0.1028	0.0001648	0.007345	Up	0.2967	0.09685	0.0002474	0.006031	Up
1810037I17Rik	Medulla	1	961.8	-0.01232	0.04678	0.743	0.9982	None	0.1336	0.05842	0.00556	0.13	None	0.16	0.05623	0.001514	0.02731	Up
2010001A14Rik	Medulla	1	176.4	-0.4585	0.1335	2.84e-05	0.001914	Down	-0.06833	0.09158	0.1465	0.7826	None	0.2581	0.135	0.006245	0.08276	None
2300009A05Rik	Medulla	1	334.2	-0.3193	0.0949	4.758e-05	0.003023	Down	0.0163	0.0617	0.7097	0.9815	None	0.3615	0.09138	7.228e-06	0.0002675	Up
2310009B15Rik	Medulla	1	256.4	-0.1097	0.1028	0.04713	0.5866	None	0.08094	0.08716	0.1151	0.7245	None	0.316	0.1058	0.0002897	0.0069	Up
4833439L19Rik	Medulla	0	421.2	-0.06954	0.07008	0.1311	0.8402	None	0.07478	0.07111	0.1242	0.7428	None	0.2098	0.08078	0.001899	0.03279	Up
6330403K07Rik	Medulla	1	1755	0.2392	0.04751	4.306e-08	4.857e-06	Up	0.3374	0.04749	8.432e-14	2.087e-11	Up	0.08503	0.04363	0.03578	0.2786	None
AC149090.1	Medulla	1	258.3	0.5353	0.1038	1.361e-08	1.623e-06	Up	0.1082	0.1012	0.0567	0.5488	None	-0.3254	0.1014	0.0001365	0.003603	Down
AW047730	Medulla	1	267.9	-0.2066	0.116	0.005343	0.1459	None	0.05695	0.07676	0.2221	0.8725	None	0.3645	0.1054	4.834e-05	0.001449	Up
Abhd17a	Medulla	1	616.3	-0.04283	0.05699	0.302	0.9774	None	0.2354	0.07239	0.0001156	0.005431	Up	0.3172	0.06934	5.686e-07	2.604e-05	Up
Abhd2	Medulla	1	83.84	-0.1034	0.1676	0.02689	0.4289	None	-0.5832	0.215	0.0002605	0.01102	Down	-0.1001	0.1394	0.1272	0.5622	None
Abhd8	Medulla	1	856.6	0.0321	0.05034	0.4086	0.9964	None	0.2219	0.06316	4.933e-05	0.002664	Up	0.1767	0.05949	0.0008724	0.01768	Up
Ablim1	Medulla	1	199.9	0.004349	0.06427	0.9027	0.9992	None	-0.3075	0.1299	0.001018	0.03355	Down	-0.3368	0.1208	0.0004788	0.01064	Down
Acly	Medulla	1	973.7	0.0706	0.04982	0.07865	0.7277	None	-0.09265	0.0533	0.03222	0.4122	None	-0.1947	0.05357	7.233e-05	0.002071	Down
Aco2	Medulla	0	1487	-0.03386	0.03964	0.3223	0.9819	None	-0.1269	0.0454	0.001427	0.04379	Down	-0.09082	0.04302	0.02322	0.2134	None
Acot13	Medulla	1	733.9	-0.1531	0.06604	0.003172	0.1008	None	0.1175	0.0629	0.0162	0.2707	None	0.3205	0.06343	5.219e-08	2.885e-06	Up
Acrbp	Medulla	1	49.68	0.6452	0.2687	0.0005782	0.02577	Up	0.04306	0.09424	0.1351	0.7655	None	-0.1514	0.2021	0.04749	0.3329	None
Actb	Medulla	1	3653	-0.1489	0.03055	2.277e-07	2.261e-05	Down	-0.1528	0.03096	1.837e-07	1.952e-05	Down	-0.003276	0.0295	0.907	0.984	None
Actn4	Medulla	0	152.7	0.1162	0.1361	0.03921	0.5348	None	-0.04202	0.08184	0.294	0.9222	None	-0.3345	0.144	0.001621	0.02893	Down
Actr1b	Medulla	0	641.1	0.1043	0.06471	0.02951	0.4571	None	0.1787	0.06878	0.001322	0.04121	Up	0.05585	0.05789	0.2702	0.7432	None
Acyp2	Medulla	1	659.7	-0.03779	0.05585	0.3481	0.9868	None	0.1322	0.07069	0.0138	0.2406	None	0.2089	0.06916	0.0005211	0.01151	Up
Adam22	Medulla	0	279.6	0.1394	0.1016	0.02156	0.3787	None	-0.02518	0.06662	0.5367	0.9691	None	-0.2289	0.09786	0.003122	0.04927	Down
Adamts1	Medulla	1	36.16	-0.8244	0.3287	0.0003975	0.01883	Down	-0.06001	0.1122	0.0341	0.4215	None	0.06548	0.1334	0.157	0.6147	None
Adcy1	Medulla	1	257.1	0.0872	0.09068	0.08116	0.7334	None	-0.1227	0.1078	0.04019	0.4567	None	-0.346	0.1072	0.0001152	0.003085	Down
Adcyap1	Medulla	1	103.8	0.5993	0.1901	6.807e-05	0.004045	Up	-0.01375	0.07799	0.6642	0.9815	None	-0.696	0.1845	8.36e-06	0.0003033	Down
Adcyap1r1	Medulla	1	356	0.08896	0.07948	0.07376	0.706	None	-0.08613	0.08057	0.09347	0.6698	None	-0.2632	0.08885	0.0004275	0.009669	Down
Add2	Medulla	0	219.2	0.1006	0.1057	0.05842	0.6379	None	-0.06255	0.08576	0.179	0.8317	None	-0.3054	0.1188	0.00103	0.02018	Down
Adgrg2	Medulla	0	19.83	0.01896	0.08009	0.2683	0.9713	None	-0.04094	0.09725	0.02975	0.3927	None	-0.9864	0.457	0.001045	0.02045	Down
Adipor2	Medulla	1	386.5	0.4422	0.09451	1.631e-07	1.648e-05	Up	0.2314	0.1014	0.001779	0.05229	None	-0.1393	0.08541	0.03522	0.2761	None
Aebp1	Medulla	1	44.53	-0.6029	0.325	0.001754	0.06295	None	0.03717	0.09019	0.1906	0.8429	None	1.019	0.2716	8.099e-06	0.0002951	Up
Ahi1	Medulla	1	612.6	0.3208	0.07635	1.814e-06	0.0001566	Up	0.1117	0.07443	0.03554	0.4308	None	-0.1613	0.07161	0.007478	0.09441	None
Aimp1	Medulla	0	325.8	-0.03791	0.06781	0.3536	0.9876	None	0.121	0.09844	0.03998	0.4555	None	0.2409	0.0999	0.002354	0.03906	Up
Aip	Medulla	1	512.3	-0.1169	0.07337	0.02368	0.3996	None	0.1103	0.07088	0.03265	0.4124	None	0.2922	0.07255	7.366e-06	0.0002714	Up
Ajap1	Medulla	0	121.2	0.0352	0.07756	0.319	0.9819	None	-0.1086	0.144	0.04536	0.4869	None	-0.3547	0.1663	0.0023	0.03832	Down
Akap8l	Medulla	0	218.8	0.05613	0.07837	0.1936	0.9213	None	-0.115	0.1115	0.04954	0.5121	None	-0.3025	0.1152	0.0008933	0.01802	Down
Akr1a1	Medulla	1	1478	-0.01486	0.03867	0.6664	0.9982	None	0.1408	0.04457	0.0003777	0.01512	Up	0.165	0.04299	4.334e-05	0.001321	Up
Aktip	Medulla	1	648.3	-0.07003	0.06043	0.1149	0.8039	None	0.1105	0.06577	0.02689	0.3709	None	0.2285	0.06645	0.0001113	0.003005	Up
Aldh1a1	Medulla	1	837.1	-0.1917	0.05954	0.0001545	0.00837	Down	0.02123	0.04806	0.5999	0.9756	None	0.2288	0.05752	1.315e-05	0.0004542	Up
Aldh1a2	Medulla	1	16.84	0.008216	0.07839	0.4987	0.9982	None	1.882	0.4851	5.417e-06	0.0003727	Up	1.536	0.4527	2.96e-05	0.000942	Up
Alkbh6	Medulla	0	258.6	-0.114	0.1034	0.04194	0.5517	None	0.03856	0.07062	0.3787	0.9533	None	0.2414	0.1049	0.00309	0.04898	Up
Alyref	Medulla	1	143.3	-0.5946	0.1463	2.147e-06	0.0001826	Down	-0.4657	0.1519	9.823e-05	0.00481	Down	0.0478	0.09833	0.436	0.8607	None
Amy1	Medulla	1	70.45	0.03364	0.08179	0.2546	0.9591	None	-0.1049	0.1751	0.02316	0.3386	None	-0.5674	0.2254	0.0005537	0.01206	Down
Anapc10	Medulla	1	105.1	-0.01825	0.07368	0.5542	0.9982	None	0.2466	0.2201	0.009937	0.1932	None	0.416	0.178	0.001156	0.02213	Up
Anapc11	Medulla	1	706	0.0316	0.05102	0.4468	0.9982	None	0.247	0.06438	1.194e-05	0.0007587	Up	0.2043	0.0608	0.0001823	0.004642	Up
Ank2	Medulla	1	1066	0.1566	0.05391	0.000616	0.02681	Up	0.02002	0.04599	0.601	0.9756	None	-0.1348	0.0513	0.003477	0.05365	None
Anln	Medulla	1	387.7	0.3288	0.08832	1.183e-05	0.0008494	Up	0.06397	0.07215	0.1786	0.8317	None	-0.2124	0.08402	0.002246	0.03766	Down
Ano2	Medulla	1	16.31	0.0157	0.07932	0.3249	0.9819	None	-0.06473	0.125	0.0009554	0.03194	None	-1.735	0.4956	2.469e-05	0.0008028	Down
Ano8	Medulla	1	82.82	-1.007	0.1777	6.861e-10	1.025e-07	Down	-1.147	0.1844	2.498e-11	4.761e-09	Down	-0.04001	0.1073	0.4717	0.8791	None
Ap1s1	Medulla	1	535.3	-0.01671	0.05482	0.6736	0.9982	None	0.3495	0.07536	2.471e-07	2.498e-05	Up	0.3861	0.07253	9.65e-09	5.904e-07	Up
Ap2a2	Medulla	1	360.9	0.1895	0.1001	0.005035	0.1414	None	-0.0331	0.06694	0.4472	0.961	None	-0.2834	0.09459	0.0003121	0.007278	Down
Ap2s1	Medulla	1	1109	-0.01069	0.04423	0.7666	0.9982	None	0.2561	0.05405	2.14e-07	2.218e-05	Up	0.2757	0.05214	1.874e-08	1.11e-06	Up
Ap4s1	Medulla	0	277.8	-0.04149	0.06918	0.3163	0.9808	None	0.1294	0.1008	0.03283	0.4124	None	0.2587	0.1002	0.00133	0.02477	Up
Apba1	Medulla	1	268.6	0.1338	0.1079	0.02679	0.4284	None	-0.05816	0.07921	0.2086	0.8559	None	-0.3051	0.1063	0.0004325	0.009757	Down
Aplp1	Medulla	1	3641	-0.05986	0.03093	0.03483	0.5016	None	0.1727	0.03219	1.518e-08	1.951e-06	Up	0.2429	0.03153	2.667e-15	2.941e-13	Up
Apod	Medulla	1	2862	0.1954	0.05562	5.456e-05	0.003427	Up	0.21	0.0557	2.042e-05	0.001222	Up	0.01149	0.0488	0.8032	0.9715	None
Apoe	Medulla	1	6319	-0.2228	0.02497	5.528e-20	3.055e-17	Down	-0.02292	0.02392	0.3175	0.9281	None	0.1988	0.02474	2.54e-16	3.051e-14	Up
Apoo	Medulla	1	366.4	-0.1219	0.08725	0.02807	0.4423	None	0.06012	0.06948	0.1995	0.8519	None	0.2575	0.08598	0.0004026	0.009181	Up
Aqp4	Medulla	1	670.5	-0.2606	0.0698	1.563e-05	0.001103	Down	-0.08088	0.0624	0.08305	0.6435	None	0.1459	0.06625	0.009916	0.1153	None
Arf5	Medulla	1	607.3	-0.1237	0.06803	0.01426	0.2934	None	0.1962	0.06845	0.0005162	0.01954	Up	0.3737	0.06596	1.458e-09	1.007e-07	Up
Arglu1	Medulla	1	243.9	0.03642	0.06815	0.3724	0.9946	None	-0.2116	0.1194	0.005972	0.136	None	-0.3328	0.1082	0.0002027	0.005086	Down
Arhgdig	Medulla	1	585.2	-0.1299	0.0707	0.01263	0.2707	None	0.1872	0.07069	0.001058	0.03473	Up	0.3742	0.06814	3.957e-09	2.533e-07	Up
Arhgef11	Medulla	1	121.6	0.5429	0.1553	2.213e-05	0.001516	Up	0.06374	0.09808	0.1403	0.7712	None	-0.2918	0.1536	0.005073	0.07104	None
Arhgef3	Medulla	1	158.6	-0.05864	0.08574	0.1636	0.8913	None	-0.367	0.1442	0.0005286	0.01992	Down	-0.1799	0.131	0.03068	0.2535	None
Arid5b	Medulla	1	158.5	0.5537	0.1404	3.95e-06	0.0003149	Up	0.6102	0.1409	7.423e-07	6.41e-05	Up	0.02678	0.08719	0.6711	0.9456	None
Arl2	Medulla	1	700.7	-0.009424	0.0491	0.7825	0.9982	None	0.1874	0.06443	0.0004833	0.01855	Up	0.2134	0.06125	0.0001076	0.002923	Up
Arl3	Medulla	1	653.5	-0.1962	0.06978	0.0005381	0.02433	Down	0.01242	0.05242	0.7521	0.9815	None	0.2266	0.06694	0.0001359	0.003594	Up
Arl6ip4	Medulla	1	274.9	-0.07104	0.08384	0.125	0.8305	None	0.1039	0.09662	0.06213	0.5723	None	0.2969	0.1053	0.0005323	0.01164	Up
Arnt	Medulla	0	46.37	0.0328	0.08381	0.1941	0.9218	None	-0.04884	0.09951	0.08548	0.6452	None	-0.554	0.2955	0.002295	0.03831	Down
Arpc1a	Medulla	1	814.7	-0.06121	0.05371	0.1393	0.8563	None	0.09391	0.05766	0.03869	0.448	None	0.1916	0.05897	0.0003001	0.00711	Up
Arpc4	Medulla	1	480.5	0.1237	0.07845	0.02181	0.3811	None	0.2892	0.08062	2.593e-05	0.001508	Up	0.118	0.07067	0.04424	0.3178	None
Arpc5l	Medulla	1	575.2	-0.02348	0.0535	0.5504	0.9982	None	0.237	0.07165	9.23e-05	0.004596	Up	0.287	0.06833	3.645e-06	0.0001429	Up
Arpp21	Medulla	1	115.7	0.06086	0.09467	0.1263	0.8329	None	-0.1091	0.1479	0.04325	0.4736	None	-0.4635	0.1662	0.0003179	0.007404	Down
Arrdc2	Medulla	1	171.5	0.6292	0.1328	1.084e-07	1.13e-05	Up	0.3364	0.1486	0.001187	0.03777	Up	-0.1648	0.1198	0.03749	0.2866	None
Asb13	Medulla	1	378.5	-0.2693	0.09296	0.0002622	0.01313	Down	-0.1103	0.08553	0.04606	0.49	None	0.1027	0.08049	0.1022	0.5095	None
Asna1	Medulla	1	388.9	-0.1016	0.08321	0.05127	0.6055	None	0.1283	0.08607	0.0271	0.3717	None	0.3198	0.08608	2.25e-05	0.0007372	Up
Atp10a	Medulla	0	32.89	0.05449	0.1039	0.03007	0.4629	None	-0.01657	0.08334	0.4469	0.961	None	-0.5901	0.3568	0.003157	0.04975	Down
Atp11a	Medulla	1	232	0.09274	0.09668	0.07095	0.6923	None	-0.0981	0.1016	0.07257	0.6158	None	-0.3365	0.1122	0.0002544	0.006175	Down
Atp1a1	Medulla	1	557.7	0.03102	0.05491	0.4431	0.9982	None	-0.2061	0.07682	0.0008015	0.02779	Down	-0.272	0.07266	2.616e-05	0.0008438	Down
Atp1a2	Medulla	1	3408	-0.1672	0.03427	1.851e-07	1.86e-05	Down	-0.05346	0.03263	0.07455	0.6206	None	0.1098	0.03343	0.000604	0.01289	Up
Atp2a3	Medulla	0	31.09	0.04804	0.09706	0.04645	0.5833	None	-0.02287	0.08543	0.2987	0.9227	None	-0.641	0.3504	0.002285	0.03823	Down
Atp5c1	Medulla	1	1919	-0.1388	0.03965	0.0001051	0.005969	Down	0.1001	0.03863	0.003845	0.0974	None	0.257	0.03876	5.996e-12	5.05e-10	Up
Atp5d	Medulla	1	2282	-0.08684	0.03571	0.006684	0.1729	None	0.1365	0.03637	4.632e-05	0.002518	Up	0.2387	0.03571	4.615e-12	3.985e-10	Up
Atp5e	Medulla	1	4336	-0.2473	0.02884	1.131e-18	5.07e-16	Down	-0.3313	0.02935	1.404e-30	1.225e-27	Down	-0.07918	0.02865	0.004289	0.06321	None
Atp5f1	Medulla	1	2949	-0.1253	0.03342	4.841e-05	0.003064	Down	0.07072	0.03237	0.01786	0.2907	None	0.2077	0.03291	7.02e-11	5.413e-09	Up
Atp5g1	Medulla	1	3084	-0.11	0.03334	0.0003198	0.01555	Down	0.09235	0.03293	0.002347	0.06594	None	0.2152	0.03298	1.611e-11	1.303e-09	Up
Atp5g2	Medulla	1	1218	0.005275	0.0426	0.871	0.9982	None	0.1931	0.05176	2.712e-05	0.001561	Up	0.1897	0.0495	3.454e-05	0.001083	Up
Atp5g3	Medulla	1	2926	-0.08427	0.03341	0.005488	0.1489	None	0.02638	0.03193	0.3713	0.9533	None	0.1185	0.0333	0.0002051	0.005128	Up
Atp5h	Medulla	1	3975	-0.201	0.03052	5.919e-12	1.115e-09	Down	0.1304	0.03005	4.183e-06	0.0002951	Up	0.3419	0.02987	2.916e-31	8.792e-29	Up
Atp5j	Medulla	1	4330	-0.1567	0.02805	4.581e-09	5.98e-07	Down	0.04977	0.02697	0.05074	0.5203	None	0.2132	0.0276	2.679e-15	2.941e-13	Up
Atp5j2	Medulla	1	5094	-0.2112	0.02896	3.703e-14	8.897e-12	Down	-0.1739	0.0292	4.669e-10	7.373e-08	Down	0.03432	0.02813	0.2024	0.6763	None
Atp5k	Medulla	1	2771	-0.2614	0.03364	7.497e-16	2.143e-13	Down	-0.4855	0.03462	6.856e-46	1.421e-42	Down	-0.2148	0.0345	1.144e-10	8.621e-09	Down
Atp5l	Medulla	1	4155	-0.2146	0.02822	3.627e-15	9.395e-13	Down	-0.09809	0.02801	0.0002073	0.008973	None	0.1113	0.0278	3.597e-05	0.001119	Up
Atp5md	Medulla	1	5483	-0.155	0.02813	7.103e-09	8.922e-07	Down	-0.4177	0.02878	7.238e-49	2e-45	Down	-0.2552	0.02856	7.466e-20	1.226e-17	Down
Atp5mpl	Medulla	1	4033	-0.1828	0.03188	1.51e-09	2.202e-07	Down	-0.3088	0.03242	1.451e-22	8.022e-20	Down	-0.1182	0.03172	0.0001069	0.002911	Down
Atp5o	Medulla	1	2777	-0.2102	0.03429	1.087e-10	1.784e-08	Down	0.1524	0.03372	1.385e-06	0.0001125	Up	0.3755	0.03336	2.346e-30	6.946e-28	Up
Atp6v0a1	Medulla	1	725.9	0.1773	0.06585	0.00092	0.03757	Up	0.1188	0.06444	0.0176	0.2879	None	-0.04409	0.05592	0.3605	0.8166	None
Atp6v0b	Medulla	1	1613	-0.04627	0.04151	0.1926	0.9213	None	0.1392	0.0459	0.0005846	0.02154	Up	0.204	0.04484	1.34e-06	5.698e-05	Up
Atp6v0c	Medulla	1	5367	-0.001133	0.02587	0.7586	0.9982	None	0.1348	0.02759	2.277e-07	2.345e-05	Up	0.1296	0.02686	6.842e-07	3.108e-05	Up
Atp6v0e2	Medulla	1	1009	0.05109	0.04777	0.1875	0.9151	None	0.198	0.05501	4.304e-05	0.002355	Up	0.1335	0.05116	0.004056	0.0603	None
Atp6v1f	Medulla	1	1696	-0.07486	0.04146	0.03594	0.5114	None	0.2037	0.04343	3.77e-07	3.572e-05	Up	0.2984	0.04228	2.368e-13	2.282e-11	Up
Atp6v1g1	Medulla	1	931.4	-0.02789	0.04653	0.4622	0.9982	None	0.2191	0.05638	1.194e-05	0.0007587	Up	0.2649	0.0542	1.542e-07	8.064e-06	Up
Atp6v1g2	Medulla	1	1340	0.05267	0.04219	0.142	0.8616	None	0.1753	0.04686	3.08e-05	0.001737	Up	0.1138	0.04373	0.005078	0.07105	None
Atxn2l	Medulla	1	195.1	0.3074	0.1241	0.0007444	0.0314	Up	-0.1325	0.1274	0.03518	0.4293	None	-0.5933	0.1178	3e-08	1.715e-06	Down
Aurkaip1	Medulla	1	656.3	-0.2141	0.07386	0.0003605	0.01728	Down	0.08607	0.06495	0.07356	0.6191	None	0.3533	0.07038	5.74e-08	3.151e-06	Up
B230118H07Rik	Medulla	1	288	-0.0953	0.08993	0.06469	0.669	None	0.1124	0.09254	0.04838	0.5032	None	0.3206	0.09671	9.652e-05	0.00265	Up
B230312C02Rik	Medulla	1	126.3	-0.1534	0.1949	0.02099	0.3727	None	0.08113	0.1105	0.09077	0.6627	None	0.5224	0.1564	4.889e-05	0.001463	Up
B3gat3	Medulla	1	668	-0.04504	0.05487	0.2721	0.9714	None	0.2116	0.06757	0.0001935	0.008466	Up	0.2936	0.06477	7.723e-07	3.47e-05	Up
BC029722	Medulla	1	475.2	0.07517	0.06949	0.1064	0.7909	None	0.23	0.08254	0.0004932	0.01884	Up	0.1154	0.07169	0.05089	0.3468	None
Baalc	Medulla	1	419.2	-0.2562	0.0874	0.0002522	0.01278	Down	0.05364	0.06579	0.2484	0.8943	None	0.3643	0.0829	1.077e-06	4.673e-05	Up
Bag1	Medulla	1	603.7	-0.107	0.0668	0.02768	0.4379	None	0.2367	0.06869	5.647e-05	0.003011	Up	0.3964	0.0661	1.891e-10	1.413e-08	Up
Baiap3	Medulla	1	75.44	0.6897	0.2063	3.546e-05	0.002333	Up	0.03502	0.08648	0.2737	0.9101	None	-0.4347	0.2101	0.001997	0.03417	Down
Banf1	Medulla	0	305.8	-0.0861	0.08624	0.08103	0.7334	None	0.06571	0.07703	0.1716	0.8247	None	0.2486	0.09732	0.001544	0.02783	Up
Banp	Medulla	1	82.26	0.5681	0.1948	0.0001439	0.007954	Up	0.07823	0.1209	0.06634	0.592	None	-0.1672	0.1675	0.04672	0.3306	None
Bbip1	Medulla	0	305.7	-0.06273	0.07822	0.162	0.8913	None	0.08713	0.0879	0.09437	0.6719	None	0.2534	0.1019	0.001768	0.03092	Up
Bc1	Medulla	1	283	-0.6545	0.1042	1.736e-11	3.234e-09	Down	0.3074	0.1006	0.0001508	0.00683	Up	1.025	0.09915	2.814e-26	6.481e-24	Up
Bcas1	Medulla	1	1003	-0.1682	0.05597	0.0003943	0.01873	Down	0.009216	0.04579	0.8542	0.9926	None	0.185	0.05408	0.000168	0.004338	Up
Bcl2l1	Medulla	1	347.2	0.2633	0.1012	0.0005845	0.02581	Up	0.4135	0.09798	1.35e-06	0.0001114	Up	0.09307	0.08024	0.1355	0.5779	None
Bcl7c	Medulla	1	144.1	-0.1257	0.1497	0.03233	0.4799	None	0.1332	0.1415	0.03485	0.4264	None	0.5117	0.1393	1.499e-05	0.0005144	Up
Bend6	Medulla	1	1309	-0.07277	0.04663	0.05921	0.6395	None	0.1459	0.04961	0.0007157	0.02541	Up	0.2454	0.04853	7.822e-08	4.238e-06	Up
Bex2	Medulla	1	1853	0.1919	0.04274	9.751e-07	8.835e-05	Up	0.2919	0.04284	8.667e-13	1.942e-10	Up	0.08873	0.0396	0.01713	0.172	None
Bex3	Medulla	1	1380	0.03471	0.04243	0.3326	0.9851	None	0.3122	0.04848	1.009e-11	2.074e-09	Up	0.2669	0.04677	1.87e-09	1.276e-07	Up
Bicd2	Medulla	0	156.8	0.109	0.1255	0.04652	0.5833	None	-0.04921	0.08429	0.2448	0.8938	None	-0.3314	0.1381	0.001383	0.0254	Down
Bin1	Medulla	1	990.6	-0.1857	0.05418	8.001e-05	0.004688	Down	0.005743	0.04465	0.8757	0.9926	None	0.2	0.05247	3.447e-05	0.001082	Up
Bmyc	Medulla	1	448.3	-0.01648	0.05646	0.6853	0.9982	None	0.2556	0.08173	0.0001512	0.00683	Up	0.2946	0.07756	1.604e-05	0.0005428	Up
Bnip3	Medulla	1	629.6	-0.01978	0.05167	0.6134	0.9982	None	0.141	0.06772	0.007444	0.1584	None	0.1862	0.065	0.001098	0.0213	Up
Bnip3l	Medulla	0	627	-0.1259	0.06803	0.01333	0.2791	None	0.01885	0.05304	0.6488	0.9815	None	0.1697	0.06594	0.003021	0.04812	Up
Bod1	Medulla	1	389.9	-0.2442	0.09164	0.0005837	0.02581	Down	0.1647	0.08788	0.008206	0.1705	None	0.4882	0.08475	6.299e-10	4.541e-08	Up
Bola2	Medulla	1	859.3	-0.144	0.05812	0.002408	0.08083	None	-0.2915	0.05987	9.326e-08	1.059e-05	Down	-0.1212	0.05637	0.01554	0.1613	None
Bola3	Medulla	1	694.4	-0.2729	0.06444	1.857e-06	0.0001595	Down	0.003238	0.04984	0.9446	0.9926	None	0.2817	0.06281	1.04e-06	4.549e-05	Up
Brcc3	Medulla	1	150.2	-0.3268	0.1529	0.001496	0.05575	None	0.02277	0.07335	0.5634	0.9726	None	0.4296	0.14	0.0001466	0.003846	Up
Bri3	Medulla	1	485.6	-0.5023	0.08016	2.085e-11	3.799e-09	Down	0.03349	0.05924	0.4142	0.9583	None	0.5684	0.07858	3.287e-14	3.334e-12	Up
Brk1	Medulla	1	781	-0.03235	0.05061	0.4083	0.9964	None	0.2032	0.06318	0.0001382	0.006346	Up	0.2645	0.06063	2.02e-06	8.352e-05	Up
Bsg	Medulla	1	2443	-0.1365	0.03641	4.18e-05	0.002707	Down	-0.0009631	0.0333	0.9695	0.994	None	0.1392	0.03563	4.29e-05	0.001312	Up
Btf3	Medulla	1	1124	-0.00104	0.04331	0.9842	0.9999	None	0.1574	0.05297	0.0005646	0.021	Up	0.165	0.05058	0.0003723	0.008562	Up
C1d	Medulla	1	450.7	-0.01582	0.05659	0.6912	0.9982	None	0.1903	0.08314	0.002566	0.07032	None	0.2355	0.07835	0.0004574	0.01023	Up
C1qbp	Medulla	0	437.3	-0.08448	0.07241	0.0787	0.7277	None	0.0707	0.06827	0.1389	0.7701	None	0.2194	0.07824	0.0009707	0.01934	Up
C1ql1	Medulla	1	341.4	-0.03927	0.08328	0.2243	0.949	None	-1.046	0.186	8.564e-10	1.327e-07	Down	-0.8186	0.1885	6.959e-07	3.152e-05	Down
C1ql2	Medulla	0	73.65	-0.02622	0.08369	0.08872	0.7522	None	0.02693	0.08853	0.1321	0.7593	None	0.9617	0.4834	0.001306	0.02438	Up
Cabp1	Medulla	1	479.7	-0.3223	0.07922	3.145e-06	0.0002531	Down	-0.3348	0.08056	2.255e-06	0.0001699	Down	-0.008549	0.06525	0.875	0.9826	None
Cacna1a	Medulla	1	169.9	0.006613	0.06629	0.8525	0.9982	None	-0.3376	0.1441	0.0009707	0.03232	Down	-0.3782	0.1338	0.0003619	0.008366	Down
Cacna1b	Medulla	1	95.94	0.1075	0.1579	0.03313	0.4869	None	-0.04869	0.09177	0.1893	0.8422	None	-0.4776	0.1824	0.0004948	0.01095	Down
Cacna1e	Medulla	1	71.87	0.3969	0.2413	0.003092	0.09879	None	-0.02931	0.08417	0.3428	0.9437	None	-0.6586	0.2093	8.104e-05	0.002289	Down
Cacna1g	Medulla	1	151.6	0.3701	0.1488	0.0005954	0.02618	Up	-0.04645	0.08469	0.2548	0.8983	None	-0.5613	0.1404	3.842e-06	0.0001492	Down
Cacna2d1	Medulla	1	117.9	0.1745	0.2142	0.01712	0.327	None	-0.04623	0.08866	0.2269	0.8779	None	-0.4786	0.1701	0.0002824	0.006766	Down
Cacna2d2	Medulla	1	139.1	0.08829	0.1153	0.06504	0.6707	None	-0.08264	0.1119	0.08661	0.6486	None	-0.4251	0.1508	0.0003101	0.007242	Down
Cacnb3	Medulla	0	128.4	0.0289	0.07514	0.3987	0.9952	None	-0.1756	0.205	0.01901	0.3011	None	-0.396	0.1681	0.00119	0.02269	Down
Cacng7	Medulla	1	107.8	0.3751	0.1765	0.001404	0.05325	None	-0.04407	0.08731	0.2442	0.8937	None	-0.6068	0.1626	1.067e-05	0.0003774	Down
Cacybp	Medulla	1	770.9	-0.06051	0.05619	0.1516	0.8722	None	0.1906	0.06516	0.0004624	0.01783	Up	0.292	0.06278	4.669e-07	2.199e-05	Up
Calb1	Medulla	1	361.4	0.05731	0.09994	0.08491	0.7416	None	-0.4129	0.2507	0.003037	0.08044	None	-0.8381	0.2081	2.646e-06	0.0001065	Down
Calca	Medulla	1	73.02	0.9022	0.3152	0.0001475	0.008095	Up	-1.777	0.3533	2.446e-08	3.073e-06	Down	-2.91	0.3343	2.063e-19	3.197e-17	Down
Calcb	Medulla	1	10.04	0.02595	0.08415	0.04175	0.5516	None	-0.01732	0.08596	0.1378	0.7678	None	-1.557	0.6476	0.0006413	0.01355	Down
Calm2	Medulla	1	4691	-0.03942	0.02774	0.1275	0.8364	None	0.06707	0.02849	0.01209	0.2225	None	0.1128	0.02847	4.269e-05	0.001308	Up
Calm3	Medulla	1	2745	-0.05398	0.03362	0.07541	0.7148	None	0.217	0.03546	1.262e-10	2.226e-08	Up	0.2822	0.0346	5.474e-17	6.824e-15	Up
Calml4	Medulla	1	39.79	-0.04267	0.0916	0.08177	0.7334	None	-0.8079	0.3187	0.0003878	0.01543	Down	-0.1097	0.1751	0.05594	0.3662	None
Camk2a	Medulla	1	52.14	0.0637	0.1096	0.05102	0.6054	None	-0.06719	0.1171	0.04595	0.49	None	-0.7732	0.244	7.075e-05	0.002033	Down
Camk2b	Medulla	1	547	0.2097	0.07442	0.0004649	0.02147	Up	0.0254	0.0567	0.5503	0.9726	None	-0.175	0.06983	0.003435	0.05337	None
Camk2n2	Medulla	1	1149	-0.2794	0.05503	3.162e-08	3.591e-06	Down	-0.1009	0.05286	0.02047	0.3157	None	0.1553	0.05358	0.001358	0.02509	Up
Caprin2	Medulla	0	25.81	0.01377	0.07794	0.4725	0.9982	None	-0.05869	0.1136	0.01367	0.2391	None	-0.8207	0.398	0.001323	0.02468	Down
Car12	Medulla	1	23.89	-0.01462	0.07858	0.4064	0.9964	None	-0.9876	0.4436	0.0008084	0.02792	Down	-0.1604	0.3313	0.008908	0.1063	None
Car2	Medulla	1	2496	-0.1875	0.03689	5.352e-08	5.877e-06	Down	0.1265	0.03616	0.0001399	0.006407	Up	0.3292	0.03595	6.656e-21	1.126e-18	Up
Car8	Medulla	1	205.7	0.8241	0.1217	6.733e-13	1.395e-10	Up	0.08371	0.1029	0.09613	0.6769	None	-0.6068	0.1187	1.994e-08	1.177e-06	Down
Carmil2	Medulla	1	257.2	-0.06321	0.08019	0.1587	0.8858	None	0.3844	0.106	1.701e-05	0.001048	Up	0.5457	0.1012	4.732e-09	3.006e-07	Up
Carmil3	Medulla	0	96.52	0.04914	0.08782	0.1704	0.8975	None	-0.08142	0.1207	0.0691	0.6036	None	-0.4231	0.1827	0.001211	0.02297	Down
Cavin3	Medulla	1	221.8	-0.0856	0.09925	0.08147	0.7334	None	0.1925	0.1274	0.01045	0.2003	None	0.4396	0.1162	1.147e-05	0.000402	Up
Cbln1	Medulla	1	250	0.005342	0.0633	0.8589	0.9982	None	-0.4852	0.1181	2.118e-06	0.0001611	Down	-0.5081	0.1141	5.153e-07	2.38e-05	Down
Cbln3	Medulla	1	64.52	-0.04535	0.09032	0.1302	0.8391	None	-0.6005	0.2487	0.0005611	0.02095	Down	-0.1609	0.2088	0.04296	0.3126	None
Ccdc124	Medulla	1	537.4	-0.02377	0.05534	0.5526	0.9982	None	0.2665	0.07577	3.72e-05	0.002063	Up	0.3184	0.0724	1.277e-06	5.444e-05	Up
Ccdc28a	Medulla	1	267.4	-0.088	0.09134	0.0794	0.7281	None	0.1266	0.102	0.03534	0.4295	None	0.3433	0.103	8.291e-05	0.00233	Up
Ccdc85b	Medulla	1	710.6	-0.2624	0.06665	6.817e-06	0.000523	Down	0.2154	0.06483	0.0001009	0.004866	Up	0.5188	0.06312	1.518e-17	1.997e-15	Up
Ccdc92	Medulla	0	655.5	-0.05363	0.05574	0.1991	0.9233	None	0.08228	0.06044	0.07203	0.615	None	0.1753	0.06338	0.001647	0.02926	Up
Cck	Medulla	1	344.7	0.03386	0.06494	0.4036	0.9954	None	0.5026	0.09451	6.014e-09	8.31e-07	Up	0.4244	0.09098	2.531e-07	1.249e-05	Up
Ccn3	Medulla	1	8.744	-0.01534	0.08037	0.1117	0.8014	None	0.02559	0.08892	0.05455	0.538	None	1.684	0.689	0.0005709	0.01237	Up
Ccnl1	Medulla	0	85.67	0.05267	0.09254	0.1318	0.8432	None	-0.05865	0.1009	0.121	0.7349	None	-0.4199	0.2008	0.001944	0.03343	Down
Cct6a	Medulla	1	631.9	-0.05945	0.0581	0.1612	0.8897	None	0.09268	0.06342	0.05257	0.5276	None	0.1969	0.06571	0.0006556	0.01378	Up
Cd24a	Medulla	1	151.8	-1.142	0.1489	8.793e-16	2.471e-13	Down	-0.2445	0.1681	0.007353	0.1573	None	0.7512	0.1544	6.133e-08	3.356e-06	Up
Cd63	Medulla	1	532.1	-0.1965	0.0757	0.0009834	0.03938	Down	0.06361	0.062	0.1641	0.8147	None	0.3106	0.07195	1.971e-06	8.17e-05	Up
Cd81	Medulla	1	3031	-0.06891	0.03202	0.01831	0.3411	None	0.04793	0.0316	0.1007	0.69	None	0.1259	0.03229	4.951e-05	0.001479	Up
Cdc42ep1	Medulla	1	157.1	-0.4411	0.1427	9.257e-05	0.005311	Down	-0.09188	0.1113	0.07753	0.6296	None	0.1793	0.1357	0.03291	0.2643	None
Cdk2ap1	Medulla	1	317.8	-0.1979	0.1014	0.004328	0.1261	None	0.03565	0.06616	0.414	0.9581	None	0.2959	0.0943	0.0001996	0.005021	Up
Cdk2ap2	Medulla	1	196.6	0.0166	0.0678	0.6486	0.9982	None	0.3627	0.1321	0.0003209	0.01323	Up	0.3119	0.1245	0.001166	0.0223	Up
Cdk5	Medulla	1	572.9	-0.03118	0.05519	0.4368	0.9977	None	0.1634	0.07309	0.003822	0.09704	None	0.2317	0.06998	0.0001703	0.004385	Up
Cdk5rap1	Medulla	1	38.05	0.7487	0.3238	0.0006992	0.02965	Up	0.6765	0.3434	0.001481	0.04514	Up	-0.008233	0.1081	0.8572	0.9794	None
Cdkn1a	Medulla	1	110.1	0.8825	0.1645	4.108e-09	5.405e-07	Up	0.7128	0.1717	1.588e-06	0.0001266	Up	-0.06866	0.1044	0.2848	0.7555	None
Cdkn2aipnl	Medulla	1	238.1	-0.08759	0.09537	0.07944	0.7281	None	0.129	0.1088	0.03564	0.4312	None	0.361	0.1093	8.42e-05	0.002358	Up
Cdr1os	Medulla	1	440.9	-1.598	0.08421	1.386e-81	1.149e-77	Down	-0.7192	0.07865	3.263e-21	1.503e-18	Down	0.8543	0.08836	2.432e-23	4.978e-21	Up
Cds2	Medulla	1	659.3	0.1616	0.06681	0.002233	0.07619	None	-0.05823	0.05834	0.1889	0.842	None	-0.2619	0.06527	9.386e-06	0.0003376	Down
Cela1	Medulla	1	47.35	-0.8944	0.2866	6.79e-05	0.004045	Down	-0.008571	0.08013	0.7397	0.9815	None	0.8013	0.2902	0.0002347	0.005765	Up
Cend1	Medulla	1	1653	-0.05343	0.04132	0.1302	0.8391	None	0.1587	0.04509	8.541e-05	0.004317	Up	0.2315	0.04393	2.864e-08	1.643e-06	Up
Cenpv	Medulla	1	80.77	-0.4846	0.2014	0.0006016	0.02632	Down	-0.5693	0.2009	0.0001847	0.008121	Down	-0.02178	0.1023	0.6906	0.9466	None
Cfl1	Medulla	1	3413	-0.02957	0.03045	0.2851	0.973	None	0.1348	0.03267	1.021e-05	0.000661	Up	0.1723	0.03193	2.323e-08	1.356e-06	Up
Cfl2	Medulla	1	731.1	-0.09568	0.06239	0.03917	0.5348	None	0.1486	0.06523	0.004288	0.1069	None	0.294	0.06376	5.382e-07	2.472e-05	Up
Chchd1	Medulla	1	576.7	-0.05006	0.05812	0.2311	0.949	None	0.1748	0.07184	0.002145	0.06122	None	0.2708	0.06891	1.256e-05	0.0004365	Up
Chchd10	Medulla	1	3707	-0.37	0.03032	2.161e-35	7.165e-32	Down	0.06637	0.02894	0.01445	0.2505	None	0.4436	0.02989	7.022e-51	6.127e-48	Up
Chchd2	Medulla	1	4646	-0.1856	0.03044	1.623e-10	2.638e-08	Down	0.1959	0.03009	1.176e-11	2.349e-09	Up	0.3915	0.02973	1.351e-40	7.001e-38	Up
Chchd7	Medulla	1	355.7	-0.16	0.09345	0.01011	0.2338	None	0.07374	0.07417	0.1344	0.7644	None	0.316	0.08771	3.52e-05	0.001101	Up
Chd4	Medulla	1	257.5	-0.02696	0.06509	0.4962	0.9982	None	-0.2867	0.1136	0.0007503	0.02636	Down	-0.225	0.1061	0.005548	0.07583	None
Chga	Medulla	1	1036	-0.1259	0.05203	0.003654	0.1118	None	-0.1624	0.05361	0.0004407	0.01707	Down	-0.0296	0.04785	0.4989	0.8878	None
Chgb	Medulla	1	746.2	0.07069	0.05532	0.09349	0.7613	None	-0.155	0.06426	0.002818	0.07596	None	-0.2679	0.06147	2.031e-06	8.375e-05	Down
Chmp2b	Medulla	1	271.4	-0.1549	0.1136	0.01682	0.3236	None	0.03946	0.07086	0.3683	0.9518	None	0.2836	0.1057	0.0008516	0.01737	Up
Chmp4b	Medulla	1	524.8	-0.1343	0.07211	0.01114	0.2503	None	-0.3013	0.07503	4.557e-06	0.0003174	Down	-0.1249	0.06915	0.03134	0.2565	None
Chodl	Medulla	1	16.23	1.518	0.5357	0.0001982	0.0104	Up	1.066	0.6352	0.002548	0.06996	None	-0.02546	0.118	0.4412	0.8623	None
Chuk	Medulla	1	89.26	0.06204	0.1004	0.09632	0.7678	None	-0.0933	0.1406	0.04517	0.4862	None	-0.5489	0.1905	0.0002069	0.005167	Down
Churc1	Medulla	1	313.3	-0.06601	0.07682	0.1494	0.8704	None	0.1024	0.08895	0.06128	0.5686	None	0.2658	0.09559	0.0007247	0.015	Up
Ciao2b	Medulla	1	291.9	0.04914	0.0706	0.2511	0.9591	None	0.3238	0.1011	8.874e-05	0.004458	Up	0.2156	0.09371	0.003886	0.05821	None
Cib2	Medulla	1	344.6	-0.000751	0.05992	0.9849	0.9999	None	0.271	0.09807	0.0004064	0.016	Up	0.2844	0.09226	0.0002552	0.006186	Up
Cisd1	Medulla	1	1185	-0.07221	0.05138	0.08729	0.7468	None	0.1937	0.05595	7.375e-05	0.003797	Up	0.2951	0.05431	7.662e-09	4.723e-07	Up
Ckb	Medulla	1	10270	-0.1854	0.02394	3.563e-15	9.376e-13	Down	-0.07514	0.02362	0.0007097	0.02536	None	0.1034	0.02363	7.679e-06	0.0002811	Up
Clasrp	Medulla	1	120.9	0.02898	0.075	0.4018	0.9952	None	-0.1999	0.2087	0.01499	0.257	None	-0.4098	0.1663	0.0008742	0.0177	Down
Clcn2	Medulla	1	126	0.01479	0.06972	0.6654	0.9982	None	-0.2926	0.1769	0.004344	0.1081	None	-0.3916	0.1548	0.0007868	0.01617	Down
Cldn10	Medulla	1	389	-0.1026	0.08754	0.05164	0.6076	None	0.06771	0.0746	0.1617	0.812	None	0.2576	0.09147	0.0006837	0.01428	Up
Cldn11	Medulla	1	1494	-0.04805	0.04117	0.1721	0.8988	None	-0.1394	0.04637	0.0006186	0.02259	Down	-0.08772	0.04368	0.03332	0.266	None
Cldn2	Medulla	1	15.62	-0.02614	0.08355	0.09723	0.7705	None	-1.215	0.5179	0.0006447	0.02334	Down	-0.06429	0.1404	0.0559	0.3662	None
Clic6	Medulla	1	89.38	-0.4295	0.2152	0.001573	0.05784	None	-0.8866	0.2002	4.353e-07	4.077e-05	Down	-0.171	0.1958	0.0425	0.3101	None
Clip3	Medulla	0	1326	0.08208	0.04419	0.02928	0.4558	None	-0.02785	0.04169	0.4549	0.9623	None	-0.1228	0.04465	0.003007	0.04808	Down
Clk1	Medulla	0	341.8	0.01876	0.05997	0.6377	0.9982	None	-0.1545	0.097	0.01504	0.2574	None	-0.2177	0.09117	0.003005	0.04808	Down
Clta	Medulla	1	1362	-0.05676	0.04544	0.134	0.8478	None	0.1928	0.05025	1.913e-05	0.001149	Up	0.2719	0.04877	3.889e-09	2.5e-07	Up
Cltb	Medulla	1	1116	-0.04224	0.04567	0.2615	0.9647	None	0.1502	0.05249	0.0008609	0.02937	Up	0.2154	0.05094	5.248e-06	0.0001991	Up
Cmas	Medulla	1	566.4	-0.05074	0.05871	0.2264	0.949	None	0.1239	0.07049	0.01849	0.2965	None	0.2233	0.06974	0.0002682	0.006473	Up
Cmc2	Medulla	0	175.8	-0.1462	0.1476	0.02436	0.405	None	0.03789	0.07704	0.3628	0.9504	None	0.325	0.1342	0.001349	0.02506	Up
Cmtm5	Medulla	1	614.9	-0.01184	0.05234	0.7635	0.9982	None	0.2686	0.07121	1.406e-05	0.0008895	Up	0.2958	0.06814	1.837e-06	7.67e-05	Up
Cnpy1	Medulla	1	31.37	0.06828	0.1227	0.01476	0.2998	None	-0.03689	0.09266	0.1077	0.7089	None	-1.023	0.3156	5.321e-05	0.00157	Down
Cntnap2	Medulla	0	311.9	0.08406	0.08411	0.08859	0.7517	None	-0.06783	0.07942	0.1617	0.812	None	-0.248	0.09795	0.001635	0.02911	Down
Coa3	Medulla	1	842.5	-0.03609	0.05057	0.3669	0.994	None	0.137	0.06143	0.005709	0.1318	None	0.2014	0.05975	0.00018	0.004605	Up
Col1a1	Medulla	0	30.48	-0.04896	0.09935	0.02412	0.4032	None	0.01998	0.08414	0.372	0.9533	None	0.7377	0.3689	0.00151	0.02727	Up
Col1a2	Medulla	1	86.77	-0.06828	0.1101	0.0633	0.6648	None	0.06359	0.1039	0.1102	0.7137	None	0.5147	0.1964	0.0004502	0.01011	Up
Col5a2	Medulla	1	17.2	-0.03476	0.08901	0.02226	0.3865	None	0.01828	0.08506	0.3022	0.9239	None	1.088	0.4929	0.000904	0.01819	Up
Commd1	Medulla	1	320.7	-0.116	0.0955	0.03774	0.5251	None	0.084	0.08243	0.1015	0.6932	None	0.3055	0.09566	0.0001573	0.004082	Up
Commd6	Medulla	1	308.2	-0.09974	0.09047	0.05753	0.6351	None	0.09111	0.08501	0.08313	0.6435	None	0.2977	0.09569	0.0002158	0.005345	Up
Coprs	Medulla	1	425.3	-0.1488	0.08472	0.01101	0.2488	None	0.09442	0.07467	0.06708	0.5955	None	0.3186	0.08052	8.603e-06	0.0003108	Up
Cops6	Medulla	1	702.1	-0.1478	0.06646	0.004276	0.1248	None	0.1335	0.0644	0.00845	0.1732	None	0.332	0.06382	2.302e-08	1.349e-06	Up
Cops9	Medulla	1	2509	-0.1373	0.03435	1.5e-05	0.001067	Down	-0.1929	0.03518	6.465e-09	8.753e-07	Down	-0.0506	0.03333	0.1129	0.5353	None
Cox14	Medulla	1	1367	-0.09586	0.04529	0.01256	0.2701	None	0.1371	0.04613	0.0007275	0.02572	Up	0.2582	0.04531	2.087e-09	1.413e-07	Up
Cox16	Medulla	1	398.5	-0.05238	0.06619	0.2301	0.949	None	0.1357	0.08504	0.01985	0.31	None	0.257	0.08341	0.0003079	0.007242	Up
Cox17	Medulla	1	1333	-0.1658	0.04729	7.449e-05	0.004411	Down	-0.2891	0.04838	2.036e-10	3.517e-08	Down	-0.1072	0.04604	0.0115	0.1291	None
Cox4i1	Medulla	1	9894	-0.1016	0.02365	6.648e-06	0.0005126	Down	0.2284	0.02369	7.576e-23	4.332e-20	Up	0.336	0.0234	1.104e-47	8.316e-45	Up
Cox5a	Medulla	1	3747	-0.1197	0.03085	3.099e-05	0.002063	Down	0.247	0.03066	8.907e-17	2.966e-14	Up	0.3773	0.03011	5.59e-37	2.155e-34	Up
Cox5b	Medulla	1	5896	-0.06982	0.02505	0.003195	0.1013	None	0.06918	0.02512	0.003801	0.09665	None	0.1451	0.02511	3.194e-09	2.077e-07	Up
Cox6a1	Medulla	1	5240	-0.06892	0.02616	0.005068	0.1419	None	0.2182	0.02666	3.58e-17	1.237e-14	Up	0.2943	0.02614	2.926e-30	8.51e-28	Up
Cox6b1	Medulla	1	4193	-0.1202	0.03146	3.917e-05	0.002547	Down	0.02409	0.02968	0.3815	0.9533	None	0.1508	0.03106	4.921e-07	2.292e-05	Up
Cox6c	Medulla	1	8951	-0.1903	0.02279	1.032e-17	3.981e-15	Down	-0.1954	0.02303	3.533e-18	1.302e-15	Down	-0.00489	0.02239	0.828	0.9757	None
Cox7a2	Medulla	1	5210	-0.2261	0.02663	3.207e-18	1.329e-15	Down	-0.08248	0.02625	0.0009295	0.03129	None	0.1381	0.02634	7.277e-08	3.956e-06	Up
Cox7a2l	Medulla	1	1414	-0.1063	0.04599	0.006556	0.1704	None	0.2453	0.04636	1.319e-08	1.764e-06	Up	0.3756	0.04517	9.552e-18	1.288e-15	Up
Cox7b	Medulla	1	4717	-0.2028	0.02663	3.344e-15	8.944e-13	Down	-0.09758	0.02648	0.0001004	0.004861	None	0.101	0.02622	7.533e-05	0.00215	Up
Cox7c	Medulla	1	6661	-0.1395	0.02358	7.911e-10	1.171e-07	Down	-0.2394	0.02407	3.132e-24	2.258e-21	Down	-0.09581	0.02353	3.046e-05	0.0009675	None
Cox8a	Medulla	1	8149	-0.1074	0.02286	9.668e-07	8.808e-05	Down	-0.1124	0.02312	4.393e-07	4.092e-05	Down	-0.004685	0.02249	0.8325	0.9767	None
Cox8b	Medulla	1	17.09	-0.9991	0.4723	0.0009954	0.03967	Down	-0.05431	0.1096	0.009246	0.1847	None	0.0207	0.1174	0.508	0.8903	None
Cpe	Medulla	1	3907	0.09239	0.02928	0.0006965	0.02961	None	-0.07482	0.02968	0.006922	0.1516	None	-0.1766	0.02947	6.759e-10	4.851e-08	Down
Cplx2	Medulla	1	324	0.2782	0.1	0.0003484	0.01675	Up	-0.06409	0.07791	0.1784	0.8317	None	-0.4286	0.09602	6.383e-07	2.915e-05	Down
Creb5	Medulla	1	26.75	-1.251	0.3402	9.954e-06	0.0007271	Down	-0.7885	0.3694	0.0009939	0.03289	Down	0.04364	0.123	0.2659	0.7403	None
Creld2	Medulla	1	80.71	0.06377	0.1054	0.07354	0.7049	None	0.5032	0.2131	0.0007018	0.02513	Up	0.1237	0.147	0.08988	0.479	None
Crh	Medulla	1	193.7	0.08303	0.1345	0.03442	0.4971	None	-0.8327	0.2206	6.659e-06	0.0004488	Down	-1.286	0.2088	3.509e-11	2.784e-09	Down
Cript	Medulla	1	479.7	-0.004659	0.05456	0.8653	0.9982	None	0.1638	0.07884	0.00552	0.1294	None	0.1903	0.07407	0.002456	0.0405	Up
Cryab	Medulla	1	2568	-0.2181	0.03614	1.855e-10	2.986e-08	Down	0.4049	0.03479	1.91e-32	1.863e-29	Up	0.6343	0.03442	5.515e-77	1.829e-73	Up
Csrp1	Medulla	1	1272	-0.3041	0.05413	1.514e-09	2.202e-07	Down	0.07849	0.04969	0.05708	0.5501	None	0.4084	0.05282	1.002e-15	1.131e-13	Up
Cst3	Medulla	1	10870	-0.06233	0.02262	0.003241	0.1023	None	0.1705	0.02306	1.757e-14	4.7e-12	Up	0.2409	0.02277	7.406e-27	1.779e-24	Up
Cstb	Medulla	1	541.3	0.03721	0.05718	0.3672	0.994	None	0.2194	0.07629	0.0004169	0.01633	Up	0.1618	0.07	0.006534	0.08591	None
Ctxn2	Medulla	1	378.9	-0.05281	0.06765	0.2275	0.949	None	0.2608	0.08981	0.0002927	0.01219	Up	0.38	0.08517	7.513e-07	3.385e-05	Up
Cuta	Medulla	1	592	-0.06058	0.06252	0.1671	0.8936	None	0.2858	0.07462	1.006e-05	0.0006579	Up	0.3963	0.07181	3.108e-09	2.029e-07	Up
Cwc15	Medulla	1	501.5	-0.1469	0.07541	0.007901	0.1952	None	0.02615	0.05632	0.5382	0.97	None	0.2067	0.07224	0.0009131	0.01835	Up
Cxcl14	Medulla	1	407.3	-0.1674	0.08824	0.006594	0.1708	None	0.08111	0.07318	0.103	0.6989	None	0.3246	0.08294	9.971e-06	0.0003549	Up
Cyc1	Medulla	1	1554	-0.1671	0.04695	5.913e-05	0.003631	Down	0.01178	0.0405	0.7406	0.9815	None	0.1877	0.04574	1.153e-05	0.0004029	Up
Cycs	Medulla	1	1898	-0.1168	0.03955	0.0009297	0.03778	Down	0.1222	0.03931	0.0005663	0.021	Up	0.2578	0.0389	6e-12	5.05e-10	Up
Cystm1	Medulla	1	864.1	-0.04813	0.05009	0.2246	0.949	None	0.2167	0.05842	2.448e-05	0.001444	Up	0.2927	0.05626	2.583e-08	1.492e-06	Up
D8Ertd738e	Medulla	1	951	-0.06963	0.0511	0.08689	0.7449	None	0.1564	0.05572	0.0009374	0.03146	Up	0.259	0.05417	2.909e-07	1.418e-05	Up
Daam2	Medulla	0	263.4	0.0663	0.08184	0.1437	0.8636	None	-0.08151	0.09137	0.1089	0.7125	None	-0.2668	0.1099	0.001855	0.03224	Down
Dad1	Medulla	1	847.3	0.01718	0.04718	0.6511	0.9982	None	0.177	0.05964	0.0003945	0.0156	Up	0.1605	0.05608	0.001434	0.02619	Up
Dapk3	Medulla	1	57.91	-2.076	0.2273	3.868e-21	2.565e-18	Down	-2.101	0.2359	3.432e-20	1.459e-17	Down	-0.004517	0.109	0.918	0.9851	None
Dazap2	Medulla	1	644.9	-0.2161	0.06748	0.0001359	0.007562	Down	-0.0173	0.05182	0.6655	0.9815	None	0.1946	0.06478	0.0006576	0.0138	Up
Dbndd2	Medulla	1	1926	0.2409	0.04385	3.513e-09	4.659e-07	Up	0.2359	0.04438	1.338e-08	1.775e-06	Up	-0.006073	0.0396	0.8765	0.9826	None
Dbp	Medulla	1	275.4	-0.5868	0.107	2.149e-09	3.019e-07	Down	-0.2347	0.1138	0.002924	0.07844	None	0.255	0.1109	0.002776	0.04481	Up
Dbpht2	Medulla	0	27.82	0.05157	0.1013	0.02839	0.4466	None	-0.01641	0.08369	0.4242	0.9594	None	-0.6535	0.3753	0.002608	0.04248	Down
Dclk1	Medulla	1	489.9	0.07351	0.06652	0.107	0.7912	None	-0.1299	0.0787	0.02021	0.3132	None	-0.2694	0.07659	6.255e-05	0.001816	Down
Dctn3	Medulla	1	1014	-0.01914	0.04429	0.6019	0.9982	None	0.1916	0.05371	5.159e-05	0.002777	Up	0.2248	0.05154	2.7e-06	0.0001084	Up
Dda1	Medulla	1	457	-0.06054	0.06666	0.1752	0.9023	None	0.1526	0.08244	0.01022	0.1971	None	0.2795	0.07974	6.137e-05	0.001789	Up
Ddit3	Medulla	1	203.2	-0.03849	0.07389	0.3298	0.9841	None	0.2521	0.1331	0.003635	0.09372	None	0.4019	0.1212	7.032e-05	0.002024	Up
Ddit4	Medulla	1	224.8	0.1285	0.1125	0.03265	0.4833	None	-0.172	0.1267	0.01587	0.2675	None	-0.4541	0.1124	3.921e-06	0.0001515	Down
Ddt	Medulla	1	770.8	-0.1722	0.06567	0.001128	0.04441	Down	0.05806	0.05547	0.1799	0.8317	None	0.2689	0.06318	3.184e-06	0.0001257	Up
Ddx17	Medulla	1	549	0.04979	0.05912	0.2407	0.9538	None	-0.1553	0.07718	0.00721	0.1563	None	-0.2549	0.07361	8.418e-05	0.002358	Down
Ddx39b	Medulla	1	423.9	-0.0247	0.05797	0.5395	0.9982	None	-0.2785	0.08744	0.0001111	0.005295	Down	-0.2343	0.08321	0.0008262	0.01693	Down
Ddx5	Medulla	1	1667	0.04999	0.03985	0.1451	0.864	None	-0.2137	0.04542	3.282e-07	3.182e-05	Down	-0.2806	0.04384	2.355e-11	1.886e-09	Down
Dennd5a	Medulla	0	942.8	-0.1213	0.05521	0.006743	0.1739	None	0.008738	0.04608	0.8213	0.9888	None	0.1435	0.05362	0.003017	0.04812	Up
Dennd6b	Medulla	1	128.6	-0.006299	0.06895	0.8496	0.9982	None	-0.7236	0.1607	3.184e-07	3.124e-05	Down	-0.6991	0.1571	4.758e-07	2.229e-05	Down
Denr	Medulla	1	481.3	-0.1574	0.08117	0.006876	0.1759	None	0.09687	0.07233	0.05866	0.5563	None	0.3234	0.07701	3.015e-06	0.0001196	Up
Desi1	Medulla	1	683.1	-0.09107	0.06153	0.0467	0.584	None	0.1731	0.06536	0.001226	0.03864	Up	0.3123	0.06321	9.611e-08	5.107e-06	Up
Dexi	Medulla	1	402.9	-0.3846	0.0872	6.085e-07	5.668e-05	Down	-0.1056	0.08096	0.04965	0.5129	None	0.2135	0.08627	0.002543	0.04174	Up
Dgcr6	Medulla	1	376.2	-0.0351	0.06308	0.3941	0.9952	None	0.1403	0.09015	0.01973	0.3085	None	0.2364	0.08747	0.001125	0.02172	Up
Dgkz	Medulla	1	231.4	0.2848	0.1184	0.0009358	0.03793	Up	-0.08804	0.09825	0.09188	0.665	None	-0.5055	0.112	4.35e-07	2.067e-05	Down
Dhcr24	Medulla	1	452.1	0.2255	0.08003	0.0004288	0.0202	Up	-0.07841	0.07121	0.1107	0.7145	None	-0.3671	0.07752	2.146e-07	1.082e-05	Down
Dhx9	Medulla	1	169.6	0.04689	0.07964	0.2363	0.9514	None	-0.3539	0.153	0.0009899	0.03283	Down	-0.54	0.1377	5.448e-06	0.0002062	Down
Dipk1b	Medulla	1	429.2	-0.03991	0.06193	0.3407	0.9868	None	0.1412	0.08388	0.0159	0.2677	None	0.2381	0.08144	0.0005798	0.0125	Up
Dlk1	Medulla	1	201.7	0.5378	0.1399	5.865e-06	0.0004609	Up	0.6665	0.1381	6.943e-08	8.164e-06	Up	0.06037	0.09383	0.3407	0.8021	None
Dmwd	Medulla	0	282.4	0.02338	0.06307	0.5523	0.9982	None	-0.1469	0.1059	0.02152	0.3241	None	-0.2331	0.1001	0.003113	0.04924	Down
Dnaja1	Medulla	1	1317	-0.06458	0.0442	0.08159	0.7334	None	0.07174	0.04482	0.06133	0.5687	None	0.1575	0.04614	0.0002346	0.005765	Up
Dnajb1	Medulla	1	306	0.09316	0.08939	0.06977	0.6915	None	0.4509	0.09899	3.078e-07	3.045e-05	Up	0.27	0.09433	0.0005545	0.01207	Up
Dnajb5	Medulla	1	65.35	0.5353	0.2356	0.0008218	0.03415	Up	0.09389	0.1526	0.03097	0.4014	None	-0.07126	0.1206	0.2336	0.7114	None
Dnajc15	Medulla	1	661.2	-0.2017	0.07097	0.0004702	0.0216	Down	0.03037	0.05442	0.4891	0.964	None	0.2588	0.06811	2.28e-05	0.0007443	Up
Dner	Medulla	1	789.3	0.02608	0.04972	0.5024	0.9982	None	-0.2168	0.06589	0.0001116	0.005302	Down	-0.2651	0.06295	3.737e-06	0.0001458	Down
Dnlz	Medulla	1	417.5	-0.1797	0.09228	0.005221	0.145	None	0.1218	0.08438	0.03178	0.4084	None	0.3884	0.08569	5.221e-07	2.404e-05	Up
Dnm2	Medulla	0	196.9	0.08451	0.09855	0.08628	0.7439	None	-0.0599	0.08588	0.1888	0.842	None	-0.287	0.1233	0.002102	0.03564	Down
Doc2a	Medulla	1	104.6	0.3034	0.2119	0.005267	0.1451	None	0.5702	0.1787	6.172e-05	0.003269	Up	0.08794	0.1159	0.1879	0.6581	None
Dohh	Medulla	1	282.1	-0.03903	0.06904	0.3447	0.9868	None	0.1894	0.1099	0.00809	0.1689	None	0.313	0.1024	0.0002357	0.005772	Up
Dot1l	Medulla	1	90.09	0.002745	0.07111	0.9281	0.9995	None	-0.4154	0.2097	0.001762	0.05199	None	-0.4545	0.1923	0.0009935	0.01969	Down
Dpm3	Medulla	1	404.3	-0.07806	0.07383	0.09865	0.7715	None	-0.2431	0.09083	0.0006246	0.02271	Down	-0.1159	0.07931	0.06513	0.3996	None
Dpy30	Medulla	1	307.4	-0.02855	0.0645	0.4729	0.9982	None	0.2515	0.1029	0.001087	0.03549	Up	0.3389	0.09642	4.358e-05	0.001326	Up
Dpysl4	Medulla	1	125	0.0525	0.08704	0.1672	0.8936	None	-0.4892	0.1732	0.0001987	0.008669	Down	-0.7256	0.1579	2.382e-07	1.189e-05	Down
Dpysl5	Medulla	1	77.8	0.5452	0.2109	0.0003781	0.01806	Up	0.0847	0.1322	0.04807	0.5013	None	-0.1109	0.14	0.1117	0.5319	None
Drap1	Medulla	1	822.3	-0.159	0.06602	0.002373	0.0798	None	0.2907	0.06404	4.705e-07	4.31e-05	Up	0.4929	0.06231	2.003e-16	2.442e-14	Up
Dtnbp1	Medulla	1	397.7	-0.3553	0.09225	7.018e-06	0.0005313	Down	0.06081	0.07047	0.1961	0.8487	None	0.4782	0.08851	4.89e-09	3.083e-07	Up
Dusp11	Medulla	0	147.5	0.09401	0.1165	0.06058	0.6484	None	-0.06007	0.09186	0.1659	0.8162	None	-0.3593	0.1434	0.0009375	0.01875	Down
Dusp26	Medulla	1	420.2	0.1726	0.08758	0.005447	0.1481	None	0.2414	0.08782	0.0005189	0.0196	Up	0.04255	0.0675	0.4479	0.8657	None
Dvl1	Medulla	0	210.5	0.08671	0.09627	0.08267	0.736	None	-0.061	0.08426	0.1849	0.8347	None	-0.2792	0.1165	0.001875	0.03249	Down
Dynll1	Medulla	1	2198	-0.02295	0.03565	0.4686	0.9982	None	0.2933	0.0395	1.024e-14	2.889e-12	Up	0.3237	0.03846	4.895e-18	6.763e-16	Up
Dynll2	Medulla	1	2329	-0.1368	0.03705	5.172e-05	0.00326	Down	-0.04893	0.03503	0.1252	0.744	None	0.08585	0.03581	0.01206	0.134	None
Dynlrb1	Medulla	1	2218	-0.121	0.03816	0.0004317	0.02028	Down	0.186	0.03812	1.593e-07	1.726e-05	Up	0.3245	0.03734	4.633e-19	6.92e-17	Up
Dzip3	Medulla	1	177.3	0.02209	0.06835	0.5488	0.9982	None	-0.242	0.147	0.00583	0.1336	None	-0.3496	0.1303	0.0006095	0.01296	Down
Ecel1	Medulla	1	136.1	0.1873	0.1811	0.01482	0.2999	None	-0.2425	0.1943	0.009137	0.1836	None	-0.6814	0.1509	3.521e-07	1.692e-05	Down
Ecrg4	Medulla	1	217.3	-0.2658	0.1403	0.00298	0.09688	None	-0.8943	0.132	6.319e-13	1.435e-10	Down	-0.5104	0.1362	1.118e-05	0.0003937	Down
Edf1	Medulla	1	1103	-0.03446	0.04539	0.3547	0.9888	None	0.1806	0.05349	0.0001138	0.005378	Up	0.2355	0.05162	9.803e-07	4.334e-05	Up
Edn3	Medulla	1	14.65	0.04176	0.09425	0.01265	0.2707	None	-0.02208	0.08715	0.1287	0.75	None	-1.529	0.4929	8.828e-05	0.00246	Down
Ednrb	Medulla	1	232.4	-0.4857	0.1198	2.527e-06	0.0002084	Down	-0.1034	0.1056	0.06337	0.5795	None	0.2557	0.1219	0.004446	0.06472	None
Eef1a1	Medulla	1	6022	-0.1385	0.0289	3.83e-07	3.67e-05	Down	0.152	0.02876	2.906e-08	3.599e-06	Up	0.3003	0.02847	6.782e-27	1.654e-24	Up
Eef1a2	Medulla	1	809.1	-1.295	0.05842	3.684e-110	6.107e-106	Down	-1.332	0.06017	7.398e-110	1.227e-105	Down	-0.02909	0.0573	0.564	0.9102	None
Eef1b2	Medulla	1	1438	-0.1572	0.04583	0.0001075	0.006077	Down	0.223	0.04504	8.97e-08	1.047e-05	Up	0.4029	0.04402	5.424e-21	9.271e-19	Up
Eef1g	Medulla	1	1129	-0.04848	0.04554	0.2065	0.9316	None	0.1737	0.05152	0.0001261	0.005857	Up	0.2439	0.04984	1.832e-07	9.319e-06	Up
Efhd1	Medulla	1	205.5	-0.3546	0.1299	0.0003191	0.01555	Down	0.04129	0.07575	0.3405	0.9411	None	0.4872	0.1215	4.122e-06	0.0001586	Up
Efhd2	Medulla	1	676.4	0.04165	0.05323	0.3141	0.9804	None	0.2178	0.06628	0.000113	0.005352	Up	0.16	0.06145	0.00309	0.04898	Up
Eid1	Medulla	1	537.2	-0.09996	0.07081	0.04273	0.5561	None	0.07698	0.06557	0.1055	0.7045	None	0.2354	0.07259	0.0002082	0.005184	Up
Eif1	Medulla	1	2815	-0.1306	0.03443	3.763e-05	0.002466	Down	0.1185	0.03405	0.0001657	0.007367	Up	0.2632	0.03378	1.148e-15	1.286e-13	Up
Eif1b	Medulla	1	1051	-0.08381	0.05104	0.04076	0.5463	None	0.1992	0.05387	2.989e-05	0.001692	Up	0.3147	0.05222	2.117e-10	1.574e-08	Up
Eif3f	Medulla	1	801.1	-0.164	0.06238	0.001249	0.04827	Down	0.198	0.0611	0.0001537	0.006918	Up	0.4039	0.05931	9.057e-13	8.25e-11	Up
Eif3h	Medulla	1	654.6	-0.04832	0.05468	0.2342	0.9496	None	0.1338	0.06508	0.008525	0.1741	None	0.2226	0.06357	9.244e-05	0.002555	Up
Eif3i	Medulla	0	528.7	-0.04868	0.06256	0.2544	0.9591	None	0.09997	0.0748	0.05159	0.5244	None	0.2069	0.07796	0.00167	0.02946	Up
Eif3j1	Medulla	0	182	-0.11	0.121	0.0457	0.5788	None	0.04677	0.07929	0.2727	0.9098	None	0.3037	0.1275	0.001662	0.02942	Up
Eif3k	Medulla	1	786.4	0.001951	0.04745	0.9581	0.9995	None	0.2024	0.06129	0.0001183	0.005524	Up	0.2059	0.05819	9.241e-05	0.002555	Up
Eif4a2	Medulla	1	2572	0.008965	0.0332	0.777	0.9982	None	0.1091	0.03662	0.001231	0.03872	Up	0.1016	0.03539	0.002537	0.04168	Up
Eif5a	Medulla	1	1335	-0.1073	0.04779	0.007592	0.1899	None	0.2257	0.04833	3.571e-07	3.422e-05	Up	0.3593	0.04705	2.429e-15	2.703e-13	Up
Emc4	Medulla	1	862.5	-0.03858	0.04968	0.2985	0.9774	None	0.1223	0.05868	0.01175	0.2177	None	0.1895	0.05761	0.0002766	0.006666	Up
Emc6	Medulla	1	585.3	-0.09499	0.06735	0.04754	0.5886	None	0.231	0.07155	0.0001281	0.005934	Up	0.381	0.06872	2.859e-09	1.881e-07	Up
Emilin2	Medulla	1	67.02	0.5466	0.2364	0.0007364	0.03114	Up	0.03287	0.08631	0.2802	0.9144	None	-0.2436	0.2387	0.01998	0.1925	None
Eml5	Medulla	1	79.93	0.07769	0.1194	0.05536	0.6245	None	-0.1861	0.3169	0.01499	0.257	None	-0.7159	0.1937	1.132e-05	0.0003975	Down
Endog	Medulla	0	204.9	-0.08333	0.0983	0.08574	0.7427	None	0.06457	0.08579	0.1736	0.828	None	0.2889	0.1202	0.001725	0.03025	Up
Enho	Medulla	1	1084	-0.3288	0.05316	4.583e-11	7.998e-09	Down	0.134	0.05146	0.002248	0.06359	None	0.4914	0.05151	1.526e-22	2.977e-20	Up
Enpp2	Medulla	1	2713	-0.1232	0.07011	0.01615	0.3162	None	-0.3819	0.07125	5.047e-09	7.092e-07	Down	-0.2123	0.07033	0.0005223	0.01152	Down
Epb41l1	Medulla	1	697.4	0.08575	0.05927	0.05529	0.6245	None	-0.06673	0.058	0.1346	0.7652	None	-0.1927	0.06262	0.0005246	0.01155	Down
Ermn	Medulla	1	793.7	0.01903	0.04955	0.6233	0.9982	None	0.2009	0.06436	0.0002238	0.009612	Up	0.1779	0.06058	0.0009922	0.01969	Up
Erp29	Medulla	1	426.9	0.2052	0.08746	0.001751	0.06295	None	0.2929	0.08659	5.348e-05	0.00287	Up	0.05598	0.06831	0.3218	0.7893	None
Errfi1	Medulla	1	201.5	0.06145	0.08512	0.1565	0.8817	None	0.4347	0.1242	2.47e-05	0.001452	Up	0.2588	0.1178	0.003444	0.05337	None
Etfb	Medulla	0	323	-0.1281	0.1036	0.02945	0.4571	None	0.04735	0.07194	0.3168	0.9281	None	0.2615	0.1012	0.001279	0.02402	Up
Etnppl	Medulla	1	166.3	0.4036	0.1423	0.0002172	0.01115	Up	-0.01999	0.07402	0.6015	0.9756	None	-0.4925	0.1365	2.001e-05	0.0006634	Down
Evi2a	Medulla	1	368.6	-0.1671	0.09458	0.008371	0.2029	None	0.121	0.08623	0.0336	0.4169	None	0.3811	0.08773	1.272e-06	5.436e-05	Up
Ewsr1	Medulla	1	387.3	0.1498	0.08668	0.01106	0.2491	None	-0.08807	0.07844	0.08598	0.6471	None	-0.3223	0.08464	1.552e-05	0.0005285	Down
Fabp5	Medulla	1	1533	-0.1142	0.04419	0.002848	0.09332	None	0.2837	0.04398	1.013e-11	2.074e-09	Up	0.4192	0.04293	1.496e-23	3.1e-21	Up
Fam107a	Medulla	1	420.2	0.328	0.0862	8.734e-06	0.0006436	Up	-0.009064	0.06041	0.8296	0.99	None	-0.3538	0.08391	2.47e-06	0.0001001	Down
Fam131b	Medulla	1	164.1	0.3733	0.1502	0.0005986	0.02626	Up	0.1411	0.1531	0.0298	0.393	None	-0.08315	0.1031	0.211	0.687	None
Fam162a	Medulla	1	528	-0.1285	0.07357	0.01493	0.3011	None	0.1174	0.0707	0.02443	0.3504	None	0.3097	0.0715	1.814e-06	7.596e-05	Up
Fam174a	Medulla	1	418.8	-0.1338	0.08452	0.01795	0.3365	None	0.08232	0.07276	0.09816	0.6829	None	0.2924	0.08169	4.322e-05	0.00132	Up
Fam174b	Medulla	1	44.3	0.6675	0.3013	0.0008819	0.03647	Up	0.118	0.2567	0.008408	0.1728	None	-0.03411	0.1118	0.4939	0.8863	None
Fam92a	Medulla	0	307.1	-0.08018	0.08733	0.1024	0.7832	None	0.06802	0.08083	0.1612	0.812	None	0.2521	0.1037	0.002052	0.03507	Up
Fam98b	Medulla	1	96.61	0.02034	0.07371	0.5248	0.9982	None	-0.2922	0.2313	0.006939	0.1518	None	-0.4655	0.1857	0.0006815	0.01425	Down
Fasn	Medulla	1	814.8	0.1736	0.06047	0.0005385	0.02433	Up	0.1291	0.06014	0.007697	0.1628	None	-0.03557	0.05201	0.4458	0.8642	None
Fau	Medulla	1	5393	-0.1417	0.02731	4.978e-08	5.539e-06	Down	0.07911	0.02675	0.001761	0.05199	None	0.2285	0.02691	4.1e-18	5.712e-16	Up
Fbxo2	Medulla	1	879.4	-0.08379	0.05674	0.05422	0.6215	None	0.1614	0.06068	0.001376	0.04249	Up	0.2864	0.05903	1.761e-07	8.983e-06	Up
Fbxo44	Medulla	0	601.8	-0.07587	0.06301	0.09349	0.7613	None	0.0574	0.05946	0.2016	0.8535	None	0.1759	0.06781	0.002658	0.04312	Up
Fbxo7	Medulla	0	161.6	-0.08849	0.1105	0.06916	0.6897	None	0.06168	0.08906	0.173	0.827	None	0.3325	0.1358	0.001212	0.02297	Up
Fdps	Medulla	1	436.6	0.3452	0.0837	2.384e-06	0.0001996	Up	0.334	0.08519	6.119e-06	0.0004158	Up	-0.006949	0.06454	0.8979	0.9833	None
Fdx1	Medulla	0	153.7	-0.0327	0.07483	0.3659	0.9932	None	0.1514	0.1525	0.02641	0.3661	None	0.3393	0.1424	0.001389	0.02548	Up
Fdx2	Medulla	1	338.9	-0.09532	0.08562	0.06374	0.6651	None	0.242	0.09499	0.0008924	0.0302	Up	0.4315	0.08967	1.216e-07	6.441e-06	Up
Fez1	Medulla	1	1207	-0.02504	0.04333	0.4855	0.9982	None	0.1217	0.05059	0.004607	0.1131	None	0.1637	0.0493	0.0003063	0.007235	Up
Fgf13	Medulla	1	255.7	0.1058	0.09767	0.05076	0.6046	None	-0.2579	0.1177	0.001921	0.05588	None	-0.4864	0.1056	2.837e-07	1.388e-05	Down
Fgfr2	Medulla	1	282.6	-0.3198	0.1066	0.0001586	0.00854	Down	-0.1453	0.1058	0.02262	0.3351	None	0.09699	0.08909	0.1417	0.5884	None
Fis1	Medulla	1	1862	-0.1367	0.04108	0.0002005	0.01049	Down	0.2519	0.04054	5.338e-11	9.621e-09	Up	0.4071	0.03968	1.029e-25	2.338e-23	Up
Fkbp1a	Medulla	1	1182	-0.03061	0.04398	0.4006	0.9952	None	0.2205	0.05165	2.334e-06	0.0001743	Up	0.268	0.04986	1.219e-08	7.379e-07	Up
Fkbp2	Medulla	1	1279	-0.1378	0.04909	0.001046	0.04128	Down	0.1603	0.04865	0.0001868	0.008194	Up	0.3263	0.04765	9.207e-13	8.342e-11	Up
Fkbp3	Medulla	1	1419	0.03277	0.04023	0.3438	0.9868	None	0.2049	0.04598	1.13e-06	9.463e-05	Up	0.1658	0.04373	5.16e-05	0.00153	Up
Fkbp5	Medulla	1	84.69	0.6526	0.1926	3.086e-05	0.002063	Up	0.4255	0.2191	0.001881	0.05502	None	-0.06494	0.1106	0.2931	0.7619	None
Fkbp8	Medulla	1	1050	-0.04022	0.04584	0.2853	0.973	None	0.1479	0.05305	0.001172	0.03743	Up	0.2102	0.05142	1.012e-05	0.0003585	Up
Fmc1	Medulla	1	624.8	-0.2058	0.06982	0.000331	0.016	Down	-0.0634	0.05933	0.1559	0.7997	None	0.1193	0.06441	0.03041	0.2523	None
Fmod	Medulla	1	24.15	-0.0159	0.07914	0.3452	0.9868	None	0.05511	0.1088	0.02345	0.3396	None	0.8359	0.3896	0.001074	0.02092	Up
Fn1	Medulla	1	158.4	0.2376	0.1968	0.008919	0.2128	None	0.8878	0.1514	2.281e-10	3.858e-08	Up	0.4693	0.1475	8.947e-05	0.002485	Up
Fndc4	Medulla	1	422.5	0.003644	0.05663	0.9612	0.9995	None	0.2137	0.08616	0.001309	0.04095	Up	0.2212	0.08042	0.001114	0.02156	Up
Folr1	Medulla	1	42.19	-0.05254	0.1004	0.04802	0.5897	None	-1.503	0.3023	3.336e-08	4.066e-06	Down	-0.9325	0.3236	0.0001664	0.004305	Down
Foxj1	Medulla	1	52.98	-0.8147	0.235	2.145e-05	0.001482	Down	-0.7882	0.2418	4.543e-05	0.002478	Down	0.003749	0.1065	0.9393	0.9876	None
Foxp2	Medulla	1	31.8	0.001379	0.07613	0.9451	0.9995	None	-0.9096	0.3893	0.0006266	0.02273	Down	-0.9526	0.3721	0.0003943	0.009004	Down
Fry	Medulla	1	272.7	0.07152	0.08167	0.1257	0.832	None	-0.1014	0.09698	0.06323	0.5789	None	-0.2925	0.1044	0.0005716	0.01237	Down
Fth1	Medulla	1	47620	0.1092	0.01963	1.278e-08	1.558e-06	Up	0.3261	0.01968	7.602e-63	4.201e-59	Up	0.2147	0.01954	1.146e-28	3.167e-26	Up
Ftl1	Medulla	1	2204	-0.02628	0.03566	0.4058	0.9964	None	0.2925	0.03933	9.423e-15	2.741e-12	Up	0.327	0.0383	1.709e-18	2.485e-16	Up
Fuom	Medulla	0	297.4	-0.07824	0.08174	0.1036	0.7856	None	0.07265	0.07858	0.1403	0.7712	None	0.2439	0.09516	0.001561	0.02805	Up
Fus	Medulla	1	327.1	0.1005	0.08771	0.05571	0.6253	None	-0.3152	0.1034	0.0001486	0.006749	Down	-0.5104	0.09574	6.887e-09	4.26e-07	Down
Fxyd6	Medulla	1	321.5	0.5588	0.1072	9.963e-09	1.233e-06	Up	0.4553	0.1107	2.19e-06	0.0001658	Up	-0.05884	0.08121	0.3366	0.8008	None
Gaa	Medulla	1	1336	0.1497	0.04932	0.0004407	0.02052	Up	0.0487	0.04493	0.2033	0.8544	None	-0.09553	0.04627	0.02473	0.2231	None
Gabarap	Medulla	1	1193	-0.00511	0.04259	0.8811	0.9982	None	0.2343	0.0515	5.996e-07	5.29e-05	Up	0.2456	0.04957	1.315e-07	6.902e-06	Up
Gabarapl1	Medulla	1	1570	0.02669	0.03974	0.4381	0.9977	None	0.2608	0.04548	9.899e-10	1.506e-07	Up	0.228	0.04379	4.05e-08	2.284e-06	Up
Gabarapl2	Medulla	1	1934	-0.005053	0.03614	0.875	0.9982	None	0.257	0.041	3.818e-11	7.034e-09	Up	0.2655	0.03972	3.913e-12	3.414e-10	Up
Gadd45gip1	Medulla	0	369.3	-0.09712	0.0857	0.06062	0.6484	None	0.06228	0.07282	0.1883	0.8414	None	0.2428	0.09112	0.001184	0.02262	Up
Gapdh	Medulla	1	10550	-0.09528	0.02094	2.359e-06	0.0001985	None	0.09683	0.02093	1.795e-06	0.0001395	None	0.1968	0.0208	7.909e-22	1.441e-19	Up
Garnl3	Medulla	1	115.4	0.1135	0.1516	0.03682	0.5196	None	-0.06965	0.1049	0.1142	0.721	None	-0.4786	0.1635	0.0002048	0.005128	Down
Gas5	Medulla	1	2120	-0.1258	0.03776	0.0002291	0.01172	Down	-0.01326	0.03457	0.6742	0.9815	None	0.1137	0.0368	0.001019	0.02003	Up
Gas7	Medulla	1	97.97	0.2794	0.2123	0.006531	0.17	None	-0.008662	0.07603	0.7951	0.9819	None	-0.3698	0.1804	0.002576	0.04203	Down
Gatad1	Medulla	1	380.5	-0.1293	0.08724	0.02218	0.3859	None	0.04941	0.06613	0.2768	0.911	None	0.2454	0.0849	0.0006078	0.01294	Up
Gatm	Medulla	1	990.9	-0.09501	0.05188	0.02357	0.3991	None	0.1383	0.05326	0.002189	0.06215	None	0.2667	0.05228	5.427e-08	2.99e-06	Up
Gde1	Medulla	1	925.8	-0.06901	0.05186	0.08391	0.7392	None	0.07883	0.05285	0.06578	0.5905	None	0.1818	0.0551	0.0002791	0.006715	Up
Gdf10	Medulla	1	25.31	0.05353	0.1041	0.01952	0.3536	None	-0.01739	0.08427	0.3734	0.9533	None	-0.7971	0.3771	0.001204	0.02289	Down
Gemin7	Medulla	1	256	-0.0224	0.06563	0.5608	0.9982	None	0.2733	0.1141	0.001095	0.03567	Up	0.3545	0.1064	7.858e-05	0.002231	Up
Gh	Medulla	1	14.75	-8.337	2.929	1.514e-07	1.559e-05	Down	-0.01657	0.08639	0.007349	0.1573	None	0.03374	0.1262	0.00065	0.01368	None
Gigyf1	Medulla	1	52.1	0.2593	0.4804	0.009449	0.2219	None	-0.03518	0.08879	0.2175	0.8675	None	-0.7269	0.2404	0.000115	0.003085	Down
Glrb	Medulla	0	1329	-0.05996	0.04569	0.1114	0.801	None	0.05146	0.04526	0.1782	0.8317	None	0.1317	0.04813	0.002849	0.04578	Up
Glrx	Medulla	1	379	-0.08371	0.07862	0.08642	0.7439	None	0.1773	0.09106	0.006231	0.14	None	0.3494	0.08667	5.54e-06	0.0002083	Up
Glrx2	Medulla	0	358	-0.08332	0.07928	0.08796	0.7494	None	0.06385	0.07215	0.1767	0.8306	None	0.2255	0.08831	0.00186	0.03229	Up
Glrx3	Medulla	1	672.1	-0.1323	0.06635	0.008875	0.212	None	0.02268	0.05232	0.5837	0.9746	None	0.1803	0.06424	0.001357	0.02509	Up
Glrx5	Medulla	1	754.6	-0.2628	0.06419	3.563e-06	0.0002854	Down	0.2041	0.06252	0.0001349	0.006213	Up	0.5049	0.06096	8.575e-18	1.165e-15	Up
Gls	Medulla	1	642.4	0.2298	0.06689	5.684e-05	0.00353	Up	-0.08938	0.06388	0.06148	0.5698	None	-0.366	0.06547	2.311e-09	1.551e-07	Down
Glul	Medulla	1	2436	-0.1323	0.03883	0.0001586	0.00854	Down	-0.3024	0.03988	2.964e-15	9.271e-13	Down	-0.157	0.03898	2.151e-05	0.0007062	Down
Gm10076	Medulla	1	135.4	-0.04499	0.08016	0.2406	0.9538	None	-0.7089	0.1508	1.273e-07	1.407e-05	Down	-0.5404	0.1514	2.145e-05	0.0007057	Down
Gm13205	Medulla	1	158.6	0.01271	0.06882	0.7278	0.9982	None	0.3222	0.1497	0.001581	0.04748	Up	0.2866	0.1377	0.003647	0.05547	None
Gm13889	Medulla	1	154.6	-0.3388	0.162	0.001573	0.05784	None	-0.002167	0.07183	0.9521	0.9926	None	0.3447	0.1522	0.001781	0.03108	Up
Gm14305	Medulla	1	98.88	-0.04485	0.08637	0.1838	0.9125	None	0.2274	0.2268	0.01199	0.2211	None	0.5547	0.1759	8.753e-05	0.002443	Up
Gm15446	Medulla	1	32.18	-5.561	0.8229	1.989e-11	3.665e-09	Down	-0.009861	0.08109	0.6784	0.9815	None	5.439	0.8201	4.803e-11	3.792e-09	Up
Gm15860	Medulla	0	35.3	-0.03596	0.08684	0.1262	0.8325	None	-0.6895	0.3437	0.001325	0.04123	Down	-0.09439	0.1577	0.07531	0.4353	None
Gm1673	Medulla	1	1232	-0.1697	0.05137	0.000145	0.007987	Down	0.000492	0.04309	0.9898	0.9982	None	0.1763	0.04979	0.0001211	0.003223	Up
Gm17018	Medulla	1	578.5	-0.1467	0.07376	0.007207	0.1827	None	0.123	0.07029	0.01863	0.2981	None	0.3317	0.0706	2.935e-07	1.427e-05	Up
Gm21860	Medulla	1	6.116	0.01892	0.0819	0.001459	0.05473	None	6.29	2.424	1.671e-06	0.0001313	Up	1.296	0.8911	0.003382	0.0527	None
Gm21887	Medulla	1	4.525	-0.000882	0.07863	0.841	0.9982	None	3.328	1.168	0.0006114	0.02238	Up	3.705	1.154	0.0002249	0.005549	Up
Gm2694	Medulla	1	121.5	-0.008611	0.06995	0.7919	0.9982	None	-0.4113	0.1782	0.0008852	0.03001	Down	-0.3783	0.1699	0.0017	0.0299	Down
Gm3764	Medulla	1	246.2	0.2157	0.1279	0.005978	0.1586	None	-0.3198	0.1317	0.000833	0.02865	Down	-0.6673	0.1172	7.724e-10	5.454e-08	Down
Gm47283	Medulla	1	103.7	4.544	0.7981	1.309e-08	1.577e-06	Up	7.813	0.8014	2.36e-21	1.123e-18	Up	3.125	0.1876	2.571e-63	6.089e-60	Up
Gm49980	Medulla	1	403.1	0.126	0.08777	0.02456	0.4069	None	-0.1453	0.09329	0.01802	0.2926	None	-0.3685	0.08847	2.89e-06	0.0001149	Down
Gm5914	Medulla	0	39.68	0.01711	0.07764	0.4532	0.9982	None	-0.07879	0.1397	0.01507	0.2576	None	-0.6662	0.3147	0.001284	0.02409	Down
Gnao1	Medulla	0	827.3	0.07373	0.05492	0.08384	0.739	None	-0.05947	0.05435	0.1701	0.8213	None	-0.1649	0.05876	0.00164	0.02918	Down
Gng11	Medulla	1	695.7	-0.3796	0.06966	3.198e-09	4.311e-07	Down	0.1631	0.06815	0.002454	0.06827	None	0.5881	0.06709	1.314e-19	2.074e-17	Up
Gng13	Medulla	1	816.3	0.06714	0.05535	0.1151	0.8039	None	-0.2793	0.0656	1.766e-06	0.0001381	Down	-0.3828	0.06275	1.034e-10	7.832e-09	Down
Gng3	Medulla	1	2110	0.06477	0.03929	0.06051	0.6481	None	0.3	0.04166	4.744e-14	1.21e-11	Up	0.2239	0.04025	5.828e-09	3.646e-07	Up
Gng4	Medulla	1	133.6	0.4315	0.1601	0.0003126	0.01529	Up	0.116	0.1462	0.04271	0.4711	None	-0.1137	0.1195	0.1142	0.5381	None
Gnl3l	Medulla	1	338.8	0.1636	0.09792	0.0102	0.2349	None	-0.03365	0.0667	0.4426	0.961	None	-0.2596	0.09316	0.0007282	0.01504	Down
Gpm6a	Medulla	1	1188	0.1241	0.04974	0.003068	0.0985	None	-0.009434	0.04351	0.7985	0.9827	None	-0.1448	0.04851	0.001153	0.0221	Down
Gpr162	Medulla	1	334.8	0.1922	0.09763	0.004395	0.1278	None	-0.02293	0.06436	0.5925	0.9746	None	-0.2621	0.09212	0.0006155	0.01307	Down
Gpr26	Medulla	1	42.6	0.04814	0.09512	0.07736	0.7234	None	-0.04731	0.09855	0.08322	0.6435	None	-0.7204	0.2806	0.0004271	0.009669	Down
Gpr37	Medulla	1	561.6	-0.2945	0.07336	4.345e-06	0.0003447	Down	-0.0519	0.05946	0.2414	0.8893	None	0.2129	0.07152	0.0005988	0.01281	Up
Gpr37l1	Medulla	1	1220	-0.216	0.05032	2.104e-06	0.0001798	Down	-0.04646	0.04461	0.2208	0.8714	None	0.1584	0.0488	0.000419	0.009517	Up
Gpr88	Medulla	1	135.4	0.02272	0.0811	0.2344	0.9497	None	-0.959	0.382	0.0003729	0.01504	Down	-1.419	0.3502	2.057e-06	8.442e-05	Down
Gprasp1	Medulla	1	1279	0.1903	0.05046	2.071e-05	0.001437	Up	0.08544	0.04851	0.03584	0.432	None	-0.09229	0.04677	0.03149	0.2573	None
Gprasp2	Medulla	0	657.8	0.1813	0.06833	0.0009817	0.03938	Up	0.08078	0.06215	0.08404	0.6437	None	-0.08085	0.05978	0.1189	0.5477	None
Gpx1	Medulla	1	935.3	-0.1009	0.05605	0.02229	0.3865	None	0.2268	0.05768	9.481e-06	0.0006313	Up	0.3644	0.05589	7.243e-12	6.065e-10	Up
Gpx3	Medulla	1	175.2	0.2532	0.1665	0.005887	0.1573	None	0.6438	0.1414	2.604e-07	2.601e-05	Up	0.2309	0.136	0.01146	0.1289	None
Gpx4	Medulla	1	4722	-0.118	0.02782	6.845e-06	0.000523	Down	0.2066	0.02773	1.367e-14	3.777e-12	Up	0.3334	0.02726	2.65e-35	9.152e-33	Up
Grb14	Medulla	1	426.1	-0.5177	0.08854	2.712e-10	4.203e-08	Down	-0.02968	0.06231	0.4943	0.964	None	0.4591	0.08819	1.474e-08	8.886e-07	Up
Grcc10	Medulla	1	1556	-0.1038	0.043	0.005306	0.1454	None	0.1249	0.04318	0.001106	0.03597	Up	0.2512	0.04266	7.111e-10	5.079e-08	Up
Gria1	Medulla	1	279.9	0.1284	0.1005	0.029	0.4531	None	-0.09644	0.09295	0.07397	0.6199	None	-0.3462	0.1007	5.567e-05	0.001639	Down
Grpel1	Medulla	1	393.2	-0.05759	0.06779	0.1949	0.9218	None	0.135	0.08489	0.02022	0.3132	None	0.2647	0.08343	0.000216	0.005345	Up
Gstm5	Medulla	1	1242	-0.1261	0.04824	0.002156	0.07446	None	0.1879	0.04813	1.498e-05	0.000937	Up	0.3407	0.04691	4.433e-14	4.455e-12	Up
Gtf2h5	Medulla	1	512.4	-0.1483	0.07545	0.007412	0.1862	None	0.02521	0.0562	0.5554	0.9726	None	0.2065	0.07225	0.0009325	0.01867	Up
Guk1	Medulla	1	1099	-0.1424	0.05358	0.001517	0.05638	None	0.2511	0.05272	1.939e-07	2.047e-05	Up	0.4244	0.05137	1.316e-17	1.746e-15	Up
H1fx	Medulla	1	78.79	-0.6051	0.1971	8.652e-05	0.005016	Down	-0.3104	0.2404	0.00638	0.1426	None	0.07023	0.1189	0.246	0.7201	None
H2afj	Medulla	1	471.5	-0.2973	0.079	1.177e-05	0.0008482	Down	0.03069	0.05804	0.4749	0.964	None	0.3589	0.07624	2.52e-07	1.247e-05	Up
H2afv	Medulla	1	353.8	-0.07682	0.07995	0.1082	0.792	None	0.1403	0.09496	0.02209	0.3304	None	0.317	0.09312	7.191e-05	0.002063	Up
H2afz	Medulla	1	1340	-0.03395	0.04164	0.3352	0.9855	None	0.2088	0.04761	1.512e-06	0.0001211	Up	0.2585	0.04602	3.319e-09	2.15e-07	Up
H3f3a	Medulla	1	1292	-0.08601	0.04749	0.02892	0.4525	None	0.08876	0.04744	0.02722	0.3728	None	0.2013	0.04836	7.915e-06	0.000289	Up
Habp4	Medulla	1	851.3	0.02229	0.0489	0.561	0.9982	None	0.1676	0.0623	0.001159	0.03723	Up	0.1414	0.0581	0.006035	0.08056	None
Hap1	Medulla	1	329.7	0.4601	0.09707	1.205e-07	1.248e-05	Up	0.1819	0.1054	0.008686	0.1767	None	-0.1941	0.09197	0.007415	0.09395	None
Hax1	Medulla	1	323.8	-0.007663	0.06038	0.8452	0.9982	None	0.3103	0.09755	0.0001006	0.004861	Up	0.3379	0.09245	2.601e-05	0.0008408	Up
Hba-a1	Medulla	1	115.4	-3.848	0.5404	5.329e-14	1.262e-11	Down	0.00208	0.08287	0.8899	0.9926	None	3.918	0.5395	1.939e-14	1.997e-12	Up
Hba-a2	Medulla	1	117.2	-2.903	0.3381	4.757e-19	2.465e-16	Down	0.007331	0.08127	0.7455	0.9815	None	3.002	0.3368	2.778e-20	4.652e-18	Up
Hbb-bs	Medulla	1	315.1	-4.178	0.3616	3.479e-32	7.211e-29	Down	0.01354	0.08288	0.5201	0.9691	None	4.391	0.3608	2.549e-35	8.991e-33	Up
Hbb-bt	Medulla	1	40.85	-3.819	0.4514	6.178e-18	2.498e-15	Down	0.00754	0.07986	0.7825	0.9815	None	3.887	0.4492	1.287e-18	1.889e-16	Up
Hcfc1r1	Medulla	1	966.2	-0.05579	0.05017	0.1607	0.8883	None	0.1041	0.05496	0.01996	0.3107	None	0.1901	0.05511	0.0001429	0.003766	Up
Hcn2	Medulla	1	1117	-0.7713	0.05106	8.04e-53	4.444e-49	Down	-0.4592	0.05087	1.142e-20	5.116e-18	Down	0.2943	0.05296	3.799e-09	2.451e-07	Up
Hebp2	Medulla	1	123.6	-0.08759	0.1209	0.05935	0.6406	None	0.08103	0.1098	0.09729	0.6812	None	0.4388	0.1559	0.00031	0.007242	Up
Hectd4	Medulla	1	447.6	0.1188	0.0792	0.02632	0.426	None	-0.05716	0.06688	0.2178	0.8675	None	-0.2394	0.07994	0.000459	0.01026	Down
Higd2a	Medulla	1	846.5	-0.09547	0.05699	0.03103	0.4703	None	0.09975	0.05675	0.0293	0.3892	None	0.2342	0.05791	1.009e-05	0.0003581	Up
Hint1	Medulla	1	3605	-0.1008	0.02994	0.0003067	0.01505	Down	0.1528	0.03011	9.029e-08	1.047e-05	Up	0.2638	0.02957	7.941e-20	1.278e-17	Up
Hist1h2bc	Medulla	1	543.3	-0.1229	0.07192	0.0177	0.3342	None	0.07067	0.06288	0.1282	0.7496	None	0.2479	0.07066	7.509e-05	0.002147	Up
Hist3h2ba	Medulla	1	228.1	-0.06312	0.0848	0.1517	0.8722	None	0.1263	0.1156	0.03895	0.4498	None	0.3382	0.1175	0.0003623	0.008366	Up
Hivep2	Medulla	0	90.16	0.03423	0.08041	0.2796	0.9717	None	-0.07854	0.1216	0.06269	0.5755	None	-0.3985	0.205	0.002831	0.04552	Down
Hmgb1	Medulla	1	544	-0.1606	0.07573	0.004581	0.1314	None	0.2409	0.07355	0.0001042	0.005009	Up	0.4588	0.07079	7.338e-12	6.114e-10	Up
Hmgcs1	Medulla	1	966.9	0.1577	0.05614	0.0008138	0.0339	Up	0.1289	0.05605	0.00539	0.1275	None	-0.02348	0.04893	0.5974	0.9196	None
Hmgn2	Medulla	0	212.1	-0.1536	0.1277	0.02002	0.3616	None	0.03047	0.07127	0.4695	0.9626	None	0.2783	0.1174	0.001993	0.03417	Up
Hnrnpa0	Medulla	1	483.3	-0.02487	0.05581	0.5358	0.9982	None	-0.2105	0.08114	0.0009872	0.0328	Down	-0.1736	0.07536	0.005868	0.07903	None
Hnrnpa2b1	Medulla	1	1191	0.1457	0.04862	0.000535	0.0243	Up	-0.0651	0.04633	0.09598	0.6766	None	-0.2351	0.04808	1.99e-07	1.006e-05	Down
Hnrnpu	Medulla	0	748.7	0.0567	0.05373	0.1662	0.8924	None	-0.08299	0.05908	0.0697	0.6057	None	-0.1761	0.06097	0.001133	0.02181	Down
Hopx	Medulla	1	336.6	-0.04095	0.06454	0.3303	0.9841	None	-0.3925	0.09561	2.442e-06	0.0001807	Down	-0.3053	0.09328	0.0001155	0.003088	Down
Hoxa5	Medulla	1	21.5	1.391	0.4119	3.347e-05	0.002211	Up	0.04242	0.0983	0.02781	0.3779	None	-0.1051	0.179	0.03661	0.2821	None
Hoxb3os	Medulla	1	76.43	-0.6441	0.204	6.42e-05	0.003885	Down	-0.07785	0.1202	0.06808	0.601	None	0.201	0.2117	0.03018	0.2512	None
Hoxb4	Medulla	1	11.08	2.555	0.6592	7.63e-06	0.0005698	Up	0.01313	0.085	0.2062	0.8559	None	-1.614	0.6003	0.0002795	0.006715	Down
Hoxb5	Medulla	1	26.14	1.693	0.3533	9.224e-08	9.741e-06	Up	0.01571	0.0842	0.3883	0.9547	None	-1.35	0.3364	2.883e-06	0.0001149	Down
Hoxc4	Medulla	1	69.16	0.8701	0.3512	0.0004209	0.01988	Up	-0.0006123	0.08136	0.9738	0.9953	None	-0.8898	0.3439	0.0003453	0.007995	Down
Hpf1	Medulla	1	267.5	-0.0327	0.06726	0.4116	0.9964	None	0.289	0.1082	0.0004862	0.01862	Up	0.3918	0.1016	9.699e-06	0.0003473	Up
Hr	Medulla	1	64.06	0.4823	0.2467	0.001642	0.05982	None	-0.02469	0.08323	0.387	0.9547	None	-0.7291	0.2233	5.229e-05	0.001548	Down
Hras	Medulla	1	634.2	-0.5742	0.07234	9.805e-17	3.387e-14	Down	-0.1227	0.07047	0.01847	0.2965	None	0.4061	0.07303	2.437e-09	1.629e-07	Up
Hsbp1	Medulla	1	1495	-0.005376	0.0397	0.8736	0.9982	None	0.2035	0.04672	1.814e-06	0.0001399	Up	0.2146	0.04502	4.277e-07	2.038e-05	Up
Hsd11b1	Medulla	1	222.5	-0.4886	0.1208	2.632e-06	0.0002149	Down	-0.1484	0.1244	0.02524	0.3586	None	0.205	0.1209	0.01448	0.1544	None
Hsd17b10	Medulla	0	168.6	-0.03781	0.07517	0.3195	0.9819	None	0.1193	0.1249	0.04507	0.4856	None	0.3004	0.1315	0.002143	0.03621	Up
Hsp90aa1	Medulla	1	4812	-0.1157	0.02793	1.104e-05	0.0007992	Down	0.05763	0.0272	0.02471	0.3526	None	0.1809	0.02762	1.838e-11	1.479e-09	Up
Hspa1b	Medulla	1	36.29	0.0114	0.0769	0.5819	0.9982	None	0.6391	0.3256	0.001513	0.04577	Up	0.4484	0.3378	0.006031	0.08056	None
Hspa5	Medulla	1	982.5	0.1138	0.05514	0.01041	0.2381	None	0.3533	0.0559	1.956e-11	3.77e-09	Up	0.2116	0.05321	1.592e-05	0.0005397	Up
Hspa8	Medulla	1	7898	-0.03397	0.0222	0.1197	0.8152	None	0.1228	0.02298	3.786e-08	4.549e-06	Up	0.1589	0.02257	7.502e-13	6.872e-11	Up
Hspb1	Medulla	1	140.6	0.08101	0.1147	0.06122	0.6517	None	0.6218	0.1584	4.086e-06	0.0002895	Up	0.3062	0.1566	0.004191	0.0621	None
Hspbp1	Medulla	1	292.8	-0.1774	0.1051	0.008195	0.1995	None	0.06491	0.07606	0.1748	0.8282	None	0.3377	0.09677	4.798e-05	0.001441	Up
Hspe1	Medulla	1	1615	-0.01207	0.03866	0.7409	0.9982	None	0.2651	0.04456	2.643e-10	4.426e-08	Up	0.2823	0.04315	9.209e-12	7.596e-10	Up
Hsph1	Medulla	1	785	0.007902	0.04796	0.8614	0.9982	None	0.1852	0.06221	0.000445	0.0172	Up	0.1808	0.05877	0.0005917	0.01269	Up
Htr5b	Medulla	1	23.25	0.0119	0.07749	0.5348	0.9982	None	-1.344	0.4157	5.488e-05	0.002935	Down	-1.577	0.393	3.286e-06	0.0001294	Down
Hypk	Medulla	1	454.4	-0.03352	0.05941	0.4119	0.9964	None	0.2673	0.08198	9.101e-05	0.004545	Up	0.343	0.07812	1.189e-06	5.135e-05	Up
Idh3b	Medulla	1	1277	-0.1301	0.04871	0.001735	0.06269	None	0.02001	0.04226	0.5839	0.9746	None	0.1637	0.04753	0.0001982	0.004993	Up
Idi1	Medulla	1	289	0.2749	0.1074	0.0006518	0.02821	Up	0.09398	0.0922	0.07882	0.6352	None	-0.1084	0.08787	0.09937	0.5032	None
Idnk	Medulla	1	247.7	-0.03785	0.06999	0.3478	0.9868	None	0.2847	0.1128	0.0007604	0.02665	Up	0.4049	0.1054	9.973e-06	0.0003549	Up
Ids	Medulla	1	967.3	0.1235	0.05383	0.005139	0.1432	None	-0.03417	0.04762	0.3895	0.9553	None	-0.1798	0.05313	0.0002098	0.005214	Down
Ier5l	Medulla	1	38.47	-0.7731	0.3143	0.000461	0.02135	Down	-0.0174	0.08239	0.4868	0.964	None	0.5155	0.3616	0.004665	0.06686	None
Ifitm1	Medulla	1	47.78	-0.07734	0.1369	0.01444	0.2956	None	0.04812	0.09764	0.1114	0.7165	None	0.8712	0.2658	4.59e-05	0.001386	Up
Ifitm10	Medulla	1	446.1	0.0167	0.05637	0.6743	0.9982	None	0.3232	0.08053	4.311e-06	0.0003029	Up	0.2944	0.0767	1.579e-05	0.0005363	Up
Igfbp2	Medulla	1	337.7	-0.5389	0.102	6.545e-09	8.348e-07	Down	-0.1211	0.09822	0.03808	0.4452	None	0.3232	0.1041	0.0001927	0.004877	Up
Igfbp6	Medulla	1	44.6	-0.005852	0.07581	0.7834	0.9982	None	0.9954	0.2631	6.89e-06	0.0004625	Up	1.086	0.2521	7.91e-07	3.544e-05	Up
Igfbp7	Medulla	1	218.1	-0.3786	0.1221	9.904e-05	0.005643	Down	-0.06707	0.08623	0.1753	0.8289	None	0.214	0.1187	0.01119	0.1266	None
Ighm	Medulla	0	180.8	-0.08294	0.1071	0.07692	0.7221	None	0.06756	0.09353	0.145	0.7786	None	0.3444	0.1387	0.001051	0.02055	Up
Il33	Medulla	1	351.1	-0.7183	0.09245	4.104e-16	1.26e-13	Down	-0.03667	0.06483	0.4049	0.9556	None	0.6444	0.09236	1.919e-13	1.861e-11	Up
Immp1l	Medulla	0	202.1	-0.0173	0.06717	0.6401	0.9982	None	0.193	0.1338	0.01159	0.216	None	0.2826	0.1211	0.002132	0.03611	Up
Impact	Medulla	1	1275	0.1409	0.04889	0.0008101	0.03383	Up	-0.004051	0.04264	0.9103	0.9926	None	-0.1533	0.04746	0.0004724	0.01051	Down
Inpp4a	Medulla	0	329.1	0.04874	0.06784	0.2579	0.9613	None	-0.1051	0.08938	0.05568	0.5439	None	-0.2335	0.09286	0.001922	0.03313	Down
Insl5	Medulla	1	8.176	0.01971	0.08154	0.09192	0.757	None	-0.01754	0.08615	0.1065	0.7054	None	-1.516	0.7376	0.001457	0.02652	Down
Iqsec2	Medulla	1	215	-0.2311	0.132	0.004711	0.1341	None	0.05702	0.08117	0.208	0.8559	None	0.4125	0.1175	3.428e-05	0.001079	Up
Iqsec3	Medulla	1	258.2	0.01547	0.06311	0.6896	0.9982	None	-0.2148	0.1175	0.005315	0.1262	None	-0.279	0.1075	0.001122	0.02169	Down
Iscu	Medulla	1	2123	-0.1443	0.04085	8.51e-05	0.004951	Down	0.2204	0.04041	6.231e-09	8.539e-07	Up	0.3833	0.03962	4.024e-23	8.137e-21	Up
Islr	Medulla	1	20.53	-0.02601	0.08364	0.08602	0.7433	None	0.04934	0.104	0.01991	0.3103	None	1.368	0.4228	5.107e-05	0.001518	Up
Itih2	Medulla	1	14.84	-0.002806	0.07778	0.823	0.9982	None	0.9848	0.55	0.001961	0.05675	None	1.17	0.4922	0.000601	0.01284	Up
Itih3	Medulla	0	280	0.1054	0.09608	0.05093	0.6053	None	-0.04985	0.07464	0.2682	0.9062	None	-0.2522	0.1025	0.001916	0.03306	Down
Itm2c	Medulla	0	1203	-0.02574	0.04485	0.4863	0.9982	None	0.1059	0.05222	0.01454	0.2513	None	0.15	0.0515	0.001362	0.02513	Up
Itpr1	Medulla	1	288.5	0.7936	0.1018	3.356e-16	1.05e-13	Up	-0.02918	0.07016	0.4863	0.964	None	-0.8717	0.1011	3.88e-19	5.848e-17	Down
Ivns1abp	Medulla	1	444.1	1.017	0.08525	4.832e-34	1.145e-30	Up	-0.06421	0.07524	0.181	0.8321	None	-1.142	0.08531	4.245e-42	2.346e-39	Down
Jakmip3	Medulla	1	65.15	0.02783	0.07894	0.3394	0.9868	None	-0.2815	0.3684	0.009301	0.1851	None	-0.6116	0.2251	0.0003101	0.007242	Down
Josd2	Medulla	1	581.6	-0.01885	0.05277	0.6299	0.9982	None	0.3139	0.07006	5.748e-07	5.151e-05	Up	0.3526	0.06727	1.685e-08	1.005e-06	Up
Jund	Medulla	1	508.9	-0.5646	0.07996	9.099e-14	2.067e-11	Down	-0.1276	0.0784	0.02056	0.3161	None	0.3795	0.081	2.658e-07	1.304e-05	Up
Jup	Medulla	0	158	0.03548	0.07443	0.347	0.9868	None	-0.1123	0.1298	0.04926	0.5098	None	-0.2993	0.1409	0.003076	0.04885	Down
Kcnab1	Medulla	1	415.7	-0.3944	0.09479	1.782e-06	0.0001547	Down	-0.001801	0.06124	0.964	0.9926	None	0.3931	0.09301	1.893e-06	7.887e-05	Up
Kcnc1	Medulla	0	787.3	-0.0594	0.05271	0.1491	0.8697	None	-0.1738	0.06223	0.0008028	0.02779	Down	-0.09941	0.05678	0.04718	0.3318	None
Kcne2	Medulla	1	42.16	-0.04371	0.09291	0.06777	0.6852	None	-0.831	0.3296	0.0003951	0.0156	Down	-0.09471	0.159	0.07037	0.4164	None
Kcng1	Medulla	1	47.29	0.03791	0.08771	0.1221	0.8221	None	-0.5659	0.3793	0.003215	0.08409	None	-1.1	0.2905	6.87e-06	0.0002554	Down
Kcng4	Medulla	1	165.7	-0.3591	0.1434	0.0005756	0.02572	Down	-0.04187	0.07919	0.3156	0.9281	None	0.2202	0.137	0.01453	0.1546	None
Kcnk12	Medulla	1	26.19	-1.27	0.3568	1.588e-05	0.001116	Down	-0.03549	0.09155	0.1269	0.7465	None	0.6331	0.4655	0.00441	0.06436	None
Kcnk3	Medulla	1	86.62	0.4238	0.2132	0.001658	0.06015	None	0.004935	0.07709	0.8697	0.9926	None	-0.4015	0.2018	0.00257	0.04199	Down
Kcnt1	Medulla	1	252.4	0.1024	0.09628	0.05521	0.6245	None	-0.08015	0.08857	0.114	0.721	None	-0.3065	0.1051	0.0003802	0.00873	Down
Kctd12	Medulla	1	169.1	0.1144	0.1231	0.04258	0.5551	None	-0.05879	0.08775	0.1886	0.8416	None	-0.3447	0.1305	0.0006954	0.01448	Down
Kdm2a	Medulla	0	73.84	0.03604	0.08238	0.2426	0.9538	None	-0.07544	0.1211	0.05772	0.5531	None	-0.4533	0.2186	0.001869	0.03241	Down
Kif1a	Medulla	1	1220	0.178	0.04953	4.657e-05	0.002992	Up	0.004902	0.04292	0.873	0.9926	None	-0.1755	0.04794	7.858e-05	0.002231	Down
Kif1b	Medulla	1	1317	0.08732	0.0458	0.02337	0.3979	None	-0.0695	0.04576	0.07213	0.615	None	-0.1807	0.04704	3.667e-05	0.001136	Down
Kif5a	Medulla	0	1257	0.09423	0.04859	0.01914	0.3506	None	-0.02382	0.04415	0.5249	0.9691	None	-0.1344	0.04865	0.002584	0.04213	Down
Kif5c	Medulla	1	700	0.1533	0.06676	0.003377	0.1052	None	-0.0567	0.05803	0.1973	0.8503	None	-0.2519	0.06537	1.909e-05	0.0006357	Down
Klc2	Medulla	1	361.6	-0.2311	0.09459	0.001134	0.04454	Down	0.03699	0.06451	0.4014	0.9556	None	0.321	0.08902	3.376e-05	0.001064	Up
Klf15	Medulla	0	141.9	0.2028	0.1777	0.01213	0.2658	None	0.3558	0.1592	0.001201	0.03808	Up	0.04973	0.09455	0.4239	0.8539	None
Klhdc2	Medulla	1	489.2	-0.05156	0.06172	0.2358	0.9514	None	0.1289	0.07597	0.01872	0.2989	None	0.2349	0.0749	0.0002992	0.00711	Up
Klk6	Medulla	1	319.6	0.2919	0.1015	0.0002531	0.01278	Up	0.05195	0.07337	0.2574	0.8991	None	-0.1846	0.09358	0.01104	0.1252	None
Kmt2a	Medulla	1	137	0.1642	0.1696	0.01941	0.3533	None	-0.03444	0.07956	0.3742	0.9533	None	-0.3624	0.1488	0.001086	0.02113	Down
Kmt2d	Medulla	1	57.39	0.04033	0.08674	0.1694	0.8963	None	-0.07533	0.1262	0.04188	0.4663	None	-0.6013	0.2413	0.0005656	0.01229	Down
Kndc1	Medulla	0	436	0.0278	0.05797	0.5438	0.9982	None	-0.1375	0.08364	0.01783	0.2907	None	-0.2036	0.08019	0.00236	0.03912	Down
Krtcap2	Medulla	0	556.2	-0.04329	0.05857	0.3001	0.9774	None	0.1148	0.07223	0.02869	0.3851	None	0.2051	0.07229	0.0009938	0.01969	Up
Kxd1	Medulla	0	242.5	-0.07522	0.09038	0.1081	0.792	None	0.07266	0.08774	0.1416	0.7725	None	0.278	0.1147	0.001752	0.03068	Up
L1cam	Medulla	1	187.2	0.2837	0.1316	0.001742	0.0628	None	-0.01032	0.06993	0.793	0.9815	None	-0.3338	0.1229	0.0005953	0.01275	Down
Lamp5	Medulla	1	1255	-0.3429	0.09917	3.214e-05	0.002132	Down	0.03295	0.06623	0.4513	0.9621	None	0.4208	0.09619	8.438e-07	3.741e-05	Up
Lamtor1	Medulla	1	548.1	-0.1151	0.07123	0.02345	0.3984	None	0.09134	0.06656	0.0597	0.5621	None	0.2669	0.07074	2.396e-05	0.0007805	Up
Lamtor2	Medulla	1	648.1	-0.1254	0.06653	0.01224	0.2664	None	0.05125	0.05611	0.2375	0.8871	None	0.2169	0.06514	0.0001819	0.00464	Up
Lamtor4	Medulla	1	619.6	-0.01712	0.05175	0.6616	0.9982	None	0.1663	0.06923	0.002535	0.06972	None	0.2065	0.06588	0.0003865	0.00884	Up
Lamtor5	Medulla	1	755.8	-0.01957	0.0496	0.6111	0.9982	None	0.2132	0.06395	9.688e-05	0.00478	Up	0.2526	0.06117	6.145e-06	0.00023	Up
Laptm4b	Medulla	1	811	-0.0541	0.05434	0.1812	0.9082	None	0.1226	0.06236	0.01277	0.2294	None	0.2192	0.06176	9.565e-05	0.00263	Up
Lars2	Medulla	1	279	-1.015	0.1087	5.087e-22	3.514e-19	Down	-0.008031	0.0646	0.8447	0.9924	None	0.9961	0.1081	1.787e-21	3.153e-19	Up
Ldhb	Medulla	1	4582	-0.1322	0.0316	6.633e-06	0.0005126	Down	-0.07746	0.03105	0.006672	0.1475	None	0.05233	0.0306	0.07628	0.438	None
Leng8	Medulla	1	110.7	0.02346	0.07314	0.4884	0.9982	None	-0.5021	0.1775	0.000204	0.008867	Down	-0.6298	0.1647	7.262e-06	0.0002682	Down
Lgi2	Medulla	1	464	-0.1174	0.07768	0.0265	0.4268	None	-0.3446	0.08266	2.114e-06	0.0001611	Down	-0.1702	0.07872	0.008539	0.1033	None
Lgi3	Medulla	1	1018	-0.215	0.06094	4.312e-05	0.002782	Down	-0.01301	0.04846	0.7251	0.9815	None	0.2	0.05898	0.0001698	0.004379	Up
Litaf	Medulla	1	330.8	-0.09934	0.08855	0.05736	0.6343	None	0.0761	0.07865	0.1265	0.7465	None	0.2719	0.0937	0.0004855	0.01078	Up
Llph	Medulla	1	304.2	-0.04142	0.06881	0.3137	0.9803	None	0.1835	0.1057	0.008426	0.1729	None	0.3093	0.09908	0.0001954	0.004938	Up
Lmo1	Medulla	1	148.8	-0.1245	0.1513	0.03242	0.4809	None	0.09724	0.1181	0.06853	0.6017	None	0.4759	0.1431	5.66e-05	0.001661	Up
Lmtk2	Medulla	1	161.8	0.2766	0.1486	0.003151	0.1005	None	-0.002137	0.07127	0.9557	0.9926	None	-0.3044	0.1362	0.002352	0.03906	Down
Lnpep	Medulla	1	264.4	0.02065	0.06383	0.6011	0.9982	None	-0.2532	0.1162	0.002023	0.05814	None	-0.3263	0.1072	0.0002276	0.005607	Down
Lrrc17	Medulla	1	38.52	-1.113	0.3302	3.095e-05	0.002063	Down	0.6024	0.3061	0.001494	0.04536	Up	2.006	0.2955	7.133e-13	6.57e-11	Up
Lrrc45	Medulla	1	123.3	0.02338	0.07239	0.4984	0.9982	None	-0.3278	0.1813	0.002976	0.07933	None	-0.467	0.1588	0.0002017	0.005066	Down
Lsm1	Medulla	1	236.6	-0.01392	0.06486	0.7126	0.9982	None	0.2244	0.1209	0.004706	0.1147	None	0.2886	0.1108	0.001029	0.02018	Up
Ly6h	Medulla	1	600.2	0.3311	0.07334	4.288e-07	4.063e-05	Up	0.341	0.07422	3.085e-07	3.045e-05	Up	0.007174	0.05906	0.8894	0.9826	None
Lysmd2	Medulla	1	512.5	-0.1027	0.07446	0.04208	0.5524	None	0.181	0.07874	0.00276	0.07453	None	0.3536	0.07559	2.974e-07	1.442e-05	Up
Lyz2	Medulla	1	60.41	-0.09085	0.1562	0.02047	0.3678	None	0.03701	0.08774	0.246	0.8938	None	0.6034	0.2322	0.0004288	0.009686	Up
Lzts3	Medulla	1	54.23	1.042	0.242	7.855e-07	7.235e-05	Up	0.02968	0.08648	0.2721	0.9094	None	-0.745	0.2388	8.277e-05	0.00233	Down
Macf1	Medulla	1	564.8	0.1359	0.0715	0.009995	0.2318	None	-0.02823	0.05647	0.5041	0.9672	None	-0.1987	0.06971	0.001017	0.02001	Down
Maf	Medulla	1	63.06	-0.65	0.249	0.0003217	0.0156	Down	-0.02269	0.08199	0.4446	0.961	None	0.4373	0.2718	0.004389	0.06421	None
Mafb	Medulla	1	53.6	-0.6488	0.2972	0.0008967	0.03697	Down	-0.01515	0.08124	0.5635	0.9726	None	0.451	0.3317	0.005794	0.07841	None
Mal	Medulla	1	1942	-0.08989	0.04013	0.01043	0.2381	None	0.1142	0.04064	0.001652	0.04926	Up	0.2236	0.04032	6.428e-09	3.991e-07	Up
Malat1	Medulla	1	399.9	-1.102	0.08761	1.39e-37	5.764e-34	Down	-0.6898	0.0866	8.946e-17	2.966e-14	Down	0.3687	0.09408	8.21e-06	0.0002985	Up
Manf	Medulla	1	454.5	0.07839	0.07261	0.09851	0.7712	None	0.5631	0.08079	1.851e-13	4.384e-11	Up	0.4275	0.07754	2.971e-09	1.947e-07	Up
Map1lc3a	Medulla	1	2037	-0.2541	0.04005	2.222e-11	4.005e-09	Down	0.2256	0.03915	9.366e-10	1.438e-07	Up	0.4954	0.03865	1.068e-38	5.058e-36	Up
Map1lc3b	Medulla	1	1711	0.009855	0.03846	0.7714	0.9982	None	0.2157	0.04465	1.73e-07	1.851e-05	Up	0.206	0.04302	4.159e-07	1.987e-05	Up
Map7	Medulla	1	350.5	0.1995	0.09499	0.003072	0.0985	None	-0.02636	0.06425	0.5413	0.9711	None	-0.2745	0.09001	0.0003002	0.00711	Down
Mapk8ip1	Medulla	1	725.3	-0.2405	0.0656	2.242e-05	0.00153	Down	-0.02136	0.05128	0.6002	0.9756	None	0.2119	0.06354	0.0001853	0.004698	Up
Mapk9	Medulla	1	693.3	-0.2604	0.06652	7.537e-06	0.0005654	Down	0.02303	0.05169	0.579	0.9746	None	0.3021	0.06451	3.642e-07	1.745e-05	Up
March2	Medulla	1	533.6	-0.06015	0.0626	0.1648	0.8913	None	0.2868	0.07479	1.009e-05	0.0006579	Up	0.3981	0.07183	2.737e-09	1.808e-07	Up
Mast3	Medulla	1	233.5	0.2135	0.121	0.005278	0.1451	None	-0.03633	0.07314	0.4096	0.9566	None	-0.3361	0.112	0.0002531	0.006153	Down
Mbd3	Medulla	1	482.1	-0.06159	0.06562	0.1674	0.8936	None	0.1521	0.07993	0.009162	0.1839	None	0.2773	0.07739	4.664e-05	0.001406	Up
Mcam	Medulla	1	96.1	-0.1397	0.2316	0.01964	0.3555	None	-0.478	0.2072	0.0007989	0.02777	Down	-0.06581	0.1155	0.2745	0.7471	None
Mcfd2	Medulla	1	245.2	0.09992	0.1008	0.05862	0.6385	None	0.3403	0.1143	0.0001788	0.007906	Up	0.1382	0.09716	0.05089	0.3468	None
Mcrip2	Medulla	0	124.6	-0.0249	0.07416	0.4557	0.9982	None	0.1804	0.1891	0.01851	0.2965	None	0.3698	0.1611	0.001493	0.02702	Up
Mea1	Medulla	1	688.6	-0.006552	0.05018	0.8651	0.9982	None	0.3084	0.06609	2.435e-07	2.477e-05	Up	0.3237	0.06353	4.117e-08	2.314e-06	Up
Med21	Medulla	0	363.7	-0.06968	0.07673	0.1336	0.8463	None	0.08324	0.08077	0.1033	0.6993	None	0.2406	0.0927	0.001452	0.02646	Up
Med28	Medulla	1	514.1	-0.05005	0.0628	0.2423	0.9538	None	0.1423	0.08002	0.01365	0.2391	None	0.2506	0.07801	0.0002082	0.005184	Up
Med29	Medulla	1	265.9	-0.03693	0.06834	0.3633	0.9928	None	0.1818	0.1096	0.009517	0.1879	None	0.3032	0.1022	0.0003314	0.007696	Up
Med30	Medulla	1	189.9	-0.07045	0.09193	0.118	0.8113	None	0.1868	0.1345	0.01297	0.2306	None	0.4252	0.1219	3.54e-05	0.001103	Up
Meg3	Medulla	1	2271	0.206	0.03674	2.618e-09	3.618e-07	Up	-0.3921	0.03886	4.392e-25	3.31e-22	Down	-0.6107	0.03737	3.487e-61	6.423e-58	Down
Metrn	Medulla	1	532.9	-0.1261	0.0734	0.01679	0.3236	None	0.1086	0.06978	0.03356	0.4169	None	0.2953	0.07165	4.218e-06	0.0001619	Up
Mff	Medulla	0	1037	-0.0922	0.05314	0.0298	0.4601	None	0.04228	0.04811	0.2947	0.9222	None	0.1586	0.05364	0.001094	0.02124	Up
Mgp	Medulla	1	351.9	0.02978	0.08463	0.1139	0.8039	None	1.032	0.3633	0.000154	0.006918	Up	0.1232	0.2078	0.02675	0.2339	None
Mgst3	Medulla	1	1209	-0.01367	0.04203	0.6993	0.9982	None	0.2754	0.04981	3.042e-09	4.425e-07	Up	0.2975	0.0481	8.69e-11	6.609e-09	Up
Mia	Medulla	1	59.33	-0.5157	0.2839	0.00197	0.06892	None	-0.6827	0.2674	0.0003767	0.01512	Down	-0.02589	0.1101	0.5908	0.9173	None
Miat	Medulla	0	168.7	0.1055	0.1238	0.04919	0.5945	None	-0.04041	0.08016	0.3218	0.9305	None	-0.3022	0.1393	0.002738	0.04434	Down
Mical3	Medulla	0	124.1	0.04482	0.08142	0.2336	0.9491	None	-0.08593	0.116	0.07799	0.6302	None	-0.3321	0.1571	0.002658	0.04312	Down
Micos10	Medulla	1	1984	-0.1946	0.03904	8.453e-08	8.984e-06	Down	0.003958	0.03498	0.9048	0.9926	None	0.2022	0.03825	3.272e-08	1.858e-06	Up
Micos13	Medulla	1	899.5	-0.1434	0.05798	0.002479	0.08287	None	0.04346	0.04944	0.2822	0.9157	None	0.214	0.05632	3.22e-05	0.001019	Up
Mid1	Medulla	1	3.965	-0.007982	0.07911	0.1779	0.9046	None	0.01944	0.087	0.03654	0.4361	None	2.484	1.119	0.001699	0.0299	Up
Mid1ip1	Medulla	0	546	-0.08525	0.07088	0.07084	0.6923	None	0.06307	0.06518	0.1774	0.8314	None	0.2074	0.07612	0.001357	0.02509	Up
Mien1	Medulla	0	769.5	-0.03601	0.05006	0.3589	0.9898	None	0.09665	0.05803	0.0352	0.4293	None	0.1603	0.05825	0.001981	0.034	Up
Mif	Medulla	1	2796	-0.03325	0.03199	0.2588	0.9629	None	0.1896	0.03452	6.493e-09	8.753e-07	Up	0.2306	0.03359	1.397e-12	1.259e-10	Up
Mirg	Medulla	1	129.9	0.06271	0.09356	0.1278	0.8364	None	-0.2739	0.1873	0.006146	0.1391	None	-0.5593	0.1532	1.54e-05	0.0005254	Down
Mlf2	Medulla	1	1436	-0.02189	0.03904	0.5164	0.9982	None	0.137	0.04464	0.0005368	0.02014	Up	0.1709	0.04318	2.499e-05	0.0008108	Up
Mllt11	Medulla	1	1255	-0.01513	0.04126	0.6815	0.9982	None	0.1491	0.04872	0.0004715	0.01814	Up	0.1746	0.04689	6.141e-05	0.001789	Up
Mmd2	Medulla	0	523.8	-0.02344	0.05645	0.5487	0.9982	None	0.1333	0.07761	0.01696	0.2794	None	0.1948	0.07525	0.002245	0.03766	Up
Mmp24	Medulla	0	75.99	0.07326	0.1153	0.0588	0.6386	None	-0.03398	0.08521	0.3007	0.9239	None	-0.4	0.2105	0.003064	0.0487	Down
Mob2	Medulla	0	257.5	0.04931	0.07388	0.2444	0.9553	None	0.2647	0.1141	0.001319	0.04119	Up	0.1542	0.09815	0.03291	0.2643	None
Morf4l1	Medulla	1	2489	-0.1143	0.0364	0.0005338	0.0243	Down	0.1419	0.03641	2.405e-05	0.001424	Up	0.2719	0.03585	5.467e-15	5.886e-13	Up
Mpc1	Medulla	1	2065	-0.1499	0.04233	7.708e-05	0.004548	Down	0.1523	0.04185	5.901e-05	0.003136	Up	0.323	0.04125	6.164e-16	7.146e-14	Up
Mpc2	Medulla	1	1686	-0.132	0.04434	0.0006783	0.02899	Down	0.1295	0.04381	0.0008473	0.02899	Up	0.2848	0.04338	7.747e-12	6.422e-10	Up
Mpp3	Medulla	1	114.6	0.04278	0.08239	0.2304	0.949	None	-0.1209	0.1648	0.0348	0.4264	None	-0.4271	0.1716	0.0007786	0.01602	Down
Mrfap1	Medulla	1	1855	-0.1133	0.04273	0.002373	0.0798	None	0.1111	0.04233	0.002993	0.07966	None	0.2462	0.04226	1.062e-09	7.46e-08	Up
Mrpl12	Medulla	1	673.9	-0.1211	0.06819	0.01622	0.3172	None	0.2007	0.06897	0.0004407	0.01707	Up	0.3755	0.06652	1.628e-09	1.12e-07	Up
Mrpl13	Medulla	1	477.3	-0.1174	0.08421	0.03048	0.4667	None	0.08151	0.07411	0.1056	0.7045	None	0.278	0.08403	0.0001245	0.003307	Up
Mrpl17	Medulla	1	351	-0.04137	0.06519	0.3294	0.9841	None	0.1947	0.09392	0.004093	0.1022	None	0.3003	0.08844	8.087e-05	0.002288	Up
Mrpl18	Medulla	1	453.2	-0.2435	0.08232	0.0002471	0.01257	Down	0.08538	0.07036	0.08305	0.6435	None	0.3919	0.07776	4.255e-08	2.367e-06	Up
Mrpl20	Medulla	1	846.9	-0.0004372	0.04638	0.9899	0.9999	None	0.2151	0.05897	3.263e-05	0.001816	Up	0.2209	0.05622	1.793e-05	0.0006007	Up
Mrpl21	Medulla	0	297.3	-0.03524	0.06907	0.3727	0.9946	None	0.1474	0.1121	0.02338	0.3396	None	0.2755	0.108	0.001277	0.024	Up
Mrpl27	Medulla	1	403.7	0.001722	0.05731	0.9654	0.9995	None	0.2527	0.08807	0.000385	0.01538	Up	0.2558	0.08287	0.0003037	0.007184	Up
Mrpl30	Medulla	1	650	-0.09671	0.06332	0.0388	0.5316	None	0.1837	0.06661	0.0007901	0.02752	Up	0.3309	0.06425	3.01e-08	1.715e-06	Up
Mrpl34	Medulla	1	586.9	-0.06554	0.06068	0.1353	0.8503	None	0.1483	0.06993	0.00617	0.1391	None	0.2646	0.06796	1.515e-05	0.000519	Up
Mrpl36	Medulla	1	293.8	-0.07548	0.0865	0.1162	0.8044	None	0.1335	0.1065	0.03104	0.4021	None	0.3354	0.1059	0.0001479	0.003875	Up
Mrpl42	Medulla	1	677.7	-0.1782	0.06859	0.001164	0.04526	Down	0.113	0.06426	0.0221	0.3304	None	0.3419	0.06535	1.847e-08	1.098e-06	Up
Mrpl43	Medulla	0	377.8	-0.06176	0.06953	0.1701	0.8969	None	0.07817	0.07414	0.1133	0.7204	None	0.2089	0.08385	0.002561	0.04188	Up
Mrpl46	Medulla	1	248.7	-0.2413	0.1164	0.002447	0.08197	None	0.03595	0.07013	0.4103	0.9566	None	0.3513	0.1071	9.472e-05	0.002609	Up
Mrpl51	Medulla	1	578.7	-0.1451	0.07835	0.009439	0.2219	None	0.1272	0.07488	0.01809	0.2928	None	0.3439	0.07499	4.729e-07	2.221e-05	Up
Mrpl54	Medulla	1	464.3	-0.0593	0.06753	0.1815	0.909	None	0.1078	0.07946	0.04519	0.4862	None	0.2366	0.08218	0.00067	0.01403	Up
Mrpl55	Medulla	1	226.2	-0.01907	0.06586	0.6132	0.9982	None	0.2077	0.1219	0.006844	0.1507	None	0.2919	0.1115	0.0009741	0.01939	Up
Mrps12	Medulla	1	552.7	-0.07079	0.06429	0.1148	0.8039	None	0.2065	0.07444	0.0005953	0.02188	Up	0.3343	0.07125	3.005e-07	1.453e-05	Up
Mrps14	Medulla	1	524.8	-0.001822	0.05378	0.9615	0.9995	None	0.2567	0.07647	6.802e-05	0.00358	Up	0.2678	0.07265	3.336e-05	0.001054	Up
Mrps18a	Medulla	1	474	-0.03689	0.05921	0.3747	0.9946	None	0.1824	0.08053	0.002947	0.07868	None	0.2658	0.0766	7.629e-05	0.002173	Up
Mrps18c	Medulla	1	346.9	-0.2325	0.09588	0.001166	0.04526	Down	-0.02506	0.06298	0.5604	0.9726	None	0.1902	0.08939	0.007394	0.09387	None
Mrps21	Medulla	1	929.5	-0.1452	0.0545	0.001435	0.05418	None	-0.1546	0.05542	0.00101	0.03336	Down	-0.007131	0.04896	0.8708	0.982	None
Mrps23	Medulla	0	282.4	-0.04333	0.07008	0.2939	0.977	None	0.1104	0.09637	0.05196	0.525	None	0.245	0.1011	0.002223	0.03739	Up
Mrps24	Medulla	1	605.4	-0.2344	0.07153	9.424e-05	0.005388	Down	0.1783	0.0694	0.001431	0.04379	Up	0.4629	0.06743	5.428e-13	5.056e-11	Up
Mrps33	Medulla	1	859.2	-0.03829	0.05028	0.3307	0.9841	None	0.1639	0.06102	0.001221	0.03856	Up	0.2309	0.05887	1.705e-05	0.0005733	Up
Mrps34	Medulla	0	389.3	-0.1023	0.08178	0.04915	0.5943	None	0.04751	0.06568	0.2932	0.9222	None	0.2137	0.0842	0.002163	0.03651	Up
Mrps36	Medulla	1	723.6	-0.1261	0.0633	0.009824	0.2291	None	0.1079	0.06085	0.02358	0.3405	None	0.2808	0.06189	8.079e-07	3.601e-05	Up
Msrb1	Medulla	1	271	-0.2871	0.1068	0.0004402	0.02052	Down	-0.04045	0.0699	0.3598	0.9504	None	0.1997	0.1007	0.009153	0.1084	None
Msx1	Medulla	1	24.72	-0.03594	0.08812	0.07886	0.7281	None	-1.152	0.3834	0.0001046	0.005011	Down	-0.1196	0.2054	0.02249	0.2091	None
Mt1	Medulla	1	9690	-0.03392	0.02455	0.1517	0.8722	None	-0.4734	0.02623	1.683e-74	1.395e-70	Down	-0.4383	0.02597	6.342e-65	1.753e-61	Down
Mt2	Medulla	1	2059	0.02262	0.03644	0.4897	0.9982	None	-0.5162	0.04292	1.552e-34	1.715e-31	Down	-0.5451	0.04203	1.356e-39	6.811e-37	Down
Mt3	Medulla	1	6598	-0.1505	0.02645	2.682e-09	3.675e-07	Down	-0.236	0.02686	1.917e-19	7.751e-17	Down	-0.08103	0.02617	0.001466	0.02665	None
Mtln	Medulla	1	380.8	-0.2359	0.09524	0.001007	0.03996	Down	-0.02546	0.06289	0.5535	0.9726	None	0.1923	0.08908	0.006757	0.08767	None
Mxd4	Medulla	1	222.3	0.1631	0.1341	0.0175	0.3316	None	0.4025	0.1246	6.656e-05	0.003514	Up	0.1212	0.1016	0.08839	0.4747	None
Mybpc1	Medulla	1	7.795	0.02389	0.08333	0.04083	0.5469	None	-0.01309	0.08498	0.2092	0.8568	None	-1.522	0.7366	0.001443	0.02632	Down
Myh7	Medulla	1	51.78	-0.008484	0.07555	0.7116	0.9982	None	0.4058	0.3377	0.005445	0.1282	None	0.5759	0.2649	0.001212	0.02297	Up
Myl12b	Medulla	1	1776	0.04927	0.03819	0.1413	0.8601	None	0.2859	0.04143	4.753e-13	1.095e-10	Up	0.2267	0.03983	2.691e-09	1.792e-07	Up
Myl6	Medulla	1	2523	-0.0513	0.03305	0.08636	0.7439	None	0.1529	0.03497	2.826e-06	0.0002055	Up	0.2154	0.0341	6.339e-11	4.934e-09	Up
Naa20	Medulla	1	411.8	-0.009576	0.05796	0.8059	0.9982	None	0.2097	0.08984	0.002022	0.05814	None	0.2432	0.08423	0.0006229	0.01321	Up
Naa38	Medulla	1	747.1	-0.166	0.06453	0.001442	0.05432	None	-0.007694	0.05014	0.8518	0.9926	None	0.1638	0.06151	0.002507	0.04123	Up
Naca	Medulla	1	1812	-0.09554	0.04142	0.008027	0.197	None	0.2085	0.0422	1.045e-07	1.174e-05	Up	0.324	0.04117	4.432e-16	5.211e-14	Up
Nap1l5	Medulla	1	3545	0.1652	0.03217	4.962e-08	5.539e-06	Up	0.1185	0.03235	8.258e-05	0.0042	Up	-0.04351	0.03047	0.1389	0.5854	None
Nat8l	Medulla	1	1463	-0.02702	0.04292	0.454	0.9982	None	0.1393	0.05015	0.001349	0.04182	Up	0.182	0.04878	5.574e-05	0.001639	Up
Naxe	Medulla	1	358.8	0.04908	0.06786	0.2405	0.9538	None	0.2987	0.09423	0.0001005	0.004861	Up	0.1985	0.08704	0.004798	0.06828	None
Nbdy	Medulla	1	519.4	0.003204	0.05497	0.9347	0.9995	None	0.2369	0.08041	0.0002994	0.01244	Up	0.239	0.07595	0.0002819	0.006764	Up
Nbl1	Medulla	1	122.1	-0.007919	0.07186	0.7881	0.9982	None	0.5315	0.1799	0.0001347	0.006213	Up	0.5933	0.1709	2.78e-05	0.0008915	Up
Ndfip1	Medulla	1	3000	-0.04313	0.03148	0.1335	0.8463	None	0.06084	0.03228	0.04065	0.4588	None	0.1124	0.03248	0.0003099	0.007242	Up
Ndn	Medulla	1	1429	0.182	0.05257	6.673e-05	0.004023	Up	0.2243	0.05293	2.75e-06	0.0002018	Up	0.03285	0.04644	0.4439	0.8636	None
Ndnf	Medulla	1	87.22	0.02312	0.07559	0.4445	0.9982	None	-0.4162	0.2279	0.002325	0.06545	None	-0.6043	0.1968	0.0001091	0.002957	Down
Ndufa1	Medulla	1	1643	-0.08324	0.04166	0.02066	0.3692	None	-0.2769	0.04475	5.741e-11	1.023e-08	Down	-0.1787	0.0435	1.229e-05	0.000428	Down
Ndufa11	Medulla	1	1947	-0.05807	0.03795	0.0817	0.7334	None	0.1201	0.04014	0.0008479	0.02899	Up	0.1946	0.03948	2.263e-07	1.137e-05	Up
Ndufa12	Medulla	1	2341	-0.192	0.04085	2.345e-07	2.314e-05	Down	0.06729	0.03832	0.04281	0.4711	None	0.2804	0.03998	3.566e-13	3.398e-11	Up
Ndufa13	Medulla	1	2983	-0.2577	0.03312	7.335e-16	2.134e-13	Down	0.01417	0.03051	0.6186	0.976	None	0.2753	0.03267	5.758e-18	7.89e-16	Up
Ndufa2	Medulla	1	2413	-0.2356	0.03813	6.837e-11	1.169e-08	Down	-0.06675	0.0363	0.04386	0.4765	None	0.1611	0.0375	6.421e-06	0.0002398	Up
Ndufa3	Medulla	1	2486	-0.06171	0.03606	0.05431	0.6215	None	-0.332	0.03928	2.313e-18	8.717e-16	Down	-0.2596	0.0386	3.06e-12	2.684e-10	Down
Ndufa4	Medulla	1	7757	-0.1793	0.02494	1.501e-13	3.363e-11	Down	0.0502	0.02414	0.03217	0.4118	None	0.2326	0.02464	7.747e-22	1.427e-19	Up
Ndufa5	Medulla	1	2147	-0.1169	0.03807	0.0006283	0.02727	Down	-0.1546	0.03907	1.609e-05	0.001003	Down	-0.03365	0.03654	0.3324	0.7983	None
Ndufa6	Medulla	1	3504	-0.1731	0.03176	8.296e-09	1.034e-06	Down	0.07494	0.03068	0.008641	0.176	None	0.2583	0.03116	2.078e-17	2.692e-15	Up
Ndufa8	Medulla	1	1257	-0.1214	0.04888	0.003259	0.1026	None	0.2214	0.04884	6.886e-07	6.041e-05	Up	0.3704	0.04756	7.144e-16	8.225e-14	Up
Ndufa9	Medulla	1	506.4	-0.0834	0.06892	0.07785	0.7259	None	0.09851	0.07083	0.05176	0.5245	None	0.2452	0.07419	0.0001567	0.004073	Up
Ndufab1	Medulla	1	1898	-0.1388	0.04343	0.0003059	0.01505	Down	0.1624	0.04311	3.192e-05	0.001782	Up	0.3232	0.04236	3.013e-15	3.287e-13	Up
Ndufaf2	Medulla	1	466.8	-0.08721	0.07371	0.07498	0.7128	None	0.1747	0.08223	0.004396	0.1089	None	0.3349	0.07884	2.319e-06	9.423e-05	Up
Ndufb1-ps	Medulla	1	1935	-0.08971	0.03721	0.006793	0.1746	None	-0.5326	0.04009	1.801e-41	2.488e-38	Down	-0.4324	0.03952	1.387e-28	3.651e-26	Down
Ndufb10	Medulla	1	1787	-0.1235	0.04236	0.0009278	0.03778	Down	0.1798	0.04231	3.634e-06	0.0002597	Up	0.3242	0.04141	6.128e-16	7.146e-14	Up
Ndufb11	Medulla	1	1633	-0.09152	0.04201	0.01177	0.2603	None	0.1793	0.04306	5.145e-06	0.0003555	Up	0.292	0.04199	5.094e-13	4.771e-11	Up
Ndufb2	Medulla	1	2198	-0.1736	0.03899	1.345e-06	0.000118	Down	-0.1257	0.03898	0.0003721	0.01504	Down	0.04293	0.03697	0.2191	0.697	None
Ndufb3	Medulla	1	1336	-0.1356	0.04786	0.0009941	0.03967	Down	0.07357	0.04483	0.05549	0.5431	None	0.2332	0.04681	1.251e-07	6.603e-06	Up
Ndufb4	Medulla	1	2039	-0.1694	0.03911	2.452e-06	0.0002043	Down	-0.1034	0.03864	0.002932	0.07844	None	0.06022	0.03727	0.08863	0.4754	None
Ndufb5	Medulla	1	2418	-0.1331	0.03658	6.744e-05	0.004045	Down	0.2405	0.0362	3.537e-12	7.616e-10	Up	0.3883	0.03548	7.308e-29	2.054e-26	Up
Ndufb6	Medulla	1	1857	-0.102	0.0401	0.003899	0.1166	None	0.1559	0.04056	2.506e-05	0.001463	Up	0.2772	0.03972	4.604e-13	4.337e-11	Up
Ndufb7	Medulla	1	1193	-0.1268	0.0514	0.003172	0.1008	None	0.1377	0.05097	0.001633	0.04888	Up	0.2959	0.05027	5.432e-10	3.95e-08	Up
Ndufb8	Medulla	1	3629	-0.2416	0.03199	4.517e-15	1.152e-12	Down	0.2008	0.03146	2.584e-11	4.868e-09	Up	0.4528	0.03115	6.228e-49	5.163e-46	Up
Ndufb9	Medulla	1	2891	-0.1261	0.03489	7.99e-05	0.004688	Down	0.2411	0.03464	3.957e-13	9.241e-11	Up	0.3808	0.034	4.234e-30	1.21e-27	Up
Ndufc1	Medulla	1	2936	-0.1722	0.03283	2.625e-08	3.002e-06	Down	-0.1875	0.03335	3.121e-09	4.485e-07	Down	-0.01421	0.03158	0.6469	0.9397	None
Ndufc2	Medulla	1	1980	-0.08674	0.04104	0.01491	0.3011	None	0.1724	0.04229	8.094e-06	0.0005411	Up	0.2793	0.04136	2.25e-12	1.995e-10	Up
Ndufs3	Medulla	1	818.2	-0.08873	0.0576	0.04444	0.5659	None	0.1244	0.05981	0.009622	0.1892	None	0.2556	0.05937	2.768e-06	0.0001109	Up
Ndufs4	Medulla	1	963	-0.03138	0.0462	0.4132	0.9964	None	0.1098	0.05379	0.01328	0.235	None	0.1621	0.0529	0.0007475	0.01541	Up
Ndufs5	Medulla	1	2674	-0.1164	0.035	0.0002607	0.0131	Down	0.08419	0.03424	0.007322	0.1573	None	0.2143	0.03454	1.306e-10	9.799e-09	Up
Ndufs6	Medulla	1	1699	-0.1301	0.04275	0.0005726	0.02566	Down	0.01338	0.03807	0.6989	0.9815	None	0.1519	0.04178	0.0001089	0.002954	Up
Ndufs7	Medulla	1	1378	-0.06713	0.0458	0.07788	0.7259	None	0.258	0.04911	1.459e-08	1.905e-06	Up	0.3485	0.04776	3.298e-14	3.334e-12	Up
Ndufs8	Medulla	1	1119	-0.1788	0.0557	0.0001802	0.009605	Down	0.08615	0.05155	0.04219	0.4685	None	0.2969	0.05388	4.794e-09	3.034e-07	Up
Ndufv2	Medulla	1	1931	-0.1719	0.04226	7.474e-06	0.0005633	Down	0.1276	0.04136	0.0005785	0.02141	Up	0.3195	0.0411	9.275e-16	1.053e-13	Up
Neat1	Medulla	1	524.6	0.0879	0.06799	0.06403	0.6661	None	-0.1586	0.07847	0.006641	0.1472	None	-0.3113	0.07439	3.421e-06	0.0001344	Down
Nedd8	Medulla	1	1780	0.009558	0.03605	0.766	0.9982	None	0.1786	0.04109	2.408e-06	0.0001791	Up	0.1699	0.03941	5.493e-06	0.0002074	Up
Nefh	Medulla	1	1644	-0.2543	0.08668	0.0002537	0.01278	Down	-0.07515	0.07182	0.123	0.7402	None	0.1341	0.07899	0.03451	0.2715	None
Nefm	Medulla	1	2497	-0.3553	0.08335	1.252e-06	0.0001116	Down	-0.086	0.0735	0.0851	0.6448	None	0.2137	0.08182	0.001779	0.03108	Up
Nell2	Medulla	0	172.9	0.02629	0.07788	0.3692	0.994	None	-0.0954	0.1488	0.03716	0.4385	None	-0.4253	0.2209	0.002667	0.04323	Down
Nenf	Medulla	1	1006	-0.1121	0.05518	0.01154	0.2574	None	0.2614	0.05556	2.396e-07	2.452e-05	Up	0.4075	0.05399	4.127e-15	4.472e-13	Up
Nfasc	Medulla	0	456.7	-0.03045	0.05856	0.4548	0.9982	None	-0.2088	0.08627	0.001575	0.0474	Down	-0.1602	0.07906	0.01296	0.1422	None
Nfix	Medulla	1	121.1	-0.3993	0.1607	0.0005562	0.02506	Down	-0.3595	0.1671	0.001405	0.04323	Down	0.01124	0.09337	0.847	0.9789	None
Ninj1	Medulla	1	163	-0.2442	0.15	0.005268	0.1451	None	0.02225	0.07207	0.5788	0.9746	None	0.3497	0.1331	0.0007057	0.01466	Up
Nkiras1	Medulla	1	686	0.02191	0.0515	0.5894	0.9982	None	0.201	0.06815	0.0004239	0.01654	Up	0.1717	0.06366	0.002089	0.03545	Up
Nme1	Medulla	1	1654	-0.06835	0.04346	0.06363	0.6648	None	0.2148	0.04634	4.762e-07	4.338e-05	Up	0.3041	0.04512	2.19e-12	1.953e-10	Up
Nme2	Medulla	1	1152	-0.01588	0.04269	0.6584	0.9982	None	0.2211	0.05112	1.8e-06	0.0001395	Up	0.2478	0.04919	8.516e-08	4.599e-06	Up
Nnat	Medulla	1	433.4	0.01352	0.06965	0.6911	0.9982	None	0.4058	0.1526	0.0003668	0.01491	Up	0.3509	0.1484	0.001369	0.02519	Up
Npc2	Medulla	1	657.4	0.0003469	0.05017	0.9916	0.9999	None	0.1591	0.06725	0.003023	0.0802	None	0.1683	0.06335	0.002364	0.03915	Up
Npm1	Medulla	1	740.1	-0.0573	0.0539	0.1651	0.8913	None	0.1682	0.06226	0.001114	0.03607	Up	0.2627	0.06008	1.958e-06	8.136e-05	Up
Nptxr	Medulla	1	186.6	0.2596	0.1542	0.004543	0.1305	None	-0.03481	0.07822	0.3799	0.9533	None	-0.4187	0.1386	0.0001746	0.004475	Down
Npy	Medulla	1	83.01	1.814	0.2133	1.053e-18	4.989e-16	Up	0.08197	0.1368	0.0324	0.4124	None	-1.315	0.1995	2.368e-12	2.089e-10	Down
Nr1d2	Medulla	1	402.4	-0.2771	0.08744	0.0001078	0.006077	Down	-0.07101	0.0714	0.1414	0.7722	None	0.1577	0.08191	0.01654	0.1678	None
Nr2f2	Medulla	1	102.5	-0.5143	0.1808	0.0001823	0.009672	Down	-0.02535	0.07841	0.478	0.964	None	0.3837	0.1844	0.002291	0.03829	Up
Nrbp2	Medulla	1	373.2	0.1488	0.08848	0.01205	0.2646	None	-0.1723	0.0942	0.008082	0.1689	None	-0.4131	0.08673	1.628e-07	8.462e-06	Down
Nrcam	Medulla	1	440.4	0.07749	0.07658	0.1089	0.7933	None	-0.1796	0.09728	0.006921	0.1516	None	-0.3443	0.09075	1.276e-05	0.0004426	Down
Nrep	Medulla	1	282.2	-0.00634	0.06107	0.8807	0.9982	None	-0.3152	0.1085	0.0002261	0.009685	Down	-0.3093	0.1031	0.0002855	0.00683	Down
Nrtn	Medulla	1	64.03	-0.3994	0.3005	0.004694	0.1341	None	0.3705	0.2646	0.004762	0.1156	None	1.108	0.2143	1.203e-08	7.305e-07	Up
Nsa2	Medulla	1	286.7	-0.0834	0.08571	0.08931	0.7522	None	0.1547	0.1014	0.01687	0.2785	None	0.3507	0.09725	2.955e-05	0.000942	Up
Nsg1	Medulla	1	1514	0.06231	0.04075	0.07593	0.7169	None	0.1668	0.04412	2.888e-05	0.001651	Up	0.09628	0.04104	0.0122	0.1354	None
Nt5c3	Medulla	1	263.6	0.1396	0.1111	0.02428	0.405	None	0.3102	0.1115	0.0003414	0.01397	Up	0.09097	0.08647	0.158	0.616	None
Ntan1	Medulla	1	404.7	-0.1834	0.09158	0.004526	0.1303	None	0.04574	0.06544	0.305	0.9239	None	0.2908	0.08605	8.984e-05	0.002491	Up
Ntrk1	Medulla	1	27.76	0.0561	0.107	0.01783	0.3359	None	-0.01862	0.08451	0.3543	0.9496	None	-0.8095	0.3643	0.0009402	0.01878	Down
Ntrk3	Medulla	0	206.6	0.1598	0.1304	0.01835	0.3414	None	-0.0324	0.07383	0.4349	0.9599	None	-0.2961	0.121	0.001477	0.02682	Down
Nudc	Medulla	1	628	-0.237	0.06834	4.724e-05	0.003012	Down	-0.008065	0.05171	0.8348	0.9904	None	0.2292	0.06604	9.928e-05	0.002721	Up
Nudt19	Medulla	0	414.6	-0.06311	0.06861	0.1615	0.8904	None	0.07908	0.07278	0.109	0.7125	None	0.2079	0.08151	0.002199	0.03705	Up
Nudt4	Medulla	1	784.3	-0.2762	0.06301	9.359e-07	8.573e-05	Down	0.01242	0.0494	0.7729	0.9815	None	0.2984	0.06146	1.585e-07	8.266e-06	Up
Oaz1	Medulla	1	2923	-0.01601	0.03119	0.5825	0.9982	None	0.2209	0.03403	1.118e-11	2.26e-09	Up	0.2413	0.03308	5.918e-14	5.875e-12	Up
Ociad2	Medulla	1	178.6	0.02383	0.07167	0.5008	0.9982	None	-0.264	0.1736	0.006176	0.1391	None	-0.4006	0.1506	0.0005323	0.01164	Down
Oga	Medulla	0	451.2	0.09426	0.07377	0.05816	0.6374	None	-0.05789	0.06644	0.2118	0.8596	None	-0.2118	0.07852	0.001415	0.0259	Down
Ogdh	Medulla	1	861.4	-0.1641	0.05759	0.0006634	0.02857	Down	-0.0766	0.05306	0.07445	0.6204	None	0.07528	0.05273	0.1091	0.5259	None
Ogn	Medulla	1	20.35	-0.003083	0.07753	0.8221	0.9982	None	0.9808	0.4759	0.00115	0.03702	Up	1.134	0.4378	0.0003436	0.007967	Up
Ogt	Medulla	1	431.2	0.1129	0.0796	0.03281	0.4839	None	-0.05297	0.06653	0.2492	0.8943	None	-0.2288	0.08117	0.000855	0.0174	Down
Olfm1	Medulla	1	1352	0.07194	0.04392	0.05251	0.6116	None	-0.05528	0.04383	0.1411	0.7722	None	-0.1467	0.04564	0.0005327	0.01164	Down
Olig1	Medulla	1	1196	-0.1914	0.05093	2.197e-05	0.001511	Down	0.04522	0.04463	0.2412	0.8893	None	0.2554	0.04948	4.177e-08	2.34e-06	Up
Olig2	Medulla	1	170.9	-0.3614	0.144	0.0005631	0.0253	Down	-0.02129	0.07255	0.5983	0.9752	None	0.2938	0.1396	0.003299	0.0515	None
Omg	Medulla	0	614	-0.1153	0.06721	0.01994	0.3605	None	0.03746	0.05506	0.3777	0.9533	None	0.1889	0.06632	0.001127	0.02173	Up
Opalin	Medulla	1	236	-1.232	0.1153	5.828e-28	6.902e-25	Down	-0.0421	0.07242	0.3367	0.9402	None	1.131	0.1154	5.901e-24	1.271e-21	Up
Osr1	Medulla	1	3.96	-0.002731	0.07867	0.536	0.9982	None	2.395	1.152	0.002174	0.06184	None	3.351	1.193	0.0006314	0.01337	Up
Ostc	Medulla	1	279.2	0.02375	0.06479	0.6118	0.9982	None	0.3153	0.1079	0.0002207	0.009502	Up	0.2698	0.1014	0.0009892	0.01966	Up
Pabpn1	Medulla	1	57.92	-0.8232	0.2362	2.026e-05	0.001412	Down	0.00541	0.07794	0.8574	0.9926	None	0.871	0.2305	7.617e-06	0.0002794	Up
Paf1	Medulla	0	111.2	0.03245	0.07711	0.3415	0.9868	None	-0.1412	0.1896	0.02694	0.371	None	-0.4014	0.1736	0.001295	0.02423	Down
Pafah1b3	Medulla	0	159.8	-0.06064	0.08955	0.1449	0.8636	None	0.08656	0.1067	0.08825	0.6548	None	0.3353	0.1383	0.001262	0.02377	Up
Paip2	Medulla	1	1151	-0.1015	0.05094	0.01501	0.3015	None	0.06232	0.04765	0.1178	0.7289	None	0.1905	0.05096	4.974e-05	0.001483	Up
Pam	Medulla	1	140.2	0.0254	0.07179	0.4778	0.9982	None	-0.333	0.1656	0.002027	0.05815	None	-0.4638	0.1479	0.0001093	0.002957	Down
Pam16	Medulla	0	578.8	-0.03327	0.05472	0.4139	0.9964	None	0.1164	0.06869	0.02335	0.3396	None	0.186	0.06783	0.001587	0.02842	Up
Pantr1	Medulla	1	190.4	-0.1593	0.141	0.01931	0.3531	None	0.07686	0.09421	0.1325	0.7597	None	0.4017	0.1243	9.389e-05	0.00259	Up
Panx2	Medulla	0	430.8	0.1274	0.08309	0.02179	0.3811	None	-0.02974	0.06191	0.4928	0.964	None	-0.2046	0.08163	0.002547	0.04176	Down
Paqr4	Medulla	1	368.1	-0.1592	0.09578	0.01093	0.2476	None	0.05864	0.07084	0.2117	0.8596	None	0.2965	0.09011	0.0001184	0.003158	Up
Park7	Medulla	1	1068	-0.02156	0.04343	0.5769	0.9982	None	0.1547	0.05183	0.0005575	0.02087	Up	0.1897	0.04984	3.876e-05	0.001192	Up
Paxbp1	Medulla	1	141.7	0.0517	0.08452	0.1902	0.9186	None	-0.1148	0.1401	0.0432	0.4734	None	-0.3854	0.1497	0.000712	0.01478	Down
Pcbd1	Medulla	1	267.6	0.2328	0.125	0.003917	0.1166	None	0.4559	0.1157	4.436e-06	0.0003103	Up	0.1268	0.09798	0.07151	0.4209	None
Pcbd2	Medulla	0	236.7	-0.1178	0.1111	0.03946	0.5357	None	0.03863	0.07244	0.3749	0.9533	None	0.2565	0.1117	0.002786	0.04492	Up
Pcbp1	Medulla	1	715.3	-0.2021	0.06514	0.0002097	0.01083	Down	-0.204	0.06605	0.0002407	0.01026	Down	-0.001559	0.05589	0.9755	0.996	None
Pcp2	Medulla	1	316.7	0.6641	0.09599	2.451e-13	5.324e-11	Up	-0.2838	0.113	0.0007783	0.02717	Down	-1.021	0.09765	8.363e-27	1.981e-24	Down
Pcp4	Medulla	1	2721	0.3419	0.07367	2.467e-07	2.42e-05	Up	0.2181	0.07511	0.0003881	0.01543	Up	-0.08882	0.06585	0.1083	0.5248	None
Pcsk1n	Medulla	1	6015	-0.1358	0.02518	1.781e-08	2.094e-06	Down	0.3229	0.02479	6.938e-40	8.848e-37	Up	0.4653	0.02443	6.203e-82	5.143e-78	Up
Pdap1	Medulla	0	294.9	-0.05195	0.07175	0.2278	0.949	None	0.114	0.09354	0.04595	0.49	None	0.2578	0.09672	0.001064	0.02075	Up
Pdcd2	Medulla	0	93.98	-0.1687	0.3311	0.01473	0.2998	None	0.02177	0.07958	0.506	0.9676	None	0.446	0.2097	0.001719	0.03019	Up
Pdcl3	Medulla	1	218.3	-0.2418	0.1294	0.003597	0.1102	None	0.03562	0.07265	0.402	0.9556	None	0.3669	0.1172	0.0001462	0.003842	Up
Pde6d	Medulla	0	281.1	-0.0513	0.07351	0.2292	0.949	None	0.1179	0.09937	0.04349	0.4744	None	0.2715	0.1024	0.001004	0.01981	Up
Pde9a	Medulla	0	61.78	0.02383	0.0777	0.3905	0.9952	None	-0.08641	0.1414	0.03351	0.4168	None	-0.4691	0.2432	0.002434	0.04024	Down
Pdk4	Medulla	1	33.32	0.7944	0.3325	0.0005854	0.02581	Up	0.08404	0.1524	0.009186	0.1839	None	-0.03975	0.1161	0.3988	0.8381	None
Pdlim2	Medulla	1	428.4	-0.1976	0.09228	0.002915	0.09497	None	0.07852	0.07449	0.1142	0.721	None	0.3543	0.08619	3.853e-06	0.0001493	Up
Pdxk	Medulla	1	370	0.3055	0.0902	4.687e-05	0.003001	Up	0.05198	0.06926	0.2564	0.8991	None	-0.2067	0.08524	0.003112	0.04924	Down
Pea15a	Medulla	1	1549	0.1821	0.04533	8.473e-06	0.0006271	Up	0.1886	0.04588	6.175e-06	0.0004179	Up	0.005216	0.04068	0.892	0.9826	None
Pebp1	Medulla	1	2194	-0.04379	0.03487	0.1611	0.8894	None	0.1435	0.03754	2.916e-05	0.001661	Up	0.2001	0.03659	1.181e-08	7.201e-07	Up
Peg10	Medulla	1	38.55	0.8377	0.3012	0.0002071	0.01073	Up	0.0895	0.1621	0.01072	0.2043	None	-0.0612	0.1248	0.2364	0.7135	None
Peg3	Medulla	1	914.8	0.1839	0.06046	0.0003032	0.015	Up	0.1041	0.05845	0.02484	0.3539	None	-0.06436	0.05334	0.1766	0.6425	None
Pet100	Medulla	1	371.2	-0.09909	0.08039	0.05259	0.6116	None	-0.4535	0.09015	2.923e-08	3.599e-06	Down	-0.2842	0.08931	0.0001812	0.00463	Down
Pex5l	Medulla	1	431.5	-0.2716	0.09016	0.0001777	0.009506	Down	-0.2945	0.09112	8.926e-05	0.004471	Down	-0.0126	0.07009	0.8134	0.9739	None
Pfdn1	Medulla	1	730.4	-0.04543	0.05392	0.2622	0.965	None	0.1702	0.06565	0.001291	0.04046	Up	0.255	0.06325	9.14e-06	0.0003294	Up
Pfdn2	Medulla	1	1044	-0.2466	0.05468	6.069e-07	5.668e-05	Down	0.1855	0.0534	7.692e-05	0.003936	Up	0.4615	0.05238	1.018e-19	1.623e-17	Up
Pfdn4	Medulla	1	360	-0.03443	0.0636	0.4023	0.9952	None	0.2227	0.09477	0.00165	0.04926	Up	0.3156	0.08916	4.44e-05	0.001348	Up
Pfdn5	Medulla	1	2063	-0.158	0.04019	1.546e-05	0.001095	Down	0.1558	0.03967	1.788e-05	0.00109	Up	0.3324	0.03906	2.125e-18	3.05e-16	Up
Pfn1	Medulla	1	541.1	-0.09894	0.07034	0.04389	0.5631	None	0.2815	0.07356	1.091e-05	0.0007012	Up	0.4376	0.07081	5.369e-11	4.219e-09	Up
Pfn2	Medulla	0	1981	-0.02624	0.03516	0.3997	0.9952	None	0.07581	0.03764	0.02441	0.3503	None	0.1121	0.03744	0.00158	0.02832	Up
Pgam1	Medulla	1	2841	0.005542	0.03247	0.8526	0.9982	None	0.1312	0.03592	7.324e-05	0.003797	Up	0.1283	0.03475	0.0001115	0.003005	Up
Pgm2l1	Medulla	0	387.1	0.1169	0.08233	0.03016	0.4634	None	-0.04809	0.06642	0.2906	0.9204	None	-0.2286	0.08323	0.001064	0.02075	Down
Pgp	Medulla	1	714.5	-0.09645	0.06178	0.03705	0.52	None	0.1664	0.06474	0.001626	0.04876	Up	0.311	0.06279	9.122e-08	4.895e-06	Up
Pgrmc1	Medulla	1	906.5	0.126	0.06241	0.01015	0.2341	None	0.2207	0.06404	6.873e-05	0.003597	Up	0.07303	0.05586	0.1389	0.5854	None
Phactr3	Medulla	1	345.7	0.228	0.09723	0.001369	0.05232	None	0.2525	0.09763	0.0007381	0.02604	Up	0.01328	0.07	0.8166	0.9745	None
Phf5a	Medulla	1	242.3	-0.02237	0.06621	0.5646	0.9982	None	0.2105	0.1198	0.006267	0.1404	None	0.2999	0.11	0.000686	0.01431	Up
Phlda3	Medulla	1	545.9	-0.08326	0.07047	0.07942	0.7281	None	0.217	0.07921	0.0006244	0.02271	Up	0.3663	0.07576	1.315e-07	6.902e-06	Up
Phldb1	Medulla	1	395.6	-0.1654	0.09184	0.00819	0.1995	None	-0.2376	0.09341	0.0009303	0.03129	Down	-0.04221	0.07225	0.4653	0.8752	None
Phpt1	Medulla	1	357.9	0.01723	0.05948	0.664	0.9982	None	0.2601	0.09209	0.0003756	0.01511	Up	0.2304	0.08579	0.001241	0.02347	Up
Phyhipl	Medulla	1	995.4	-0.1795	0.05723	0.0002137	0.011	Down	-0.03826	0.04842	0.3428	0.9437	None	0.1348	0.05444	0.005767	0.07811	None
Pi4kb	Medulla	1	29.07	-0.08278	0.1571	0.003722	0.1124	None	0.003578	0.08083	0.8763	0.9926	None	0.6883	0.3709	0.002068	0.03522	Up
Pigyl	Medulla	1	363.8	-0.01358	0.0603	0.7289	0.9982	None	0.2138	0.09758	0.002475	0.06862	None	0.2631	0.09123	0.0005415	0.01181	Up
Pin1	Medulla	1	756.8	-0.1191	0.06038	0.01148	0.2564	None	0.0776	0.05574	0.07863	0.6344	None	0.2367	0.05948	1.291e-05	0.0004468	Up
Pitpna	Medulla	0	1235	-0.04623	0.0444	0.2101	0.9366	None	0.07634	0.0472	0.05702	0.55	None	0.1424	0.04817	0.001297	0.02424	Up
Pkp4	Medulla	1	555.2	0.1669	0.07591	0.003588	0.1102	None	-0.04075	0.05991	0.3527	0.949	None	-0.2511	0.07343	0.0001007	0.002754	Down
Plaat3	Medulla	1	465.5	-0.04604	0.06293	0.2781	0.9717	None	0.1561	0.0835	0.009262	0.1848	None	0.2617	0.08037	0.0001656	0.004291	Up
Plch2	Medulla	1	77.75	0.03422	0.0813	0.2649	0.9689	None	-0.137	0.244	0.01941	0.3055	None	-0.5486	0.212	0.0004666	0.0104	Down
Plcxd2	Medulla	1	324.3	0.2301	0.1	0.001572	0.05784	None	-0.1254	0.09871	0.0351	0.4289	None	-0.4617	0.0953	9.593e-08	5.107e-06	Down
Plekhb1	Medulla	1	2516	-0.04881	0.03361	0.1074	0.7912	None	0.07663	0.03475	0.01543	0.2625	None	0.1364	0.03477	4.044e-05	0.001242	Up
Plekhm2	Medulla	0	230.1	0.01554	0.0642	0.6833	0.9982	None	-0.1809	0.1236	0.01269	0.2286	None	-0.2552	0.1125	0.003011	0.04809	Down
Plin3	Medulla	1	183.2	0.3991	0.1277	9.021e-05	0.005193	Up	0.04758	0.0807	0.2753	0.911	None	-0.2567	0.1224	0.004348	0.0639	None
Plin4	Medulla	1	66.32	0.5397	0.2255	0.0006136	0.02677	Up	-0.002682	0.07827	0.9254	0.9926	None	-0.5753	0.2156	0.0003691	0.008499	Down
Pllp	Medulla	1	636.3	-0.2679	0.06819	6.895e-06	0.0005244	Down	0.1064	0.06323	0.02817	0.3813	None	0.4195	0.06523	1.1e-11	8.944e-10	Up
Pltp	Medulla	1	268.8	-0.1346	0.1057	0.02535	0.4174	None	-0.2926	0.1107	0.0005323	0.02001	Down	-0.0841	0.08729	0.1919	0.6612	None
Plxna4	Medulla	1	92.72	0.1085	0.1593	0.03338	0.4881	None	-0.05077	0.09326	0.1746	0.8282	None	-0.4868	0.1822	0.0004202	0.009531	Down
Pmm1	Medulla	1	901.7	-0.09861	0.05415	0.02253	0.3895	None	0.153	0.05568	0.001163	0.03723	Up	0.288	0.05433	1.641e-08	9.82e-07	Up
Pnisr	Medulla	1	229	0.007143	0.0637	0.8502	0.9982	None	-0.276	0.1254	0.001705	0.05065	None	-0.3142	0.116	0.0006665	0.01397	Down
Podxl2	Medulla	1	1008	-0.4503	0.05352	2.462e-18	1.074e-15	Down	0.06089	0.04743	0.1247	0.7435	None	0.5316	0.05249	3.08e-25	6.901e-23	Up
Polr2f	Medulla	1	711.7	-0.1191	0.06188	0.01246	0.2687	None	0.03346	0.05145	0.4304	0.9594	None	0.1799	0.06066	0.0008553	0.0174	Up
Polr2j	Medulla	1	434.9	-0.06582	0.06927	0.1477	0.8668	None	0.1193	0.08089	0.03126	0.4043	None	0.2578	0.08169	0.0002385	0.005832	Up
Polr2l	Medulla	1	178.1	-0.05386	0.08122	0.1974	0.9228	None	-0.4774	0.1338	1.811e-05	0.0011	Down	-0.3093	0.1336	0.001899	0.03279	Down
Polr3e	Medulla	1	306.1	0.2153	0.1072	0.003387	0.1054	None	0.7416	0.09641	7.999e-16	2.55e-13	Up	0.4503	0.09143	6.543e-08	3.568e-06	Up
Pomp	Medulla	1	1071	-0.106	0.05131	0.01186	0.2619	None	0.2165	0.05213	3.965e-06	0.0002821	Up	0.3532	0.0506	3.246e-13	3.111e-11	Up
Pop5	Medulla	1	598.6	-0.1669	0.07229	0.002828	0.09285	None	0.225	0.07032	0.0001445	0.006601	Up	0.4448	0.06782	4.55e-12	3.95e-10	Up
Por	Medulla	0	232.6	0.1045	0.1017	0.05488	0.6245	None	-0.05458	0.07926	0.2307	0.8794	None	-0.2743	0.1104	0.001548	0.02787	Down
Pou4f1	Medulla	1	52.95	0.005366	0.07453	0.8289	0.9982	None	-1.565	0.2806	1.318e-09	1.987e-07	Down	-1.62	0.2749	2.168e-10	1.598e-08	Down
Ppdpf	Medulla	1	506.7	-0.08867	0.07058	0.06632	0.677	None	0.1143	0.07363	0.03056	0.3984	None	0.2695	0.07483	4.573e-05	0.001384	Up
Ppia	Medulla	1	10230	-0.07334	0.02096	0.0002992	0.01485	None	0.2064	0.02117	2.819e-23	1.87e-20	Up	0.284	0.02085	5.206e-43	3.083e-40	Up
Ppp1r11	Medulla	1	548.2	-0.01836	0.0543	0.6429	0.9982	None	0.2104	0.07556	0.0005833	0.02154	Up	0.2544	0.07173	6.187e-05	0.0018	Up
Ppp1r14a	Medulla	1	819.7	-0.2237	0.06217	2.42e-05	0.001638	Down	-0.02066	0.04952	0.6024	0.9756	None	0.2015	0.06016	0.0001963	0.004955	Up
Ppp1r17	Medulla	1	37.32	0.9875	0.2983	3.894e-05	0.002542	Up	0.02398	0.08556	0.2955	0.9222	None	-0.6238	0.3091	0.001634	0.02911	Down
Ppp1r1a	Medulla	1	236	-0.09481	0.1011	0.06741	0.684	None	0.237	0.1191	0.003315	0.08641	None	0.4731	0.1096	1.143e-06	4.946e-05	Up
Ppp1r2	Medulla	0	591.9	-0.02964	0.05392	0.4513	0.9982	None	0.1138	0.06795	0.02535	0.3589	None	0.1783	0.06715	0.002208	0.03717	Up
Praf2	Medulla	1	546.7	-0.03001	0.0558	0.4554	0.9982	None	0.1961	0.07532	0.00107	0.03508	Up	0.2625	0.0717	3.815e-05	0.001176	Up
Prdx1	Medulla	1	1696	-0.009067	0.03698	0.7827	0.9982	None	0.2071	0.04236	1.618e-07	1.742e-05	Up	0.2206	0.04086	1.508e-08	9.059e-07	Up
Prdx2	Medulla	0	1634	-0.09691	0.04365	0.009684	0.2265	None	0.0162	0.03951	0.6458	0.9815	None	0.1239	0.0432	0.00208	0.03533	Up
Prdx5	Medulla	1	2213	-0.1202	0.03903	0.0005826	0.02581	Down	0.1766	0.03903	9.716e-07	8.219e-05	Up	0.3154	0.03826	2.248e-17	2.867e-15	Up
Prdx6	Medulla	1	1115	-0.1982	0.05181	1.597e-05	0.001117	Down	0.005573	0.04326	0.8811	0.9926	None	0.2108	0.05036	6.574e-06	0.0002449	Up
Prelid1	Medulla	1	1067	-0.03048	0.04483	0.4075	0.9964	None	0.2871	0.05255	3.763e-09	5.332e-07	Up	0.3349	0.05081	5.148e-12	4.4e-10	Up
Prg4	Medulla	1	12.36	-0.01826	0.08161	0.01866	0.3452	None	2.755	0.6249	7.244e-07	6.289e-05	Up	5.374	1.034	1.673e-07	8.641e-06	Up
Prkar1b	Medulla	1	1509	0.07587	0.04288	0.03811	0.5259	None	0.1728	0.04568	2.69e-05	0.001554	Up	0.08707	0.04219	0.02677	0.2339	None
Prkcd	Medulla	1	74.06	0.2848	0.2659	0.007765	0.1927	None	-0.05741	0.1019	0.1071	0.7068	None	-0.7184	0.2001	1.652e-05	0.0005579	Down
Prkcg	Medulla	1	45.27	0.4475	0.3199	0.004022	0.1193	None	-0.01954	0.08296	0.4397	0.961	None	-0.7328	0.2633	0.0002353	0.00577	Down
Prmt1	Medulla	1	310.9	-0.02471	0.06294	0.5335	0.9982	None	0.1803	0.1009	0.007992	0.1676	None	0.2613	0.0944	0.0007774	0.01601	Up
Prph	Medulla	1	88.17	0.6307	0.1968	5.637e-05	0.003514	Up	-0.7974	0.2257	1.756e-05	0.001078	Down	-1.589	0.2022	2.267e-16	2.744e-14	Down
Prxl2b	Medulla	1	584.7	-0.3126	0.07312	1.325e-06	0.0001169	Down	0.1501	0.07074	0.005888	0.1346	None	0.5135	0.06975	1.366e-14	1.424e-12	Up
Psap	Medulla	1	4857	0.01111	0.03014	0.7228	0.9982	None	-0.1106	0.03294	0.0002758	0.01159	Down	-0.1256	0.03235	5.263e-05	0.001556	Down
Psenen	Medulla	1	530.7	-0.04355	0.05863	0.2966	0.9774	None	0.1672	0.07556	0.003954	0.09917	None	0.2575	0.07243	5.862e-05	0.001717	Up
Psma2	Medulla	1	856.3	-0.04957	0.05049	0.2136	0.9408	None	0.2169	0.05874	2.604e-05	0.00151	Up	0.2953	0.05657	2.368e-08	1.378e-06	Up
Psmb1	Medulla	1	1142	-0.06461	0.04649	0.08977	0.7525	None	0.0961	0.04877	0.02126	0.3217	None	0.1853	0.04904	4.508e-05	0.001366	Up
Psmb4	Medulla	1	1001	-0.02667	0.04536	0.4695	0.9982	None	0.1304	0.05397	0.003929	0.09872	None	0.1769	0.05236	0.0002207	0.005452	Up
Psmb6	Medulla	1	878.2	-0.04093	0.04867	0.2888	0.9765	None	0.135	0.05706	0.003704	0.09477	None	0.2051	0.05556	4.988e-05	0.001485	Up
Psmb7	Medulla	1	842.6	-0.0208	0.04885	0.5886	0.9982	None	0.1281	0.06106	0.009501	0.1877	None	0.169	0.05917	0.001346	0.02503	Up
Psmc1	Medulla	1	586.8	-0.116	0.06875	0.02071	0.3692	None	0.05735	0.05895	0.1956	0.8486	None	0.22	0.06808	0.0002461	0.006008	Up
Psmc5	Medulla	1	1006	-0.2646	0.05788	4.168e-07	3.971e-05	Down	0.07973	0.05261	0.05981	0.5625	None	0.3758	0.0561	2.105e-12	1.887e-10	Up
Psmd10	Medulla	1	116.1	-0.04094	0.0819	0.2401	0.9538	None	0.1613	0.1871	0.02274	0.3358	None	0.4413	0.1631	0.000418	0.009507	Up
Psmd12	Medulla	1	467.1	-0.1467	0.07999	0.00973	0.2272	None	0.03491	0.05942	0.422	0.9594	None	0.2258	0.07662	0.0005917	0.01269	Up
Psme2	Medulla	1	145.6	-0.007229	0.06844	0.8301	0.9982	None	0.2513	0.1586	0.006093	0.1382	None	0.3125	0.1405	0.002303	0.03833	Up
Ptgds	Medulla	1	9776	-0.5855	0.1375	1.218e-06	0.0001092	Down	0.7364	0.1349	2.321e-09	3.406e-07	Up	1.394	0.1321	2.536e-27	6.277e-25	Up
Ptges3	Medulla	1	604.9	-0.0842	0.06477	0.0691	0.6897	None	0.09788	0.06612	0.04615	0.49	None	0.2365	0.06871	0.0001031	0.002816	Up
Ptma	Medulla	1	1732	-0.2371	0.04395	7.071e-09	8.922e-07	Down	0.0862	0.04165	0.01838	0.2965	None	0.3421	0.04285	1.614e-16	1.982e-14	Up
Ptn	Medulla	1	740.4	-0.05716	0.05722	0.1785	0.9055	None	0.1201	0.06569	0.01742	0.2859	None	0.2208	0.06539	0.0001487	0.003888	Up
Ptpmt1	Medulla	1	382.9	-0.1599	0.09019	0.009097	0.2158	None	0.1532	0.08647	0.01162	0.2162	None	0.3995	0.08388	1.702e-07	8.735e-06	Up
Ptpn11	Medulla	1	426.9	0.0374	0.06036	0.3928	0.9952	None	-0.1523	0.08654	0.01184	0.2188	None	-0.2399	0.08224	0.0005818	0.01253	Down
Ptprn	Medulla	1	840.2	0.1869	0.06453	0.0004548	0.02112	Up	0.03236	0.05265	0.4443	0.961	None	-0.1468	0.06059	0.005846	0.07884	None
Pvalb	Medulla	1	2976	-0.3678	0.03794	2.315e-23	1.827e-20	Down	-0.004442	0.0341	0.8894	0.9926	None	0.3633	0.03764	5.356e-23	1.07e-20	Up
Qdpr	Medulla	1	2624	-0.2294	0.04087	2.106e-09	2.984e-07	Down	0.2077	0.04024	3.459e-08	4.186e-06	Up	0.4538	0.03971	2.556e-31	7.849e-29	Up
Qk	Medulla	1	1821	-0.1066	0.04056	0.002861	0.09356	None	0.02537	0.0372	0.4465	0.961	None	0.1429	0.04002	0.0001515	0.003955	Up
Rab37	Medulla	0	125.5	0.04962	0.08493	0.1932	0.9213	None	-0.08105	0.1127	0.08525	0.6448	None	-0.3494	0.1605	0.002139	0.03619	Down
Rab3a	Medulla	1	3355	-0.0114	0.02949	0.68	0.9982	None	0.17	0.03202	2.109e-08	2.69e-06	Up	0.1854	0.03111	7.73e-10	5.454e-08	Up
Rab3c	Medulla	1	379.4	0.2301	0.09231	0.0009432	0.03814	Up	0.006212	0.06124	0.8814	0.9926	None	-0.2295	0.08702	0.00143	0.02613	Down
Rab5if	Medulla	1	422	-0.09831	0.07944	0.05456	0.6225	None	0.07041	0.07081	0.1436	0.7759	None	0.2419	0.083	0.0005769	0.01246	Up
Rabac1	Medulla	1	1558	-0.009967	0.03963	0.7696	0.9982	None	0.2758	0.04611	2.125e-10	3.633e-08	Up	0.2916	0.04469	9.777e-12	8.025e-10	Up
Rack1	Medulla	1	1146	-0.03531	0.04503	0.3404	0.9868	None	0.2221	0.05266	2.908e-06	0.0002106	Up	0.2766	0.05087	8.234e-09	5.056e-07	Up
Ramac	Medulla	1	364.6	-0.1303	0.09276	0.024	0.4027	None	0.1307	0.08947	0.02639	0.3661	None	0.3605	0.08927	5.152e-06	0.0001959	Up
Ramp1	Medulla	1	626.9	-0.1767	0.07154	0.001653	0.06011	None	0.235	0.06935	6.877e-05	0.003597	Up	0.4634	0.067	3.805e-13	3.605e-11	Up
Ranbp1	Medulla	1	443.4	-0.0001357	0.05535	0.9985	0.9999	None	0.1938	0.08205	0.002092	0.05983	None	0.2062	0.07656	0.00151	0.02727	Up
Rap1a	Medulla	0	431.1	-0.0479	0.06319	0.2655	0.9694	None	0.09128	0.0744	0.07311	0.6185	None	0.196	0.07914	0.002996	0.048	Up
Rarres2	Medulla	0	46.77	-0.06176	0.1097	0.03798	0.5251	None	-0.59	0.3003	0.001489	0.04531	Down	-0.06038	0.1251	0.2351	0.712	None
Rasgrp2	Medulla	1	326.2	-0.1067	0.09249	0.04781	0.589	None	0.3057	0.09707	0.0001087	0.005196	Up	0.5108	0.09238	2.277e-09	1.535e-07	Up
Rbm5	Medulla	1	247.3	0.09238	0.09265	0.0714	0.6937	None	-0.126	0.1086	0.0377	0.443	None	-0.3545	0.1065	7.974e-05	0.00226	Down
Rbms1	Medulla	0	75.26	0.009642	0.07271	0.7428	0.9982	None	-0.2716	0.291	0.009415	0.1872	None	-0.4138	0.2143	0.002812	0.04527	Down
Rbp1	Medulla	1	101.3	-0.6875	0.1709	2.582e-06	0.0002119	Down	-0.07082	0.1053	0.1068	0.7063	None	0.3936	0.1836	0.001946	0.03343	Up
Rbp4	Medulla	1	28.97	0.001069	0.07664	0.9525	0.9995	None	0.8258	0.3657	0.0007741	0.02708	Up	0.8267	0.3451	0.0006074	0.01294	Up
Rbx1	Medulla	1	1110	-0.05395	0.04576	0.1464	0.865	None	0.115	0.05004	0.006716	0.1483	None	0.1949	0.0494	2.103e-05	0.0006947	Up
Reep5	Medulla	1	1605	0.03221	0.03908	0.3417	0.9868	None	0.1452	0.04425	0.0002338	0.009991	Up	0.1099	0.04178	0.00488	0.06903	None
Rell2	Medulla	1	934.2	-0.1294	0.06258	0.00898	0.2139	None	0.1197	0.06098	0.01341	0.2366	None	0.2921	0.06126	2.473e-07	1.228e-05	Up
Resp18	Medulla	1	1973	0.137	0.04129	0.0002056	0.01069	Up	0.4004	0.04104	1.229e-23	8.489e-21	Up	0.2479	0.03944	6.111e-11	4.779e-09	Up
Rex1bd	Medulla	1	652.3	-0.2066	0.07331	0.0004668	0.0215	Down	0.2703	0.07048	1.012e-05	0.0006579	Up	0.528	0.06836	8.27e-16	9.456e-14	Up
Rgcc	Medulla	1	142.9	-0.05971	0.0921	0.1355	0.8503	None	0.3857	0.1533	0.0005654	0.021	Up	0.6346	0.1419	4.427e-07	2.097e-05	Up
Rgs10	Medulla	1	516.4	0.07361	0.06715	0.1096	0.7953	None	0.3676	0.07701	1.227e-07	1.365e-05	Up	0.2465	0.07327	0.0001268	0.003363	Up
Rgs4	Medulla	0	372.6	0.1269	0.08602	0.02326	0.3973	None	-0.03728	0.06473	0.3991	0.9556	None	-0.223	0.08509	0.001598	0.02854	Down
Rgs8	Medulla	1	176	0.4981	0.133	8.86e-06	0.00065	Up	-0.09279	0.1149	0.07388	0.6199	None	-0.7602	0.1306	3.407e-10	2.5e-08	Down
Rhbdl1	Medulla	1	246.9	0.02936	0.06753	0.4558	0.9982	None	0.2846	0.1161	0.0009608	0.03205	Up	0.2105	0.1056	0.008059	0.09964	None
Rheb	Medulla	1	789.3	-0.0192	0.05005	0.6221	0.9982	None	0.2012	0.0651	0.0002463	0.01044	Up	0.2404	0.0623	2.06e-05	0.0006818	Up
Rhoa	Medulla	1	580	-0.1578	0.08093	0.006718	0.1735	None	0.01481	0.05714	0.7248	0.9815	None	0.2011	0.07695	0.001996	0.03417	Up
Rhog	Medulla	0	325.4	-0.108	0.1007	0.04714	0.5866	None	0.04423	0.07225	0.3029	0.9239	None	0.251	0.1049	0.002261	0.03786	Up
Rhoq	Medulla	1	305.9	-0.1505	0.1043	0.01673	0.323	None	0.03751	0.06806	0.3941	0.9556	None	0.2626	0.09822	0.001004	0.01981	Up
Rictor	Medulla	0	96.76	0.04894	0.08861	0.1646	0.8913	None	-0.06906	0.109	0.08883	0.6575	None	-0.4141	0.1912	0.001726	0.03025	Down
Rims4	Medulla	1	135.1	0.3004	0.1688	0.003236	0.1023	None	-0.2462	0.1977	0.008997	0.1815	None	-0.7667	0.1511	2.147e-08	1.262e-06	Down
Rit2	Medulla	1	981.7	0.02131	0.04503	0.5662	0.9982	None	0.1893	0.05507	8.39e-05	0.004254	Up	0.1644	0.05198	0.0005277	0.0116	Up
Rnaseh2c	Medulla	1	356.8	-0.0486	0.06703	0.2629	0.9662	None	0.2176	0.09258	0.001762	0.05199	None	0.3341	0.08725	1.345e-05	0.0004635	Up
Rnasek	Medulla	1	1583	0.01731	0.03775	0.6334	0.9982	None	0.1748	0.04336	9.574e-06	0.0006336	Up	0.1586	0.0414	4.735e-05	0.001425	Up
Rnd2	Medulla	1	1203	-0.1159	0.04924	0.00504	0.1414	None	0.2464	0.04926	6.007e-08	7.165e-06	Up	0.3895	0.04794	4.438e-17	5.574e-15	Up
Rnf112	Medulla	1	219	0.2329	0.1239	0.003824	0.1146	None	-0.02564	0.07089	0.5368	0.9691	None	-0.33	0.1148	0.0003807	0.008731	Down
Rnf13	Medulla	1	894	-0.1585	0.05721	0.0009064	0.03711	Down	0.07481	0.05187	0.07627	0.6262	None	0.2654	0.05531	2.32e-07	1.162e-05	Up
Rnf227	Medulla	0	852.4	-0.03453	0.05027	0.3791	0.9952	None	0.1029	0.0592	0.0275	0.375	None	0.1656	0.05915	0.001648	0.02926	Up
Rnf7	Medulla	1	900.4	-0.06433	0.05466	0.1242	0.8297	None	0.2283	0.06173	2.347e-05	0.001395	Up	0.3291	0.05964	4.004e-09	2.553e-07	Up
Romo1	Medulla	1	1066	-0.06882	0.04805	0.07901	0.7281	None	-0.26	0.05416	1.537e-07	1.676e-05	Down	-0.172	0.05209	0.0003074	0.007242	Down
Rpl10	Medulla	1	1769	-0.3605	0.04282	2.699e-18	1.147e-15	Down	0.2463	0.04162	3.551e-10	5.887e-08	Up	0.6219	0.04139	3.46e-52	3.374e-49	Up
Rpl10a	Medulla	1	1841	-0.1227	0.04209	0.001001	0.03979	Down	0.1818	0.04207	2.561e-06	0.0001887	Up	0.3245	0.04118	4.069e-16	4.819e-14	Up
Rpl11	Medulla	1	4741	-0.1683	0.02769	2.161e-10	3.446e-08	Down	0.1555	0.0274	3.138e-09	4.485e-07	Up	0.3325	0.02707	1.424e-35	5.133e-33	Up
Rpl12	Medulla	1	2011	-0.2102	0.04024	2.159e-08	2.504e-06	Down	0.1544	0.03948	1.886e-05	0.001137	Up	0.3823	0.03901	1.162e-23	2.439e-21	Up
Rpl13	Medulla	1	5541	-0.1436	0.02585	6.533e-09	8.348e-07	Down	0.2415	0.02556	3.781e-22	1.959e-19	Up	0.3925	0.02518	9.186e-56	1.015e-52	Up
Rpl13a	Medulla	1	5130	-0.2237	0.02719	2.378e-17	8.572e-15	Down	0.2582	0.02668	3.888e-23	2.302e-20	Up	0.4889	0.02642	1.429e-77	5.922e-74	Up
Rpl14	Medulla	1	3119	-0.254	0.03335	2.56e-15	6.959e-13	Down	0.2474	0.03261	3.708e-15	1.138e-12	Up	0.5119	0.03229	1.088e-57	1.388e-54	Up
Rpl15	Medulla	1	2405	-0.1294	0.03618	8.873e-05	0.005126	Down	0.1919	0.03598	1.5e-08	1.943e-06	Up	0.3365	0.03526	1.68e-22	3.239e-20	Up
Rpl17	Medulla	1	5172	-0.2407	0.02797	8.219e-19	4.008e-16	Down	0.1901	0.02757	8.852e-13	1.957e-10	Up	0.4387	0.02734	5.291e-59	8.773e-56	Up
Rpl18	Medulla	1	2021	-0.1433	0.03943	5.875e-05	0.003621	Down	0.1947	0.03903	9.185e-08	1.053e-05	Up	0.3558	0.03824	1.534e-21	2.735e-19	Up
Rpl18a	Medulla	1	3110	-0.2023	0.0341	3.883e-10	5.853e-08	Down	0.1471	0.03357	2.771e-06	0.0002024	Up	0.3624	0.03326	1.35e-28	3.61e-26	Up
Rpl19	Medulla	1	3809	-0.1756	0.03114	2.784e-09	3.783e-07	Down	0.2017	0.03074	7.868e-12	1.651e-09	Up	0.388	0.03031	1.691e-38	7.377e-36	Up
Rpl21	Medulla	1	6549	-0.1403	0.02643	2.601e-08	2.994e-06	Down	0.1324	0.02626	1.359e-07	1.492e-05	Up	0.2805	0.02603	5.99e-28	1.528e-25	Up
Rpl22	Medulla	1	1387	-0.2864	0.0483	2.526e-10	3.989e-08	Down	-0.03687	0.0425	0.3151	0.9281	None	0.2402	0.04766	8.938e-08	4.811e-06	Up
Rpl22l1	Medulla	1	2438	-0.2056	0.03626	1.811e-09	2.611e-07	Down	-0.01471	0.03307	0.6315	0.9783	None	0.1909	0.03564	2.528e-08	1.466e-06	Up
Rpl23	Medulla	1	4689	-0.1934	0.02857	1.848e-12	3.691e-10	Down	0.03688	0.02715	0.1503	0.7904	None	0.2359	0.02816	1.123e-17	1.501e-15	Up
Rpl23a	Medulla	1	3359	-0.2437	0.03324	2.328e-14	5.676e-12	Down	0.1001	0.03234	0.0008266	0.02849	Up	0.3552	0.03259	1.292e-28	3.511e-26	Up
Rpl24	Medulla	1	3781	-0.1947	0.03072	3.298e-11	5.816e-09	Down	0.1791	0.0303	6.114e-10	9.564e-08	Up	0.384	0.02993	1.129e-38	5.059e-36	Up
Rpl26	Medulla	1	5406	-0.3079	0.03004	1.061e-25	8.797e-23	Down	0.156	0.02963	2.93e-08	3.599e-06	Up	0.4728	0.02954	9.006e-59	1.357e-55	Up
Rpl27	Medulla	1	2151	-0.2251	0.03801	3.544e-10	5.391e-08	Down	0.03248	0.03467	0.3044	0.9239	None	0.2662	0.03729	1.604e-13	1.564e-11	Up
Rpl27a	Medulla	1	4447	-0.2304	0.0279	1.657e-17	6.246e-15	Down	0.08178	0.02712	0.001405	0.04323	None	0.3198	0.02741	2.319e-32	7.255e-30	Up
Rpl28	Medulla	1	3810	-0.2242	0.03172	1.796e-13	3.97e-11	Down	0.06779	0.03043	0.01675	0.2773	None	0.3012	0.03119	6.633e-23	1.309e-20	Up
Rpl29	Medulla	1	2339	-0.2098	0.03702	1.854e-09	2.65e-07	Down	0.2203	0.03628	1.596e-10	2.786e-08	Up	0.444	0.03574	1.743e-36	6.567e-34	Up
Rpl3	Medulla	1	2808	-0.165	0.03508	4.456e-07	4.198e-05	Down	0.2547	0.03446	1.596e-14	4.339e-12	Up	0.4327	0.0339	2.415e-38	1.027e-35	Up
Rpl30	Medulla	1	3223	-0.275	0.03476	2.348e-16	7.785e-14	Down	-0.01339	0.03184	0.6545	0.9815	None	0.2607	0.0344	6.188e-15	6.619e-13	Up
Rpl31	Medulla	1	2348	-0.217	0.03644	3.145e-10	4.828e-08	Down	-0.09541	0.03578	0.003421	0.08905	None	0.1132	0.03556	0.0008271	0.01693	Up
Rpl32	Medulla	1	4125	-0.192	0.02899	4.617e-12	8.799e-10	Down	0.04525	0.02764	0.08146	0.6413	None	0.2443	0.02853	2.134e-18	3.05e-16	Up
Rpl34	Medulla	1	3647	-0.2691	0.03077	1.743e-19	9.321e-17	Down	-0.1158	0.03061	7.353e-05	0.003797	Down	0.1487	0.03049	4.603e-07	2.174e-05	Up
Rpl35	Medulla	1	1244	-0.3641	0.04676	4.702e-16	1.418e-13	Down	-0.7475	0.04903	9.209e-54	3.054e-50	Down	-0.3682	0.04953	1.118e-14	1.173e-12	Down
Rpl35a	Medulla	1	4779	-0.2987	0.02769	3.398e-28	4.334e-25	Down	-0.1215	0.02762	2.304e-06	0.0001728	Down	0.1681	0.02758	3.767e-10	2.751e-08	Up
Rpl36	Medulla	1	3402	-0.2485	0.03383	2.256e-14	5.584e-12	Down	-0.286	0.0343	7.431e-18	2.621e-15	Down	-0.03451	0.03275	0.2741	0.7468	None
Rpl36a	Medulla	1	1554	-0.3133	0.04373	6.074e-14	1.418e-11	Down	-0.1779	0.04413	9.592e-06	0.0006336	Down	0.1211	0.04288	0.00245	0.04045	Up
Rpl36al	Medulla	1	1491	-0.2351	0.0445	1.313e-08	1.577e-06	Down	0.02627	0.03915	0.4434	0.961	None	0.2718	0.04355	6.956e-11	5.389e-09	Up
Rpl37	Medulla	1	4946	-0.189	0.02725	3.777e-13	8.028e-11	Down	-0.3263	0.02779	1.484e-32	1.537e-29	Down	-0.1309	0.02736	1.495e-06	6.305e-05	Down
Rpl37a	Medulla	1	4028	-0.3291	0.03079	9.189e-28	1.016e-24	Down	-0.2945	0.03116	3.071e-22	1.642e-19	Down	0.03189	0.03009	0.2719	0.7448	None
Rpl38	Medulla	1	5188	-0.2528	0.02814	2.713e-20	1.666e-17	Down	-0.4738	0.02876	3.784e-62	1.568e-58	Down	-0.2147	0.02867	1.81e-14	1.875e-12	Down
Rpl39	Medulla	1	2836	-0.263	0.03263	7.32e-17	2.582e-14	Down	-0.4475	0.03354	8.557e-42	1.29e-38	Down	-0.1759	0.03331	4.225e-08	2.359e-06	Down
Rpl4	Medulla	1	2385	-0.03691	0.03316	0.2181	0.9454	None	0.1824	0.03583	6.228e-08	7.376e-06	Up	0.2288	0.0348	1.051e-11	8.586e-10	Up
Rpl41	Medulla	1	5579	-0.3061	0.02652	7.001e-32	1.29e-28	Down	-0.3858	0.02697	1.296e-47	3.069e-44	Down	-0.07555	0.0265	0.003117	0.04927	None
Rpl5	Medulla	1	1716	-0.1225	0.04386	0.001366	0.05231	None	0.2566	0.04361	4.161e-10	6.633e-08	Up	0.4003	0.04264	5.937e-22	1.106e-19	Up
Rpl6	Medulla	1	3057	-0.09238	0.03291	0.002069	0.07176	None	0.2898	0.03306	1.822e-19	7.552e-17	Up	0.3939	0.03239	5.015e-35	1.697e-32	Up
Rpl7	Medulla	1	2172	-0.1893	0.0376	6.835e-08	7.359e-06	Down	0.1842	0.03696	1.048e-07	1.174e-05	Up	0.3888	0.03636	1.155e-27	2.903e-25	Up
Rpl7a	Medulla	1	1722	-0.1183	0.04186	0.001322	0.05086	None	0.19	0.04189	8.929e-07	7.631e-05	Up	0.3287	0.04093	1.185e-16	1.466e-14	Up
Rpl8	Medulla	1	3175	-0.1125	0.03217	0.0001527	0.008329	Down	0.2713	0.03198	2.176e-18	8.389e-16	Up	0.3951	0.03136	2.068e-37	8.162e-35	Up
Rpl9	Medulla	1	4368	-0.2405	0.02916	1.729e-17	6.371e-15	Down	0.2048	0.02868	1.37e-13	3.291e-11	Up	0.4539	0.02842	1.744e-58	2.409e-55	Up
Rplp0	Medulla	1	1433	-0.1694	0.05025	0.0001137	0.006391	Down	0.2263	0.04934	5.452e-07	4.913e-05	Up	0.4221	0.04826	2.015e-19	3.151e-17	Up
Rplp1	Medulla	1	9281	-0.2125	0.02244	3.644e-22	2.627e-19	Down	0.1111	0.02217	2.124e-07	2.215e-05	Up	0.3292	0.02212	6.571e-51	6.053e-48	Up
Rplp2	Medulla	1	2488	-0.2926	0.0366	1.096e-16	3.707e-14	Down	-0.04368	0.03407	0.1572	0.8017	None	0.2423	0.03628	4.844e-12	4.161e-10	Up
Rpp25	Medulla	0	64.64	-0.05155	0.09716	0.07763	0.7246	None	0.03989	0.09021	0.2021	0.8535	None	0.501	0.254	0.002069	0.03522	Up
Rps10	Medulla	1	3516	-0.2506	0.03215	6.428e-16	1.903e-13	Down	0.1703	0.03163	1.393e-08	1.833e-06	Up	0.4316	0.03136	3.992e-44	2.451e-41	Up
Rps11	Medulla	1	3632	-0.2877	0.03362	1.086e-18	5.001e-16	Down	0.1206	0.03293	7.871e-05	0.004015	Up	0.4197	0.033	4.422e-38	1.788e-35	Up
Rps12	Medulla	1	4110	-0.2787	0.03096	2.168e-20	1.383e-17	Down	0.09954	0.03018	0.0004101	0.01611	None	0.3877	0.03044	3.715e-38	1.54e-35	Up
Rps13	Medulla	1	3219	-0.1683	0.03317	6.717e-08	7.279e-06	Down	0.1183	0.03261	9.616e-05	0.00476	Up	0.2991	0.03244	4.256e-21	7.428e-19	Up
Rps14	Medulla	1	3907	-0.3666	0.03012	3.173e-35	8.767e-32	Down	0.1706	0.02947	1.375e-09	2.054e-07	Up	0.5455	0.02947	1.243e-77	5.922e-74	Up
Rps15	Medulla	1	4688	-0.1499	0.0303	1.555e-07	1.582e-05	Down	0.1369	0.03003	1.439e-06	0.0001158	Up	0.2973	0.02976	2.293e-24	5.07e-22	Up
Rps15a	Medulla	1	2848	-0.2396	0.03342	8.068e-14	1.858e-11	Down	-0.06684	0.0322	0.02435	0.3498	None	0.1659	0.033	1.76e-07	8.983e-06	Up
Rps16	Medulla	1	3202	-0.2237	0.03309	1.539e-12	3.111e-10	Down	0.1415	0.03253	3.494e-06	0.0002508	Up	0.3771	0.03229	1.77e-32	5.643e-30	Up
Rps17	Medulla	1	2234	-0.2493	0.03715	1.915e-12	3.78e-10	Down	-0.04936	0.03478	0.1166	0.7254	None	0.1929	0.03666	4.009e-08	2.269e-06	Up
Rps18	Medulla	1	1897	-0.306	0.0402	2.228e-15	6.156e-13	Down	0.2057	0.03925	2.144e-08	2.713e-06	Up	0.5268	0.03889	6.572e-43	3.757e-40	Up
Rps19	Medulla	1	3091	-0.3062	0.03446	5.166e-20	2.954e-17	Down	0.1624	0.03383	3.261e-07	3.181e-05	Up	0.4802	0.03367	3.098e-47	2.233e-44	Up
Rps2	Medulla	1	2134	-0.1005	0.03927	0.003784	0.1139	None	0.3337	0.03925	1.527e-18	6.027e-16	Up	0.4505	0.03844	8.772e-33	2.852e-30	Up
Rps20	Medulla	1	4042	-0.2318	0.02928	2.788e-16	8.888e-14	Down	0.03437	0.02767	0.1873	0.8394	None	0.2715	0.02886	8.744e-22	1.576e-19	Up
Rps21	Medulla	1	5999	-0.2399	0.02531	2.6e-22	1.96e-19	Down	-0.3575	0.02578	6.16e-45	1.135e-41	Down	-0.1105	0.02543	4.953e-06	0.0001888	Down
Rps23	Medulla	1	3733	-0.3597	0.0324	9.438e-30	1.423e-26	Down	0.02133	0.02995	0.4516	0.9621	None	0.3843	0.03208	4.64e-34	1.539e-31	Up
Rps24	Medulla	1	6033	-0.2685	0.02587	3.025e-26	2.786e-23	Down	0.118	0.02544	1.619e-06	0.0001285	Up	0.392	0.02545	1.565e-54	1.622e-51	Up
Rps25	Medulla	1	2499	-0.2505	0.03575	2.473e-13	5.324e-11	Down	0.0516	0.03343	0.09023	0.6611	None	0.3121	0.03509	7.895e-20	1.278e-17	Up
Rps26	Medulla	1	3337	-0.2702	0.0342	2.561e-16	8.327e-14	Down	-0.1731	0.03444	9.206e-08	1.053e-05	Down	0.0896	0.03345	0.005131	0.07143	None
Rps27	Medulla	1	2677	-0.3781	0.0338	3.402e-30	5.64e-27	Down	-0.3632	0.03435	2.971e-27	2.463e-24	Down	0.01672	0.03301	0.6724	0.9456	None
Rps27a	Medulla	1	5549	-0.2257	0.02706	8.815e-18	3.48e-15	Down	0.1178	0.02664	3.339e-06	0.0002407	Up	0.3515	0.02659	7.923e-41	4.238e-38	Up
Rps28	Medulla	1	2375	-0.1858	0.03497	1.614e-08	1.911e-06	Down	-0.4579	0.03615	6.186e-38	7.325e-35	Down	-0.261	0.03586	5.838e-14	5.831e-12	Down
Rps29	Medulla	1	4903	-0.3202	0.03016	1.994e-27	2.066e-24	Down	-0.4139	0.03061	8.092e-43	1.342e-39	Down	-0.08933	0.03007	0.002321	0.03859	None
Rps3	Medulla	1	2920	-0.2134	0.03449	7.117e-11	1.204e-08	Down	0.2541	0.03376	6.034e-15	1.819e-12	Up	0.4792	0.03332	5.857e-48	4.625e-45	Up
Rps3a1	Medulla	1	3426	-0.178	0.03136	2.204e-09	3.071e-07	Down	0.2849	0.03069	1.601e-21	8.046e-19	Up	0.4727	0.03025	3.813e-56	4.516e-53	Up
Rps4x	Medulla	1	2384	-0.1054	0.03607	0.001165	0.04526	Down	0.2153	0.03623	3.879e-10	6.305e-08	Up	0.3358	0.03543	3.156e-22	6.015e-20	Up
Rps5	Medulla	1	2379	-0.1998	0.0373	1.107e-08	1.359e-06	Down	0.2872	0.03635	2.589e-16	8.418e-14	Up	0.5006	0.03583	1.837e-45	1.172e-42	Up
Rps6	Medulla	1	2644	-0.2251	0.03769	2.589e-10	4.05e-08	Down	0.2756	0.03682	7.094e-15	2.1e-12	Up	0.5141	0.03637	1.81e-46	1.201e-43	Up
Rps7	Medulla	1	3414	-0.1465	0.03214	1.1e-06	9.914e-05	Down	0.1827	0.03186	1.683e-09	2.492e-07	Up	0.3411	0.03135	1.711e-28	4.432e-26	Up
Rps8	Medulla	1	4759	-0.1906	0.03083	8.851e-11	1.482e-08	Down	0.2273	0.03042	1.028e-14	2.889e-12	Up	0.4279	0.03007	5.616e-47	3.88e-44	Up
Rps9	Medulla	1	2574	-0.2589	0.03829	1.301e-12	2.664e-10	Down	0.2067	0.0376	5.386e-09	7.504e-07	Up	0.4799	0.03718	3.411e-39	1.664e-36	Up
Rpsa	Medulla	1	3528	-0.0683	0.03127	0.01712	0.327	None	0.3089	0.03197	3.885e-23	2.302e-20	Up	0.387	0.03133	4.857e-36	1.79e-33	Up
Rsl24d1	Medulla	1	187	-0.01449	0.06823	0.684	0.9982	None	0.2434	0.1464	0.005692	0.1318	None	0.3268	0.1316	0.001142	0.02194	Up
Rsrp1	Medulla	1	782.9	0.09642	0.05767	0.03092	0.4695	None	-0.09898	0.05959	0.0339	0.4198	None	-0.2377	0.05995	1.364e-05	0.0004692	Down
Rtkn2	Medulla	0	14.5	0.0267	0.0843	0.05519	0.6245	None	1.101	0.5557	0.001454	0.04441	Up	0.05065	0.129	0.1539	0.6106	None
Rtl8a	Medulla	1	2105	0.02483	0.03487	0.4258	0.9973	None	0.3692	0.03818	3.077e-23	1.962e-20	Up	0.3394	0.03697	5.143e-21	8.883e-19	Up
Rtl8b	Medulla	1	927.5	-0.07217	0.05269	0.08315	0.736	None	0.4083	0.05588	1.86e-14	4.896e-12	Up	0.5095	0.05441	5.85e-22	1.102e-19	Up
Rtn3	Medulla	1	3842	-0.05614	0.03288	0.07033	0.6923	None	0.07299	0.03353	0.01893	0.3006	None	0.136	0.03381	2.586e-05	0.0008375	Up
Rtn4r	Medulla	0	30.88	0.771	0.3545	0.0009504	0.03834	Up	0.04717	0.1004	0.0523	0.526	None	-0.06909	0.1337	0.1614	0.6205	None
Rtraf	Medulla	1	619.9	0.005389	0.05089	0.8688	0.9982	None	0.221	0.06905	0.0001484	0.006749	Up	0.217	0.06525	0.0001833	0.004662	Up
Rwdd1	Medulla	1	293.7	-0.3186	0.1075	0.0001826	0.009672	Down	0.06755	0.07898	0.1632	0.8143	None	0.4735	0.1009	1.978e-07	1.003e-05	Up
S100a1	Medulla	1	1046	-0.1791	0.05398	0.0001246	0.006958	Down	0.1966	0.05283	2.744e-05	0.001574	Up	0.4068	0.05156	2.849e-16	3.398e-14	Up
S100a16	Medulla	1	615.9	-0.1916	0.06944	0.0006629	0.02857	Down	0.05016	0.05633	0.2535	0.8969	None	0.2784	0.06647	4.011e-06	0.0001546	Up
S100b	Medulla	1	2453	0.1996	0.0361	3.362e-09	4.495e-07	Up	0.0985	0.03604	0.00265	0.07215	None	-0.09514	0.03442	0.003794	0.05734	None
S1pr5	Medulla	0	148.7	-0.06935	0.09438	0.1154	0.8039	None	-0.3363	0.1508	0.001261	0.0396	Down	-0.1291	0.1205	0.08325	0.4597	None
Samd10	Medulla	1	109.6	-0.3276	0.207	0.003905	0.1166	None	0.0106	0.07525	0.7556	0.9815	None	0.4175	0.1813	0.001251	0.02363	Up
Sap18	Medulla	0	222.6	-0.2111	0.1281	0.006483	0.1697	None	0.01119	0.06739	0.7858	0.9815	None	0.2682	0.1162	0.002477	0.04078	Up
Sap30l	Medulla	1	148.8	-0.4515	0.1446	8.239e-05	0.00481	Down	-0.3073	0.1553	0.002351	0.06594	None	0.05265	0.09728	0.3979	0.8381	None
Sbk1	Medulla	1	147.7	0.241	0.1717	0.007281	0.1837	None	-0.0297	0.07801	0.4352	0.9599	None	-0.4047	0.1494	0.0004611	0.01029	Down
Scand1	Medulla	1	534	-0.305	0.07414	2.753e-06	0.0002227	Down	0.08148	0.06454	0.08678	0.6493	None	0.4346	0.07115	8.59e-11	6.564e-09	Up
Scg2	Medulla	1	1182	0.2475	0.08171	0.0001966	0.01035	Up	0.1602	0.08156	0.007302	0.1573	None	-0.05721	0.06714	0.3033	0.7731	None
Scg5	Medulla	1	1444	0.06488	0.0432	0.07826	0.7275	None	0.1497	0.04685	0.0002901	0.01212	Up	0.07782	0.04318	0.05242	0.3513	None
Scn1b	Medulla	1	1885	-0.2898	0.0464	2.981e-11	5.314e-09	Down	-0.1467	0.04641	0.0003009	0.01247	Down	0.1258	0.04521	0.002649	0.04306	Up
Scn2b	Medulla	1	325	0.1584	0.09533	0.0112	0.2512	None	-0.04519	0.06914	0.3114	0.9257	None	-0.2772	0.09146	0.0003196	0.007431	Down
Scn3a	Medulla	0	85.5	0.04472	0.08735	0.1715	0.8988	None	-0.07704	0.1216	0.06039	0.566	None	-0.4826	0.2076	0.001017	0.02001	Down
Scn4b	Medulla	0	387.2	-0.04341	0.06518	0.3037	0.9774	None	-0.2389	0.09661	0.001109	0.03599	Down	-0.157	0.0874	0.02129	0.2007	None
Scp2	Medulla	0	796.3	-0.04975	0.05608	0.2305	0.949	None	0.08837	0.06268	0.06195	0.5721	None	0.1778	0.06535	0.001829	0.03185	Up
Scrib	Medulla	0	92.58	0.1017	0.1514	0.03695	0.52	None	-0.03663	0.08511	0.3066	0.9239	None	-0.4145	0.1897	0.001656	0.02936	Down
Scrt1	Medulla	1	500.4	-0.3637	0.07916	2.729e-07	2.646e-05	Down	-0.01377	0.05666	0.7458	0.9815	None	0.3416	0.07788	1.222e-06	5.248e-05	Up
Sdf2l1	Medulla	1	96.73	0.05972	0.09992	0.09342	0.7613	None	0.843	0.1832	2.018e-07	2.117e-05	Up	0.5162	0.1787	0.0002112	0.005241	Up
Sdhaf3	Medulla	1	166.6	-0.1921	0.16	0.0127	0.271	None	0.1751	0.1453	0.01757	0.2879	None	0.5707	0.1304	7.41e-07	3.348e-05	Up
Sdhaf4	Medulla	1	321.2	-0.2379	0.09947	0.001223	0.04738	Down	0.07901	0.07838	0.1158	0.7254	None	0.4027	0.09217	1.06e-06	4.623e-05	Up
Sdhb	Medulla	1	1100	-0.07803	0.05119	0.05692	0.6308	None	0.1552	0.05464	0.000864	0.02942	Up	0.266	0.05332	9.591e-08	5.107e-06	Up
Sdhd	Medulla	1	530.3	0.0003811	0.05295	0.9924	0.9999	None	0.1944	0.0748	0.001126	0.03641	Up	0.204	0.07022	0.0008213	0.01685	Up
Sdr39u1	Medulla	1	379.7	0.06401	0.07235	0.1582	0.885	None	0.2499	0.0941	0.000609	0.02234	Up	0.1362	0.08203	0.03579	0.2786	None
Sec11c	Medulla	1	1152	-0.1644	0.05179	0.0002353	0.012	Down	0.2255	0.05074	1.057e-06	8.899e-05	Up	0.4194	0.04951	2.714e-18	3.847e-16	Up
Sec61g	Medulla	1	1003	-0.1659	0.05349	0.0002964	0.01476	Down	-0.3884	0.05485	9.852e-14	2.402e-11	Down	-0.1969	0.05388	6.534e-05	0.001894	Down
Selenof	Medulla	1	1128	-0.007741	0.0441	0.8236	0.9982	None	0.1975	0.05433	3.766e-05	0.002082	Up	0.2147	0.05216	8.539e-06	0.0003091	Up
Selenok	Medulla	1	1272	-0.06388	0.04521	0.08965	0.7525	None	0.2148	0.04894	1.428e-06	0.0001155	Up	0.3021	0.04745	2.634e-11	2.1e-09	Up
Selenom	Medulla	1	1847	-0.05379	0.03877	0.1111	0.7994	None	0.1419	0.04169	0.0001603	0.007163	Up	0.2123	0.04073	4.351e-08	2.413e-06	Up
Selenop	Medulla	1	2571	0.08535	0.03548	0.007458	0.1871	None	0.141	0.0367	3.133e-05	0.001761	Up	0.05112	0.03425	0.1186	0.5468	None
Selenow	Medulla	1	3807	-0.07666	0.02905	0.004442	0.1283	None	0.2022	0.02959	1.251e-12	2.728e-10	Up	0.2882	0.02896	3.699e-24	8.07e-22	Up
Sema7a	Medulla	1	239.2	-0.07432	0.08756	0.1118	0.8016	None	-0.4571	0.1179	5.615e-06	0.0003847	Down	-0.2736	0.1172	0.002242	0.03766	Down
Sept4	Medulla	1	1387	-0.1627	0.04827	0.000123	0.006889	Down	0.01833	0.04155	0.6158	0.9759	None	0.1923	0.04699	1.154e-05	0.0004029	Up
Serf2	Medulla	1	2321	-0.1853	0.03731	9.904e-08	1.039e-05	Down	-0.01278	0.03387	0.6704	0.9815	None	0.1727	0.03657	7.993e-07	3.572e-05	Up
Serp2	Medulla	1	785.5	-0.2639	0.06322	2.5e-06	0.0002073	Down	0.1452	0.06115	0.003539	0.09196	None	0.4488	0.0605	9.99e-15	1.055e-12	Up
Set	Medulla	1	506.4	-0.2875	0.07446	8.304e-06	0.0006174	Down	-0.07051	0.06373	0.1302	0.7541	None	0.1802	0.07188	0.003253	0.05102	None
Setd1b	Medulla	1	62.51	0.03914	0.08504	0.1953	0.9218	None	-0.1083	0.185	0.02092	0.3186	None	-0.6221	0.2243	0.000263	0.006358	Down
Sez6l	Medulla	1	230	0.06184	0.08257	0.1584	0.885	None	-0.1244	0.1187	0.04056	0.4588	None	-0.3342	0.1187	0.0004438	0.009983	Down
Sf1	Medulla	0	260.9	0.1341	0.1042	0.02571	0.4212	None	-0.02902	0.0684	0.4939	0.964	None	-0.2353	0.1015	0.003123	0.04927	Down
Sf3b5	Medulla	0	380.1	-0.03522	0.06273	0.3929	0.9952	None	0.1171	0.08562	0.03827	0.4463	None	0.2111	0.08605	0.002762	0.04468	Up
Sgk1	Medulla	0	1303	0.09613	0.05069	0.0233	0.3973	None	0.1416	0.05284	0.001525	0.04605	Up	0.04138	0.04715	0.3407	0.8021	None
Sgk3	Medulla	1	100.7	0.8449	0.173	5.075e-08	5.609e-06	Up	0.07342	0.1131	0.08232	0.6435	None	-0.5122	0.1711	0.0001517	0.003955	Down
Sh3bgrl3	Medulla	1	835.9	0.06174	0.05459	0.1402	0.8577	None	0.1902	0.06327	0.0003558	0.01453	Up	0.1098	0.05725	0.02968	0.2492	None
Sh3gl3	Medulla	1	132.8	-0.08321	0.1146	0.06834	0.6866	None	0.1922	0.1744	0.0155	0.263	None	0.5415	0.1481	1.522e-05	0.0005202	Up
Shank1	Medulla	0	151.8	0.06919	0.09489	0.1183	0.8134	None	-0.07374	0.1007	0.117	0.7254	None	-0.3354	0.142	0.001482	0.02689	Down
Shank2	Medulla	1	42.82	0.6491	0.2837	0.0007517	0.03163	Up	0.00654	0.0805	0.7844	0.9815	None	-0.5701	0.2802	0.00167	0.02946	Down
Shank3	Medulla	1	39.13	1.116	0.2748	2.278e-06	0.0001927	Up	-0.007795	0.08136	0.7259	0.9815	None	-1.23	0.2719	3.027e-07	1.459e-05	Down
Shc1	Medulla	0	36.98	0.02708	0.0814	0.2497	0.9588	None	-0.04991	0.1015	0.06424	0.5832	None	-0.5871	0.3214	0.002419	0.04003	Down
Shisal1	Medulla	1	72.67	0.02344	0.07646	0.429	0.9973	None	-0.2059	0.358	0.01329	0.235	None	-0.5052	0.2146	0.0008954	0.01804	Down
Shox2	Medulla	1	78.51	-0.02122	0.07637	0.454	0.9982	None	0.4981	0.2104	0.0006949	0.02505	Up	0.6809	0.1931	2.13e-05	0.0007021	Up
Skp1a	Medulla	1	1395	-0.05504	0.04205	0.1234	0.8269	None	0.1837	0.0459	9.906e-06	0.0006517	Up	0.2586	0.0445	1.069e-09	7.48e-08	Up
Slc10a4	Medulla	1	44.64	0.05868	0.1081	0.03073	0.4682	None	-0.0353	0.09096	0.1519	0.7923	None	-0.8116	0.3052	0.0003097	0.007242	Down
Slc15a2	Medulla	1	75.75	0.7677	0.2008	6.19e-06	0.0004841	Up	0.06103	0.1051	0.09623	0.6769	None	-0.3834	0.2072	0.003573	0.05461	None
Slc16a1	Medulla	1	202	-0.2428	0.1311	0.003707	0.1124	None	0.01166	0.06804	0.7758	0.9815	None	0.299	0.1198	0.001272	0.02394	Up
Slc17a7	Medulla	1	200.5	0.2985	0.1234	0.0008793	0.03645	Up	-0.236	0.1392	0.005562	0.13	None	-0.6689	0.1173	7.138e-10	5.079e-08	Down
Slc1a2	Medulla	1	2641	-0.04593	0.03695	0.1596	0.8861	None	-0.161	0.04091	1.637e-05	0.001013	Down	-0.1098	0.03925	0.00299	0.04794	Down
Slc1a3	Medulla	1	502.8	0.4921	0.07559	4.395e-12	8.473e-10	Up	0.04161	0.0616	0.3588	0.9504	None	-0.4202	0.07415	1.265e-09	8.811e-08	Down
Slc23a2	Medulla	0	212.3	0.01885	0.06669	0.5809	0.9982	None	-0.1862	0.1377	0.01352	0.2378	None	-0.2889	0.1238	0.002056	0.03508	Down
Slc24a2	Medulla	1	750.6	0.1842	0.0631	0.00044	0.02052	Up	0.03492	0.05232	0.4107	0.9566	None	-0.1412	0.05906	0.006758	0.08767	None
Slc24a3	Medulla	1	191.6	0.1016	0.115	0.05505	0.6245	None	-0.06202	0.08948	0.1676	0.8167	None	-0.3389	0.1311	0.0008312	0.01699	Down
Slc25a33	Medulla	1	449.9	-0.1199	0.08635	0.02955	0.4571	None	0.06899	0.07175	0.1543	0.795	None	0.2668	0.08576	0.00026	0.006293	Up
Slc25a36	Medulla	1	208.6	0.01943	0.06661	0.6079	0.9982	None	-0.2433	0.1364	0.004585	0.1128	None	-0.3316	0.123	0.000633	0.01339	Down
Slc25a39	Medulla	1	453.3	-0.06634	0.0692	0.1452	0.864	None	0.2172	0.08486	0.001083	0.03543	Up	0.3509	0.08068	1.385e-06	5.857e-05	Up
Slc25a4	Medulla	1	5025	-0.08885	0.02635	0.0003439	0.01658	None	0.1022	0.02644	4.743e-05	0.00257	Up	0.1991	0.0262	8.242e-15	8.76e-13	Up
Slc25a5	Medulla	1	1978	-0.132	0.03959	0.0002037	0.01062	Down	0.01547	0.03582	0.6329	0.9783	None	0.1557	0.03876	2.28e-05	0.0007443	Up
Slc2a1	Medulla	1	698.1	0.3009	0.0643	2.184e-07	2.181e-05	Up	0.1134	0.06385	0.02126	0.3217	None	-0.1536	0.06045	0.003937	0.05886	None
Slc32a1	Medulla	1	778.7	-0.1944	0.07097	0.0006728	0.0289	Down	-0.02478	0.05404	0.5525	0.9726	None	0.1629	0.06713	0.004835	0.06852	None
Slc38a2	Medulla	1	869.8	-0.03536	0.0514	0.3783	0.9946	None	0.2135	0.06398	9.835e-05	0.00481	Up	0.2761	0.06157	1.076e-06	4.673e-05	Up
Slc38a3	Medulla	0	253.2	-0.06474	0.07992	0.1519	0.8722	None	-0.2812	0.1153	0.0009512	0.03186	Down	-0.1397	0.09977	0.05124	0.3479	None
Slc47a1	Medulla	1	6.077	-0.01112	0.07965	0.08426	0.7407	None	1.155	1.514	0.005614	0.1305	None	3.429	1.016	8.566e-05	0.002395	Up
Slc48a1	Medulla	1	954.4	-0.009554	0.04522	0.7959	0.9982	None	0.1618	0.05623	0.0007128	0.02541	Up	0.1833	0.05375	0.000184	0.004673	Up
Slc6a11	Medulla	1	757.6	0.1668	0.06616	0.001618	0.0591	None	-0.005774	0.05175	0.8869	0.9926	None	-0.1858	0.06343	0.0008795	0.01778	Down
Slc6a17	Medulla	1	321.5	0.4762	0.09794	6.45e-08	7.036e-06	Up	-0.06846	0.08121	0.1575	0.8027	None	-0.6274	0.0968	5.815e-12	4.944e-10	Down
Slc7a5	Medulla	1	98.04	0.4576	0.1841	0.0005331	0.0243	Up	0.0544	0.09496	0.1613	0.812	None	-0.1804	0.1617	0.03728	0.2858	None
Slirp	Medulla	1	530.1	-0.1613	0.07425	0.004039	0.1194	None	-0.2066	0.0759	0.0007172	0.02541	Down	-0.0306	0.06221	0.5645	0.9102	None
Smco3	Medulla	1	75.56	-0.04401	0.08918	0.1424	0.8617	None	0.08208	0.1293	0.05096	0.5215	None	0.5573	0.2184	0.0005076	0.01122	Up
Smdt1	Medulla	1	2308	-0.2104	0.03862	6.218e-09	8.054e-07	Down	0.1426	0.0379	4.139e-05	0.00228	Up	0.3692	0.03757	9.267e-24	1.97e-21	Up
Smg1	Medulla	1	166.2	0.2763	0.1448	0.002891	0.09434	None	0.001385	0.07084	0.9721	0.9948	None	-0.2896	0.1329	0.00291	0.04671	Down
Smg5	Medulla	1	170.6	0.02529	0.06946	0.4992	0.9982	None	-0.292	0.1466	0.00245	0.06826	None	-0.405	0.1318	0.000156	0.004061	Down
Smim12	Medulla	1	565.9	-0.1228	0.07305	0.0185	0.3429	None	0.2008	0.07384	0.0007467	0.02629	Up	0.3858	0.07096	5.187e-09	3.257e-07	Up
Smim8	Medulla	0	172.3	-0.1402	0.1396	0.02667	0.428	None	0.03859	0.07643	0.3616	0.9504	None	0.3122	0.1297	0.001492	0.02702	Up
Snca	Medulla	1	482.2	0.2835	0.08613	6.419e-05	0.003885	Up	0.2056	0.08856	0.001942	0.05628	None	-0.04898	0.06823	0.3857	0.8342	None
Sncg	Medulla	1	1263	0.3298	0.1013	6.791e-05	0.004045	Up	0.3667	0.1006	1.637e-05	0.001013	Up	0.02054	0.07445	0.7309	0.9507	None
Snf8	Medulla	1	473.5	-0.09961	0.0744	0.04724	0.5866	None	0.1619	0.07893	0.005995	0.1363	None	0.333	0.07621	1.363e-06	5.779e-05	Up
Snhg11	Medulla	1	2012	0.1789	0.04019	1.297e-06	0.000115	Up	-0.4784	0.04247	1.272e-30	1.171e-27	Down	-0.6722	0.04104	1.863e-61	3.861e-58	Down
Snhg8	Medulla	1	358.1	-0.1025	0.08113	0.04818	0.5904	None	-0.3356	0.0907	1.43e-05	0.0009018	Down	-0.168	0.08531	0.01347	0.1457	None
Snrnp25	Medulla	0	164	-0.07636	0.09953	0.09535	0.7641	None	0.06222	0.08879	0.1744	0.8282	None	0.3058	0.1336	0.002057	0.03508	Up
Snrnp27	Medulla	1	252.4	-0.03174	0.06801	0.4236	0.9973	None	0.2285	0.1155	0.003667	0.09425	None	0.3382	0.1067	0.000145	0.003817	Up
Snrnp70	Medulla	1	242.7	0.02751	0.06656	0.4834	0.9982	None	-0.3736	0.1195	9.889e-05	0.004823	Down	-0.4624	0.1125	2.828e-06	0.000113	Down
Snrpd1	Medulla	1	410.9	0.0247	0.05911	0.5577	0.9982	None	0.2448	0.08739	0.0004386	0.01707	Up	0.2043	0.08101	0.002458	0.0405	Up
Snrpf	Medulla	1	440.5	-0.07526	0.06923	0.1055	0.7897	None	-0.2346	0.0845	0.0005084	0.01933	Down	-0.118	0.07489	0.05266	0.3524	None
Snrpg	Medulla	1	455.6	-0.07456	0.06935	0.1077	0.7914	None	-0.3195	0.08429	1.067e-05	0.0006881	Down	-0.193	0.08054	0.003802	0.05734	None
Snrpn	Medulla	1	3541	-0.008816	0.0308	0.7576	0.9982	None	0.2806	0.03351	5.534e-18	1.995e-15	Up	0.2921	0.03273	6.686e-20	1.108e-17	Up
Snx3	Medulla	1	1021	-0.006969	0.04449	0.8475	0.9982	None	0.169	0.05506	0.00036	0.01467	Up	0.1861	0.05264	0.0001139	0.003065	Up
Son	Medulla	1	476	0.1519	0.07713	0.006808	0.1747	None	-0.06309	0.06575	0.1732	0.8271	None	-0.2751	0.07533	3.663e-05	0.001136	Down
Sostdc1	Medulla	1	37.25	-0.06478	0.1158	0.02291	0.3931	None	-0.9043	0.3058	0.0001189	0.005537	Down	-0.08997	0.1524	0.08817	0.474	None
Sox2	Medulla	0	86.42	-0.09125	0.1354	0.04353	0.5612	None	-0.4351	0.2028	0.001221	0.03856	Down	-0.08342	0.1223	0.1936	0.6633	None
Sox2ot	Medulla	1	187.8	-0.1699	0.1426	0.01639	0.3192	None	0.02897	0.07269	0.4112	0.9566	None	0.3182	0.1266	0.001089	0.02118	Up
Sox9	Medulla	1	65.74	-0.8907	0.2146	1.448e-06	0.0001264	Down	-0.6407	0.2248	0.0001671	0.007407	Down	0.05472	0.117	0.3165	0.7851	None
Spag7	Medulla	1	248.9	-0.107	0.1075	0.04826	0.5909	None	0.06475	0.08315	0.1661	0.8162	None	0.3098	0.1131	0.0006437	0.01358	Up
Sparc	Medulla	1	3108	0.3192	0.03708	5.64e-19	2.834e-16	Up	-0.05516	0.036	0.08975	0.659	None	-0.3856	0.03683	1.308e-26	3.053e-24	Down
Sparcl1	Medulla	1	7771	-0.1276	0.02485	7.817e-08	8.361e-06	Down	-0.06562	0.02452	0.004989	0.1201	None	0.06073	0.02438	0.01083	0.1235	None
Spcs1	Medulla	1	984.2	-0.01366	0.0444	0.6991	0.9982	None	0.187	0.05447	8.78e-05	0.004425	Up	0.213	0.05216	9.578e-06	0.0003437	Up
Spcs2	Medulla	1	468.3	-0.03103	0.05772	0.438	0.9977	None	0.1632	0.07932	0.005752	0.1326	None	0.238	0.07568	0.0002863	0.00684	Up
Spock2	Medulla	1	886.9	0.1321	0.05821	0.004806	0.1355	None	-0.01886	0.04882	0.6397	0.9802	None	-0.1697	0.05675	0.0008833	0.01784	Down
Sptan1	Medulla	1	1224	-0.04573	0.04295	0.2061	0.9313	None	-0.185	0.0499	3.177e-05	0.001779	Down	-0.1301	0.04729	0.002774	0.04481	Down
Sptb	Medulla	1	239.2	0.1096	0.1061	0.04704	0.5866	None	-0.09621	0.1016	0.07512	0.6221	None	-0.3593	0.1135	0.0001337	0.003541	Down
Sptbn2	Medulla	1	320.2	0.1078	0.08741	0.04435	0.5656	None	-0.18	0.1012	0.008073	0.1689	None	-0.3908	0.09259	2.164e-06	8.837e-05	Down
Sqle	Medulla	0	283.2	0.07821	0.08496	0.1074	0.7912	None	-0.0712	0.08367	0.1451	0.7786	None	-0.2559	0.1039	0.001845	0.03209	Down
Sqstm1	Medulla	1	1351	0.09321	0.04549	0.01538	0.3039	None	0.2078	0.04756	1.642e-06	0.0001296	Up	0.1009	0.04388	0.01324	0.144	None
Srp14	Medulla	1	1105	-0.03779	0.04482	0.2946	0.977	None	0.1631	0.05198	0.0003297	0.01357	Up	0.2224	0.05025	2.048e-06	8.425e-05	Up
Srp19	Medulla	1	480.9	-0.1844	0.08226	0.002672	0.08808	None	0.09434	0.0721	0.06433	0.5834	None	0.346	0.07744	8.243e-07	3.664e-05	Up
Srp54a	Medulla	1	80.94	-0.009983	0.0726	0.7341	0.9982	None	-0.5486	0.2135	0.000394	0.0156	Down	-0.4843	0.2092	0.001005	0.01981	Down
Srp9	Medulla	1	786.5	-0.02433	0.04966	0.5296	0.9982	None	0.2248	0.06304	4.156e-05	0.002282	Up	0.2697	0.06046	1.254e-06	5.375e-05	Up
Srrm2	Medulla	1	280.8	-0.004384	0.06089	0.9114	0.9995	None	-0.4195	0.1066	4.737e-06	0.0003286	Down	-0.4131	0.1029	4.772e-06	0.0001823	Down
Srsf2	Medulla	1	422.1	-0.02825	0.05879	0.4861	0.9982	None	-0.3936	0.0872	3.976e-07	3.746e-05	Down	-0.3385	0.08498	7.058e-06	0.0002618	Down
Srsf5	Medulla	1	576.1	0.106	0.06644	0.02933	0.4562	None	-0.4598	0.07366	2.637e-11	4.913e-09	Down	-0.6123	0.0705	2.548e-19	3.876e-17	Down
Srsf6	Medulla	0	310.3	0.06455	0.07461	0.1567	0.882	None	-0.09148	0.08689	0.08283	0.6435	None	-0.2488	0.09539	0.001345	0.02502	Down
Ss18l2	Medulla	1	634.5	-0.2078	0.06679	0.0001944	0.01027	Down	-0.1145	0.06432	0.02057	0.3161	None	0.07113	0.05937	0.1679	0.6289	None
Ssr4	Medulla	1	505.1	-0.02547	0.05572	0.5246	0.9982	None	0.1385	0.07542	0.01282	0.2295	None	0.1999	0.07271	0.001354	0.02509	Up
Stac	Medulla	1	35.84	0.06986	0.1244	0.01643	0.3192	None	-0.04707	0.0999	0.05981	0.5625	None	-1.064	0.3018	1.928e-05	0.0006407	Down
Stard10	Medulla	0	307	-0.2572	0.1054	0.0009683	0.03897	Down	-0.1218	0.09799	0.03841	0.4465	None	0.07508	0.08309	0.2289	0.7067	None
Stard3nl	Medulla	1	393.2	0.0271	0.06013	0.5041	0.9982	None	0.2872	0.08836	9.728e-05	0.004786	Up	0.2335	0.08293	0.000833	0.01701	Up
Stip1	Medulla	0	680.4	-0.02061	0.05052	0.6023	0.9982	None	0.1283	0.06443	0.01093	0.2063	None	0.1727	0.06229	0.001663	0.02942	Up
Stmn1	Medulla	1	2774	0.05308	0.03383	0.08189	0.7334	None	0.1744	0.03613	2.508e-07	2.52e-05	Up	0.1158	0.03446	0.0004333	0.00976	Up
Stmn2	Medulla	1	2328	0.0813	0.0363	0.01218	0.2659	None	0.1795	0.03782	3.544e-07	3.416e-05	Up	0.09087	0.03553	0.007199	0.09186	None
Stmn3	Medulla	1	4722	-0.01056	0.02577	0.6573	0.9982	None	0.1739	0.02743	4.215e-11	7.679e-09	Up	0.1877	0.02671	6.337e-13	5.87e-11	Up
Sub1	Medulla	1	758.1	0.05792	0.05403	0.162	0.8913	None	0.194	0.06335	0.0002882	0.01207	Up	0.117	0.05746	0.02053	0.1964	None
Suclg1	Medulla	1	806.4	-0.1635	0.06231	0.001268	0.04888	Down	-0.009242	0.04915	0.8132	0.9855	None	0.1584	0.05945	0.002623	0.04268	Up
Suds3	Medulla	1	308.9	-0.2518	0.1018	0.0008986	0.03697	Down	-0.03955	0.06796	0.3723	0.9533	None	0.1756	0.09395	0.01493	0.1573	None
Sult4a1	Medulla	1	1088	0.09837	0.05269	0.01939	0.3533	None	0.2425	0.05516	1.152e-06	9.594e-05	Up	0.1214	0.05092	0.00854	0.1033	None
Sumo1	Medulla	1	643.8	-0.08689	0.06262	0.05827	0.6374	None	0.1224	0.06569	0.01543	0.2625	None	0.2607	0.06546	1.07e-05	0.0003775	Up
Sun1	Medulla	1	99.84	0.4708	0.1805	0.0003827	0.01823	Up	0.03571	0.08365	0.3221	0.9305	None	-0.2774	0.1768	0.009545	0.1121	None
Supt4a	Medulla	1	424.2	-0.02193	0.05856	0.5821	0.9982	None	0.1874	0.08687	0.003578	0.09271	None	0.2483	0.08193	0.0003824	0.008758	Up
Surf1	Medulla	1	448.8	-0.02185	0.05666	0.5786	0.9982	None	0.1566	0.0803	0.007841	0.1652	None	0.2152	0.07638	0.0009648	0.01925	Up
Sv2a	Medulla	1	1247	0.02114	0.04144	0.5578	0.9982	None	-0.1713	0.05046	0.0001156	0.005431	Down	-0.2053	0.0485	5.688e-06	0.0002134	Down
Svbp	Medulla	1	155	-0.1582	0.1615	0.02044	0.3675	None	0.09765	0.1144	0.06978	0.6058	None	0.4815	0.1362	2.65e-05	0.0008533	Up
Swi5	Medulla	1	1177	0.02461	0.04273	0.494	0.9982	None	0.2234	0.05059	1.195e-06	9.909e-05	Up	0.193	0.04823	1.682e-05	0.0005667	Up
Syp	Medulla	1	1329	0.1342	0.04917	0.001391	0.05302	None	0.1469	0.04984	0.000688	0.02485	Up	0.01031	0.04407	0.8025	0.9714	None
Sys1	Medulla	1	453.9	-0.03066	0.05901	0.455	0.9982	None	0.1474	0.08219	0.01221	0.224	None	0.2236	0.07904	0.0008665	0.01758	Up
Syt1	Medulla	1	642.9	0.3501	0.07601	2.645e-07	2.579e-05	Up	-0.03793	0.06027	0.3869	0.9547	None	-0.4227	0.07469	1.308e-09	9.074e-08	Down
Szt2	Medulla	0	72.87	0.06759	0.11	0.06472	0.669	None	-0.03966	0.089	0.2235	0.8738	None	-0.4528	0.2192	0.001935	0.03332	Down
Tac1	Medulla	1	246.2	0.7402	0.1234	1.019e-10	1.69e-08	Up	0.4147	0.1334	9.618e-05	0.00476	Up	-0.2208	0.1198	0.009796	0.1142	None
Tac2	Medulla	1	23.66	-0.0227	0.083	0.02798	0.4418	None	0.02751	0.08996	0.03276	0.4124	None	2.205	0.6321	1.904e-05	0.0006351	Up
Taf10	Medulla	1	512.5	-0.4929	0.07507	2.968e-12	5.789e-10	Down	0.06388	0.06211	0.166	0.8162	None	0.5957	0.07324	2.798e-17	3.542e-15	Up
Tagln3	Medulla	1	1579	0.08416	0.04557	0.03065	0.4679	None	0.2208	0.04811	4.91e-07	4.449e-05	Up	0.1239	0.04514	0.003019	0.04812	Up
Tbca	Medulla	1	1117	-0.1204	0.05127	0.004724	0.1341	None	0.08653	0.04895	0.03861	0.4474	None	0.2342	0.05046	6.527e-07	2.973e-05	Up
Tbcb	Medulla	1	593.3	-0.01504	0.05258	0.7004	0.9982	None	0.2593	0.07131	2.486e-05	0.001456	Up	0.293	0.06813	2.257e-06	9.195e-05	Up
Tecr	Medulla	1	1962	0.04125	0.03788	0.2135	0.9405	None	0.168	0.04198	1.17e-05	0.000749	Up	0.1211	0.03983	0.001228	0.02325	Up
Ten1	Medulla	0	225.8	-0.03262	0.07021	0.4016	0.9952	None	0.1287	0.116	0.03705	0.4385	None	0.2641	0.1163	0.002788	0.04492	Up
Tesc	Medulla	1	190	-0.4025	0.1355	0.0001423	0.007892	Down	0.01352	0.07006	0.732	0.9815	None	0.4577	0.1297	2.849e-05	0.0009102	Up
Them6	Medulla	1	218	-0.2589	0.1262	0.002302	0.07788	None	0.09721	0.09908	0.07695	0.6285	None	0.4896	0.1128	9.996e-07	4.396e-05	Up
Timm10b	Medulla	1	562.5	-0.1641	0.07764	0.004416	0.1278	None	0.0449	0.05978	0.3072	0.9239	None	0.2555	0.07417	8.949e-05	0.002485	Up
Timm13	Medulla	1	1061	-0.06701	0.05058	0.09817	0.7708	None	0.1652	0.05557	0.0005121	0.01943	Up	0.2636	0.05401	1.695e-07	8.729e-06	Up
Timm23	Medulla	1	560.4	-0.08942	0.0691	0.06289	0.6617	None	0.1914	0.07544	0.001369	0.04236	Up	0.3424	0.07239	2.416e-07	1.203e-05	Up
Timm8a1	Medulla	1	218.6	-0.004046	0.06427	0.9125	0.9995	None	0.2452	0.1225	0.003112	0.0823	None	0.277	0.1121	0.00157	0.02817	Up
Timm8b	Medulla	1	2108	-0.09291	0.03963	0.00762	0.1903	None	0.06755	0.03855	0.04889	0.5072	None	0.177	0.03968	2.558e-06	0.0001035	Up
Tle5	Medulla	1	2380	-0.4439	0.04096	1.455e-28	2.011e-25	Down	-0.09268	0.03963	0.0086	0.1754	None	0.337	0.04096	2.246e-17	2.867e-15	Up
Tm2d1	Medulla	1	339.7	-0.1329	0.09543	0.02331	0.3973	None	0.1324	0.09165	0.02582	0.3627	None	0.3697	0.09117	4.634e-06	0.0001774	Up
Tma16	Medulla	1	52.15	0.03938	0.08796	0.1325	0.8438	None	0.8474	0.2497	2.945e-05	0.001672	Up	0.423	0.2615	0.004529	0.06547	None
Tma7	Medulla	1	1655	-0.05783	0.0394	0.08836	0.7509	None	0.07499	0.04047	0.0355	0.4306	None	0.1496	0.04099	0.000105	0.002862	Up
Tmed3	Medulla	0	175.3	-0.01955	0.06927	0.586	0.9982	None	0.197	0.148	0.0125	0.226	None	0.3087	0.1321	0.001802	0.03142	Up
Tmeff2	Medulla	1	359.2	-0.05254	0.06772	0.2318	0.949	None	0.1265	0.08696	0.02986	0.3932	None	0.2507	0.08653	0.0005714	0.01237	Up
Tmem100	Medulla	1	56.23	-0.009332	0.07494	0.7063	0.9982	None	0.3082	0.348	0.008319	0.1718	None	0.4922	0.2428	0.001896	0.03279	Up
Tmem130	Medulla	1	747.9	0.2207	0.06444	6.157e-05	0.003753	Up	0.1223	0.06364	0.01371	0.2393	None	-0.07573	0.05661	0.1277	0.5627	None
Tmem132a	Medulla	1	203.8	0.04766	0.07588	0.2454	0.9557	None	-0.2615	0.1354	0.003153	0.08325	None	-0.4287	0.1207	2.823e-05	0.0009035	Down
Tmem134	Medulla	0	201.3	-0.08579	0.1013	0.07964	0.7288	None	0.06226	0.08546	0.1809	0.8321	None	0.2949	0.1228	0.001667	0.02946	Up
Tmem147	Medulla	1	906.7	-0.0623	0.05153	0.1259	0.8323	None	0.2179	0.05765	1.843e-05	0.001115	Up	0.3118	0.05565	2.71e-09	1.797e-07	Up
Tmem151a	Medulla	1	687.8	0.05313	0.05467	0.2055	0.9305	None	0.2226	0.06552	7.374e-05	0.003797	Up	0.149	0.06038	0.005061	0.07093	None
Tmem160	Medulla	1	462.4	-0.4101	0.08026	1.928e-08	2.251e-06	Down	0.2017	0.07865	0.001161	0.03723	Up	0.6641	0.07649	2.48e-19	3.807e-17	Up
Tmem167	Medulla	1	401.7	0.03087	0.06152	0.4422	0.9982	None	0.2342	0.09169	0.0009063	0.0306	Up	0.178	0.08349	0.008407	0.1025	None
Tmem176b	Medulla	0	162.4	-0.07881	0.1036	0.08593	0.7433	None	0.06168	0.08993	0.1701	0.8213	None	0.3243	0.139	0.001676	0.02952	Up
Tmem192	Medulla	1	149	-0.0483	0.08223	0.2162	0.9427	None	0.1277	0.1374	0.03828	0.4463	None	0.3634	0.1398	0.0007178	0.01488	Up
Tmem203	Medulla	0	40.62	-0.04841	0.0971	0.04973	0.5984	None	0.03184	0.08791	0.2298	0.8783	None	0.6421	0.3078	0.001376	0.0253	Up
Tmem204	Medulla	1	44.66	0.7487	0.2783	0.0002669	0.01333	Up	0.04437	0.09601	0.1093	0.7134	None	-0.1655	0.2293	0.03664	0.2821	None
Tmem229a	Medulla	1	531	-0.2527	0.07456	5.707e-05	0.003531	Down	0.03074	0.05607	0.4696	0.9626	None	0.3128	0.07171	1.544e-06	6.498e-05	Up
Tmem238	Medulla	1	35.21	-0.06683	0.1223	0.009363	0.2211	None	0.03296	0.08926	0.1879	0.841	None	0.9837	0.3174	8.219e-05	0.002318	Up
Tmem242	Medulla	1	400.1	-0.04336	0.06491	0.3044	0.9774	None	0.2532	0.09062	0.0004175	0.01633	Up	0.3573	0.0859	3.111e-06	0.0001231	Up
Tmem256	Medulla	1	721.6	-0.2685	0.06469	2.729e-06	0.0002218	Down	-0.2947	0.06573	5.998e-07	5.29e-05	Down	-0.01866	0.05643	0.6934	0.9466	None
Tmem258	Medulla	1	561.7	-0.05818	0.05896	0.1732	0.9	None	-0.2326	0.07368	0.0001566	0.007018	Down	-0.1459	0.06827	0.01213	0.1347	None
Tmem267	Medulla	1	47.33	0.05078	0.0983	0.05782	0.6361	None	1.128	0.2549	4.657e-07	4.31e-05	Up	0.5998	0.2493	0.0006968	0.0145	Up
Tmem59l	Medulla	1	1003	-0.02465	0.04597	0.5117	0.9982	None	0.1174	0.05477	0.009275	0.1848	None	0.1601	0.05347	0.0008619	0.01751	Up
Tmem91	Medulla	1	187.5	0.1034	0.1213	0.05135	0.606	None	0.3842	0.1396	0.0003061	0.01265	Up	0.128	0.1119	0.08077	0.4521	None
Tmsb10	Medulla	1	2756	0.08366	0.033	0.005677	0.1533	None	-0.09812	0.03421	0.001681	0.05003	None	-0.1947	0.03363	1.99e-09	1.352e-07	Down
Tmsb4x	Medulla	1	9428	0.009779	0.02436	0.6563	0.9982	None	0.2324	0.02573	3.103e-20	1.354e-17	Up	0.2197	0.0253	6.263e-19	9.271e-17	Up
Tomm20	Medulla	1	1247	-0.05935	0.04652	0.1244	0.8302	None	0.1499	0.05116	0.0007008	0.02513	Up	0.2344	0.04989	5.066e-07	2.353e-05	Up
Tomm22	Medulla	1	567.3	0.0319	0.05539	0.4312	0.9973	None	0.2	0.07431	0.0008463	0.02899	Up	0.1532	0.06806	0.00835	0.1021	None
Tomm5	Medulla	1	969.8	-0.1202	0.05486	0.006999	0.1785	None	0.1588	0.055	0.0007162	0.02541	Up	0.3151	0.05372	5.696e-10	4.124e-08	Up
Tomm6	Medulla	1	1710	-0.09618	0.04085	0.007029	0.179	None	0.05732	0.03908	0.09786	0.6828	None	0.1701	0.04072	9.92e-06	0.0003545	Up
Tomm7	Medulla	1	1319	-0.112	0.04889	0.006298	0.1657	None	-0.325	0.05122	1.768e-11	3.448e-09	Down	-0.1908	0.05002	3.717e-05	0.001148	Down
Tpbgl	Medulla	1	59.08	-0.07311	0.1206	0.0401	0.5406	None	-0.6261	0.2429	0.0003686	0.01494	Down	-0.1024	0.1492	0.1072	0.5216	None
Tpgs1	Medulla	1	291.2	-0.06172	0.07875	0.1659	0.8917	None	0.1322	0.1045	0.0312	0.4039	None	0.3098	0.104	0.0003077	0.007242	Up
Tpi1	Medulla	1	3333	0.004886	0.02897	0.862	0.9982	None	0.1465	0.03145	7.749e-07	6.657e-05	Up	0.1437	0.03043	1.026e-06	4.502e-05	Up
Tppp3	Medulla	1	1128	0.27	0.05652	1.529e-07	1.565e-05	Up	0.1843	0.05765	0.0002043	0.008867	Up	-0.06885	0.05067	0.1323	0.5726	None
Tpt1	Medulla	1	5975	-0.2773	0.02626	3.476e-27	3.39e-24	Down	0.2726	0.02572	5.319e-27	4.2e-24	Up	0.5549	0.02558	1.395e-105	2.314e-101	Up
Trappc2l	Medulla	1	569.2	-0.05009	0.06056	0.2414	0.9538	None	0.1586	0.0763	0.006175	0.1391	None	0.2592	0.0736	6.582e-05	0.001905	Up
Trappc4	Medulla	1	448.9	0.01099	0.05559	0.7814	0.9982	None	0.2074	0.08168	0.001174	0.03745	Up	0.1966	0.0758	0.002183	0.03682	Up
Trappc6b	Medulla	1	506.9	-0.04168	0.05961	0.3222	0.9819	None	0.1319	0.07678	0.01739	0.2857	None	0.2232	0.07525	0.0005748	0.01243	Up
Trir	Medulla	1	512.1	-0.005059	0.05384	0.8971	0.9992	None	0.1984	0.07709	0.001199	0.03807	Up	0.2181	0.07255	0.0005289	0.01161	Up
Trmt112	Medulla	1	511	0.02979	0.05675	0.4811	0.9982	None	0.2505	0.07799	0.0001173	0.005496	Up	0.2038	0.07295	0.001141	0.02194	Up
Trnp1	Medulla	1	891.9	-0.4079	0.05603	2.15e-14	5.4e-12	Down	-0.4171	0.05713	1.916e-14	4.964e-12	Down	-0.007587	0.05132	0.8695	0.9819	None
Trp53i11	Medulla	0	111.3	0.05844	0.09518	0.1206	0.8157	None	0.4071	0.1843	0.001142	0.03685	Up	0.1377	0.1393	0.0738	0.4299	None
Trpc3	Medulla	1	81.52	0.04911	0.09084	0.1403	0.8577	None	-0.3529	0.2683	0.005429	0.128	None	-0.7267	0.2032	1.723e-05	0.0005784	Down
Trpm3	Medulla	0	275.5	-0.05577	0.07438	0.2019	0.9259	None	-0.257	0.1115	0.001496	0.04536	Down	-0.1394	0.09652	0.04852	0.3372	None
Tsc22d3	Medulla	1	1047	0.1366	0.05621	0.003049	0.09826	None	0.2478	0.05695	1.375e-06	0.0001125	Up	0.09062	0.05127	0.05003	0.3432	None
Tsc22d4	Medulla	1	1279	-0.1674	0.05071	0.0001487	0.008135	Down	0.1011	0.04836	0.01369	0.2393	None	0.2968	0.04915	2.144e-10	1.587e-08	Up
Tspyl4	Medulla	1	1607	0.121	0.04526	0.001983	0.06893	None	-0.01623	0.0407	0.6614	0.9815	None	-0.1476	0.04444	0.0003628	0.008366	Down
Tst	Medulla	1	188.8	-0.3809	0.1297	0.0001657	0.008893	Down	0.05494	0.08142	0.2286	0.8781	None	0.5421	0.1212	4.822e-07	2.252e-05	Up
Tstd3	Medulla	0	126.7	-0.08939	0.1264	0.05243	0.6116	None	0.04886	0.08791	0.2234	0.8738	None	0.3861	0.1672	0.001362	0.02513	Up
Ttc9b	Medulla	1	307.7	-0.02919	0.06482	0.4639	0.9982	None	0.2259	0.1043	0.002505	0.06915	None	0.3174	0.09737	0.0001185	0.003158	Up
Ttr	Medulla	1	19750	-0.3986	0.1843	0.001162	0.04526	Down	-1.028	0.163	1.461e-11	2.884e-09	Down	-0.4607	0.1739	0.0004571	0.01023	Down
Tuba1b	Medulla	1	3913	-0.05873	0.02809	0.02453	0.4067	None	0.1741	0.02904	3.75e-10	6.156e-08	Up	0.2413	0.02838	3.819e-18	5.366e-16	Up
Tuba4a	Medulla	1	1654	-0.04302	0.03907	0.1962	0.9219	None	0.09106	0.04185	0.0128	0.2295	None	0.1511	0.04168	0.0001143	0.003071	Up
Tubb2a	Medulla	1	1930	0.1106	0.04039	0.001938	0.06794	None	-0.004325	0.03714	0.8959	0.9926	None	-0.1217	0.03962	0.001114	0.02156	Down
Tubb4a	Medulla	1	1775	-0.02274	0.0375	0.4899	0.9982	None	0.1052	0.04175	0.004401	0.1089	None	0.139	0.0409	0.0002996	0.00711	Up
Txn2	Medulla	0	559.8	-0.07047	0.06274	0.1156	0.8039	None	0.07426	0.06323	0.1116	0.7172	None	0.1934	0.06918	0.001258	0.02373	Up
Txndc17	Medulla	1	444	0.04721	0.06505	0.2683	0.9713	None	0.3198	0.08792	1.789e-05	0.00109	Up	0.2294	0.08304	0.001003	0.01981	Up
Txnip	Medulla	0	88.37	0.05262	0.09135	0.1409	0.8588	None	-0.06634	0.1065	0.09975	0.6876	None	-0.4205	0.1905	0.001559	0.02803	Down
Txnl4a	Medulla	0	317.1	-0.08772	0.08582	0.07832	0.7275	None	0.06674	0.07663	0.1672	0.8165	None	0.2483	0.09574	0.001391	0.02548	Up
Uba52	Medulla	1	1079	0.2065	0.05274	1.047e-05	0.0007614	Up	0.01786	0.04525	0.6437	0.9812	None	-0.1866	0.05093	6.943e-05	0.002002	Down
Ubb	Medulla	1	6991	0.004795	0.02349	0.8308	0.9982	None	0.1142	0.02471	1.385e-06	0.0001125	Up	0.1109	0.02414	2.6e-06	0.0001049	Up
Ube2d1	Medulla	0	258.5	-0.06445	0.07988	0.1526	0.8722	None	0.07292	0.0831	0.1399	0.7709	None	0.2394	0.1034	0.003034	0.04827	Up
Ube2e1	Medulla	0	529.4	-0.03233	0.0576	0.4278	0.9973	None	0.13	0.07648	0.01846	0.2965	None	0.2057	0.07481	0.001287	0.02411	Up
Ube2m	Medulla	1	950.9	-0.4862	0.05483	4.357e-20	2.58e-17	Down	-0.3628	0.0556	4.933e-12	1.049e-09	Down	0.104	0.05365	0.03032	0.2517	None
Ube2n	Medulla	0	761.2	-0.1126	0.06352	0.01897	0.3487	None	0.02759	0.05208	0.5052	0.9675	None	0.1679	0.06263	0.002297	0.03831	Up
Ube2s	Medulla	1	613.8	-0.02836	0.05439	0.4818	0.9982	None	0.3156	0.07114	6.952e-07	6.067e-05	Up	0.3708	0.0685	6.126e-09	3.818e-07	Up
Ube2v2	Medulla	1	663.5	-0.04159	0.05399	0.3005	0.9774	None	0.1938	0.06711	0.0004979	0.01898	Up	0.2718	0.06429	3.686e-06	0.0001441	Up
Ubl5	Medulla	1	2089	-0.09381	0.03858	0.005966	0.1586	None	-0.1563	0.04026	2.149e-05	0.001282	Down	-0.05639	0.03781	0.1152	0.5402	None
Uchl1	Medulla	1	6366	0.05301	0.02646	0.03281	0.4839	None	0.2539	0.02744	2.372e-21	1.123e-18	Up	0.1964	0.02678	6.294e-14	6.212e-12	Up
Uchl3	Medulla	1	210.2	-0.01331	0.06551	0.6676	0.9982	None	0.2693	0.1235	0.001983	0.05717	None	0.3366	0.1139	0.0002883	0.006877	Up
Uchl5	Medulla	1	389.7	-0.07435	0.07541	0.1148	0.8039	None	0.1586	0.09048	0.01117	0.2099	None	0.3193	0.08703	2.689e-05	0.0008641	Up
Ufc1	Medulla	1	605.9	-0.127	0.06764	0.0122	0.2659	None	0.1227	0.06586	0.01549	0.263	None	0.3026	0.06587	5.081e-07	2.353e-05	Up
Unc13c	Medulla	1	175.6	0.491	0.1282	6.488e-06	0.000505	Up	0.003083	0.07051	0.9359	0.9926	None	-0.4847	0.1253	7.382e-06	0.0002714	Down
Uqcc2	Medulla	1	2071	-0.1742	0.03783	6.699e-07	6.205e-05	Down	-0.02729	0.03465	0.3927	0.9556	None	0.1421	0.03691	3.528e-05	0.001102	Up
Uqcc3	Medulla	1	278.8	-0.09399	0.09158	0.06761	0.6848	None	0.151	0.1028	0.01804	0.2926	None	0.3672	0.09896	1.867e-05	0.0006241	Up
Uqcr10	Medulla	1	3203	-0.1995	0.03198	5.962e-11	1.03e-08	Down	-0.1442	0.0322	1.847e-06	0.0001418	Down	0.05118	0.03095	0.08641	0.4692	None
Uqcr11	Medulla	1	3051	-0.08782	0.03404	0.004418	0.1278	None	-0.1656	0.03548	5.942e-07	5.29e-05	Down	-0.07209	0.03385	0.02595	0.2298	None
Uqcrb	Medulla	1	2139	-0.1359	0.03698	5.541e-05	0.003467	Down	-0.01699	0.03395	0.584	0.9746	None	0.1202	0.03604	0.0004558	0.01023	Up
Uqcrfs1	Medulla	1	1126	-0.07343	0.04756	0.0603	0.6467	None	0.1379	0.0505	0.00157	0.04734	Up	0.2387	0.04944	2.653e-07	1.304e-05	Up
Uqcrh	Medulla	1	4666	-0.2944	0.02868	9.64e-26	8.412e-23	Down	0.06208	0.02753	0.0163	0.2718	None	0.3632	0.02829	1.106e-38	5.059e-36	Up
Uqcrq	Medulla	1	3848	-0.1476	0.03048	2.756e-07	2.656e-05	Down	-0.02753	0.02886	0.3042	0.9239	None	0.1192	0.02989	3.674e-05	0.001136	Up
Use1	Medulla	1	530.1	-0.07396	0.06644	0.1093	0.794	None	0.1929	0.07667	0.001431	0.04379	Up	0.3263	0.07339	9.902e-07	4.366e-05	Up
Usp54	Medulla	1	216.1	0.4228	0.1156	1.344e-05	0.0009604	Up	0.08104	0.09417	0.1108	0.7145	None	-0.231	0.1105	0.005426	0.07447	None
Uts2b	Medulla	1	33.43	2.067	0.9353	0.0006848	0.02919	Up	1.589	1.124	0.002602	0.07106	None	-0.007429	0.1181	0.6906	0.9466	None
Vamp1	Medulla	1	2729	-0.1308	0.03631	5.99e-05	0.003665	Down	0.06074	0.03459	0.05431	0.5374	None	0.2067	0.03574	1.87e-09	1.276e-07	Up
Vamp2	Medulla	1	1486	0.168	0.04412	2.279e-05	0.001549	Up	0.002801	0.03945	0.9091	0.9926	None	-0.1675	0.04286	3.167e-05	0.001004	Down
Vat1l	Medulla	1	356.7	0.05625	0.07015	0.2032	0.9288	None	-0.1322	0.09532	0.02758	0.3758	None	-0.2728	0.09289	0.0004071	0.009271	Down
Vdac3	Medulla	1	968.6	-0.03494	0.04647	0.3349	0.9853	None	0.1169	0.05399	0.008944	0.1809	None	0.177	0.05298	0.0002515	0.006123	Up
Vegfb	Medulla	1	674.1	-0.4521	0.06592	4.18e-13	8.773e-11	Down	-0.228	0.06723	7.262e-05	0.003786	Down	0.187	0.06607	0.001186	0.02263	Up
Vldlr	Medulla	1	108.9	0.02168	0.07279	0.5158	0.9982	None	-0.2661	0.207	0.007734	0.1633	None	-0.4268	0.1696	0.0007285	0.01504	Down
Vps28	Medulla	1	771.7	0.01238	0.04867	0.7463	0.9982	None	0.177	0.06334	0.0006991	0.02513	Up	0.1673	0.05954	0.00159	0.02843	Up
Vps29	Medulla	1	761.4	-0.0005428	0.04886	0.9868	0.9999	None	0.1959	0.06444	0.0002713	0.01145	Up	0.2064	0.0612	0.0001712	0.0044	Up
Vsnl1	Medulla	1	3817	0.002925	0.02911	0.9344	0.9995	None	0.1343	0.03157	5.843e-06	0.0003986	Up	0.1345	0.03066	5.531e-06	0.0002083	Up
Vti1b	Medulla	1	866.6	-0.09868	0.05715	0.02672	0.4281	None	0.2705	0.05872	3.75e-07	3.572e-05	Up	0.4064	0.05693	8.729e-14	8.564e-12	Up
Wbp2	Medulla	1	1565	0.04277	0.03933	0.2086	0.9357	None	0.1449	0.04375	0.0002122	0.009162	Up	0.09735	0.04101	0.01125	0.1271	None
Wdr83os	Medulla	1	389.9	-0.04549	0.0659	0.2845	0.973	None	0.2683	0.09116	0.0002425	0.01031	Up	0.377	0.08653	1.213e-06	5.226e-05	Up
Wfdc18	Medulla	1	26.69	-1.436	0.3699	4.868e-06	0.0003843	Down	0.003371	0.08104	0.8795	0.9926	None	1.492	0.364	2.125e-06	8.699e-05	Up
Wnt6	Medulla	0	6.08	-0.0203	0.08225	0.01681	0.3236	None	0.007748	0.08393	0.4794	0.964	None	1.737	0.9662	0.002549	0.04176	Up
Wsb1	Medulla	1	225.5	0.3076	0.1287	0.0009009	0.03697	Up	-0.02654	0.07261	0.5154	0.9691	None	-0.4073	0.1214	6.047e-05	0.001768	Down
Xbp1	Medulla	1	315	0.0707	0.082	0.129	0.8369	None	0.3848	0.1051	1.491e-05	0.0009361	Up	0.2275	0.09913	0.003512	0.05407	None
Ypel3	Medulla	1	1917	0.001351	0.03896	0.9436	0.9995	None	0.3233	0.0451	6.192e-14	1.556e-11	Up	0.3217	0.04393	3.05e-14	3.121e-12	Up
Ypel5	Medulla	0	681.9	-0.04663	0.05631	0.2615	0.9647	None	0.1041	0.0659	0.03358	0.4169	None	0.1936	0.06682	0.0009274	0.01859	Up
Ywhaq	Medulla	1	2521	-0.09507	0.03736	0.00382	0.1146	None	0.06057	0.03614	0.06573	0.5904	None	0.1705	0.0373	1.638e-06	6.877e-05	Up
Zcchc18	Medulla	1	1070	0.1603	0.05438	0.0005186	0.02375	Up	0.02682	0.04663	0.4954	0.964	None	-0.1311	0.05155	0.005012	0.0703	None
Zcrb1	Medulla	1	662.2	-0.1332	0.06634	0.00854	0.2061	None	0.1466	0.06545	0.004832	0.1169	None	0.3312	0.06415	2.804e-08	1.614e-06	Up
Zfp771	Medulla	1	278.9	-0.2613	0.1084	0.001039	0.04113	Down	0.0608	0.07617	0.2019	0.8535	None	0.4087	0.1004	3.834e-06	0.0001492	Up
Zic1	Medulla	1	258.8	-0.06904	0.08742	0.1284	0.8369	None	-0.5279	0.123	9.224e-07	7.843e-05	Down	-0.3413	0.1238	0.000494	0.01095	Down
Znhit1	Medulla	0	395.4	-0.07217	0.07199	0.1209	0.8173	None	0.08079	0.07376	0.1039	0.7009	None	0.2247	0.0827	0.001194	0.02273	Up
0610012G03Rik	Molecular_layer	1	344.3	-0.2252	0.1009	0.001216	0.1254	None	0.1772	0.09677	0.007281	0.2765	None	0.501	0.08962	1.553e-09	1.777e-07	Up
1110008P14Rik	Molecular_layer	1	507.8	0.02045	0.04763	0.4586	0.9984	None	0.4246	0.07895	4.654e-09	1.065e-06	Up	0.3702	0.07462	6.405e-08	5.665e-06	Up
1110017D15Rik	Molecular_layer	1	29.02	-0.0284	0.06602	0.003738	0.2852	None	0.02088	0.08349	0.3024	0.9963	None	1.139	0.3699	8.042e-05	0.003782	Up
1110032A03Rik	Molecular_layer	0	126	-0.01438	0.05421	0.4419	0.9984	None	0.1638	0.1869	0.02116	0.5305	None	0.3631	0.1584	0.001429	0.04586	Up
1110065P20Rik	Molecular_layer	1	238.8	-0.1848	0.1346	0.006533	0.41	None	0.1035	0.1011	0.06178	0.8454	None	0.4428	0.1082	3.009e-06	0.0002028	Up
1810037I17Rik	Molecular_layer	1	526.9	-0.05083	0.06179	0.1225	0.9984	None	0.1486	0.08204	0.01139	0.3625	None	0.2871	0.07832	2.962e-05	0.001584	Up
2300009A05Rik	Molecular_layer	1	212.4	-0.3298	0.127	0.0003746	0.04942	Down	0.07479	0.09103	0.1194	0.9764	None	0.538	0.1163	2.287e-07	1.884e-05	Up
6430548M08Rik	Molecular_layer	1	258.2	0.03128	0.05744	0.2356	0.9984	None	-0.1531	0.1196	0.02098	0.5288	None	-0.316	0.1094	0.0003592	0.01377	Down
AC149090.1	Molecular_layer	1	127.9	0.6168	0.1553	3.088e-06	0.001068	Up	0.03984	0.08338	0.2773	0.9963	None	-0.4259	0.1571	0.0004068	0.01544	Down
Abhd16a	Molecular_layer	1	348.7	-0.02908	0.05328	0.2919	0.9984	None	-0.3776	0.09783	6.809e-06	0.0008759	Down	-0.2858	0.09401	0.0002688	0.0107	Down
Ackr1	Molecular_layer	1	153.3	0.03639	0.06524	0.1281	0.9984	None	-0.2518	0.1726	0.006801	0.2666	None	-0.5119	0.1411	1.733e-05	0.0009919	Down
Acot13	Molecular_layer	1	294.2	-0.03386	0.05818	0.2259	0.9984	None	0.2554	0.1066	0.001175	0.07352	None	0.3955	0.09753	3.915e-06	0.0002593	Up
Actb	Molecular_layer	1	2140	0.001761	0.03274	0.9417	0.9984	None	-0.2244	0.04352	2.941e-08	5.795e-06	Down	-0.2292	0.04182	7.076e-09	7.432e-07	Down
Acyp1	Molecular_layer	1	263.1	-0.02558	0.05511	0.2987	0.9984	None	0.2674	0.1165	0.001387	0.08313	None	0.4019	0.1061	1.142e-05	0.0006787	Up
Adam22	Molecular_layer	1	228.7	0.06807	0.09645	0.04385	0.9984	None	-0.08352	0.09964	0.094	0.941	None	-0.365	0.1206	0.0001942	0.00806	Down
Adcy1	Molecular_layer	1	957.2	0.02671	0.04435	0.3723	0.9984	None	-0.1896	0.06602	0.0005214	0.03775	Down	-0.2528	0.06253	8.114e-06	0.0004972	Down
Ankrd13b	Molecular_layer	0	105.1	0.0009223	0.052	0.9601	0.9984	None	-0.3722	0.1992	0.002338	0.1238	None	-0.4068	0.1784	0.001313	0.04294	Down
Ano8	Molecular_layer	1	66.48	-1.095	0.1998	1.924e-09	1.426e-06	Down	-0.7949	0.2143	9.04e-06	0.001117	Down	0.06781	0.1212	0.2045	0.8839	None
Arhgef11	Molecular_layer	1	49.04	0.6195	0.2626	0.0005935	0.07274	None	0.003024	0.07838	0.9016	0.9963	None	-0.5868	0.2609	0.001017	0.03466	Down
Arpc5l	Molecular_layer	0	316.4	-0.01617	0.05045	0.5122	0.9984	None	0.1637	0.1082	0.01417	0.4224	None	0.2563	0.09992	0.001301	0.04271	Up
Asgr1	Molecular_layer	0	69.51	-0.02819	0.06356	0.07795	0.9984	None	0.04512	0.09117	0.1706	0.9963	None	0.4795	0.2224	0.001403	0.04525	Up
Atox1	Molecular_layer	1	580.4	-0.1728	0.07584	0.001524	0.1464	None	0.01874	0.05462	0.6497	0.9963	None	0.2225	0.07051	0.0002846	0.0113	Up
Atp1a1	Molecular_layer	1	1109	-0.1759	0.06214	0.0003529	0.04828	Down	-0.2539	0.06264	4.739e-06	0.0006223	Down	-0.05595	0.05457	0.2419	0.9128	None
Atp5c1	Molecular_layer	1	1001	-0.1034	0.06078	0.01204	0.58	None	0.04288	0.0509	0.2914	0.9963	None	0.1861	0.05789	0.0003228	0.01259	Up
Atp5d	Molecular_layer	1	1199	-0.1232	0.05627	0.003308	0.26	None	0.04024	0.04761	0.3077	0.9963	None	0.1941	0.05348	6.774e-05	0.003275	Up
Atp5e	Molecular_layer	1	2917	-0.1618	0.03819	2.454e-06	0.0009093	Down	-0.07865	0.03726	0.018	0.484	None	0.07778	0.03654	0.02422	0.377	None
Atp5f1	Molecular_layer	1	1299	-0.08768	0.05482	0.02068	0.7814	None	0.08012	0.05202	0.05717	0.833	None	0.211	0.05393	1.924e-05	0.001081	Up
Atp5g1	Molecular_layer	1	1366	-0.01274	0.03708	0.6469	0.9984	None	0.2459	0.05056	1.143e-07	2.063e-05	Up	0.27	0.04813	2.244e-09	2.513e-07	Up
Atp5g2	Molecular_layer	1	662	-0.05477	0.05689	0.1067	0.9984	None	0.2118	0.06956	0.0002528	0.02093	Up	0.3291	0.06548	5.318e-08	4.757e-06	Up
Atp5h	Molecular_layer	1	1849	-0.1072	0.04461	0.002576	0.2191	None	0.2533	0.04445	1.216e-09	3.053e-07	Up	0.3881	0.04278	1.138e-20	2.769e-18	Up
Atp5j	Molecular_layer	1	2107	-0.09	0.04327	0.007493	0.4455	None	0.1689	0.04397	2.105e-05	0.002307	Up	0.2856	0.04249	1.59e-12	2.475e-10	Up
Atp5j2	Molecular_layer	1	2409	-0.1798	0.04125	1.161e-06	0.0005164	Down	-0.02053	0.0371	0.5358	0.9963	None	0.1592	0.04027	2.631e-05	0.001422	Up
Atp5k	Molecular_layer	1	1412	-0.03075	0.0393	0.289	0.9984	None	-0.2101	0.05153	5.555e-06	0.0007206	Down	-0.1633	0.04884	0.0002634	0.01051	Down
Atp5l	Molecular_layer	1	2375	-0.04861	0.0385	0.102	0.9984	None	0.1485	0.04324	0.0001268	0.01168	Up	0.222	0.04189	2.374e-08	2.267e-06	Up
Atp5o	Molecular_layer	1	1162	-0.1207	0.05776	0.004278	0.3126	None	0.159	0.0566	0.0008593	0.05667	None	0.325	0.05451	2.809e-10	3.389e-08	Up
Atp6v0b	Molecular_layer	1	793.8	-0.1108	0.06706	0.01155	0.5734	None	0.0508	0.0551	0.233	0.9963	None	0.2106	0.063	0.0001719	0.007272	Up
Atp6v1f	Molecular_layer	1	712.8	-0.08089	0.06826	0.04013	0.9984	None	0.2345	0.07136	9.534e-05	0.009049	Up	0.3858	0.06752	9.882e-10	1.165e-07	Up
Atpif1	Molecular_layer	1	1252	-0.04547	0.04387	0.1428	0.9984	None	0.1491	0.05228	0.0008461	0.05604	None	0.2303	0.05013	8.004e-07	6.019e-05	Up
Atxn2l	Molecular_layer	1	166.7	0.05892	0.08889	0.05126	0.9984	None	-0.2332	0.1626	0.007916	0.2872	None	-0.5378	0.1326	3.102e-06	0.0002081	Down
B230312C02Rik	Molecular_layer	1	39.94	0.008905	0.05525	0.4313	0.9984	None	0.8291	0.2898	0.0001623	0.01435	Up	0.6017	0.28	0.001188	0.03944	Up
Bc1	Molecular_layer	1	229.2	0.7001	0.1261	1.407e-09	1.18e-06	Up	1.438	0.1226	5.488e-33	2.136e-29	Up	0.6845	0.1083	1.508e-11	2.174e-09	Up
Bhlhe22	Molecular_layer	1	258.2	0.2196	0.1209	0.002925	0.2384	None	0.415	0.111	1.047e-05	0.001283	Up	0.1067	0.08904	0.09794	0.7411	None
Bola3	Molecular_layer	1	411.5	-0.07455	0.08008	0.05104	0.9984	None	0.2436	0.08875	0.0005029	0.03675	Up	0.4237	0.08247	2.206e-08	2.12e-06	Up
Bri3	Molecular_layer	1	309.3	-0.5676	0.0956	1.39e-10	1.546e-07	Down	0.02499	0.06391	0.5652	0.9963	None	0.625	0.09492	2.807e-12	4.242e-10	Up
Bsg	Molecular_layer	1	1512	-0.1725	0.04824	3.06e-05	0.007328	Down	0.004159	0.04125	0.8972	0.9963	None	0.1859	0.04674	1.835e-05	0.001042	Up
Cab39l	Molecular_layer	1	79.86	-0.01262	0.05493	0.4209	0.9984	None	0.2741	0.2604	0.008686	0.3031	None	0.5163	0.1919	0.0003532	0.01361	Up
Cacng7	Molecular_layer	1	86.79	0.5598	0.194	0.0001455	0.02409	Up	0.07243	0.1152	0.06722	0.8615	None	-0.1453	0.1597	0.05671	0.5931	None
Cadm3	Molecular_layer	1	369.7	0.1029	0.09612	0.02426	0.8447	None	-0.09599	0.08562	0.06929	0.8694	None	-0.3191	0.08982	3.865e-05	0.001998	Down
Calm1	Molecular_layer	1	3200	-0.03703	0.03409	0.1776	0.9984	None	0.1023	0.03852	0.002855	0.1472	None	0.1586	0.03789	1.039e-05	0.0006217	Up
Calm3	Molecular_layer	1	1150	-0.0004646	0.03753	0.9846	0.9984	None	0.1509	0.05366	0.0009506	0.06167	None	0.1589	0.05045	0.0005307	0.01953	Up
Calr	Molecular_layer	1	723	-0.01018	0.0428	0.7108	0.9984	None	0.2285	0.06932	9.717e-05	0.009167	Up	0.2616	0.06519	9.143e-06	0.0005559	Up
Camk2b	Molecular_layer	1	540.2	-0.006525	0.044	0.8045	0.9984	None	-0.2712	0.0803	5.806e-05	0.005984	Down	-0.2597	0.07574	8.47e-05	0.003947	Down
Camkk2	Molecular_layer	0	164.2	0.01904	0.05418	0.3839	0.9984	None	-0.1834	0.1621	0.01597	0.448	None	-0.3527	0.1372	0.0007734	0.02736	Down
Canx	Molecular_layer	0	792.6	-0.02026	0.0434	0.4757	0.9984	None	0.1175	0.0635	0.01689	0.4677	None	0.1723	0.06134	0.001368	0.04445	Up
Capn15	Molecular_layer	0	140.1	0.1264	0.2544	0.01354	0.6182	None	-0.03282	0.07835	0.3854	0.9963	None	-0.3748	0.1493	0.0008272	0.029	Down
Car8	Molecular_layer	1	3465	0.08421	0.04275	0.0114	0.5725	None	0.1584	0.04377	6.223e-05	0.006364	Up	0.05856	0.04029	0.1192	0.7845	None
Cavin3	Molecular_layer	1	118.5	-0.04085	0.07273	0.06182	0.9984	None	0.08526	0.1184	0.06746	0.862	None	0.4836	0.1619	0.0001575	0.006791	Up
Cbln1	Molecular_layer	1	860.6	-0.03139	0.04722	0.2946	0.9984	None	-0.3657	0.06959	1.004e-08	2.171e-06	Down	-0.299	0.06748	1.13e-06	8.336e-05	Down
Cbln3	Molecular_layer	1	564.6	-0.01873	0.04703	0.4939	0.9984	None	-0.5456	0.08312	2.793e-12	1.035e-09	Down	-0.4952	0.08082	6.468e-11	8.604e-09	Down
Cbx6	Molecular_layer	1	213.5	0.04807	0.07184	0.0935	0.9984	None	-0.1266	0.1226	0.03726	0.7076	None	-0.3695	0.1177	0.0001342	0.005903	Down
Ccdc85b	Molecular_layer	0	308	-0.06644	0.08501	0.05891	0.9984	None	0.07698	0.08349	0.1173	0.9735	None	0.2882	0.1001	0.0004331	0.0164	Up
Cck	Molecular_layer	0	403.7	-0.0169	0.04931	0.4657	0.9984	None	0.1552	0.0964	0.01382	0.4167	None	0.2438	0.09045	0.0009945	0.03417	Up
Ccn3	Molecular_layer	1	13.94	1.264	0.5631	0.0007864	0.09084	None	-0.005968	0.08182	0.6071	0.9963	None	-1.608	0.5552	0.0001627	0.006952	Down
Cd63	Molecular_layer	1	270	-0.3477	0.1104	7.147e-05	0.01365	Down	-0.008281	0.06482	0.8349	0.9963	None	0.3316	0.108	0.0001896	0.007912	Up
Cdc42ep4	Molecular_layer	1	250.6	-0.4618	0.1105	1.315e-06	0.0005686	Down	-0.1028	0.1019	0.06135	0.8435	None	0.24	0.1138	0.004367	0.1137	None
Cdh15	Molecular_layer	0	68.8	-0.04082	0.07536	0.0311	0.9704	None	-0.5512	0.2303	0.0006176	0.04321	Down	-0.08814	0.1321	0.14	0.814	None
Cdk2ap2	Molecular_layer	1	179.1	-0.02632	0.05762	0.2486	0.9984	None	0.2207	0.1436	0.007645	0.283	None	0.408	0.1248	7.547e-05	0.003571	Up
Cdk5rap1	Molecular_layer	1	25.67	1.3	0.405	6.113e-05	0.01204	Up	1.661	0.3985	1.666e-06	0.0002494	Up	0.04254	0.1163	0.2863	0.9356	None
Cdr1os	Molecular_layer	1	171	-0.5455	0.1402	4.169e-06	0.001322	Down	0.03518	0.0765	0.3737	0.9963	None	0.6767	0.136	3.595e-08	3.291e-06	Up
Cds2	Molecular_layer	1	385.6	0.1199	0.09589	0.0149	0.6609	None	-0.06616	0.07373	0.1611	0.9963	None	-0.2875	0.08694	0.0001097	0.005021	Down
Cebpzos	Molecular_layer	1	180.7	-0.003364	0.05041	0.8748	0.9984	None	0.277	0.139	0.002567	0.1345	None	0.3198	0.1242	0.0008535	0.02979	Up
Cenpx	Molecular_layer	1	107	-0.03999	0.07211	0.06125	0.9984	None	0.1155	0.1548	0.03816	0.714	None	0.5371	0.1626	5.178e-05	0.002583	Up
Cfl1	Molecular_layer	1	1550	-0.03376	0.03977	0.2483	0.9984	None	0.1643	0.04954	0.0001596	0.01435	Up	0.2252	0.04746	4.048e-07	3.231e-05	Up
Chchd1	Molecular_layer	1	317.8	-0.3352	0.102	4.577e-05	0.01003	Down	0.03923	0.0683	0.3593	0.9963	None	0.439	0.09767	5.273e-07	4.124e-05	Up
Chchd10	Molecular_layer	1	1694	-0.2372	0.04644	2.069e-08	1.239e-05	Down	0.2226	0.04642	1.925e-07	3.222e-05	Up	0.4833	0.04488	3.921e-28	1.849e-25	Up
Chchd2	Molecular_layer	1	2274	-0.08546	0.04085	0.008046	0.4673	None	0.2959	0.04138	7.69e-14	4.275e-11	Up	0.406	0.03995	2.649e-25	9.818e-23	Up
Chchd7	Molecular_layer	1	162.9	-0.03383	0.06358	0.1419	0.9984	None	0.1978	0.1578	0.01269	0.3919	None	0.4538	0.1339	4.454e-05	0.002265	Up
Chd4	Molecular_layer	1	202.1	-0.01807	0.05294	0.4287	0.9984	None	-0.3925	0.133	0.0001618	0.01435	Down	-0.3018	0.1276	0.001662	0.05185	None
Chn2	Molecular_layer	1	754.2	-0.009409	0.04489	0.7255	0.9984	None	-0.3344	0.08075	2.36e-06	0.0003251	Down	-0.312	0.0779	6.956e-06	0.0004297	Down
Cisd1	Molecular_layer	1	508.9	-0.03751	0.05349	0.2131	0.9984	None	0.1961	0.07971	0.001539	0.08918	None	0.3038	0.07445	5.107e-06	0.0003258	Up
Clpp	Molecular_layer	0	228.3	-0.06831	0.09643	0.04487	0.9984	None	0.0587	0.08182	0.1947	0.9963	None	0.3053	0.116	0.0007918	0.02795	Up
Cnih2	Molecular_layer	1	169.2	-0.05632	0.08822	0.0457	0.9984	None	0.1442	0.1451	0.02787	0.6119	None	0.4828	0.1329	1.729e-05	0.0009919	Up
Cnpy1	Molecular_layer	1	396.2	-0.01319	0.04728	0.6135	0.9984	None	-0.2464	0.09475	0.0007335	0.04937	Down	-0.2131	0.08757	0.002593	0.07488	None
Cnpy2	Molecular_layer	1	154	0.0008387	0.05123	0.9667	0.9984	None	0.4708	0.1452	5.707e-05	0.005922	Up	0.4761	0.1352	2.653e-05	0.001429	Up
Cntn2	Molecular_layer	0	122.9	0.0319	0.06322	0.1384	0.9984	None	-0.08744	0.1216	0.0652	0.855	None	-0.4044	0.1609	0.0007457	0.0265	Down
Commd6	Molecular_layer	0	127.9	-0.003526	0.05187	0.8191	0.9984	None	0.2952	0.1757	0.004057	0.1884	None	0.3643	0.1524	0.001129	0.03779	Up
Cox14	Molecular_layer	1	902.5	-0.1179	0.06167	0.006413	0.4059	None	0.1403	0.05993	0.003931	0.186	None	0.3098	0.0579	1.028e-08	1.039e-06	Up
Cox20	Molecular_layer	0	294.2	-0.03955	0.0618	0.1575	0.9984	None	0.09113	0.08952	0.08213	0.9089	None	0.2568	0.09969	0.001238	0.04091	Up
Cox4i1	Molecular_layer	1	4398	-0.06294	0.0323	0.02053	0.7814	None	0.3287	0.03358	1.019e-23	1.586e-20	Up	0.4067	0.03267	1.307e-36	1.07e-33	Up
Cox5a	Molecular_layer	1	1449	-0.08178	0.04778	0.01988	0.7708	None	0.2393	0.04919	1.153e-07	2.063e-05	Up	0.3557	0.0471	4.461e-15	8.266e-13	Up
Cox5b	Molecular_layer	1	2611	-0.09159	0.03927	0.004256	0.3124	None	0.1159	0.03944	0.001072	0.0681	None	0.2309	0.0387	4.701e-10	5.586e-08	Up
Cox6a1	Molecular_layer	1	2566	-0.08929	0.03904	0.004999	0.3553	None	0.3006	0.03935	1.935e-15	1.205e-12	Up	0.4113	0.03804	2.708e-28	1.317e-25	Up
Cox6b1	Molecular_layer	1	1709	-0.04817	0.04029	0.1124	0.9984	None	0.1532	0.04607	0.0001754	0.01525	Up	0.2293	0.04429	4.276e-08	3.87e-06	Up
Cox6c	Molecular_layer	1	4344	-0.1018	0.03435	0.0005733	0.07124	None	0.005017	0.03183	0.8701	0.9963	None	0.1151	0.03352	0.0003168	0.01242	Up
Cox7a2	Molecular_layer	1	2517	-0.1715	0.0398	1.546e-06	0.000618	Down	0.0938	0.03885	0.006684	0.2634	None	0.2849	0.03883	3.087e-14	5.4e-12	Up
Cox7a2l	Molecular_layer	1	452.1	-0.07041	0.07694	0.05783	0.9984	None	0.1729	0.08843	0.006213	0.2499	None	0.3517	0.08285	2.051e-06	0.0001419	Up
Cox7b	Molecular_layer	1	2186	-0.01424	0.03459	0.6002	0.9984	None	0.141	0.04449	0.0003035	0.02449	Up	0.1703	0.0428	2.148e-05	0.001181	Up
Cox8a	Molecular_layer	1	5312	-0.1028	0.03292	0.0003578	0.04828	Down	0.08254	0.03233	0.005611	0.2335	None	0.2004	0.03243	1.613e-10	2.041e-08	Up
Cplx2	Molecular_layer	1	310.1	0.02473	0.05264	0.3452	0.9984	None	-0.4379	0.1063	2.106e-06	0.0002927	Down	-0.5363	0.09996	5.406e-09	5.844e-07	Down
Cryab	Molecular_layer	1	316.7	-0.03384	0.0586	0.2082	0.9984	None	0.1997	0.1106	0.006037	0.245	None	0.355	0.1008	3.758e-05	0.001956	Up
Cst3	Molecular_layer	1	2904	-0.02911	0.03509	0.2938	0.9984	None	0.2936	0.042	2.289e-13	1.08e-10	Up	0.3392	0.04074	9.42e-18	2.036e-15	Up
Cyb5a	Molecular_layer	1	250.8	-0.05823	0.07975	0.06542	0.9984	None	0.1098	0.101	0.05157	0.7971	None	0.3403	0.1049	0.0001036	0.004772	Up
Cycs	Molecular_layer	1	891.8	-0.1128	0.06468	0.009491	0.5154	None	0.1568	0.06308	0.002188	0.1191	None	0.3262	0.06054	7.749e-09	7.935e-07	Up
Cystm1	Molecular_layer	1	599.1	-0.02495	0.04714	0.383	0.9984	None	0.1625	0.07407	0.00417	0.1909	None	0.2372	0.06976	0.000111	0.005068	Up
D8Ertd738e	Molecular_layer	1	476	-0.06069	0.06785	0.07797	0.9984	None	0.1381	0.08185	0.01577	0.4471	None	0.2973	0.07879	1.855e-05	0.00105	Up
Dapk3	Molecular_layer	1	38.99	-1.675	0.2573	3.822e-12	5.409e-09	Down	-2.06	0.2982	3.34e-13	1.496e-10	Down	-0.04946	0.1205	0.2137	0.894	None
Dbi	Molecular_layer	1	4696	-0.2578	0.0398	6.294e-12	8.164e-09	Down	0.1576	0.03978	1.488e-05	0.001715	Up	0.4328	0.03914	1.809e-29	9.712e-27	Up
Dbndd2	Molecular_layer	1	498	0.06102	0.06705	0.08058	0.9984	None	0.2551	0.08305	0.0001752	0.01525	Up	0.1285	0.07242	0.02945	0.426	None
Dbp	Molecular_layer	1	259	-0.3024	0.1097	0.0002537	0.03622	Down	-0.1408	0.1107	0.02562	0.5891	None	0.08007	0.08679	0.1969	0.8774	None
Dctpp1	Molecular_layer	0	69.77	-0.02622	0.06192	0.1049	0.9984	None	0.05959	0.1023	0.1007	0.9453	None	0.4996	0.2106	0.0008251	0.02899	Up
Ddt	Molecular_layer	1	364.4	-0.2641	0.09901	0.0003588	0.04828	Down	0.06553	0.07469	0.1655	0.9963	None	0.4129	0.09201	5.657e-07	4.381e-05	Up
Ddx17	Molecular_layer	0	402	0.01783	0.04797	0.5059	0.9984	None	-0.1707	0.09257	0.007693	0.2838	None	-0.2449	0.08545	0.0006024	0.02175	Down
Ddx5	Molecular_layer	1	1659	0.01819	0.03654	0.5106	0.9984	None	-0.1497	0.04925	0.0004767	0.0355	Down	-0.186	0.04713	2.076e-05	0.001158	Down
Dennd6b	Molecular_layer	0	106.3	0.02936	0.06195	0.1491	0.9984	None	-0.07954	0.1167	0.07206	0.875	None	-0.41	0.1717	0.001012	0.03461	Down
Dnajc15	Molecular_layer	1	269.9	-0.02635	0.05546	0.2894	0.9984	None	0.2488	0.1171	0.002268	0.1217	None	0.3868	0.1063	2.11e-05	0.001171	Up
Dnlz	Molecular_layer	1	153	-0.03341	0.06371	0.1388	0.9984	None	0.1344	0.1479	0.03197	0.6522	None	0.4169	0.1403	0.0001937	0.00806	Up
Dnm1	Molecular_layer	0	1314	0.01827	0.03751	0.508	0.9984	None	-0.1014	0.04999	0.01496	0.4368	None	-0.1405	0.04847	0.001472	0.04703	Down
Drap1	Molecular_layer	1	428	-0.0211	0.04938	0.434	0.9984	None	0.4275	0.0854	3.356e-08	6.53e-06	Up	0.4988	0.08081	4.733e-11	6.406e-09	Up
Dvl3	Molecular_layer	1	122.8	-0.0117	0.05297	0.5458	0.9984	None	-0.4147	0.1728	0.000703	0.04758	Down	-0.3278	0.1653	0.003298	0.08944	None
Dynll1	Molecular_layer	1	796.9	-0.09825	0.06995	0.0205	0.7814	None	0.4279	0.06684	9.854e-12	3.408e-09	Up	0.5855	0.06423	5.154e-21	1.337e-18	Up
Dynlrb1	Molecular_layer	1	962.5	-0.04466	0.04804	0.1582	0.9984	None	0.3283	0.05894	1.931e-09	4.554e-07	Up	0.4138	0.05623	1.621e-14	2.868e-12	Up
Edf1	Molecular_layer	1	755.9	-0.1679	0.06871	0.001045	0.1114	None	0.1372	0.06577	0.007351	0.2777	None	0.3624	0.06378	1.334e-09	1.549e-07	Up
Eef1a1	Molecular_layer	1	2313	-0.1443	0.04233	7.856e-05	0.0146	Down	0.05526	0.03926	0.1147	0.9699	None	0.2175	0.04113	2.628e-08	2.479e-06	Up
Eef1a2	Molecular_layer	1	592.5	-1.055	0.07797	3.927e-43	6.112e-39	Down	-1.107	0.08234	1.991e-42	3.099e-38	Down	-0.033	0.06905	0.5487	0.9897	None
Eef1akmt1	Molecular_layer	1	151.2	-0.03216	0.0626	0.1523	0.9984	None	0.123	0.1387	0.03891	0.7175	None	0.3932	0.1393	0.000321	0.01255	Up
Eef1b2	Molecular_layer	1	483.3	-0.04194	0.05724	0.1712	0.9984	None	0.3102	0.08229	1.168e-05	0.001409	Up	0.4283	0.07745	2.575e-09	2.863e-07	Up
Egr1	Molecular_layer	1	53.42	-0.005107	0.05379	0.7143	0.9984	None	-0.6697	0.2649	0.000419	0.03197	Down	-0.591	0.258	0.0009212	0.03186	Down
Eif1	Molecular_layer	1	1590	-0.117	0.04738	0.001863	0.1716	None	0.1014	0.04595	0.009957	0.3297	None	0.2496	0.04567	7.548e-09	7.781e-07	Up
Eif3f	Molecular_layer	1	366.5	-0.07861	0.08658	0.04532	0.9984	None	0.08766	0.08051	0.08687	0.9155	None	0.285	0.08877	0.0001522	0.006618	Up
Eif3j1	Molecular_layer	0	89.84	-0.04072	0.07419	0.04385	0.9984	None	0.04335	0.08696	0.2256	0.9963	None	0.4368	0.1873	0.001035	0.03517	Up
Eif3k	Molecular_layer	1	364.6	-0.01237	0.04851	0.6187	0.9984	None	0.2605	0.09897	0.0006244	0.04339	Up	0.3206	0.09159	4.617e-05	0.002333	Up
Eif5a	Molecular_layer	1	694.5	-0.07431	0.06719	0.05098	0.9984	None	0.1522	0.07244	0.005824	0.2398	None	0.3029	0.06938	1.479e-06	0.0001075	Up
Elob	Molecular_layer	1	1948	-0.09877	0.04389	0.004427	0.3217	None	0.1437	0.04411	0.0002485	0.02068	Up	0.2716	0.04278	3.247e-11	4.512e-09	Up
Elof1	Molecular_layer	1	230.9	-0.004319	0.04969	0.8556	0.9984	None	0.3186	0.1225	0.0005303	0.03804	Up	0.3542	0.1125	0.0001334	0.005881	Up
Emc6	Molecular_layer	1	311.6	-0.0193	0.05145	0.4422	0.9984	None	0.1838	0.1092	0.008788	0.3048	None	0.2862	0.09989	0.0004551	0.01707	Up
Enho	Molecular_layer	1	336.1	-0.1776	0.1195	0.006044	0.391	None	0.04834	0.07231	0.2785	0.9963	None	0.3289	0.1013	0.0001122	0.005091	Up
Eno1	Molecular_layer	1	319.9	-0.2969	0.105	0.0002075	0.03136	Down	-0.05069	0.07301	0.2557	0.9963	None	0.1868	0.0995	0.01232	0.246	None
Eno2	Molecular_layer	1	881.3	-0.02455	0.04292	0.397	0.9984	None	-0.2046	0.06359	0.0001519	0.01374	Down	-0.1604	0.05933	0.001996	0.06021	None
Enpp2	Molecular_layer	1	1260	-0.3652	0.1042	2.078e-05	0.005216	Down	-0.0844	0.08648	0.09534	0.941	None	0.1926	0.1008	0.01034	0.2164	None
Ewsr1	Molecular_layer	1	298.6	0.09806	0.1084	0.02732	0.9028	None	-0.1739	0.1136	0.0128	0.3936	None	-0.4243	0.1009	1.969e-06	0.0001374	Down
Fabp3	Molecular_layer	1	365.7	-0.1418	0.1105	0.01085	0.5593	None	0.1972	0.09895	0.004468	0.201	None	0.4585	0.09116	3.565e-08	3.283e-06	Up
Fabp5	Molecular_layer	0	303.9	-0.03124	0.05723	0.24	0.9984	None	0.1135	0.1004	0.04663	0.7637	None	0.2658	0.1029	0.001161	0.03879	Up
Fabp7	Molecular_layer	1	206.7	-0.4745	0.1203	3.505e-06	0.001161	Down	0.0474	0.07704	0.2767	0.9963	None	0.6118	0.1163	8.589e-09	8.737e-07	Up
Fam131b	Molecular_layer	1	103.6	0.009791	0.05324	0.5845	0.9984	None	-0.4247	0.2012	0.001316	0.0803	None	-0.5482	0.1784	0.0001132	0.005106	Down
Fam162a	Molecular_layer	1	316.7	-0.0813	0.09856	0.03936	0.9984	None	0.2133	0.1062	0.00367	0.1774	None	0.4432	0.09688	3.478e-07	2.791e-05	Up
Fam81a	Molecular_layer	1	27.05	-0.03137	0.0687	0.002198	0.1947	None	0.02105	0.0834	0.3099	0.9963	None	1.177	0.3596	4.358e-05	0.002224	Up
Fat2	Molecular_layer	1	345.9	-0.01514	0.04955	0.537	0.9984	None	-0.3525	0.1061	5.299e-05	0.005535	Down	-0.2973	0.1014	0.0003512	0.01357	Down
Fau	Molecular_layer	1	2613	-0.1427	0.04041	4.71e-05	0.01013	Down	0.2091	0.04021	2.495e-08	5.11e-06	Up	0.3732	0.03896	9.417e-23	3.186e-20	Up
Fis1	Molecular_layer	1	814.2	-0.09413	0.06729	0.02267	0.8188	None	0.2912	0.06654	9.713e-07	0.0001512	Up	0.4458	0.06343	1.669e-13	2.793e-11	Up
Fkbp1a	Molecular_layer	0	644.2	-0.02144	0.04513	0.4376	0.9984	None	0.1265	0.06881	0.01459	0.4308	None	0.191	0.06602	0.0008742	0.03037	Up
Fkbp2	Molecular_layer	1	530.2	-0.06983	0.07121	0.0597	0.9984	None	0.2634	0.07999	8.08e-05	0.007959	Up	0.4193	0.07517	1.98e-09	2.249e-07	Up
Fkbp3	Molecular_layer	1	463.8	-0.006788	0.04533	0.7961	0.9984	None	0.2387	0.08361	0.0003754	0.02907	Up	0.2697	0.07761	6.677e-05	0.003248	Up
Fkbp5	Molecular_layer	1	26.58	1.168	0.3569	4.526e-05	0.01003	Up	0.03507	0.09106	0.07437	0.8803	None	-0.1435	0.2511	0.02022	0.3363	None
Fth1	Molecular_layer	1	6137	0.06096	0.03296	0.02688	0.8946	None	0.3475	0.03448	2.491e-25	5.539e-22	Up	0.2747	0.03369	5.036e-17	1.059e-14	Up
Ftl1	Molecular_layer	1	1362	-0.3028	0.0547	1.897e-09	1.426e-06	Down	0.4224	0.05348	1.875e-16	1.459e-13	Up	0.7479	0.0522	9.188e-48	2.043e-44	Up
Fus	Molecular_layer	1	226	0.02881	0.05694	0.2541	0.9984	None	-0.2714	0.1305	0.002307	0.1232	None	-0.4235	0.1157	1.834e-05	0.001042	Down
Fxyd1	Molecular_layer	1	459.5	-0.2505	0.08799	0.0002261	0.03319	Down	0.05573	0.06687	0.2191	0.9963	None	0.3695	0.08282	7.249e-07	5.477e-05	Up
Gabarap	Molecular_layer	1	511.8	-0.0343	0.05336	0.2419	0.9984	None	0.2159	0.08395	0.001009	0.06493	None	0.3218	0.07844	4.27e-06	0.0002804	Up
Gabarapl2	Molecular_layer	1	1039	-0.05545	0.05008	0.09556	0.9984	None	0.1411	0.05772	0.003028	0.1545	None	0.2429	0.0556	2.065e-06	0.0001422	Up
Gapdh	Molecular_layer	1	5008	-0.2079	0.03144	3.117e-12	4.851e-09	Down	0.1412	0.0315	1.847e-06	0.0002686	Up	0.3608	0.03094	2.029e-32	1.263e-29	Up
Gas5	Molecular_layer	1	551.2	-0.1102	0.08062	0.01684	0.7049	None	0.1079	0.07291	0.03653	0.7028	None	0.3019	0.07377	4.967e-06	0.0003182	Up
Gas7	Molecular_layer	1	318.3	0.2057	0.1047	0.002415	0.2095	None	-0.1992	0.1101	0.006044	0.245	None	-0.5172	0.0964	5.555e-09	5.963e-07	Down
Glrx5	Molecular_layer	1	282.9	-0.08993	0.1088	0.03111	0.9704	None	0.2711	0.107	0.0007681	0.05109	None	0.5101	0.09809	1.311e-08	1.316e-06	Up
Glul	Molecular_layer	1	808.1	0.2213	0.06524	4.417e-05	0.01003	Up	-0.1167	0.06618	0.01969	0.51	None	-0.3888	0.06391	1.076e-10	1.384e-08	Down
Gm15446	Molecular_layer	1	14.12	-4.46	0.8634	1.095e-07	5.879e-05	Down	-0.001824	0.0807	0.9064	0.9963	None	4.402	0.8627	1.529e-07	1.287e-05	Up
Gm1673	Molecular_layer	1	555	-0.1903	0.07818	0.0009225	0.1011	None	0.08261	0.06709	0.08452	0.9124	None	0.337	0.07242	3.325e-07	2.681e-05	Up
Gm21887	Molecular_layer	1	3.203	0.001088	0.05539	0.557	0.9984	None	0.02401	0.0874	0.001389	0.08313	None	2.648	1.209	0.001559	0.04932	Up
Gm29521	Molecular_layer	1	65.17	-0.5707	0.2351	0.0004773	0.06041	None	-0.002203	0.07633	0.9383	0.9963	None	0.5595	0.232	0.0006869	0.02463	Up
Gm47283	Molecular_layer	1	105	5.418	1.222	5.344e-07	0.0002521	Up	9.19	1.275	1.019e-15	6.612e-13	Up	3.508	0.1907	1.66e-76	2.584e-72	Up
Gm49980	Molecular_layer	1	581.7	0.5476	0.06888	9.867e-17	3.839e-13	Up	-0.1561	0.07893	0.007126	0.2739	None	-0.7548	0.07053	6.281e-28	2.875e-25	Down
Gng11	Molecular_layer	1	185.7	-0.3615	0.1395	0.0003617	0.04828	Down	0.04906	0.0811	0.2453	0.9963	None	0.5359	0.1287	1.88e-06	0.000133	Up
Gng13	Molecular_layer	1	4180	-0.062	0.0366	0.03464	0.9984	None	-0.2526	0.03946	1.392e-11	4.711e-09	Down	-0.1743	0.03842	1.705e-06	0.0001229	Down
Gng3	Molecular_layer	1	694.3	-0.04335	0.05239	0.1695	0.9984	None	0.1293	0.06841	0.01271	0.3919	None	0.2318	0.06626	7.233e-05	0.003468	Up
Gpr162	Molecular_layer	1	284.1	0.00138	0.04791	0.9571	0.9984	None	-0.2613	0.1135	0.001443	0.08541	None	-0.2807	0.1041	0.000763	0.02705	Down
Gpx1	Molecular_layer	0	328.8	-0.01447	0.04982	0.5556	0.9984	None	0.176	0.1074	0.01027	0.3357	None	0.2589	0.09854	0.001086	0.03658	Up
Gpx4	Molecular_layer	1	1739	-0.09762	0.04647	0.005994	0.3903	None	0.2284	0.04669	1.134e-07	2.063e-05	Up	0.3578	0.0449	1.655e-16	3.303e-14	Up
Grcc10	Molecular_layer	1	837	-0.09409	0.06238	0.02032	0.7814	None	0.2662	0.06226	1.705e-06	0.0002527	Up	0.4131	0.05917	2.507e-13	4.151e-11	Up
Grik2	Molecular_layer	0	65.3	-0.03012	0.06465	0.07652	0.9984	None	-0.5814	0.2342	0.0004865	0.03594	Down	-0.1376	0.1786	0.05445	0.5804	None
Grin2c	Molecular_layer	1	370.6	-0.0167	0.04852	0.5321	0.9984	None	-0.2555	0.09766	0.0006661	0.04547	Down	-0.21	0.09016	0.003462	0.09307	None
Gstm1	Molecular_layer	1	603.8	-0.07602	0.06926	0.04775	0.9984	None	0.09411	0.06858	0.05585	0.8194	None	0.2486	0.07123	7.264e-05	0.003468	Up
Guk1	Molecular_layer	1	294.5	-0.00727	0.04905	0.7551	0.9984	None	0.3993	0.1073	1.136e-05	0.001381	Up	0.4403	0.1008	9.026e-07	6.69e-05	Up
H2afv	Molecular_layer	1	309.1	-0.06455	0.08029	0.06067	0.9984	None	0.1	0.08905	0.06273	0.8487	None	0.3049	0.09469	0.0001318	0.005828	Up
H2afz	Molecular_layer	1	751	-0.1115	0.07041	0.01262	0.5951	None	0.07566	0.06091	0.09757	0.941	None	0.2478	0.06579	2.563e-05	0.00139	Up
H3f3a	Molecular_layer	1	983.4	-0.076	0.05655	0.03986	0.9984	None	0.1095	0.05792	0.01759	0.4762	None	0.2372	0.05746	6.248e-06	0.000389	Up
Hba-a1	Molecular_layer	1	130.6	-0.03291	0.07121	2.138e-06	0.0008321	None	0.9921	0.5599	0.00171	0.0975	None	3.437	0.4639	5.923e-15	1.085e-12	Up
Hba-a2	Molecular_layer	1	125.6	-0.02441	0.06331	0.001382	0.1361	None	1.351	0.4414	7.577e-05	0.007609	Up	2.797	0.4177	9.73e-13	1.53e-10	Up
Hbb-bs	Molecular_layer	1	356	-1.92	0.353	2.374e-09	1.68e-06	Down	1.047	0.3713	0.0001615	0.01435	Up	3.223	0.3433	2.953e-22	8.839e-20	Up
Hbb-bt	Molecular_layer	1	49.16	-0.01835	0.05981	0.001129	0.1176	None	0.9266	0.7839	0.003595	0.176	None	3.056	0.5477	1.103e-09	1.291e-07	Up
Hcfc1r1	Molecular_layer	1	603.1	-0.03701	0.05189	0.2229	0.9984	None	0.1989	0.07541	0.0009329	0.06101	None	0.2984	0.07081	2.969e-06	0.0002009	Up
Higd2a	Molecular_layer	1	427.6	-0.02851	0.05378	0.2944	0.9984	None	0.1942	0.09851	0.004782	0.2103	None	0.3108	0.09133	6.955e-05	0.003352	Up
Hint1	Molecular_layer	1	1784	-0.07956	0.04594	0.02182	0.8018	None	0.2397	0.0474	5.907e-08	1.121e-05	Up	0.3475	0.0456	2.725e-15	5.172e-13	Up
Hmgb1	Molecular_layer	0	328.2	-0.04286	0.06359	0.1392	0.9984	None	0.08905	0.08713	0.08579	0.9144	None	0.2571	0.09764	0.001083	0.03657	Up
Hnrnpa2b1	Molecular_layer	1	901.7	0.01131	0.03976	0.6822	0.9984	None	-0.1839	0.06111	0.0003593	0.02824	Down	-0.2144	0.05755	3.913e-05	0.002017	Down
Hopx	Molecular_layer	1	637.4	-0.4819	0.06762	5.316e-14	1.379e-10	Down	-0.2649	0.07152	1.812e-05	0.002059	Down	0.1759	0.06905	0.002772	0.07858	None
Hsbp1	Molecular_layer	1	648.2	-0.01427	0.04371	0.5974	0.9984	None	0.1798	0.07095	0.001486	0.08728	None	0.226	0.06641	0.000118	0.005261	Up
Hsp90aa1	Molecular_layer	1	1801	6.673e-05	0.03498	0.9761	0.9984	None	0.1871	0.04712	1.283e-05	0.001524	Up	0.1907	0.04487	5.458e-06	0.0003467	Up
Hspa5	Molecular_layer	1	580.8	0.292	0.07426	4.648e-06	0.001419	Up	0.6358	0.07293	1.553e-19	1.726e-16	Up	0.3053	0.06802	8.321e-07	6.197e-05	Up
Hspa8	Molecular_layer	1	3836	0.01182	0.02844	0.6289	0.9984	None	0.1672	0.03386	1.49e-07	2.635e-05	Up	0.1532	0.03247	8.054e-07	6.027e-05	Up
Hspe1	Molecular_layer	1	630.7	-0.04609	0.05488	0.1515	0.9984	None	0.3013	0.07163	1.996e-06	0.0002876	Up	0.4082	0.06775	1.478e-10	1.886e-08	Up
Iah1	Molecular_layer	0	79.95	-0.00903	0.05408	0.556	0.9984	None	0.2841	0.2669	0.00812	0.2912	None	0.4827	0.1985	0.000734	0.02614	Up
Ifi27	Molecular_layer	1	99.08	-0.5441	0.173	6.257e-05	0.01217	Down	-0.08185	0.1185	0.06929	0.8694	None	0.1728	0.1706	0.03887	0.4903	None
Ifitm3	Molecular_layer	1	78.93	-0.5699	0.1942	0.0001197	0.0207	Down	-0.5187	0.2112	0.0005376	0.03839	Down	0.008057	0.09762	0.8738	0.9994	None
Immp1l	Molecular_layer	1	119.7	-0.0003055	0.0523	0.9916	0.9984	None	0.4038	0.1827	0.001106	0.06997	None	0.4266	0.1663	0.0005941	0.02155	Up
Iscu	Molecular_layer	1	445.7	-0.02428	0.05037	0.3753	0.9984	None	0.3999	0.08531	1.727e-07	2.922e-05	Up	0.4802	0.08075	1.987e-10	2.474e-08	Up
Ivns1abp	Molecular_layer	1	368	0.9358	0.08804	1.176e-27	9.155e-24	Up	0.001998	0.06293	0.9593	0.9963	None	-0.9307	0.08859	4.826e-27	1.977e-24	Down
Jund	Molecular_layer	1	257.3	-0.3888	0.1096	1.732e-05	0.004494	Down	-0.09171	0.09501	0.08486	0.9127	None	0.1911	0.1083	0.01369	0.2611	None
Kcnc1	Molecular_layer	1	592.6	-0.1456	0.08849	0.006445	0.4062	None	-0.329	0.08472	6.929e-06	0.000884	Down	-0.1171	0.07594	0.05223	0.5677	None
Kcnc3	Molecular_layer	1	632.6	0.1437	0.07807	0.005129	0.3612	None	-0.04255	0.0597	0.3269	0.9963	None	-0.2397	0.07246	0.0001481	0.006475	Down
Kcnt1	Molecular_layer	1	280.5	0.01133	0.04913	0.6396	0.9984	None	-0.2578	0.1153	0.001719	0.09763	None	-0.3227	0.105	0.0002005	0.00828	Down
Kctd12	Molecular_layer	1	509	0.2773	0.09499	0.0001732	0.02722	Up	0.2617	0.09687	0.000507	0.03688	Up	-0.008981	0.06851	0.8688	0.9994	None
Kdm2a	Molecular_layer	1	45.28	0.01767	0.05792	0.1734	0.9984	None	-0.452	0.4291	0.005483	0.23	None	-0.9456	0.2793	3.265e-05	0.001722	Down
Kmt2d	Molecular_layer	1	51.72	0.04313	0.08011	0.01272	0.5981	None	-0.03755	0.08937	0.1683	0.9963	None	-0.7407	0.2463	0.0001168	0.005224	Down
Kndc1	Molecular_layer	1	237.6	0.03537	0.06128	0.1778	0.9984	None	-0.2086	0.1345	0.008237	0.2927	None	-0.3985	0.117	4.809e-05	0.002415	Down
Lamp5	Molecular_layer	0	21.11	-0.01378	0.05738	0.08689	0.9984	None	0.03172	0.08911	0.09442	0.941	None	1.006	0.4228	0.0005788	0.0211	Up
Lamtor2	Molecular_layer	1	315.3	-0.03812	0.05964	0.1828	0.9984	None	0.1573	0.1006	0.01431	0.4234	None	0.3103	0.09389	9.613e-05	0.00444	Up
Lamtor4	Molecular_layer	1	351.4	-0.02398	0.05216	0.3622	0.9984	None	0.205	0.101	0.003804	0.1828	None	0.3108	0.09278	8.268e-05	0.003865	Up
Lgals1	Molecular_layer	1	87.12	-0.441	0.2204	0.001289	0.1302	None	0.01874	0.0774	0.5527	0.9963	None	0.5916	0.1976	0.0001316	0.005828	Up
Lgals3bp	Molecular_layer	1	26.85	-0.02622	0.06384	0.01883	0.7592	None	-0.9891	0.3749	0.0003037	0.02449	Down	-0.06016	0.1288	0.1249	0.7921	None
Lhx1os	Molecular_layer	1	517.7	-0.06895	0.07198	0.06145	0.9984	None	0.1693	0.08245	0.005249	0.2263	None	0.3337	0.07773	1.776e-06	0.0001268	Up
Lmtk2	Molecular_layer	1	90.25	0.4885	0.2053	0.0005767	0.07124	None	-0.001156	0.07586	0.9685	0.9963	None	-0.5072	0.1989	0.0005397	0.01975	Down
Lpp	Molecular_layer	1	19.7	-0.01322	0.05696	0.1511	0.9984	None	-1.251	0.4449	0.0002001	0.01711	Down	-0.1166	0.2106	0.01063	0.2222	None
Lrp8	Molecular_layer	1	114.7	0.02353	0.05827	0.2304	0.9984	None	-0.1892	0.2315	0.01596	0.448	None	-0.485	0.1699	0.0002412	0.00975	Down
Lrrc17	Molecular_layer	1	17.67	-0.008648	0.056	0.1891	0.9984	None	1.325	0.4374	0.0001005	0.009427	Up	2.006	0.418	9.335e-08	8.072e-06	Up
Lsm6	Molecular_layer	1	367.1	-0.08049	0.08741	0.04264	0.9984	None	0.1675	0.09351	0.008813	0.3048	None	0.3705	0.08718	1.854e-06	0.0001318	Up
Lxn	Molecular_layer	1	339.8	-0.3083	0.0958	6.075e-05	0.01204	Down	-0.03395	0.06533	0.4555	0.9963	None	0.2423	0.0936	0.001352	0.04401	Up
Lysmd2	Molecular_layer	1	278.2	-0.01342	0.05025	0.5736	0.9984	None	0.296	0.1114	0.0004948	0.03633	Up	0.3702	0.1026	2.492e-05	0.001356	Up
Lzts3	Molecular_layer	1	42.76	0.8186	0.2706	9.583e-05	0.01734	Up	0.01885	0.08171	0.4183	0.9963	None	-0.5493	0.2865	0.00211	0.06327	None
Man2a2	Molecular_layer	0	194	0.02796	0.05831	0.2373	0.9984	None	-0.1245	0.1344	0.03928	0.7175	None	-0.3332	0.1327	0.0009594	0.03311	Down
Manf	Molecular_layer	1	277.6	0.05664	0.07724	0.07184	0.9984	None	0.6459	0.1031	2.025e-11	6.568e-09	Up	0.4623	0.09667	1.235e-07	1.062e-05	Up
Map1lc3a	Molecular_layer	1	694.4	-0.1312	0.07091	0.005862	0.3871	None	0.1927	0.06835	0.0006008	0.04232	Up	0.3852	0.06469	2.363e-10	2.919e-08	Up
Mbp	Molecular_layer	1	2434	0.2949	0.03973	7.484e-15	2.33e-11	Up	0.03778	0.03781	0.2603	0.9963	None	-0.2494	0.03948	4.447e-11	6.072e-09	Down
Med13	Molecular_layer	0	72.61	0.01745	0.05662	0.2807	0.9984	None	-0.0852	0.1363	0.03888	0.7175	None	-0.4735	0.2168	0.001388	0.04491	Down
Med21	Molecular_layer	1	147.3	-0.003445	0.05153	0.854	0.9984	None	0.3475	0.1581	0.001289	0.079	None	0.3967	0.1426	0.0003583	0.01377	Up
Med28	Molecular_layer	1	303.1	-0.05374	0.07359	0.08542	0.9984	None	0.1779	0.1087	0.009955	0.3297	None	0.3819	0.09962	1.021e-05	0.0006137	Up
Med31	Molecular_layer	0	109.6	-0.01913	0.05647	0.2894	0.9984	None	0.1435	0.1876	0.0258	0.5898	None	0.4211	0.1667	0.0006692	0.02405	Up
Meg3	Molecular_layer	1	1343	0.1424	0.06405	0.002423	0.2095	None	-0.231	0.06458	3.535e-05	0.003795	Down	-0.4229	0.06129	4.61e-13	7.475e-11	Down
Metrn	Molecular_layer	1	1211	-0.2383	0.05771	2.356e-06	0.0008946	Down	0.2529	0.05713	9.204e-07	0.0001447	Up	0.5242	0.05503	1.193e-22	3.869e-20	Up
Mgst1	Molecular_layer	1	81.54	-0.0398	0.07467	0.02723	0.9017	None	0.09079	0.1412	0.03999	0.7254	None	0.7243	0.1999	1.386e-05	0.0008142	Up
Mgst3	Molecular_layer	1	476.9	0.008603	0.04571	0.7457	0.9984	None	0.3108	0.08336	1.365e-05	0.00161	Up	0.2909	0.07815	2.33e-05	0.001272	Up
Micos10	Molecular_layer	1	996.9	-0.08083	0.05716	0.03001	0.9513	None	0.1789	0.05957	0.0003878	0.02973	Up	0.312	0.05685	4.694e-09	5.109e-07	Up
Mien1	Molecular_layer	1	365.3	-0.05472	0.07115	0.09226	0.9984	None	0.09701	0.08669	0.06734	0.8615	None	0.2781	0.09323	0.0003343	0.01301	Up
Mif	Molecular_layer	1	1267	-0.003645	0.03721	0.8928	0.9984	None	0.3102	0.05195	1.784e-10	5.141e-08	Up	0.3202	0.04951	1.149e-11	1.672e-09	Up
Mir124a-1hg	Molecular_layer	0	375	0.05549	0.06971	0.09306	0.9984	None	-0.09018	0.08476	0.0833	0.9101	None	-0.2627	0.09193	0.0005406	0.01975	Down
Mobp	Molecular_layer	1	429.8	0.3858	0.083	1.728e-07	8.677e-05	Up	0.04549	0.06586	0.301	0.9963	None	-0.2957	0.08206	3.601e-05	0.001893	Down
Mpc1	Molecular_layer	1	947.3	-0.06262	0.05263	0.07036	0.9984	None	0.2848	0.0584	9.229e-08	1.71e-05	Up	0.3927	0.05558	1.462e-13	2.474e-11	Up
Mpc2	Molecular_layer	1	727	-0.09327	0.07151	0.02625	0.8862	None	0.2008	0.07175	0.0005673	0.04032	Up	0.3663	0.06792	6.563e-09	6.949e-07	Up
Mpp6	Molecular_layer	1	180.9	-0.1554	0.1927	0.01134	0.5712	None	0.0743	0.09557	0.1171	0.9735	None	0.4467	0.1278	3.112e-05	0.001653	Up
Mrpl12	Molecular_layer	1	290	-0.02982	0.05678	0.2487	0.9984	None	0.2134	0.1142	0.004797	0.2103	None	0.3608	0.1035	4.132e-05	0.002122	Up
Mrpl13	Molecular_layer	0	186.7	-0.02509	0.05733	0.2593	0.9984	None	0.1546	0.145	0.0235	0.5644	None	0.3587	0.1313	0.0004729	0.01769	Up
Mrpl18	Molecular_layer	1	203.2	-0.06519	0.0958	0.04281	0.9984	None	0.09895	0.1077	0.06708	0.8614	None	0.3936	0.1208	8.199e-05	0.003844	Up
[truncated: 674 more rows]

## Sheet: S3b
Region	Comparison	Direction	ID	Description	GeneRatio	BgRatio	pvalue	p.adjust	qvalue	geneID	Count
DCN	CD_vs_HC	CD up	GO:0007613	memory	5/27	164/28891	4.046e-07	0.0003032	0.0001776	Calb1/Egr1/Npas4/S100b/Slc6a1	5
DCN	CD_vs_HC	CD up	GO:0050890	cognition	6/27	371/28891	1.015e-06	0.0003032	0.0001776	Calb1/Egr1/Fam107a/Npas4/S100b/Slc6a1	6
DCN	CD_vs_HC	CD up	GO:1902075	cellular response to salt	5/27	202/28891	1.133e-06	0.0003032	0.0001776	Egr1/Fos/Itpr1/Junb/Slc1a3	5
DCN	CD_vs_HC	CD up	GO:0007616	long-term memory	3/27	43/28891	8.761e-06	0.001759	0.001031	Calb1/Egr1/Npas4	3
DCN	CD_vs_HC	CD up	GO:0007611	learning or memory	5/27	331/28891	1.257e-05	0.001997	0.00117	Calb1/Egr1/Npas4/S100b/Slc6a1	5
DCN	CD_vs_HC	CD up	GO:1902074	response to salt	5/27	343/28891	1.492e-05	0.001997	0.00117	Egr1/Fos/Itpr1/Junb/Slc1a3	5
DCN	CD_vs_HC	CD up	GO:0048167	regulation of synaptic plasticity	5/27	393/28891	2.864e-05	0.003286	0.001925	Calb1/Egr1/Fam107a/Npas4/S100b	5
DCN	CD_vs_HC	CD up	GO:0048545	response to steroid hormone	4/27	253/28891	8.601e-05	0.008633	0.005059	Fam107a/Mbp/Npas4/Paqr8	4
DCN	CD_vs_HC	CD up	GO:0031668	cellular response to extracellular stimulus	4/27	271/28891	0.0001121	0.009163	0.005369	Cdkn1a/Fam107a/Fos/Slc2a1	4
DCN	CD_vs_HC	CD up	GO:0035914	skeletal muscle cell differentiation	3/27	101/28891	0.0001141	0.009163	0.005369	Egr1/Fos/S100b	3
DCN	CD_vs_HC	CD up	GO:0007614	short-term memory	2/27	18/28891	0.0001275	0.009307	0.005454	Calb1/Npas4	2
DCN	CD_vs_HC	CD up	GO:0071496	cellular response to external stimulus	4/27	335/28891	0.0002524	0.01572	0.00921	Cdkn1a/Fam107a/Fos/Slc2a1	4
DCN	CD_vs_HC	CD up	GO:0009636	response to toxic substance	3/27	136/28891	0.0002747	0.01572	0.00921	Mbp/Mt2/Slc6a1	3
DCN	CD_vs_HC	CD up	GO:0050806	positive regulation of synaptic transmission	4/27	348/28891	0.0002917	0.01572	0.00921	Calb1/Fam107a/S100b/Slc1a3	4
DCN	CD_vs_HC	CD up	GO:0071276	cellular response to cadmium ion	2/27	28/28891	0.0003132	0.01572	0.00921	Fos/Mt2	2
DCN	CD_vs_HC	CD up	GO:0071480	cellular response to gamma radiation	2/27	28/28891	0.0003132	0.01572	0.00921	Cdkn1a/Egr1	2
DCN	CD_vs_HC	CD up	GO:0048169	regulation of long-term neuronal synaptic plasticity	2/27	37/28891	0.000549	0.02583	0.01513	Egr1/S100b	2
DCN	CD_vs_HC	CD up	GO:0071478	cellular response to radiation	3/27	178/28891	0.0006032	0.02583	0.01513	Cdkn1a/Egr1/Pcp2	3
DCN	CD_vs_HC	CD up	GO:0046686	response to cadmium ion	2/27	40/28891	0.0006418	0.02583	0.01513	Fos/Mt2	2
DCN	CD_vs_HC	CD up	GO:0009314	response to radiation	4/27	433/28891	0.0006645	0.02583	0.01513	Cdkn1a/Egr1/Pcp2/Slc1a3	4
DCN	CD_vs_HC	CD up	GO:0071248	cellular response to metal ion	3/27	187/28891	0.0006961	0.02583	0.01513	Fos/Junb/Mt2	3
DCN	CD_vs_HC	CD up	GO:2000279	negative regulation of DNA biosynthetic process	2/27	42/28891	0.0007076	0.02583	0.01513	Cdkn1a/Dusp1	2
DCN	CD_vs_HC	CD up	GO:0032228	regulation of synaptic transmission, GABAergic	2/27	44/28891	0.0007766	0.02711	0.01589	Npas4/Slc6a1	2
DCN	CD_vs_HC	CD up	GO:0009991	response to extracellular stimulus	4/27	460/28891	0.0008326	0.02778	0.01628	Cdkn1a/Fam107a/Fos/Slc2a1	4
DCN	CD_vs_HC	CD up	GO:0006469	negative regulation of protein kinase activity	3/27	204/28891	0.0008954	0.02778	0.01628	Cdkn1a/Dbndd2/Dusp1	3
DCN	CD_vs_HC	CD up	GO:0031400	negative regulation of protein modification process	4/27	473/28891	0.0009235	0.02778	0.01628	Cdkn1a/Dbndd2/Dusp1/Ivns1abp	4
DCN	CD_vs_HC	CD up	GO:0098739	import across plasma membrane	3/27	207/28891	0.000934	0.02778	0.01628	Slc1a3/Slc2a1/Slc6a1	3
DCN	CD_vs_HC	CD up	GO:0010332	response to gamma radiation	2/27	50/28891	0.001002	0.02874	0.01684	Cdkn1a/Egr1	2
DCN	CD_vs_HC	CD up	GO:0007519	skeletal muscle tissue development	3/27	215/28891	0.001042	0.02885	0.0169	Egr1/Fos/S100b	3
DCN	CD_vs_HC	CD up	GO:0071385	cellular response to glucocorticoid stimulus	2/27	53/28891	0.001125	0.02915	0.01708	Fam107a/Npas4	2
DCN	CD_vs_HC	CD up	GO:1902895	positive regulation of miRNA transcription	2/27	53/28891	0.001125	0.02915	0.01708	Egr1/Fos	2
DCN	CD_vs_HC	CD up	GO:0033673	negative regulation of kinase activity	3/27	225/28891	0.001187	0.02964	0.01737	Cdkn1a/Dbndd2/Dusp1	3
DCN	CD_vs_HC	CD up	GO:0060538	skeletal muscle organ development	3/27	227/28891	0.001218	0.02964	0.01737	Egr1/Fos/S100b	3
DCN	CD_vs_HC	CD up	GO:1900271	regulation of long-term synaptic potentiation	2/27	59/28891	0.001393	0.0315	0.01846	Calb1/Fam107a	2
DCN	CD_vs_HC	CD up	GO:2000630	positive regulation of miRNA metabolic process	2/27	59/28891	0.001393	0.0315	0.01846	Egr1/Fos	2
DCN	CD_vs_HC	CD up	GO:0031669	cellular response to nutrient levels	3/27	239/28891	0.001412	0.0315	0.01846	Cdkn1a/Fam107a/Slc2a1	3
DCN	CD_vs_HC	CD up	GO:0071384	cellular response to corticosteroid stimulus	2/27	63/28891	0.001586	0.03355	0.01966	Fam107a/Npas4	2
DCN	CD_vs_HC	CD up	GO:1903320	regulation of protein modification by small protein conjugation or removal	3/27	249/28891	0.001588	0.03355	0.01966	Egr1/Fam107a/Ivns1abp	3
DCN	CD_vs_HC	CD up	GO:0071241	cellular response to inorganic substance	3/27	258/28891	0.001757	0.03518	0.02061	Fos/Junb/Mt2	3
DCN	CD_vs_HC	CD up	GO:1902476	chloride transmembrane transport	2/27	67/28891	0.001791	0.03518	0.02061	Slc1a3/Slc6a1	2
DCN	CD_vs_HC	CD up	GO:0051348	negative regulation of transferase activity	3/27	260/28891	0.001796	0.03518	0.02061	Cdkn1a/Dbndd2/Dusp1	3
DCN	CD_vs_HC	CD up	GO:2000134	negative regulation of G1/S transition of mitotic cell cycle	2/27	68/28891	0.001844	0.03526	0.02066	Cdkn1a/Fam107a	2
DCN	CD_vs_HC	CD up	GO:0051932	synaptic transmission, GABAergic	2/27	69/28891	0.001898	0.03545	0.02077	Npas4/Slc6a1	2
DCN	CD_vs_HC	CD up	GO:0071479	cellular response to ionizing radiation	2/27	72/28891	0.002065	0.03704	0.0217	Cdkn1a/Egr1	2
DCN	CD_vs_HC	CD up	GO:0048168	regulation of neuronal synaptic plasticity	2/27	73/28891	0.002122	0.03704	0.0217	Egr1/S100b	2
DCN	CD_vs_HC	CD up	GO:1902893	regulation of miRNA transcription	2/27	73/28891	0.002122	0.03704	0.0217	Egr1/Fos	2
DCN	CD_vs_HC	CD up	GO:0015800	acidic amino acid transport	2/27	74/28891	0.002179	0.03724	0.02182	Slc1a3/Slc6a1	2
DCN	CD_vs_HC	CD up	GO:0061614	miRNA transcription	2/27	75/28891	0.002238	0.03744	0.02194	Egr1/Fos	2
DCN	CD_vs_HC	CD up	GO:1902807	negative regulation of cell cycle G1/S phase transition	2/27	76/28891	0.002297	0.03764	0.02206	Cdkn1a/Fam107a	2
DCN	CD_vs_HC	CD up	GO:1901873	regulation of post-translational protein modification	3/27	295/28891	0.002571	0.04129	0.02419	Egr1/Fam107a/Ivns1abp	3
DCN	CD_vs_HC	CD up	GO:0032722	positive regulation of chemokine production	2/27	86/28891	0.002929	0.04385	0.0257	Egr1/Mbp	2
DCN	CD_vs_HC	CD up	GO:0046323	glucose import	2/27	88/28891	0.003064	0.04385	0.0257	Adipor2/Slc2a1	2
DCN	CD_vs_HC	CD up	GO:2000628	regulation of miRNA metabolic process	2/27	88/28891	0.003064	0.04385	0.0257	Egr1/Fos	2
DCN	CD_vs_HC	CD up	GO:0007162	negative regulation of cell adhesion	3/27	315/28891	0.003093	0.04385	0.0257	Dusp1/Fam107a/Mbp	3
DCN	CD_vs_HC	CD up	GO:0098661	inorganic anion transmembrane transport	2/27	90/28891	0.003202	0.04385	0.0257	Slc1a3/Slc6a1	2
DCN	CD_vs_HC	CD up	GO:0010038	response to metal ion	3/27	320/28891	0.003233	0.04385	0.0257	Fos/Junb/Mt2	3
DCN	CD_vs_HC	CD up	GO:0001656	metanephros development	2/27	91/28891	0.003272	0.04385	0.0257	Calb1/Egr1	2
DCN	CD_vs_HC	CD up	GO:0071277	cellular response to calcium ion	2/27	91/28891	0.003272	0.04385	0.0257	Fos/Junb	2
DCN	CD_vs_HC	CD up	GO:0098656	monoatomic anion transmembrane transport	2/27	92/28891	0.003343	0.04385	0.0257	Slc1a3/Slc6a1	2
DCN	CD_vs_HC	CD up	GO:0050848	regulation of calcium-mediated signaling	2/27	93/28891	0.003414	0.04385	0.0257	Car8/Itpr1	2
DCN	CD_vs_HC	CD up	GO:0006874	intracellular calcium ion homeostasis	3/27	327/28891	0.003436	0.04385	0.0257	Calb1/Itpr1/S100b	3
DCN	CD_vs_HC	CD up	GO:0097193	intrinsic apoptotic signaling pathway	3/27	327/28891	0.003436	0.04385	0.0257	Cdkn1a/Itpr1/Ivns1abp	3
DCN	CD_vs_HC	CD up	GO:0019932	second-messenger-mediated signaling	3/27	328/28891	0.003465	0.04385	0.0257	Car8/Itpr1/Mt2	3
DCN	CD_vs_HC	CD up	GO:0009416	response to light stimulus	3/27	329/28891	0.003495	0.04385	0.0257	Cdkn1a/Pcp2/Slc1a3	3
DCN	CD_vs_HC	CD up	GO:0140747	regulation of ncRNA transcription	2/27	95/28891	0.00356	0.04397	0.02577	Egr1/Fos	2
DCN	CD_vs_HC	CD up	GO:0051384	response to glucocorticoid	2/27	96/28891	0.003633	0.0442	0.0259	Fam107a/Npas4	2
DCN	CD_vs_HC	CD up	GO:0071214	cellular response to abiotic stimulus	3/27	340/28891	0.003833	0.04526	0.02652	Cdkn1a/Egr1/Pcp2	3
DCN	CD_vs_HC	CD up	GO:0104004	cellular response to environmental stimulus	3/27	340/28891	0.003833	0.04526	0.02652	Cdkn1a/Egr1/Pcp2	3
DCN	CD_vs_HC	CD up	GO:0001933	negative regulation of protein phosphorylation	3/27	342/28891	0.003896	0.04534	0.02657	Cdkn1a/Dbndd2/Dusp1	3
DCN	CD_vs_HC	CD up	GO:0010586	miRNA metabolic process	2/27	104/28891	0.004248	0.04814	0.02821	Egr1/Fos	2
DCN	CD_vs_HC	CD up	GO:0055074	calcium ion homeostasis	3/27	353/28891	0.004256	0.04814	0.02821	Calb1/Itpr1/S100b	3
DCN	CD_vs_HC	CD up	GO:0046942	carboxylic acid transport	3/27	362/28891	0.004565	0.04941	0.02895	Slc1a3/Slc2a1/Slc6a1	3
DCN	CD_vs_HC	CD up	GO:0015849	organic acid transport	3/27	364/28891	0.004636	0.04941	0.02895	Slc1a3/Slc2a1/Slc6a1	3
DCN	CD_vs_HC	CD up	GO:0071901	negative regulation of protein serine/threonine kinase activity	2/27	109/28891	0.004655	0.04941	0.02895	Cdkn1a/Dusp1	2
DCN	CD_vs_HC	CD up	GO:0006821	chloride transport	2/27	110/28891	0.004738	0.04941	0.02895	Slc1a3/Slc6a1	2
DCN	CD_vs_HC	CD up	GO:0007200	phospholipase C-activating G protein-coupled receptor signaling pathway	2/27	110/28891	0.004738	0.04941	0.02895	Gng13/Itpr1	2
DCN	CD_vs_HC	CD up	GO:0031960	response to corticosteroid	2/27	110/28891	0.004738	0.04941	0.02895	Fam107a/Npas4	2
DCN	CD_vs_HC	CD down	GO:0002181	cytoplasmic translation	7/32	148/28891	2.426e-10	1.599e-07	1.208e-07	Rpl17/Rpl32/Rpl34/Rpl41/Rpl9/Rps15a/Rps8	7
DCN	CD_vs_HC	CD down	GO:0140236	translation at presynapse	5/32	47/28891	1.783e-09	3.276e-07	2.475e-07	Rpl17/Rpl32/Rpl34/Rpl9/Rps15a	5
DCN	CD_vs_HC	CD down	GO:0140241	translation at synapse	5/32	48/28891	1.989e-09	3.276e-07	2.475e-07	Rpl17/Rpl32/Rpl34/Rpl9/Rps15a	5
DCN	CD_vs_HC	CD down	GO:0140242	translation at postsynapse	5/32	48/28891	1.989e-09	3.276e-07	2.475e-07	Rpl17/Rpl32/Rpl34/Rpl9/Rps15a	5
Fourth_ventricle	CD_vs_HC	CD up	GO:0035524	proline transmembrane transport	1/2	11/28891	0.0007614	0.008824		Slc6a20a	1
Fourth_ventricle	CD_vs_HC	CD up	GO:0015838	amino-acid betaine transport	1/2	12/28891	0.0008306	0.008824		Slc6a20a	1
Fourth_ventricle	CD_vs_HC	CD up	GO:0015824	proline transport	1/2	14/28891	0.0009689	0.008824		Slc6a20a	1
Fourth_ventricle	CD_vs_HC	CD up	GO:0015816	glycine transport	1/2	15/28891	0.001038	0.008824		Slc6a20a	1
Fourth_ventricle	CD_vs_HC	CD up	GO:0015697	quaternary ammonium group transport	1/2	34/28891	0.002352	0.016		Slc6a20a	1
Fourth_ventricle	CD_vs_HC	CD up	GO:0072337	modified amino acid transport	1/2	45/28891	0.003113	0.01617		Slc6a20a	1
Fourth_ventricle	CD_vs_HC	CD up	GO:0015804	neutral amino acid transport	1/2	54/28891	0.003735	0.01617		Slc6a20a	1
Fourth_ventricle	CD_vs_HC	CD up	GO:0089718	amino acid import across plasma membrane	1/2	55/28891	0.003804	0.01617		Slc6a20a	1
Fourth_ventricle	CD_vs_HC	CD up	GO:1902475	L-alpha-amino acid transmembrane transport	1/2	70/28891	0.00484	0.01678		Slc6a20a	1
Fourth_ventricle	CD_vs_HC	CD up	GO:0031397	negative regulation of protein ubiquitination	1/2	81/28891	0.0056	0.01678		Ivns1abp	1
Fourth_ventricle	CD_vs_HC	CD up	GO:0015807	L-amino acid transport	1/2	88/28891	0.006083	0.01678		Slc6a20a	1
Fourth_ventricle	CD_vs_HC	CD up	GO:1903321	negative regulation of protein modification by small protein conjugation or removal	1/2	92/28891	0.006359	0.01678		Ivns1abp	1
Fourth_ventricle	CD_vs_HC	CD up	GO:1901874	negative regulation of post-translational protein modification	1/2	98/28891	0.006773	0.01678		Ivns1abp	1
Fourth_ventricle	CD_vs_HC	CD up	GO:0003333	amino acid transmembrane transport	1/2	100/28891	0.006911	0.01678		Slc6a20a	1
Fourth_ventricle	CD_vs_HC	CD up	GO:2001243	negative regulation of intrinsic apoptotic signaling pathway	1/2	110/28891	0.0076	0.01723		Ivns1abp	1
Fourth_ventricle	CD_vs_HC	CD up	GO:1905039	carboxylic acid transmembrane transport	1/2	144/28891	0.009944	0.02003		Slc6a20a	1
Fourth_ventricle	CD_vs_HC	CD up	GO:1903825	organic acid transmembrane transport	1/2	145/28891	0.01001	0.02003		Slc6a20a	1
Fourth_ventricle	CD_vs_HC	CD up	GO:0035725	sodium ion transmembrane transport	1/2	169/28891	0.01167	0.021		Slc6a20a	1
Fourth_ventricle	CD_vs_HC	CD up	GO:0006865	amino acid transport	1/2	170/28891	0.01173	0.021		Slc6a20a	1
Fourth_ventricle	CD_vs_HC	CD up	GO:2001242	regulation of intrinsic apoptotic signaling pathway	1/2	194/28891	0.01338	0.0227		Ivns1abp	1
Fourth_ventricle	CD_vs_HC	CD up	GO:0098739	import across plasma membrane	1/2	207/28891	0.01428	0.0227		Slc6a20a	1
Fourth_ventricle	CD_vs_HC	CD up	GO:0031396	regulation of protein ubiquitination	1/2	213/28891	0.01469	0.0227		Ivns1abp	1
Fourth_ventricle	CD_vs_HC	CD up	GO:1903320	regulation of protein modification by small protein conjugation or removal	1/2	249/28891	0.01716	0.02456		Ivns1abp	1
Fourth_ventricle	CD_vs_HC	CD up	GO:2001234	negative regulation of apoptotic signaling pathway	1/2	253/28891	0.01744	0.02456		Ivns1abp	1
Fourth_ventricle	CD_vs_HC	CD up	GO:0006814	sodium ion transport	1/2	262/28891	0.01806	0.02456		Slc6a20a	1
Fourth_ventricle	CD_vs_HC	CD up	GO:1901873	regulation of post-translational protein modification	1/2	295/28891	0.02032	0.02657		Ivns1abp	1
Fourth_ventricle	CD_vs_HC	CD up	GO:0097193	intrinsic apoptotic signaling pathway	1/2	327/28891	0.02251	0.02834		Ivns1abp	1
Fourth_ventricle	CD_vs_HC	CD up	GO:0046942	carboxylic acid transport	1/2	362/28891	0.0249	0.02936		Slc6a20a	1
Fourth_ventricle	CD_vs_HC	CD up	GO:0015849	organic acid transport	1/2	364/28891	0.02504	0.02936		Slc6a20a	1
Fourth_ventricle	CD_vs_HC	CD up	GO:0009615	response to virus	1/2	389/28891	0.02675	0.03031		Ivns1abp	1
Fourth_ventricle	CD_vs_HC	CD up	GO:0015711	organic anion transport	1/2	436/28891	0.02996	0.03178		Slc6a20a	1
Fourth_ventricle	CD_vs_HC	CD up	GO:2001233	regulation of apoptotic signaling pathway	1/2	437/28891	0.03002	0.03178		Ivns1abp	1
Fourth_ventricle	CD_vs_HC	CD up	GO:0008380	RNA splicing	1/2	449/28891	0.03084	0.03178		Ivns1abp	1
Fourth_ventricle	CD_vs_HC	CD up	GO:0031400	negative regulation of protein modification process	1/2	473/28891	0.03248	0.03248		Ivns1abp	1
Fourth_ventricle	CD_vs_HC	CD down	GO:0045834	positive regulation of lipid metabolic process	2/5	185/28891	0.0004027	0.03181	0.006572	Eef1a2/Gh	2
Fourth_ventricle	CD_vs_HC	CD down	GO:0061351	neural precursor cell proliferation	2/5	225/28891	0.0005946	0.03181	0.006572	Gh/Trnp1	2
Fourth_ventricle	CD_vs_HC	CD down	GO:0070305	response to cGMP	1/5	10/28891	0.00173	0.03688	0.007619	Hcn2	1
Fourth_ventricle	CD_vs_HC	CD down	GO:0019216	regulation of lipid metabolic process	2/5	398/28891	0.001842	0.03688	0.007619	Eef1a2/Gh	2
Fourth_ventricle	CD_vs_HC	CD down	GO:0046886	positive regulation of hormone biosynthetic process	1/5	14/28891	0.002421	0.03688	0.007619	Gh	1
Fourth_ventricle	CD_vs_HC	CD down	GO:0060396	growth hormone receptor signaling pathway	1/5	19/28891	0.003284	0.03688	0.007619	Gh	1
Fourth_ventricle	CD_vs_HC	CD down	GO:0071378	cellular response to growth hormone stimulus	1/5	19/28891	0.003284	0.03688	0.007619	Gh	1
Fourth_ventricle	CD_vs_HC	CD down	GO:0090030	regulation of steroid hormone biosynthetic process	1/5	20/28891	0.003457	0.03688	0.007619	Gh	1
Fourth_ventricle	CD_vs_HC	CD down	GO:0060416	response to growth hormone	1/5	21/28891	0.003629	0.03688	0.007619	Gh	1
Fourth_ventricle	CD_vs_HC	CD down	GO:0098719	sodium ion import across plasma membrane	1/5	22/28891	0.003802	0.03688	0.007619	Hcn2	1
Fourth_ventricle	CD_vs_HC	CD down	GO:0032352	positive regulation of hormone metabolic process	1/5	25/28891	0.004319	0.03688	0.007619	Gh	1
Fourth_ventricle	CD_vs_HC	CD down	GO:0010893	positive regulation of steroid biosynthetic process	1/5	29/28891	0.005009	0.03688	0.007619	Gh	1
Fourth_ventricle	CD_vs_HC	CD down	GO:0046885	regulation of hormone biosynthetic process	1/5	30/28891	0.005182	0.03688	0.007619	Gh	1
Fourth_ventricle	CD_vs_HC	CD down	GO:0090218	positive regulation of lipid kinase activity	1/5	30/28891	0.005182	0.03688	0.007619	Eef1a2	1
Fourth_ventricle	CD_vs_HC	CD down	GO:0032104	regulation of response to extracellular stimulus	1/5	37/28891	0.006387	0.03688	0.007619	Gh	1
Fourth_ventricle	CD_vs_HC	CD down	GO:0032107	regulation of response to nutrient levels	1/5	37/28891	0.006387	0.03688	0.007619	Gh	1
Fourth_ventricle	CD_vs_HC	CD down	GO:0045940	positive regulation of steroid metabolic process	1/5	39/28891	0.006732	0.03688	0.007619	Gh	1
Fourth_ventricle	CD_vs_HC	CD down	GO:0071320	cellular response to cAMP	1/5	39/28891	0.006732	0.03688	0.007619	Hcn2	1
Fourth_ventricle	CD_vs_HC	CD down	GO:0032094	response to food	1/5	40/28891	0.006904	0.03688	0.007619	Gh	1
Fourth_ventricle	CD_vs_HC	CD down	GO:0040018	positive regulation of multicellular organism growth	1/5	42/28891	0.007248	0.03688	0.007619	Gh	1
Fourth_ventricle	CD_vs_HC	CD down	GO:0043550	regulation of lipid kinase activity	1/5	45/28891	0.007764	0.03688	0.007619	Eef1a2	1
Fourth_ventricle	CD_vs_HC	CD down	GO:0021696	cerebellar cortex morphogenesis	1/5	47/28891	0.008108	0.03688	0.007619	Trnp1	1
Fourth_ventricle	CD_vs_HC	CD down	GO:1990573	potassium ion import across plasma membrane	1/5	47/28891	0.008108	0.03688	0.007619	Hcn2	1
Fourth_ventricle	CD_vs_HC	CD down	GO:0003254	regulation of membrane depolarization	1/5	53/28891	0.009139	0.03688	0.007619	Hcn2	1
Fourth_ventricle	CD_vs_HC	CD down	GO:0010828	positive regulation of glucose transmembrane transport	1/5	56/28891	0.009655	0.03688	0.007619	Gh	1
Fourth_ventricle	CD_vs_HC	CD down	GO:0042531	positive regulation of tyrosine phosphorylation of STAT protein	1/5	56/28891	0.009655	0.03688	0.007619	Gh	1
Fourth_ventricle	CD_vs_HC	CD down	GO:0032350	regulation of hormone metabolic process	1/5	57/28891	0.009826	0.03688	0.007619	Gh	1
Fourth_ventricle	CD_vs_HC	CD down	GO:0021587	cerebellum morphogenesis	1/5	58/28891	0.009998	0.03688	0.007619	Trnp1	1
Fourth_ventricle	CD_vs_HC	CD down	GO:0021575	hindbrain morphogenesis	1/5	62/28891	0.01068	0.03688	0.007619	Trnp1	1
Fourth_ventricle	CD_vs_HC	CD down	GO:0042446	hormone biosynthetic process	1/5	62/28891	0.01068	0.03688	0.007619	Gh	1
Fourth_ventricle	CD_vs_HC	CD down	GO:0051591	response to cAMP	1/5	62/28891	0.01068	0.03688	0.007619	Hcn2	1
Fourth_ventricle	CD_vs_HC	CD down	GO:0048286	lung alveolus development	1/5	68/28891	0.01171	0.03734	0.007715	Gh	1
Fourth_ventricle	CD_vs_HC	CD down	GO:0046427	positive regulation of receptor signaling pathway via JAK-STAT	1/5	70/28891	0.01206	0.03734	0.007715	Gh	1
Fourth_ventricle	CD_vs_HC	CD down	GO:0021695	cerebellar cortex development	1/5	71/28891	0.01223	0.03734	0.007715	Trnp1	1
Fourth_ventricle	CD_vs_HC	CD down	GO:0042509	regulation of tyrosine phosphorylation of STAT protein	1/5	71/28891	0.01223	0.03734	0.007715	Gh	1
Fourth_ventricle	CD_vs_HC	CD down	GO:0007260	tyrosine phosphorylation of STAT protein	1/5	75/28891	0.01291	0.03734	0.007715	Gh	1
Fourth_ventricle	CD_vs_HC	CD down	GO:1904894	positive regulation of receptor signaling pathway via STAT	1/5	75/28891	0.01291	0.03734	0.007715	Gh	1
Fourth_ventricle	CD_vs_HC	CD down	GO:0033143	regulation of intracellular steroid hormone receptor signaling pathway	1/5	80/28891	0.01377	0.03877	0.00801	Gh	1
Fourth_ventricle	CD_vs_HC	CD down	GO:0040014	regulation of multicellular organism growth	1/5	89/28891	0.01531	0.04006	0.008276	Gh	1
Fourth_ventricle	CD_vs_HC	CD down	GO:0010827	regulation of glucose transmembrane transport	1/5	92/28891	0.01582	0.04006	0.008276	Gh	1
Fourth_ventricle	CD_vs_HC	CD down	GO:0006414	translational elongation	1/5	96/28891	0.01651	0.04006	0.008276	Eef1a2	1
Fourth_ventricle	CD_vs_HC	CD down	GO:0050810	regulation of steroid biosynthetic process	1/5	96/28891	0.01651	0.04006	0.008276	Gh	1
Fourth_ventricle	CD_vs_HC	CD down	GO:0051899	membrane depolarization	1/5	97/28891	0.01668	0.04006	0.008276	Hcn2	1
Fourth_ventricle	CD_vs_HC	CD down	GO:0007405	neuroblast proliferation	1/5	98/28891	0.01685	0.04006	0.008276	Gh	1
Fourth_ventricle	CD_vs_HC	CD down	GO:0046683	response to organophosphorus	1/5	98/28891	0.01685	0.04006	0.008276	Hcn2	1
Fourth_ventricle	CD_vs_HC	CD down	GO:0021549	cerebellum development	1/5	113/28891	0.01941	0.0409	0.00845	Trnp1	1
Fourth_ventricle	CD_vs_HC	CD down	GO:0046889	positive regulation of lipid biosynthetic process	1/5	114/28891	0.01958	0.0409	0.00845	Gh	1
Fourth_ventricle	CD_vs_HC	CD down	GO:0014074	response to purine-containing compound	1/5	116/28891	0.01992	0.0409	0.00845	Hcn2	1
Fourth_ventricle	CD_vs_HC	CD down	GO:0030518	intracellular steroid hormone receptor signaling pathway	1/5	118/28891	0.02026	0.0409	0.00845	Gh	1
Fourth_ventricle	CD_vs_HC	CD down	GO:1904659	glucose transmembrane transport	1/5	119/28891	0.02043	0.0409	0.00845	Gh	1
Fourth_ventricle	CD_vs_HC	CD down	GO:0008645	hexose transmembrane transport	1/5	120/28891	0.0206	0.0409	0.00845	Gh	1
Fourth_ventricle	CD_vs_HC	CD down	GO:0015749	monosaccharide transmembrane transport	1/5	123/28891	0.02111	0.0409	0.00845	Gh	1
Fourth_ventricle	CD_vs_HC	CD down	GO:0019218	regulation of steroid metabolic process	1/5	123/28891	0.02111	0.0409	0.00845	Gh	1
Fourth_ventricle	CD_vs_HC	CD down	GO:0043401	steroid hormone mediated signaling pathway	1/5	123/28891	0.02111	0.0409	0.00845	Gh	1
Fourth_ventricle	CD_vs_HC	CD down	GO:0098659	inorganic cation import across plasma membrane	1/5	125/28891	0.02145	0.0409	0.00845	Hcn2	1
Fourth_ventricle	CD_vs_HC	CD down	GO:0099587	inorganic ion import across plasma membrane	1/5	125/28891	0.02145	0.0409	0.00845	Hcn2	1
Fourth_ventricle	CD_vs_HC	CD down	GO:0022037	metencephalon development	1/5	127/28891	0.02179	0.0409	0.00845	Trnp1	1
Fourth_ventricle	CD_vs_HC	CD down	GO:0034219	carbohydrate transmembrane transport	1/5	132/28891	0.02264	0.04176	0.008628	Gh	1
Fourth_ventricle	CD_vs_HC	CD down	GO:0046425	regulation of receptor signaling pathway via JAK-STAT	1/5	138/28891	0.02366	0.0429	0.008864	Gh	1
Fourth_ventricle	CD_vs_HC	CD down	GO:1904892	regulation of receptor signaling pathway via STAT	1/5	146/28891	0.02502	0.04461	0.009216	Gh	1
Fourth_ventricle	CD_vs_HC	CD down	GO:0008643	carbohydrate transport	1/5	160/28891	0.02739	0.04804	0.009925	Gh	1
Fourth_ventricle	CD_vs_HC	CD down	GO:0009755	hormone-mediated signaling pathway	1/5	168/28891	0.02874	0.0491	0.01014	Gh	1
Fourth_ventricle	CD_vs_HC	CD down	GO:0035725	sodium ion transmembrane transport	1/5	169/28891	0.02891	0.0491	0.01014	Hcn2	1
Granular_layer	CD_vs_HC	CD up	GO:0019932	second-messenger-mediated signaling	4/12	328/28891	7.514e-06	0.001447	0.0007467	Car8/Itpr1/Mt1/Mt2	4
Granular_layer	CD_vs_HC	CD up	GO:0097501	stress response to metal ion	2/12	13/28891	1.23e-05	0.001447	0.0007467	Mt1/Mt2	2
Granular_layer	CD_vs_HC	CD up	GO:0061687	detoxification of inorganic compound	2/12	14/28891	1.435e-05	0.001447	0.0007467	Mt1/Mt2	2
Granular_layer	CD_vs_HC	CD up	GO:0071294	cellular response to zinc ion	2/12	16/28891	1.892e-05	0.001447	0.0007467	Mt1/Mt2	2
Granular_layer	CD_vs_HC	CD up	GO:0071280	cellular response to copper ion	2/12	18/28891	2.411e-05	0.001475	0.0007613	Mt1/Mt2	2
Granular_layer	CD_vs_HC	CD up	GO:0006882	intracellular zinc ion homeostasis	2/12	28/28891	5.942e-05	0.002384	0.00123	Mt1/Mt2	2
Granular_layer	CD_vs_HC	CD up	GO:0071276	cellular response to cadmium ion	2/12	28/28891	5.942e-05	0.002384	0.00123	Mt1/Mt2	2
Granular_layer	CD_vs_HC	CD up	GO:0046688	response to copper ion	2/12	29/28891	6.381e-05	0.002384	0.00123	Mt1/Mt2	2
Granular_layer	CD_vs_HC	CD up	GO:1902075	cellular response to salt	3/12	202/28891	7.072e-05	0.002384	0.00123	Itpr1/Mt1/Slc1a3	3
Granular_layer	CD_vs_HC	CD up	GO:0007263	nitric oxide mediated signal transduction	2/12	32/28891	7.79e-05	0.002384	0.00123	Mt1/Mt2	2
Granular_layer	CD_vs_HC	CD up	GO:0010043	response to zinc ion	2/12	38/28891	0.0001103	0.003067	0.001583	Mt1/Mt2	2
Granular_layer	CD_vs_HC	CD up	GO:0046686	response to cadmium ion	2/12	40/28891	0.0001223	0.003118	0.001609	Mt1/Mt2	2
Granular_layer	CD_vs_HC	CD up	GO:1902074	response to salt	3/12	343/28891	0.000337	0.007933	0.004094	Itpr1/Mt1/Slc1a3	3
Granular_layer	CD_vs_HC	CD up	GO:0098754	detoxification	2/12	71/28891	0.0003868	0.008454	0.004362	Mt1/Mt2	2
Granular_layer	CD_vs_HC	CD up	GO:0042886	amide transport	3/12	432/28891	0.0006606	0.01267	0.006538	Itpr1/Slc15a2/Slc1a3	3
Granular_layer	CD_vs_HC	CD up	GO:0050848	regulation of calcium-mediated signaling	2/12	93/28891	0.0006625	0.01267	0.006538	Car8/Itpr1	2
Granular_layer	CD_vs_HC	CD up	GO:0007200	phospholipase C-activating G protein-coupled receptor signaling pathway	2/12	110/28891	0.0009248	0.01665	0.008589	Gng13/Itpr1	2
Granular_layer	CD_vs_HC	CD up	GO:0009636	response to toxic substance	2/12	136/28891	0.001408	0.02393	0.01235	Mt1/Mt2	2
Granular_layer	CD_vs_HC	CD up	GO:0071248	cellular response to metal ion	2/12	187/28891	0.002635	0.04244	0.0219	Mt1/Mt2	2
Granular_layer	CD_vs_HC	CD up	GO:0050905	neuromuscular process	2/12	204/28891	0.003125	0.04376	0.02258	Itpr1/Slc1a3	2
Granular_layer	CD_vs_HC	CD up	GO:0098739	import across plasma membrane	2/12	207/28891	0.003216	0.04376	0.02258	Slc15a2/Slc1a3	2
Granular_layer	CD_vs_HC	CD up	GO:0043524	negative regulation of neuron apoptotic process	2/12	210/28891	0.003308	0.04376	0.02258	Mt1/Pcp4	2
Granular_layer	CD_vs_HC	CD up	GO:0031396	regulation of protein ubiquitination	2/12	213/28891	0.003401	0.04376	0.02258	Fam107a/Ivns1abp	2
Granular_layer	CD_vs_HC	CD up	GO:0019722	calcium-mediated signaling	2/12	214/28891	0.003432	0.04376	0.02258	Car8/Itpr1	2
Granular_layer	CD_vs_HC	CD up	GO:0007207	phospholipase C-activating G protein-coupled acetylcholine receptor signaling pathway	1/12	10/28891	0.004146	0.04553	0.02349	Itpr1	1
Granular_layer	CD_vs_HC	CD up	GO:0033603	positive regulation of dopamine secretion	1/12	10/28891	0.004146	0.04553	0.02349	Pcp4	1
Granular_layer	CD_vs_HC	CD up	GO:0010976	positive regulation of neuron projection development	2/12	239/28891	0.004259	0.04553	0.02349	Itpr1/Pcp4	2
Granular_layer	CD_vs_HC	CD up	GO:0030388	fructose 1,6-bisphosphate metabolic process	1/12	11/28891	0.00456	0.04553	0.02349	Aldoc	1
Granular_layer	CD_vs_HC	CD up	GO:0042045	epithelial fluid transport	1/12	11/28891	0.00456	0.04553	0.02349	Itpr1	1
Granular_layer	CD_vs_HC	CD up	GO:0070424	regulation of nucleotide-binding oligomerization domain containing signaling pathway	1/12	11/28891	0.00456	0.04553	0.02349	Slc15a2	1
Granular_layer	CD_vs_HC	CD up	GO:1903320	regulation of protein modification by small protein conjugation or removal	2/12	249/28891	0.004613	0.04553	0.02349	Fam107a/Ivns1abp	2
Granular_layer	CD_vs_HC	CD up	GO:0071241	cellular response to inorganic substance	2/12	258/28891	0.004942	0.04579	0.02363	Mt1/Mt2	2
Granular_layer	CD_vs_HC	CD up	GO:0099105	ion channel modulating, G protein-coupled receptor signaling pathway	1/12	12/28891	0.004974	0.04579	0.02363	Itpr1	1
Granular_layer	CD_vs_HC	CD up	GO:0031223	auditory behavior	1/12	13/28891	0.005387	0.04579	0.02363	Slc1a3	1
Granular_layer	CD_vs_HC	CD up	GO:0097421	liver regeneration	1/12	13/28891	0.005387	0.04579	0.02363	Itpr1	1
Granular_layer	CD_vs_HC	CD up	GO:1900272	negative regulation of long-term synaptic potentiation	1/12	13/28891	0.005387	0.04579	0.02363	Fam107a	1
Granular_layer	CD_vs_HC	CD up	GO:2000347	positive regulation of hepatocyte proliferation	1/12	14/28891	0.005801	0.04797	0.02475	Itpr1	1
Granular_layer	CD_vs_HC	CD up	GO:1901873	regulation of post-translational protein modification	2/12	295/28891	0.00641	0.04828	0.02491	Fam107a/Ivns1abp	2
Granular_layer	CD_vs_HC	CD up	GO:0007638	mechanosensory behavior	1/12	16/28891	0.006627	0.04828	0.02491	Slc1a3	1
Granular_layer	CD_vs_HC	CD up	GO:0051895	negative regulation of focal adhesion assembly	1/12	16/28891	0.006627	0.04828	0.02491	Fam107a	1
Granular_layer	CD_vs_HC	CD up	GO:0099004	calmodulin dependent kinase signaling pathway	1/12	16/28891	0.006627	0.04828	0.02491	Pcp4	1
Granular_layer	CD_vs_HC	CD up	GO:0150118	negative regulation of cell-substrate junction organization	1/12	16/28891	0.006627	0.04828	0.02491	Fam107a	1
Granular_layer	CD_vs_HC	CD up	GO:0098712	L-glutamate import across plasma membrane	1/12	17/28891	0.00704	0.04906	0.02532	Slc1a3	1
Granular_layer	CD_vs_HC	CD up	GO:0043523	regulation of neuron apoptotic process	2/12	310/28891	0.007055	0.04906	0.02532	Mt1/Pcp4	2
Granular_layer	CD_vs_HC	CD down	GO:0090218	positive regulation of lipid kinase activity	1/1	30/28891	0.001038	0.004673		Eef1a2	1
Granular_layer	CD_vs_HC	CD down	GO:0043550	regulation of lipid kinase activity	1/1	45/28891	0.001558	0.004673		Eef1a2	1
Granular_layer	CD_vs_HC	CD down	GO:0006414	translational elongation	1/1	96/28891	0.003323	0.006646		Eef1a2	1
Granular_layer	CD_vs_HC	CD down	GO:0045834	positive regulation of lipid metabolic process	1/1	185/28891	0.006403	0.009605		Eef1a2	1
Granular_layer	CD_vs_HC	CD down	GO:0019216	regulation of lipid metabolic process	1/1	398/28891	0.01378	0.01475		Eef1a2	1
Granular_layer	CD_vs_HC	CD down	GO:0033674	positive regulation of kinase activity	1/1	426/28891	0.01475	0.01475		Eef1a2	1
Medulla	CD_vs_HC	CD up	GO:0050806	positive regulation of synaptic transmission	15/105	348/28891	2.523e-12	5.285e-09	3.8e-09	Adcyap1/Baiap3/Bcl2l1/Camk2b/Fam107a/Hap1/S100b/Shank2/Shank3/Slc1a3/Slc24a2/Snca/Syt1/Tac1/Vamp2	15
Medulla	CD_vs_HC	CD up	GO:0006836	neurotransmitter transport	11/105	230/28891	8.278e-10	8.671e-07	6.234e-07	Baiap3/Bcl2l1/Cplx2/Npy/Slc17a7/Slc6a17/Snca/Sncg/Syt1/Unc13c/Vamp2	11
Medulla	CD_vs_HC	CD up	GO:0099003	vesicle-mediated transport in synapse	11/105	270/28891	4.443e-09	3.103e-06	2.231e-06	Atp6v0a1/Bcl2l1/Cplx2/Hap1/Npy/Slc17a7/Snca/Sncg/Syt1/Unc13c/Vamp2	11
Medulla	CD_vs_HC	CD up	GO:0001505	regulation of neurotransmitter levels	10/105	220/28891	8.203e-09	4.296e-06	3.089e-06	Baiap3/Bcl2l1/Cplx2/Npy/Slc17a7/Snca/Sncg/Syt1/Unc13c/Vamp2	10
Medulla	CD_vs_HC	CD up	GO:0099504	synaptic vesicle cycle	10/105	230/28891	1.253e-08	4.64e-06	3.336e-06	Atp6v0a1/Bcl2l1/Cplx2/Npy/Slc17a7/Snca/Sncg/Syt1/Unc13c/Vamp2	10
Medulla	CD_vs_HC	CD up	GO:0007269	neurotransmitter secretion	9/105	174/28891	1.55e-08	4.64e-06	3.336e-06	Baiap3/Bcl2l1/Cplx2/Npy/Snca/Sncg/Syt1/Unc13c/Vamp2	9
Medulla	CD_vs_HC	CD up	GO:0099643	signal release from synapse	9/105	174/28891	1.55e-08	4.64e-06	3.336e-06	Baiap3/Bcl2l1/Cplx2/Npy/Snca/Sncg/Syt1/Unc13c/Vamp2	9
Medulla	CD_vs_HC	CD up	GO:0046928	regulation of neurotransmitter secretion	7/105	106/28891	1.241e-07	3.25e-05	2.336e-05	Baiap3/Bcl2l1/Cplx2/Npy/Snca/Sncg/Syt1	7
Medulla	CD_vs_HC	CD up	GO:0017157	regulation of exocytosis	9/105	226/28891	1.466e-07	3.412e-05	2.453e-05	Baiap3/Bcl2l1/Cacna1g/Hap1/Npy/Rab3c/Snca/Syt1/Vamp2	9
Medulla	CD_vs_HC	CD up	GO:0048167	regulation of synaptic plasticity	11/105	393/28891	2.038e-07	3.792e-05	2.727e-05	Bcl2l1/Camk2b/Cplx2/Fam107a/S100b/Shank2/Shank3/Slc24a2/Snca/Unc13c/Vamp2	11
Medulla	CD_vs_HC	CD up	GO:0006887	exocytosis	11/105	395/28891	2.144e-07	3.792e-05	2.727e-05	Baiap3/Bcl2l1/Cacna1g/Cplx2/Hap1/Npy/Rab3c/Snca/Syt1/Unc13c/Vamp2	11
Medulla	CD_vs_HC	CD up	GO:0016079	synaptic vesicle exocytosis	7/105	115/28891	2.172e-07	3.792e-05	2.727e-05	Bcl2l1/Cplx2/Npy/Snca/Syt1/Unc13c/Vamp2	7
Medulla	CD_vs_HC	CD up	GO:0051588	regulation of neurotransmitter transport	7/105	126/28891	4.051e-07	6.201e-05	4.459e-05	Baiap3/Bcl2l1/Cplx2/Npy/Snca/Sncg/Syt1	7
Medulla	CD_vs_HC	CD up	GO:0048488	synaptic vesicle endocytosis	6/105	78/28891	4.144e-07	6.201e-05	4.459e-05	Bcl2l1/Slc17a7/Snca/Sncg/Syt1/Vamp2	6
Medulla	CD_vs_HC	CD up	GO:0035249	synaptic transmission, glutamatergic	7/105	129/28891	4.753e-07	6.639e-05	4.774e-05	Adcyap1/Dgkz/Shank2/Shank3/Slc17a7/Syt1/Unc13c	7
Medulla	CD_vs_HC	CD up	GO:0140238	presynaptic endocytosis	6/105	81/28891	5.19e-07	6.796e-05	4.886e-05	Bcl2l1/Slc17a7/Snca/Sncg/Syt1/Vamp2	6
Medulla	CD_vs_HC	CD up	GO:0045055	regulated exocytosis	9/105	267/28891	5.96e-07	7.345e-05	5.281e-05	Baiap3/Bcl2l1/Cacna1g/Cplx2/Npy/Snca/Syt1/Unc13c/Vamp2	9
Medulla	CD_vs_HC	CD up	GO:0016050	vesicle organization	10/105	359/28891	7.85e-07	9.136e-05	6.569e-05	Acrbp/Atp6v0a1/Baiap3/Cplx2/Ptprn/Slc17a7/Snca/Syt1/Unc13c/Vamp2	10
Medulla	CD_vs_HC	CD up	GO:0036465	synaptic vesicle recycling	6/105	90/28891	9.698e-07	0.0001069	7.688e-05	Bcl2l1/Slc17a7/Snca/Sncg/Syt1/Vamp2	6
Medulla	CD_vs_HC	CD up	GO:0001956	positive regulation of neurotransmitter secretion	4/105	24/28891	1.655e-06	0.0001733	0.0001246	Baiap3/Bcl2l1/Snca/Syt1	4
Medulla	CD_vs_HC	CD up	GO:0140029	exocytic process	6/105	104/28891	2.268e-06	0.0002263	0.0001627	Cplx2/Rab3c/Snca/Syt1/Unc13c/Vamp2	6
Medulla	CD_vs_HC	CD up	GO:0051651	maintenance of location in cell	8/105	250/28891	3.803e-06	0.0003621	0.0002604	Ank2/Fth1/Gaa/Hap1/Itpr1/Slc17a7/Snca/Sun1	8
Medulla	CD_vs_HC	CD up	GO:0051590	positive regulation of neurotransmitter transport	4/105	30/28891	4.197e-06	0.0003823	0.0002749	Baiap3/Bcl2l1/Snca/Syt1	4
Medulla	CD_vs_HC	CD up	GO:0051235	maintenance of location	9/105	373/28891	9.144e-06	0.0007747	0.000557	Ank2/Fth1/Gaa/Hap1/Itpr1/Plin3/Slc17a7/Snca/Sun1	9
Medulla	CD_vs_HC	CD up	GO:0017156	calcium-ion regulated exocytosis	5/105	77/28891	9.245e-06	0.0007747	0.000557	Baiap3/Cacna1g/Syt1/Unc13c/Vamp2	5
Medulla	CD_vs_HC	CD up	GO:0048169	regulation of long-term neuronal synaptic plasticity	4/105	37/28891	9.919e-06	0.0007992	0.0005746	Camk2b/S100b/Shank3/Snca	4
Medulla	CD_vs_HC	CD up	GO:0060292	long-term synaptic depression	4/105	39/28891	1.228e-05	0.0009531	0.0006853	Bcl2l1/Shank2/Shank3/Slc24a2	4
Medulla	CD_vs_HC	CD up	GO:1903532	positive regulation of secretion by cell	9/105	390/28891	1.303e-05	0.0009753	0.0007012	Adcyap1/Baiap3/Bcl2l1/Cacna1g/Itpr1/Pcp4/Snca/Syt1/Tac1	9
Medulla	CD_vs_HC	CD up	GO:0014059	regulation of dopamine secretion	4/105	42/28891	1.658e-05	0.001198	0.000861	Pcp4/Snca/Sncg/Syt1	4
Medulla	CD_vs_HC	CD up	GO:0051966	regulation of synaptic transmission, glutamatergic	5/105	88/28891	1.776e-05	0.00124	0.0008917	Adcyap1/Dgkz/Shank2/Shank3/Syt1	5
Medulla	CD_vs_HC	CD up	GO:0050803	regulation of synapse structure or activity	8/105	317/28891	2.132e-05	0.001441	0.001036	Camk2b/Kif1a/Lzts3/Shank2/Shank3/Slc17a7/Snca/Sparc	8
Medulla	CD_vs_HC	CD up	GO:0006874	intracellular calcium ion homeostasis	8/105	327/28891	2.66e-05	0.001742	0.001252	Ank2/Calca/Hap1/Itpr1/Npy/S100b/Slc24a2/Snca	8
Medulla	CD_vs_HC	CD up	GO:1903305	regulation of regulated secretory pathway	6/105	161/28891	2.785e-05	0.001746	0.001255	Baiap3/Bcl2l1/Cacna1g/Npy/Syt1/Vamp2	6
Medulla	CD_vs_HC	CD up	GO:0014046	dopamine secretion	4/105	48/28891	2.834e-05	0.001746	0.001255	Pcp4/Snca/Sncg/Syt1	4
Medulla	CD_vs_HC	CD up	GO:0007613	memory	6/105	164/28891	3.089e-05	0.001839	0.001322	S100b/Shank2/Shank3/Slc17a7/Slc24a2/Tac1	6
Medulla	CD_vs_HC	CD up	GO:0051047	positive regulation of secretion	9/105	437/28891	3.185e-05	0.001839	0.001322	Adcyap1/Baiap3/Bcl2l1/Cacna1g/Itpr1/Pcp4/Snca/Syt1/Tac1	9
Medulla	CD_vs_HC	CD up	GO:0003016	respiratory system process	4/105	50/28891	3.335e-05	0.001839	0.001322	Gaa/Gls/Hoxa5/Ndn	4
Medulla	CD_vs_HC	CD up	GO:0017158	regulation of calcium ion-dependent exocytosis	4/105	50/28891	3.335e-05	0.001839	0.001322	Baiap3/Cacna1g/Syt1/Vamp2	4
Medulla	CD_vs_HC	CD up	GO:0055074	calcium ion homeostasis	8/105	353/28891	4.57e-05	0.002455	0.001765	Ank2/Calca/Hap1/Itpr1/Npy/S100b/Slc24a2/Snca	8
Medulla	CD_vs_HC	CD up	GO:0060291	long-term synaptic potentiation	7/105	260/28891	4.739e-05	0.002482	0.001785	Camk2b/Fam107a/Shank2/Shank3/Slc24a2/Snca/Vamp2	7
Medulla	CD_vs_HC	CD up	GO:0006695	cholesterol biosynthetic process	4/105	59/28891	6.428e-05	0.003132	0.002252	Dhcr24/Fdps/Hmgcs1/Idi1	4
Medulla	CD_vs_HC	CD up	GO:0061001	regulation of dendritic spine morphogenesis	4/105	59/28891	6.428e-05	0.003132	0.002252	Camk2b/Kif1a/Lzts3/Shank3	4
Medulla	CD_vs_HC	CD up	GO:1902653	secondary alcohol biosynthetic process	4/105	59/28891	6.428e-05	0.003132	0.002252	Dhcr24/Fdps/Hmgcs1/Idi1	4
Medulla	CD_vs_HC	CD up	GO:0048278	vesicle docking	4/105	64/28891	8.85e-05	0.004087	0.002939	Rab3c/Syt1/Unc13c/Vamp2	4
Medulla	CD_vs_HC	CD up	GO:0051952	regulation of amine transport	5/105	123/28891	8.858e-05	0.004087	0.002939	Pcp4/Slc7a5/Snca/Sncg/Syt1	5
Medulla	CD_vs_HC	CD up	GO:0021700	developmental maturation	8/105	389/28891	8.994e-05	0.004087	0.002939	Atp6v0a1/Baiap3/Calca/Camk2b/Hoxa5/Ptprn/Slc17a7/Unc13c	8
Medulla	CD_vs_HC	CD up	GO:0015872	dopamine transport	4/105	65/28891	9.404e-05	0.004087	0.002939	Pcp4/Snca/Sncg/Syt1	4
Medulla	CD_vs_HC	CD up	GO:0016126	sterol biosynthetic process	4/105	65/28891	9.404e-05	0.004087	0.002939	Dhcr24/Fdps/Hmgcs1/Idi1	4
Medulla	CD_vs_HC	CD up	GO:0097553	calcium ion transmembrane import into cytosol	6/105	201/28891	9.559e-05	0.004087	0.002939	Ank2/Cacna1g/Hap1/Itpr1/Slc24a2/Snca	6
Medulla	CD_vs_HC	CD up	GO:0050433	regulation of catecholamine secretion	4/105	69/28891	0.0001187	0.004975	0.003577	Pcp4/Snca/Sncg/Syt1	4
Medulla	CD_vs_HC	CD up	GO:0015837	amine transport	5/105	133/28891	0.000128	0.00526	0.003782	Pcp4/Slc7a5/Snca/Sncg/Syt1	5
Medulla	CD_vs_HC	CD up	GO:0050885	neuromuscular process controlling balance	4/105	71/28891	0.0001327	0.005347	0.003845	Camk2b/Gaa/Shank3/Slc1a3	4
Medulla	CD_vs_HC	CD up	GO:0050807	regulation of synapse organization	7/105	309/28891	0.0001391	0.005434	0.003907	Camk2b/Kif1a/Lzts3/Shank2/Shank3/Snca/Sparc	7
Medulla	CD_vs_HC	CD up	GO:0016188	synaptic vesicle maturation	3/105	28/28891	0.000143	0.005434	0.003907	Atp6v0a1/Slc17a7/Unc13c	3
Medulla	CD_vs_HC	CD up	GO:0009791	post-embryonic development	5/105	137/28891	0.0001471	0.005434	0.003907	Arid5b/Dlk1/Itpr1/Meg3/Ndn	5
Medulla	CD_vs_HC	CD up	GO:0048168	regulation of neuronal synaptic plasticity	4/105	73/28891	0.0001478	0.005434	0.003907	Camk2b/S100b/Shank3/Snca	4
Medulla	CD_vs_HC	CD up	GO:0070050	neuron cellular homeostasis	4/105	73/28891	0.0001478	0.005434	0.003907	Atp6v0a1/Npy/Slc17a7/Slc24a2	4
Medulla	CD_vs_HC	CD up	GO:0008277	regulation of G protein-coupled receptor signaling pathway	5/105	138/28891	0.0001522	0.005498	0.003953	Adcyap1/Camk2b/Gprasp1/Klk6/Snca	5
Medulla	CD_vs_HC	CD up	GO:0099175	regulation of postsynapse organization	5/105	139/28891	0.0001574	0.00559	0.00402	Camk2b/Kif1a/Lzts3/Shank2/Shank3	5
Medulla	CD_vs_HC	CD up	GO:0007585	respiratory gaseous exchange by respiratory system	4/105	75/28891	0.0001642	0.005639	0.004054	Gaa/Gls/Hoxa5/Ndn	4
Medulla	CD_vs_HC	CD up	GO:0050805	negative regulation of synaptic transmission	4/105	75/28891	0.0001642	0.005639	0.004054	Bcl2l1/Shank2/Shank3/Slc24a2	4
Medulla	CD_vs_HC	CD up	GO:0060997	dendritic spine morphogenesis	4/105	76/28891	0.0001728	0.00584	0.004199	Camk2b/Kif1a/Lzts3/Shank3	4
Medulla	CD_vs_HC	CD up	GO:0042886	amide transport	8/105	432/28891	0.0001844	0.006078	0.00437	Adcyap1/Baiap3/Itpr1/Ptprn/Slc15a2/Slc17a7/Slc1a3/Snca	8
Medulla	CD_vs_HC	CD up	GO:0046165	alcohol biosynthetic process	5/105	144/28891	0.0001857	0.006078	0.00437	Dhcr24/Fdps/Hmgcs1/Idi1/Snca	5
Medulla	CD_vs_HC	CD up	GO:0050432	catecholamine secretion	4/105	79/28891	0.0002007	0.006469	0.004651	Pcp4/Snca/Sncg/Syt1	4
Medulla	CD_vs_HC	CD up	GO:0048706	embryonic skeletal system development	5/105	148/28891	0.0002109	0.006695	0.004814	Dlk1/Hoxa5/Hoxb4/Hoxb5/Hoxc4	5
Medulla	CD_vs_HC	CD up	GO:0140056	organelle localization by membrane tethering	4/105	81/28891	0.000221	0.006911	0.004969	Rab3c/Syt1/Unc13c/Vamp2	4
Medulla	CD_vs_HC	CD up	GO:0031338	regulation of vesicle fusion	3/105	33/28891	0.0002351	0.007243	0.005207	Cplx2/Snca/Syt1	3
Medulla	CD_vs_HC	CD up	GO:0010976	positive regulation of neuron projection development	6/105	239/28891	0.0002447	0.007325	0.005266	Adcyap1/Ahi1/Camk2b/Hap1/Itpr1/Pcp4	6
Medulla	CD_vs_HC	CD up	GO:0031669	cellular response to nutrient levels	6/105	239/28891	0.0002447	0.007325	0.005266	Cdkn1a/Fam107a/Impact/Pdk4/Plin3/Slc2a1	6
Medulla	CD_vs_HC	CD up	GO:0010959	regulation of metal ion transport	8/105	461/28891	0.0002857	0.007993	0.005747	Adcyap1/Ank2/Cacna1g/Fxyd6/Hap1/Itpr1/Snca/Vamp2	8
Medulla	CD_vs_HC	CD up	GO:0022406	membrane docking	4/105	87/28891	0.0002908	0.007993	0.005747	Rab3c/Syt1/Unc13c/Vamp2	4
Medulla	CD_vs_HC	CD up	GO:0031346	positive regulation of cell projection organization	8/105	463/28891	0.0002941	0.007993	0.005747	Adcyap1/Ahi1/Anln/Camk2b/Chodl/Hap1/Itpr1/Pcp4	8
Medulla	CD_vs_HC	CD up	GO:1901617	organic hydroxy compound biosynthetic process	6/105	248/28891	0.0002983	0.007993	0.005747	Dhcr24/Fdps/Hmgcs1/Idi1/Pdxk/Snca	6
Medulla	CD_vs_HC	CD up	GO:0006637	acyl-CoA metabolic process	4/105	88/28891	0.0003038	0.007993	0.005747	Fasn/Hmgcs1/Pdk4/Snca	4
Medulla	CD_vs_HC	CD up	GO:0015807	L-amino acid transport	4/105	88/28891	0.0003038	0.007993	0.005747	Slc17a7/Slc1a3/Slc6a17/Slc7a5	4
Medulla	CD_vs_HC	CD up	GO:0035383	thioester metabolic process	4/105	88/28891	0.0003038	0.007993	0.005747	Fasn/Hmgcs1/Pdk4/Snca	4
Medulla	CD_vs_HC	CD up	GO:0046323	glucose import	4/105	88/28891	0.0003038	0.007993	0.005747	Adipor2/Ahi1/Pea15a/Slc2a1	4
Medulla	CD_vs_HC	CD up	GO:0006813	potassium ion transport	6/105	249/28891	0.0003048	0.007993	0.005747	Adcyap1/Ank2/Slc17a7/Slc1a3/Slc24a2/Vamp2	6
Medulla	CD_vs_HC	CD up	GO:0006084	acetyl-CoA metabolic process	3/105	36/28891	0.0003052	0.007993	0.005747	Fasn/Hmgcs1/Pdk4	3
Medulla	CD_vs_HC	CD up	GO:0099173	postsynapse organization	6/105	252/28891	0.0003248	0.008262	0.00594	Camk2b/Dgkz/Kif1a/Lzts3/Shank2/Shank3	6
Medulla	CD_vs_HC	CD up	GO:0030808	regulation of nucleotide biosynthetic process	3/105	37/28891	0.0003313	0.008262	0.00594	Bcl2l1/Pdk4/Snca	3
Medulla	CD_vs_HC	CD up	GO:1900371	regulation of purine nucleotide biosynthetic process	3/105	37/28891	0.0003313	0.008262	0.00594	Bcl2l1/Pdk4/Snca	3
Medulla	CD_vs_HC	CD up	GO:1903421	regulation of synaptic vesicle recycling	3/105	37/28891	0.0003313	0.008262	0.00594	Bcl2l1/Slc17a7/Vamp2	3
Medulla	CD_vs_HC	CD up	GO:0031400	negative regulation of protein modification process	8/105	473/28891	0.0003391	0.008358	0.006009	Bex2/Cdk5rap1/Cdkn1a/Dbndd2/Impact/Ivns1abp/Pcp4/Snca	8
Medulla	CD_vs_HC	CD up	GO:0007218	neuropeptide signaling pathway	4/105	92/28891	0.00036	0.00877	0.006306	Adcyap1/Calca/Npy/Tac1	4
Medulla	CD_vs_HC	CD up	GO:0042908	xenobiotic transport	3/105	39/28891	0.0003876	0.009333	0.006711	Slc15a2/Slc2a1/Slc7a5	3
Medulla	CD_vs_HC	CD up	GO:0006865	amino acid transport	5/105	170/28891	0.0003995	0.009511	0.006839	Slc17a7/Slc1a3/Slc6a17/Slc7a5/Snca	5
Medulla	CD_vs_HC	CD up	GO:0050890	cognition	7/105	371/28891	0.0004215	0.009921	0.007134	Fam107a/S100b/Shank2/Shank3/Slc17a7/Slc24a2/Tac1	7
Medulla	CD_vs_HC	CD up	GO:0042391	regulation of membrane potential	8/105	491/28891	0.0004343	0.01011	0.007269	Adcyap1/Ank2/Bcl2l1/Cacna1g/Shank3/Slc17a7/Snca/Tac1	8
Medulla	CD_vs_HC	CD up	GO:0051937	catecholamine transport	4/105	97/28891	0.0004403	0.01014	0.007288	Pcp4/Snca/Sncg/Syt1	4
Medulla	CD_vs_HC	CD up	GO:0008299	isoprenoid biosynthetic process	3/105	41/28891	0.0004497	0.01024	0.007363	Fdps/Hmgcs1/Idi1	3
Medulla	CD_vs_HC	CD up	GO:0031668	cellular response to extracellular stimulus	6/105	271/28891	0.0004774	0.01075	0.007732	Cdkn1a/Fam107a/Impact/Pdk4/Plin3/Slc2a1	6
Medulla	CD_vs_HC	CD up	GO:0051968	positive regulation of synaptic transmission, glutamatergic	3/105	42/28891	0.000483	0.01077	0.00774	Adcyap1/Shank2/Shank3	3
Medulla	CD_vs_HC	CD up	GO:0095500	acetylcholine receptor signaling pathway	3/105	43/28891	0.0005179	0.01142	0.008212	Itpr1/Ly6h/Rgs8	3
Medulla	CD_vs_HC	CD up	GO:2001237	negative regulation of extrinsic apoptotic signaling pathway	4/105	102/28891	0.0005325	0.0116	0.008339	Bcl2l1/Pea15a/Scg2/Sgk3	4
Medulla	CD_vs_HC	CD up	GO:0045921	positive regulation of exocytosis	4/105	103/28891	0.0005525	0.0116	0.008339	Bcl2l1/Cacna1g/Snca/Syt1	4
Medulla	CD_vs_HC	CD up	GO:0032228	regulation of synaptic transmission, GABAergic	3/105	44/28891	0.0005543	0.0116	0.008339	Baiap3/Hap1/Tac1	3
Medulla	CD_vs_HC	CD up	GO:0009267	cellular response to starvation	5/105	184/28891	0.0005728	0.0116	0.008339	Cdkn1a/Impact/Pdk4/Plin3/Slc2a1	5
Medulla	CD_vs_HC	CD up	GO:0015820	leucine transport	2/105	10/28891	0.0005777	0.0116	0.008339	Slc6a17/Slc7a5	2
Medulla	CD_vs_HC	CD up	GO:0033603	positive regulation of dopamine secretion	2/105	10/28891	0.0005777	0.0116	0.008339	Pcp4/Syt1	2
Medulla	CD_vs_HC	CD up	GO:0086015	SA node cell action potential	2/105	10/28891	0.0005777	0.0116	0.008339	Ank2/Cacna1g	2
Medulla	CD_vs_HC	CD up	GO:0086018	SA node cell to atrial cardiac muscle cell signaling	2/105	10/28891	0.0005777	0.0116	0.008339	Ank2/Cacna1g	2
Medulla	CD_vs_HC	CD up	GO:0086070	SA node cell to atrial cardiac muscle cell communication	2/105	10/28891	0.0005777	0.0116	0.008339	Ank2/Cacna1g	2
Medulla	CD_vs_HC	CD up	GO:0034764	positive regulation of transmembrane transport	6/105	282/28891	0.0005883	0.0116	0.008339	Adipor2/Ank2/Hap1/Shank3/Slc7a5/Snca	6
Medulla	CD_vs_HC	CD up	GO:0006904	vesicle docking involved in exocytosis	3/105	45/28891	0.0005924	0.0116	0.008339	Rab3c/Unc13c/Vamp2	3
Medulla	CD_vs_HC	CD up	GO:1905145	cellular response to acetylcholine	3/105	45/28891	0.0005924	0.0116	0.008339	Itpr1/Ly6h/Rgs8	3
Medulla	CD_vs_HC	CD up	GO:0050795	regulation of behavior	4/105	108/28891	0.0006605	0.01269	0.009128	Ahi1/Baiap3/Npy/Shank3	4
Medulla	CD_vs_HC	CD up	GO:0097061	dendritic spine organization	4/105	108/28891	0.0006605	0.01269	0.009128	Camk2b/Kif1a/Lzts3/Shank3	4
Medulla	CD_vs_HC	CD up	GO:0030534	adult behavior	5/105	191/28891	0.000678	0.01289	0.009268	Npy/Shank2/Shank3/Snca/Sncg	5
Medulla	CD_vs_HC	CD up	GO:0048813	dendrite morphogenesis	5/105	192/28891	0.0006942	0.01289	0.009268	Camk2b/Dpysl5/Kif1a/Lzts3/Shank3	5
Medulla	CD_vs_HC	CD up	GO:0015803	branched-chain amino acid transport	2/105	11/28891	0.0007043	0.01289	0.009268	Slc6a17/Slc7a5	2
Medulla	CD_vs_HC	CD up	GO:0086016	AV node cell action potential	2/105	11/28891	0.0007043	0.01289	0.009268	Ank2/Cacna1g	2
Medulla	CD_vs_HC	CD up	GO:0086027	AV node cell to bundle of His cell signaling	2/105	11/28891	0.0007043	0.01289	0.009268	Ank2/Cacna1g	2
Medulla	CD_vs_HC	CD up	GO:0048704	embryonic skeletal system morphogenesis	4/105	110/28891	0.0007076	0.01289	0.009268	Hoxa5/Hoxb4/Hoxb5/Hoxc4	4
Medulla	CD_vs_HC	CD up	GO:1905144	response to acetylcholine	3/105	48/28891	0.0007163	0.01294	0.009302	Itpr1/Ly6h/Rgs8	3
Medulla	CD_vs_HC	CD up	GO:0022898	regulation of transmembrane transporter activity	6/105	294/28891	0.0007311	0.01309	0.009412	Ank2/Fxyd6/Hap1/Shank3/Snca/Vamp2	6
Medulla	CD_vs_HC	CD up	GO:0009914	hormone transport	7/105	411/28891	0.0007714	0.0137	0.009847	Adcyap1/Baiap3/Itpr1/Ptprn/Slc7a5/Tac1/Vamp2	7
Medulla	CD_vs_HC	CD up	GO:0033865	nucleoside bisphosphate metabolic process	4/105	116/28891	0.0008631	0.01494	0.01074	Fasn/Hmgcs1/Pdk4/Snca	4
Medulla	CD_vs_HC	CD up	GO:0033875	ribonucleoside bisphosphate metabolic process	4/105	116/28891	0.0008631	0.01494	0.01074	Fasn/Hmgcs1/Pdk4/Snca	4
Medulla	CD_vs_HC	CD up	GO:0034032	purine nucleoside bisphosphate metabolic process	4/105	116/28891	0.0008631	0.01494	0.01074	Fasn/Hmgcs1/Pdk4/Snca	4
Medulla	CD_vs_HC	CD up	GO:1902075	cellular response to salt	5/105	202/28891	0.0008718	0.01497	0.01076	Itpr1/Ly6h/Rgs8/Slc1a3/Syt1	5
Medulla	CD_vs_HC	CD up	GO:0015844	monoamine transport	4/105	117/28891	0.0008912	0.01518	0.01091	Pcp4/Snca/Sncg/Syt1	4
Medulla	CD_vs_HC	CD up	GO:0050905	neuromuscular process	5/105	204/28891	0.0009111	0.0153	0.011	Camk2b/Gaa/Itpr1/Shank3/Slc1a3	5
Medulla	CD_vs_HC	CD up	GO:0032409	regulation of transporter activity	6/105	307/28891	0.0009146	0.0153	0.011	Ank2/Fxyd6/Hap1/Shank3/Snca/Vamp2	6
Medulla	CD_vs_HC	CD up	GO:0106027	neuron projection organization	4/105	118/28891	0.0009199	0.0153	0.011	Camk2b/Kif1a/Lzts3/Shank3	4
Medulla	CD_vs_HC	CD up	GO:1904659	glucose transmembrane transport	4/105	119/28891	0.0009493	0.01543	0.01109	Adipor2/Ahi1/Pea15a/Slc2a1	4
Medulla	CD_vs_HC	CD up	GO:1900542	regulation of purine nucleotide metabolic process	3/105	53/28891	0.0009575	0.01543	0.01109	Bcl2l1/Pdk4/Snca	3
Medulla	CD_vs_HC	CD up	GO:0031667	response to nutrient levels	7/105	427/28891	0.0009633	0.01543	0.01109	Cdkn1a/Fam107a/Impact/Npy/Pdk4/Plin3/Slc2a1	7
Medulla	CD_vs_HC	CD up	GO:0098739	import across plasma membrane	5/105	207/28891	0.0009724	0.01543	0.01109	Slc15a2/Slc1a3/Slc24a2/Slc2a1/Slc7a5	5
Medulla	CD_vs_HC	CD up	GO:0008645	hexose transmembrane transport	4/105	120/28891	0.0009793	0.01543	0.01109	Adipor2/Ahi1/Pea15a/Slc2a1	4
Medulla	CD_vs_HC	CD up	GO:0033555	multicellular organismal response to stress	4/105	120/28891	0.0009793	0.01543	0.01109	Adcyap1/Calca/Shank3/Tac1	4
Medulla	CD_vs_HC	CD up	GO:0010642	negative regulation of platelet-derived growth factor receptor signaling pathway	2/105	13/28891	0.0009942	0.01543	0.01109	Apod/Snca	2
Medulla	CD_vs_HC	CD up	GO:0031223	auditory behavior	2/105	13/28891	0.0009942	0.01543	0.01109	Shank3/Slc1a3	2
Medulla	CD_vs_HC	CD up	GO:0086067	AV node cell to bundle of His cell communication	2/105	13/28891	0.0009942	0.01543	0.01109	Ank2/Cacna1g	2
Medulla	CD_vs_HC	CD up	GO:0006140	regulation of nucleotide metabolic process	3/105	54/28891	0.001011	0.01552	0.01116	Bcl2l1/Pdk4/Snca	3
Medulla	CD_vs_HC	CD up	GO:0042594	response to starvation	5/105	209/28891	0.001015	0.01552	0.01116	Cdkn1a/Impact/Pdk4/Plin3/Slc2a1	5
Medulla	CD_vs_HC	CD up	GO:0008585	female gonad development	4/105	122/28891	0.001041	0.01581	0.01137	Adcyap1/Arid5b/Bcl2l1/Ptprn	4
Medulla	CD_vs_HC	CD up	GO:0009306	protein secretion	7/105	434/28891	0.001058	0.01595	0.01147	Adcyap1/Ahi1/Baiap3/Itpr1/Ptprn/Rab3c/Sncg	7
Medulla	CD_vs_HC	CD up	GO:0035592	establishment of protein localization to extracellular region	7/105	435/28891	0.001072	0.01595	0.01147	Adcyap1/Ahi1/Baiap3/Itpr1/Ptprn/Rab3c/Sncg	7
Medulla	CD_vs_HC	CD up	GO:0015749	monosaccharide transmembrane transport	4/105	123/28891	0.001073	0.01595	0.01147	Adipor2/Ahi1/Pea15a/Slc2a1	4
Medulla	CD_vs_HC	CD up	GO:0051954	positive regulation of amine transport	3/105	56/28891	0.001124	0.01643	0.01181	Pcp4/Slc7a5/Syt1	3
Medulla	CD_vs_HC	CD up	GO:0051648	vesicle localization	5/105	214/28891	0.001127	0.01643	0.01181	Ahi1/Bcl2l1/Hap1/Kif1a/Snca	5
Medulla	CD_vs_HC	CD up	GO:0046545	development of primary female sexual characteristics	4/105	125/28891	0.001139	0.01643	0.01181	Adcyap1/Arid5b/Bcl2l1/Ptprn	4
Medulla	CD_vs_HC	CD up	GO:0015824	proline transport	2/105	14/28891	0.001157	0.01643	0.01181	Slc6a17/Slc7a5	2
Medulla	CD_vs_HC	CD up	GO:0016081	synaptic vesicle docking	2/105	14/28891	0.001157	0.01643	0.01181	Unc13c/Vamp2	2
Medulla	CD_vs_HC	CD up	GO:0042762	regulation of sulfur metabolic process	2/105	14/28891	0.001157	0.01643	0.01181	Pdk4/Snca	2
Medulla	CD_vs_HC	CD up	GO:0071692	protein localization to extracellular region	7/105	441/28891	0.00116	0.01643	0.01181	Adcyap1/Ahi1/Baiap3/Itpr1/Ptprn/Rab3c/Sncg	7
Medulla	CD_vs_HC	CD up	GO:0006906	vesicle fusion	4/105	126/28891	0.001174	0.0165	0.01186	Cplx2/Snca/Syt1/Vamp2	4
Medulla	CD_vs_HC	CD up	GO:0090174	organelle membrane fusion	4/105	128/28891	0.001244	0.01737	0.01249	Cplx2/Snca/Syt1/Vamp2	4
Medulla	CD_vs_HC	CD up	GO:2000300	regulation of synaptic vesicle exocytosis	3/105	59/28891	0.001308	0.018	0.01294	Bcl2l1/Npy/Syt1	3
Medulla	CD_vs_HC	CD up	GO:0060078	regulation of postsynaptic membrane potential	4/105	130/28891	0.001317	0.018	0.01294	Adcyap1/Shank3/Slc17a7/Snca	4
Medulla	CD_vs_HC	CD up	GO:0002674	negative regulation of acute inflammatory response	2/105	15/28891	0.001332	0.018	0.01294	Adcyap1/Npy	2
Medulla	CD_vs_HC	CD up	GO:1990504	dense core granule exocytosis	2/105	15/28891	0.001332	0.018	0.01294	Baiap3/Unc13c	2
Medulla	CD_vs_HC	CD up	GO:2000811	negative regulation of anoikis	2/105	15/28891	0.001332	0.018	0.01294	Bcl2l1/Pdk4	2
Medulla	CD_vs_HC	CD up	GO:0007611	learning or memory	6/105	331/28891	0.001345	0.01806	0.01298	S100b/Shank2/Shank3/Slc17a7/Slc24a2/Tac1	6
Medulla	CD_vs_HC	CD up	GO:0034219	carbohydrate transmembrane transport	4/105	132/28891	0.001393	0.01859	0.01337	Adipor2/Ahi1/Pea15a/Slc2a1	4
Medulla	CD_vs_HC	CD up	GO:0071496	cellular response to external stimulus	6/105	335/28891	0.001429	0.01895	0.01363	Cdkn1a/Fam107a/Impact/Pdk4/Plin3/Slc2a1	6
Medulla	CD_vs_HC	CD up	GO:0098926	postsynaptic signal transduction	3/105	61/28891	0.00144	0.01898	0.01365	Itpr1/Ly6h/Rgs8	3
Medulla	CD_vs_HC	CD up	GO:0060996	dendritic spine development	4/105	134/28891	0.001473	0.01917	0.01378	Camk2b/Kif1a/Lzts3/Shank3	4
Medulla	CD_vs_HC	CD up	GO:0009991	response to extracellular stimulus	7/105	460/28891	0.001477	0.01917	0.01378	Cdkn1a/Fam107a/Impact/Npy/Pdk4/Plin3/Slc2a1	7
Medulla	CD_vs_HC	CD up	GO:0007638	mechanosensory behavior	2/105	16/28891	0.001519	0.01917	0.01378	Shank3/Slc1a3	2
Medulla	CD_vs_HC	CD up	GO:0019732	antifungal humoral response	2/105	16/28891	0.001519	0.01917	0.01378	Npy/Tac1	2
Medulla	CD_vs_HC	CD up	GO:0032222	regulation of synaptic transmission, cholinergic	2/105	16/28891	0.001519	0.01917	0.01378	Camk2b/Tac1	2
Medulla	CD_vs_HC	CD up	GO:0051895	negative regulation of focal adhesion assembly	2/105	16/28891	0.001519	0.01917	0.01378	Apod/Fam107a	2
Medulla	CD_vs_HC	CD up	GO:0150118	negative regulation of cell-substrate junction organization	2/105	16/28891	0.001519	0.01917	0.01378	Apod/Fam107a	2
Medulla	CD_vs_HC	CD up	GO:0051209	release of sequestered calcium ion into cytosol	4/105	136/28891	0.001555	0.01951	0.01403	Ank2/Hap1/Itpr1/Snca	4
Medulla	CD_vs_HC	CD up	GO:0045744	negative regulation of G protein-coupled receptor signaling pathway	3/105	63/28891	0.001581	0.01967	0.01415	Camk2b/Gprasp1/Snca	3
Medulla	CD_vs_HC	CD up	GO:0001933	negative regulation of protein phosphorylation	6/105	342/28891	0.001587	0.01967	0.01415	Cdk5rap1/Cdkn1a/Dbndd2/Impact/Pcp4/Snca	6
Medulla	CD_vs_HC	CD up	GO:0051283	negative regulation of sequestering of calcium ion	4/105	137/28891	0.001597	0.01968	0.01415	Ank2/Hap1/Itpr1/Snca	4
Medulla	CD_vs_HC	CD up	GO:1902074	response to salt	6/105	343/28891	0.001611	0.01973	0.01419	Itpr1/Ly6h/Rgs8/Slc1a3/Snca/Syt1	6
Medulla	CD_vs_HC	CD up	GO:0006816	calcium ion transport	7/105	469/28891	0.001649	0.02003	0.01441	Ank2/Cacna1g/Camk2b/Hap1/Itpr1/Slc24a2/Snca	7
Medulla	CD_vs_HC	CD up	GO:1903307	positive regulation of regulated secretory pathway	3/105	64/28891	0.001654	0.02003	0.01441	Bcl2l1/Cacna1g/Syt1	3
Medulla	CD_vs_HC	CD up	GO:0051282	regulation of sequestering of calcium ion	4/105	139/28891	0.001684	0.02028	0.01458	Ank2/Hap1/Itpr1/Snca	4
Medulla	CD_vs_HC	CD up	GO:0032328	alanine transport	2/105	17/28891	0.001717	0.02056	0.01478	Slc6a17/Slc7a5	2
Medulla	CD_vs_HC	CD up	GO:0051208	sequestering of calcium ion	4/105	141/28891	0.001775	0.02112	0.01519	Ank2/Hap1/Itpr1/Snca	4
Medulla	CD_vs_HC	CD up	GO:0048008	platelet-derived growth factor receptor signaling pathway	3/105	66/28891	0.001808	0.02139	0.01538	Apod/Arid5b/Snca	3
Medulla	CD_vs_HC	CD up	GO:0045776	negative regulation of blood pressure	3/105	67/28891	0.001887	0.02206	0.01586	Calca/Npy/Tac1	3
Medulla	CD_vs_HC	CD up	GO:0070588	calcium ion transmembrane transport	6/105	354/28891	0.001888	0.02206	0.01586	Ank2/Cacna1g/Hap1/Itpr1/Slc24a2/Snca	6
Medulla	CD_vs_HC	CD up	GO:1905039	carboxylic acid transmembrane transport	4/105	144/28891	0.001916	0.02206	0.01586	Slc17a7/Slc1a3/Slc2a1/Slc7a5	4
Medulla	CD_vs_HC	CD up	GO:0002862	negative regulation of inflammatory response to antigenic stimulus	2/105	18/28891	0.001927	0.02206	0.01586	Adcyap1/Npy	2
Medulla	CD_vs_HC	CD up	GO:0035493	SNARE complex assembly	2/105	18/28891	0.001927	0.02206	0.01586	Snca/Vamp2	2
Medulla	CD_vs_HC	CD up	GO:0097401	synaptic vesicle lumen acidification	2/105	18/28891	0.001927	0.02206	0.01586	Atp6v0a1/Slc17a7	2
Medulla	CD_vs_HC	CD up	GO:1903825	organic acid transmembrane transport	4/105	145/28891	0.001965	0.02218	0.01595	Slc17a7/Slc1a3/Slc2a1/Slc7a5	4
Medulla	CD_vs_HC	CD up	GO:0033363	secretory granule organization	3/105	68/28891	0.001969	0.02218	0.01595	Acrbp/Baiap3/Ptprn	3
Medulla	CD_vs_HC	CD up	GO:2000134	negative regulation of G1/S transition of mitotic cell cycle	3/105	68/28891	0.001969	0.02218	0.01595	Cdkn1a/Dgkz/Fam107a	3
Medulla	CD_vs_HC	CD up	GO:0051932	synaptic transmission, GABAergic	3/105	69/28891	0.002053	0.02285	0.01643	Baiap3/Hap1/Tac1	3
Medulla	CD_vs_HC	CD up	GO:0046942	carboxylic acid transport	6/105	362/28891	0.002111	0.02285	0.01643	Slc17a7/Slc1a3/Slc2a1/Slc6a17/Slc7a5/Snca	6
Medulla	CD_vs_HC	CD up	GO:0003018	vascular process in circulatory system	5/105	247/28891	0.002116	0.02285	0.01643	Adcyap1/Cacna1g/Calca/Slc2a1/Uts2b	5
Medulla	CD_vs_HC	CD up	GO:1902475	L-alpha-amino acid transmembrane transport	3/105	70/28891	0.00214	0.02285	0.01643	Slc17a7/Slc1a3/Slc7a5	3
Medulla	CD_vs_HC	CD up	GO:0001878	response to yeast	2/105	19/28891	0.002149	0.02285	0.01643	Npy/Tac1	2
Medulla	CD_vs_HC	CD up	GO:0031340	positive regulation of vesicle fusion	2/105	19/28891	0.002149	0.02285	0.01643	Snca/Syt1	2
Medulla	CD_vs_HC	CD up	GO:0031630	regulation of synaptic vesicle fusion to presynaptic active zone membrane	2/105	19/28891	0.002149	0.02285	0.01643	Cplx2/Syt1	2
Medulla	CD_vs_HC	CD up	GO:0033605	positive regulation of catecholamine secretion	2/105	19/28891	0.002149	0.02285	0.01643	Pcp4/Syt1	2
Medulla	CD_vs_HC	CD up	GO:0045956	positive regulation of calcium ion-dependent exocytosis	2/105	19/28891	0.002149	0.02285	0.01643	Cacna1g/Syt1	2
Medulla	CD_vs_HC	CD up	GO:1900452	regulation of long-term synaptic depression	2/105	19/28891	0.002149	0.02285	0.01643	Bcl2l1/Shank3	2
Medulla	CD_vs_HC	CD up	GO:1901632	regulation of synaptic vesicle membrane organization	2/105	19/28891	0.002149	0.02285	0.01643	Cplx2/Syt1	2
Medulla	CD_vs_HC	CD up	GO:0015849	organic acid transport	6/105	364/28891	0.00217	0.02296	0.01651	Slc17a7/Slc1a3/Slc2a1/Slc6a17/Slc7a5/Snca	6
Medulla	CD_vs_HC	CD up	GO:0050767	regulation of neurogenesis	7/105	494/28891	0.002209	0.02322	0.0167	Adcyap1/Camk2b/Chodl/Dpysl5/Hap1/Shank3/Slc7a5	7
Medulla	CD_vs_HC	CD up	GO:0008203	cholesterol metabolic process	4/105	150/28891	0.002223	0.02322	0.0167	Dhcr24/Fdps/Hmgcs1/Idi1	4
Medulla	CD_vs_HC	CD up	GO:0046324	regulation of glucose import	3/105	71/28891	0.002228	0.02322	0.0167	Adipor2/Ahi1/Pea15a	3
Medulla	CD_vs_HC	CD up	GO:0051928	positive regulation of calcium ion transport	4/105	151/28891	0.002277	0.02362	0.01698	Ank2/Hap1/Itpr1/Snca	4
Medulla	CD_vs_HC	CD up	GO:2001234	negative regulation of apoptotic signaling pathway	5/105	253/28891	0.002347	0.02422	0.01742	Bcl2l1/Ivns1abp/Pea15a/Scg2/Sgk3	5
Medulla	CD_vs_HC	CD up	GO:0032230	positive regulation of synaptic transmission, GABAergic	2/105	20/28891	0.002382	0.02434	0.0175	Hap1/Tac1	2
Medulla	CD_vs_HC	CD up	GO:0071514	genomic imprinting	2/105	20/28891	0.002382	0.02434	0.0175	Meg3/Ndn	2
Medulla	CD_vs_HC	CD up	GO:0042326	negative regulation of phosphorylation	6/105	372/28891	0.002418	0.02459	0.01768	Cdk5rap1/Cdkn1a/Dbndd2/Impact/Pcp4/Snca	6
Medulla	CD_vs_HC	CD up	GO:0046660	female sex differentiation	4/105	155/28891	0.002503	0.02525	0.01816	Adcyap1/Arid5b/Bcl2l1/Ptprn	4
Medulla	CD_vs_HC	CD up	GO:0015800	acidic amino acid transport	3/105	74/28891	0.002507	0.02525	0.01816	Slc17a7/Slc1a3/Snca	3
Medulla	CD_vs_HC	CD up	GO:0007190	activation of adenylate cyclase activity	2/105	21/28891	0.002626	0.02608	0.01875	Adcyap1/Calca	2
Medulla	CD_vs_HC	CD up	GO:0007213	G protein-coupled acetylcholine receptor signaling pathway	2/105	21/28891	0.002626	0.02608	0.01875	Itpr1/Rgs8	2
Medulla	CD_vs_HC	CD up	GO:0046325	negative regulation of glucose import	2/105	21/28891	0.002626	0.02608	0.01875	Ahi1/Pea15a	2
Medulla	CD_vs_HC	CD up	GO:1902807	negative regulation of cell cycle G1/S phase transition	3/105	76/28891	0.002705	0.02673	0.01922	Cdkn1a/Dgkz/Fam107a	3
Medulla	CD_vs_HC	CD up	GO:0006814	sodium ion transport	5/105	262/28891	0.002728	0.02684	0.0193	Cacna1g/Fxyd6/Slc17a7/Slc24a2/Slc6a17	5
Medulla	CD_vs_HC	CD up	GO:0008643	carbohydrate transport	4/105	160/28891	0.002806	0.02747	0.01975	Adipor2/Ahi1/Pea15a/Slc2a1	4
Medulla	CD_vs_HC	CD up	GO:0051259	protein complex oligomerization	5/105	264/28891	0.002819	0.02747	0.01975	Gls/Lzts3/Peg10/Snca/Syt1	5
Medulla	CD_vs_HC	CD up	GO:0071625	vocalization behavior	2/105	22/28891	0.002882	0.02782	0.02001	Shank2/Shank3	2
Medulla	CD_vs_HC	CD up	GO:2000209	regulation of anoikis	2/105	22/28891	0.002882	0.02782	0.02001	Bcl2l1/Pdk4	2
Medulla	CD_vs_HC	CD up	GO:0048705	skeletal system morphogenesis	5/105	266/28891	0.002912	0.02786	0.02003	Arid5b/Hoxa5/Hoxb4/Hoxb5/Hoxc4	5
Medulla	CD_vs_HC	CD up	GO:0043279	response to alkaloid	3/105	78/28891	0.002912	0.02786	0.02003	Bcl2l1/Slc1a3/Snca	3
Medulla	CD_vs_HC	CD up	GO:1902652	secondary alcohol metabolic process	4/105	162/28891	0.002935	0.02795	0.02009	Dhcr24/Fdps/Hmgcs1/Idi1	4
Medulla	CD_vs_HC	CD up	GO:0016125	sterol metabolic process	4/105	163/28891	0.003	0.02844	0.02045	Dhcr24/Fdps/Hmgcs1/Idi1	4
Medulla	CD_vs_HC	CD up	GO:0014009	glial cell proliferation	3/105	79/28891	0.003019	0.02849	0.02048	Adcyap1/Shank3/Slc7a5	3
Medulla	CD_vs_HC	CD up	GO:0042053	regulation of dopamine metabolic process	2/105	23/28891	0.003149	0.02945	0.02118	Npy/Snca	2
Medulla	CD_vs_HC	CD up	GO:0050965	detection of temperature stimulus involved in sensory perception of pain	2/105	23/28891	0.003149	0.02945	0.02118	Calca/Tac1	2
Medulla	CD_vs_HC	CD up	GO:0007626	locomotory behavior	5/105	273/28891	0.003253	0.03029	0.02178	Gaa/Shank2/Shank3/Snca/Sncg	5
Medulla	CD_vs_HC	CD up	GO:0002673	regulation of acute inflammatory response	3/105	82/28891	0.003354	0.03095	0.02225	Adcyap1/Npy/Tac1	3
Medulla	CD_vs_HC	CD up	GO:0051279	regulation of release of sequestered calcium ion into cytosol	3/105	82/28891	0.003354	0.03095	0.02225	Ank2/Hap1/Snca	3
Medulla	CD_vs_HC	CD up	GO:0035725	sodium ion transmembrane transport	4/105	169/28891	0.003414	0.03095	0.02225	Cacna1g/Fxyd6/Slc24a2/Slc6a17	4
Medulla	CD_vs_HC	CD up	GO:0008090	retrograde axonal transport	2/105	24/28891	0.003427	0.03095	0.02225	Hap1/Kif1a	2
Medulla	CD_vs_HC	CD up	GO:0010640	regulation of platelet-derived growth factor receptor signaling pathway	2/105	24/28891	0.003427	0.03095	0.02225	Apod/Snca	2
Medulla	CD_vs_HC	CD up	GO:0016114	terpenoid biosynthetic process	2/105	24/28891	0.003427	0.03095	0.02225	Fdps/Hmgcs1	2
Medulla	CD_vs_HC	CD up	GO:0031571	mitotic G1 DNA damage checkpoint signaling	2/105	24/28891	0.003427	0.03095	0.02225	Cdkn1a/Dgkz	2
Medulla	CD_vs_HC	CD up	GO:1990778	protein localization to cell periphery	6/105	400/28891	0.003456	0.03099	0.02228	Ank2/Bcl2l1/Camk2b/Rab3c/Snca/Vamp2	6
Medulla	CD_vs_HC	CD up	GO:0043270	positive regulation of monoatomic ion transport	5/105	277/28891	0.003461	0.03099	0.02228	Ank2/Hap1/Itpr1/Shank3/Snca	5
Medulla	CD_vs_HC	CD up	GO:0048284	organelle fusion	4/105	171/28891	0.003561	0.03148	0.02263	Cplx2/Snca/Syt1/Vamp2	4
Medulla	CD_vs_HC	CD up	GO:0061025	membrane fusion	4/105	171/28891	0.003561	0.03148	0.02263	Cplx2/Snca/Syt1/Vamp2	4
Medulla	CD_vs_HC	CD up	GO:2001236	regulation of extrinsic apoptotic signaling pathway	4/105	171/28891	0.003561	0.03148	0.02263	Bcl2l1/Pea15a/Scg2/Sgk3	4
Medulla	CD_vs_HC	CD up	GO:0046879	hormone secretion	6/105	403/28891	0.003584	0.03155	0.02268	Adcyap1/Baiap3/Itpr1/Ptprn/Tac1/Vamp2	6
Medulla	CD_vs_HC	CD up	GO:0042069	regulation of catecholamine metabolic process	2/105	25/28891	0.003717	0.03231	0.02323	Npy/Snca	2
Medulla	CD_vs_HC	CD up	GO:0044819	mitotic G1/S transition checkpoint signaling	2/105	25/28891	0.003717	0.03231	0.02323	Cdkn1a/Dgkz	2
Medulla	CD_vs_HC	CD up	GO:0048791	calcium ion-regulated exocytosis of neurotransmitter	2/105	25/28891	0.003717	0.03231	0.02323	Syt1/Unc13c	2
Medulla	CD_vs_HC	CD up	GO:0032412	regulation of monoatomic ion transmembrane transporter activity	5/105	283/28891	0.00379	0.03281	0.02359	Ank2/Fxyd6/Hap1/Shank3/Vamp2	5
Medulla	CD_vs_HC	CD up	GO:0060998	regulation of dendritic spine development	3/105	86/28891	0.003836	0.03307	0.02378	Camk2b/Kif1a/Shank3	3
Medulla	CD_vs_HC	CD up	GO:0010829	negative regulation of glucose transmembrane transport	2/105	26/28891	0.004017	0.03435	0.0247	Ahi1/Pea15a	2
Medulla	CD_vs_HC	CD up	GO:0045736	negative regulation of cyclin-dependent protein serine/threonine kinase activity	2/105	26/28891	0.004017	0.03435	0.0247	Cdk5rap1/Cdkn1a	2
Medulla	CD_vs_HC	CD up	GO:0072384	organelle transport along microtubule	3/105	88/28891	0.004092	0.03485	0.02505	Hap1/Kif1a/Sun1	3
Medulla	CD_vs_HC	CD up	GO:0006694	steroid biosynthetic process	4/105	179/28891	0.004189	0.03553	0.02555	Dhcr24/Fdps/Hmgcs1/Idi1	4
Medulla	CD_vs_HC	CD up	GO:0048588	developmental cell growth	5/105	291/28891	0.004264	0.03598	0.02587	Fdps/Impact/Ndn/S100b/Syt1	5
Medulla	CD_vs_HC	CD up	GO:0016082	synaptic vesicle priming	2/105	27/28891	0.004328	0.03598	0.02587	Snca/Unc13c	2
Medulla	CD_vs_HC	CD up	GO:0050961	detection of temperature stimulus involved in sensory perception	2/105	27/28891	0.004328	0.03598	0.02587	Calca/Tac1	2
Medulla	CD_vs_HC	CD up	GO:0086019	cell-cell signaling involved in cardiac conduction	2/105	27/28891	0.004328	0.03598	0.02587	Ank2/Cacna1g	2
Medulla	CD_vs_HC	CD up	GO:1904030	negative regulation of cyclin-dependent protein kinase activity	2/105	27/28891	0.004328	0.03598	0.02587	Cdk5rap1/Cdkn1a	2
Medulla	CD_vs_HC	CD up	GO:0051924	regulation of calcium ion transport	5/105	296/28891	0.00458	0.03761	0.02704	Ank2/Cacna1g/Hap1/Itpr1/Snca	5
Medulla	CD_vs_HC	CD up	GO:0010827	regulation of glucose transmembrane transport	3/105	92/28891	0.004634	0.03761	0.02704	Adipor2/Ahi1/Pea15a	3
Medulla	CD_vs_HC	CD up	GO:0015813	L-glutamate transmembrane transport	2/105	28/28891	0.00465	0.03761	0.02704	Slc17a7/Slc1a3	2
Medulla	CD_vs_HC	CD up	GO:0035384	thioester biosynthetic process	2/105	28/28891	0.00465	0.03761	0.02704	Pdk4/Snca	2
Medulla	CD_vs_HC	CD up	GO:0071480	cellular response to gamma radiation	2/105	28/28891	0.00465	0.03761	0.02704	Bcl2l1/Cdkn1a	2
Medulla	CD_vs_HC	CD up	GO:0071616	acyl-CoA biosynthetic process	2/105	28/28891	0.00465	0.03761	0.02704	Pdk4/Snca	2
Medulla	CD_vs_HC	CD up	GO:1900242	regulation of synaptic vesicle endocytosis	2/105	28/28891	0.00465	0.03761	0.02704	Bcl2l1/Slc17a7	2
Medulla	CD_vs_HC	CD up	GO:0050678	regulation of epithelial cell proliferation	6/105	426/28891	0.004688	0.03777	0.02716	Dlk1/Hoxa5/Itpr1/Ptprn/Scg2/Sparc	6
Medulla	CD_vs_HC	CD up	GO:0035296	regulation of tube diameter	4/105	186/28891	0.004796	0.03835	0.02758	Adcyap1/Cacna1g/Calca/Uts2b	4
Medulla	CD_vs_HC	CD up	GO:0097746	blood vessel diameter maintenance	4/105	186/28891	0.004796	0.03835	0.02758	Adcyap1/Cacna1g/Calca/Uts2b	4
Medulla	CD_vs_HC	CD up	GO:0035150	regulation of tube size	4/105	187/28891	0.004888	0.03876	0.02787	Adcyap1/Cacna1g/Calca/Uts2b	4
Medulla	CD_vs_HC	CD up	GO:0010563	negative regulation of phosphorus metabolic process	6/105	430/28891	0.004903	0.03876	0.02787	Cdk5rap1/Cdkn1a/Dbndd2/Impact/Pcp4/Snca	6
Medulla	CD_vs_HC	CD up	GO:0045936	negative regulation of phosphate metabolic process	6/105	430/28891	0.004903	0.03876	0.02787	Cdk5rap1/Cdkn1a/Dbndd2/Impact/Pcp4/Snca	6
Medulla	CD_vs_HC	CD up	GO:0010996	response to auditory stimulus	2/105	29/28891	0.004982	0.03924	0.02821	Shank3/Slc1a3	2
Medulla	CD_vs_HC	CD up	GO:0019233	sensory perception of pain	3/105	95/28891	0.005067	0.03961	0.02848	Calca/Ndn/Tac1	3
Medulla	CD_vs_HC	CD up	GO:0060079	excitatory postsynaptic potential	3/105	95/28891	0.005067	0.03961	0.02848	Shank3/Slc17a7/Snca	3
Medulla	CD_vs_HC	CD up	GO:0015711	organic anion transport	6/105	436/28891	0.005239	0.04072	0.02928	Slc17a7/Slc1a3/Slc2a1/Slc6a17/Slc7a5/Snca	6
Medulla	CD_vs_HC	CD up	GO:2001233	regulation of apoptotic signaling pathway	6/105	437/28891	0.005296	0.04072	0.02928	Bcl2l1/Camk2b/Ivns1abp/Pea15a/Scg2/Sgk3	6
Medulla	CD_vs_HC	CD up	GO:0016048	detection of temperature stimulus	2/105	30/28891	0.005326	0.04072	0.02928	Calca/Tac1	2
Medulla	CD_vs_HC	CD up	GO:0071312	cellular response to alkaloid	2/105	30/28891	0.005326	0.04072	0.02928	Bcl2l1/Slc1a3	2
Medulla	CD_vs_HC	CD up	GO:1902042	negative regulation of extrinsic apoptotic signaling pathway via death domain receptors	2/105	30/28891	0.005326	0.04072	0.02928	Bcl2l1/Pea15a	2
Medulla	CD_vs_HC	CD up	GO:1902932	positive regulation of alcohol biosynthetic process	2/105	30/28891	0.005326	0.04072	0.02928	Fdps/Snca	2
Medulla	CD_vs_HC	CD up	GO:0007612	learning	4/105	192/28891	0.005362	0.04085	0.02937	Shank2/Shank3/Slc24a2/Tac1	4
Medulla	CD_vs_HC	CD up	GO:0051650	establishment of vesicle localization	4/105	193/28891	0.005461	0.04145	0.0298	Ahi1/Hap1/Kif1a/Snca	4
Medulla	CD_vs_HC	CD up	GO:0006835	dicarboxylic acid transport	3/105	98/28891	0.005525	0.04179	0.03004	Slc17a7/Slc1a3/Snca	3
Medulla	CD_vs_HC	CD up	GO:0046887	positive regulation of hormone secretion	4/105	194/28891	0.00556	0.0419	0.03013	Adcyap1/Baiap3/Itpr1/Tac1	4
Medulla	CD_vs_HC	CD up	GO:0003085	negative regulation of systemic arterial blood pressure	2/105	31/28891	0.005679	0.04219	0.03034	Calca/Tac1	2
Medulla	CD_vs_HC	CD up	GO:0031629	synaptic vesicle fusion to presynaptic active zone membrane	2/105	31/28891	0.005679	0.04219	0.03034	Cplx2/Syt1	2
Medulla	CD_vs_HC	CD up	GO:0043276	anoikis	2/105	31/28891	0.005679	0.04219	0.03034	Bcl2l1/Pdk4	2
Medulla	CD_vs_HC	CD up	GO:0045762	positive regulation of adenylate cyclase activity	2/105	31/28891	0.005679	0.04219	0.03034	Adcyap1/Calca	2
Medulla	CD_vs_HC	CD up	GO:0003333	amino acid transmembrane transport	3/105	100/28891	0.005843	0.04326	0.0311	Slc17a7/Slc1a3/Slc7a5	3
Medulla	CD_vs_HC	CD up	GO:0008016	regulation of heart contraction	4/105	197/28891	0.005867	0.04328	0.03112	Ank2/Cacna1g/Gaa/Tac1	4
Medulla	CD_vs_HC	CD up	GO:0072659	protein localization to plasma membrane	5/105	315/28891	0.005935	0.04363	0.03137	Ank2/Bcl2l1/Camk2b/Rab3c/Vamp2	5
Medulla	CD_vs_HC	CD up	GO:0007271	synaptic transmission, cholinergic	2/105	32/28891	0.006044	0.04396	0.03161	Camk2b/Tac1	2
Medulla	CD_vs_HC	CD up	GO:0048011	neurotrophin TRK receptor signaling pathway	2/105	32/28891	0.006044	0.04396	0.03161	Hap1/Ndn	2
Medulla	CD_vs_HC	CD up	GO:0099500	vesicle fusion to plasma membrane	2/105	32/28891	0.006044	0.04396	0.03161	Cplx2/Syt1	2
Medulla	CD_vs_HC	CD up	GO:0015850	organic hydroxy compound transport	5/105	318/28891	0.006173	0.04475	0.03217	Pcp4/Snca/Sncg/Syt1/Tac1	5
Medulla	CD_vs_HC	CD up	GO:0007204	positive regulation of cytosolic calcium ion concentration	4/105	202/28891	0.006402	0.04625	0.03325	Adcyap1/Cacna1g/Itpr1/Tac1	4
Medulla	CD_vs_HC	CD up	GO:0006469	negative regulation of protein kinase activity	4/105	204/28891	0.006624	0.04769	0.03429	Cdk5rap1/Cdkn1a/Dbndd2/Pcp4	4
Medulla	CD_vs_HC	CD up	GO:0001558	regulation of cell growth	6/105	459/28891	0.006685	0.04796	0.03448	Adipor2/Cdkn1a/Fam107a/Fdps/Gng4/Syt1	6
Medulla	CD_vs_HC	CD up	GO:0007097	nuclear migration	2/105	34/28891	0.006804	0.04865	0.03498	Kif1a/Sun1	2
Medulla	CD_vs_HC	CD up	GO:0006720	isoprenoid metabolic process	3/105	106/28891	0.006863	0.0489	0.03516	Fdps/Hmgcs1/Idi1	3
Medulla	CD_vs_HC	CD up	GO:0016358	dendrite development	5/105	327/28891	0.006925	0.04918	0.03536	Camk2b/Dpysl5/Kif1a/Lzts3/Shank3	5
Medulla	CD_vs_HC	CD down	GO:0002181	cytoplasmic translation	70/287	148/28891	7.342e-102	2.179e-98	1.969e-98	Fau/Rpl10a/Rpl11/Rpl12/Rpl13/Rpl13a/Rpl14/Rpl15/Rpl17/Rpl18/Rpl18a/Rpl19/Rpl21/Rpl22/Rpl22l1/Rpl23/Rpl23a/Rpl24/Rpl26/Rpl27/Rpl27a/Rpl28/Rpl29/Rpl3/Rpl30/Rpl31/Rpl32/Rpl34/Rpl35a/Rpl36/Rpl36a/Rpl37a/Rpl38/Rpl39/Rpl41/Rpl7/Rpl8/Rpl9/Rplp0/Rplp1/Rplp2/Rps10/Rps11/Rps12/Rps13/Rps14/Rps15/Rps15a/Rps16/Rps17/Rps18/Rps19/Rps20/Rps21/Rps23/Rps24/Rps25/Rps26/Rps27a/Rps28/Rps29/Rps3/Rps3a1/Rps4x/Rps5/Rps6…	70
Medulla	CD_vs_HC	CD down	GO:0140236	translation at presynapse	42/287	47/28891	4.887e-80	7.252e-77	6.553e-77	Rpl10/Rpl10a/Rpl12/Rpl13/Rpl13a/Rpl14/Rpl15/Rpl17/Rpl22/Rpl23/Rpl23a/Rpl24/Rpl26/Rpl27/Rpl27a/Rpl28/Rpl29/Rpl32/Rpl34/Rpl35/Rpl35a/Rpl36/Rpl36a/Rpl37/Rpl37a/Rpl38/Rpl7/Rpl8/Rpl9/Rplp2/Rps10/Rps11/Rps12/Rps14/Rps15a/Rps16/Rps24/Rps26/Rps27/Rps27a/Rps28/Rps5	42
Medulla	CD_vs_HC	CD down	GO:0140241	translation at synapse	42/287	48/28891	3.877e-79	2.877e-76	2.6e-76	Rpl10/Rpl10a/Rpl12/Rpl13/Rpl13a/Rpl14/Rpl15/Rpl17/Rpl22/Rpl23/Rpl23a/Rpl24/Rpl26/Rpl27/Rpl27a/Rpl28/Rpl29/Rpl32/Rpl34/Rpl35/Rpl35a/Rpl36/Rpl36a/Rpl37/Rpl37a/Rpl38/Rpl7/Rpl8/Rpl9/Rplp2/Rps10/Rps11/Rps12/Rps14/Rps15a/Rps16/Rps24/Rps26/Rps27/Rps27a/Rps28/Rps5	42
Medulla	CD_vs_HC	CD down	GO:0140242	translation at postsynapse	42/287	48/28891	3.877e-79	2.877e-76	2.6e-76	Rpl10/Rpl10a/Rpl12/Rpl13/Rpl13a/Rpl14/Rpl15/Rpl17/Rpl22/Rpl23/Rpl23a/Rpl24/Rpl26/Rpl27/Rpl27a/Rpl28/Rpl29/Rpl32/Rpl34/Rpl35/Rpl35a/Rpl36/Rpl36a/Rpl37/Rpl37a/Rpl38/Rpl7/Rpl8/Rpl9/Rplp2/Rps10/Rps11/Rps12/Rps14/Rps15a/Rps16/Rps24/Rps26/Rps27/Rps27a/Rps28/Rps5	42
Medulla	CD_vs_HC	CD down	GO:0006119	oxidative phosphorylation	36/287	147/28891	8.332e-40	4.946e-37	4.469e-37	Chchd10/Chchd2/Cox4i1/Cox5a/Cox7a2/Cox7b/Cox7c/Cox8a/Cox8b/Cyc1/Cycs/Dnajc15/Iscu/Ndufa12/Ndufa13/Ndufa2/Ndufa5/Ndufa6/Ndufab1/Ndufb10/Ndufb2/Ndufb3/Ndufb4/Ndufb5/Ndufb8/Ndufb9/Ndufc1/Ndufs5/Ndufs6/Ndufs8/Ndufv2/Uqcc2/Uqcr10/Uqcrb/Uqcrh/Uqcrq	36
Medulla	CD_vs_HC	CD down	GO:0009060	aerobic respiration	38/287	196/28891	8.441e-38	4.175e-35	3.773e-35	Chchd10/Chchd2/Cox4i1/Cox5a/Cox7a2/Cox7b/Cox7c/Cox8a/Cox8b/Cyc1/Cycs/Dnajc15/Iscu/Ndufa12/Ndufa13/Ndufa2/Ndufa5/Ndufa6/Ndufab1/Ndufb10/Ndufb2/Ndufb3/Ndufb4/Ndufb5/Ndufb8/Ndufb9/Ndufc1/Ndufs5/Ndufs6/Ndufs8/Ndufv2/Ogdh/Suclg1/Uqcc2/Uqcr10/Uqcrb/Uqcrh/Uqcrq	38
Medulla	CD_vs_HC	CD down	GO:0045333	cellular respiration	41/287	254/28891	2.544e-37	1.079e-34	9.747e-35	Chchd10/Chchd2/Cox4i1/Cox5a/Cox7a2/Cox7b/Cox7c/Cox8a/Cox8b/Cyc1/Cycs/Dnajc15/Hoxb3os/Iscu/Mtln/Ndufa12/Ndufa13/Ndufa2/Ndufa5/Ndufa6/Ndufab1/Ndufb10/Ndufb2/Ndufb3/Ndufb4/Ndufb5/Ndufb8/Ndufb9/Ndufc1/Ndufs5/Ndufs6/Ndufs8/Ndufv2/Ogdh/Sdhaf4/Suclg1/Uqcc2/Uqcr10/Uqcrb/Uqcrh/Uqcrq	41
Medulla	CD_vs_HC	CD down	GO:0015980	energy derivation by oxidation of organic compounds	42/287	350/28891	9.817e-33	3.642e-30	3.291e-30	Chchd10/Chchd2/Cox4i1/Cox5a/Cox7a2/Cox7b/Cox7c/Cox8a/Cox8b/Cyc1/Cycs/Dnajc15/Hoxb3os/Iscu/Mt3/Mtln/Ndufa12/Ndufa13/Ndufa2/Ndufa5/Ndufa6/Ndufab1/Ndufb10/Ndufb2/Ndufb3/Ndufb4/Ndufb5/Ndufb8/Ndufb9/Ndufc1/Ndufs5/Ndufs6/Ndufs8/Ndufv2/Ogdh/Sdhaf4/Suclg1/Uqcc2/Uqcr10/Uqcrb/Uqcrh/Uqcrq	42
Medulla	CD_vs_HC	CD down	GO:0006091	generation of precursor metabolites and energy	45/287	484/28891	3.507e-30	1.157e-27	1.045e-27	Chchd10/Chchd2/Cox17/Cox4i1/Cox5a/Cox7a2/Cox7b/Cox7c/Cox8a/Cox8b/Cyc1/Cycs/Dnajc15/Hoxb3os/Hsd11b1/Iscu/Mt3/Mtln/Ndufa12/Ndufa13/Ndufa2/Ndufa4/Ndufa5/Ndufa6/Ndufab1/Ndufb10/Ndufb2/Ndufb3/Ndufb4/Ndufb5/Ndufb8/Ndufb9/Ndufc1/Ndufs5/Ndufs6/Ndufs8/Ndufv2/Ogdh/Sdhaf4/Suclg1/Uqcc2/Uqcr10/Uqcrb/Uqcrh/Uqcrq	45
Medulla	CD_vs_HC	CD down	GO:0042254	ribosome biogenesis	36/287	322/28891	4.788e-27	1.421e-24	1.284e-24	Fau/Glul/Rpl10/Rpl10a/Rpl11/Rpl14/Rpl23a/Rpl24/Rpl26/Rpl27/Rpl35/Rpl35a/Rpl38/Rpl7/Rplp0/Rps11/Rps12/Rps13/Rps14/Rps15/Rps15a/Rps16/Rps17/Rps19/Rps21/Rps23/Rps24/Rps25/Rps27/Rps28/Rps3a1/Rps5/Rps6/Rps7/Rps8/Rps9	36
Medulla	CD_vs_HC	CD down	GO:0022900	electron transport chain	25/287	116/28891	2.125e-26	5.732e-24	5.18e-24	Chchd2/Cox4i1/Cox5a/Cox7a2/Cox7b/Cox7c/Cox8a/Cox8b/Cyc1/Cycs/Dnajc15/Hoxb3os/Iscu/Ndufa12/Ndufa5/Ndufb3/Ndufb8/Ndufb9/Ndufs6/Ndufs8/Ndufv2/Uqcr10/Uqcrb/Uqcrh/Uqcrq	25
Medulla	CD_vs_HC	CD down	GO:0022904	respiratory electron transport chain	24/287	106/28891	6.053e-26	1.414e-23	1.278e-23	Chchd2/Cox4i1/Cox5a/Cox7a2/Cox7b/Cox7c/Cox8a/Cox8b/Cyc1/Cycs/Dnajc15/Hoxb3os/Iscu/Ndufa12/Ndufa5/Ndufb8/Ndufb9/Ndufs6/Ndufs8/Ndufv2/Uqcr10/Uqcrb/Uqcrh/Uqcrq	24
Medulla	CD_vs_HC	CD down	GO:0042775	mitochondrial ATP synthesis coupled electron transport	22/287	80/28891	6.195e-26	1.414e-23	1.278e-23	Chchd2/Cox4i1/Cox5a/Cox7a2/Cox7b/Cox7c/Cox8a/Cox8b/Cyc1/Cycs/Dnajc15/Iscu/Ndufa12/Ndufb8/Ndufb9/Ndufs6/Ndufs8/Ndufv2/Uqcr10/Uqcrb/Uqcrh/Uqcrq	22
Medulla	CD_vs_HC	CD down	GO:0042773	ATP synthesis coupled electron transport	22/287	82/28891	1.142e-25	2.421e-23	2.188e-23	Chchd2/Cox4i1/Cox5a/Cox7a2/Cox7b/Cox7c/Cox8a/Cox8b/Cyc1/Cycs/Dnajc15/Iscu/Ndufa12/Ndufb8/Ndufb9/Ndufs6/Ndufs8/Ndufv2/Uqcr10/Uqcrb/Uqcrh/Uqcrq	22
Medulla	CD_vs_HC	CD down	GO:0019646	aerobic electron transport chain	20/287	64/28891	5.951e-25	1.177e-22	1.064e-22	Cox4i1/Cox5a/Cox7a2/Cox7b/Cox7c/Cox8a/Cox8b/Cyc1/Cycs/Dnajc15/Iscu/Ndufb8/Ndufb9/Ndufs6/Ndufs8/Ndufv2/Uqcr10/Uqcrb/Uqcrh/Uqcrq	20
Medulla	CD_vs_HC	CD down	GO:0042274	ribosomal small subunit biogenesis	23/287	104/28891	1.179e-24	2.187e-22	1.976e-22	Fau/Rpl38/Rps11/Rps12/Rps13/Rps14/Rps15/Rps15a/Rps16/Rps17/Rps19/Rps21/Rps23/Rps24/Rps25/Rps27/Rps28/Rps3a1/Rps5/Rps6/Rps7/Rps8/Rps9	23
Medulla	CD_vs_HC	CD down	GO:0022613	ribonucleoprotein complex biogenesis	38/287	440/28891	2.105e-24	3.676e-22	3.322e-22	Fau/Glul/Hsp90aa1/Rpl10/Rpl10a/Rpl11/Rpl13a/Rpl14/Rpl23a/Rpl24/Rpl26/Rpl27/Rpl35/Rpl35a/Rpl38/Rpl7/Rplp0/Rps11/Rps12/Rps13/Rps14/Rps15/Rps15a/Rps16/Rps17/Rps19/Rps21/Rps23/Rps24/Rps25/Rps27/Rps28/Rps3a1/Rps5/Rps6/Rps7/Rps8/Rps9	38
Medulla	CD_vs_HC	CD down	GO:0042776	proton motive force-driven mitochondrial ATP synthesis	18/287	65/28891	1.7e-21	2.803e-19	2.533e-19	Ndufa12/Ndufa13/Ndufa2/Ndufa5/Ndufa6/Ndufab1/Ndufb10/Ndufb2/Ndufb3/Ndufb4/Ndufb5/Ndufb8/Ndufb9/Ndufc1/Ndufs5/Ndufs6/Ndufs8/Ndufv2	18
Medulla	CD_vs_HC	CD down	GO:0015986	proton motive force-driven ATP synthesis	18/287	70/28891	7.572e-21	1.183e-18	1.069e-18	Ndufa12/Ndufa13/Ndufa2/Ndufa5/Ndufa6/Ndufab1/Ndufb10/Ndufb2/Ndufb3/Ndufb4/Ndufb5/Ndufb8/Ndufb9/Ndufc1/Ndufs5/Ndufs6/Ndufs8/Ndufv2	18
Medulla	CD_vs_HC	CD down	GO:0033108	mitochondrial respiratory chain complex assembly	20/287	104/28891	2.719e-20	4.035e-18	3.646e-18	Cox17/Ndufa12/Ndufa13/Ndufa2/Ndufa5/Ndufa6/Ndufab1/Ndufb10/Ndufb2/Ndufb3/Ndufb4/Ndufb5/Ndufb8/Ndufb9/Ndufc1/Ndufs5/Ndufs6/Ndufs8/Sdhaf4/Uqcc2	20
Medulla	CD_vs_HC	CD down	GO:0010257	NADH dehydrogenase complex assembly	17/287	65/28891	6.755e-20	9.113e-18	8.235e-18	Ndufa12/Ndufa13/Ndufa2/Ndufa5/Ndufa6/Ndufab1/Ndufb10/Ndufb2/Ndufb3/Ndufb4/Ndufb5/Ndufb8/Ndufb9/Ndufc1/Ndufs5/Ndufs6/Ndufs8	17
Medulla	CD_vs_HC	CD down	GO:0032981	mitochondrial respiratory chain complex I assembly	17/287	65/28891	6.755e-20	9.113e-18	8.235e-18	Ndufa12/Ndufa13/Ndufa2/Ndufa5/Ndufa6/Ndufab1/Ndufb10/Ndufb2/Ndufb3/Ndufb4/Ndufb5/Ndufb8/Ndufb9/Ndufc1/Ndufs5/Ndufs6/Ndufs8	17
Medulla	CD_vs_HC	CD down	GO:0046034	ATP metabolic process	20/287	135/28891	6.115e-18	7.891e-16	7.131e-16	Atp1a2/Fis1/Ndufa12/Ndufa13/Ndufa2/Ndufa5/Ndufa6/Ndufab1/Ndufb10/Ndufb2/Ndufb3/Ndufb4/Ndufb5/Ndufb8/Ndufb9/Ndufc1/Ndufs5/Ndufs6/Ndufs8/Ndufv2	20
Medulla	CD_vs_HC	CD down	GO:0006754	ATP biosynthetic process	18/287	101/28891	9.253e-18	1.144e-15	1.034e-15	Ndufa12/Ndufa13/Ndufa2/Ndufa5/Ndufa6/Ndufab1/Ndufb10/Ndufb2/Ndufb3/Ndufb4/Ndufb5/Ndufb8/Ndufb9/Ndufc1/Ndufs5/Ndufs6/Ndufs8/Ndufv2	18
Medulla	CD_vs_HC	CD down	GO:0009206	purine ribonucleoside triphosphate biosynthetic process	18/287	113/28891	7.521e-17	8.929e-15	8.069e-15	Ndufa12/Ndufa13/Ndufa2/Ndufa5/Ndufa6/Ndufab1/Ndufb10/Ndufb2/Ndufb3/Ndufb4/Ndufb5/Ndufb8/Ndufb9/Ndufc1/Ndufs5/Ndufs6/Ndufs8/Ndufv2	18
Medulla	CD_vs_HC	CD down	GO:0009145	purine nucleoside triphosphate biosynthetic process	18/287	114/28891	8.852e-17	1.011e-14	9.132e-15	Ndufa12/Ndufa13/Ndufa2/Ndufa5/Ndufa6/Ndufab1/Ndufb10/Ndufb2/Ndufb3/Ndufb4/Ndufb5/Ndufb8/Ndufb9/Ndufc1/Ndufs5/Ndufs6/Ndufs8/Ndufv2	18
Medulla	CD_vs_HC	CD down	GO:0042255	ribosome assembly	15/287	66/28891	1.069e-16	1.175e-14	1.062e-14	Fau/Rpl10/Rpl11/Rpl23a/Rpl24/Rpl38/Rplp0/Rps14/Rps15/Rps19/Rps25/Rps27/Rps28/Rps5/Rps6	15
Medulla	CD_vs_HC	CD down	GO:0009201	ribonucleoside triphosphate biosynthetic process	18/287	118/28891	1.672e-16	1.772e-14	1.602e-14	Ndufa12/Ndufa13/Ndufa2/Ndufa5/Ndufa6/Ndufab1/Ndufb10/Ndufb2/Ndufb3/Ndufb4/Ndufb5/Ndufb8/Ndufb9/Ndufc1/Ndufs5/Ndufs6/Ndufs8/Ndufv2	18
Medulla	CD_vs_HC	CD down	GO:0009205	purine ribonucleoside triphosphate metabolic process	20/287	160/28891	1.866e-16	1.91e-14	1.726e-14	Atp1a2/Fis1/Ndufa12/Ndufa13/Ndufa2/Ndufa5/Ndufa6/Ndufab1/Ndufb10/Ndufb2/Ndufb3/Ndufb4/Ndufb5/Ndufb8/Ndufb9/Ndufc1/Ndufs5/Ndufs6/Ndufs8/Ndufv2	20
Medulla	CD_vs_HC	CD down	GO:0009142	nucleoside triphosphate biosynthetic process	18/287	124/28891	4.15e-16	4.105e-14	3.71e-14	Ndufa12/Ndufa13/Ndufa2/Ndufa5/Ndufa6/Ndufab1/Ndufb10/Ndufb2/Ndufb3/Ndufb4/Ndufb5/Ndufb8/Ndufb9/Ndufc1/Ndufs5/Ndufs6/Ndufs8/Ndufv2	18
Medulla	CD_vs_HC	CD down	GO:0009199	ribonucleoside triphosphate metabolic process	20/287	167/28891	4.359e-16	4.173e-14	3.771e-14	Atp1a2/Fis1/Ndufa12/Ndufa13/Ndufa2/Ndufa5/Ndufa6/Ndufab1/Ndufb10/Ndufb2/Ndufb3/Ndufb4/Ndufb5/Ndufb8/Ndufb9/Ndufc1/Ndufs5/Ndufs6/Ndufs8/Ndufv2	20
Medulla	CD_vs_HC	CD down	GO:0009144	purine nucleoside triphosphate metabolic process	20/287	169/28891	5.513e-16	5.114e-14	4.621e-14	Atp1a2/Fis1/Ndufa12/Ndufa13/Ndufa2/Ndufa5/Ndufa6/Ndufab1/Ndufb10/Ndufb2/Ndufb3/Ndufb4/Ndufb5/Ndufb8/Ndufb9/Ndufc1/Ndufs5/Ndufs6/Ndufs8/Ndufv2	20
Medulla	CD_vs_HC	CD down	GO:0072521	purine-containing compound metabolic process	30/287	479/28891	1.334e-15	1.196e-13	1.081e-13	Atp1a2/Fis1/Hint1/Hsd11b1/Ldhb/Mpc1/Mpc2/Ndufa12/Ndufa13/Ndufa2/Ndufa5/Ndufa6/Ndufab1/Ndufb10/Ndufb2/Ndufb3/Ndufb4/Ndufb5/Ndufb8/Ndufb9/Ndufc1/Ndufs5/Ndufs6/Ndufs8/Ndufv2/Nudt4/Ogdh/Prdx5/Suclg1/Ttr	30
Medulla	CD_vs_HC	CD down	GO:0006163	purine nucleotide metabolic process	29/287	444/28891	1.37e-15	1.196e-13	1.081e-13	Atp1a2/Fis1/Hint1/Hsd11b1/Ldhb/Mpc1/Mpc2/Ndufa12/Ndufa13/Ndufa2/Ndufa5/Ndufa6/Ndufab1/Ndufb10/Ndufb2/Ndufb3/Ndufb4/Ndufb5/Ndufb8/Ndufb9/Ndufc1/Ndufs5/Ndufs6/Ndufs8/Ndufv2/Nudt4/Ogdh/Prdx5/Suclg1	29
Medulla	CD_vs_HC	CD down	GO:0009150	purine ribonucleotide metabolic process	26/287	345/28891	1.464e-15	1.241e-13	1.122e-13	Atp1a2/Fis1/Hint1/Mpc1/Mpc2/Ndufa12/Ndufa13/Ndufa2/Ndufa5/Ndufa6/Ndufab1/Ndufb10/Ndufb2/Ndufb3/Ndufb4/Ndufb5/Ndufb8/Ndufb9/Ndufc1/Ndufs5/Ndufs6/Ndufs8/Ndufv2/Nudt4/Ogdh/Suclg1	26
Medulla	CD_vs_HC	CD down	GO:0000028	ribosomal small subunit assembly	10/287	21/28891	2.562e-15	2.112e-13	1.909e-13	Fau/Rpl38/Rps14/Rps15/Rps19/Rps25/Rps27/Rps28/Rps5/Rps6	10
Medulla	CD_vs_HC	CD down	GO:0009141	nucleoside triphosphate metabolic process	20/287	184/28891	2.92e-15	2.342e-13	2.116e-13	Atp1a2/Fis1/Ndufa12/Ndufa13/Ndufa2/Ndufa5/Ndufa6/Ndufab1/Ndufb10/Ndufb2/Ndufb3/Ndufb4/Ndufb5/Ndufb8/Ndufb9/Ndufc1/Ndufs5/Ndufs6/Ndufs8/Ndufv2	20
Medulla	CD_vs_HC	CD down	GO:0009259	ribonucleotide metabolic process	26/287	364/28891	5.256e-15	4.105e-13	3.71e-13	Atp1a2/Fis1/Hint1/Mpc1/Mpc2/Ndufa12/Ndufa13/Ndufa2/Ndufa5/Ndufa6/Ndufab1/Ndufb10/Ndufb2/Ndufb3/Ndufb4/Ndufb5/Ndufb8/Ndufb9/Ndufc1/Ndufs5/Ndufs6/Ndufs8/Ndufv2/Nudt4/Ogdh/Suclg1	26
Medulla	CD_vs_HC	CD down	GO:0019693	ribose phosphate metabolic process	26/287	373/28891	9.372e-15	7.132e-13	6.445e-13	Atp1a2/Fis1/Hint1/Mpc1/Mpc2/Ndufa12/Ndufa13/Ndufa2/Ndufa5/Ndufa6/Ndufab1/Ndufb10/Ndufb2/Ndufb3/Ndufb4/Ndufb5/Ndufb8/Ndufb9/Ndufc1/Ndufs5/Ndufs6/Ndufs8/Ndufv2/Nudt4/Ogdh/Suclg1	26
Medulla	CD_vs_HC	CD down	GO:0009152	purine ribonucleotide biosynthetic process	20/287	198/28891	1.209e-14	8.971e-13	8.107e-13	Mpc1/Mpc2/Ndufa12/Ndufa13/Ndufa2/Ndufa5/Ndufa6/Ndufab1/Ndufb10/Ndufb2/Ndufb3/Ndufb4/Ndufb5/Ndufb8/Ndufb9/Ndufc1/Ndufs5/Ndufs6/Ndufs8/Ndufv2	20
Medulla	CD_vs_HC	CD down	GO:0009117	nucleotide metabolic process	29/287	497/28891	2.508e-14	1.816e-12	1.641e-12	Atp1a2/Fis1/Hint1/Hsd11b1/Ldhb/Mpc1/Mpc2/Ndufa12/Ndufa13/Ndufa2/Ndufa5/Ndufa6/Ndufab1/Ndufb10/Ndufb2/Ndufb3/Ndufb4/Ndufb5/Ndufb8/Ndufb9/Ndufc1/Ndufs5/Ndufs6/Ndufs8/Ndufv2/Nudt4/Ogdh/Prdx5/Suclg1	29
Medulla	CD_vs_HC	CD down	GO:0009260	ribonucleotide biosynthetic process	20/287	210/28891	3.739e-14	2.642e-12	2.388e-12	Mpc1/Mpc2/Ndufa12/Ndufa13/Ndufa2/Ndufa5/Ndufa6/Ndufab1/Ndufb10/Ndufb2/Ndufb3/Ndufb4/Ndufb5/Ndufb8/Ndufb9/Ndufc1/Ndufs5/Ndufs6/Ndufs8/Ndufv2	20
Medulla	CD_vs_HC	CD down	GO:0006364	rRNA processing	20/287	215/28891	5.856e-14	4.042e-12	3.653e-12	Rpl10a/Rpl11/Rpl14/Rpl26/Rpl27/Rpl35/Rpl35a/Rpl7/Rps15/Rps16/Rps17/Rps19/Rps21/Rps24/Rps25/Rps27/Rps28/Rps6/Rps7/Rps8	20
Medulla	CD_vs_HC	CD down	GO:0046390	ribose phosphate biosynthetic process	20/287	218/28891	7.622e-14	5.141e-12	4.646e-12	Mpc1/Mpc2/Ndufa12/Ndufa13/Ndufa2/Ndufa5/Ndufa6/Ndufab1/Ndufb10/Ndufb2/Ndufb3/Ndufb4/Ndufb5/Ndufb8/Ndufb9/Ndufc1/Ndufs5/Ndufs6/Ndufs8/Ndufv2	20
Medulla	CD_vs_HC	CD down	GO:0006164	purine nucleotide biosynthetic process	20/287	233/28891	2.68e-13	1.768e-11	1.597e-11	Mpc1/Mpc2/Ndufa12/Ndufa13/Ndufa2/Ndufa5/Ndufa6/Ndufab1/Ndufb10/Ndufb2/Ndufb3/Ndufb4/Ndufb5/Ndufb8/Ndufb9/Ndufc1/Ndufs5/Ndufs6/Ndufs8/Ndufv2	20
Medulla	CD_vs_HC	CD down	GO:0072522	purine-containing compound biosynthetic process	20/287	241/28891	5.047e-13	3.256e-11	2.943e-11	Mpc1/Mpc2/Ndufa12/Ndufa13/Ndufa2/Ndufa5/Ndufa6/Ndufab1/Ndufb10/Ndufb2/Ndufb3/Ndufb4/Ndufb5/Ndufb8/Ndufb9/Ndufc1/Ndufs5/Ndufs6/Ndufs8/Ndufv2	20
Medulla	CD_vs_HC	CD down	GO:0016072	rRNA metabolic process	20/287	252/28891	1.159e-12	7.319e-11	6.614e-11	Rpl10a/Rpl11/Rpl14/Rpl26/Rpl27/Rpl35/Rpl35a/Rpl7/Rps15/Rps16/Rps17/Rps19/Rps21/Rps24/Rps25/Rps27/Rps28/Rps6/Rps7/Rps8	20
Medulla	CD_vs_HC	CD down	GO:0022618	protein-RNA complex assembly	17/287	175/28891	2.324e-12	1.437e-10	1.299e-10	Fau/Hsp90aa1/Rpl10/Rpl11/Rpl13a/Rpl23a/Rpl24/Rpl38/Rplp0/Rps14/Rps15/Rps19/Rps25/Rps27/Rps28/Rps5/Rps6	17
Medulla	CD_vs_HC	CD down	GO:0009165	nucleotide biosynthetic process	20/287	267/28891	3.372e-12	2.043e-10	1.846e-10	Mpc1/Mpc2/Ndufa12/Ndufa13/Ndufa2/Ndufa5/Ndufa6/Ndufab1/Ndufb10/Ndufb2/Ndufb3/Ndufb4/Ndufb5/Ndufb8/Ndufb9/Ndufc1/Ndufs5/Ndufs6/Ndufs8/Ndufv2	20
Medulla	CD_vs_HC	CD down	GO:1901293	nucleoside phosphate biosynthetic process	20/287	269/28891	3.868e-12	2.296e-10	2.075e-10	Mpc1/Mpc2/Ndufa12/Ndufa13/Ndufa2/Ndufa5/Ndufa6/Ndufab1/Ndufb10/Ndufb2/Ndufb3/Ndufb4/Ndufb5/Ndufb8/Ndufb9/Ndufc1/Ndufs5/Ndufs6/Ndufs8/Ndufv2	20
Medulla	CD_vs_HC	CD down	GO:0071826	protein-RNA complex organization	17/287	183/28891	4.799e-12	2.793e-10	2.524e-10	Fau/Hsp90aa1/Rpl10/Rpl11/Rpl13a/Rpl23a/Rpl24/Rpl38/Rplp0/Rps14/Rps15/Rps19/Rps25/Rps27/Rps28/Rps5/Rps6	17
Medulla	CD_vs_HC	CD down	GO:0006123	mitochondrial electron transport, cytochrome c to oxygen	8/287	19/28891	5.914e-12	3.375e-10	3.05e-10	Cox4i1/Cox5a/Cox7a2/Cox7b/Cox7c/Cox8a/Cox8b/Cycs	8
Medulla	CD_vs_HC	CD down	GO:0042273	ribosomal large subunit biogenesis	12/287	76/28891	1.293e-11	7.241e-10	6.544e-10	Rpl10/Rpl10a/Rpl11/Rpl14/Rpl23a/Rpl24/Rpl26/Rpl35/Rpl35a/Rpl38/Rpl7/Rplp0	12
Medulla	CD_vs_HC	CD down	GO:0006122	mitochondrial electron transport, ubiquinol to cytochrome c	6/287	13/28891	1.476e-09	8.114e-08	7.332e-08	Cyc1/Cycs/Uqcr10/Uqcrb/Uqcrh/Uqcrq	6
Medulla	CD_vs_HC	CD down	GO:0140694	non-membrane-bounded organelle assembly	20/287	402/28891	4.679e-09	2.525e-07	2.282e-07	Csrp1/Dazap2/Fau/Mapk9/Rpl10/Rpl11/Rpl23a/Rpl24/Rpl38/Rplp0/Rps14/Rps15/Rps19/Rps23/Rps25/Rps27/Rps28/Rps3/Rps5/Rps6	20
Medulla	CD_vs_HC	CD down	GO:0034470	ncRNA processing	20/287	413/28891	7.376e-09	3.909e-07	3.533e-07	Rpl10a/Rpl11/Rpl14/Rpl26/Rpl27/Rpl35/Rpl35a/Rpl7/Rps15/Rps16/Rps17/Rps19/Rps21/Rps24/Rps25/Rps27/Rps28/Rps6/Rps7/Rps8	20
Medulla	CD_vs_HC	CD down	GO:0006120	mitochondrial electron transport, NADH to ubiquinone	7/287	29/28891	1.149e-08	5.981e-07	5.405e-07	Dnajc15/Iscu/Ndufb8/Ndufb9/Ndufs6/Ndufs8/Ndufv2	7
Medulla	CD_vs_HC	CD down	GO:1901798	positive regulation of signal transduction by p53 class mediator	7/287	33/28891	3.039e-08	1.555e-06	1.405e-06	Rpl11/Rpl23/Rpl26/Rpl37/Rps15/Rps20/Rps7	7
Medulla	CD_vs_HC	CD down	GO:0000027	ribosomal large subunit assembly	6/287	26/28891	1.777e-07	8.938e-06	8.077e-06	Rpl10/Rpl11/Rpl23a/Rpl24/Rpl38/Rplp0	6
Medulla	CD_vs_HC	CD down	GO:0006979	response to oxidative stress	17/287	389/28891	4.302e-07	2.128e-05	1.923e-05	Aldh1a1/Apoe/Chchd2/Cryab/Gpr37/Gpr37l1/Gpx4/Mapk9/Mt3/Ndufa12/Ndufa6/Ndufb4/Ndufs8/Prdx5/Prdx6/Rps3/Rwdd1	17
Medulla	CD_vs_HC	CD down	GO:1905907	negative regulation of amyloid fibril formation	4/287	12/28891	4.434e-06	0.0002157	0.0001949	Apoe/Cryab/Pfdn2/Pfdn5	4
Medulla	CD_vs_HC	CD down	GO:0034101	erythrocyte homeostasis	10/287	168/28891	7.57e-06	0.0003624	0.0003275	Cd24a/Hba-a1/Hba-a2/Mafb/Rps14/Rps17/Rps19/Rps24/Rps6/Slc25a5	10
Medulla	CD_vs_HC	CD down	GO:0042744	hydrogen peroxide catabolic process	5/287	30/28891	1.086e-05	0.0005117	0.0004624	Hba-a1/Hbb-bt/Mt3/Prdx5/Prdx6	5
Medulla	CD_vs_HC	CD down	GO:1905906	regulation of amyloid fibril formation	4/287	16/28891	1.58e-05	0.0007326	0.000662	Apoe/Cryab/Pfdn2/Pfdn5	4
Medulla	CD_vs_HC	CD down	GO:1901796	regulation of signal transduction by p53 class mediator	7/287	85/28891	2.26e-05	0.001032	0.0009327	Rpl11/Rpl23/Rpl26/Rpl37/Rps15/Rps20/Rps7	7
Medulla	CD_vs_HC	CD down	GO:0042743	hydrogen peroxide metabolic process	6/287	58/28891	2.393e-05	0.001076	0.0009724	Cycs/Hba-a1/Hbb-bt/Mt3/Prdx5/Prdx6	6
Medulla	CD_vs_HC	CD down	GO:0051341	regulation of oxidoreductase activity	7/287	94/28891	4.345e-05	0.001925	0.001739	Apoe/Cox17/Mt3/Ndufa4/Prdx5/S100a1/Sdhaf4	7
Medulla	CD_vs_HC	CD down	GO:0002262	myeloid cell homeostasis	10/287	215/28891	6.304e-05	0.002751	0.002486	Cd24a/Hba-a1/Hba-a2/Mafb/Rps14/Rps17/Rps19/Rps24/Rps6/Slc25a5	10
Medulla	CD_vs_HC	CD down	GO:0030490	maturation of SSU-rRNA	5/287	47/28891	0.0001019	0.004381	0.003959	Rps16/Rps19/Rps21/Rps28/Rps8	5
Medulla	CD_vs_HC	CD down	GO:0044571	[2Fe-2S] cluster assembly	3/287	10/28891	0.0001106	0.004557	0.004118	Glrx5/Iscu/Ndufab1	3
Medulla	CD_vs_HC	CD down	GO:1902255	positive regulation of intrinsic apoptotic signaling pathway by p53 class mediator	3/287	10/28891	0.0001106	0.004557	0.004118	Rpl11/Rpl26/Rps7	3
Medulla	CD_vs_HC	CD down	GO:1904667	negative regulation of ubiquitin protein ligase activity	3/287	10/28891	0.0001106	0.004557	0.004118	Rpl11/Rpl23/Rps7	3
Medulla	CD_vs_HC	CD down	GO:0072331	signal transduction by p53 class mediator	8/287	153/28891	0.0001535	0.006242	0.00564	Hint1/Rpl11/Rpl23/Rpl26/Rpl37/Rps15/Rps20/Rps7	8
Medulla	CD_vs_HC	CD down	GO:0048872	homeostasis of number of cells	13/287	401/28891	0.000209	0.008382	0.007575	Cd24a/Hba-a1/Hba-a2/Mafb/Nfix/Prdx5/Rps14/Rps17/Rps19/Rps24/Rps6/Slc25a5/Sox9	13
Medulla	CD_vs_HC	CD down	GO:1990000	amyloid fibril formation	4/287	30/28891	0.0002132	0.008389	0.007581	Apoe/Cryab/Pfdn2/Pfdn5	4
Medulla	CD_vs_HC	CD down	GO:0051353	positive regulation of oxidoreductase activity	5/287	55/28891	0.0002165	0.008389	0.007581	Apoe/Cox17/Ndufa4/S100a1/Sdhaf4	5
Medulla	CD_vs_HC	CD down	GO:0043467	regulation of generation of precursor metabolites and energy	8/287	161/28891	0.0002176	0.008389	0.007581	Chchd2/Cox17/Cox7a2/Dnajc15/Hsd11b1/Iscu/Ndufa4/Uqcc2	8
Medulla	CD_vs_HC	CD down	GO:0021794	thalamus development	3/287	13/28891	0.0002577	0.009682	0.00875	Ogdh/Olig2/Uqcrq	3
Medulla	CD_vs_HC	CD down	GO:0021860	pyramidal neuron development	3/287	13/28891	0.0002577	0.009682	0.00875	Fgfr2/Ogdh/Uqcrq	3
Medulla	CD_vs_HC	CD down	GO:0140053	mitochondrial gene expression	8/287	166/28891	0.0002678	0.009937	0.00898	Aurkaip1/Chchd10/Lars2/Mrpl18/Mrpl42/Mrps18c/Mrps24/Uqcc2	8
Medulla	CD_vs_HC	CD down	GO:0000462	maturation of SSU-rRNA from tricistronic rRNA transcript (SSU-rRNA, 5.8S rRNA, LSU-rRNA)	4/287	33/28891	0.000311	0.01139	0.0103	Rps16/Rps19/Rps21/Rps8	4
Medulla	CD_vs_HC	CD down	GO:0032543	mitochondrial translation	7/287	130/28891	0.0003312	0.01199	0.01083	Aurkaip1/Lars2/Mrpl18/Mrpl42/Mrps18c/Mrps24/Uqcc2	7
Medulla	CD_vs_HC	CD down	GO:0030099	myeloid cell differentiation	14/287	480/28891	0.000353	0.01262	0.01141	Car2/Hba-a1/Hba-a2/Il33/Lrrc17/Maf/Mafb/Nfix/Rbp1/Rps14/Rps19/Rps6/Slc25a5/Tesc	14
Medulla	CD_vs_HC	CD down	GO:0015670	carbon dioxide transport	3/287	15/28891	0.000404	0.01428	0.0129	Aqp4/Car2/Hba-a1	3
Medulla	CD_vs_HC	CD down	GO:0097193	intrinsic apoptotic signaling pathway	11/287	327/28891	0.0004676	0.01633	0.01475	Cycs/Fis1/Hint1/Hras/Mapk8ip1/Ndufa13/Rpl11/Rpl26/Rps3/Rps7/Tpt1	11
Medulla	CD_vs_HC	CD down	GO:1903715	regulation of aerobic respiration	4/287	37/28891	0.0004865	0.01679	0.01517	Cox7a2/Dnajc15/Iscu/Uqcc2	4
Medulla	CD_vs_HC	CD down	GO:0021781	glial cell fate commitment	3/287	18/28891	0.0007087	0.02364	0.02136	Nfix/Olig2/Sox9	3
Medulla	CD_vs_HC	CD down	GO:0021859	pyramidal neuron differentiation	3/287	18/28891	0.0007087	0.02364	0.02136	Fgfr2/Ogdh/Uqcrq	3
Medulla	CD_vs_HC	CD down	GO:0051444	negative regulation of ubiquitin-protein transferase activity	3/287	18/28891	0.0007087	0.02364	0.02136	Rpl11/Rpl23/Rps7	3
Medulla	CD_vs_HC	CD down	GO:2001242	regulation of intrinsic apoptotic signaling pathway	8/287	194/28891	0.0007536	0.02485	0.02246	Fis1/Mapk8ip1/Ndufa13/Rpl11/Rpl26/Rps3/Rps7/Tpt1	8
Medulla	CD_vs_HC	CD down	GO:0000302	response to reactive oxygen species	8/287	195/28891	0.0007792	0.02541	0.02297	Cryab/Gpr37/Gpr37l1/Mapk9/Mt3/Prdx5/Prdx6/Rps3	8
Medulla	CD_vs_HC	CD down	GO:2001244	positive regulation of intrinsic apoptotic signaling pathway	5/287	73/28891	0.0008086	0.02608	0.02357	Fis1/Rpl11/Rpl26/Rps3/Rps7	5
Medulla	CD_vs_HC	CD down	GO:0015669	gas transport	3/287	19/28891	0.0008355	0.02666	0.02409	Aqp4/Car2/Hba-a1	3
Medulla	CD_vs_HC	CD down	GO:0030218	erythrocyte differentiation	7/287	156/28891	0.0009814	0.03099	0.028	Hba-a1/Hba-a2/Mafb/Rps14/Rps19/Rps6/Slc25a5	7
Medulla	CD_vs_HC	CD down	GO:0034248	regulation of amide metabolic process	13/287	482/28891	0.001163	0.03634	0.03284	Apoe/Bc1/Bin1/Dapk3/Eif1/Hsd11b1/Rpl10/Rpl13a/Rpl26/Rpl38/Rplp1/Rps3/Uqcc2	13
Medulla	CD_vs_HC	CD down	GO:1904062	regulation of monoatomic cation transmembrane transport	11/287	367/28891	0.001199	0.03707	0.0335	Atp1a2/Bin1/Cabp1/Cd63/Cox17/Iscu/Kcnab1/Ndufa4/S100a1/Scn1b/Tesc	11
Medulla	CD_vs_HC	CD down	GO:0051348	negative regulation of transferase activity	9/287	260/28891	0.00124	0.03795	0.03429	Actb/Apoe/Camk2n2/Dtnbp1/Mapk8ip1/Nr2f2/Rpl11/Rpl23/Rps7	9
Medulla	CD_vs_HC	CD down	GO:0034765	regulation of monoatomic ion transmembrane transport	13/287	490/28891	0.001347	0.04081	0.03687	Atp1a2/Bin1/Cabp1/Cd63/Cox17/Hcn2/Iscu/Kcnab1/Kcng4/Ndufa4/S100a1/Scn1b/Tesc	13
Medulla	CD_vs_HC	CD down	GO:0048709	oligodendrocyte differentiation	6/287	123/28891	0.001468	0.04401	0.03977	Il33/Nfix/Olig1/Olig2/Opalin/Sox9	6
Medulla	CD_vs_HC	CD down	GO:1904666	regulation of ubiquitin protein ligase activity	3/287	23/28891	0.001483	0.04401	0.03977	Rpl11/Rpl23/Rps7	3
Medulla	CD_vs_HC	CD down	GO:0043254	regulation of protein-containing complex assembly	12/287	437/28891	0.001534	0.04507	0.04073	Apoe/Bin1/Cd24a/Cdc42ep1/Cryab/Dnajc15/Hsp90aa1/Mapk9/Mtln/Rpl13a/Rps3/Sox9	12
Medulla	CD_vs_HC	CD down	GO:0045116	protein neddylation	3/287	24/28891	0.001682	0.04895	0.04423	Cops9/Rpl11/Ube2m	3
Molecular_layer	CD_vs_HC	CD up	GO:0051968	positive regulation of synaptic transmission, glutamatergic	3/23	42/28891	4.958e-06	0.003356	0.001967	Cacng7/Glul/Shank3	3
Molecular_layer	CD_vs_HC	CD up	GO:0051966	regulation of synaptic transmission, glutamatergic	3/23	88/28891	4.627e-05	0.009283	0.005441	Cacng7/Glul/Shank3	3
Molecular_layer	CD_vs_HC	CD up	GO:0097501	stress response to metal ion	2/23	13/28891	4.703e-05	0.009283	0.005441	Mt1/Mt2	2
Molecular_layer	CD_vs_HC	CD up	GO:0061687	detoxification of inorganic compound	2/23	14/28891	5.485e-05	0.009283	0.005441	Mt1/Mt2	2
Molecular_layer	CD_vs_HC	CD up	GO:0071294	cellular response to zinc ion	2/23	16/28891	7.226e-05	0.009783	0.005735	Mt1/Mt2	2
Molecular_layer	CD_vs_HC	CD up	GO:0071280	cellular response to copper ion	2/23	18/28891	9.204e-05	0.01038	0.006087	Mt1/Mt2	2
Molecular_layer	CD_vs_HC	CD up	GO:0008306	associative learning	3/23	123/28891	0.0001253	0.01175	0.006886	Ndrg4/Sgk1/Shank3	3
Molecular_layer	CD_vs_HC	CD up	GO:0035249	synaptic transmission, glutamatergic	3/23	129/28891	0.0001443	0.01175	0.006886	Cacng7/Glul/Shank3	3
Molecular_layer	CD_vs_HC	CD up	GO:0009636	response to toxic substance	3/23	136/28891	0.0001686	0.01175	0.006886	Mbp/Mt1/Mt2	3
Molecular_layer	CD_vs_HC	CD up	GO:2000311	regulation of AMPA receptor activity	2/23	26/28891	0.0001947	0.01175	0.006886	Cacng7/Shank3	2
Molecular_layer	CD_vs_HC	CD up	GO:0006883	intracellular sodium ion homeostasis	2/23	27/28891	0.0002102	0.01175	0.006886	Sgk1/Spp1	2
Molecular_layer	CD_vs_HC	CD up	GO:0006882	intracellular zinc ion homeostasis	2/23	28/28891	0.0002263	0.01175	0.006886	Mt1/Mt2	2
Molecular_layer	CD_vs_HC	CD up	GO:0071276	cellular response to cadmium ion	2/23	28/28891	0.0002263	0.01175	0.006886	Mt1/Mt2	2
Molecular_layer	CD_vs_HC	CD up	GO:0046688	response to copper ion	2/23	29/28891	0.0002429	0.01175	0.006886	Mt1/Mt2	2
Molecular_layer	CD_vs_HC	CD up	GO:0007263	nitric oxide mediated signal transduction	2/23	32/28891	0.0002964	0.01338	0.00784	Mt1/Mt2	2
Molecular_layer	CD_vs_HC	CD up	GO:0031667	response to nutrient levels	4/23	427/28891	0.0003334	0.01366	0.00801	Glul/Hspa5/Slc2a1/Spp1	4
Molecular_layer	CD_vs_HC	CD up	GO:0009267	cellular response to starvation	3/23	184/28891	0.0004097	0.01366	0.00801	Glul/Hspa5/Slc2a1	3
Molecular_layer	CD_vs_HC	CD up	GO:0010043	response to zinc ion	2/23	38/28891	0.0004188	0.01366	0.00801	Mt1/Mt2	2
Molecular_layer	CD_vs_HC	CD up	GO:0042908	xenobiotic transport	2/23	39/28891	0.0004412	0.01366	0.00801	Slc15a2/Slc2a1	2
Molecular_layer	CD_vs_HC	CD up	GO:0009991	response to extracellular stimulus	4/23	460/28891	0.0004418	0.01366	0.00801	Glul/Hspa5/Slc2a1/Spp1	4
Molecular_layer	CD_vs_HC	CD up	GO:0007612	learning	3/23	192/28891	0.0004639	0.01366	0.00801	Ndrg4/Sgk1/Shank3	3
Molecular_layer	CD_vs_HC	CD up	GO:0048813	dendrite morphogenesis	3/23	192/28891	0.0004639	0.01366	0.00801	Lzts3/Sgk1/Shank3	3
Molecular_layer	CD_vs_HC	CD up	GO:0046686	response to cadmium ion	2/23	40/28891	0.0004642	0.01366	0.00801	Mt1/Mt2	2
Molecular_layer	CD_vs_HC	CD up	GO:0055078	sodium ion homeostasis	2/23	42/28891	0.000512	0.01444	0.008465	Sgk1/Spp1	2
Molecular_layer	CD_vs_HC	CD up	GO:0042594	response to starvation	3/23	209/28891	0.0005939	0.01608	0.009428	Glul/Hspa5/Slc2a1	3
Molecular_layer	CD_vs_HC	CD up	GO:0007215	glutamate receptor signaling pathway	2/23	49/28891	0.0006969	0.01756	0.01029	Plp1/Shank3	2
Molecular_layer	CD_vs_HC	CD up	GO:0099068	postsynapse assembly	2/23	50/28891	0.0007256	0.01756	0.01029	Lzts3/Shank3	2
Molecular_layer	CD_vs_HC	CD up	GO:1901654	response to ketone	3/23	224/28891	0.0007262	0.01756	0.01029	Mbp/Sgk1/Spp1	3
Molecular_layer	CD_vs_HC	CD up	GO:0031669	cellular response to nutrient levels	3/23	239/28891	0.000876	0.02045	0.01199	Glul/Hspa5/Slc2a1	3
Molecular_layer	CD_vs_HC	CD up	GO:0061001	regulation of dendritic spine morphogenesis	2/23	59/28891	0.001009	0.02207	0.01294	Lzts3/Shank3	2
Molecular_layer	CD_vs_HC	CD up	GO:0048545	response to steroid hormone	3/23	253/28891	0.001032	0.02207	0.01294	Mbp/Sgk1/Spp1	3
Molecular_layer	CD_vs_HC	CD up	GO:0042149	cellular response to glucose starvation	2/23	60/28891	0.001043	0.02207	0.01294	Hspa5/Slc2a1	2
Molecular_layer	CD_vs_HC	CD up	GO:0031668	cellular response to extracellular stimulus	3/23	271/28891	0.001258	0.02451	0.01437	Glul/Hspa5/Slc2a1	3
Molecular_layer	CD_vs_HC	CD up	GO:0061077	chaperone-mediated protein folding	2/23	66/28891	0.001261	0.02451	0.01437	Fkbp5/Hspa5	2
Molecular_layer	CD_vs_HC	CD up	GO:0099601	regulation of neurotransmitter receptor activity	2/23	68/28891	0.001338	0.02451	0.01437	Cacng7/Shank3	2
Molecular_layer	CD_vs_HC	CD up	GO:0022604	regulation of cell morphogenesis	3/23	277/28891	0.00134	0.02451	0.01437	Cacng7/Sgk1/Sparc	3
Molecular_layer	CD_vs_HC	CD up	GO:0043270	positive regulation of monoatomic ion transport	3/23	277/28891	0.00134	0.02451	0.01437	Plp1/Sgk1/Shank3	3
Molecular_layer	CD_vs_HC	CD up	GO:0098754	detoxification	2/23	71/28891	0.001457	0.02596	0.01522	Mt1/Mt2	2
Molecular_layer	CD_vs_HC	CD up	GO:0008542	visual learning	2/23	75/28891	0.001624	0.02819	0.01652	Ndrg4/Sgk1	2
Molecular_layer	CD_vs_HC	CD up	GO:0060997	dendritic spine morphogenesis	2/23	76/28891	0.001667	0.02821	0.01654	Lzts3/Shank3	2
Molecular_layer	CD_vs_HC	CD up	GO:0050807	regulation of synapse organization	3/23	309/28891	0.001831	0.03023	0.01772	Lzts3/Shank3/Sparc	3
Molecular_layer	CD_vs_HC	CD up	GO:0007632	visual behavior	2/23	81/28891	0.001891	0.03047	0.01786	Ndrg4/Sgk1	2
Molecular_layer	CD_vs_HC	CD up	GO:0050803	regulation of synapse structure or activity	3/23	317/28891	0.001969	0.031	0.01817	Lzts3/Shank3/Sparc	3
Molecular_layer	CD_vs_HC	CD up	GO:0016358	dendrite development	3/23	327/28891	0.002151	0.0331	0.0194	Lzts3/Sgk1/Shank3	3
Molecular_layer	CD_vs_HC	CD up	GO:0007611	learning or memory	3/23	331/28891	0.002226	0.0335	0.01963	Ndrg4/Sgk1/Shank3	3
Molecular_layer	CD_vs_HC	CD up	GO:0071496	cellular response to external stimulus	3/23	335/28891	0.002304	0.0339	0.01987	Glul/Hspa5/Slc2a1	3
Molecular_layer	CD_vs_HC	CD up	GO:0050806	positive regulation of synaptic transmission	3/23	348/28891	0.002566	0.03696	0.02167	Cacng7/Glul/Shank3	3
Molecular_layer	CD_vs_HC	CD up	GO:0050890	cognition	3/23	371/28891	0.003074	0.04335	0.02541	Ndrg4/Sgk1/Shank3	3
Molecular_layer	CD_vs_HC	CD up	GO:0097061	dendritic spine organization	2/23	108/28891	0.003328	0.04598	0.02695	Lzts3/Shank3	2
Molecular_layer	CD_vs_HC	CD down	GO:0002181	cytoplasmic translation	28/85	148/28891	8.807e-44	1.022e-40	8.093e-41	Fau/Rpl11/Rpl13/Rpl14/Rpl17/Rpl18/Rpl21/Rpl22l1/Rpl23/Rpl27a/Rpl29/Rpl30/Rpl34/Rpl35a/Rpl38/Rpl41/Rpl9/Rps10/Rps12/Rps15a/Rps2/Rps20/Rps21/Rps23/Rps24/Rps27a/Rps7/Rps8	28
Molecular_layer	CD_vs_HC	CD down	GO:0140236	translation at presynapse	18/85	47/28891	1.692e-34	7.835e-32	6.207e-32	Rpl10/Rpl13/Rpl14/Rpl17/Rpl23/Rpl27a/Rpl29/Rpl34/Rpl35/Rpl35a/Rpl37/Rpl38/Rpl9/Rps10/Rps12/Rps15a/Rps24/Rps27a	18
Molecular_layer	CD_vs_HC	CD down	GO:0140241	translation at synapse	18/85	48/28891	2.702e-34	7.835e-32	6.207e-32	Rpl10/Rpl13/Rpl14/Rpl17/Rpl23/Rpl27a/Rpl29/Rpl34/Rpl35/Rpl35a/Rpl37/Rpl38/Rpl9/Rps10/Rps12/Rps15a/Rps24/Rps27a	18
Molecular_layer	CD_vs_HC	CD down	GO:0140242	translation at postsynapse	18/85	48/28891	2.702e-34	7.835e-32	6.207e-32	Rpl10/Rpl13/Rpl14/Rpl17/Rpl23/Rpl27a/Rpl29/Rpl34/Rpl35/Rpl35a/Rpl37/Rpl38/Rpl9/Rps10/Rps12/Rps15a/Rps24/Rps27a	18
Molecular_layer	CD_vs_HC	CD down	GO:0042254	ribosome biogenesis	14/85	322/28891	6.421e-13	1.49e-10	1.18e-10	Fau/Rpl10/Rpl11/Rpl14/Rpl35/Rpl35a/Rpl38/Rps12/Rps15a/Rps21/Rps23/Rps24/Rps7/Rps8	14
Molecular_layer	CD_vs_HC	CD down	GO:0042274	ribosomal small subunit biogenesis	9/85	104/28891	2.34e-11	4.523e-09	3.583e-09	Fau/Rpl38/Rps12/Rps15a/Rps21/Rps23/Rps24/Rps7/Rps8	9
Molecular_layer	CD_vs_HC	CD down	GO:0022613	ribonucleoprotein complex biogenesis	14/85	440/28891	4.178e-11	6.924e-09	5.485e-09	Fau/Rpl10/Rpl11/Rpl14/Rpl35/Rpl35a/Rpl38/Rps12/Rps15a/Rps21/Rps23/Rps24/Rps7/Rps8	14
Molecular_layer	CD_vs_HC	CD down	GO:0006119	oxidative phosphorylation	9/85	147/28891	5.291e-10	7.259e-08	5.751e-08	Chchd10/Cox7a2/Cox8a/Ndufa13/Ndufb8/Ndufb9/Uqcc2/Uqcrb/Uqcrh	9
Molecular_layer	CD_vs_HC	CD down	GO:1901798	positive regulation of signal transduction by p53 class mediator	6/85	33/28891	5.632e-10	7.259e-08	5.751e-08	Rpl11/Rpl23/Rpl37/Rps20/Rps7/Ubb	6
Molecular_layer	CD_vs_HC	CD down	GO:0009060	aerobic respiration	9/85	196/28891	6.683e-09	7.752e-07	6.141e-07	Chchd10/Cox7a2/Cox8a/Ndufa13/Ndufb8/Ndufb9/Uqcc2/Uqcrb/Uqcrh	9
Molecular_layer	CD_vs_HC	CD down	GO:0006091	generation of precursor metabolites and energy	12/85	484/28891	1.856e-08	1.957e-06	1.551e-06	Chchd10/Cox7a2/Cox8a/Eno1/Gapdh/Ndufa13/Ndufa4/Ndufb8/Ndufb9/Uqcc2/Uqcrb/Uqcrh	12
Molecular_layer	CD_vs_HC	CD down	GO:0019646	aerobic electron transport chain	6/85	64/28891	3.545e-08	3.427e-06	2.715e-06	Cox7a2/Cox8a/Ndufb8/Ndufb9/Uqcrb/Uqcrh	6
Molecular_layer	CD_vs_HC	CD down	GO:0045333	cellular respiration	9/85	254/28891	6.267e-08	5.592e-06	4.43e-06	Chchd10/Cox7a2/Cox8a/Ndufa13/Ndufb8/Ndufb9/Uqcc2/Uqcrb/Uqcrh	9
Molecular_layer	CD_vs_HC	CD down	GO:0042273	ribosomal large subunit biogenesis	6/85	76/28891	1.005e-07	8.328e-06	6.597e-06	Rpl10/Rpl11/Rpl14/Rpl35/Rpl35a/Rpl38	6
Molecular_layer	CD_vs_HC	CD down	GO:0042775	mitochondrial ATP synthesis coupled electron transport	6/85	80/28891	1.369e-07	1.058e-05	8.385e-06	Cox7a2/Cox8a/Ndufb8/Ndufb9/Uqcrb/Uqcrh	6
Molecular_layer	CD_vs_HC	CD down	GO:0042773	ATP synthesis coupled electron transport	6/85	82/28891	1.587e-07	1.151e-05	9.117e-06	Cox7a2/Cox8a/Ndufb8/Ndufb9/Uqcrb/Uqcrh	6
Molecular_layer	CD_vs_HC	CD down	GO:1901796	regulation of signal transduction by p53 class mediator	6/85	85/28891	1.969e-07	1.343e-05	1.064e-05	Rpl11/Rpl23/Rpl37/Rps20/Rps7/Ubb	6
Molecular_layer	CD_vs_HC	CD down	GO:0006364	rRNA processing	8/85	215/28891	2.43e-07	1.566e-05	1.241e-05	Rpl11/Rpl14/Rpl35/Rpl35a/Rps21/Rps24/Rps7/Rps8	8
Molecular_layer	CD_vs_HC	CD down	GO:0022904	respiratory electron transport chain	6/85	106/28891	7.31e-07	4.463e-05	3.536e-05	Cox7a2/Cox8a/Ndufb8/Ndufb9/Uqcrb/Uqcrh	6
Molecular_layer	CD_vs_HC	CD down	GO:0016072	rRNA metabolic process	8/85	252/28891	8.086e-07	4.69e-05	3.715e-05	Rpl11/Rpl14/Rpl35/Rpl35a/Rps21/Rps24/Rps7/Rps8	8
Molecular_layer	CD_vs_HC	CD down	GO:0015980	energy derivation by oxidation of organic compounds	9/85	350/28891	9.297e-07	5.136e-05	4.068e-05	Chchd10/Cox7a2/Cox8a/Ndufa13/Ndufb8/Ndufb9/Uqcc2/Uqcrb/Uqcrh	9
Molecular_layer	CD_vs_HC	CD down	GO:0022900	electron transport chain	6/85	116/28891	1.242e-06	6.549e-05	5.188e-05	Cox7a2/Cox8a/Ndufb8/Ndufb9/Uqcrb/Uqcrh	6
Molecular_layer	CD_vs_HC	CD down	GO:1902255	positive regulation of intrinsic apoptotic signaling pathway by p53 class mediator	3/85	10/28891	2.906e-06	0.0001404	0.0001113	Rpl11/Rps7/Ubb	3
Molecular_layer	CD_vs_HC	CD down	GO:1904667	negative regulation of ubiquitin protein ligase activity	3/85	10/28891	2.906e-06	0.0001404	0.0001113	Rpl11/Rpl23/Rps7	3
Molecular_layer	CD_vs_HC	CD down	GO:0072331	signal transduction by p53 class mediator	6/85	153/28891	6.193e-06	0.0002874	0.0002276	Rpl11/Rpl23/Rpl37/Rps20/Rps7/Ubb	6
Molecular_layer	CD_vs_HC	CD down	GO:0051438	regulation of ubiquitin-protein transferase activity	4/85	44/28891	8.658e-06	0.0003863	0.000306	Rpl11/Rpl23/Rps2/Rps7	4
Molecular_layer	CD_vs_HC	CD down	GO:0051444	negative regulation of ubiquitin-protein transferase activity	3/85	18/28891	1.942e-05	0.0008345	0.0006611	Rpl11/Rpl23/Rps7	3
Molecular_layer	CD_vs_HC	CD down	GO:2001242	regulation of intrinsic apoptotic signaling pathway	6/85	194/28891	2.389e-05	0.0009895	0.0007839	Eno1/Ndufa13/Ppia/Rpl11/Rps7/Ubb	6
Molecular_layer	CD_vs_HC	CD down	GO:0034470	ncRNA processing	8/85	413/28891	3.002e-05	0.001201	0.0009513	Rpl11/Rpl14/Rpl35/Rpl35a/Rps21/Rps24/Rps7/Rps8	8
Molecular_layer	CD_vs_HC	CD down	GO:0031396	regulation of protein ubiquitination	6/85	213/28891	4.031e-05	0.001558	0.001235	Ppia/Rpl11/Rpl23/Rps2/Rps7/Ubb	6
Molecular_layer	CD_vs_HC	CD down	GO:1904666	regulation of ubiquitin protein ligase activity	3/85	23/28891	4.171e-05	0.001561	0.001236	Rpl11/Rpl23/Rps7	3
Molecular_layer	CD_vs_HC	CD down	GO:0042255	ribosome assembly	4/85	66/28891	4.376e-05	0.001586	0.001257	Fau/Rpl10/Rpl11/Rpl38	4
Molecular_layer	CD_vs_HC	CD down	GO:0000027	ribosomal large subunit assembly	3/85	26/28891	6.085e-05	0.002139	0.001694	Rpl10/Rpl11/Rpl38	3
Molecular_layer	CD_vs_HC	CD down	GO:0034341	response to type II interferon	5/85	150/28891	8.286e-05	0.002827	0.002239	Cdc42ep4/Dapk3/Gapdh/Ifitm3/Vim	5
Molecular_layer	CD_vs_HC	CD down	GO:1903320	regulation of protein modification by small protein conjugation or removal	6/85	249/28891	9.556e-05	0.003147	0.002493	Ppia/Rpl11/Rpl23/Rps2/Rps7/Ubb	6
Molecular_layer	CD_vs_HC	CD down	GO:0031397	negative regulation of protein ubiquitination	4/85	81/28891	9.768e-05	0.003147	0.002493	Ppia/Rpl11/Rpl23/Rps7	4
Molecular_layer	CD_vs_HC	CD down	GO:1903321	negative regulation of protein modification by small protein conjugation or removal	4/85	92/28891	0.0001601	0.004994	0.003956	Ppia/Rpl11/Rpl23/Rps7	4
Molecular_layer	CD_vs_HC	CD down	GO:1902253	regulation of intrinsic apoptotic signaling pathway by p53 class mediator	3/85	36/28891	0.0001636	0.004994	0.003956	Rpl11/Rps7/Ubb	3
Molecular_layer	CD_vs_HC	CD down	GO:1901874	negative regulation of post-translational protein modification	4/85	98/28891	0.0002042	0.006073	0.004811	Ppia/Rpl11/Rpl23/Rps7	4
Molecular_layer	CD_vs_HC	CD down	GO:0006754	ATP biosynthetic process	4/85	101/28891	0.0002292	0.006648	0.005267	Eno1/Ndufa13/Ndufb8/Ndufb9	4
Molecular_layer	CD_vs_HC	CD down	GO:1901873	regulation of post-translational protein modification	6/85	295/28891	0.0002396	0.00678	0.005371	Ppia/Rpl11/Rpl23/Rps2/Rps7/Ubb	6
Molecular_layer	CD_vs_HC	CD down	GO:0033108	mitochondrial respiratory chain complex assembly	4/85	104/28891	0.0002564	0.007083	0.005611	Ndufa13/Ndufb8/Ndufb9/Uqcc2	4
Molecular_layer	CD_vs_HC	CD down	GO:2001233	regulation of apoptotic signaling pathway	7/85	437/28891	0.0003089	0.008334	0.006602	Dapk3/Eno1/Ndufa13/Ppia/Rpl11/Rps7/Ubb	7
Molecular_layer	CD_vs_HC	CD down	GO:0050821	protein stabilization	5/85	202/28891	0.0003314	0.008738	0.006922	Gapdh/Plpp3/Rpl11/Rpl23/Rps7	5
Molecular_layer	CD_vs_HC	CD down	GO:0031647	regulation of protein stability	6/85	316/28891	0.0003459	0.008876	0.007031	Gapdh/Plpp3/Rpl11/Rpl23/Rps7/Serf2	6
Molecular_layer	CD_vs_HC	CD down	GO:0009206	purine ribonucleoside triphosphate biosynthetic process	4/85	113/28891	0.000352	0.008876	0.007031	Eno1/Ndufa13/Ndufb8/Ndufb9	4
Molecular_layer	CD_vs_HC	CD down	GO:0009145	purine nucleoside triphosphate biosynthetic process	4/85	114/28891	0.000364	0.008983	0.007116	Eno1/Ndufa13/Ndufb8/Ndufb9	4
Molecular_layer	CD_vs_HC	CD down	GO:0097193	intrinsic apoptotic signaling pathway	6/85	327/28891	0.0004146	0.009821	0.00778	Eno1/Ndufa13/Ppia/Rpl11/Rps7/Ubb	6
Molecular_layer	CD_vs_HC	CD down	GO:0009201	ribonucleoside triphosphate biosynthetic process	4/85	118/28891	0.0004148	0.009821	0.00778	Eno1/Ndufa13/Ndufb8/Ndufb9	4
Molecular_layer	CD_vs_HC	CD down	GO:0071346	cellular response to type II interferon	4/85	122/28891	0.0004706	0.01092	0.008649	Cdc42ep4/Dapk3/Gapdh/Vim	4
Molecular_layer	CD_vs_HC	CD down	GO:0009142	nucleoside triphosphate biosynthetic process	4/85	124/28891	0.0005004	0.01138	0.009017	Eno1/Ndufa13/Ndufb8/Ndufb9	4
Molecular_layer	CD_vs_HC	CD down	GO:0046166	glyceraldehyde-3-phosphate biosynthetic process	2/85	12/28891	0.0005539	0.01212	0.009603	Eno1/Gapdh	2
Molecular_layer	CD_vs_HC	CD down	GO:0060020	Bergmann glial cell differentiation	2/85	12/28891	0.0005539	0.01212	0.009603	Plpp3/Vim	2
Molecular_layer	CD_vs_HC	CD down	GO:2000059	negative regulation of ubiquitin-dependent protein catabolic process	3/85	57/28891	0.0006412	0.01377	0.01091	Rpl11/Rpl23/Rps7	3
Molecular_layer	CD_vs_HC	CD down	GO:0006122	mitochondrial electron transport, ubiquinol to cytochrome c	2/85	13/28891	0.0006533	0.01378	0.01092	Uqcrb/Uqcrh	2
Molecular_layer	CD_vs_HC	CD down	GO:0046034	ATP metabolic process	4/85	135/28891	0.0006888	0.01427	0.0113	Eno1/Ndufa13/Ndufb8/Ndufb9	4
Molecular_layer	CD_vs_HC	CD down	GO:0045861	negative regulation of proteolysis	6/85	362/28891	0.0007066	0.01438	0.01139	Gapdh/Lxn/Pcsk1n/Rpl11/Rpl23/Rps7	6
Molecular_layer	CD_vs_HC	CD down	GO:0036376	sodium ion export across plasma membrane	2/85	15/28891	0.0008761	0.01752	0.01388	Atp1a1/Fxyd1	2
Molecular_layer	CD_vs_HC	CD down	GO:0010257	NADH dehydrogenase complex assembly	3/85	65/28891	0.0009411	0.0179	0.01418	Ndufa13/Ndufb8/Ndufb9	3
Molecular_layer	CD_vs_HC	CD down	GO:0032981	mitochondrial respiratory chain complex I assembly	3/85	65/28891	0.0009411	0.0179	0.01418	Ndufa13/Ndufb8/Ndufb9	3
Molecular_layer	CD_vs_HC	CD down	GO:0042776	proton motive force-driven mitochondrial ATP synthesis	3/85	65/28891	0.0009411	0.0179	0.01418	Ndufa13/Ndufb8/Ndufb9	3
Molecular_layer	CD_vs_HC	CD down	GO:0019682	glyceraldehyde-3-phosphate metabolic process	2/85	16/28891	0.0009994	0.0187	0.01481	Eno1/Gapdh	2
Molecular_layer	CD_vs_HC	CD down	GO:0006735	NADH regeneration	2/85	17/28891	0.00113	0.01999	0.01584	Eno1/Gapdh	2
Molecular_layer	CD_vs_HC	CD down	GO:0061621	canonical glycolysis	2/85	17/28891	0.00113	0.01999	0.01584	Eno1/Gapdh	2
Molecular_layer	CD_vs_HC	CD down	GO:0061718	glucose catabolic process to pyruvate	2/85	17/28891	0.00113	0.01999	0.01584	Eno1/Gapdh	2
Molecular_layer	CD_vs_HC	CD down	GO:0042063	gliogenesis	6/85	397/28891	0.001137	0.01999	0.01584	Dbi/Enpp2/Metrn/Plpp3/Tuba1a/Vim	6
Molecular_layer	CD_vs_HC	CD down	GO:0015986	proton motive force-driven ATP synthesis	3/85	70/28891	0.001167	0.0202	0.01601	Ndufa13/Ndufb8/Ndufb9	3
Molecular_layer	CD_vs_HC	CD down	GO:1903051	negative regulation of proteolysis involved in protein catabolic process	3/85	72/28891	0.001266	0.0216	0.01711	Rpl11/Rpl23/Rps7	3
Molecular_layer	CD_vs_HC	CD down	GO:0009205	purine ribonucleoside triphosphate metabolic process	4/85	160/28891	0.001295	0.02176	0.01724	Eno1/Ndufa13/Ndufb8/Ndufb9	4
Molecular_layer	CD_vs_HC	CD down	GO:2001244	positive regulation of intrinsic apoptotic signaling pathway	3/85	73/28891	0.001318	0.02183	0.0173	Rpl11/Rps7/Ubb	3
Molecular_layer	CD_vs_HC	CD down	GO:0006123	mitochondrial electron transport, cytochrome c to oxygen	2/85	19/28891	0.001416	0.02313	0.01833	Cox7a2/Cox8a	2
Molecular_layer	CD_vs_HC	CD down	GO:0006417	regulation of translation	6/85	418/28891	0.001479	0.02382	0.01887	Dapk3/Gapdh/Rpl10/Rpl38/Uqcc2/Vim	6
Molecular_layer	CD_vs_HC	CD down	GO:0009199	ribonucleoside triphosphate metabolic process	4/85	167/28891	0.001515	0.02408	0.01907	Eno1/Ndufa13/Ndufb8/Ndufb9	4
Molecular_layer	CD_vs_HC	CD down	GO:0061620	glycolytic process through glucose-6-phosphate	2/85	20/28891	0.00157	0.02448	0.01939	Eno1/Gapdh	2
Molecular_layer	CD_vs_HC	CD down	GO:0009144	purine nucleoside triphosphate metabolic process	4/85	169/28891	0.001583	0.02448	0.01939	Eno1/Ndufa13/Ndufb8/Ndufb9	4
Molecular_layer	CD_vs_HC	CD down	GO:0010001	glial cell differentiation	5/85	292/28891	0.001729	0.0261	0.02067	Enpp2/Metrn/Plpp3/Tuba1a/Vim	5
Molecular_layer	CD_vs_HC	CD down	GO:0000028	ribosomal small subunit assembly	2/85	21/28891	0.001732	0.0261	0.02067	Fau/Rpl38	2
Molecular_layer	CD_vs_HC	CD down	GO:0022618	protein-RNA complex assembly	4/85	175/28891	0.001798	0.02674	0.02118	Fau/Rpl10/Rpl11/Rpl38	4
Molecular_layer	CD_vs_HC	CD down	GO:2001235	positive regulation of apoptotic signaling pathway	4/85	177/28891	0.001874	0.02752	0.0218	Dapk3/Rpl11/Rps7/Ubb	4
Molecular_layer	CD_vs_HC	CD down	GO:0072332	intrinsic apoptotic signaling pathway by p53 class mediator	3/85	86/28891	0.002109	0.03029	0.024	Rpl11/Rps7/Ubb	3
Molecular_layer	CD_vs_HC	CD down	GO:0071826	protein-RNA complex organization	4/85	183/28891	0.002115	0.03029	0.024	Fau/Rpl10/Rpl11/Rpl38	4
Molecular_layer	CD_vs_HC	CD down	GO:0009141	nucleoside triphosphate metabolic process	4/85	184/28891	0.002158	0.03052	0.02418	Eno1/Ndufa13/Ndufb8/Ndufb9	4
Molecular_layer	CD_vs_HC	CD down	GO:0006007	glucose catabolic process	2/85	26/28891	0.002655	0.03667	0.02905	Eno1/Gapdh	2
Molecular_layer	CD_vs_HC	CD down	GO:0061615	glycolytic process through fructose-6-phosphate	2/85	26/28891	0.002655	0.03667	0.02905	Eno1/Gapdh	2
Molecular_layer	CD_vs_HC	CD down	GO:0031400	negative regulation of protein modification process	6/85	473/28891	0.002744	0.03745	0.02967	Dbi/Plpp3/Ppia/Rpl11/Rpl23/Rps7	6
Molecular_layer	CD_vs_HC	CD down	GO:0009152	purine ribonucleotide biosynthetic process	4/85	198/28891	0.002811	0.03792	0.03004	Eno1/Ndufa13/Ndufb8/Ndufb9	4
Molecular_layer	CD_vs_HC	CD down	GO:0002082	regulation of oxidative phosphorylation	2/85	27/28891	0.002862	0.03817	0.03023	Cox7a2/Uqcc2	2
Molecular_layer	CD_vs_HC	CD down	GO:0034248	regulation of amide metabolic process	6/85	482/28891	0.003011	0.03969	0.03144	Dapk3/Gapdh/Rpl10/Rpl38/Uqcc2/Vim	6
Molecular_layer	CD_vs_HC	CD down	GO:0046184	aldehyde biosynthetic process	2/85	28/28891	0.003077	0.0401	0.03177	Eno1/Gapdh	2
Molecular_layer	CD_vs_HC	CD down	GO:0006120	mitochondrial electron transport, NADH to ubiquinone	2/85	29/28891	0.003298	0.04251	0.03368	Ndufb8/Ndufb9	2
Molecular_layer	CD_vs_HC	CD down	GO:0009260	ribonucleotide biosynthetic process	4/85	210/28891	0.00347	0.04423	0.03504	Eno1/Ndufa13/Ndufb8/Ndufb9	4
Molecular_layer	CD_vs_HC	CD down	GO:0046390	ribose phosphate biosynthetic process	4/85	218/28891	0.003963	0.04997	0.03959	Eno1/Ndufa13/Ndufb8/Ndufb9	4
Purkinje_layer	CD_vs_HC	CD up	GO:0097501	stress response to metal ion	2/8	13/28891	5.225e-06	0.0006043	0.0002722	Mt1/Mt2	2
Purkinje_layer	CD_vs_HC	CD up	GO:0061687	detoxification of inorganic compound	2/8	14/28891	6.095e-06	0.0006043	0.0002722	Mt1/Mt2	2
Purkinje_layer	CD_vs_HC	CD up	GO:0071294	cellular response to zinc ion	2/8	16/28891	8.036e-06	0.0006043	0.0002722	Mt1/Mt2	2
Purkinje_layer	CD_vs_HC	CD up	GO:0071280	cellular response to copper ion	2/8	18/28891	1.024e-05	0.0006043	0.0002722	Mt1/Mt2	2
Purkinje_layer	CD_vs_HC	CD up	GO:0006882	intracellular zinc ion homeostasis	2/8	28/28891	2.527e-05	0.0009149	0.0004122	Mt1/Mt2	2
Purkinje_layer	CD_vs_HC	CD up	GO:0071276	cellular response to cadmium ion	2/8	28/28891	2.527e-05	0.0009149	0.0004122	Mt1/Mt2	2
Purkinje_layer	CD_vs_HC	CD up	GO:0046688	response to copper ion	2/8	29/28891	2.714e-05	0.0009149	0.0004122	Mt1/Mt2	2
Purkinje_layer	CD_vs_HC	CD up	GO:0007263	nitric oxide mediated signal transduction	2/8	32/28891	3.314e-05	0.0009776	0.0004404	Mt1/Mt2	2
Purkinje_layer	CD_vs_HC	CD up	GO:0010043	response to zinc ion	2/8	38/28891	4.693e-05	0.001229	0.0005535	Mt1/Mt2	2
Purkinje_layer	CD_vs_HC	CD up	GO:0046686	response to cadmium ion	2/8	40/28891	5.206e-05	0.001229	0.0005535	Mt1/Mt2	2
Purkinje_layer	CD_vs_HC	CD up	GO:0098754	detoxification	2/8	71/28891	0.0001651	0.003543	0.001596	Mt1/Mt2	2
Purkinje_layer	CD_vs_HC	CD up	GO:0009636	response to toxic substance	2/8	136/28891	0.0006046	0.01189	0.005356	Mt1/Mt2	2
Purkinje_layer	CD_vs_HC	CD up	GO:0071248	cellular response to metal ion	2/8	187/28891	0.001137	0.02065	0.009301	Mt1/Mt2	2
Purkinje_layer	CD_vs_HC	CD up	GO:0071241	cellular response to inorganic substance	2/8	258/28891	0.002147	0.03619	0.0163	Mt1/Mt2	2
Purkinje_layer	CD_vs_HC	CD up	GO:0051823	regulation of synapse structural plasticity	1/8	10/28891	0.002766	0.03627	0.01634	Shank3	1
Purkinje_layer	CD_vs_HC	CD up	GO:0098598	learned vocalization behavior or vocal learning	1/8	10/28891	0.002766	0.03627	0.01634	Shank3	1
Purkinje_layer	CD_vs_HC	CD up	GO:0106104	regulation of glutamate receptor clustering	1/8	10/28891	0.002766	0.03627	0.01634	Shank3	1
Purkinje_layer	CD_vs_HC	CD up	GO:1904717	regulation of AMPA glutamate receptor clustering	1/8	10/28891	0.002766	0.03627	0.01634	Shank3	1
Purkinje_layer	CD_vs_HC	CD up	GO:0070424	regulation of nucleotide-binding oligomerization domain containing signaling pathway	1/8	11/28891	0.003042	0.03654	0.01646	Slc15a2	1
Purkinje_layer	CD_vs_HC	CD up	GO:0010038	response to metal ion	2/8	320/28891	0.003277	0.03654	0.01646	Mt1/Mt2	2
Purkinje_layer	CD_vs_HC	CD up	GO:0019932	second-messenger-mediated signaling	2/8	328/28891	0.003439	0.03654	0.01646	Mt1/Mt2	2
Purkinje_layer	CD_vs_HC	CD up	GO:0031223	auditory behavior	1/8	13/28891	0.003595	0.03654	0.01646	Shank3	1
Purkinje_layer	CD_vs_HC	CD up	GO:0097113	AMPA glutamate receptor clustering	1/8	14/28891	0.003871	0.03654	0.01646	Shank3	1
Purkinje_layer	CD_vs_HC	CD up	GO:0097688	glutamate receptor clustering	1/8	14/28891	0.003871	0.03654	0.01646	Shank3	1
Purkinje_layer	CD_vs_HC	CD up	GO:2000822	regulation of behavioral fear response	1/8	14/28891	0.003871	0.03654	0.01646	Shank3	1
Purkinje_layer	CD_vs_HC	CD up	GO:1903365	regulation of fear response	1/8	15/28891	0.004147	0.03764	0.01696	Shank3	1
Purkinje_layer	CD_vs_HC	CD up	GO:0007638	mechanosensory behavior	1/8	16/28891	0.004422	0.03815	0.01718	Shank3	1
Purkinje_layer	CD_vs_HC	CD up	GO:0044725	epigenetic programming in the zygotic pronuclei	1/8	17/28891	0.004698	0.03815	0.01718	Meg3	1
Purkinje_layer	CD_vs_HC	CD up	GO:0021756	striatum development	1/8	18/28891	0.004974	0.03815	0.01718	Shank3	1
Purkinje_layer	CD_vs_HC	CD up	GO:1900452	regulation of long-term synaptic depression	1/8	19/28891	0.00525	0.03815	0.01718	Shank3	1
Purkinje_layer	CD_vs_HC	CD up	GO:0071514	genomic imprinting	1/8	20/28891	0.005525	0.03815	0.01718	Meg3	1
Purkinje_layer	CD_vs_HC	CD up	GO:0035641	locomotory exploration behavior	1/8	21/28891	0.005801	0.03815	0.01718	Shank3	1
Purkinje_layer	CD_vs_HC	CD up	GO:0070423	nucleotide-binding oligomerization domain containing signaling pathway	1/8	22/28891	0.006076	0.03815	0.01718	Slc15a2	1
Purkinje_layer	CD_vs_HC	CD up	GO:0071625	vocalization behavior	1/8	22/28891	0.006076	0.03815	0.01718	Shank3	1
Purkinje_layer	CD_vs_HC	CD up	GO:0072578	neurotransmitter-gated ion channel clustering	1/8	22/28891	0.006076	0.03815	0.01718	Shank3	1
Purkinje_layer	CD_vs_HC	CD up	GO:1903909	regulation of receptor clustering	1/8	22/28891	0.006076	0.03815	0.01718	Shank3	1
Purkinje_layer	CD_vs_HC	CD up	GO:0035872	nucleotide-binding domain, leucine rich repeat containing receptor signaling pathway	1/8	23/28891	0.006352	0.03815	0.01718	Slc15a2	1
Purkinje_layer	CD_vs_HC	CD up	GO:0043045	post-fertilization epigenetic regulation of gene expression	1/8	23/28891	0.006352	0.03815	0.01718	Meg3	1
Purkinje_layer	CD_vs_HC	CD up	GO:0097154	GABAergic neuron differentiation	1/8	23/28891	0.006352	0.03815	0.01718	Shank3	1
Purkinje_layer	CD_vs_HC	CD up	GO:0007625	grooming behavior	1/8	24/28891	0.006627	0.03815	0.01718	Shank3	1
Purkinje_layer	CD_vs_HC	CD up	GO:0021544	subpallium development	1/8	24/28891	0.006627	0.03815	0.01718	Shank3	1
Purkinje_layer	CD_vs_HC	CD up	GO:2000311	regulation of AMPA receptor activity	1/8	26/28891	0.007178	0.03997	0.01801	Shank3	1
Purkinje_layer	CD_vs_HC	CD up	GO:0097107	postsynaptic density assembly	1/8	27/28891	0.007453	0.03997	0.01801	Shank3	1
Purkinje_layer	CD_vs_HC	CD up	GO:0097396	response to interleukin-17	1/8	27/28891	0.007453	0.03997	0.01801	Shank3	1
Purkinje_layer	CD_vs_HC	CD up	GO:0010996	response to auditory stimulus	1/8	29/28891	0.008003	0.04197	0.01891	Shank3	1
Purkinje_layer	CD_vs_HC	CD up	GO:1900273	positive regulation of long-term synaptic potentiation	1/8	32/28891	0.008828	0.04529	0.0204	Shank3	1
Purkinje_layer	CD_vs_HC	CD up	GO:0070293	renal absorption	1/8	34/28891	0.009377	0.04709	0.02121	Slc15a2	1
Purkinje_layer	CD_vs_HC	CD up	GO:0048169	regulation of long-term neuronal synaptic plasticity	1/8	37/28891	0.0102	0.04709	0.02121	Shank3	1
Purkinje_layer	CD_vs_HC	CD up	GO:0098698	postsynaptic specialization assembly	1/8	38/28891	0.01048	0.04709	0.02121	Shank3	1
Purkinje_layer	CD_vs_HC	CD up	GO:1904861	excitatory synapse assembly	1/8	38/28891	0.01048	0.04709	0.02121	Shank3	1
Purkinje_layer	CD_vs_HC	CD up	GO:0006884	cell volume homeostasis	1/8	39/28891	0.01075	0.04709	0.02121	Shank3	1
Purkinje_layer	CD_vs_HC	CD up	GO:0042908	xenobiotic transport	1/8	39/28891	0.01075	0.04709	0.02121	Slc15a2	1
Purkinje_layer	CD_vs_HC	CD up	GO:0060292	long-term synaptic depression	1/8	39/28891	0.01075	0.04709	0.02121	Shank3	1
Purkinje_layer	CD_vs_HC	CD up	GO:0032232	negative regulation of actin filament bundle assembly	1/8	40/28891	0.01102	0.04709	0.02121	Shank3	1
Purkinje_layer	CD_vs_HC	CD up	GO:2000273	positive regulation of signaling receptor activity	1/8	40/28891	0.01102	0.04709	0.02121	Shank3	1
Purkinje_layer	CD_vs_HC	CD up	GO:2000463	positive regulation of excitatory postsynaptic potential	1/8	41/28891	0.0113	0.04709	0.02121	Shank3	1
Purkinje_layer	CD_vs_HC	CD up	GO:0035640	exploration behavior	1/8	42/28891	0.01157	0.04709	0.02121	Shank3	1
Purkinje_layer	CD_vs_HC	CD up	GO:0051968	positive regulation of synaptic transmission, glutamatergic	1/8	42/28891	0.01157	0.04709	0.02121	Shank3	1
Purkinje_layer	CD_vs_HC	CD up	GO:0097106	postsynaptic density organization	1/8	45/28891	0.01239	0.04944	0.02227	Shank3	1
Purkinje_layer	CD_vs_HC	CD up	GO:0048854	brain morphogenesis	1/8	46/28891	0.01267	0.04944	0.02227	Shank3	1
Purkinje_layer	CD_vs_HC	CD up	GO:0000184	nuclear-transcribed mRNA catabolic process, nonsense-mediated decay	1/8	48/28891	0.01322	0.04944	0.02227	Smg1	1
Purkinje_layer	CD_vs_HC	CD up	GO:0001941	postsynaptic membrane organization	1/8	48/28891	0.01322	0.04944	0.02227	Shank3	1
Purkinje_layer	CD_vs_HC	CD up	GO:0007215	glutamate receptor signaling pathway	1/8	49/28891	0.01349	0.04944	0.02227	Shank3	1
Purkinje_layer	CD_vs_HC	CD up	GO:0099068	postsynapse assembly	1/8	50/28891	0.01376	0.04944	0.02227	Shank3	1
Purkinje_layer	CD_vs_HC	CD up	GO:0006305	DNA alkylation	1/8	51/28891	0.01404	0.04944	0.02227	Meg3	1
Purkinje_layer	CD_vs_HC	CD up	GO:0006306	DNA methylation	1/8	51/28891	0.01404	0.04944	0.02227	Meg3	1
Purkinje_layer	CD_vs_HC	CD up	GO:0008340	determination of adult lifespan	1/8	51/28891	0.01404	0.04944	0.02227	Meg3	1
Purkinje_layer	CD_vs_HC	CD down	GO:0060020	Bergmann glial cell differentiation	3/28	12/28891	1.783e-07	0.0002017	0.0001235	Gpr37l1/Plpp3/Vim	3
Purkinje_layer	CD_vs_HC	CD down	GO:0051402	neuron apoptotic process	5/28	369/28891	2.553e-05	0.009749	0.00597	Apoe/Clu/Gapdh/Ubb/Vegfb	5
Purkinje_layer	CD_vs_HC	CD down	GO:0042060	wound healing	5/28	370/28891	2.586e-05	0.009749	0.00597	Actg1/Apoe/Plpp3/Ppia/Vegfb	5
Purkinje_layer	CD_vs_HC	CD down	GO:0042063	gliogenesis	5/28	397/28891	3.619e-05	0.009914	0.006072	Clu/Dbi/Gpr37l1/Plpp3/Vim	5
Purkinje_layer	CD_vs_HC	CD down	GO:1902947	regulation of tau-protein kinase activity	2/28	12/28891	5.942e-05	0.009914	0.006072	Apoe/Clu	2
Purkinje_layer	CD_vs_HC	CD down	GO:1905907	negative regulation of amyloid fibril formation	2/28	12/28891	5.942e-05	0.009914	0.006072	Apoe/Clu	2
Purkinje_layer	CD_vs_HC	CD down	GO:0014009	glial cell proliferation	3/28	79/28891	6.136e-05	0.009914	0.006072	Clu/Dbi/Vim	3
Purkinje_layer	CD_vs_HC	CD down	GO:0017038	protein import	2/28	13/28891	7.018e-05	0.009922	0.006076	Apoe/Clu	2
Purkinje_layer	CD_vs_HC	CD down	GO:2001140	positive regulation of phospholipid transport	2/28	14/28891	8.183e-05	0.01016	0.006221	Apoe/Dbi	2
Purkinje_layer	CD_vs_HC	CD down	GO:2001138	regulation of phospholipid transport	2/28	15/28891	9.437e-05	0.01016	0.006221	Apoe/Dbi	2
Purkinje_layer	CD_vs_HC	CD down	GO:0048708	astrocyte differentiation	3/28	94/28891	0.000103	0.01016	0.006221	Gpr37l1/Plpp3/Vim	3
Purkinje_layer	CD_vs_HC	CD down	GO:1905906	regulation of amyloid fibril formation	2/28	16/28891	0.0001078	0.01016	0.006221	Apoe/Clu	2
Purkinje_layer	CD_vs_HC	CD down	GO:1900221	regulation of amyloid-beta clearance	2/28	18/28891	0.0001373	0.01084	0.006637	Apoe/Clu	2
Purkinje_layer	CD_vs_HC	CD down	GO:0051131	chaperone-mediated protein complex assembly	2/28	19/28891	0.0001533	0.01084	0.006637	Clu/Hopx	2
Purkinje_layer	CD_vs_HC	CD down	GO:0090083	regulation of inclusion body assembly	2/28	19/28891	0.0001533	0.01084	0.006637	Apoe/Clu	2
Purkinje_layer	CD_vs_HC	CD down	GO:1902430	negative regulation of amyloid-beta formation	2/28	19/28891	0.0001533	0.01084	0.006637	Apoe/Clu	2
Purkinje_layer	CD_vs_HC	CD down	GO:1902004	positive regulation of amyloid-beta formation	2/28	20/28891	0.0001702	0.01086	0.006651	Apoe/Clu	2
Purkinje_layer	CD_vs_HC	CD down	GO:0010001	glial cell differentiation	4/28	292/28891	0.0001728	0.01086	0.006651	Clu/Gpr37l1/Plpp3/Vim	4
Purkinje_layer	CD_vs_HC	CD down	GO:1902992	negative regulation of amyloid precursor protein catabolic process	2/28	22/28891	0.0002067	0.012	0.007348	Apoe/Clu	2
Purkinje_layer	CD_vs_HC	CD down	GO:0043523	regulation of neuron apoptotic process	4/28	310/28891	0.0002172	0.012	0.007348	Apoe/Clu/Ubb/Vegfb	4
Purkinje_layer	CD_vs_HC	CD down	GO:0071346	cellular response to type II interferon	3/28	122/28891	0.0002228	0.012	0.007348	Actg1/Gapdh/Vim	3
Purkinje_layer	CD_vs_HC	CD down	GO:0006706	steroid catabolic process	2/28	24/28891	0.0002467	0.01237	0.007577	Apoe/Ywhah	2
Purkinje_layer	CD_vs_HC	CD down	GO:0061041	regulation of wound healing	3/28	128/28891	0.0002566	0.01237	0.007577	Actg1/Apoe/Vegfb	3
Purkinje_layer	CD_vs_HC	CD down	GO:0097009	energy homeostasis	3/28	129/28891	0.0002625	0.01237	0.007577	Apoe/Pcsk1n/Ubb	3
Purkinje_layer	CD_vs_HC	CD down	GO:1902993	positive regulation of amyloid precursor protein catabolic process	2/28	26/28891	0.0002902	0.01313	0.008039	Apoe/Clu	2
Purkinje_layer	CD_vs_HC	CD down	GO:0070841	inclusion body assembly	2/28	27/28891	0.0003132	0.01362	0.008343	Apoe/Clu	2
Purkinje_layer	CD_vs_HC	CD down	GO:1990000	amyloid fibril formation	2/28	30/28891	0.0003874	0.01623	0.009939	Apoe/Clu	2
Purkinje_layer	CD_vs_HC	CD down	GO:0034341	response to type II interferon	3/28	150/28891	0.0004085	0.0165	0.01011	Actg1/Gapdh/Vim	3
Purkinje_layer	CD_vs_HC	CD down	GO:0007263	nitric oxide mediated signal transduction	2/28	32/28891	0.0004412	0.01721	0.01054	Apoe/Gapdh	2
Purkinje_layer	CD_vs_HC	CD down	GO:1902903	regulation of supramolecular fiber organization	4/28	393/28891	0.0005332	0.0201	0.01231	Actg1/Apoe/Cdc42ep1/Clu	4
Purkinje_layer	CD_vs_HC	CD down	GO:0097242	amyloid-beta clearance	2/28	37/28891	0.0005907	0.02116	0.01296	Apoe/Clu	2
Purkinje_layer	CD_vs_HC	CD down	GO:0034250	positive regulation of amide metabolic process	3/28	171/28891	0.0005986	0.02116	0.01296	Apoe/Clu/Vim	3
Purkinje_layer	CD_vs_HC	CD down	GO:1903034	regulation of response to wounding	3/28	174/28891	0.0006296	0.02158	0.01321	Actg1/Apoe/Vegfb	3
Purkinje_layer	CD_vs_HC	CD down	GO:1902003	regulation of amyloid-beta formation	2/28	39/28891	0.0006564	0.02184	0.01337	Apoe/Clu	2
Purkinje_layer	CD_vs_HC	CD down	GO:0045834	positive regulation of lipid metabolic process	3/28	185/28891	0.0007521	0.0243	0.01488	Apoe/Dbi/Eef1a2	3
Purkinje_layer	CD_vs_HC	CD down	GO:0051090	regulation of DNA-binding transcription factor activity	4/28	436/28891	0.0007861	0.0247	0.01512	Clu/Jund/Plpp3/Ppia	4
Purkinje_layer	CD_vs_HC	CD down	GO:0002021	response to dietary excess	2/28	44/28891	0.0008355	0.0254	0.01556	Apoe/Pcsk1n	2
Purkinje_layer	CD_vs_HC	CD down	GO:2001242	regulation of intrinsic apoptotic signaling pathway	3/28	194/28891	0.000863	0.0254	0.01556	Clu/Ppia/Ubb	3
Purkinje_layer	CD_vs_HC	CD down	GO:0061136	regulation of proteasomal protein catabolic process	3/28	195/28891	0.0008759	0.0254	0.01556	Apoe/Clu/Ubb	3
Purkinje_layer	CD_vs_HC	CD down	GO:1902991	regulation of amyloid precursor protein catabolic process	2/28	46/28891	0.0009131	0.02582	0.01581	Apoe/Clu	2
Purkinje_layer	CD_vs_HC	CD down	GO:0050821	protein stabilization	3/28	202/28891	0.0009697	0.02675	0.01638	Clu/Gapdh/Plpp3	3
Purkinje_layer	CD_vs_HC	CD down	GO:0034205	amyloid-beta formation	2/28	49/28891	0.001036	0.02788	0.01707	Apoe/Clu	2
Purkinje_layer	CD_vs_HC	CD down	GO:0031400	negative regulation of protein modification process	4/28	473/28891	0.001064	0.02788	0.01707	Apoe/Dbi/Plpp3/Ppia	4
Purkinje_layer	CD_vs_HC	CD down	GO:0043524	negative regulation of neuron apoptotic process	3/28	210/28891	0.001085	0.02788	0.01707	Apoe/Clu/Vegfb	3
Purkinje_layer	CD_vs_HC	CD down	GO:0034248	regulation of amide metabolic process	4/28	482/28891	0.00114	0.02866	0.01755	Apoe/Clu/Gapdh/Vim	4
Purkinje_layer	CD_vs_HC	CD down	GO:0050767	regulation of neurogenesis	4/28	494/28891	0.001249	0.03022	0.01851	Apoe/Gpr37l1/Vim/Ywhah	4
Purkinje_layer	CD_vs_HC	CD down	GO:0031345	negative regulation of cell projection organization	3/28	221/28891	0.001256	0.03022	0.01851	Apoe/Vim/Ywhah	3
Purkinje_layer	CD_vs_HC	CD down	GO:0001662	behavioral fear response	2/28	57/28891	0.001399	0.03211	0.01966	Apoe/Dbi	2
Purkinje_layer	CD_vs_HC	CD down	GO:0050435	amyloid-beta metabolic process	2/28	57/28891	0.001399	0.03211	0.01966	Apoe/Clu	2
Purkinje_layer	CD_vs_HC	CD down	GO:1903050	regulation of proteolysis involved in protein catabolic process	3/28	232/28891	0.001444	0.03211	0.01966	Apoe/Clu/Ubb	3
Purkinje_layer	CD_vs_HC	CD down	GO:0002209	behavioral defense response	2/28	58/28891	0.001448	0.03211	0.01966	Apoe/Dbi	2
Purkinje_layer	CD_vs_HC	CD down	GO:0042987	amyloid precursor protein catabolic process	2/28	61/28891	0.0016	0.0348	0.02131	Apoe/Clu	2
[truncated: 3,119 more rows]
