# Supplementary material for: Region- and cell type-specific changes in gene expression in the cerebellum after classical fear conditioning
Source: Research Square preprint supplement (doi:10.21203/rs.3.rs-6469280/v1), 2025-05-07
Supplement: Supplementary file 9 [file 88d8ef745a8cb8308a8a5f02.xlsx]

## Sheet: Overview
Table S4
S4a: Cell type specific DEGs
Column	Description
Gene	gene symbol
CellType	cell type in DCN
LRT_gene	significance for likelihood ratio test (LRT) across conditions
log2FC_CD_vs_HC	log2(fold change) for CD vs HC comparison
p_val_CD_vs_HC	p-value for CD vs HC comparison
p_adj_CD_vs_HC	adjusted p-value using the Benjamini and Hochberg method for CD vs HC comparison
Direction_CD_vs_HC	direction which the gene is differentially expressed in the CD vs HC comparison
log2FC_TN_vs_HC	log2(fold change) for TN vs HC comparison
p_val_TN_vs_HC	p-value for TN vs HC comparison
p_adj_TN_vs_HC	adjusted p-value using the Benjamini and Hochberg method for TN vs HC comparison
Direction_TN_vs_HC	direction which the gene is differentially expressed in the TN vs HC comparison
log2FC_TN_vs_CD	log2(fold change) for TN vs CD comparison
p_val_TN_vs_CD	p-value for TN vs CD comparison
p_adj_TN_vs_CD	adjusted p-value using the Benjamini and Hochberg method for TN vs CD comparison
Direction_TN_vs_CD	direction which the gene is differentially expressed in the TN vs CD comparison
S4b: Functional enrichment analysis
Column	Description
CellType	cell type in DCN
Comparison	condition comparison in which DEGs are identified
Direction	direction in which the process is enriched in
ID	gene ontology (GO) ID
Description	description of GO biological process
GeneRatio	number of DEGs associated with the process / total number of DEGs in the corresponding cell type
BgRatio	number of genes associated with the process / total number all genes
pvalue	p-value
p.adjust	adjusted p-value
qvalue	q-value
geneID	gene symbol of DEGs associated with the process
Count	number of DEGs associated with the process
S4c: TF analysis
Column	Description
TF	gene symbol of transcription factor
CellType	cell type in DCN
avg_RAS	average regulon activity score (RAS) of TF within cell type
RSS_score	regulon specificity score (RSS) of TF within cell type
statistic_CD_vs_HC	test statistic used to compute the p-value for CD vs HC comparison
log2FC_CD_vs_HC	log2(fold change) of RAS median in CD vs HC comparison
wilcox_p_CD_vs_HC	p-value of Wilcoxon's test in CD vs HC comparison
wilcox_padj_CD_vs_HC	adjusted p-value of Wilcoxon's test using the bonferroni method in CD vs HC comparison
statistic_TN_vs_HC	test statistic used to compute the p-value for TN vs HC comparison
log2FC_TN_vs_HC	log2(fold change) of RAS median in TN vs HC comparison
wilcox_p_TN_vs_HC	p-value of Wilcoxon's test in TN vs HC comparison
wilcox_padj_TN_vs_HC	adjusted p-value of Wilcoxon's test using the bonferroni method in TN vs HC comparison
statistic_TN_vs_CD	test statistic used to compute the p-value for TN vs CD comparison
log2FC_TN_vs_CD	log2(fold change) of RAS median in TN vs CD comparison
wilcox_p_TN_vs_CD	p-value of Wilcoxon's test in TN vs CD comparison
wilcox_padj_TN_vs_CD	adjusted p-value of Wilcoxon's test using the bonferroni method in TN vs CD comparison

## Sheet: S4a
Gene	CellType	LRT_gene	log2FC_CD_vs_HC	p_val_CD_vs_HC	p_adj_CD_vs_HC	Direction_CD_vs_HC	log2FC_TN_vs_HC	p_val_TN_vs_HC	p_adj_TN_vs_HC	Direction_TN_vs_HC	log2FC_TN_vs_CD	p_val_TN_vs_CD	p_adj_TN_vs_CD	Direction_TN_vs_CD
1700085D07Rik	Astrocyte	1	-0.4273	0.006345	0.09487	None	-0.5024	0.001249	0.03065	Down	-0.06259	0.8233	0.9723	None
1810026B05Rik	Astrocyte	0	0.4549	0.0007312	0.02188	Up	0.2415	0.09334	0.4555	None	-0.1994	0.2292	0.7066	None
1810062O18Rik	Astrocyte	1	-0.03952	0.8843	0.9557	None	0.4323	0.004613	0.07582	None	0.4607	0.0001583	0.01171	Up
2210408I21Rik	Astrocyte	1	0.04462	0.4291	0.7351	None	0.5449	0.001616	0.03617	Up	0.4774	0.005671	0.1241	None
2610035D17Rik	Astrocyte	1	-0.7563	0.0001092	0.004959	Down	0.1133	0.7966	0.9493	None	0.9063	6.715e-08	2.006e-05	Up
4833411C07Rik	Astrocyte	1	0.1668	0.1263	0.462	None	0.4464	2.079e-05	0.001234	Up	0.2677	0.008152	0.1567	None
4930402H24Rik	Astrocyte	1	-0.421	6.557e-05	0.003168	Down	-0.2332	0.009792	0.1256	None	0.1724	0.2424	0.718	None
4930545L23Rik	Astrocyte	1	-1.173	1.709e-15	6.673e-13	Down	-1.866	5.186e-26	8.498e-23	Down	-0.6555	0.0005859	0.02917	Down
4930570B17Rik	Astrocyte	1	-0.5936	0.001412	0.03569	Down	-0.5791	0.003905	0.06791	None	0.06571	0.8231	0.9723	None
4930594M22Rik	Astrocyte	1	-0.3688	2.215e-05	0.001341	Down	-0.2168	0.06197	0.3724	None	0.1434	0.09947	0.522	None
4932438H23Rik	Astrocyte	1	0.4059	0.0001231	0.005492	Up	0.8344	1.147e-10	2.455e-08	Up	0.3196	0.03017	0.3145	None
4933411O13Rik	Astrocyte	1	-0.3056	0.01242	0.1455	None	-0.4183	0.0002963	0.01046	Down	-0.1136	0.2083	0.688	None
9330159F19Rik	Astrocyte	1	1.126	6.685e-12	1.684e-09	Up	1.192	4.03e-11	1.065e-08	Up	0.1037	0.4848	0.8811	None
9530026P05Rik	Astrocyte	1	0.4827	0.007456	0.1047	None	1.196	5.18e-11	1.326e-08	Up	0.6951	9.099e-05	0.007852	Up
9630028H03Rik	Astrocyte	1	1.306	1.096e-17	5.945e-15	Up	-1.281	9.314e-17	5.451e-14	Down	-2.563	2.814e-76	2.186e-72	Down
A230009B12Rik	Astrocyte	0	-0.3574	0.005429	0.08669	None	-0.4042	0.001477	0.03438	Down	-0.05355	0.8305	0.9755	None
A2m	Astrocyte	1	-0.2971	0.1562	0.5026	None	-0.6657	8.914e-05	0.00415	Down	-0.3811	0.0202	0.2585	None
A330076C08Rik	Astrocyte	1	-0.5071	0.01621	0.1704	None	-0.7255	0.0004141	0.01352	Down	-0.1794	0.5664	0.9089	None
A730020M07Rik	Astrocyte	1	0.4681	2.211e-05	0.001341	Up	0.1802	0.03197	0.2584	None	-0.2879	0.04371	0.3686	None
A830008E24Rik	Astrocyte	1	0.3843	0.00147	0.03678	Up	-0.01119	0.3487	0.7475	None	-0.3827	0.003819	0.09954	None
AC149090.1	Astrocyte	1	-0.787	2.12e-05	0.001312	Down	0.7012	2.216e-06	0.0001872	Up	1.417	4.91e-21	6.356e-18	Up
AW047730	Astrocyte	1	-0.24	0.1568	0.5034	None	-0.5225	0.0005145	0.01615	Down	-0.2358	0.07925	0.4766	None
AY036118	Astrocyte	1	1.122	5.63e-22	5.495e-19	Up	0.6249	1.899e-09	2.992e-07	Up	-0.4406	0.0002912	0.01781	Down
Aarsd1	Astrocyte	1	0.3673	0.0004026	0.0138	Up	0.2333	0.1192	0.5	None	-0.1109	0.08417	0.4886	None
Abcf1	Astrocyte	0	0.1409	0.1315	0.4682	None	0.3737	0.00215	0.04461	Up	0.2249	0.1322	0.5802	None
Abi1	Astrocyte	1	0.1919	0.07443	0.3644	None	0.4895	0.0005058	0.01606	Up	0.3632	0.05823	0.4196	None
Ablim2	Astrocyte	1	-0.6251	0.0001556	0.006602	Down	-0.6393	1.069e-05	0.0007183	Down	-0.08193	0.4131	0.8369	None
Abr	Astrocyte	0	-0.1068	0.3935	0.7113	None	0.1333	0.1395	0.5393	None	0.2615	0.0007177	0.03318	Up
Abtb2	Astrocyte	1	-0.1522	0.4604	0.7537	None	0.3543	0.03107	0.2562	None	0.5235	0.0001045	0.008727	Up
Acaca	Astrocyte	1	-0.005877	0.9777	0.9891	None	0.5907	0.0005872	0.01777	Up	0.569	0.0003987	0.02228	Up
Acsl3	Astrocyte	1	-0.2029	0.04109	0.2742	None	-0.4023	7.968e-05	0.003774	Down	-0.2552	0.04857	0.3858	None
Acsm5	Astrocyte	1	-0.0006312	0.9891	0.9949	None	-0.2854	0.003575	0.0641	None	-0.2812	0.0009274	0.04002	Down
Acss2	Astrocyte	1	-0.02386	0.5811	0.8251	None	0.5388	0.0006599	0.01945	Up	0.5984	0.0001216	0.009636	Up
Acss3	Astrocyte	1	0.8493	9.354e-07	8.261e-05	Up	1.043	1.811e-09	2.992e-07	Up	0.3139	0.1572	0.6171	None
Actb	Astrocyte	1	0.4659	0.0004028	0.0138	Up	0.02552	0.3519	0.7486	None	-0.437	0.004616	0.1103	None
Adam11	Astrocyte	1	-0.5139	1.885e-05	0.001177	Down	-0.4521	0.0002438	0.009205	Down	0.04921	0.8368	0.9766	None
Adcy8	Astrocyte	1	-0.4858	0.0001554	0.006602	Down	-0.6434	0.001139	0.02864	Down	-0.1645	0.1948	0.6695	None
Adgra1	Astrocyte	1	0.8814	9.558e-08	1.148e-05	Up	0.3988	0.06133	0.3703	None	-0.4915	0.001269	0.04856	Down
Afdn	Astrocyte	0	-0.5218	0.001461	0.03669	Down	-0.2972	0.1833	0.6014	None	0.2478	0.1425	0.5959	None
Aff1	Astrocyte	1	0.5377	0.0008991	0.02562	Up	0.889	4.334e-07	4.384e-05	Up	0.2819	0.1518	0.6089	None
Agpat4	Astrocyte	1	0.2005	0.02578	0.216	None	0.3179	0.0002978	0.01047	Up	0.1128	0.254	0.7295	None
Ahcyl1	Astrocyte	1	-0.1606	0.5895	0.8282	None	-0.6944	0.0002764	0.009933	Down	-0.617	0.0003581	0.02107	Down
Akap13	Astrocyte	1	0.2419	0.1718	0.5238	None	0.538	0.0006564	0.01944	Up	0.2484	0.08947	0.4984	None
Akap6	Astrocyte	1	-0.3525	0.005299	0.08495	None	-0.3279	0.002139	0.04449	Down	0.02069	0.1806	0.6508	None
Aldh7a1	Astrocyte	0	-0.4517	0.00218	0.04747	Down	-0.3005	0.09843	0.4683	None	0.1391	0.5082	0.89	None
Als2cl	Astrocyte	0	-0.2236	0.3831	0.7046	None	-0.5953	0.001903	0.0406	Down	-0.2992	0.1358	0.5842	None
Ank2	Astrocyte	1	0.1831	0.002245	0.04821	Up	0.07556	0.4369	0.7974	None	-0.06529	0.01079	0.179	None
Anxa6	Astrocyte	1	-0.3418	0.0002596	0.009838	Down	-0.202	0.04653	0.3162	None	0.1165	0.3005	0.7609	None
Aox1	Astrocyte	1	0.4464	0.002188	0.04747	Up	0.4316	0.002362	0.04814	Up	-0.07915	0.6942	0.9446	None
Apba1	Astrocyte	1	-0.4107	0.007797	0.1074	None	0.1819	0.3575	0.7515	None	0.6343	4.454e-06	0.0006653	Up
Aplp1	Astrocyte	1	0.6973	1.9e-06	0.0001578	Up	0.6159	0.0001222	0.005383	Up	-0.1561	0.4591	0.8653	None
Apod	Astrocyte	1	1.14	5.207e-13	1.452e-10	Up	1.248	1.445e-13	6.231e-11	Up	0.1377	0.6365	0.9356	None
Appl2	Astrocyte	1	-0.4441	0.03166	0.237	None	-0.6222	0.0002306	0.008787	Down	-0.2161	0.1442	0.5994	None
Aqp4	Astrocyte	1	-0.6444	2.927e-05	0.001693	Down	-0.7711	1.115e-06	0.0001026	Down	-0.1609	0.6298	0.9344	None
Arhgap26	Astrocyte	1	0.4155	0.01349	0.1518	None	0.5668	1.579e-05	0.0009884	Up	0.1754	0.05603	0.4156	None
Arhgef10l	Astrocyte	1	-0.3685	0.03591	0.2555	None	-0.6937	7.325e-05	0.003551	Down	-0.2667	0.08065	0.4797	None
Arhgef19	Astrocyte	1	-0.0368	0.2386	0.5968	None	-0.6575	0.000182	0.007275	Down	-0.5868	1.229e-05	0.001618	Down
Arhgef26	Astrocyte	0	0.5956	0.001993	0.04511	Up	0.308	0.08956	0.4472	None	-0.2116	0.353	0.8018	None
Arid1a	Astrocyte	1	-0.2914	0.09647	0.4091	None	0.324	0.1443	0.548	None	0.5912	0.0001613	0.01182	Up
Arntl	Astrocyte	0	-0.1872	0.2136	0.5714	None	-0.5284	0.00161	0.03617	Down	-0.2709	0.105	0.5379	None
Asic2	Astrocyte	1	1.059	1.701e-07	1.953e-05	Up	0.7578	0.0001449	0.006218	Up	-0.2824	0.2183	0.6955	None
Atp1b1	Astrocyte	1	-0.01768	0.8226	0.9316	None	-0.5266	0.0002216	0.008486	Down	-0.5032	8.979e-05	0.007836	Down
Atp2b2	Astrocyte	1	-0.5046	0.02935	0.2303	None	-1.131	1.465e-10	3.001e-08	Down	-0.6022	0.0001207	0.009636	Down
Atxn7l3b	Astrocyte	1	0.2011	0.05344	0.3075	None	-0.2062	0.3017	0.7106	None	-0.3937	8.354e-05	0.007458	Down
Azin1	Astrocyte	0	0.4977	0.001784	0.04184	Up	0.4204	0.01077	0.1345	None	-0.06985	0.7652	0.9604	None
Bbox1	Astrocyte	1	1.12	1.916e-12	4.987e-10	Up	0.8936	1.02e-09	1.778e-07	Up	-0.1686	0.6183	0.9306	None
Bcan	Astrocyte	1	-0.3164	0.00103	0.02831	Down	-0.227	5.725e-05	0.002878	Down	0.1473	0.5154	0.8919	None
Bhlhe40	Astrocyte	1	-0.3666	0.001713	0.04078	Down	-0.4104	0.00405	0.069	None	0.01525	0.8432	0.9774	None
Boc	Astrocyte	0	0.1664	0.5847	0.8269	None	0.5831	0.002422	0.04913	Up	0.4087	0.01304	0.2006	None
Brinp2	Astrocyte	1	0.4413	0.00165	0.03951	Up	0.7252	1.713e-05	0.001063	Up	0.2533	0.03753	0.3457	None
Brinp3	Astrocyte	0	0.6908	0.001777	0.0418	Up	0.2256	0.145	0.5488	None	-0.4105	0.05834	0.4196	None
Bsg	Astrocyte	1	0.1661	0.1738	0.5253	None	-0.5423	0.001602	0.03617	Down	-0.6979	1.306e-05	0.00169	Down
Btaf1	Astrocyte	0	0.2486	0.1936	0.5489	None	0.4805	0.001818	0.03948	Up	0.2216	0.08107	0.48	None
Btbd1	Astrocyte	0	0.1884	0.2698	0.6215	None	0.5458	0.001325	0.03192	Up	0.3294	0.08066	0.4797	None
C330002G04Rik	Astrocyte	1	0.1556	0.5536	0.8126	None	-0.5127	0.0002495	0.009293	Down	-0.5524	4.279e-05	0.004373	Down
Cables1	Astrocyte	1	-0.2319	0.1679	0.5189	None	0.3597	0.03443	0.268	None	0.6784	0.0002482	0.01654	Up
Cacnb2	Astrocyte	1	0.5158	0.015	0.1633	None	0.7312	3.101e-05	0.001672	Up	0.1833	0.05564	0.4143	None
Cadm1	Astrocyte	1	0.5532	0.0193	0.1852	None	1.068	2.248e-10	4.385e-08	Up	0.6222	1.122e-07	3.044e-05	Up
Cadps	Astrocyte	1	-0.5869	0.0001387	0.006051	Down	-0.5204	0.001126	0.02864	Down	0.07211	0.373	0.8121	None
Calm1	Astrocyte	1	0.2568	0.03207	0.2388	None	-0.3851	0.03288	0.2616	None	-0.6094	5.757e-05	0.005453	Down
Camk1d	Astrocyte	1	1.151	2.518e-11	5.783e-09	Up	1.444	4.014e-18	2.53e-15	Up	0.2021	0.03645	0.3413	None
Camk2n1	Astrocyte	1	0.3668	0.01664	0.1721	None	-0.1344	0.6528	0.9006	None	-0.4851	0.001225	0.04804	Down
Camsap2	Astrocyte	0	0.1754	0.238	0.5958	None	0.4228	0.001804	0.03942	Up	0.1818	0.2313	0.7099	None
Camta1	Astrocyte	1	0.5966	0.0008433	0.02448	Up	0.9149	1.018e-07	1.175e-05	Up	0.19	0.1922	0.6669	None
Car10	Astrocyte	1	-0.6504	5.227e-08	7.037e-06	Down	-0.2585	0.06805	0.3894	None	0.3361	0.0001358	0.01054	Up
Car2	Astrocyte	1	0.652	0.0001581	0.006671	Up	0.8187	7.623e-06	0.0005293	Up	0.2111	0.2099	0.6896	None
Ccdc107	Astrocyte	1	-0.05783	0.371	0.697	None	-0.4233	0.0006348	0.01905	Down	-0.3776	0.0004406	0.02393	Down
Ccdc34	Astrocyte	0	0.309	0.002165	0.04747	Up	0.2429	0.04371	0.3035	None	-0.07944	0.3645	0.8074	None
Ccdc85a	Astrocyte	1	0.08847	0.8198	0.9309	None	0.5308	3.925e-05	0.002036	Up	0.3628	0.001903	0.06453	None
Ccnt1	Astrocyte	1	0.4334	0.0003157	0.01141	Up	0.3494	0.00253	0.05056	None	-0.1069	0.6519	0.9361	None
Cd27	Astrocyte	1	0.2597	0.06371	0.3326	None	0.6834	2.268e-07	2.499e-05	Up	0.462	0.0003737	0.0215	Up
Cd302	Astrocyte	1	-0.3694	4.974e-06	0.0003629	Down	-0.224	0.04244	0.2985	None				None
Cdc37l1	Astrocyte	1	0.6809	6.564e-05	0.003168	Up	0.4045	0.01904	0.1945	None	-0.2815	0.2073	0.6872	None
Cdc42se2	Astrocyte	1	0.05139	0.2065	0.5649	None	-0.1174	0.00181	0.03943	Down	-0.1892	0.02476	0.2851	None
Cdh20	Astrocyte	1	0.02374	0.9091	0.9658	None	-0.2481	0.0001929	0.007616	Down	-0.2743	1.127e-05	0.001511	Down
Cdk11b	Astrocyte	1	0.4726	0.001893	0.04347	Up	0.08809	0.8143	0.9505	None	-0.3462	0.001131	0.04575	Down
Cdk8	Astrocyte	1	0.3807	0.0003125	0.0114	Up	0.424	7.828e-05	0.003729	Up	0.08696	0.7528	0.9584	None
Chd9	Astrocyte	1	-0.06426	0.2895	0.6356	None	-0.4201	2.758e-05	0.001548	Down	-0.4371	9.987e-07	0.0001763	Down
Chgb	Astrocyte	1	0.09417	0.6588	0.8618	None	-0.5214	7.596e-08	8.891e-06	Down	-0.6016	1.537e-11	7.956e-09	Down
Chka	Astrocyte	1	0.2141	0.01001	0.1262	None	0.6396	0.0004092	0.01341	Up	0.4086	0.03533	0.3371	None
Chpt1	Astrocyte	1	0.266	0.0002205	0.008782	Up	-0.07278	0.1139	0.4925	None	-0.3844	0.01114	0.1818	None
Chst9	Astrocyte	1	-0.388	0.005578	0.08798	None	0.2418	0.1785	0.5982	None	0.5975	2.137e-06	0.0003319	Up
Ciapin1	Astrocyte	0	0.3571	0.001364	0.0347	Up	0.3149	0.04676	0.3172	None	-0.07822	0.2681	0.7413	None
Ckb	Astrocyte	1	0.3092	0.0475	0.292	None	-0.7218	1.759e-16	9.607e-14	Down	-1.006	1.462e-26	2.839e-23	Down
Cklf	Astrocyte	1	0.4209	0.001168	0.03088	Up	0.2477	0.004904	0.07957	None	-0.1985	0.1074	0.5401	None
Cldn11	Astrocyte	1	0.1897	0.08948	0.3933	None	0.3906	0.0002192	0.008486	Up	0.1928	0.1046	0.5371	None
Clic4	Astrocyte	1	-0.7822	8.571e-05	0.003983	Down	-0.8437	1.796e-05	0.001103	Down	-0.0869	0.748	0.9578	None
Clybl	Astrocyte	1	-0.8098	8.067e-06	0.0005624	Down	-0.856	1.424e-05	0.000919	Down	-0.08979	0.6197	0.9307	None
Cmip	Astrocyte	0	-0.106	0.5373	0.8018	None	0.4139	0.07018	0.3939	None	0.5681	0.0007283	0.03344	Up
Cmss1	Astrocyte	1	0.9176	2.389e-06	0.0001923	Up	1.22	4.217e-12	1.382e-09	Up	0.3078	0.02594	0.2903	None
Cnpy1	Astrocyte	1	-0.3835	0.000433	0.01445	Down	-0.3675	0.00153	0.03513	Down	0.01664	0.9787	0.9968	None
Cobll1	Astrocyte	1	-0.4634	0.006633	0.09651	None	-0.6548	9.32e-05	0.004291	Down	-0.1922	0.3055	0.7641	None
Col1a1	Astrocyte	1	0.1225	0.3554	0.6881	None	-0.2402	0.03403	0.2665	None	-0.3307	0.0005057	0.02636	Down
Col5a3	Astrocyte	1	0.03446	0.07412	0.3638	None	-0.364	0.01125	0.1374	None	-0.3157	0.0007437	0.03351	Down
Cox5a	Astrocyte	1	0.5197	0.002089	0.04667	Up	0.02683	0.9634	0.9872	None	-0.5259	0.0004292	0.02355	Down
Cox6c	Astrocyte	1	0.4509	0.002044	0.04599	Up	-0.07456	0.2714	0.6907	None	-0.5036	0.0006428	0.03063	Down
Cpeb1	Astrocyte	1	0.1906	0.009332	0.1202	None	0.4742	0.0006256	0.01885	Up	0.3266	0.0365	0.3413	None
Cpeb2	Astrocyte	1	-0.361	0.02372	0.207	None	0.0254	0.5277	0.848	None	0.382	0.0009967	0.04176	Up
Cpeb3	Astrocyte	1	0.4963	0.01661	0.172	None	0.7108	0.0002397	0.009091	Up	0.2551	0.00363	0.09662	None
Cpeb4	Astrocyte	1	-0.4	0.08642	0.3878	None	-0.81	6.491e-05	0.003207	Down	-0.4131	0.02322	0.2772	None
Cpne2	Astrocyte	1	-0.4609	0.000803	0.02366	Down	-0.6089	1.161e-05	0.0007674	Down	-0.1525	0.3214	0.7764	None
Cpq	Astrocyte	1	0.1817	0.002254	0.04821	Up	-0.1499	0.5474	0.8556	None	-0.307	0.0002349	0.01587	Down
Cpsf7	Astrocyte	1	-0.3206	0.00125	0.03254	Down	-0.07516	0.04477	0.3088	None	0.2479	0.1172	0.5567	None
Crebbp	Astrocyte	1	0.2498	0.02005	0.1897	None	0.5984	7.802e-07	7.348e-05	Up	0.3847	0.01545	0.221	None
Crem	Astrocyte	1	-0.2657	0.05233	0.3045	None	0.2459	0.2142	0.6342	None	0.4489	0.001313	0.04949	Up
Crlf3	Astrocyte	1	0.02318	0.7262	0.8925	None	0.882	1.093e-06	0.0001018	Up	0.8316	2.527e-09	8.762e-07	Up
Cry1	Astrocyte	1	0.2505	0.006813	0.09793	None	0.3886	0.0003106	0.01073	Up	0.09985	0.0493	0.3892	None
Cryab	Astrocyte	1	0.6045	8.218e-06	0.0005678	Up	0.1913	0.2524	0.674	None	-0.4599	0.0005435	0.02777	Down
Cspp1	Astrocyte	1	0.6392	0.0002465	0.009576	Up	0.3703	0.1064	0.4801	None	-0.2016	0.1605	0.6217	None
Csrnp3	Astrocyte	0	0.1818	0.01153	0.1383	None	0.2989	0.001102	0.02837	Up	0.1522	0.466	0.8687	None
Ctnna2	Astrocyte	1	0.2227	0.4593	0.7527	None	-0.408	0.03706	0.2792	None	-0.663	0.001001	0.04176	Down
Ctnna3	Astrocyte	1	-0.7102	1.405e-05	0.0008875	Down	-0.7278	4.896e-06	0.0003681	Down	-0.05343	0.001765	0.06094	None
Ctnnd2	Astrocyte	1	-0.1002	0.01	0.1262	None	-0.1328	0.0003354	0.01136	Down	-0.02487	0.7712	0.9621	None
Cyhr1	Astrocyte	1	-0.5437	0.0001674	0.00699	Down	-0.2897	0.03041	0.2539	None	0.3038	0.06555	0.4382	None
Cyp26b1	Astrocyte	1	-0.6133	0.0009363	0.0263	Down	-0.4868	0.001334	0.03197	Down	0.07101	0.8802	0.9806	None
Dach1	Astrocyte	1	-0.4438	0.0001278	0.00564	Down	-0.3827	0.001425	0.03365	Down	-0.02014	0.6454	0.9356	None
Dalrd3	Astrocyte	1	0.1385	0.5045	0.7815	None	-0.3289	0.06252	0.3734	None	-0.5325	0.0001413	0.01073	Down
Dao	Astrocyte	1	0.3023	0.005857	0.09057	None	-0.4286	0.06458	0.3785	None	-0.7827	2.909e-07	5.793e-05	Down
Dbi	Astrocyte	1	0.01294	0.9828	0.9922	None	-0.5927	0.002244	0.04608	Down	-0.5477	0.00163	0.05711	None
Dclk1	Astrocyte	1	-0.06316	0.8853	0.9564	None	-0.4173	0.0004073	0.0134	Down	-0.4812	0.000256	0.01654	Down
Ddi1	Astrocyte	1	-0.4009	3.959e-05	0.002117	Down	-0.2137	0.1081	0.4814	None	0.2229	0.01795	0.2445	None
Dennd2a	Astrocyte	1	-0.5021	0.0002956	0.01094	Down	-0.5767	0.002331	0.04762	Down	-0.07026	0.3349	0.7863	None
Dgkb	Astrocyte	1	0.2093	0.07763	0.3711	None	-0.4477	1.58e-05	0.0009884	Down	-0.6909	7.929e-12	4.399e-09	Down
Dhrs3	Astrocyte	1	-0.2902	0.009543	0.1218	None	-0.4293	2.792e-05	0.001556	Down	-0.1465	0.1309	0.5772	None
Dio2	Astrocyte	1	0.4762	0.002034	0.0459	Up	-0.07753	0.7265	0.9252	None	-0.5586	1.653e-05	0.002006	Down
Dlg2	Astrocyte	1	-0.2252	0.3995	0.7154	None	0.5133	0.00341	0.06182	None	0.7351	1.586e-06	0.0002621	Up
Dmd	Astrocyte	1	0.3021	0.0002297	0.009058	Up	0.1518	0.0313	0.2564	None	-0.1147	0.4279	0.8472	None
Dnajb4	Astrocyte	1	0.373	6.227e-05	0.003117	Up	0.2434	0.1203	0.5014	None	-0.192	0.005804	0.1245	None
Dnajb6	Astrocyte	1	0.1612	0.0005067	0.01628	Up	0.224	0.002456	0.04968	Up	0.07968	0.4203	0.8404	None
Dnajc25	Astrocyte	0	0.3501	0.0005541	0.01745	Up	0.1513	0.06621	0.3825	None	-0.1842	0.1994	0.6753	None
Dnajc27	Astrocyte	1	-0.4103	0.003384	0.06352	None	-0.4893	0.0009068	0.02477	Down	-0.1108	0.5711	0.9102	None
Dock11	Astrocyte	1	-0.4106	0.0001926	0.007833	Down	-0.0676	0.7013	0.9191	None	0.3404	0.001035	0.04252	Up
Dock5	Astrocyte	1	0.5496	0.0003007	0.01107	Up	0.7322	5.273e-05	0.002683	Up	0.1791	0.5228	0.8942	None
Dpm1	Astrocyte	1	0.6211	5.956e-05	0.003	Up	0.1563	0.3659	0.7584	None	-0.4175	0.01024	0.1751	None
Dpysl2	Astrocyte	1	0.2432	0.001891	0.04347	Up	0.4105	0.007152	0.103	None	0.173	0.3555	0.8019	None
Dtx3	Astrocyte	1	-0.416	0.0252	0.2138	None	-0.9548	3.296e-08	4.22e-06	Down	-0.4774	0.001462	0.05381	None
Dtx4	Astrocyte	1	-0.2363	0.009125	0.1186	None	-0.4305	2.651e-05	0.001508	Down	-0.1535	0.161	0.6223	None
Dusp12	Astrocyte	1	-0.2149	0.01049	0.1295	None	0.2006	0.2437	0.6645	None	0.4459	0.0001743	0.01254	Up
E230001N04Rik	Astrocyte	1	0.4172	8.28e-07	7.431e-05	Up	0.1601	0.06882	0.3919	None	-0.2764	0.003035	0.08963	None
Ednrb	Astrocyte	1	-0.7247	0.0002449	0.00956	Down	-0.2013	0.5413	0.853	None	0.4828	0.01276	0.1995	None
Eef2k	Astrocyte	1	0.1367	0.3508	0.6851	None	0.5884	0.000512	0.01613	Up	0.4353	0.003597	0.09662	None
Efhd1	Astrocyte	0	-0.1794	0.01682	0.1731	None	-0.2976	0.0002784	0.009933	Down				None
Efr3b	Astrocyte	1	0.3268	0.0002162	0.008657	Up	0.4803	2.749e-05	0.001548	Up	0.1064	0.7608	0.9602	None
Efs	Astrocyte	0	-0.1881	0.02898	0.2283	None	0.05091	0.7635	0.9396	None	0.2568	0.001288	0.04904	Up
Egfr	Astrocyte	1	0.2772	0.01463	0.1602	None	0.4465	9.958e-05	0.004508	Up	0.1863	0.416	0.8382	None
Eif2b3	Astrocyte	0	0.2262	0.03895	0.2658	None	0.3274	0.00193	0.04107	Up	0.06711	0.7868	0.9672	None
Emid1	Astrocyte	1	-0.8225	7.163e-07	6.513e-05	Down	-0.658	0.0001113	0.004958	Down	0.1065	0.7199	0.9528	None
Enah	Astrocyte	1	0.9959	1.862e-09	3.16e-07	Up	0.8946	1.081e-10	2.455e-08	Up	-0.01065	0.2895	0.7568	None
Enho	Astrocyte	1	0.09299	0.1091	0.4361	None	-0.2935	0.001472	0.03438	Down	-0.3721	0.008419	0.1597	None
Errfi1	Astrocyte	1	0.603	5.561e-07	5.231e-05	Up	0.1584	0.3588	0.752	None	-0.4588	4.082e-05	0.004285	Down
Etv4	Astrocyte	1	-0.3541	0.0297	0.231	None	-0.5392	0.0005651	0.01728	Down	-0.1308	0.4174	0.8386	None
Etv5	Astrocyte	1	-0.4708	0.003453	0.06449	None	-0.529	0.001167	0.02917	Down	0.01546	0.5552	0.9042	None
Exoc4	Astrocyte	1	0.3688	0.02	0.1895	None	-0.1263	0.5263	0.8478	None	-0.463	0.0001923	0.01345	Down
F3	Astrocyte	1	-0.6842	3.722e-07	3.807e-05	Down	-0.7039	1.421e-06	0.0001252	Down	-0.03652	0.8813	0.9806	None
Fam117b	Astrocyte	1	0.1343	0.1572	0.5034	None	0.487	0.0001276	0.005586	Up	0.3151	0.006435	0.1336	None
Fam126a	Astrocyte	1	-0.1136	0.3941	0.7114	None	0.2711	0.02895	0.2485	None	0.3552	0.0002003	0.01388	Up
Fam155a	Astrocyte	1	-0.6886	1.378e-05	0.0008875	Down	-0.7677	4.55e-06	0.0003517	Down	-0.02161	0.8641	0.98	None
Fam214a	Astrocyte	1	0.5292	0.01263	0.1461	None	0.8477	6.971e-08	8.408e-06	Up	0.3329	0.0008416	0.03672	Up
Fam49a	Astrocyte	1	0.3439	3.387e-05	0.001889	Up	0.3944	7.55e-05	0.003622	Up	0.01773	0.9891	0.9981	None
Far1os	Astrocyte	1	-0.3492	0.00397	0.07072	None	0.08757	0.7108	0.921	None	0.3605	0.0006355	0.03047	Up
Farp1	Astrocyte	1	-0.4652	9.825e-17	4.29e-14	Down	-0.3042	7.498e-08	8.891e-06	Down	0.1169	0.008499	0.1599	None
Fastk	Astrocyte	1	-0.06002	0.3108	0.6506	None	-0.4677	0.0003074	0.01067	Down	-0.3523	0.001235	0.04822	Down
Fat3	Astrocyte	1	-0.5211	0.000186	0.007642	Down	0.04505	0.7879	0.9472	None	0.5157	1.9e-06	0.0003011	Up
Fbxl7	Astrocyte	1	-0.5137	1.376e-07	1.627e-05	Down	-0.3283	0.0004908	0.01571	Down	0.1694	0.1062	0.5401	None
Fbxo44	Astrocyte	1	0.1	0.492	0.774	None	-0.459	0.0136	0.1549	None	-0.526	0.0003876	0.02182	Down
Fdft1	Astrocyte	1	0.3371	0.002981	0.05891	None	0.6158	1.305e-06	0.0001175	Up	0.2328	0.1078	0.5401	None
Fgd6	Astrocyte	0	0.1214	0.1043	0.4256	None	0.1623	0.001754	0.03842	Up	0.03971	0.455	0.8621	None
Fgf1	Astrocyte	1	0.06706	0.8777	0.9536	None	0.5646	0.0006878	0.01998	Up	0.5521	0.001338	0.04997	Up
Fgf14	Astrocyte	1	-0.3324	0.004305	0.07481	None	-0.1982	0.4194	0.7895	None	0.1941	0.0003707	0.02149	Up
Fgfr2	Astrocyte	1	-0.253	0.001018	0.02807	Down	-0.297	0.0001396	0.006051	Down	-0.1173	0.4532	0.8618	None
Fhit	Astrocyte	0	0.3093	0.2771	0.6267	None	0.7027	0.001567	0.03575	Up	0.3821	0.07461	0.4658	None
Fibin	Astrocyte	1	0.5911	6.364e-08	8.422e-06	Up	0.4391	0.001232	0.03031	Up	-0.1416	0.03481	0.335	None
Fkbp2	Astrocyte	1	-0.05817	0.5822	0.8259	None	-0.5706	7.558e-05	0.003622	Down	-0.5073	2.229e-05	0.002584	Down
Fkbp5	Astrocyte	1	0.9808	9.565e-14	3.112e-11	Up	1.56	3.853e-24	4.51e-21	Up	0.5145	0.002506	0.07816	None
Flrt2	Astrocyte	1	0.4357	0.0009994	0.02767	Up	0.5331	0.0005522	0.01708	Up	0.08135	0.8047	0.9705	None
Fnbp1l	Astrocyte	1	0.2773	0.04653	0.2905	None	0.5561	0.0003064	0.01067	Up	0.261	0.1561	0.6163	None
Folh1	Astrocyte	0	0.1707	0.4407	0.7421	None	0.4686	0.001901	0.0406	Up	0.2814	0.0422	0.3614	None
Foxo1	Astrocyte	1	0.5053	0.0003256	0.01166	Up	0.3912	6.289e-06	0.000452	Up	-0.1959	0.1732	0.6382	None
Foxo3	Astrocyte	1	0.04791	0.8195	0.9307	None	0.598	0.0008446	0.02377	Up	0.4983	0.004503	0.109	None
Foxp1	Astrocyte	0	-0.4055	0.05181	0.3035	None	-0.6879	0.001389	0.03289	Down	-0.2354	0.3719	0.8109	None
Frg1	Astrocyte	1	0.2686	0.0002556	0.009741	Up	0.1191	0.03514	0.2712	None	-0.1756	0.1215	0.5615	None
Frrs1l	Astrocyte	1	-0.3502	0.000917	0.02603	Down	-0.346	0.002613	0.05162	None	-0.02231	0.9325	0.9879	None
Fry	Astrocyte	1	0.03928	0.7718	0.9108	None	0.1837	0.0004188	0.01362	Up	0.1798	0.0007318	0.03344	Up
Fstl1	Astrocyte	1	0.478	6.799e-05	0.003237	Up	0.5338	5.782e-06	0.0004193	Up	0.02148	0.8923	0.9806	None
Fth1	Astrocyte	1	0.9544	2.827e-07	3.065e-05	Up	0.5237	0.00486	0.07901	None	-0.4381	0.03297	0.3259	None
Fus	Astrocyte	1	-0.2586	0.03067	0.2343	None	-0.5849	0.005059	0.08144	None	-0.3821	0.0009401	0.04034	Down
Fut8	Astrocyte	0	0.4317	0.000471	0.01545	Up	0.2158	0.2316	0.6515	None	-0.1765	0.1353	0.5835	None
Fut9	Astrocyte	1	0.1805	0.0002736	0.01017	Up	0.1384	0.001359	0.03238	Up	-0.03605	0.9651	0.9945	None
Gab2	Astrocyte	1	0.8698	9.941e-09	1.584e-06	Up	1.253	4.962e-12	1.564e-09	Up	0.4173	0.04418	0.3701	None
Gabbr1	Astrocyte	1	0.3661	0.001611	0.03881	Up	0.5523	0.002621	0.05162	None	0.2016	0.04831	0.3853	None
Gabbr2	Astrocyte	1	-0.8113	4.315e-06	0.0003271	Down	-1.087	4.608e-10	8.781e-08	Down	-0.2909	0.06866	0.4489	None
Gadd45g	Astrocyte	1	-0.2278	0.2424	0.6	None	-0.8769	2.6e-09	3.946e-07	Down	-0.7107	1.854e-07	4.578e-05	Down
Galnt18	Astrocyte	1	0.1813	0.2489	0.6051	None	0.4251	0.002137	0.04449	Up	0.3175	8.234e-05	0.007436	Up
Gapdh	Astrocyte	1	0.6216	0.0001506	0.006497	Up	0.1333	0.284	0.6962	None	-0.4713	0.00797	0.1559	None
Garem1	Astrocyte	1	0.5128	0.01073	0.1309	None	1.034	2.577e-08	3.405e-06	Up	0.5169	0.002124	0.06903	None
Gigyf2	Astrocyte	1	0.4443	0.01929	0.1852	None	0.495	0.001481	0.03438	Up	0.02323	0.2494	0.7235	None
Gk	Astrocyte	1	0.7103	0.000427	0.01437	Up	0.2974	0.2912	0.7027	None	-0.4026	0.05463	0.4104	None
Gli2	Astrocyte	1	-0.1394	0.2481	0.6045	None	-0.5054	0.002799	0.05408	None	-0.3821	4.959e-05	0.004891	Down
Gli3	Astrocyte	0	0.1818	0.1137	0.4432	None	0.5314	0.001351	0.03229	Up	0.3501	0.1153	0.5561	None
Glul	Astrocyte	1	1.459	2.451e-26	3.827e-23	Up	0.4725	0.001055	0.02752	Up	-0.9506	2.539e-13	1.643e-10	Down
Gm11146	Astrocyte	1	-0.4515	0.000596	0.01825	Down	-0.2664	0.01216	0.1439	None	0.2391	0.05629	0.4169	None
Gm11149	Astrocyte	1	-0.4514	0.0261	0.2172	None	0.2414	0.3166	0.7231	None	0.717	6.938e-06	0.0009797	Up
Gm12224	Astrocyte	1	-0.755	1.546e-07	1.801e-05	Down	-0.5926	0.0002776	0.009933	Down	0.1888	0.2748	0.7476	None
Gm13266	Astrocyte	1	0.1464	0.5171	0.7898	None	-0.4096	0.01802	0.1881	None	-0.5429	7.473e-05	0.00691	Down
Gm13293	Astrocyte	0	0.3248	0.002109	0.04667	Up	0.08402	0.7319	0.9271	None	-0.2227	0.02132	0.2656	None
Gm13832	Astrocyte	1	-0.04937	0.3833	0.7046	None	-0.3622	0.0009489	0.02558	Down	-0.2798	0.0006228	0.03023	Down
Gm15283	Astrocyte	1	-0.5482	0.0002011	0.008134	Down	0.1872	0.3003	0.7098	None	0.7036	3.488e-05	0.003723	Up
Gm15520	Astrocyte	1	-0.9696	1.748e-08	2.576e-06	Down	-1.284	7.122e-14	3.242e-11	Down	-0.2939	0.09373	0.508	None
Gm15563	Astrocyte	0	-0.3776	0.001711	0.04078	Down	-0.2148	0.1443	0.548	None	0.1647	0.1939	0.6687	None
Gm16183	Astrocyte	1	-0.374	0.0001555	0.006602	Down	-0.3439	0.001515	0.03487	Down	0.03693	0.4605	0.866	None
Gm17106	Astrocyte	1	-0.5655	0.003295	0.06268	None	0.03666	0.9429	0.9817	None	0.5963	0.0003089	0.01859	Up
Gm20275	Astrocyte	1	-0.5898	0.001561	0.03841	Down	-0.08916	0.2412	0.6616	None	0.5278	0.0004462	0.02407	Up
Gm20713	Astrocyte	1	0.404	7.824e-06	0.0005504	Up	0.4489	0.00106	0.02752	Up	0.1373	0.1156	0.5564	None
Gm2115	Astrocyte	1	-0.2411	0.001844	0.04311	Down	-0.1035	0.1915	0.6133	None	0.2109	0.03208	0.3223	None
Gm21798	Astrocyte	1	-0.7008	6.572e-05	0.003168	Down	-0.5228	0.003983	0.06855	None	0.2071	0.3717	0.8109	None
Gm26672	Astrocyte	1	-0.5325	0.0003854	0.01343	Down	-0.378	0.03711	0.2792	None	0.1733	0.3314	0.7833	None
Gm26691	Astrocyte	1	0.2098	0.02769	0.2245	None	0.517	0.0008759	0.02423	Up	0.2545	0.16	0.6217	None
Gm26827	Astrocyte	1	-0.3974	0.001564	0.03841	Down	-0.3956	0.007506	0.1064	None	0.03628	0.2852	0.7531	None
Gm28375	Astrocyte	1	-0.5466	8.166e-05	0.003818	Down	-0.3921	0.01927	0.1961	None	0.1894	0.2115	0.6916	None
Gm29478	Astrocyte	1	-0.5406	1.058e-06	9.181e-05	Down	-0.4877	7.178e-06	0.0005071	Down	-0.009296	0.9833	0.9971	None
Gm30054	Astrocyte	1	-0.4957	0.0003106	0.01138	Down	-0.4216	0.006202	0.09357	None	0.05071	0.2307	0.7094	None
Gm30524	Astrocyte	1	0.02249	0.1192	0.4523	None	-0.3632	0.003898	0.06791	None	-0.3854	1.128e-05	0.001511	Down
Gm31224	Astrocyte	1	-0.706	5.525e-06	0.0003958	Down	-0.6362	0.0002216	0.008486	Down	0.09738	0.7323	0.9545	None
Gm35188	Astrocyte	1	-0.7778	3.615e-18	2.352e-15	Down	-0.5164	2.926e-09	4.359e-07	Down	0.2324	0.02187	0.2684	None
Gm3764	Astrocyte	1	-0.3165	9.9e-16	4.068e-13	Down	-0.4871	6.497e-29	1.775e-25	Down	-0.1773	0.0003852	0.02182	Down
Gm39214	Astrocyte	1	-0.3394	0.0005628	0.01765	Down	-0.3567	0.001565	0.03575	Down	-0.0007802	0.9974	0.999	None
Gm42726	Astrocyte	1	-0.2468	0.0467	0.291	None	-0.3956	0.0007221	0.02083	Down	-0.09569	0.2134	0.6931	None
Gm42948	Astrocyte	0	-0.3348	0.0003706	0.01298	Down	-0.1389	0.3348	0.7348	None	0.139	0.151	0.608	None
Gm43091	Astrocyte	1	0.3048	0.0001185	0.00532	Up	0.3547	0.0006395	0.01912	Up	-0.005061	0.2765	0.7486	None
Gm47271	Astrocyte	1	-0.8101	9.491e-06	0.000628	Down	-0.356	0.1511	0.5583	None	0.4964	0.0005638	0.02825	Up
Gm47283	Astrocyte	1	-0.3641	0.02317	0.2048	None	0.6655	5.619e-06	0.0004148	Up	1.07	1.545e-13	1.091e-10	Up
Gm48383	Astrocyte	1	-0.4904	4.465e-06	0.000332	Down	-0.2964	0.02318	0.2193	None	0.1455	0.2131	0.693	None
Gm48742	Astrocyte	1	-0.9926	6.187e-10	1.153e-07	Down	-0.6074	0.0005877	0.01777	Down	0.3195	0.02648	0.2946	None
Gm48747	Astrocyte	1	-0.6032	0.0001484	0.006437	Down	-0.8106	2.801e-07	2.981e-05	Down	-0.2143	0.2009	0.6774	None
Gm49164	Astrocyte	1	0.5838	2.217e-06	0.0001803	Up	0.1704	0.3396	0.7415	None	-0.4134	0.001816	0.06241	None
Gm49171	Astrocyte	0	0.3799	0.001589	0.03866	Up	0.1932	0.2261	0.6447	None	-0.1926	0.1651	0.6296	None
Gm5089	Astrocyte	1	-0.9813	7.964e-08	9.859e-06	Down	-1.14	6.213e-10	1.131e-07	Down	-0.1479	0.5033	0.8891	None
Gm9925	Astrocyte	1	1.275	9.93e-15	3.692e-12	Up	0.7738	3.789e-07	3.881e-05	Up	-0.4995	0.008058	0.1561	None
Golga1	Astrocyte	1	-0.3864	0.005834	0.09056	None	-0.4597	0.0006511	0.0194	Down	-0.06462	0.5428	0.9021	None
Gpc5	Astrocyte	1	0.974	6.481e-10	1.177e-07	Up	0.9188	6.447e-12	1.887e-09	Up	0.09709	0.3707	0.8108	None
Gpc6	Astrocyte	1	-0.5722	2.134e-05	0.001312	Down	-0.6115	0.001862	0.04005	Down	-0.0198	0.1067	0.5401	None
Gpld1	Astrocyte	1	0.6436	0.003225	0.06187	None	0.9252	6.293e-07	6.066e-05	Up	0.3327	0.01838	0.2472	None
Gpm6a	Astrocyte	1	-0.8024	2.318e-05	0.001382	Down	-0.4039	0.02333	0.2202	None	0.3515	0.1324	0.5802	None
Gpm6b	Astrocyte	0	-0.2714	0.002103	0.04667	Down	-0.09536	0.2566	0.6796	None	0.1863	0.1878	0.6605	None
Gpr158	Astrocyte	1	0.3783	0.01867	0.1816	None	0.8319	1.579e-05	0.0009884	Up	0.3412	0.154	0.6126	None
Gpr162	Astrocyte	1	-0.757	7.149e-09	1.188e-06	Down	-0.5561	0.0001761	0.007107	Down	0.2467	0.05859	0.4196	None
Gpr37l1	Astrocyte	1	-0.715	6.56e-05	0.003168	Down	-0.1632	0.4666	0.8131	None	0.5704	0.00151	0.05438	None
Gramd3	Astrocyte	1	-0.186	0.0008627	0.02495	Down	-0.06782	0.003854	0.06776	None	0.1093	0.8152	0.9712	None
Greb1l	Astrocyte	1	-0.5744	9.708e-06	0.000637	Down	-0.3212	0.03515	0.2712	None	0.1837	0.219	0.6964	None
Gria2	Astrocyte	1	1.083	3.754e-07	3.807e-05	Up	1.142	1.566e-07	1.782e-05	Up	0.08476	0.6142	0.9291	None
Gria4	Astrocyte	1	-0.773	1.559e-06	0.0001309	Down	-0.2596	0.3045	0.7116	None	0.5535	0.000188	0.01328	Up
Grid2	Astrocyte	1	-0.4032	9.889e-17	4.29e-14	Down	-0.4552	1.09e-18	7.445e-16	Down	-0.08888	0.1227	0.5641	None
Grin2b	Astrocyte	1	-1.157	1.132e-17	5.945e-15	Down	-1.027	8.108e-13	3.02e-10	Down	0.1126	0.4845	0.8811	None
Grip1	Astrocyte	1	0.2774	0.2271	0.5839	None	0.5149	0.00168	0.0373	Up	0.2887	0.006123	0.1289	None
H3f3a	Astrocyte	1	0.4977	0.0007097	0.02139	Up	0.4003	0.00645	0.0961	None	-0.1616	0.4979	0.886	None
H3f3b	Astrocyte	1	0.1639	0.4016	0.7165	None	-0.363	0.03319	0.2635	None	-0.5152	0.0007158	0.03318	Down
Hdac8	Astrocyte	1	-0.01699	0.5039	0.7813	None	-0.249	8.058e-06	0.0005548	Down	-0.2581	0.0001142	0.009237	Down
Hepacam	Astrocyte	1	0.6246	1.394e-05	0.0008875	Up	0.3373	0.002417	0.04913	Up	-0.2926	0.1814	0.6525	None
Heph	Astrocyte	1	0.2568	0.002821	0.05706	None	0.6315	3.396e-05	0.001807	Up	0.2949	0.1181	0.5582	None
Hes1	Astrocyte	1	-0.3129	0.002842	0.05733	None	-0.3849	0.0001781	0.007154	Down	-0.08031	0.5397	0.9007	None
Hif3a	Astrocyte	1	0.6744	0.0004935	0.01592	Up	0.3254	0.01522	0.1671	None	-0.392	0.06026	0.422	None
Hivep1	Astrocyte	1	0.2439	0.06041	0.3254	None	-0.2164	0.1303	0.5218	None	-0.4552	0.001248	0.04824	Down
Hivep2	Astrocyte	1	0.7826	4.398e-05	0.00229	Up	0.3739	0.01092	0.1352	None	-0.4484	0.03107	0.3183	None
Hmg20b	Astrocyte	1	0.2311	0.03524	0.2526	None	-0.208	0.1726	0.5928	None	-0.4363	0.001183	0.04711	Down
Hmgcr	Astrocyte	1	0.3042	0.03865	0.2645	None	0.4497	0.0009811	0.02627	Up	0.1397	0.03879	0.3495	None
Hnrnpa2b1	Astrocyte	1	0.1337	0.03187	0.2381	None	-0.4593	7.894e-13	3.02e-10	Down	-0.6695	4.896e-27	1.268e-23	Down
Hnrnpdl	Astrocyte	1	0.2343	0.001158	0.03075	Up	-0.2704	0.3416	0.7424	None	-0.5394	1.69e-05	0.002019	Down
Homer2	Astrocyte	1	0.2847	0.01308	0.149	None	0.6328	4.517e-06	0.0003517	Up	0.2718	0.1066	0.5401	None
Hr	Astrocyte	1	0.5282	0.001128	0.03017	Up	0.08886	0.6145	0.8843	None	-0.42	0.007036	0.143	None
Hsp90ab1	Astrocyte	1	0.3822	0.0181	0.1786	None	-0.3887	0.04481	0.3088	None	-0.7787	9.793e-07	0.0001763	Down
Hspa5	Astrocyte	1	0.2672	0.1175	0.4506	None	-0.1664	0.2672	0.6884	None	-0.4329	0.001018	0.04206	Down
Hspa8	Astrocyte	1	0.4829	0.007838	0.1077	None	-0.2793	0.1394	0.5393	None	-0.7001	1.414e-06	0.0002387	Down
Hspd1	Astrocyte	1	0.386	0.0001025	0.004682	Up	0.2071	0.07956	0.4187	None	-0.1948	0.08675	0.4899	None
Htra1	Astrocyte	1	0.2289	0.2506	0.6066	None	-0.4309	0.0009191	0.02494	Down	-0.6157	2.158e-07	4.9e-05	Down
Id2	Astrocyte	1	-0.05326	0.9063	0.9642	None	-0.6783	0.0002536	0.009403	Down	-0.5955	0.0002762	0.0173	Down
Id4	Astrocyte	0	-0.3162	0.03317	0.2443	None	-0.4525	0.0008782	0.02423	Down	-0.1739	0.2324	0.7105	None
Idh1	Astrocyte	1	0.2667	0.0463	0.2899	None	0.1423	0.0001679	0.006948	Up	-0.1358	0.02221	0.271	None
Idh3b	Astrocyte	1	-0.1265	0.6352	0.8519	None	-0.8001	3.97e-06	0.0003128	Down	-0.5993	0.0003	0.01821	Down
Ifi27	Astrocyte	1	-0.2652	0.03083	0.2344	None	-0.5329	5.344e-07	5.275e-05	Down	-0.2259	0.005502	0.1222	None
Ifrd1	Astrocyte	1	0.6551	8.74e-05	0.004038	Up	0.4679	0.003573	0.0641	None	-0.2459	0.3161	0.7705	None
Il18	Astrocyte	1	0.3105	0.000241	0.009457	Up	0.224	0.02934	0.2496	None	-0.08626	0.2146	0.6931	None
Il1rapl1	Astrocyte	1	0.6431	0.0003458	0.01222	Up	0.5239	0.006928	0.1014	None	-0.1281	0.1248	0.567	None
Immp1l	Astrocyte	1	-0.6035	0.0005853	0.01818	Down	-0.4296	0.04287	0.3005	None	0.2045	0.3801	0.819	None
Impa1	Astrocyte	1	0.218	0.02949	0.2307	None	-0.1271	0.502	0.8368	None	-0.3605	0.0006872	0.03216	Down
Inpp4b	Astrocyte	1	0.6625	0.0004372	0.01453	Up	0.005333	0.9992	0.9998	None	-0.6566	0.0001659	0.01204	Down
Iqsec2	Astrocyte	1	0.1406	0.004114	0.07284	None	0.4772	0.0007565	0.0216	Up	0.2983	0.03524	0.3371	None
Irak2	Astrocyte	1	0.2212	0.2546	0.6101	None	-0.3515	0.08268	0.4271	None	-0.5654	0.0004305	0.02355	Down
Itgb8	Astrocyte	1	0.5	0.001313	0.03374	Up	0.5441	0.002483	0.04986	Up	0.03258	0.7118	0.9498	None
Itih5	Astrocyte	1	0.139	0.2392	0.5978	None	0.5605	0.0004949	0.01578	Up	0.4534	0.01747	0.2402	None
Itpk1	Astrocyte	1	-0.1698	0.1862	0.5412	None	0.2639	0.05635	0.3533	None	0.4307	0.0002552	0.01654	Up
Itpkb	Astrocyte	1	-0.5503	0.0005145	0.01646	Down	-0.9613	5.261e-12	1.596e-09	Down	-0.4437	0.001248	0.04824	Down
Itsn1	Astrocyte	1	0.2765	0.001589	0.03866	Up	-0.0498	0.06939	0.3919	None	-0.4443	0.02027	0.259	None
Jak1	Astrocyte	1	0.09259	0.41	0.7226	None	0.6962	0.000563	0.01728	Up	0.6001	0.001311	0.04949	Up
Kank1	Astrocyte	1	-0.7201	3.605e-08	5.118e-06	Down	-1.01	2.858e-19	2.129e-16	Down	-0.4068	0.0001235	0.009691	Down
Kansl1	Astrocyte	1	0.3397	0.002092	0.04667	Up	0.4323	0.001185	0.02932	Up	0.1107	0.7805	0.9657	None
Kcna2	Astrocyte	1	-0.3162	0.03455	0.2493	None	-0.504	0.0002607	0.009581	Down	-0.1814	0.205	0.6844	None
Kcnd2	Astrocyte	1	0.9563	6.203e-10	1.153e-07	Up	0.6125	1.855e-05	0.001126	Up	-0.195	0.2432	0.718	None
Kcnip3	Astrocyte	1	-0.2878	0.04116	0.2742	None	-0.6001	0.001005	0.02683	Down	-0.2296	0.009312	0.1676	None
Kcnj3	Astrocyte	1	-0.4484	4.203e-05	0.002217	Down	-0.4585	3.053e-05	0.001658	Down	-0.03334	0.9513	0.992	None
Kcnk1	Astrocyte	1	0.9459	3.687e-08	5.141e-06	Up	0.5477	0.001491	0.03451	Up	-0.4016	0.04411	0.37	None
Kcnma1	Astrocyte	1	1.494	1.291e-14	4.583e-12	Up	1.101	2.14e-09	3.309e-07	Up	-0.3105	0.1995	0.6753	None
Kcnn2	Astrocyte	0	0.3351	0.09313	0.4015	None	-0.1776	0.4949	0.8326	None	-0.5381	0.0008731	0.03789	Down
Kcnq3	Astrocyte	1	0.9851	7.923e-08	9.859e-06	Up	0.4801	0.007069	0.1024	None	-0.3975	0.03689	0.3419	None
Kcnt1	Astrocyte	1	0.5885	0.000387	0.01343	Up	0.5233	0.008303	0.1141	None	-0.1328	0.1087	0.542	None
Kifc3	Astrocyte	1	-0.3613	0.08176	0.3804	None	-0.8512	3.422e-06	0.0002776	Down	-0.4334	0.003627	0.09662	None
Klf12	Astrocyte	1	0.5761	0.001275	0.03307	Up	0.01291	0.5543	0.8582	None	-0.5386	0.003702	0.09713	None
Klf9	Astrocyte	1	0.7056	4.956e-05	0.002529	Up	0.1003	0.3636	0.7563	None	-0.5126	0.003635	0.09662	None
Klhl2	Astrocyte	1	0.2858	0.002513	0.05252	None	0.7674	2.397e-07	2.584e-05	Up	0.4182	0.006962	0.1423	None
Kmt2c	Astrocyte	1	0.6965	0.0003273	0.01167	Up	0.3015	0.2011	0.6243	None	-0.3982	0.03392	0.3305	None
Kmt5c	Astrocyte	1	-0.1827	0.05389	0.3085	None	-0.3597	0.002221	0.04574	Down	-0.1328	0.06684	0.443	None
Lair1	Astrocyte	0	0.2689	0.04328	0.2785	None	-0.1532	0.4543	0.8068	None	-0.4341	0.001265	0.04856	Down
Lcor	Astrocyte	1	0.09355	0.6334	0.8511	None	0.7169	0.0005258	0.01644	Up	0.564	0.003672	0.09701	None
Ldlr	Astrocyte	1	0.2541	0.02407	0.208	None	0.6182	9.481e-06	0.0006474	Up	0.3114	0.008781	0.1633	None
Ldlrad4	Astrocyte	1	-0.2758	0.2712	0.6224	None	0.539	0.000472	0.01517	Up	0.773	1.945e-07	4.578e-05	Up
Leng9	Astrocyte	1	-0.1333	0.1913	0.5463	None	0.3314	0.01985	0.2005	None	0.4505	0.0001129	0.00923	Up
Letm2	Astrocyte	1	0.4603	0.003193	0.06142	None	-0.04345	0.6571	0.9028	None	-0.495	0.0006867	0.03216	Down
Lgi1	Astrocyte	1	-0.1671	0.09079	0.3962	None	-0.3918	9.607e-06	0.0006506	Down	-0.218	0.02983	0.3118	None
Lhfpl3	Astrocyte	1	-0.9266	1.326e-08	2.03e-06	Down	0.006396	0.9809	0.995	None	0.9086	1.041e-09	4.042e-07	Up
Lifr	Astrocyte	1	0.3139	0.01252	0.1459	None	0.4013	0.0008199	0.02325	Up	0.02174	0.9236	0.9868	None
Limch1	Astrocyte	1	0.3947	0.008485	0.1141	None	0.3244	0.0001109	0.004958	Up	-0.05484	0.1682	0.6333	None
Lims1	Astrocyte	1	0.08586	0.03766	0.2609	None	0.5389	0.0002788	0.009933	Up	0.4902	0.00578	0.1245	None
Lin7c	Astrocyte	1	0.3101	0.000806	0.02366	Up	0.3011	0.02238	0.2147	None	-0.04138	0.1342	0.581	None
Lncpint	Astrocyte	1	0.1359	0.03159	0.2367	None	0.4575	0.0002558	0.009441	Up	0.4035	0.0422	0.3614	None
Lncppara	Astrocyte	1	-0.8391	3.338e-07	3.57e-05	Down	-0.7444	1.353e-06	0.0001205	Down	0.1539	0.6211	0.9308	None
Lonrf3	Astrocyte	1	0.3534	0.05238	0.3045	None	0.6928	0.0002067	0.008063	Up	0.3389	0.1141	0.5538	None
Lrig1	Astrocyte	1	-0.2879	0.08926	0.3933	None	-0.6552	4.638e-06	0.0003551	Down	-0.3811	0.03167	0.3207	None
Lrig3	Astrocyte	1	0.6051	8.832e-06	0.0005997	Up	0.4278	0.009412	0.1226	None	-0.1997	0.1645	0.6286	None
Lrmda	Astrocyte	1	0.06559	0.427	0.7336	None	0.6572	3.055e-05	0.001658	Up	0.5754	0.0004945	0.02625	Up
Lrp1b	Astrocyte	1	1.28	3.908e-21	3.051e-18	Up	0.6416	4.804e-07	4.8e-05	Up	-0.5326	2.944e-05	0.003314	Down
Lrp6	Astrocyte	1	0.4777	0.01626	0.1704	None	0.6024	0.001363	0.03238	Up	0.02726	0.6336	0.9349	None
Lrrc19	Astrocyte	1	-0.4528	0.0001596	0.006699	Down	-0.441	0.0009612	0.02582	Down	-0.02226	0.8027	0.9705	None
Lrrc4c	Astrocyte	1	0.3636	4.817e-07	4.701e-05	Up	0.2031	0.005641	0.08672	None	-0.1022	0.02297	0.2764	None
Lrrc58	Astrocyte	1	0.5209	0.003572	0.06578	None	0.626	0.0007768	0.0221	Up	0.04749	0.5185	0.8928	None
Lrrtm3	Astrocyte	1	-0.6986	6.511e-08	8.473e-06	Down	-0.6262	3.056e-06	0.0002504	Down	0.02433	0.4808	0.8782	None
Lsamp	Astrocyte	1	0.1571	3.572e-13	1.073e-10	Up	0.04211	0.09734	0.4655	None	-0.1068	1.901e-07	4.578e-05	Down
Lynx1	Astrocyte	1	0.07432	0.4644	0.7554	None	-0.2258	0.00675	0.09952	None	-0.2788	0.0004961	0.02625	Down
Lypla2	Astrocyte	0	-0.3144	0.0006331	0.01923	Down	-0.2126	0.05671	0.3544	None	0.1003	0.3546	0.8019	None
Macf1	Astrocyte	1	-0.05214	0.217	0.5749	None	-0.1725	1.775e-06	0.0001531	Down	-0.1375	0.000594	0.02938	Down
Madd	Astrocyte	0	-0.2875	0.002116	0.04667	Down	-0.1611	0.1963	0.6197	None	0.1071	0.3096	0.7658	None
Mag	Astrocyte	1	0.5394	4.174e-06	0.0003195	Up	0.5582	2.306e-06	0.0001928	Up	0.0157	0.9726	0.9957	None
Magi2	Astrocyte	1	0.1609	4.456e-06	0.000332	Up	0.0542	0.2178	0.6371	None	-0.08742	0.005667	0.1241	None
Mal	Astrocyte	1	0.6326	3.452e-07	3.594e-05	Up	0.725	2.996e-08	3.897e-06	Up	0.09213	0.6312	0.9344	None
Mamdc2	Astrocyte	1	-0.509	5.592e-05	0.002835	Down	-0.3095	0.04698	0.3178	None	0.2068	0.1214	0.5611	None
Manba	Astrocyte	1	-0.3992	9.481e-06	0.000628	Down	-0.3365	0.002468	0.04971	Down	0.1195	0.2924	0.7568	None
Map2k6	Astrocyte	1	0.6335	0.0001734	0.007164	Up	0.9716	2.287e-07	2.499e-05	Up	0.3318	0.1658	0.6305	None
Map4k4	Astrocyte	1	-0.6241	0.002317	0.04942	Down	-0.7861	2.832e-05	0.001568	Down	-0.1434	0.2182	0.6955	None
Map7d2	Astrocyte	1	0.4493	0.03044	0.2337	None	0.93	1.473e-06	0.0001284	Up	0.3973	0.05464	0.4104	None
Mapk4	Astrocyte	1	-0.2684	0.1098	0.4368	None	0.1086	0.0008959	0.02463	Up	0.3333	6.696e-05	0.006266	Up
Marf1	Astrocyte	0	0.47	0.001117	0.02996	Up	0.204	0.2917	0.7027	None	-0.2829	0.07351	0.4641	None
Mat2a	Astrocyte	1	0.6317	3.641e-05	0.001974	Up	0.5467	0.00759	0.1074	None	-0.1496	0.06192	0.4256	None
Mb21d2	Astrocyte	1	-0.04061	0.4546	0.7501	None	0.2046	0.001732	0.03816	Up	0.2557	0.008534	0.1601	None
Mbnl1	Astrocyte	1	0.1865	0.082	0.3807	None	0.54	0.0006686	0.0196	Up	0.3152	0.1372	0.5871	None
Mdga2	Astrocyte	1	0.5441	1.371e-12	3.692e-10	Up	0.09045	0.1587	0.5733	None	-0.3968	5.724e-15	4.94e-12	Down
Mdp1	Astrocyte	1	-0.2666	0.001733	0.04113	Down	-0.2961	0.002779	0.05384	None	-0.00517	0.8351	0.9756	None
Med12l	Astrocyte	1	0.3597	0.002252	0.04821	Up	0.6026	0.0001739	0.00709	Up	0.1988	0.4672	0.8693	None
Mef2c	Astrocyte	1	0.1077	0.538	0.8023	None	0.5159	6.616e-05	0.003246	Up	0.3506	0.002457	0.07726	None
Meg3	Astrocyte	1	0.7035	5.629e-06	0.0003996	Up	-0.8414	7.814e-09	1.123e-06	Down	-1.488	1.597e-24	2.481e-21	Down
Megf9	Astrocyte	1	0.321	0.0004184	0.01414	Up	0.7774	6.978e-08	8.408e-06	Up	0.4234	0.03937	0.3511	None
Mertk	Astrocyte	0	0.1811	0.1155	0.4479	None	0.4425	0.001031	0.0272	Up	0.2995	0.1176	0.5567	None
Mettl7a1	Astrocyte	1	0.5923	4.001e-05	0.002125	Up	0.6156	0.001468	0.03438	Up	-0.02237	0.4207	0.8404	None
Mfsd2a	Astrocyte	1	0.8398	4.591e-07	4.538e-05	Up	0.5127	0.007997	0.1118	None	-0.2995	0.1021	0.5304	None
Mgat5	Astrocyte	0	-0.5417	0.001744	0.04126	Down	-0.2592	0.3065	0.7131	None	0.2324	0.1676	0.6321	None
Mib1	Astrocyte	1	0.1248	0.4756	0.7637	None	0.6003	0.001297	0.03145	Up	0.5054	0.003515	0.09662	None
Mir100hg	Astrocyte	1	-0.2865	4.271e-05	0.002238	Down	-0.2027	0.01014	0.1289	None	0.0456	0.4078	0.8342	None
Mir9-3hg	Astrocyte	1	-0.5305	0.0005906	0.01819	Down	-0.4109	0.002469	0.04971	Down	0.1455	0.6629	0.939	None
Mllt10	Astrocyte	1	-0.3061	0.0001252	0.005553	Down	-0.2481	0.001312	0.0317	Down	0.09372	0.8672	0.9804	None
Mmp14	Astrocyte	1	-0.351	0.001943	0.04449	Down	-0.3647	0.002615	0.05162	None	0.01374	0.8266	0.9739	None
Mob3b	Astrocyte	1	-0.4877	0.0004078	0.0139	Down	-0.394	0.006873	0.1009	None	0.08477	0.2397	0.7164	None
Mog	Astrocyte	1	0.2336	0.01927	0.1852	None	0.3151	0.0005412	0.0168	Up	0.07927	0.1436	0.5984	None
Mrpl42	Astrocyte	0	0.2755	0.01569	0.1681	None	0.4031	0.002068	0.04335	Up	0.1117	0.3543	0.8019	None
Mrtfb	Astrocyte	0	0.03737	0.02922	0.2297	None	0.2216	0.001591	0.03612	Up	0.1707	0.339	0.7895	None
Msmo1	Astrocyte	1	0.369	0.0488	0.2958	None	0.9956	6.667e-11	1.655e-08	Up	0.5783	3.773e-06	0.0005746	Up
Mt1	Astrocyte	1	0.6433	5.318e-11	1.122e-08	Up	0.008941	0.4035	0.7819	None	-0.6401	1.253e-09	4.632e-07	Down
Mt2	Astrocyte	1	0.242	0.3975	0.7143	None	-0.4444	0.05204	0.3345	None	-0.7146	9.952e-05	0.008402	Down
Mxi1	Astrocyte	1	0.1542	0.5592	0.8143	None	0.6753	0.0002989	0.01047	Up	0.5019	0.002872	0.08645	None
Mzt1	Astrocyte	1	-0.1957	0.05604	0.3135	None	-0.3906	0.0002214	0.008486	Down	-0.1729	0.04015	0.3548	None
N4bp2l2	Astrocyte	1	0.3125	0.0002557	0.009741	Up	-0.0525	0.3229	0.7284	None	-0.3746	0.00485	0.1135	None
Nap1l5	Astrocyte	1	0.0568	0.907	0.9647	None	-0.4013	0.006194	0.09357	None	-0.4605	0.0003355	0.01989	Down
Nav3	Astrocyte	1	-0.2827	0.03037	0.2334	None	0.5687	0.004377	0.07289	None	0.923	5.688e-09	1.767e-06	Up
Ncam1	Astrocyte	1	-0.2499	0.1051	0.4266	None	0.1411	0.07717	0.413	None	0.4046	0.0004224	0.02343	Up
Ncam2	Astrocyte	1	-0.9805	2.635e-11	5.878e-09	Down	-0.8868	2.214e-11	6.048e-09	Down	0.007874	0.9217	0.9865	None
Nckap5	Astrocyte	1	-1.129	1.379e-09	2.393e-07	Down	-0.5735	5.319e-06	0.0003962	Down	0.4711	0.00524	0.119	None
Ndrg3	Astrocyte	1	0.5498	0.001983	0.04502	Up	0.8116	1.945e-08	2.656e-06	Up	0.2278	0.07321	0.4634	None
Ndufs1	Astrocyte	1	0.2037	0.1211	0.4551	None	0.5491	0.0002736	0.009918	Up	0.3236	0.07425	0.4656	None
Nebl	Astrocyte	1	-0.08061	0.2742	0.6244	None	-0.1607	0.0008988	0.02463	Down	-0.1105	0.04684	0.3782	None
Nedd9	Astrocyte	1	0.6681	9.06e-05	0.004161	Up	0.09493	0.4092	0.7843	None	-0.5962	0.0004993	0.02625	Down
Nf2	Astrocyte	1	0.838	4.429e-08	6.067e-06	Up	0.7176	2.36e-06	0.0001954	Up	-0.1934	0.2558	0.7308	None
Nfasc	Astrocyte	1	-0.3869	0.04905	0.2959	None	-0.7139	1.86e-06	0.0001587	Down	-0.3749	0.004884	0.1139	None
Nfkbia	Astrocyte	1	0.4465	4.789e-05	0.002476	Up	0.1835	0.288	0.6988	None	-0.3069	0.0009638	0.04113	Down
Nim1k	Astrocyte	1	0.5008	0.01651	0.1719	None	0.7812	0.0001547	0.006567	Up	0.3118	0.166	0.6306	None
Nkain2	Astrocyte	0	0.3718	0.0004015	0.0138	Up	0.3004	0.02317	0.2193	None	-0.0949	0.6788	0.9417	None
Nnat	Astrocyte	1	-1.347	3.746e-13	1.083e-10	Down	-0.6008	0.007481	0.1062	None	0.7094	3.396e-05	0.003715	Up
Npas3	Astrocyte	1	-0.2046	1.73e-11	4.093e-09	Down	0.03878	0.3555	0.7508	None	0.2381	2.165e-18	2.402e-15	Up
Nr1d2	Astrocyte	1	0.2069	0.143	0.4851	None	0.7256	1.225e-06	0.0001115	Up	0.4502	0.001666	0.05776	None
Nr6a1	Astrocyte	1	0.3296	0.1514	0.496	None	0.7636	0.000186	0.0074	Up	0.4084	0.04699	0.3786	None
Nrros	Astrocyte	1	1.385	5.054e-17	2.466e-14	Up	0.9092	5.249e-10	9.775e-08	Up	-0.4779	0.02478	0.2851	None
Nrxn1	Astrocyte	1	0.9386	9.694e-10	1.72e-07	Up	0.5546	0.0001975	0.007744	Up	-0.2262	0.1006	0.5256	None
Nsd1	Astrocyte	0	0.4184	0.002207	0.0476	Up	0.3919	0.01487	0.1642	None	-0.005751	0.8667	0.9804	None
Ntm	Astrocyte	1	-0.1549	5.362e-07	5.106e-05	Down	0.004032	0.9979	0.9993	None	0.1581	5.518e-09	1.767e-06	Up
Nup98	Astrocyte	1	0.5673	3.887e-05	0.002093	Up	0.7044	6.478e-08	8.043e-06	Up	0.05635	0.4981	0.886	None
Nxn	Astrocyte	1	0.163	0.5984	0.8322	None	0.5	0.0002472	0.009249	Up	0.312	0.006049	0.128	None
Ocrl	Astrocyte	1	0.6214	0.0004141	0.01406	Up	0.5019	0.001174	0.02919	Up	-0.1292	0.6896	0.9436	None
Olfm1	Astrocyte	1	-0.09678	0.2447	0.6024	None	-0.3103	8.029e-05	0.003781	Down				None
Olig2	Astrocyte	1	-0.2775	0.001037	0.02842	Down	-0.3107	0.0004436	0.01431	Down				None
Osbpl6	Astrocyte	1	0.3131	0.00601	0.09183	None	0.4808	0.0003451	0.01159	Up	0.1258	0.685	0.9435	None
Otud7a	Astrocyte	1	0.6796	6.319e-05	0.003143	Up	0.3869	0.02371	0.2227	None	-0.2631	0.1948	0.6695	None
Palld	Astrocyte	1	-0.722	2.601e-05	0.001527	Down	-0.152	0.01657	0.1765	None	0.5786	0.001173	0.04695	Up
Pard3bos1	Astrocyte	1	-0.6576	0.0002288	0.009058	Down	-0.4484	0.02071	0.2062	None	0.2156	0.3433	0.794	None
Parp3	Astrocyte	0	0.3153	0.0005256	0.01675	Up	0.176	0.1322	0.528	None	-0.1515	0.0957	0.5115	None
Pcdh11x	Astrocyte	1	0.6901	0.0001913	0.00782	Up	0.6555	0.002041	0.04289	Up	-0.06486	0.3563	0.8019	None
Pcdh17	Astrocyte	1	0.5676	6.54e-05	0.003168	Up	0.2	0.4048	0.7823	None	-0.2927	0.03638	0.3413	None
Pcdh7	Astrocyte	1	0.5096	3.417e-07	3.594e-05	Up	0.3319	0.002671	0.05223	None	-0.1092	0.2257	0.7034	None
Pcsk6	Astrocyte	1	-0.3822	0.000252	0.0097	Down	-0.1123	0.5822	0.8719	None	0.2332	0.01297	0.2005	None
Pde10a	Astrocyte	1	0.1423	0.09879	0.4153	None	-1.609	7.001e-28	1.434e-24	Down	-1.627	9.417e-34	3.657e-30	Down
Pde7b	Astrocyte	1	-0.05305	0.02973	0.231	None	-0.805	1.385e-09	2.364e-07	Down	-0.8214	1.137e-06	0.0001962	Down
Pde9a	Astrocyte	1	-0.4136	0.01162	0.1389	None	-0.6473	0.0001282	0.005586	Down	-0.2203	0.1074	0.5401	None
Pdgfd	Astrocyte	1	-0.9885	4.472e-07	4.477e-05	Down	-0.7219	0.0007556	0.0216	Down	0.1757	0.1132	0.5517	None
Pdk2	Astrocyte	1	0.8216	2.745e-07	3.018e-05	Up	0.407	0.02403	0.224	None	-0.4357	0.009341	0.1676	None
Per1	Astrocyte	1	0.389	0.006511	0.09608	None	0.521	0.0003515	0.01176	Up	0.11	0.404	0.8331	None
Per2	Astrocyte	1	0.25	0.03856	0.2644	None	0.5337	3.76e-05	0.001971	Up	0.222	0.1757	0.6413	None
Per3	Astrocyte	1	0.7982	3.801e-06	0.0002938	Up	1.81	2.523e-25	3.445e-22	Up	1.088	1.441e-10	6.996e-08	Up
Pex5l	Astrocyte	1	0.4286	5.231e-06	0.0003782	Up	0.1975	0.03756	0.2806	None	-0.242	0.01292	0.2005	None
Pfn2	Astrocyte	1	0.4515	0.001086	0.02945	Up	0.3286	0.005522	0.0857	None	-0.08774	0.3987	0.8301	None
Pgp	Astrocyte	0	0.4669	0.0009662	0.02694	Up	0.1938	0.3687	0.7592	None	-0.256	0.05328	0.4075	None
Phka1	Astrocyte	1	0.2805	0.08397	0.3854	None	-0.2865	0.00373	0.06615	None	-0.5189	0.0005285	0.02734	Down
Phyhd1	Astrocyte	1	0.549	3.603e-05	0.001974	Up	-0.1069	0.1905	0.6124	None	-0.625	0.0002898	0.01781	Down
Pigk	Astrocyte	1	-0.5063	0.0007373	0.02197	Down	-0.2352	0.2722	0.6913	None	0.335	0.02254	0.2736	None
Pkm	Astrocyte	0	0.2779	0.001883	0.04347	Up	0.1022	0.2347	0.6539	None	-0.1595	0.1276	0.5732	None
Pkp4	Astrocyte	1	-0.6598	0.0005355	0.01699	Down	-0.5666	0.003822	0.06735	None	0.06931	0.52	0.8935	None
Pla2g7	Astrocyte	1	-0.3069	2.541e-05	0.001503	Down	-0.4624	3.501e-06	0.0002808	Down	-0.1873	0.2631	0.7367	None
Plcb1	Astrocyte	1	-0.07358	0.004529	0.07755	None	-0.3229	3.703e-20	3.034e-17	Down	-0.2435	7.706e-15	5.985e-12	Down
Plce1	Astrocyte	1	0.06187	0.3704	0.6965	None	0.3693	1.803e-05	0.001103	Up	0.396	1.646e-07	4.261e-05	Up
Plcl1	Astrocyte	1	-0.02985	0.9441	0.9764	None	0.762	3.142e-07	3.301e-05	Up	0.824	9.058e-08	2.606e-05	Up
Plcl2	Astrocyte	1	-0.123	0.13	0.4673	None	0.4139	0.001687	0.03736	Up	0.5421	9.538e-05	0.008141	Up
Plekhg1	Astrocyte	1	-0.02164	0.5988	0.8323	None	0.6679	9.288e-05	0.004291	Up	0.6478	9.458e-07	0.0001749	Up
Plekhm2	Astrocyte	1	-0.2526	0.3704	0.6965	None	-0.7401	6.981e-05	0.003405	Down	-0.5344	0.001415	0.05233	None
Plekhm3	Astrocyte	1	-0.2198	0.03678	0.258	None	0.1958	0.1149	0.4929	None	0.4127	0.0009839	0.04153	Up
Plp1	Astrocyte	1	1.362	7.83e-19	5.558e-16	Up	1.122	7.708e-12	2.178e-09	Up	-0.1857	0.1414	0.5939	None
Plpp3	Astrocyte	1	-0.3199	0.06265	0.3309	None	0.1935	0.2	0.6239	None	0.5062	0.0003112	0.01859	Up
Plxdc2	Astrocyte	1	0.3431	0.01421	0.1572	None	0.763	1.286e-05	0.0008365	Up	0.3715	0.05045	0.3948	None
Pnisr	Astrocyte	1	0.008194	0.055	0.3106	None	-0.1428	0.09063	0.4502	None	-0.1605	0.0003798	0.02169	Down
Pnn	Astrocyte	1	0.6322	0.001428	0.03596	Up	-0.1894	0.2204	0.6397	None	-0.8556	1.137e-07	3.044e-05	Down
Pnpla6	Astrocyte	1	-0.243	0.007984	0.1092	None	-0.3312	0.0008588	0.02393	Down	-0.09996	0.2068	0.6866	None
Polr3c	Astrocyte	0	-0.1412	0.295	0.6409	None	-0.3798	0.002222	0.04574	Down	-0.219	0.06799	0.4464	None
Por	Astrocyte	1	0.08243	0.05743	0.3173	None	0.7388	7.568e-06	0.0005293	Up	0.6303	2.796e-05	0.003194	Up
Ppil4	Astrocyte	1	0.3649	0.001175	0.0309	Up	0.4911	0.0001704	0.007015	Up	0.1153	0.5855	0.9163	None
Ppil6	Astrocyte	1	0.3151	0.004639	0.07852	None	-0.3969	0.07698	0.4126	None	-0.6679	2.736e-07	5.744e-05	Down
Ppm1a	Astrocyte	1	0.3072	0.0009412	0.02634	Up	0.4784	0.001039	0.0272	Up	0.153	0.07075	0.4549	None
Ppp1r3c	Astrocyte	1	0.4701	0.0002679	0.01001	Up	0.5992	3.776e-05	0.001971	Up	0.06738	0.6994	0.9459	None
Pram1	Astrocyte	1	-0.3467	0.00706	0.1	None	-0.4101	0.0007217	0.02083	Down	-0.1082	0.3564	0.8019	None
Prdx6	Astrocyte	1	0.2394	7.739e-05	0.003654	Up	0.2269	1.107e-05	0.0007375	Up	-0.04745	0.7614	0.9602	None
Prex1	Astrocyte	0	-0.1504	0.5441	0.8054	None	-0.5142	0.001599	0.03617	Down	-0.269	0.06423	0.4323	None
Prkca	Astrocyte	1	-0.1165	0.1994	0.557	None	0.3789	1.209e-05	0.0007927	Up	0.4994	6.159e-10	2.518e-07	Up
Prkd1	Astrocyte	1	-0.04772	0.1223	0.4564	None	0.4486	3.53e-06	0.0002808	Up	0.5512	7.917e-05	0.007234	Up
Prodh	Astrocyte	1	0.6446	0.00176	0.04151	Up	0.09095	0.479	0.8234	None	-0.5705	0.0001866	0.01328	Down
Prpf4b	Astrocyte	1	0.2885	0.0523	0.3045	None	-0.3375	0.001974	0.0418	Down	-0.6664	5.413e-10	2.335e-07	Down
Prr14	Astrocyte	1	0.0635	0.406	0.7198	None	-0.565	0.0009349	0.02528	Down	-0.5905	0.0001423	0.01073	Down
Psd3	Astrocyte	0	-0.6661	0.001855	0.04323	Down	-0.3796	0.1026	0.4777	None	0.2477	0.2773	0.7488	None
Psmc6	Astrocyte	1	0.2817	0.1546	0.5003	None	-0.3443	0.142	0.543	None	-0.6187	0.000271	0.01725	Down
Ptch1	Astrocyte	1	-0.8481	2.022e-06	0.0001662	Down	-0.4951	0.0009101	0.02478	Down	0.3862	0.08293	0.4858	None
Ptgds	Astrocyte	1	3.491	1.898e-117	1.482e-113	Up	3.046	1.572e-84	1.288e-80	Up	-0.3948	5.011e-05	0.004891	Down
Ptpn11	Astrocyte	1	0.4653	9.171e-06	0.0006173	Up	0.5237	5.727e-06	0.000419	Up	0.04648	0.8308	0.9756	None
Ptprd	Astrocyte	1	0.4024	0.03567	0.2546	None	0.4659	0.0005338	0.01663	Up	0.149	0.2379	0.7157	None
Ptprj	Astrocyte	0	-0.3464	0.1871	0.5417	None	0.258	0.2084	0.6283	None	0.6456	0.0005002	0.02625	Up
Ptprz1	Astrocyte	1	-0.06796	0.144	0.4866	None	-0.2461	1.471e-05	0.0009416	Down	-0.2	3.887e-07	7.548e-05	Down
Pygb	Astrocyte	1	-0.209	0.003727	0.06758	None	0.3043	0.001651	0.03677	Up	0.4836	0.02005	0.2574	None
Qk	Astrocyte	1	-0.07211	0.1613	0.5096	None	-0.339	4.227e-14	2.037e-11	Down	-0.2927	5.255e-10	2.335e-07	Down
Rab11fip2	Astrocyte	1	0.3686	0.0001727	0.007164	Up	0.2048	0.002304	0.04721	Up	-0.1393	0.4674	0.8693	None
Rab24	Astrocyte	1	-0.3544	0.0004319	0.01445	Down	-0.587	0.0001478	0.006308	Down	-0.2354	0.01451	0.2135	None
Ralbp1	Astrocyte	1	1.231	6.929e-14	2.352e-11	Up	0.9477	1.375e-08	1.91e-06	Up	-0.2307	0.3455	0.7954	None
Ranbp9	Astrocyte	1	0.4302	0.001554	0.0384	Up	0.5921	0.0003245	0.01112	Up	0.07414	0.6369	0.9356	None
Rap1gap2	Astrocyte	1	0.2274	0.001885	0.04347	Up	0.2771	0.001109	0.0284	Up	0.02823	0.5905	0.9185	None
Rapgef3	Astrocyte	1	-0.04545	0.76	0.9072	None	-0.5934	0.001501	0.03464	Down	-0.5081	0.00197	0.06568	None
Rasal2	Astrocyte	1	0.1806	0.001042	0.02846	Up	-0.1223	0.008485	0.1153	None	-0.4142	0.03593	0.3404	None
Rasgrf1	Astrocyte	1	-0.5946	0.0009343	0.0263	Down	0.001941	0.4666	0.8131	None	0.5065	0.002431	0.07674	None
Raver2	Astrocyte	0	-0.3296	0.0008876	0.02539	Down	-0.07275	0.05888	0.3618	None	0.1769	0.3435	0.794	None
Rb1	Astrocyte	0	-0.3227	0.03986	0.2701	None	-0.5674	0.001121	0.02863	Down	-0.2956	0.1943	0.669	None
Rbfox2	Astrocyte	1	-0.1384	0.0007581	0.02242	Down	0.2717	9.693e-05	0.004437	Up	0.3735	0.1033	0.5344	None
Rbks	Astrocyte	1	-0.2906	0.0004788	0.01553	Down	-0.3614	0.007095	0.1024	None	-0.06968	0.3977	0.8295	None
Rbm3	Astrocyte	1	-0.2988	0.1288	0.4659	None	-0.5511	0.0006816	0.01988	Down	-0.2365	0.1134	0.5517	None
Rbm39	Astrocyte	1	-0.5144	2.744e-07	3.018e-05	Down	-0.3617	0.0001417	0.006112	Down	0.04318	0.6924	0.9442	None
Rbms1	Astrocyte	1	0.2552	0.01547	0.1669	None	0.5514	2.992e-05	0.001645	Up	0.244	0.1212	0.5611	None
Rcan2	Astrocyte	1	0.8819	6.484e-07	6.027e-05	Up	0.7709	2.199e-05	0.001287	Up	-0.1307	0.5518	0.9041	None
Rfc2	Astrocyte	0	-0.07069	0.5958	0.8313	None	-0.2762	0.001985	0.04191	Down				None
Rftn1	Astrocyte	1	-0.277	0.0006091	0.01858	Down	-0.1482	0.0624	0.3732	None	0.1084	0.2389	0.7158	None
Rfx4	Astrocyte	1	-0.07647	0.8979	0.96	None	-0.6585	0.001027	0.0272	Down	-0.5895	0.001597	0.05663	None
Rgl1	Astrocyte	1	-0.1569	0.03102	0.2352	None	0.2043	0.001061	0.02752	Up	0.3759	0.02162	0.2674	None
Rgs20	Astrocyte	1	-0.08244	0.9128	0.9668	None	-0.6256	0.003053	0.0575	None	-0.5481	0.001202	0.04762	Down
Rhob	Astrocyte	1	0.2929	0.0103	0.1284	None	-0.2029	0.2986	0.7089	None	-0.4618	0.0005502	0.02787	Down
Rhou	Astrocyte	1	1.724	7.301e-23	8.143e-20	Up	0.7387	1.963e-05	0.001183	Up	-1.025	2.595e-09	8.762e-07	Down
Ripor2	Astrocyte	0	-0.1796	0.2466	0.6039	None	0.1624	0.4018	0.7811	None	0.3931	0.001005	0.04176	Up
Rmdn1	Astrocyte	1	0.2761	0.1563	0.5026	None	-0.485	0.03517	0.2712	None	-0.7729	1.434e-05	0.001797	Down
Rmst	Astrocyte	1	0.745	3.636e-05	0.001974	Up	0.6305	9.864e-05	0.00449	Up	-0.1528	0.3593	0.8046	None
Rnf115	Astrocyte	1	0.3871	0.0003149	0.01141	Up	0.2963	0.06306	0.3746	None	-0.08975	0.2178	0.6953	None
Rnf25	Astrocyte	1	0.2737	0.09305	0.4014	None	-0.295	0.1159	0.4957	None	-0.5465	5.482e-05	0.005256	Down
Rnf7	Astrocyte	1	0.2909	0.001151	0.03066	Up				None	-0.2541	0.002849	0.08611	None
Rnft1	Astrocyte	0	0.06096	0.8261	0.9331	None	-0.2866	0.02701	0.2395	None	-0.3792	0.0005316	0.02734	Down
Rora	Astrocyte	1	0.1874	5.799e-10	1.132e-07	Up	0.1024	0.0002464	0.009249	Up	-0.09204	5.038e-05	0.004891	None
Rorb	Astrocyte	1	0.746	1.518e-11	3.704e-09	Up	0.5714	3.5e-08	4.412e-06	Up	-0.09825	0.2752	0.7476	None
Rpl18	Astrocyte	1	0.3334	0.01072	0.1309	None	-0.01021	0.8158	0.9505	None	-0.3789	0.001224	0.04804	Down
Rps13	Astrocyte	1	0.432	0.0004398	0.01455	Up	0.271	0.03677	0.2782	None	-0.1928	0.2614	0.7351	None
Rrp8	Astrocyte	1	0.3613	0.0004767	0.01553	Up	0.462	3.379e-05	0.001807	Up	0.1103	0.5852	0.9161	None
Rtn1	Astrocyte	0	-0.1575	0.3248	0.6633	None	-0.4932	0.001331	0.03197	Down	-0.3469	0.02372	0.28	None
Rtn3	Astrocyte	1	0.6455	2.953e-06	0.0002329	Up	0.9353	8.67e-11	2.03e-08	Up	0.3063	0.1176	0.5567	None
Sall2	Astrocyte	0	-0.497	0.002115	0.04667	Down	-0.4498	0.01361	0.1549	None	0.07463	0.6439	0.9356	None
Samd12	Astrocyte	1	-0.1321	0.08915	0.3933	None	-0.5325	0.002156	0.04461	Down	-0.3976	0.002049	0.06773	None
Scmh1	Astrocyte	0	0.2151	0.1652	0.5147	None	0.4539	0.00127	0.03105	Up	0.2099	0.2781	0.75	None
Sdc3	Astrocyte	1	-0.3288	0.03949	0.2686	None	-0.5792	0.0001619	0.006768	Down	-0.2164	0.1325	0.5802	None
Selenop	Astrocyte	1	0.5074	6.684e-05	0.003202	Up	0.5366	0.0001753	0.007107	Up	0.04197	0.6855	0.9435	None
Sema6d	Astrocyte	1	-0.8518	1.201e-08	1.876e-06	Down	-0.4961	0.001452	0.03419	Down	0.3045	0.05442	0.4104	None
Senp6	Astrocyte	1	-0.5234	0.001311	0.03374	Down	-0.02073	0.01485	0.1642	None	0.5191	0.00212	0.06903	None
Sertad2	Astrocyte	1	0.2948	0.1304	0.4674	None	0.5233	0.0002731	0.009918	Up	0.2469	0.0536	0.4081	None
Sesn1	Astrocyte	1	0.5047	0.002179	0.04747	Up	0.5943	0.003105	0.05796	None	0.08181	0.2323	0.7103	None
Setbp1	Astrocyte	1	-0.4805	0.001412	0.03569	Down	-0.478	0.001826	0.03948	Down	-0.02745	0.9495	0.9913	None
Setd2	Astrocyte	1	0.1829	0.0005919	0.01819	Up	0.1461	0.001105	0.02837	Up	-0.03395	0.9671	0.9945	None
Setd5	Astrocyte	1	-0.2724	0.001489	0.03691	Down	-0.08861	0.0003793	0.01258	None	0.1699	0.5239	0.8954	None
Sfxn5	Astrocyte	1	-0.5921	1.549e-08	2.326e-06	Down	-0.2338	0.0238	0.2227	None	0.3191	0.004757	0.1126	None
Sgk1	Astrocyte	1	0.4496	7.174e-07	6.513e-05	Up	0.3976	2.03e-05	0.001214	Up	-0.008994	0.6864	0.9436	None
Shisa9	Astrocyte	1	-0.2898	0.07724	0.3704	None	0.3806	0.02146	0.2093	None	0.6878	4.353e-05	0.004391	Up
Slc10a7	Astrocyte	1	0.523	4.593e-06	0.0003383	Up	0.7537	1.958e-12	6.685e-10	Up	0.1759	0.02842	0.3057	None
Slc13a3	Astrocyte	0	-0.0145	0.5296	0.7975	None	-0.2519	0.001296	0.03145	Down	-0.1759	0.0357	0.3386	None
Slc22a4	Astrocyte	1	-0.7202	0.0001162	0.005243	Down	-0.5009	0.02062	0.2061	None	0.2066	0.3447	0.7952	None
Slc24a4	Astrocyte	1	0.3816	0.08613	0.3874	None	0.5687	0.0001046	0.004711	Up	0.2571	0.02122	0.2654	None
Slc25a27	Astrocyte	1	0.01955	0.04374	0.2798	None	0.1346	0.001129	0.02864	Up	0.1241	0.4856	0.8815	None
Slc25a34	Astrocyte	1	0.01894	0.5155	0.7888	None	-0.4873	6.156e-05	0.003076	Down	-0.5041	6.062e-07	0.0001148	Down
Slc25a4	Astrocyte	1	0.2924	0.002552	0.05307	None	-0.2699	0.1242	0.5104	None	-0.5811	0.0002535	0.01654	Down
Slc27a1	Astrocyte	1	-0.3608	0.01468	0.1606	None	-0.7582	5.648e-07	5.509e-05	Down	-0.3735	0.02899	0.309	None
Slc38a1	Astrocyte	1	-1.351	1.078e-13	3.367e-11	Down	-1.218	6.366e-10	1.134e-07	Down	0.02259	0.197	0.6718	None
Slc38a3	Astrocyte	1	-0.2244	0.25	0.6065	None	-0.6078	0.0003383	0.01141	Down	-0.3503	0.05931	0.4213	None
Slc3a2	Astrocyte	1	0.6335	0.0002608	0.009838	Up	0.4264	0.03877	0.2865	None	-0.2256	0.2566	0.731	None
Slc4a4	Astrocyte	1	-0.1999	4.095e-11	8.883e-09	Down	-0.1628	1.313e-08	1.855e-06	Down	0.03211	0.4731	0.8737	None
Slc7a2	Astrocyte	0	0.1424	0.3387	0.6765	None	0.5415	0.002495	0.04999	Up	0.3312	0.1135	0.5522	None
Slc8a1	Astrocyte	0	-0.3237	0.002189	0.04747	Down	-0.1946	0.09736	0.4655	None	0.08218	0.5185	0.8928	None
Smarca2	Astrocyte	1	0.5227	0.01021	0.1276	None	0.7285	0.000392	0.01295	Up	0.287	0.253	0.7287	None
Smarca4	Astrocyte	0	-0.4317	0.002177	0.04747	Down	-0.3309	0.06621	0.3825	None	0.1302	0.388	0.8235	None
Smoc1	Astrocyte	1	-0.2032	0.08704	0.3883	None	0.3591	0.009902	0.1266	None	0.5465	1.685e-06	0.0002727	Up
Smpdl3a	Astrocyte	0	0.1581	0.2168	0.5748	None	-0.1716	0.1732	0.593	None	-0.3375	0.0008352	0.03665	Down
Smurf1	Astrocyte	1	0.02975	0.756	0.9061	None	0.4925	0.001996	0.04204	Up	0.4341	0.0006323	0.03047	Up
Snap25	Astrocyte	1	0.04549	0.7499	0.9032	None	-0.4245	0.0002626	0.009607	Down	-0.4431	1.488e-05	0.001834	Down
Sned1	Astrocyte	1	-0.7231	9.417e-07	8.261e-05	Down	-0.7419	4.734e-06	0.0003592	Down	-0.04522	0.363	0.8067	None
Snhg11	Astrocyte	1	0.3025	0.002585	0.0534	None	-0.8925	4.978e-09	7.284e-07	Down	-1.202	5.555e-18	5.393e-15	Down
Snhg20	Astrocyte	0	-0.4935	0.001584	0.03866	Down	-0.3182	0.03919	0.2875	None	0.1379	0.5603	0.9064	None
Sntb1	Astrocyte	1	0.09195	0.5317	0.7989	None	0.4736	0.0001714	0.007021	Up	0.3282	0.008821	0.1633	None
Snx32	Astrocyte	1	-0.1793	0.005488	0.08728	None	-0.3263	0.001571	0.03575	Down	-0.1699	0.4046	0.8331	None
Son	Astrocyte	1	0.1948	8.366e-06	0.000573	Up	0.1685	0.0001598	0.006715	Up	-0.01797	0.9046	0.9839	None
Sorl1	Astrocyte	1	-0.1815	0.6222	0.8441	None	-0.6992	0.001139	0.02864	Down	-0.5225	0.009752	0.1706	None
Sox5	Astrocyte	1	-0.4323	4.843e-05	0.002488	Down	-0.1633	0.1465	0.5517	None	0.2769	0.01591	0.2259	None
Sox5os2	Astrocyte	1	-0.3354	0.0008852	0.02539	Down	-0.1929	0.07779	0.4138	None	0.1545	0.128	0.5732	None
Sox5os4	Astrocyte	1	-0.5094	0.000742	0.02203	Down	-0.4022	0.02813	0.2447	None	0.1568	0.2689	0.7416	None
Sox8	Astrocyte	1	0.6763	1.267e-06	0.0001076	Up	0.3206	0.008825	0.1184	None	-0.3456	0.073	0.4628	None
Sox9	Astrocyte	1	0.07161	0.6653	0.8634	None	-0.4726	0.005329	0.08396	None	-0.4696	0.0007395	0.03351	Down
Spaca6	Astrocyte	1	0.2749	0.0007058	0.02136	Up	0.4264	0.0003273	0.01118	Up	0.1323	0.522	0.8941	None
Sparc	Astrocyte	0	0.5863	0.001891	0.04347	Up	0.3722	0.1048	0.4781	None	-0.1502	0.5897	0.9183	None
Spon1	Astrocyte	1	0.2612	0.008672	0.1152	None	0.2632	6.496e-05	0.003207	Up	0.03666	0.1383	0.5877	None
Spred1	Astrocyte	1	0.3147	0.006871	0.09844	None	-0.2011	0.5063	0.8383	None	-0.5588	0.0005526	0.02787	Down
Ssr3	Astrocyte	1	0.2871	0.001171	0.03088	Up	0.05193	0.8516	0.9587	None	-0.2101	0.008041	0.1561	None
St3gal4	Astrocyte	1	-0.1292	0.7181	0.8888	None	0.3095	0.01642	0.1759	None	0.3894	0.001172	0.04695	Up
St6galnac5	Astrocyte	1	-0.4579	0.0004794	0.01553	Down	-0.07162	0.7196	0.9239	None	0.3475	0.004295	0.1064	None
Stag1	Astrocyte	1	-0.5634	0.001102	0.02977	Down	-0.1487	0.1043	0.4781	None	0.4094	0.06081	0.4229	None
Stard9	Astrocyte	1	-0.2457	0.01185	0.1406	None	0.02462	0.651	0.9004	None	0.2961	0.001338	0.04997	Up
Stim1	Astrocyte	1	0.2931	0.179	0.5304	None	0.6121	0.0005546	0.01708	Up	0.2461	0.2005	0.6767	None
Stk32a	Astrocyte	1	0.484	1.142e-17	5.945e-15	Up	0.5114	3.309e-21	3.389e-18	Up	0.08577	0.3714	0.8108	None
Stk4	Astrocyte	1	0.2993	0.00108	0.02937	Up	0.3447	0.001938	0.04113	Up	0.03104	0.7303	0.9537	None
Stmn1	Astrocyte	1	0.4896	3.235e-05	0.001843	Up	0.1544	0.1809	0.5997	None	-0.3261	0.003402	0.0953	None
Stmn2	Astrocyte	1	0.1518	0.2682	0.6202	None	-0.1973	0.04214	0.2982	None	-0.3643	4.159e-05	0.004308	Down
Stmn3	Astrocyte	1	0.09499	0.4619	0.7542	None	-0.3515	0.01145	0.1388	None	-0.4318	0.0001403	0.01073	Down
Stmn4	Astrocyte	1	0.3434	0.0009348	0.0263	Up	0.2195	0.05097	0.3314	None	-0.1271	0.3513	0.7996	None
Sugct	Astrocyte	1	-0.2216	0.2613	0.6152	None	0.6281	0.001893	0.0406	Up	0.8347	2.823e-07	5.771e-05	Up
Sult1a1	Astrocyte	1	0.4031	2.699e-06	0.0002151	Up	0.1738	0.05178	0.3341	None	-0.2474	0.0101	0.1736	None
Susd4	Astrocyte	0	0.2953	0.07869	0.3726	None	0.5111	0.001739	0.03821	Up	0.1684	0.3158	0.7705	None
Susd6	Astrocyte	1	0.4323	0.004646	0.07852	None	1.036	2.207e-08	2.965e-06	Up	0.6161	0.001389	0.05161	None
Suz12	Astrocyte	1	0.1835	0.1414	0.4827	None	0.4845	0.0003303	0.01123	Up	0.3253	0.08543	0.4894	None
Sybu	Astrocyte	0	-0.7163	0.0005867	0.01818	Down	-0.4909	0.03778	0.2814	None	0.216	0.4154	0.8382	None
Tab2	Astrocyte	1	-0.3438	0.0742	0.3639	None	0.2019	0.3376	0.7388	None	0.5322	0.0006143	0.03001	Up
Taf7l	Astrocyte	1	0.02784	0.3378	0.6759	None	-0.2806	0.0008723	0.02423	Down	-0.3103	0.0001091	0.009019	Down
Tafa1	Astrocyte	1	0.7024	7.768e-05	0.003654	Up	0.6479	0.0017	0.03754	Up	-0.07016	0.3491	0.7986	None
Tagln3	Astrocyte	1	-0.7757	2.653e-05	0.001546	Down	-0.6449	0.0008566	0.02393	Down	0.06891	0.3315	0.7833	None
Taok1	Astrocyte	1	-0.06857	0.6412	0.8551	None	0.5495	0.004039	0.06896	None	0.6418	0.0002576	0.01654	Up
Tapt1	Astrocyte	1	0.4514	0.004199	0.07352	None	0.4873	0.001826	0.03948	Up	0.0162	0.8477	0.9774	None
Tbc1d1	Astrocyte	1	0.2875	0.01945	0.1859	None	0.5041	4.255e-05	0.002181	Up	0.19	0.1603	0.6217	None
Tbc1d5	Astrocyte	1	0.358	0.008172	0.111	None	-0.07395	0.9265	0.9765	None	-0.4838	0.0003624	0.02116	Down
Tbc1d9b	Astrocyte	1	0.7182	1.409e-05	0.0008875	Up	0.644	0.0006699	0.0196	Up	-0.1049	0.3043	0.7626	None
Tcf25	Astrocyte	1	0.7922	7.322e-08	9.372e-06	Up	1.028	9.021e-13	3.214e-10	Up	0.2854	0.1419	0.5946	None
Tead1	Astrocyte	1	0.5096	0.006179	0.09314	None	0.7648	6.579e-07	6.269e-05	Up	0.2284	0.04441	0.3709	None
Tef	Astrocyte	0	0.3731	0.001279	0.03307	Up	0.4513	0.01141	0.1385	None	0.04952	0.5849	0.9161	None
Tenm4	Astrocyte	1	-1.741	7.819e-28	1.526e-24	Down	-0.7712	2.505e-05	0.001435	Down	0.8876	9.736e-13	5.817e-10	Up
Tesk2	Astrocyte	0	0.3714	0.006559	0.09608	None	0.5433	0.001021	0.02717	Up	0.2261	0.3813	0.819	None
Thap2	Astrocyte	0	0.4762	0.002104	0.04667	Up	0.1419	0.439	0.7989	None	-0.3293	0.04733	0.3798	None
Them4	Astrocyte	1	-0.5298	0.001625	0.03904	Down	-0.5746	0.001076	0.02782	Down	-0.04717	0.9351	0.9881	None
Tiparp	Astrocyte	1	0.6487	3.294e-05	0.001864	Up	0.4482	0.01873	0.1933	None	-0.2711	0.08647	0.4899	None
Tlk1	Astrocyte	1	0.1373	0.006036	0.09192	None	0.2778	0.00162	0.03617	Up	0.1712	0.456	0.8634	None
Tmem117	Astrocyte	1	-0.4546	0.001479	0.03678	Down	-0.01382	0.03381	0.2657	None	0.4519	0.0002549	0.01654	Up
Tmem184b	Astrocyte	1	-0.04913	0.8041	0.9245	None	0.2622	0.01786	0.1877	None	0.3017	0.0007804	0.03472	Up
Tmem44	Astrocyte	1	-0.4553	0.0003244	0.01166	Down	-0.8036	1.168e-10	2.455e-08	Down	-0.3077	0.002489	0.07796	None
Tnik	Astrocyte	1	-0.1212	0.02221	0.2023	None	-0.1663	3.667e-05	0.001938	Down	-0.05425	0.2616	0.7351	None
Tom1l2	Astrocyte	1	-0.3734	0.0471	0.2916	None	-0.3799	0.001038	0.0272	Down	0.008091	0.26	0.7345	None
Tomm40	Astrocyte	0	-0.2799	0.131	0.4682	None	-0.5308	0.0008252	0.02331	Down	-0.2002	0.1237	0.5656	None
Tox	Astrocyte	1	0.7079	0.0007183	0.02157	Up	0.5035	0.03165	0.2574	None	-0.1939	0.2461	0.7206	None
Tpd52l1	Astrocyte	1	0.04348	0.003399	0.06365	None	0.4563	7.008e-06	0.0004993	Up	0.4084	0.04472	0.3711	None
Tpmt	Astrocyte	1	0.494	0.0003325	0.0118	Up	0.1974	0.05968	0.3645	None	-0.3132	0.03643	0.3413	None
Tprkb	Astrocyte	1	-0.666	3.334e-05	0.001873	Down	-1.164	4.127e-15	2.114e-12	Down	-0.5567	8.814e-05	0.00778	Down
Trf	Astrocyte	1	0.8731	7.807e-09	1.27e-06	Up	0.8002	2.192e-07	2.46e-05	Up	-0.03629	0.9259	0.9873	None
Trib2	Astrocyte	1	-0.3586	0.0003488	0.01227	Down	-0.5183	4.258e-05	0.002181	Down	-0.06448	0.3968	0.8295	None
Trim9	Astrocyte	1	-0.5753	0.004985	0.08193	None	-1.159	1.894e-10	3.785e-08	Down	-0.6136	0.0002019	0.01388	Down
Trio	Astrocyte	1	-0.9747	1.175e-06	0.0001008	Down	-0.4674	0.049	0.3243	None	0.4637	0.02287	0.2758	None
Trmt1	Astrocyte	1	0.4464	0.001337	0.03423	Up	0.09232	0.7059	0.9203	None	-0.3375	0.01547	0.221	None
Trmt13	Astrocyte	1	0.2087	0.0005788	0.01808	Up	0.2014	0.008274	0.1141	None	-0.02525	0.6488	0.9359	None
Trpm3	Astrocyte	1	-0.01345	0.7425	0.8993	None	-0.2209	2.231e-05	0.001297	Down	-0.2065	5.553e-06	0.0007987	Down
Trps1	Astrocyte	1	0.2424	0.007335	0.1032	None	-0.1599	0.1723	0.5928	None	-0.4351	2.208e-07	4.9e-05	Down
Tsc22d3	Astrocyte	1	0.8674	3.679e-06	0.0002873	Up	0.7486	0.0001162	0.005145	Up	-0.1725	0.5599	0.9064	None
Tspan32	Astrocyte	1	-0.2623	0.009088	0.1186	None	-0.3517	8.513e-05	0.003986	Down				None
Tspan7	Astrocyte	1	0.2637	0.09226	0.3994	None	0.4224	0.0005839	0.01777	Up	0.1504	0.1881	0.6608	None
Tspan9	Astrocyte	1	-0.5968	0.0005374	0.01699	Down	-0.88	3.387e-07	3.513e-05	Down	-0.3121	0.06761	0.4453	None
Tspyl4	Astrocyte	0	0.1409	0.3653	0.6941	None	-0.1728	0.1687	0.5876	None	-0.3389	0.0006085	0.02991	Down
Ttc19	Astrocyte	1	0.4446	0.004878	0.08072	None	0.6071	0.001614	0.03617	Up	0.156	0.5461	0.9034	None
Ttc4	Astrocyte	0	0.2593	0.1998	0.5579	None	-0.2594	0.2249	0.6434	None	-0.5448	0.0002735	0.01727	Down
Ttr	Astrocyte	0	-1.417	2.409e-72	9.406e-69	Down	-1.478	6.817e-71	2.793e-67	Down				None
Ttyh1	Astrocyte	1	0.001301	0.6839	0.8749	None	-0.2458	0.01098	0.1357	None	-0.2745	0.0006772	0.03207	Down
Ubb	Astrocyte	1	1.153	1.799e-10	3.696e-08	Up	0.2495	0.2491	0.6709	None	-0.8957	2.558e-07	5.519e-05	Down
Ube2e1	Astrocyte	0	0.2965	0.0677	0.3438	None	0.4941	0.001168	0.02917	Up	0.201	0.3033	0.7625	None
Ube2g1	Astrocyte	1	0.3301	0.05632	0.3142	None	0.5586	0.0008469	0.02377	Up	0.2048	0.01716	0.2375	None
Ubr2	Astrocyte	1	0.3921	0.001107	0.02982	Up	0.5214	0.002938	0.05634	None	0.1345	0.256	0.7308	None
Unc13c	Astrocyte	1	0.309	0.04091	0.2737	None	0.9269	1.832e-09	2.992e-07	Up	0.5793	3.062e-05	0.003398	Up
Unc80	Astrocyte	0	-0.1888	0.1126	0.4409	None	-0.3504	0.001226	0.03026	Down	-0.151	0.1291	0.5732	None
Usp19	Astrocyte	1	-0.4283	0.006781	0.09769	None	-0.6071	0.0004354	0.0141	Down	-0.1793	0.02222	0.271	None
Usp53	Astrocyte	1	1.222	4.275e-37	1.113e-33	Up	0.8247	2.204e-20	2.007e-17	Up	-0.2942	0.004194	0.1055	None
Usp54	Astrocyte	1	0.8827	3.398e-08	4.913e-06	Up	1.138	1.136e-10	2.455e-08	Up	0.1071	0.8169	0.9712	None
Ust	Astrocyte	1	-0.3454	0.00124	0.03239	Down	-0.04813	0.8644	0.9619	None	0.2896	0.003369	0.09515	None
Utp11	Astrocyte	0	-0.4001	0.001975	0.04496	Down	-0.2542	0.1103	0.4866	None	0.1259	0.3533	0.8018	None
Utp14b	Astrocyte	1	0.1487	0.432	0.737	None	-0.6722	0.002889	0.05556	None	-0.7838	3.499e-05	0.003723	Down
Utrn	Astrocyte	1	0.258	0.1046	0.4256	None	0.5855	0.0001669	0.006942	Up	0.334	0.08567	0.4895	None
Uty	Astrocyte	1	0.3645	0.003121	0.06046	None	-0.0878	0.5585	0.86	None	-0.4879	4.606e-06	0.000675	Down
Vegfa	Astrocyte	1	-0.4572	0.01043	0.1291	None	-0.7046	2.442e-05	0.001409	Down	-0.218	0.3249	0.7788	None
Vps13a	Astrocyte	1	0.09802	0.2421	0.5995	None	0.5619	2.196e-05	0.001287	Up	0.4089	0.003645	0.09662	None
Vps28	Astrocyte	0	0.1555	0.1627	0.5116	None	-0.1128	0.3511	0.7486	None	-0.2719	0.0009732	0.04131	Down
Vstm4	Astrocyte	1	-0.8035	2.635e-07	2.982e-05	Down	-1.162	5.318e-13	2.179e-10	Down	-0.353	0.06294	0.4292	None
Wdpcp	Astrocyte	1	0.6512	0.0001311	0.00575	Up	0.0595	0.1825	0.6011	None	-0.6389	2.037e-05	0.002397	Down
Wdr17	Astrocyte	1	-0.8883	1.012e-21	8.778e-19	Down	-0.3509	7.228e-11	1.742e-08	Down	0.5147	0.001112	0.04522	Up
Wnk2	Astrocyte	1	-0.5158	3.42e-05	0.001894	Down	-0.1152	0.1114	0.4882	None	0.4051	0.006212	0.1304	None
Wwox	Astrocyte	1	-0.1569	0.6764	0.8696	None	0.5475	0.005538	0.08576	None	0.6971	0.0002155	0.01468	Up
Xylt1	Astrocyte	1	-0.4335	0.002686	0.05491	None	0.00108	0.973	0.991	None	0.4586	0.000158	0.01171	Up
Ypel3	Astrocyte	1	-0.09052	0.3857	0.7068	None	-0.5483	0.0001596	0.006715	Down	-0.4453	0.0002794	0.01736	Down
Ywhaz	Astrocyte	0	0.3313	0.0022	0.04759	Up	0.09623	0.6053	0.8805	None	-0.2099	0.05674	0.4169	None
Zbtb16	Astrocyte	1	0.1084	0.6198	0.8433	None	0.5565	0.0003117	0.01073	Up	0.4204	0.007068	0.143	None
Zc3h7a	Astrocyte	1	-0.164	0.1117	0.4387	None	-0.4053	0.0005106	0.01613	Down	-0.1997	0.08955	0.4984	None
Zdhhc17	Astrocyte	0	-0.2954	0.1101	0.437	None	-0.5408	0.001176	0.02919	Down	-0.1865	0.3208	0.7761	None
Zfhx3	Astrocyte	1	1.95	5.18e-26	6.741e-23	Up	1.203	1.888e-09	2.992e-07	Up	-0.7109	8.61e-06	0.001194	Down
Zfp219	Astrocyte	1	-0.3541	0.0009704	0.02696	Down	-0.07952	0.7307	0.927	None	0.3203	0.001105	0.04516	Up
Zfp266	Astrocyte	0	0.03874	0.1134	0.4422	None	0.2555	0.001035	0.0272	Up	0.2064	0.1106	0.5469	None
Zfp329	Astrocyte	1	0.4447	0.001228	0.03216	Up	-0.04018	0.1347	0.5325	None	-0.4165	0.01047	0.1761	None
Zfp36l1	Astrocyte	0	-0.5297	0.001361	0.0347	Down	-0.222	0.3629	0.7552	None	0.2522	0.133	0.5802	None
Zfp36l2	Astrocyte	0	-0.2424	0.0818	0.3804	None	-0.432	0.001138	0.02864	Down	-0.1697	0.2424	0.718	None
Zfp438	Astrocyte	0	0.1344	0.001962	0.04479	Up	0.09177	0.03132	0.2564	None	-0.04149	0.682	0.9428	None
Zfp641	Astrocyte	1	0.3218	0.04725	0.2916	None	0.6091	0.0006573	0.01944	Up	0.3155	0.008832	0.1633	None
Zfp692	Astrocyte	1	-0.05851	0.4093	0.7218	None	-0.4484	0.007466	0.1062	None	-0.3924	0.0007823	0.03472	Down
Zfp982	Astrocyte	1	0.325	1.405e-05	0.0008875	Up	0.2098	0.008683	0.1174	None	-0.1517	0.1302	0.5752	None
Zmym2	Astrocyte	1	0.207	0.2748	0.6252	None	0.6194	0.0002962	0.01046	Up	0.3695	0.02789	0.3028	None
Zmym5	Astrocyte	0	-0.4795	0.0008277	0.02421	Down	-0.1931	0.4396	0.7994	None	0.2657	0.02914	0.309	None
Zswim5	Astrocyte	1	-0.5325	0.005025	0.08225	None	0.09008	0.2856	0.6981	None	0.643	1.333e-05	0.001697	Up
mt-Atp6	Astrocyte	1	0.9736	8.081e-08	9.859e-06	Up	0.6918	0.0001933	0.007616	Up	-0.2204	0.4039	0.8331	None
mt-Co1	Astrocyte	1	0.78	3.234e-05	0.001843	Up	0.4027	0.06903	0.3919	None	-0.4126	0.04077	0.3566	None
mt-Co2	Astrocyte	1	0.7077	2.295e-05	0.001379	Up	0.2678	0.05675	0.3544	None	-0.3964	0.04134	0.3598	None
mt-Co3	Astrocyte	1	1.195	3.86e-10	7.728e-08	Up	0.6073	0.001843	0.03975	Up	-0.5733	0.001621	0.05711	None
mt-Cytb	Astrocyte	1	0.8133	5.31e-07	5.106e-05	Up	0.5852	0.0007299	0.02099	Up	-0.2122	0.278	0.75	None
mt-Nd1	Astrocyte	0	0.4419	0.001605	0.03879	Up	0.4079	0.004112	0.06976	None	-0.00972	0.9083	0.9846	None
mt-Nd2	Astrocyte	1	0.54	0.0002676	0.01001	Up	0.2994	0.1043	0.4781	None	-0.2613	0.02272	0.2749	None
mt-Nd4	Astrocyte	1	0.5822	0.0002522	0.0097	Up	0.2361	0.1854	0.6054	None	-0.3301	0.05638	0.4169	None
Ciart	Astrocyte	1				None	0.3003	0.000366	0.01219	Up	0.08692	0.1987	0.674	None
Pus7	Astrocyte	0				None	0.09545	0.4614	0.81	None	0.2304	0.0008133	0.03589	Up
Slc24a2	Astrocyte	1				None	0.3658	5.392e-05	0.002727	Up	0.2031	0.03524	0.3371	None
0610043K17Rik	Oligodendrocyte	1	0.09646	0.01868	0.09374	None	0.199	0.001441	0.01052	Up	0.09481	0.1849	0.4732	None
1700025G04Rik	Oligodendrocyte	1	0.2355	0.04698	0.1651	None	-0.06501	0.8269	0.8743	None	-0.2875	0.006163	0.04372	Down
1700028E10Rik	Oligodendrocyte	1	0.1696	0.003756	0.0304	Up	0.2287	6.493e-06	0.0001036	Up	0.04085	0.1793	0.4653	None
1700042O10Rik	Oligodendrocyte	1	0.1932	0.008203	0.05307	None	0.5402	1.034e-13	4.446e-12	Up	0.3535	1.852e-08	5.94e-07	Up
1700047M11Rik	Oligodendrocyte	1	-0.6455	1.927e-06	5.266e-05	Down	0.06398	0.04699	0.1377	None	0.6912	7.5e-13	4.834e-11	Up
1700063D05Rik	Oligodendrocyte	1	0.283	7.415e-05	0.001277	Up	-0.1576	0.04309	0.1309	None	-0.4022	1.046e-08	3.506e-07	Down
1700085D07Rik	Oligodendrocyte	1	-0.6007	2.524e-06	6.762e-05	Down	-0.3315	0.01529	0.06395	None	0.258	0.03071	0.1512	None
1700111E14Rik	Oligodendrocyte	1	-0.3674	0.0002945	0.004284	Down	-0.5931	8.142e-07	1.551e-05	Down	-0.2159	0.1113	0.3508	None
1810013L24Rik	Oligodendrocyte	1	0.06532	0.1769	0.3569	None	0.2356	0.002806	0.01795	Up	0.1711	0.05262	0.2197	None
1810037I17Rik	Oligodendrocyte	1	0.06409	0.1487	0.3239	None	-0.09988	0.2182	0.3719	None	-0.1433	0.005111	0.03809	Down
1810062O18Rik	Oligodendrocyte	1	-0.6383	2.959e-07	9.569e-06	Down	0.05135	0.1295	0.2699	None	0.6859	6.122e-11	3.211e-09	Up
2210408F21Rik	Oligodendrocyte	1	0.02203	0.8326	0.8884	None	-0.1638	0.004314	0.02519	Down	-0.1597	0.0003421	0.004026	Down
2210408I21Rik	Oligodendrocyte	1	0.08233	0.6867	0.7899	None	0.736	7.811e-13	3.042e-11	Up	0.585	5.401e-12	3.151e-10	Up
2510009E07Rik	Oligodendrocyte	1	-0.1679	0.00617	0.04284	Down	-0.1593	0.02278	0.08529	None	0.03218	0.7544	0.9091	None
2610035D17Rik	Oligodendrocyte	1	-0.1586	0.05203	0.1749	None	-0.8274	7.214e-10	2.128e-08	Down	-0.6942	3.098e-10	1.476e-08	Down
2610044O15Rik8	Oligodendrocyte	1	0.08414	0.02129	0.1018	None	0.1226	0.005577	0.03069	Up	0.04264	0.5425	0.7977	None
2810410L24Rik	Oligodendrocyte	1	-0.1853	0.0314	0.1311	None	-0.2744	0.0008858	0.007096	Down	-0.06371	0.5262	0.7854	None
3110021N24Rik	Oligodendrocyte	1	0.1638	0.3803	0.5599	None	0.6913	4.225e-08	9.765e-07	Up	0.5398	3.792e-07	8.61e-06	Up
3300002A11Rik	Oligodendrocyte	1	-0.162	0.01297	0.0724	None	0.1239	0.1184	0.2563	None	0.2829	6.111e-08	1.688e-06	Up
3300002I08Rik	Oligodendrocyte	1	0.1486	0.0214	0.1022	None	-0.0002972	0.1457	0.291	None	-0.1447	0.001331	0.01289	Down
4833420G17Rik	Oligodendrocyte	0	0.2092	0.01729	0.08901	None	0.2253	0.005743	0.03134	Up	0.00879	0.9301	0.9761	None
4921511C10Rik	Oligodendrocyte	0	0.04167	0.7854	0.8572	None	0.1886	0.009263	0.04473	Up	0.1316	0.0435	0.1933	None
4930402H24Rik	Oligodendrocyte	0	-0.4056	0.007228	0.0483	Down	-0.1459	0.3767	0.5237	None	0.2368	0.07216	0.2699	None
4930419G24Rik	Oligodendrocyte	1	-0.5745	2.589e-28	7.599e-26	Down	-0.6416	7.521e-21	6.312e-19	Down	-0.1234	0.007006	0.04863	Down
4930420G21Rik	Oligodendrocyte	1	0.4611	3.347e-05	0.0006685	Up	-0.357	0.008637	0.04249	Down	-0.7768	1.909e-16	1.9e-14	Down
4930445B16Rik	Oligodendrocyte	0	-0.05054	0.4124	0.5839	None	0.1423	0.1378	0.2822	None	0.1818	0.004492	0.03451	Up
4930511M06Rik	Oligodendrocyte	1	0.2991	0.001696	0.01664	Up	0.8755	1.916e-17	1.262e-15	Up	0.5949	6.013e-09	2.119e-07	Up
4930512B01Rik	Oligodendrocyte	1	-0.4777	6.794e-05	0.001185	Down	-0.3695	0.001777	0.01248	Down	0.1561	0.1229	0.3728	None
4930532I03Rik	Oligodendrocyte	0	-0.07407	0.2686	0.4562	None	-0.1734	0.001542	0.01108	Down				None
4930549C15Rik	Oligodendrocyte	1	-0.217	0.0538	0.1784	None	-0.3892	6.046e-05	0.0007463	Down	-0.1958	0.02242	0.12	None
4930557K07Rik	Oligodendrocyte	1	-0.1255	0.1388	0.3118	None	0.07743	0.1761	0.3273	None	0.2048	0.001503	0.0142	Up
4930593A02Rik	Oligodendrocyte	1	-0.1415	0.2284	0.4146	None	-0.3281	0.0006859	0.005762	Down	-0.1528	0.05415	0.2237	None
4931406P16Rik	Oligodendrocyte	1	0.2649	0.005764	0.04109	Up	0.2988	0.005321	0.02968	Up	0.07518	0.622	0.844	None
4932443L11Rik	Oligodendrocyte	1	-0.3507	0.01957	0.09636	None	-0.09905	0.02143	0.08187	None	0.2508	0.001066	0.01073	Up
4933400F21Rik	Oligodendrocyte	1	-0.4149	1.522e-05	0.000338	Down	0.1393	0.3016	0.4571	None	0.5525	2.37e-12	1.458e-10	Up
4933431E20Rik	Oligodendrocyte	1	-0.0002998	0.1804	0.3615	None	-0.2633	0.002079	0.01409	Down	-0.272	0.0008714	0.009031	Down
4933434E20Rik	Oligodendrocyte	0	0.08067	0.2869	0.4742	None	0.1916	0.006545	0.03466	Up	0.09332	0.34	0.6476	None
5031439G07Rik	Oligodendrocyte	1	-0.3575	0.02	0.09736	None	0.1917	0.07435	0.1894	None	0.5346	5.122e-07	1.144e-05	Up
5330434G04Rik	Oligodendrocyte	1	-0.06544	0.4417	0.6062	None	-0.3826	0.002022	0.01389	Down	-0.3272	0.0008182	0.008531	Down
5830418P13Rik	Oligodendrocyte	1	-0.005003	0.8828	0.9226	None	-0.1706	0.004424	0.02571	Down	-0.1517	0.004961	0.03738	Down
6030407O03Rik	Oligodendrocyte	1	0.1293	0.002843	0.02473	Up	0.05214	0.09788	0.227	None	-0.08408	0.2231	0.524	None
9130019P16Rik	Oligodendrocyte	1	-0.478	0.0001075	0.001785	Down	-0.5987	3.817e-07	7.622e-06	Down	-0.113	0.1431	0.4075	None
9330111N05Rik	Oligodendrocyte	1	0.08595	0.3865	0.5644	None	0.3166	4.687e-05	0.0005985	Up	0.2279	0.001762	0.0162	Up
9330117O12Rik	Oligodendrocyte	1	-0.1937	0.1418	0.3156	None	-0.7337	3.526e-10	1.071e-08	Down	-0.5106	1.947e-09	7.529e-08	Down
9330159F19Rik	Oligodendrocyte	1	0.9054	7.239e-15	7.517e-13	Up	0.3926	0.0001062	0.001192	Up	-0.5092	3.089e-06	5.956e-05	Down
9330182L06Rik	Oligodendrocyte	1	0.3225	0.03848	0.1471	None	-1.033	1.045e-16	6.407e-15	Down	-1.332	9.272e-37	3.921e-34	Down
9330199G10Rik	Oligodendrocyte	1	0.3387	5.035e-06	0.0001249	Up	0.41	6.1e-07	1.194e-05	Up	0.03378	0.7966	0.9261	None
9530034E10Rik	Oligodendrocyte	1	-0.09879	0.2053	0.39	None	0.1592	0.04032	0.1253	None	0.256	5.023e-06	9.415e-05	Up
9530059O14Rik	Oligodendrocyte	1	0.04784	0.01619	0.0845	None	-0.387	0.0008002	0.006559	Down	-0.4259	2.143e-07	5.273e-06	Down
9530068E07Rik	Oligodendrocyte	1	0.08512	0.259	0.4478	None	-0.05392	0.1371	0.2813	None	-0.1387	0.001841	0.01679	Down
9530077C05Rik	Oligodendrocyte	1	0.3144	1.568e-06	4.356e-05	Up	0.4168	1.178e-09	3.404e-08	Up	0.1073	0.185	0.4732	None
9630041A04Rik	Oligodendrocyte	1	-0.1374	0.005414	0.03958	Down	0.08151	0.1386	0.2831	None	0.2204	2.016e-06	4.001e-05	Up
A330015K06Rik	Oligodendrocyte	1	1.571	6.554e-39	2.458e-36	Up	1.704	5.095e-41	1.088e-38	Up	0.168	0.03747	0.1741	None
A330049N07Rik	Oligodendrocyte	1	0.2371	0.01332	0.07362	None	-0.1541	0.455	0.5893	None	-0.4516	1.503e-06	3.1e-05	Down
A430106G13Rik	Oligodendrocyte	1	-0.1539	0.09599	0.2518	None	-0.3053	8.122e-05	0.0009671	Down	-0.1337	0.05915	0.2381	None
AC149090.1	Oligodendrocyte	1	-0.6742	2.99e-08	1.201e-06	Down	0.8059	6.672e-13	2.613e-11	Up	1.424	8.638e-48	5.845e-45	Up
AY036118	Oligodendrocyte	1	1.499	6.377e-46	5.381e-43	Up	1.247	7.109e-33	1.114e-30	Up	-0.2198	0.005014	0.03773	Down
Aar2	Oligodendrocyte	1	0.2871	3.823e-07	1.217e-05	Up	0.1194	0.02139	0.08187	None	-0.1738	0.002477	0.02138	Down
Aars	Oligodendrocyte	1	-0.1885	0.001044	0.01148	Down	-0.1348	0.05187	0.1476	None	0.05007	0.3532	0.6592	None
Abca1	Oligodendrocyte	1	-0.02061	0.1674	0.3466	None	0.2846	0.0005278	0.004625	Up	0.2871	0.00032	0.003806	Up
Abca2	Oligodendrocyte	1	-0.3095	0.005185	0.0385	Down	0.3884	6.068e-06	9.699e-05	Up	0.6988	1.119e-10	5.735e-09	Up
Abca6	Oligodendrocyte	1	0.008489	0.6644	0.7758	None	-0.1723	0.0185	0.07359	None	-0.1793	0.001185	0.01161	Down
Abca8b	Oligodendrocyte	1	-0.04405	0.2995	0.486	None	0.3316	0.0001253	0.001387	Up	0.3793	6.377e-07	1.397e-05	Up
Abcb7	Oligodendrocyte	1	-0.1446	0.1187	0.2828	None	-0.3163	0.0002883	0.002854	Down	-0.1439	0.09671	0.3224	None
Abcb8	Oligodendrocyte	1	0.032	0.3107	0.4965	None	0.1991	0.003622	0.02195	Up	0.1812	0.01386	0.08321	None
Abcc5	Oligodendrocyte	1	0.1181	3.963e-05	0.0007687	Up	-0.4365	0.002035	0.01395	Down	-0.5402	2.303e-08	7.053e-07	Down
Abcd3	Oligodendrocyte	1	0.02466	0.4913	0.6482	None	-0.1933	0.0152	0.06372	None	-0.207	0.002042	0.01828	Down
Abhd12	Oligodendrocyte	0	0.1489	0.2887	0.4755	None	-0.1153	0.301	0.4567	None	-0.277	0.005203	0.03858	Down
Abhd17b	Oligodendrocyte	1	0.4109	5.353e-10	3.036e-08	Up	0.06327	0.2201	0.3739	None	-0.3443	1.346e-08	4.442e-07	Down
Abl1	Oligodendrocyte	1	-0.1292	0.5624	0.7011	None	0.3194	0.0003695	0.003505	Up	0.4567	9.782e-08	2.627e-06	Up
Abl2	Oligodendrocyte	1	-0.1918	0.0446	0.1607	None	0.02591	0.106	0.2397	None	0.1905	0.007266	0.0499	Up
Ablim2	Oligodendrocyte	1	-0.6377	1.86e-09	9.658e-08	Down	-0.1363	0.3375	0.4898	None	0.5068	1.001e-08	3.369e-07	Up
Abtb2	Oligodendrocyte	1	0.2566	0.05535	0.1811	None	-0.03686	0.1319	0.2738	None	-0.3224	0.001485	0.01407	Down
Acaa1a	Oligodendrocyte	1	-0.1741	0.00362	0.02951	Down	-0.1711	0.02571	0.09307	None	0.0139	0.491	0.7628	None
Acaca	Oligodendrocyte	1	0.7676	6.002e-28	1.688e-25	Up	1.027	2.302e-51	9.014e-49	Up	0.2898	4.201e-05	0.000629	Up
Acap2	Oligodendrocyte	1	0.681	5.671e-08	2.139e-06	Up	0.2287	0.06664	0.1761	None	-0.4239	0.000123	0.001651	Down
Acin1	Oligodendrocyte	1	0.0939	5.32e-05	0.0009653	None	-0.287	0.0008743	0.007035	Down	-0.3763	0.0002658	0.003264	Down
Aco2	Oligodendrocyte	1	0.0906	0.01651	0.08587	None	0.1776	0.006453	0.03433	Up	0.09732	0.4043	0.7028	None
Actg1	Oligodendrocyte	1	-0.1522	0.009239	0.05733	None	-0.186	0.000876	0.007041	Down	-0.05046	0.718	0.892	None
Actn1	Oligodendrocyte	1	0.02586	0.2801	0.4682	None	0.1866	0.00314	0.01966	Up	0.1466	0.008155	0.05464	None
Acyp2	Oligodendrocyte	1	-0.073	0.4409	0.6054	None	-0.6646	5.033e-07	9.882e-06	Down	-0.5755	4.149e-08	1.18e-06	Down
Adam10	Oligodendrocyte	1	0.2248	0.1296	0.2977	None	-0.1116	0.4968	0.6232	None	-0.374	0.001317	0.01281	Down
Adam15	Oligodendrocyte	1	0.091	0.1744	0.3544	None	0.1868	0.001656	0.01175	Up	0.1189	0.06898	0.2622	None
Adam19	Oligodendrocyte	1	0.1602	0.1536	0.3285	None	-0.5585	3.039e-06	5.113e-05	Down	-0.7013	2.431e-12	1.482e-10	Down
Adam9	Oligodendrocyte	1	0.0794	0.0106	0.0628	None	0.1697	0.001595	0.01141	Up	0.07971	0.4241	0.7177	None
Adamts2	Oligodendrocyte	1	-0.2637	0.0009264	0.01058	Down	0.1601	0.006805	0.03551	Up	0.4524	1.344e-12	8.423e-11	Up
Adamts4	Oligodendrocyte	1	-0.5148	1.692e-08	7.321e-07	Down	-0.12	0.02199	0.08309	None	0.4302	1.603e-07	4.061e-06	Up
Adamtsl1	Oligodendrocyte	1	-0.01896	0.01543	0.08154	None	-0.4499	0.0004509	0.004096	Down	-0.4112	1.14e-05	0.0001978	Down
Adamtsl4	Oligodendrocyte	1	0.2749	0.04762	0.1663	None	0.5219	4.866e-06	7.977e-05	Up	0.2751	0.003192	0.02615	Up
Adap1	Oligodendrocyte	1	-0.4256	0.002319	0.02101	Down	-0.1902	0.09995	0.2309	None	0.2059	0.1442	0.4096	None
Adcy5	Oligodendrocyte	1	-0.2052	0.0447	0.1607	None	0.3489	2.565e-06	4.42e-05	Up	0.5643	3.973e-13	2.716e-11	Up
Adcy9	Oligodendrocyte	1	-0.2718	0.0009149	0.01048	Down	-0.02184	0.09652	0.2251	None	0.2417	0.001421	0.0136	Up
Add3	Oligodendrocyte	0	-0.191	0.004411	0.03418	Down	-0.1213	0.08045	0.2001	None	0.03216	0.6398	0.8555	None
Adgrb3	Oligodendrocyte	1	0.4105	0.003156	0.0268	Up	-0.09968	0.08641	0.209	None	-0.5072	5.426e-09	1.923e-07	Down
Adgrv1	Oligodendrocyte	1	0.1041	0.4033	0.5775	None	0.4142	1.08e-06	2.004e-05	Up	0.2796	8.16e-05	0.001151	Up
Adipor2	Oligodendrocyte	1	1.142	9.206e-60	1.243e-56	Up	1.02	8.059e-55	4.058e-52	Up	-0.08239	0.181	0.4671	None
Adk	Oligodendrocyte	1	0.2637	0.009766	0.05947	None	0.3123	0.004914	0.02793	Up	0.03745	0.8161	0.9304	None
Afdn	Oligodendrocyte	1	-0.3386	0.01958	0.09636	None	-0.6512	6.311e-07	1.232e-05	Down	-0.3163	0.002554	0.02189	Down
Aff1	Oligodendrocyte	1	0.5924	4.292e-13	3.491e-11	Up	1.295	1.502e-45	4.072e-43	Up	0.6454	2.531e-14	1.946e-12	Up
Agap1	Oligodendrocyte	1	-0.3009	0.0002965	0.004305	Down	0.5496	3.31e-15	1.666e-13	Up	0.8724	1.739e-45	9.807e-43	Up
Agmo	Oligodendrocyte	1	0.7787	1.695e-09	8.94e-08	Up	0.2809	0.02767	0.09788	None	-0.5069	1.793e-05	0.0002959	Down
Ago3	Oligodendrocyte	1	0.3307	0.001226	0.01304	Up	0.1903	0.01634	0.06729	None	-0.1094	0.4806	0.7583	None
Agpat4	Oligodendrocyte	1	0.1361	0.00978	0.05947	None	-0.1977	0.1838	0.3363	None	-0.2721	0.002994	0.02483	Down
Ahctf1	Oligodendrocyte	1	-0.0415	0.5225	0.6718	None	0.1557	0.002059	0.01406	Up	0.1679	0.02036	0.1111	None
Ahi1	Oligodendrocyte	1	0.3604	0.0005516	0.007065	Up	0.01828	0.1976	0.3508	None	-0.3673	0.0001306	0.00175	Down
Ahsa1	Oligodendrocyte	1	0.3832	8.659e-08	3.142e-06	Up	0.2305	0.0004154	0.003843	Up	-0.1648	0.04313	0.192	None
Ak3	Oligodendrocyte	1	0.2342	1.511e-05	0.0003366	Up	0.5318	3.478e-10	1.061e-08	Up	0.2733	0.01269	0.0775	None
Akap11	Oligodendrocyte	1	0.2667	0.0008971	0.01032	Up	0.2292	0.005581	0.03069	Up	-0.03231	0.6196	0.8425	None
Akap7	Oligodendrocyte	1	-0.2313	0.002165	0.02002	Down	-0.1167	0.1494	0.2954	None	0.1033	0.1156	0.359	None
Akap8l	Oligodendrocyte	1	0.08308	0.1196	0.2841	None	-0.3968	0.004791	0.02735	Down	-0.4736	4.12e-05	0.0006182	Down
Akap9	Oligodendrocyte	1	0.1349	4.987e-05	0.0009147	Up	0.2196	5.859e-06	9.412e-05	Up	0.1085	0.5974	0.8299	None
Akr1b3	Oligodendrocyte	1	0.1195	0.4622	0.6224	None	0.6278	1.263e-08	3.157e-07	Up	0.5341	1.974e-08	6.301e-07	Up
Alcam	Oligodendrocyte	0	-0.0586	0.8309	0.8873	None	0.2055	0.0867	0.2095	None	0.2827	0.004394	0.03387	Up
Aldh1l2	Oligodendrocyte	1	-0.105	0.0769	0.2203	None	-0.2486	1.952e-06	3.449e-05	Down	-0.1122	0.00724	0.04979	Down
Aldh7a1	Oligodendrocyte	1	0.04726	0.142	0.3158	None	-0.09944	0.03774	0.1195	None	-0.1511	0.001786	0.01638	Down
Aldoa	Oligodendrocyte	1	0.1811	0.09438	0.249	None	-0.284	0.001938	0.01343	Down	-0.4487	3.445e-09	1.26e-07	Down
Aldoc	Oligodendrocyte	1	0.09886	0.2679	0.4559	None	-0.1211	0.01535	0.06406	None	-0.2419	0.0001714	0.002239	Down
Alg14	Oligodendrocyte	1	-0.1294	0.001288	0.01359	Down	-0.0559	0.2045	0.3574	None	0.09436	0.03563	0.168	None
Alk	Oligodendrocyte	1	-0.2431	0.0002347	0.003552	Down	-0.2994	2.712e-05	0.0003662	Down	-0.03308	0.2255	0.526	None
Alkbh1	Oligodendrocyte	1	0.2613	0.003053	0.02605	Up	-0.07547	0.2797	0.438	None	-0.3038	0.0002444	0.003023	Down
Amer2	Oligodendrocyte	1	0.3615	1.536e-06	4.303e-05	Up	0.2509	0.0003758	0.00356	Up	-0.1191	0.2248	0.5258	None
Amotl2	Oligodendrocyte	1	-0.1616	0.01586	0.08343	None	-0.01702	0.1651	0.3143	None	0.1647	0.005986	0.04277	Up
Amph	Oligodendrocyte	1	-0.1659	0.116	0.2787	None	-0.421	0.0007136	0.005967	Down	-0.2654	0.0002935	0.003547	Down
Anapc11	Oligodendrocyte	1	0.2374	0.0002564	0.00383	Up	0.1288	0.1821	0.3343	None	-0.1202	0.004926	0.03725	Down
Anapc16	Oligodendrocyte	1	0.2992	0.0008648	0.01003	Up	0.2634	0.0008841	0.00709	Up	-0.04888	0.7739	0.9157	None
Anapc4	Oligodendrocyte	1	0.1494	0.004655	0.03548	Up	0.06725	0.01702	0.06905	None	-0.08957	0.4241	0.7177	None
Angptl2	Oligodendrocyte	1	-0.6759	5.55e-10	3.122e-08	Down	-0.2974	0.02429	0.08936	None	0.3645	7.437e-05	0.001062	Up
Ank	Oligodendrocyte	1	-0.6295	1.176e-05	0.0002708	Down	-0.509	0.000241	0.00243	Down	0.09865	0.4958	0.766	None
Ank2	Oligodendrocyte	1	-0.1165	4.191e-05	0.0008055	Down	-0.0653	0.03359	0.1111	None	0.04602	0.06382	0.2512	None
Ank3	Oligodendrocyte	1	-0.005082	0.07219	0.2121	None	0.375	2.961e-25	3.025e-23	Up	0.4024	1.81e-27	4.374e-25	Up
Ankrd13a	Oligodendrocyte	1	0.6041	1.819e-09	9.518e-08	Up	0.9307	3.38e-18	2.359e-16	Up	0.2932	0.009319	0.06069	None
Ankrd26	Oligodendrocyte	1	-0.01616	0.6785	0.7838	None	-0.1805	0.00896	0.04358	Down	-0.1579	0.004178	0.03242	Down
Ankrd28	Oligodendrocyte	1	-0.55	2.417e-05	0.0005034	Down	-0.8048	6.948e-16	3.857e-14	Down	-0.3197	6.819e-07	1.488e-05	Down
Anks1b	Oligodendrocyte	1	-0.461	0.0004866	0.006402	Down	-1.107	5.951e-26	6.453e-24	Down	-0.6204	1.472e-13	1.06e-11	Down
Ankub1	Oligodendrocyte	1	-0.09812	0.6614	0.7739	None	-0.5687	1.772e-07	3.684e-06	Down	-0.4813	3.003e-08	8.963e-07	Down
Anln	Oligodendrocyte	1	0.203	0.0004497	0.006042	Up	-0.2196	0.1357	0.2794	None	-0.4888	1.046e-06	2.213e-05	Down
Ano4	Oligodendrocyte	1	-0.3491	0.0004413	0.005981	Down	0.4623	9.62e-05	0.001101	Up	0.8209	1.455e-20	2.188e-18	Up
Antxr1	Oligodendrocyte	1	-0.06661	0.5033	0.6576	None	0.2007	0.005612	0.03078	Up	0.2726	1.028e-06	2.182e-05	Up
Aopep	Oligodendrocyte	1	-0.2805	0.08625	0.2357	None	-0.9108	2.827e-11	9.767e-10	Down	-0.6792	3.157e-09	1.18e-07	Down
Ap2a2	Oligodendrocyte	1	0.1614	0.06434	0.1986	None	0.2749	0.001641	0.01167	Up	0.0956	0.2385	0.5423	None
Ap2b1	Oligodendrocyte	1	-0.01883	0.7476	0.8311	None	0.2032	0.003686	0.02219	Up	0.2141	0.003219	0.02629	Up
Ap3b1	Oligodendrocyte	1	0.125	0.01042	0.06224	None	0.2941	0.001188	0.009023	Up	0.1822	0.153	0.4254	None
Ap3m1	Oligodendrocyte	1	0.1912	0.004349	0.03383	Up	0.3331	0.0001304	0.001436	Up	0.1056	0.3182	0.628	None
Apbb2	Oligodendrocyte	1	0.4544	3.348e-09	1.65e-07	Up	0.6214	2.195e-27	2.667e-25	Up	0.177	5.786e-08	1.618e-06	Up
Apc	Oligodendrocyte	1	-0.4374	0.001674	0.01652	Down	-0.5359	0.0001671	0.001796	Down	-0.1285	0.03334	0.1602	None
Aplp2	Oligodendrocyte	1	0.6315	1.4e-06	4.005e-05	Up	0.6587	1.229e-07	2.632e-06	Up	0.01332	0.9904	0.9965	None
Apod	Oligodendrocyte	1	0.4022	1.892e-07	6.354e-06	Up	0.4807	1.684e-15	8.925e-14	Up	0.07003	0.04306	0.1918	None
Apoe	Oligodendrocyte	1	1.119	7.358e-19	1.104e-16	Up	0.3744	0.0001797	0.001896	Up	-0.7295	7.174e-11	3.706e-09	Down
App	Oligodendrocyte	1	-0.4622	1.839e-07	6.239e-06	Down	-0.3524	2.696e-06	4.612e-05	Down	0.07845	0.3378	0.6473	None
Appbp2	Oligodendrocyte	1	0.1392	0.08648	0.2361	None	0.4077	1.276e-05	0.0001885	Up	0.2549	0.01199	0.0741	None
Appl2	Oligodendrocyte	1	-0.3866	0.002692	0.02369	Down	-0.5653	4.611e-06	7.595e-05	Down	-0.2012	0.01322	0.07999	None
Aqr	Oligodendrocyte	1	0.1043	0.07499	0.2168	None	0.1572	0.003014	0.01901	Up	0.06329	0.4541	0.7413	None
Araf	Oligodendrocyte	1	-0.3763	0.0002361	0.003566	Down	-0.5205	1.631e-07	3.411e-06	Down	-0.1181	0.268	0.5724	None
Arel1	Oligodendrocyte	1	-0.2255	0.002077	0.01934	Down	-0.05854	0.6033	0.7081	None	0.1871	0.00279	0.02343	Up
Arf4	Oligodendrocyte	1	0.1579	0.07002	0.208	None	-0.2849	0.0008382	0.006807	Down	-0.4366	4.582e-10	2.095e-08	Down
Arfgef1	Oligodendrocyte	1	-0.1206	0.00738	0.04913	Down	-0.08776	0.0138	0.05937	None	0.02957	0.7027	0.8846	None
Arglu1	Oligodendrocyte	1	-0.2631	0.1412	0.3147	None	0.3325	0.00355	0.02172	Up	0.5836	7.419e-08	2.032e-06	Up
Arhgap21	Oligodendrocyte	1	0.1999	0.002779	0.02436	Up	0.6937	2.236e-12	8.43e-11	Up	0.5392	8.605e-07	1.849e-05	Up
Arhgap23	Oligodendrocyte	1	-0.4481	8.803e-11	5.553e-09	Down	0.07837	0.3658	0.5131	None	0.5228	1.8e-15	1.646e-13	Up
Arhgap31	Oligodendrocyte	1	0.1117	0.2142	0.3987	None	0.4497	5.378e-05	0.0006733	Up	0.3041	0.004946	0.03735	Up
Arhgap39	Oligodendrocyte	1	0.2618	0.0005546	0.00709	Up	0.7505	1.84e-12	6.972e-11	Up	0.472	5.927e-05	0.0008589	Up
Arhgap5	Oligodendrocyte	1	0.2792	0.0002004	0.003095	Up	0.03447	0.02091	0.08047	None	-0.274	0.02727	0.1387	None
Arhgef28	Oligodendrocyte	0	-0.4287	0.002107	0.01956	Down	-0.2259	0.2025	0.3557	None	0.1973	0.1413	0.404	None
Arhgef37	Oligodendrocyte	1	0.3679	5.499e-07	1.687e-05	Up	0.09267	0.07051	0.1835	None	-0.2817	0.0001783	0.002316	Down
Arid1a	Oligodendrocyte	1	0.08279	0.6445	0.7611	None	0.3308	0.001768	0.01244	Up	0.2789	0.001166	0.01148	Up
Arid1b	Oligodendrocyte	1	-0.156	0.06753	0.2034	None	0.2884	7.183e-05	0.0008685	Up	0.46	2.164e-05	0.0003521	Up
Arid4b	Oligodendrocyte	1	0.09657	0.1143	0.2762	None	0.3477	0.006578	0.03476	Up	0.2625	0.04735	0.205	None
Arid5b	Oligodendrocyte	1	1.366	1.235e-33	4.167e-31	Up	1.622	6.317e-51	2.343e-48	Up	0.2871	0.002896	0.0241	Up
Arih1	Oligodendrocyte	1	0.003627	0.04374	0.1589	None	0.2601	0.0002185	0.002232	Up	0.2378	0.05191	0.2175	None
Arl2bp	Oligodendrocyte	1	-0.124	0.05849	0.1874	None	-0.32	6.022e-05	0.0007447	Down	-0.1789	0.03955	0.1809	None
Arl4d	Oligodendrocyte	1	0.2792	1.705e-07	5.87e-06	Up	0.2452	4.481e-06	7.415e-05	Up	-0.04795	0.3942	0.6947	None
Arl6ip4	Oligodendrocyte	1	-0.1214	0.1153	0.2778	None	-0.1884	0.002405	0.0159	Down	-0.0568	0.3327	0.6423	None
Armh4	Oligodendrocyte	0	-0.09284	0.2169	0.4021	None	-0.1602	0.005963	0.03211	Down				None
Arntl	Oligodendrocyte	1	0.0276	0.8665	0.9112	None	-0.1759	0.001444	0.01053	Down	-0.1964	4.77e-06	8.966e-05	Down
Arrdc2	Oligodendrocyte	1	0.827	5.486e-14	4.794e-12	Up	1.146	1.217e-27	1.505e-25	Up	0.3034	0.0003506	0.004105	Up
Arrdc3	Oligodendrocyte	1	0.8406	3.329e-17	4.322e-15	Up	0.8071	6.852e-16	3.833e-14	Up	-0.03387	0.4829	0.7593	None
Arsg	Oligodendrocyte	1	-0.4186	0.001294	0.01363	Down	-0.2089	0.06168	0.167	None	0.176	0.2077	0.5056	None
Art3	Oligodendrocyte	1	0.1949	2.862e-06	7.576e-05	Up	0.00749	0.09819	0.2275	None	-0.1922	2.752e-07	6.534e-06	Down
Asrgl1	Oligodendrocyte	1	-0.2285	0.004349	0.03383	Down	-0.524	3.634e-09	9.853e-08	Down	-0.266	0.0002768	0.003363	Down
Asxl3	Oligodendrocyte	1	-0.231	0.08322	0.2304	None	-0.4783	1.636e-05	0.0002335	Down	-0.2451	0.0132	0.07997	None
Atat1	Oligodendrocyte	1	-0.2486	0.02213	0.1041	None	-0.5715	9.877e-10	2.865e-08	Down	-0.2814	0.0002697	0.0033	Down
Ate1	Oligodendrocyte	1	0.2975	0.005395	0.03954	Up	0.009276	0.1283	0.2687	None	-0.3075	0.002887	0.02406	Down
Atf2	Oligodendrocyte	1	-0.137	0.002548	0.0226	Down	-0.1057	0.01084	0.04996	Down	0.04797	0.8129	0.9295	None
Atf6	Oligodendrocyte	1	-0.08154	0.02026	0.09832	None	0.1517	0.1283	0.2687	None	0.2244	0.002634	0.02242	Up
Atf7ip	Oligodendrocyte	0	0.2181	0.03974	0.1506	None	0.3103	0.005557	0.0306	Up	0.1197	0.5379	0.7938	None
Atg13	Oligodendrocyte	0	0.1113	0.1258	0.2933	None	0.1657	0.004669	0.0268	Up	0.05786	0.4014	0.7003	None
Atg4c	Oligodendrocyte	1	0.1204	0.004372	0.03392	Up	-0.1124	0.6195	0.7192	None	-0.2119	8.164e-05	0.001151	Down
Atg4d	Oligodendrocyte	1	0.1028	0.005437	0.03958	Up	0.0173	0.05409	0.1522	None	-0.05808	0.3773	0.681	None
Atp11a	Oligodendrocyte	1	-0.2278	0.01093	0.06402	None	0.4347	5.661e-08	1.275e-06	Up	0.6478	1.364e-09	5.528e-08	Up
Atp11b	Oligodendrocyte	1	-0.2438	0.002053	0.01922	Down	-0.2191	0.02408	0.08873	None	0.03366	0.3825	0.6867	None
Atp1a2	Oligodendrocyte	1	0.2309	0.003498	0.02893	Up	0.03573	0.7306	0.8037	None	-0.1993	0.003028	0.02505	Down
Atp1a3	Oligodendrocyte	1	0.03168	0.7952	0.8631	None				None	-0.1898	0.0001164	0.001572	Down
Atp1b1	Oligodendrocyte	1	0.1294	0.2198	0.4047	None	-0.2399	0.004453	0.02581	Down	-0.3627	1.445e-07	3.689e-06	Down
Atp1b2	Oligodendrocyte	1	0.07204	0.3501	0.5323	None	-0.1064	0.1318	0.2737	None	-0.1831	0.0009411	0.009664	Down
Atp1b3	Oligodendrocyte	1	-0.01681	0.04437	0.1603	None	0.1895	0.001446	0.01053	Up	0.2002	0.1165	0.3608	None
Atp2c1	Oligodendrocyte	0	0.1914	0.2853	0.4726	None	-0.1091	0.2884	0.4459	None	-0.2865	0.005096	0.03809	Down
Atp5a1	Oligodendrocyte	1	0.5996	2.221e-08	9.37e-07	Up	0.4043	0.0003635	0.003462	Up	-0.1926	0.03139	0.1538	None
Atp5h	Oligodendrocyte	1	0.1938	0.06537	0.1996	None	-0.1171	0.3069	0.4617	None	-0.3188	9.392e-05	0.001289	Down
Atp5j	Oligodendrocyte	1	0.1975	0.05121	0.1733	None	-0.06156	0.6092	0.7122	None	-0.2893	7.638e-05	0.001084	Down
Atp5o	Oligodendrocyte	1	0.2438	0.0007094	0.008581	Up	0.05261	0.1505	0.2966	None	-0.194	0.002764	0.02325	Down
Atp6v0a1	Oligodendrocyte	1	0.06001	0.008241	0.05321	None	0.2035	0.000101	0.001146	Up	0.1286	0.24	0.5438	None
Atp6v0b	Oligodendrocyte	1	0.1551	0.0001317	0.002111	Up	-0.5061	0.0002141	0.002203	Down	-0.6812	1.927e-14	1.516e-12	Down
Atp6v0c	Oligodendrocyte	1	0.1744	0.07181	0.2116	None	-0.2783	0.006507	0.03459	Down	-0.457	2.284e-05	0.0003671	Down
Atp8a1	Oligodendrocyte	1	-0.2537	0.0324	0.1335	None	0.1304	8.85e-06	0.0001365	Up	0.386	2.374e-07	5.757e-06	Up
Atxn2l	Oligodendrocyte	1	-0.2342	0.01256	0.07073	None	-0.377	2.386e-05	0.0003287	Down	-0.1174	0.1477	0.4157	None
Atxn3	Oligodendrocyte	1	-0.1127	0.04563	0.1628	None	0.06264	0.4543	0.589	None	0.182	0.003432	0.02771	Up
Atxn7l3b	Oligodendrocyte	0	0.07367	0.4063	0.5799	None	-0.1325	0.3894	0.5347	None	-0.2187	0.006538	0.04575	Down
Auts2	Oligodendrocyte	1	-0.7165	2.476e-15	2.653e-13	Down	-0.271	0.002209	0.01483	Down	0.4029	2.898e-07	6.81e-06	Up
Axin1	Oligodendrocyte	1	-0.2444	0.0005584	0.007112	Down	-0.1051	0.04969	0.1434	None	0.138	0.0567	0.2316	None
Azin1	Oligodendrocyte	1	0.7591	2.732e-18	4.009e-16	Up	0.534	2.973e-10	9.233e-09	Up	-0.2677	0.003315	0.02687	Down
B230118H07Rik	Oligodendrocyte	0	-0.1237	0.07287	0.2134	None	-0.1492	0.005531	0.03053	Down	0.01109	0.8754	0.9513	None
B230219D22Rik	Oligodendrocyte	1	0.2729	0.0003808	0.005267	Up	0.0994	0.1524	0.2996	None	-0.1854	0.01408	0.08409	None
B230307C23Rik	Oligodendrocyte	1	0.2158	0.006103	0.04266	Up	0.1868	0.0005858	0.005054	Up	-0.03649	0.101	0.3304	None
B3galt1	Oligodendrocyte	1	-0.296	0.0559	0.1822	None	-0.4453	0.0004892	0.004382	Down	-0.1843	0.009914	0.06401	None
B3galt5	Oligodendrocyte	1	0.5731	1.331e-07	4.703e-06	Up	0.6208	9.341e-07	1.761e-05	Up	-0.006953	0.1592	0.4366	None
B3gat1	Oligodendrocyte	1	-0.1283	0.004742	0.03589	Down	-0.1187	0.005054	0.02863	Down	0.01664	0.9132	0.9684	None
B430010I23Rik	Oligodendrocyte	1	-0.4023	0.002063	0.01923	Down	-0.4301	0.003402	0.02103	Down	0.02811	0.4351	0.7285	None
BC005537	Oligodendrocyte	1	-0.1982	0.003272	0.02744	Down	-0.0001154	0.01662	0.06793	None	0.2057	0.001426	0.01361	Up
BC005561	Oligodendrocyte	1	0.3608	0.0003024	0.004353	Up	0.01617	0.7916	0.8479	None	-0.3473	2.82e-05	0.0004377	Down
Babam2	Oligodendrocyte	0	0.06085	0.06809	0.2047	None	0.119	0.01018	0.04802	Up	0.07751	0.6731	0.8713	None
Bach2	Oligodendrocyte	1	0.1293	0.3838	0.5625	None	-0.3161	0.02648	0.09513	None	-0.4889	2.383e-06	4.66e-05	Down
Bag4	Oligodendrocyte	1	-0.09516	0.1212	0.2863	None	-0.1326	0.003302	0.02049	Down	-0.02921	0.5728	0.815	None
Bax	Oligodendrocyte	0	-0.1487	0.05358	0.1783	None	-0.1951	0.009095	0.04416	Down	-0.04554	0.7332	0.9012	None
Baz1b	Oligodendrocyte	0	0.2169	0.06403	0.1983	None	0.2453	0.009353	0.04503	Up	0.01841	0.6721	0.8709	None
Baz2a	Oligodendrocyte	1	0.02647	0.196	0.3785	None	0.1575	0.003243	0.02019	Up	0.1085	0.177	0.4625	None
Baz2b	Oligodendrocyte	1	0.01527	0.1172	0.2806	None	-0.1173	0.355	0.5043	None	-0.1808	0.001069	0.01075	Down
Bbs2	Oligodendrocyte	1	0.1083	0.04752	0.1661	None	-0.04939	0.4202	0.5616	None	-0.1535	0.003797	0.02995	Down
Bbs5	Oligodendrocyte	1	0.1734	0.006207	0.043	Up	-0.02156	0.4647	0.5972	None	-0.1867	0.0003077	0.003685	Down
Bbs9	Oligodendrocyte	1	-0.05598	0.002341	0.02112	None	-0.2324	0.006583	0.03476	Down	-0.1563	0.09131	0.3121	None
Bcar1	Oligodendrocyte	1	0.2481	0.01043	0.06224	None	0.3326	0.0009219	0.007343	Up	0.1073	0.4531	0.7412	None
Bcas1	Oligodendrocyte	1	-0.402	0.0009358	0.01067	Down	-0.7902	7.263e-17	4.612e-15	Down	-0.3877	5.98e-08	1.665e-06	Down
Bcas1os2	Oligodendrocyte	1	-0.8358	2.521e-11	1.719e-09	Down	-0.9463	6.454e-15	3.137e-13	Down	-0.08553	0.4081	0.704	None
Bcas3	Oligodendrocyte	1	0.2358	0.007489	0.04961	Up	-0.1121	0.3131	0.4685	None	-0.3621	0.0007881	0.008268	Down
Bcat1	Oligodendrocyte	1	0.7768	6.491e-16	7.303e-14	Up	0.5934	1.653e-08	4.055e-07	Up	-0.2376	0.001471	0.01397	Down
Bche	Oligodendrocyte	1	-0.03929	0.003929	0.03146	None	0.1117	0.00185	0.01291	Up	0.1493	0.05414	0.2237	None
Bcl2l1	Oligodendrocyte	1	1.396	3.468e-45	2.601e-42	Up	1.087	4.576e-37	8.717e-35	Up	-0.271	0.009123	0.05976	None
Bcl9	Oligodendrocyte	1	-0.2517	0.05944	0.1896	None	-0.2101	0.00531	0.02964	Down	0.0716	0.1101	0.3481	None
Bcorl1	Oligodendrocyte	1	0.09217	0.1306	0.2992	None	0.2365	0.0006402	0.005437	Up	0.1139	0.1266	0.3802	None
Bfsp2	Oligodendrocyte	1	0.1827	0.04466	0.1607	None	-0.1134	0.3396	0.4909	None	-0.2953	5.094e-05	0.0007494	Down
Bhlhe41	Oligodendrocyte	1	0.0132	0.5315	0.6783	None	0.3288	6.402e-05	0.0007808	Up	0.3029	2.439e-05	0.0003875	Up
Bicd1	Oligodendrocyte	1	0.2698	3.174e-05	0.0006434	Up	0.3586	4.407e-08	1.01e-06	Up	0.08917	0.4482	0.7387	None
Bicd2	Oligodendrocyte	1	0.01349	0.2358	0.4237	None	-0.2554	0.02023	0.07849	None	-0.2545	7.997e-05	0.001132	Down
Bin1	Oligodendrocyte	1	-0.4693	6.082e-05	0.001089	Down	0.3291	0.005877	0.03189	Up	0.786	1.064e-17	1.181e-15	Up
Bmp2k	Oligodendrocyte	1	0.06469	0.7887	0.8588	None	0.4691	8.962e-05	0.001042	Up	0.3679	0.0005055	0.005678	Up
Bmyc	Oligodendrocyte	1	-0.05521	0.2284	0.4146	None	-0.2511	0.0003043	0.002983	Down	-0.176	0.00472	0.03589	Down
Bnip2	Oligodendrocyte	1	-0.1065	0.04787	0.1671	None	-0.1471	0.007289	0.03739	Down	-0.02317	0.7425	0.9036	None
Borcs7	Oligodendrocyte	1	-0.03317	0.3682	0.5495	None	-0.1644	0.001155	0.008824	Down	-0.1179	0.01978	0.1084	None
Brd4	Oligodendrocyte	1	-0.005874	0.02178	0.1033	None	0.4162	0.000112	0.001253	Up	0.4399	5.505e-05	0.0008012	Up
Brd7	Oligodendrocyte	1	0.1663	0.09456	0.2493	None	0.3222	0.0004909	0.004392	Up	0.1206	0.2581	0.5614	None
Brd9	Oligodendrocyte	1	0.1375	0.1121	0.2739	None	-0.1735	0.2067	0.3602	None	-0.2869	0.003127	0.02571	Down
Brwd1	Oligodendrocyte	1	-0.0002896	0.03119	0.1305	None	0.3515	8.798e-05	0.001025	Up	0.3369	0.002968	0.02465	Up
Bsg	Oligodendrocyte	1	0.01979	0.03929	0.1497	None	-0.2898	0.01117	0.05096	None	-0.338	0.0002821	0.003421	Down
Btbd3	Oligodendrocyte	1	-0.2181	0.005787	0.04116	Down	-0.2	0.004486	0.02592	Down	0.03696	0.08658	0.3022	None
Btbd7	Oligodendrocyte	1	0.202	0.01632	0.08501	None	0.239	8.251e-05	0.0009791	Up	0.06218	0.351	0.6575	None
Btf3l4	Oligodendrocyte	0	0.03964	0.3136	0.4997	None	0.1155	0.007012	0.03634	Up	0.06676	0.3861	0.6885	None
Btrc	Oligodendrocyte	1	-0.1498	0.09329	0.2473	None	0.1784	0.04483	0.1337	None	0.3202	0.003733	0.02951	Up
C030029H02Rik	Oligodendrocyte	1	-0.08872	0.0424	0.1563	None	0.8078	1.397e-11	4.928e-10	Up	0.8822	6.355e-15	5.375e-13	Up
C2cd2	Oligodendrocyte	1	0.4926	3.814e-09	1.866e-07	Up	0.8122	6.871e-20	5.381e-18	Up	0.2543	0.004596	0.0351	Up
C2cd3	Oligodendrocyte	1	0.09948	0.19	0.3719	None	0.1007	0.003844	0.023	Up	-0.02014	0.3606	0.6663	None
C530008M17Rik	Oligodendrocyte	1	0.3339	0.0002924	0.004275	Up	0.1948	0.01144	0.0517	None	-0.1766	0.06224	0.2467	None
Cab39l	Oligodendrocyte	1	0.5712	4.692e-17	5.976e-15	Up	-0.7337	2.634e-08	6.189e-07	Down	-1.324	7.392e-40	3.335e-37	Down
Cachd1	Oligodendrocyte	1	0.3806	4.576e-05	0.0008639	Up	0.6913	4.996e-13	2.001e-11	Up	0.2445	0.006327	0.0446	Up
Cacna1a	Oligodendrocyte	1	-0.02601	0.9418	0.9605	None	-0.2495	0.006672	0.0351	Down	-0.2194	0.002702	0.02288	Down
Cacna2d3	Oligodendrocyte	1	0.02968	0.7983	0.8646	None	0.2523	0.0001958	0.002044	Up	0.2339	7.045e-05	0.00101	Up
Cadm2	Oligodendrocyte	1	-0.4997	3.715e-05	0.000729	Down	0.135	0.3916	0.5367	None	0.6173	1.338e-10	6.657e-09	Up
Cadm4	Oligodendrocyte	1	-0.4136	0.0001988	0.003079	Down	-0.2345	0.05469	0.1531	None	0.1726	0.09613	0.3211	None
Cadps	Oligodendrocyte	1	-0.2423	0.04469	0.1607	None	0.169	0.2877	0.4452	None	0.4171	1.108e-05	0.0001937	Up
Calm1	Oligodendrocyte	1	0.3475	0.006531	0.04485	Up	-0.132	0.2784	0.4366	None	-0.5522	2.177e-08	6.789e-07	Down
Calm2	Oligodendrocyte	1	-0.06499	0.6147	0.7411	None	-0.2893	0.005967	0.03211	Down	-0.2446	0.01052	0.06723	None
Calr	Oligodendrocyte	1	-0.1879	0.06347	0.1972	None	-0.3164	0.000836	0.006797	Down	-0.1108	0.1877	0.4783	None
Camk1d	Oligodendrocyte	1	0.1416	1.678e-05	0.0003641	Up	0.7966	9.629e-18	6.527e-16	Up	0.62	4.331e-09	1.551e-07	Up
Camk2g	Oligodendrocyte	1	0.1348	0.01813	0.09145	None	0.2	0.0005181	0.004559	Up	0.04945	0.5188	0.7807	None
Camsap2	Oligodendrocyte	1	0.1939	0.06847	0.2057	None	0.4131	2.464e-05	0.0003366	Up	0.2198	0.01701	0.0974	None
Camta1	Oligodendrocyte	1	-0.1596	0.307	0.4936	None	0.2367	0.04618	0.1362	None	0.3769	0.0001042	0.001425	Up
Canx	Oligodendrocyte	0	-0.08431	0.2734	0.4618	None	-0.2133	0.01061	0.04927	Down	-0.1101	0.3837	0.6868	None
Capza1	Oligodendrocyte	1	0.09892	0.5104	0.6623	None	0.1941	0.007122	0.03677	Up	0.1076	0.02679	0.1373	None
Car11	Oligodendrocyte	1	-0.02827	0.4852	0.643	None	-0.2148	0.0001053	0.001186	Down	-0.1653	0.0006785	0.007311	Down
Car14	Oligodendrocyte	1	0.193	0.09134	0.2448	None	0.4279	1.089e-05	0.0001637	Up	0.2447	0.008856	0.05835	None
Car2	Oligodendrocyte	1	-0.6769	2.242e-13	1.846e-11	Down	-0.6759	1.431e-15	7.643e-14	Down	-0.06272	0.3279	0.6374	None
Cbfa2t2	Oligodendrocyte	1	-0.001084	0.03638	0.1426	None	-0.39	0.00295	0.01866	Down	-0.3778	0.0001974	0.00252	Down
Ccdc117	Oligodendrocyte	1	0.2121	0.003381	0.02811	Up	0.1777	0.03171	0.1075	None	-0.04346	0.5234	0.7839	None
Ccdc152	Oligodendrocyte	1	0.2098	0.007424	0.04922	Up	0.2629	0.0005276	0.004625	Up	0.0269	0.8634	0.9479	None
Ccdc191	Oligodendrocyte	1	0.2284	0.1135	0.2757	None	-0.1524	0.3797	0.5265	None	-0.3918	0.0002731	0.003335	Down
Ccdc28b	Oligodendrocyte	1	0.2874	2.917e-05	0.0005965	Up	0.08161	0.05638	0.1565	None	-0.2158	0.001893	0.0171	Down
Ccdc47	Oligodendrocyte	1	0.0846	0.08669	0.2365	None	0.1264	0.0006528	0.005518	Up	0.04903	0.582	0.8198	None
Ccdc50	Oligodendrocyte	1	-0.4744	0.0003735	0.005208	Down	-0.4622	0.0002184	0.002232	Down	0.001563	0.9962	0.998	None
Ccdc62	Oligodendrocyte	1	0.07499	0.1598	0.3369	None	0.2137	0.0006193	0.005277	Up	0.1215	0.08534	0.3	None
Ccdc88a	Oligodendrocyte	1	-0.3005	0.01013	0.06115	None	-0.363	6.639e-05	0.0008081	Down	-0.04789	0.3952	0.6954	None
Ccnd3	Oligodendrocyte	1	0.1767	0.001496	0.01521	Up	0.6031	3.106e-13	1.28e-11	Up	0.3853	1.786e-06	3.576e-05	Up
Ccng1	Oligodendrocyte	1	0.179	0.0002683	0.003985	Up				None	-0.09838	0.06146	0.2449	None
Ccnh	Oligodendrocyte	1	0.07896	0.05993	0.1904	None	-0.08733	0.6123	0.7136	None	-0.1706	0.006371	0.04481	Down
Ccnk	Oligodendrocyte	1	-0.141	0.006109	0.04266	Down	-0.206	0.0004046	0.003768	Down	-0.0257	0.8644	0.9485	None
Ccnl2	Oligodendrocyte	1	0.2772	0.01742	0.0894	None	-0.07914	0.615	0.7158	None	-0.3348	0.001635	0.01524	Down
Ccny	Oligodendrocyte	1	0.2724	0.0002837	0.004173	Up	0.04943	0.0009056	0.007229	None	-0.2692	0.01821	0.1018	None
Ccser2	Oligodendrocyte	0	-0.1788	0.1881	0.3695	None	-0.3394	0.005179	0.02918	Down	-0.1026	0.4436	0.7365	None
Cct3	Oligodendrocyte	1	0.1697	0.004641	0.03548	Up	0.1654	0.007126	0.03677	Up	-0.02044	0.8858	0.956	None
Cct6a	Oligodendrocyte	1	0.1114	0.006852	0.04627	Up	-0.02946	0.004186	0.02455	None	-0.1549	0.07042	0.2657	None
Cct7	Oligodendrocyte	1	0.107	0.001982	0.01874	Up	0.1141	0.005059	0.02863	Up	-0.005824	0.7516	0.9083	None
Cd81	Oligodendrocyte	1	0.4605	7.601e-05	0.001306	Up	0.3956	8.573e-05	0.001004	Up	-0.02707	0.9667	0.9887	None
Cdc14a	Oligodendrocyte	1	0.05678	0.2535	0.4425	None	-0.3034	2.693e-06	4.612e-05	Down	-0.3356	7.091e-11	3.691e-09	Down
Cdc37l1	Oligodendrocyte	1	0.3428	1.272e-20	2.321e-18	Up	0.2311	4.073e-13	1.66e-11	Up	-0.1009	0.02353	0.1244	None
Cdc42	Oligodendrocyte	1	0.209	0.001902	0.0181	Up	0.2022	0.005281	0.02953	Up	-0.01946	0.6047	0.8342	None
Cdc42bpa	Oligodendrocyte	1	0.1569	0.04687	0.1648	None	0.519	9.12e-23	8.572e-21	Up	0.4078	3.404e-19	4.702e-17	Up
Cdc42ep2	Oligodendrocyte	1	-0.1181	0.02962	0.1264	None	0.1184	0.038	0.1203	None	0.2299	0.001548	0.01461	Up
Cdc42se2	Oligodendrocyte	1	-0.3775	0.006814	0.04613	Down	-0.3625	0.01051	0.04895	Down	0.03586	0.9128	0.9684	None
Cdh10	Oligodendrocyte	1	0.09755	0.09404	0.2484	None	-0.2839	0.09557	0.2239	None	-0.3831	4.911e-05	0.0007257	Down
Cdh11	Oligodendrocyte	1	-0.1409	0.1089	0.2691	None	-0.2847	0.0003155	0.003071	Down	-0.08544	0.2149	0.5147	None
Cdh2	Oligodendrocyte	1	-1.206	2.232e-41	1.076e-38	Down	-1.295	9.266e-53	3.842e-50	Down	-0.1658	0.1167	0.3608	None
Cdh20	Oligodendrocyte	1	-0.4661	8.416e-07	2.492e-05	Down	-1.156	3.27e-43	7.949e-41	Down	-0.7774	8.835e-24	1.661e-21	Down
Cdh6	Oligodendrocyte	0	0.06366	0.384	0.5625	None	-0.06908	0.4663	0.5984	None	-0.1513	0.006411	0.04505	Down
Cdip1	Oligodendrocyte	1	0.09704	0.05462	0.1797	None	0.3125	0.000459	0.004143	Up	0.2122	0.1159	0.3594	None
Cdk11b	Oligodendrocyte	1	0.1987	0.007705	0.05079	None	-0.06339	0.3995	0.5426	None	-0.2638	0.002358	0.02049	Down
Cdk12	Oligodendrocyte	1	-0.1201	0.0007566	0.009056	Down	-0.08505	0.4161	0.5574	None	0.08601	0.002302	0.02015	None
Cdk13	Oligodendrocyte	0	0.2288	0.07726	0.221	None	0.2963	0.002791	0.01787	Up	0.06491	0.6071	0.8345	None
Cdk19	Oligodendrocyte	1	-0.2121	0.0642	0.1985	None	-0.3887	2.673e-07	5.477e-06	Down	-0.1896	0.0006382	0.007	Down
Cdk5rap2	Oligodendrocyte	1	-0.2104	0.006752	0.0459	Down	-0.5641	2.392e-05	0.0003287	Down	-0.3451	2.183e-06	4.294e-05	Down
Cdr2	Oligodendrocyte	1	0.1841	0.007819	0.05134	None	0.2779	0.0001589	0.001715	Up	0.07824	0.3705	0.6765	None
Cdr2l	Oligodendrocyte	1	-0.05937	0.4507	0.6137	None	0.2059	0.01069	0.04937	Up	0.2454	0.0009666	0.009907	Up
Celf1	Oligodendrocyte	1	0.002443	0.9919	0.9942	None	0.2768	0.009179	0.04447	Up	0.263	0.002138	0.01896	Up
Celf2	Oligodendrocyte	1	0.1399	0.06139	0.1935	None	-0.0974	0.2282	0.3827	None	-0.2283	2.218e-05	0.0003599	Down
Cenpp	Oligodendrocyte	1	0.05116	0.5707	0.708	None	-0.2423	0.01258	0.05579	None	-0.2805	0.0002648	0.003258	Down
Cep164	Oligodendrocyte	1	0.1555	0.005095	0.03809	Up	-0.001054	0.04747	0.1387	None	-0.1534	0.04413	0.1951	None
Cep295	Oligodendrocyte	1	0.09587	0.01705	0.088	None	-0.1483	0.01464	0.06186	None	-0.2595	0.0009137	0.009426	Down
Cep44	Oligodendrocyte	1	0.1583	0.04681	0.1646	None	-0.04889	0.7176	0.7941	None	-0.194	0.001918	0.01728	Down
Cep57	Oligodendrocyte	1	0.1485	0.001403	0.01448	Up	0.09501	0.01179	0.05296	None	-0.08098	0.1905	0.4824	None
Cep57l1	Oligodendrocyte	0	0.2109	0.005134	0.03833	Up	0.09496	0.3051	0.4597	None	-0.1033	0.1718	0.454	None
Cep97	Oligodendrocyte	1	-0.2035	0.09986	0.257	None	0.1125	0.05809	0.1598	None	0.314	0.002066	0.01847	Up
Cerk	Oligodendrocyte	1	0.1145	0.03209	0.133	None	0.2199	0.002907	0.01841	Up	0.1159	0.494	0.7649	None
Cers2	Oligodendrocyte	0	-0.3917	0.003754	0.0304	Down	-0.3187	0.02361	0.08733	None	0.04803	0.8825	0.9537	None
Chchd10	Oligodendrocyte	1	0.2666	8.904e-05	0.001506	Up	-0.07432	0.03684	0.1179	None	-0.3552	3.639e-08	1.057e-06	Down
Chd4	Oligodendrocyte	1	0.2956	0.0002683	0.003985	Up	0.3927	2.6e-06	4.471e-05	Up	0.07351	0.73	0.8991	None
Chdh	Oligodendrocyte	1	-0.208	0.001274	0.01348	Down	-0.08202	0.1269	0.2675	None	0.1219	0.09477	0.3191	None
Cherp	Oligodendrocyte	1	-0.1287	0.02298	0.1066	None	0.05903	0.06838	0.1793	None	0.1809	0.005625	0.04071	Up
Chgb	Oligodendrocyte	1	0.1364	0.08576	0.2348	None	-0.5806	6.052e-23	5.764e-21	Down	-0.7161	1.416e-41	7.372e-39	Down
Chic1	Oligodendrocyte	1	0.08512	0.1235	0.2895	None	0.1899	0.001345	0.01001	Up	0.09999	0.2176	0.5173	None
Chka	Oligodendrocyte	1	0.1533	0.2606	0.4494	None	0.3271	0.0003527	0.003373	Up	0.1378	0.05759	0.2341	None
Chn2	Oligodendrocyte	1	-0.05414	0.5599	0.6992	None	-0.3602	0.00589	0.03191	Down	-0.2693	0.01123	0.07064	None
Chordc1	Oligodendrocyte	1	0.366	0.0001473	0.002334	Up	0.1008	0.3244	0.4785	None	-0.2804	0.001424	0.01361	Down
Chpt1	Oligodendrocyte	1	0.249	0.01022	0.06147	None	-0.09341	0.4887	0.6161	None	-0.3402	6.992e-06	0.0001275	Down
Chst3	Oligodendrocyte	0	-0.0459	0.3212	0.5065	None	-0.1129	0.008964	0.04358	Down	-0.04824	0.3093	0.6189	None
Chsy3	Oligodendrocyte	1	-0.4159	2.664e-05	0.000551	Down	-0.5415	6.631e-08	1.461e-06	Down	-0.09092	0.1687	0.45	None
Chuk	Oligodendrocyte	1	0.1346	6.399e-07	1.911e-05	Up	-0.2092	0.009583	0.04582	Down	-0.3368	1.051e-05	0.0001852	Down
Ciao2a	Oligodendrocyte	1	0.1885	0.0004133	0.005659	Up	0.1092	0.04232	0.1293	None	-0.0802	0.2021	0.4985	None
Cipc	Oligodendrocyte	1	0.1532	0.00817	0.05298	None	0.3512	5.828e-06	9.412e-05	Up	0.199	0.08532	0.3	None
Cirbp	Oligodendrocyte	1	-0.2332	0.004741	0.03589	Down	0.1021	0.01334	0.05798	None	0.3263	6.948e-06	0.0001274	Up
Cisd2	Oligodendrocyte	1	0.1876	0.1753	0.3551	None	-0.1222	0.4767	0.6068	None	-0.307	0.001151	0.0114	Down
Ckb	Oligodendrocyte	1	0.5742	1.586e-06	4.388e-05	Up	-0.6228	2.836e-06	4.805e-05	Down	-1.209	9.65e-34	3.437e-31	Down
Clasp2	Oligodendrocyte	1	-0.1797	0.1448	0.3198	None	0.05071	0.07898	0.1976	None	0.2449	0.0001627	0.002138	Up
Clasrp	Oligodendrocyte	1	-0.4512	0.001205	0.01283	Down	-0.654	1.727e-06	3.091e-05	Down	-0.2104	0.0597	0.2398	None
Cldn11	Oligodendrocyte	1	-0.5553	3.789e-05	0.0007414	Down	0.4697	2.634e-07	5.413e-06	Up	1.03	9.724e-23	1.687e-20	Up
Cldn14	Oligodendrocyte	1	0.5585	2.733e-06	7.262e-05	Up	0.7372	3.711e-10	1.113e-08	Up	0.1729	0.06	0.2405	None
Cldnd1	Oligodendrocyte	1	-0.2977	0.0001291	0.002074	Down	-0.2422	0.007676	0.03887	Down	0.04018	0.253	0.5576	None
Clic4	Oligodendrocyte	1	-0.401	0.003999	0.0318	Down	-0.3306	0.02465	0.09032	None	0.1149	0.3352	0.6439	None
Clk1	Oligodendrocyte	1	0.2859	0.0006333	0.007886	Up	0.3139	0.0001709	0.00182	Up	0.05921	0.7639	0.9133	None
Clk2	Oligodendrocyte	1	0.2192	0.001071	0.01172	Up	-0.07188	0.17	0.3202	None	-0.2832	0.0003559	0.004152	Down
Clmn	Oligodendrocyte	1	-0.07331	0.8533	0.9025	None	0.9974	3.945e-16	2.261e-14	Up	1.082	1.258e-25	2.661e-23	Up
Clstn1	Oligodendrocyte	1	-0.1006	0.0004662	0.006195	Down	-0.1343	3.551e-05	0.0004696	Down	-0.03922	0.7548	0.9091	None
Clu	Oligodendrocyte	1	0.159	0.01372	0.07529	None	-0.001593	0.8351	0.8797	None	-0.1637	0.002659	0.02261	Down
Cmas	Oligodendrocyte	1	0.1624	0.0005145	0.006678	Up	0.09692	0.00919	0.04449	None	-0.06885	0.356	0.6613	None
Cmip	Oligodendrocyte	1	0.03633	0.5245	0.6731	None	0.2848	0.0005053	0.004469	Up	0.2073	0.008809	0.05811	None
Cmss1	Oligodendrocyte	1	0.8715	1.042e-14	1.034e-12	Up	1.341	7.826e-40	1.576e-37	Up	0.4679	3.541e-09	1.281e-07	Up
Cnksr3	Oligodendrocyte	1	0.2831	0.001626	0.01618	Up	0.1397	0.267	0.4256	None	-0.1417	0.04483	0.1974	None
Cnnm2	Oligodendrocyte	0	-0.02491	0.937	0.958	None	0.1698	0.07717	0.1942	None	0.1991	0.005488	0.04006	Up
Cnot1	Oligodendrocyte	1	0.03997	0.1007	0.2579	None	0.1037	0.001589	0.0114	Up	0.06425	0.3441	0.6506	None
Cnot10	Oligodendrocyte	1	0.2858	3.454e-05	0.0006878	Up	0.403	7.291e-07	1.408e-05	Up	0.09867	0.5944	0.828	None
Cntfr	Oligodendrocyte	1	0.007868	0.6818	0.7865	None	0.191	0.00226	0.0151	Up	0.1842	0.001321	0.01282	Up
Cntn1	Oligodendrocyte	1	0.01944	0.8877	0.9251	None	-0.2363	0.001982	0.01367	Down	-0.2166	0.0003129	0.003728	Down
Cntn2	Oligodendrocyte	1	-0.09406	0.05321	0.1775	None	0.3543	1.136e-05	0.0001689	Up	0.4332	2.23e-05	0.0003611	Up
Cntn3	Oligodendrocyte	1	0.566	0.0006045	0.007596	Up	-0.1006	0.6971	0.7792	None	-0.6882	1.217e-07	3.132e-06	Down
Cog5	Oligodendrocyte	1	-0.1895	0.2925	0.4798	None	0.2159	0.1235	0.263	None	0.4064	0.0005214	0.005831	Up
Cog7	Oligodendrocyte	1	-0.1727	0.003455	0.02865	Down	-0.149	0.00525	0.02942	Down	0.03183	0.475	0.7535	None
Col11a2	Oligodendrocyte	1	-0.01356	0.1072	0.2667	None	-0.1211	0.004894	0.02787	Down	-0.08175	0.09953	0.3276	None
Cop1	Oligodendrocyte	1	-0.007311	0.02731	0.1203	None	0.1826	0.001638	0.01167	Up	0.2012	0.0717	0.2691	None
Cops5	Oligodendrocyte	1	0.1666	0.003601	0.02949	Up	0.144	0.001108	0.008558	Up	-0.02787	0.9026	0.9632	None
Cox4i1	Oligodendrocyte	1	0.5168	4.556e-05	0.0008639	Up	0.07785	0.2955	0.4524	None	-0.476	1.13e-05	0.0001966	Down
Cox5a	Oligodendrocyte	1	0.4138	2.232e-05	0.0004722	Up	-0.03066	0.5188	0.6401	None	-0.4588	2.671e-09	1.01e-07	Down
Cox6a1	Oligodendrocyte	1	0.2561	0.003278	0.02745	Up	0.09612	0.1713	0.3214	None	-0.1744	0.03907	0.1794	None
Cox6b1	Oligodendrocyte	0	-0.01754	0.8448	0.897	None	-0.1918	0.03105	0.1056	None	-0.1807	0.007046	0.0488	Down
Cox7a2	Oligodendrocyte	1	0.2343	0.004448	0.03439	Up	0.0188	0.3597	0.5084	None	-0.221	0.0009678	0.009907	Down
Cox7c	Oligodendrocyte	1	0.1608	0.1484	0.3238	None	-0.114	0.2157	0.3694	None	-0.3029	0.003372	0.02727	Down
Cox8a	Oligodendrocyte	1	0.3476	0.001134	0.01223	Up	-0.0638	0.4439	0.5805	None	-0.4211	1.731e-06	3.493e-05	Down
Cpd	Oligodendrocyte	1	-0.3014	0.04068	0.1524	None	-0.5969	1.548e-05	0.0002214	Down	-0.2866	0.01174	0.07322	None
Cpeb3	Oligodendrocyte	1	-0.1488	0.2977	0.4847	None	-0.3481	0.0005028	0.004458	Down	-0.219	0.01504	0.08845	None
Cpeb4	Oligodendrocyte	1	-0.2523	0.01248	0.07031	None	-0.2553	0.006117	0.03282	Down	0.03024	0.8608	0.9474	None
Cpm	Oligodendrocyte	1	0.4339	5.522e-08	2.106e-06	Up	0.863	2.294e-16	1.336e-14	Up	0.4284	0.0004247	0.004879	Up
Cpq	Oligodendrocyte	1	0.09953	0.1142	0.2762	None	0.2335	7.856e-05	0.000937	Up	0.1247	0.0402	0.1831	None
Cradd	Oligodendrocyte	1	-0.2562	0.004515	0.03475	Down	-0.2566	0.003963	0.02354	Down	0.01182	0.2608	0.5627	None
Crebbp	Oligodendrocyte	1	-0.08381	0.04095	0.1526	None	0.2421	0.0348	0.1137	None	0.316	0.005205	0.03858	Up
Crebrf	Oligodendrocyte	1	0.2934	0.002593	0.02297	Up	0.8333	9.122e-15	4.287e-13	Up	0.5339	3.443e-07	7.87e-06	Up
Crebzf	Oligodendrocyte	1	-0.2993	0.007743	0.05099	None	-0.3589	0.003634	0.02199	Down	-0.05414	0.7517	0.9083	None
Crim1	Oligodendrocyte	1	-0.1834	0.00245	0.02193	Down	-0.1375	0.02869	0.1005	None	0.03441	0.7665	0.9141	None
Crk	Oligodendrocyte	1	-0.1845	0.0008408	0.009828	Down	0.003993	0.005593	0.0307	None	0.1728	0.03044	0.1505	None
Crlf3	Oligodendrocyte	1	0.1452	0.0003282	0.004674	Up	0.246	8.022e-07	1.537e-05	Up	0.07544	0.4336	0.7271	None
Crtc3	Oligodendrocyte	1	0.1595	0.05865	0.1877	None	0.264	0.00169	0.01196	Up	0.08113	0.3846	0.6868	None
Cry2	Oligodendrocyte	1	0.1054	0.07517	0.217	None	0.3518	1.5e-06	2.711e-05	Up	0.2415	0.0001385	0.001849	Up
Cryab	Oligodendrocyte	1	0.7566	1.291e-08	5.809e-07	Up	0.3735	0.009808	0.04662	Up	-0.3733	6.439e-06	0.0001184	Down
Crybg3	Oligodendrocyte	0	0.1427	0.3574	0.5399	None	-0.1564	0.3283	0.4815	None	-0.2713	0.005682	0.04099	Down
Csad	Oligodendrocyte	1	0.2711	0.002876	0.02485	Up	0.05934	0.5669	0.6802	None	-0.2123	0.01398	0.08359	None
Csde1	Oligodendrocyte	1	0.2846	2.652e-08	1.092e-06	Up	0.2861	5.069e-06	8.291e-05	Up	0.0119	0.3049	0.614	None
Csmd2	Oligodendrocyte	1	-0.4759	8.888e-06	0.0002083	Down	0.003258	0.8525	0.8932	None	0.4565	3.022e-07	7.004e-06	Up
Csnk1g3	Oligodendrocyte	1	0.314	1.034e-07	3.673e-06	Up	0.6228	9.493e-16	5.187e-14	Up	0.2296	0.02282	0.1216	None
Cst3	Oligodendrocyte	1	1.686	4.638e-43	2.846e-40	Up	0.8837	4.194e-13	1.699e-11	Up	-0.8043	2.546e-16	2.461e-14	Down
Ctdspl	Oligodendrocyte	1	0.0981	0.2277	0.4139	None	0.2789	6.261e-05	0.0007665	Up	0.1378	0.04092	0.1852	None
Ctnna2	Oligodendrocyte	1	0.5233	2.95e-09	1.486e-07	Up	0.05602	0.3921	0.5368	None	-0.4408	4.143e-15	3.641e-13	Down
Ctnna3	Oligodendrocyte	1	0.07941	0.0166	0.08613	None	0.298	1.111e-10	3.527e-09	Up	0.2197	7.857e-06	0.0001422	Up
Ctnnd1	Oligodendrocyte	1	-0.113	0.1868	0.3682	None	-0.4293	0.0002108	0.002178	Down	-0.3099	0.0006035	0.006651	Down
Ctnnd2	Oligodendrocyte	1	0.02026	0.5506	0.6908	None	0.2659	0.006574	0.03476	Up	0.2161	0.06723	0.2583	None
Ctsl	Oligodendrocyte	1	0.2625	0.0004058	0.005579	Up	0.1094	0.2749	0.4335	None	-0.159	0.007683	0.05209	None
Cttnbp2	Oligodendrocyte	1	-0.4311	0.003608	0.02949	Down	-0.6018	1.539e-05	0.0002205	Down	-0.1783	0.2586	0.5614	None
Cwf19l2	Oligodendrocyte	1	0.2943	0.003299	0.02755	Up	0.03391	0.4745	0.6048	None	-0.2458	0.01561	0.09135	None
Cxxc5	Oligodendrocyte	1	-0.1595	0.1825	0.3638	None	0.08862	0.6288	0.7265	None	0.2602	0.001669	0.01549	Up
Cyld	Oligodendrocyte	1	0.2988	0.005404	0.03956	Up	-0.1875	0.3235	0.4778	None	-0.4483	2.183e-06	4.294e-05	Down
Cyp27a1	Oligodendrocyte	1	0.5418	2.67e-05	0.000551	Up	-0.05954	0.5164	0.6386	None	-0.593	3.279e-07	7.548e-06	Down
Cyp2j12	Oligodendrocyte	1	-0.3014	0.02205	0.104	None	-0.4549	0.000201	0.002093	Down	-0.1352	0.1996	0.4943	None
Cyp2j6	Oligodendrocyte	1	-0.1795	0.01381	0.07556	None	-0.2818	2.318e-05	0.0003216	Down	-0.1164	0.05632	0.2301	None
Cyp4f13	Oligodendrocyte	1	0.125	0.01532	0.08134	None	0.2801	1.318e-05	0.0001932	Up	0.1463	0.1006	0.3296	None
Cyth1	Oligodendrocyte	1	-0.1445	0.4268	0.5952	None	0.3191	0.006159	0.033	Up	0.4696	4.79e-05	0.0007108	Up
Czib	Oligodendrocyte	1	-0.04028	0.5341	0.6799	None	-0.2542	0.001807	0.01266	Down	-0.1935	0.006694	0.04665	Down
D5Ertd579e	Oligodendrocyte	1	-0.08185	0.07343	0.2141	None	-0.1838	0.001233	0.009312	Down	-0.1012	0.2608	0.5627	None
D7Ertd443e	Oligodendrocyte	1	-0.3643	0.007664	0.05062	None	0.2044	2.356e-05	0.0003256	Up	0.5649	2.124e-13	1.482e-11	Up
D830024N08Rik	Oligodendrocyte	1	-0.3298	0.002022	0.01901	Down	-0.2129	0.007499	0.03809	Down	0.1113	0.01937	0.1066	None
Daam1	Oligodendrocyte	1	-0.2393	0.03229	0.1333	None	0.3889	0.00353	0.02162	Up	0.6517	8.426e-12	4.712e-10	Up
Daam2	Oligodendrocyte	1	0.2992	1.579e-05	0.0003473	Up	0.531	3.781e-21	3.211e-19	Up	0.2687	3.443e-08	1.004e-06	Up
Dalrd3	Oligodendrocyte	1	-0.0683	0.4906	0.6478	None	-0.2888	0.001416	0.01041	Down	-0.1995	0.002214	0.01953	Down
Dapk2	Oligodendrocyte	1	0.04247	0.3783	0.558	None	0.4914	7.595e-09	1.99e-07	Up	0.4592	3.395e-10	1.596e-08	Up
Dazap1	Oligodendrocyte	1	-0.133	0.01211	0.06877	None	-0.2387	0.002574	0.01671	Down	-0.1009	0.476	0.7548	None
Dbi	Oligodendrocyte	1	0.3655	0.007034	0.04719	Up	0.1915	0.2333	0.3881	None	-0.1921	0.02086	0.1131	None
Dbndd2	Oligodendrocyte	1	0.8987	1.184e-22	2.665e-20	Up	0.5937	4.038e-10	1.201e-08	Up	-0.2967	5.886e-06	0.0001088	Down
Dcaf11	Oligodendrocyte	0	0.06459	0.4802	0.6391	None	-0.1009	0.1359	0.2798	None	-0.1514	0.003944	0.03096	Down
Dcaf17	Oligodendrocyte	0	-0.2471	0.05648	0.1832	None	-0.3289	0.008414	0.04165	Down	-0.08507	0.595	0.8283	None
Dcaf5	Oligodendrocyte	1	0.00735	0.9959	0.9969	None	0.258	0.005915	0.03197	Up	0.2524	0.001444	0.01375	Up
Dcaf8	Oligodendrocyte	1	0.1017	0.005621	0.04042	Up	-0.07314	0.1577	0.3055	None	-0.1411	0.08578	0.3008	None
Dctn4	Oligodendrocyte	1	0.6968	1.591e-08	6.972e-07	Up	0.2968	0.001514	0.01091	Up	-0.3955	0.001592	0.0149	Down
Dcun1d1	Oligodendrocyte	1	0.0892	0.2559	0.444	None	0.3065	0.0006198	0.005277	Up	0.1854	0.02196	0.1181	None
Dcun1d5	Oligodendrocyte	1	-0.1261	0.01102	0.06449	None	-0.3999	2.392e-05	0.0003287	Down	-0.2183	0.0183	0.102	None
Ddc	Oligodendrocyte	1	0.175	0.02051	0.09918	None	0.5578	2.536e-14	1.169e-12	Up	0.3773	1.025e-09	4.283e-08	Up
Ddit4	Oligodendrocyte	1	0.7205	5.306e-18	7.462e-16	Up	0.6667	1.904e-15	1.002e-13	Up	-0.05514	0.5774	0.8177	None
Ddr1	Oligodendrocyte	1	-0.5018	0.0004205	0.005745	Down	0.144	0.07065	0.1835	None	0.6456	8.173e-10	3.523e-08	Up
Ddrgk1	Oligodendrocyte	1	0.1219	0.002043	0.01918	Up	0.03483	0.02756	0.09768	None	-0.09095	0.339	0.6475	None
Ddx1	Oligodendrocyte	1	0.2038	0.00611	0.04266	Up	-0.02881	0.5788	0.6891	None	-0.2453	0.002316	0.02025	Down
Ddx17	Oligodendrocyte	1	0.04255	0.2962	0.4832	None	0.3459	0.0009856	0.007745	Up	0.319	0.009473	0.06158	None
Ddx24	Oligodendrocyte	1	0.3548	0.0006808	0.00834	Up	0.3031	0.005973	0.03211	Up	-0.08314	0.4739	0.7527	None
Ddx46	Oligodendrocyte	1	0.2721	0.02915	0.1252	None	-0.322	0.02197	0.08304	None	-0.5778	5.159e-10	2.312e-08	Down
Ddx5	Oligodendrocyte	1	-0.1006	0.6218	0.7459	None	-0.4178	1.902e-08	4.591e-07	Down	-0.346	4.124e-09	1.485e-07	Down
Degs1	Oligodendrocyte	1	-0.003876	0.303	0.4895	None	0.1665	0.006592	0.03478	Up	0.2047	0.02658	0.1366	None
Dennd5a	Oligodendrocyte	1	-0.3511	0.01179	0.06746	None	-0.4552	0.001299	0.009707	Down	-0.08035	0.652	0.8613	None
Dennd5b	Oligodendrocyte	1	0.4978	1.891e-07	6.354e-06	Up	1.352	1.82e-35	3.289e-33	Up	0.8585	4.385e-17	4.71e-15	Up
Dennd6a	Oligodendrocyte	1	0.1688	0.008835	0.05568	None	0.2077	0.001281	0.009582	Up	0.04654	0.7403	0.9025	None
Denr	Oligodendrocyte	1	-0.08937	0.0397	0.1506	None	-0.1805	0.001122	0.008644	Down	-0.09901	0.05857	0.2366	None
Depdc1b	Oligodendrocyte	1	-0.01653	0.8653	0.9106	None	-0.1637	0.003027	0.01905	Down	-0.1143	0.01311	0.07965	None
Depdc7	Oligodendrocyte	1	-0.1803	0.05962	0.1899	None	-0.3284	0.0001194	0.001328	Down	-0.16	0.04789	0.2058	None
Desi1	Oligodendrocyte	1	-0.2195	0.1724	0.3524	None	0.2654	0.006833	0.0356	Up	0.4811	1.693e-06	3.45e-05	Up
Desi2	Oligodendrocyte	1	0.04967	0.6296	0.7508	None	0.2352	0.001125	0.008651	Up	0.1747	0.007607	0.05179	None
Dgkd	Oligodendrocyte	1	0.116	0.01293	0.07227	None	0.2065	0.001132	0.008683	Up	0.1035	0.4219	0.716	None
Dguok	Oligodendrocyte	1	0.18	0.02001	0.09736	None	-0.03186	0.9074	0.932	None	-0.2007	0.002815	0.02358	Down
Dhps	Oligodendrocyte	1	0.2617	0.001748	0.01707	Up	0.2579	0.003565	0.02176	Up	-0.04167	0.1788	0.4649	None
Dhx16	Oligodendrocyte	1	-0.1085	0.2581	0.4468	None	-0.2597	0.0005408	0.004718	Down	-0.136	0.03686	0.172	None
Dhx30	Oligodendrocyte	1	-0.1517	0.05902	0.1884	None	-0.2948	0.001511	0.01091	Down	-0.1453	0.2658	0.569	None
Dhx36	Oligodendrocyte	1	0.2	0.001473	0.01502	Up	-0.1869	0.008546	0.04218	Down	-0.3943	0.0003296	0.003907	Down
Dip2a	Oligodendrocyte	1	-0.5962	1.296e-05	0.0002966	Down	-0.4955	9.986e-05	0.001135	Down	0.05811	0.7528	0.9087	None
Dip2b	Oligodendrocyte	1	0.1168	0.06152	0.1937	None	-0.3181	0.005895	0.03191	Down	-0.4454	1.453e-08	4.75e-07	Down
Dip2c	Oligodendrocyte	1	-0.02759	0.8686	0.9122	None	0.1096	0.005239	0.02939	Up	0.1394	0.006369	0.04481	Up
Dipk2a	Oligodendrocyte	0	-0.07794	0.3651	0.5464	None	-0.1642	0.01026	0.0482	Down	-0.08494	0.1291	0.3846	None
Dixdc1	Oligodendrocyte	1	0.7452	6.063e-14	5.18e-12	Up	0.2703	0.003642	0.02202	Up	-0.43	3.712e-06	7.076e-05	Down
Dlc1	Oligodendrocyte	1	0.3629	0.0005385	0.006924	Up	-0.1783	0.1844	0.337	None	-0.5165	8.594e-10	3.681e-08	Down
Dleu2	Oligodendrocyte	1	-0.3626	0.003849	0.03096	Down	-0.1534	0.1696	0.32	None	0.2086	0.1184	0.3641	None
Dlg1	Oligodendrocyte	1	-0.4591	0.0009983	0.01108	Down	-0.1475	0.4629	0.5956	None	0.3059	0.007781	0.0525	None
Dlg5	Oligodendrocyte	1	-0.0198	0.5173	0.6676	None	-0.2218	0.0003337	0.003214	Down	-0.1782	0.0003708	0.004304	Down
Dmpk	Oligodendrocyte	1	-0.04368	0.7889	0.8588	None	0.1744	0.02933	0.1018	None	0.2062	0.001153	0.01141	Up
Dmtf1	Oligodendrocyte	1	0.08581	0.208	0.3925	None	-0.3463	0.0006082	0.005209	Down	-0.3987	1.557e-05	0.0002615	Down
Dmxl1	Oligodendrocyte	1	0.0004787	0.1539	0.329	None	0.1086	0.0004302	0.003938	Up	0.09183	0.1534	0.4266	None
Dmxl2	Oligodendrocyte	1	-0.02544	0.008534	0.05444	None	0.1404	0.000624	0.005306	Up	0.1506	0.07466	0.2753	None
Dnaja1	Oligodendrocyte	1	0.5217	2.706e-08	1.107e-06	Up	0.2801	0.00155	0.01113	Up	-0.2439	0.01358	0.08199	None
Dnajb11	Oligodendrocyte	1	-0.01217	0.5463	0.6877	None	-0.3047	9.014e-05	0.001045	Down	-0.2937	3.874e-06	7.344e-05	Down
Dnajb2	Oligodendrocyte	1	-0.3832	0.004256	0.03328	Down	-0.3282	0.01321	0.05772	None	0.07595	0.4826	0.7593	None
Dnajb4	Oligodendrocyte	1	0.1932	0.0005833	0.007388	Up	0.192	0.008062	0.04033	Up	-0.01349	0.2446	0.5498	None
Dnajb6	Oligodendrocyte	1	0.2836	0.001324	0.01386	Up	0.2262	0.0001714	0.001823	Up	-0.05529	0.6654	0.8667	None
Dnajc13	Oligodendrocyte	1	-0.0676	0.1258	0.2933	None	0.1581	0.001449	0.01054	Up	0.1939	0.01915	0.1056	None
Dnajc21	Oligodendrocyte	1	0.1449	0.002898	0.02501	Up	-0.05357	0.01915	0.07546	None	-0.1516	0.1076	0.3434	None
Dnajc6	Oligodendrocyte	1	-0.5918	2.13e-06	5.774e-05	Down	-0.3804	0.004765	0.02725	Down	0.2472	0.02832	0.1426	None
Dnm2	Oligodendrocyte	1	0.1335	0.0005095	0.006626	Up	0.4542	1.22e-07	2.622e-06	Up	0.3096	0.01454	0.08625	None
Dnmt3a	Oligodendrocyte	1	-0.1498	0.2017	0.3858	None	0.1985	0.006714	0.03521	Up	0.298	0.004185	0.03244	Up
Dock10	Oligodendrocyte	1	-0.2492	5.446e-14	4.794e-12	Down	-0.2269	4.178e-15	2.045e-13	Down	0.03087	0.3958	0.6956	None
Dock5	Oligodendrocyte	1	-0.1187	0.6207	0.7454	None	-0.4855	0.0008451	0.006847	Down	-0.3998	0.0008999	0.009297	Down
Dock9	Oligodendrocyte	1	0.2116	0.001298	0.01365	Up	0.1576	0.001988	0.0137	Up	-0.08292	0.6023	0.8332	None
Dpf2	Oligodendrocyte	1	0.1163	0.01453	0.07822	None	0.1916	0.00877	0.04296	Up	0.07691	0.319	0.6288	None
Dpm1	Oligodendrocyte	1	0.2855	0.001812	0.0175	Up	0.04093	0.02525	0.09187	None	-0.2182	0.0621	0.2463	None
Dpy19l1	Oligodendrocyte	1	-0.548	0.0001124	0.001846	Down	-0.6069	1.728e-06	3.091e-05	Down	-0.09245	0.1055	0.3392	None
Dpy19l4	Oligodendrocyte	1	-0.2358	6.449e-05	0.001134	Down	-0.2049	0.0008137	0.006638	Down	0.05509	0.5603	0.8081	None
Dpysl2	Oligodendrocyte	1	0.2696	0.008405	0.05388	None	0.4967	9.371e-06	0.000143	Up	0.2482	0.06506	0.2535	None
Dpysl5	Oligodendrocyte	1	0.1121	0.001639	0.01627	Up	0.08759	0.01453	0.06157	None	-0.03335	0.4526	0.7407	None
Dram2	Oligodendrocyte	0	-0.1643	0.02138	0.1022	None	-0.1752	0.01029	0.04825	Down	0.007764	0.9936	0.9977	None
Drg1	Oligodendrocyte	1	-0.3279	0.02372	0.109	None	-0.2746	0.009301	0.04488	Down	0.08681	0.0807	0.2891	None
Dscam	Oligodendrocyte	1	-0.0009614	0.9286	0.9523	None	0.337	0.0002188	0.002232	Up	0.3395	1.329e-06	2.767e-05	Up
Dscaml1	Oligodendrocyte	1	-0.7569	1.847e-17	2.493e-15	Down	0.04728	0.1011	0.233	None	0.8014	1.267e-34	5.042e-32	Up
Dtd1	Oligodendrocyte	1	-0.06167	0.6616	0.7739	None	0.137	0.01438	0.0611	None	0.2122	0.0004749	0.005392	Up
Dtna	Oligodendrocyte	1	0.1279	0.5952	0.7256	None	0.9924	3.812e-16	2.203e-14	Up	0.8653	2.213e-18	2.723e-16	Up
Dtnb	Oligodendrocyte	1	0.2628	7.857e-05	0.001346	Up	0.8325	9.947e-17	6.151e-15	Up	0.5391	1.512e-07	3.848e-06	Up
Dtx3	Oligodendrocyte	1	-0.1193	0.07399	0.2147	None	-0.24	0.0002955	0.002914	Down	-0.12	0.07337	0.2724	None
Dtymk	Oligodendrocyte	1	-0.07785	0.5755	0.7112	None	-0.2459	0.002063	0.01408	Down	-0.1516	0.03124	0.1532	None
Dus3l	Oligodendrocyte	1	-0.1416	0.01384	0.07559	None	-0.1848	0.00516	0.0291	Down	-0.04017	0.4376	0.7305	None
Dusp10	Oligodendrocyte	1	-0.3739	4.179e-05	0.0008055	Down	-0.3982	1.078e-05	0.0001623	Down	-0.01338	0.9803	0.9929	None
Dusp11	Oligodendrocyte	1	0.3171	0.001688	0.01663	Up	-0.6062	5.974e-06	9.57e-05	Down	-0.8974	5.292e-18	6.07e-16	Down
Dusp15	Oligodendrocyte	1	0.0663	0.8411	0.8938	None	-0.4413	0.0004208	0.003878	Down	-0.4878	1.61e-06	3.302e-05	Down
Dusp16	Oligodendrocyte	1	-0.5003	4.212e-05	0.0008055	Down	-0.6955	3.443e-09	9.372e-08	Down	-0.2104	0.02715	0.1384	None
Dusp3	Oligodendrocyte	1	0.175	0.00704	0.04719	Up	0.2766	0.0005071	0.004478	Up	0.09812	0.3253	0.6345	None
Dvl1	Oligodendrocyte	1	0.01262	0.3206	0.5059	None	-0.1296	0.009329	0.04498	Down	-0.1269	0.03369	0.1615	None
Dym	Oligodendrocyte	1	-0.3579	5.393e-05	0.000976	Down	-0.1445	0.08907	0.2128	None	0.2167	0.01498	0.08822	None
Dync1i1	Oligodendrocyte	1	0.2514	0.004165	0.0328	Up	0.4321	4.64e-07	9.136e-06	Up	0.1516	0.07805	0.2829	None
Dync1li2	Oligodendrocyte	1	0.0646	0.00809	0.05266	None	0.4087	7.558e-05	0.0009045	Up	0.3425	0.005378	0.03964	Up
Dync2h1	Oligodendrocyte	1	0.3279	0.0001152	0.001883	Up	0.3011	0.0002535	0.002546	Up	-0.03915	0.7617	0.9119	None
E130307A14Rik	Oligodendrocyte	1	-0.3298	0.0008099	0.009549	Down	-0.1272	0.002073	0.01409	Down	0.1657	0.1638	0.4441	None
E130308A19Rik	Oligodendrocyte	1	0.561	1.298e-06	3.728e-05	Up	0.9668	1.669e-16	9.971e-15	Up	0.4394	0.0002091	0.002645	Up
E230001N04Rik	Oligodendrocyte	1	0.4361	2.169e-12	1.627e-10	Up	0.3145	1.094e-07	2.359e-06	Up	-0.1368	0.0448	0.1974	None
E230029C05Rik	Oligodendrocyte	1	0.02501	0.04863	0.1691	None	0.1273	0.001252	0.009412	Up	0.1044	0.1036	0.3353	None
E330020D12Rik	Oligodendrocyte	1	0.4257	0.001825	0.01755	Up	0.1596	0.3366	0.489	None	-0.2989	0.005662	0.04089	Down
Ech1	Oligodendrocyte	1	0.2289	0.001814	0.0175	Up	0.1997	0.008618	0.04246	Up	-0.04415	0.5236	0.7839	None
Edil3	Oligodendrocyte	1	-0.1875	3.351e-07	1.077e-05	Down	-0.2398	1.257e-15	6.762e-14	Down	-0.06953	0.002462	0.02129	None
Eed	Oligodendrocyte	1	-0.109	0.1439	0.3184	None	-0.154	0.001179	0.008985	Down	-0.05918	0.1707	0.4532	None
Efcab14	Oligodendrocyte	0	-0.2847	0.03803	0.1465	None	-0.366	0.007856	0.03956	Down	-0.0774	0.7386	0.9017	None
Efnb3	Oligodendrocyte	1	-0.4239	0.00158	0.01589	Down	-0.1268	0.3907	0.5358	None	0.3008	0.01762	0.09981	None
Efr3b	Oligodendrocyte	1	0.4557	3.217e-05	0.0006502	Up	-0.4848	0.0003838	0.003612	Down	-0.9236	1.905e-18	2.388e-16	Down
Ehbp1	Oligodendrocyte	1	-0.09841	0.2912	0.4784	None	0.3311	1.381e-07	2.941e-06	Up	0.4533	2.055e-08	6.497e-07	Up
Eid1	Oligodendrocyte	1	-0.1995	0.001058	0.01161	Down	-0.4229	5.37e-05	0.0006733	Down	-0.2236	0.005733	0.04131	Down
Eif1	Oligodendrocyte	1	0.3198	0.03292	0.135	None	0.004285	0.8381	0.8823	None	-0.3609	0.001677	0.01552	Down
Eif2ak4	Oligodendrocyte	1	0.17	0.004655	0.03548	Up	0.01763	0.202	0.3552	None	-0.1476	0.04758	0.2051	None
Eif2b4	Oligodendrocyte	1	0.142	0.08973	0.2419	None	0.1416	0.004774	0.02727	Up	-0.01062	0.3252	0.6345	None
Eif2s3y	Oligodendrocyte	1	-0.7882	4.984e-11	3.266e-09	Down	-0.2503	0.08894	0.2126	None	0.5317	1.608e-07	4.061e-06	Up
Eif3c	Oligodendrocyte	1	0.2521	0.0003684	0.005159	Up	0.1626	0.01984	0.07731	None	-0.1017	0.2698	0.5742	None
Eif3j1	Oligodendrocyte	1	0.2917	0.001516	0.01539	Up	0.3735	8.759e-05	0.001022	Up	0.05943	0.621	0.8432	None
Elavl3	Oligodendrocyte	1	-0.4773	0.0005272	0.006818	Down	0.1605	0.4391	0.5775	None	0.6553	3.392e-09	1.247e-07	Up
Elf2	Oligodendrocyte	1	0.1136	0.1272	0.2952	None	0.3037	0.0001742	0.001846	Up	0.1619	0.1036	0.3354	None
Ell	Oligodendrocyte	1	-0.09195	0.3999	0.575	None	0.1134	0.157	0.3051	None	0.1983	0.004149	0.03231	Up
Ell2	Oligodendrocyte	1	0.09952	0.0954	0.251	None	0.1972	0.000283	0.002806	Up	0.1027	0.1871	0.4772	None
Elmsan1	Oligodendrocyte	1	0.2622	9.137e-05	0.001542	Up	0.6039	8.426e-13	3.25e-11	Up	0.3435	1.96e-05	0.0003203	Up
Elovl5	Oligodendrocyte	1	0.148	0.005622	0.04042	Up	-0.02592	0.02175	0.08262	None	-0.1783	0.1308	0.3876	None
Elovl6	Oligodendrocyte	1	-0.2092	0.03485	0.139	None	-0.2304	0.002191	0.01472	Down	-0.02769	0.2941	0.6012	None
Emc10	Oligodendrocyte	1	0.1932	0.004717	0.03582	Up	-0.08182	0.01584	0.06562	None	-0.2875	0.004204	0.03251	Down
Emilin2	Oligodendrocyte	1	0.3643	4.888e-07	1.507e-05	Up	0.5706	6.258e-13	2.478e-11	Up	0.175	0.05517	0.2268	None
Eml1	Oligodendrocyte	1	-0.3473	0.03459	0.1386	None	-2.391	4.33e-82	7.631e-79	Down	-2.095	2.918e-88	1.975e-84	Down
Eml5	Oligodendrocyte	0	0.1616	0.2694	0.4569	None	-0.1224	0.499	0.6251	None	-0.2939	0.00249	0.02147	Down
Emsy	Oligodendrocyte	1	0.01089	0.4838	0.6421	None	0.1378	0.003259	0.02026	Up	0.1286	0.03974	0.1814	None
Enah	Oligodendrocyte	1	1.109	4.089e-20	7.263e-18	Up	1.669	1.026e-46	3.013e-44	Up	0.5588	7.894e-09	2.712e-07	Up
Endod1	Oligodendrocyte	1	0.5874	3.157e-09	1.567e-07	Up	0.6154	3.87e-10	1.156e-08	Up	0.01854	0.8814	0.9537	None
Enox1	Oligodendrocyte	1	-0.218	0.1083	0.2686	None	0.0106	0.1043	0.2373	None	0.1867	0.0004069	0.00469	Up
Enox2	Oligodendrocyte	0	0.1999	0.006821	0.04613	Up	0.1541	0.0533	0.1508	None	-0.06537	0.6265	0.8471	None
Enpp2	Oligodendrocyte	1	-0.4615	9.865e-16	1.092e-13	Down	-0.435	1.522e-17	1.012e-15	Down	-0.03661	0.7969	0.9261	None
Enpp4	Oligodendrocyte	1	0.09527	0.1132	0.2756	None	0.2218	0.002818	0.01799	Up	0.1227	0.1194	0.3661	None
Enpp6	Oligodendrocyte	1	-0.1424	0.4193	0.5898	None	-0.8817	1.052e-12	4.029e-11	Down	-0.6896	6.997e-14	5.261e-12	Down
Ep300	Oligodendrocyte	1	0.2019	0.02877	0.1241	None	0.2869	1.12e-05	0.0001673	Up	0.06072	0.0634	0.2502	None
Epb41l3	Oligodendrocyte	1	-0.1501	0.3702	0.5508	None	0.1765	0.0521	0.1481	None	0.3154	0.0003365	0.003969	Up
Epb41l4a	Oligodendrocyte	1	-0.1309	0.09366	0.2479	None	0.1485	0.00886	0.04331	Up	0.2752	1.32e-06	2.758e-05	Up
Epb41l4b	Oligodendrocyte	0	-0.141	0.1715	0.3516	None	0.1238	0.3531	0.5029	None	0.2356	0.002414	0.02091	Up
Epdr1	Oligodendrocyte	1	0.03873	0.2576	0.4464	None	0.1813	0.002315	0.01538	Up	0.1158	0.1799	0.4662	None
Epm2a	Oligodendrocyte	1	-0.199	0.004832	0.03636	Down	-0.2059	0.0004509	0.004096	Down	0.01358	0.5145	0.7776	None
Epn2	Oligodendrocyte	1	0.008965	0.02153	0.1026	None	0.1431	0.0001499	0.001626	Up	0.1282	0.2042	0.5007	None
Eps15	Oligodendrocyte	1	0.1227	0.08755	0.2381	None	0.3754	4.341e-05	0.0005594	Up	0.245	0.04392	0.1945	None
Eps15l1	Oligodendrocyte	1	0.06825	0.6924	0.7951	None	0.2911	0.0009265	0.007363	Up	0.178	0.01459	0.08643	None
Erbb4	Oligodendrocyte	1	-0.5089	0.0005033	0.006559	Down	-0.02136	0.1916	0.3443	None	0.4987	1.298e-06	2.72e-05	Up
Erbin	Oligodendrocyte	1	-0.4276	0.003138	0.02671	Down	-0.1995	0.06225	0.168	None	0.2365	0.005197	0.03858	Up
Erc1	Oligodendrocyte	1	-0.2524	0.0003027	0.004353	Down	-0.1945	0.007082	0.0366	Down	0.06356	0.5659	0.8121	None
Errfi1	Oligodendrocyte	1	1.747	1.829e-57	2.057e-54	Up	0.3524	1.019e-05	0.0001542	Up	-1.418	5.778e-48	4.888e-45	Down
Esd	Oligodendrocyte	1	0.1523	0.03022	0.1278	None	-0.01879	0.8547	0.8947	None	-0.1753	0.001283	0.01251	Down
Esf1	Oligodendrocyte	1	0.01114	0.2267	0.4129	None	0.1933	0.003625	0.02195	Up	0.18	0.04928	0.2098	None
Etnk1	Oligodendrocyte	1	0.1419	0.04905	0.1697	None	0.2665	0.001436	0.0105	Up	0.09962	0.5495	0.8022	None
Etv1	Oligodendrocyte	1	0.4259	0.0001203	0.001943	Up	-0.06056	0.7963	0.8504	None	-0.5056	3.114e-08	9.243e-07	Down
Evi2a	Oligodendrocyte	1	-0.4056	0.0004885	0.006402	Down	-0.1302	0.4332	0.5734	None	0.2629	0.003682	0.02914	Up
Ewsr1	Oligodendrocyte	1	-0.6898	1.795e-07	6.118e-06	Down	-0.4298	0.002484	0.01633	Down	0.2804	0.0245	0.1287	None
Exoc6b	Oligodendrocyte	1	-0.1931	0.04067	0.1524	None	0.1513	0.01196	0.05348	None	0.3525	0.0001204	0.001622	Up
Exoc7	Oligodendrocyte	1	0.07466	0.07036	0.2086	None	-0.1243	0.2579	0.415	None	-0.1961	0.001689	0.01562	Down
Extl3	Oligodendrocyte	1	0.2851	0.0009768	0.01088	Up	0.1648	0.04127	0.1272	None	-0.1526	0.1502	0.4201	None
Ezh1	Oligodendrocyte	1	0.1522	0.0005347	0.006888	Up	0.2297	7.935e-06	0.0001249	Up	0.06778	0.5007	0.7686	None
Fa2h	Oligodendrocyte	1	-0.4287	0.001399	0.01447	Down	-0.09146	0.1266	0.2674	None	0.2964	0.0006915	0.007404	Up
Fam102a	Oligodendrocyte	1	-0.4259	0.0004658	0.006195	Down	0.1231	0.006935	0.03602	Up	0.5277	1.147e-07	3.013e-06	Up
Fam107b	Oligodendrocyte	1	-0.1663	0.002873	0.02485	Down	-0.2876	1.526e-07	3.211e-06	Down				None
Fam117b	Oligodendrocyte	1	0.3236	0.0004598	0.006134	Up	0.7631	7.034e-15	3.35e-13	Up	0.449	5.916e-07	1.308e-05	Up
Fam120b	Oligodendrocyte	1	-0.1345	0.007575	0.05013	None	-0.2538	0.000716	0.00598	Down	-0.0939	0.3503	0.6572	None
Fam122a	Oligodendrocyte	1	0.1654	0.008651	0.05501	None	-0.001666	0.9705	0.9783	None	-0.1626	0.001594	0.0149	Down
Fam126b	Oligodendrocyte	1	0.1475	0.06063	0.1919	None	0.1499	0.004502	0.02599	Up	0.009209	0.3842	0.6868	None
Fam133b	Oligodendrocyte	1	0.07545	0.3983	0.5739	None	-0.2761	0.04696	0.1377	None	-0.3512	0.0002261	0.002823	Down
Fam149b	Oligodendrocyte	1	-0.2624	0.002005	0.01891	Down	-0.1793	0.0009249	0.007358	Down	0.08512	0.1914	0.483	None
Fam168a	Oligodendrocyte	1	-0.5618	6.972e-05	0.001213	Down	-0.7962	9.193e-10	2.689e-08	Down	-0.2352	0.03201	0.1559	None
Fam171b	Oligodendrocyte	1	0.3195	0.0009604	0.01079	Up	0.1132	0.009971	0.0473	Up	-0.2175	0.1365	0.3967	None
Fam172a	Oligodendrocyte	1	0.1969	0.04472	0.1607	None	-0.1609	0.392	0.5368	None	-0.342	0.001871	0.01699	Down
Fam193a	Oligodendrocyte	1	-0.2196	0.005827	0.04127	Down	0.1866	0.00177	0.01244	Up	0.3694	0.001162	0.01146	Up
Fam204a	Oligodendrocyte	1	-0.2153	0.001534	0.01555	Down	-0.3313	0.0001483	0.001613	Down	-0.1019	0.151	0.4213	None
Fam214a	Oligodendrocyte	1	0.8963	3.05e-21	5.718e-19	Up	1.824	5.042e-66	4.443e-63	Up	0.9059	9.291e-20	1.338e-17	Up
Fam222a	Oligodendrocyte	1	-0.3706	4.277e-07	1.355e-05	Down	-0.276	0.0007987	0.006559	Down	0.1097	0.1043	0.3361	None
Fam234a	Oligodendrocyte	1	-0.1154	0.5053	0.6589	None	-0.4336	0.00018	0.001896	Down	-0.2879	0.003117	0.02566	Down
Fam49b	Oligodendrocyte	1	-0.4162	0.0006054	0.007596	Down	-0.3021	0.0301	0.1035	None	0.1079	0.2691	0.5737	None
Fam53b	Oligodendrocyte	1	-0.06806	0.02797	0.122	None	-0.2948	0.007441	0.03797	Down	-0.2253	0.002711	0.02293	Down
Fam76a	Oligodendrocyte	1	0.1614	0.006795	0.0461	Up	0.2447	8.344e-05	0.0009852	Up	0.07233	0.5959	0.8289	None
Fam76b	Oligodendrocyte	1	0.1328	0.1285	0.297	None	-0.1003	0.556	0.6711	None	-0.2513	0.0006526	0.007112	Down
Fam98a	Oligodendrocyte	1	0.2351	0.005467	0.0397	Up	0.04341	0.7703	0.8328	None	-0.1759	0.02037	0.1111	None
Fan1	Oligodendrocyte	1	0.1764	0.00233	0.02108	Up	0.05984	0.1432	0.2879	None	-0.1462	0.04647	0.2025	None
Fancc	Oligodendrocyte	1	-0.2088	0.0001289	0.002074	Down	-0.2218	0.002896	0.01836	Down	0.01177	0.2597	0.562	None
Far1os	Oligodendrocyte	1	-0.7462	2.153e-09	1.101e-07	Down	-0.4149	0.003896	0.02321	Down	0.3545	0.0014	0.01348	Up
Farp1	Oligodendrocyte	1	-0.004472	0.4762	0.6353	None	0.2494	0.0001519	0.001644	Up	0.2444	8.75e-05	0.001209	Up
Farp2	Oligodendrocyte	1	-0.06944	0.01951	0.09632	None	-0.1568	0.003741	0.02244	Down	-0.08645	0.406	0.7028	None
Fat1	Oligodendrocyte	1	-0.243	0.001575	0.01587	Down	-0.1278	0.06282	0.1691	None	0.1261	0.05581	0.229	None
Fau	Oligodendrocyte	1	0.2107	0.03759	0.1455	None	-0.09559	0.4763	0.6066	None	-0.3054	0.0003619	0.004208	Down
Fbl	Oligodendrocyte	1	-0.5824	1.938e-07	6.476e-06	Down	-0.3296	0.00514	0.02901	Down	0.2587	0.01428	0.08506	None
Fbn2	Oligodendrocyte	1	-0.2651	0.0004325	0.005874	Down	-0.3157	8.843e-06	0.0001365	Down	-0.03851	0.2497	0.5544	None
Fbxl3	Oligodendrocyte	1	-0.2187	0.04241	0.1563	None	0.0377	0.6283	0.7263	None	0.283	0.0007943	0.008307	Up
Fbxo11	Oligodendrocyte	1	0.1299	0.09595	0.2518	None	0.2074	0.002181	0.01467	Up	0.09055	0.3966	0.6956	None
Fbxo21	Oligodendrocyte	1	0.15	0.001245	0.01321	Up	0.2708	0.002546	0.0166	Up	0.08976	0.1195	0.3662	None
Fbxo28	Oligodendrocyte	1	-0.08122	0.324	0.5097	None	0.1225	0.1198	0.258	None	0.2084	0.004154	0.03231	Up
Fbxo3	Oligodendrocyte	1	0.1138	0.02997	0.1272	None	0.1308	0.001397	0.01033	Up	0.02206	0.5213	0.7828	None
Fbxo32	Oligodendrocyte	1	-0.46	3.943e-05	0.0007675	Down	-0.3708	0.0005285	0.004625	Down	0.1354	0.2267	0.528	None
Fbxo44	Oligodendrocyte	1	-0.002661	0.1791	0.3596	None	-0.2441	0.009513	0.04559	Down	-0.247	8.665e-05	0.001202	Down
Fbxo7	Oligodendrocyte	1	0.2978	0.0002125	0.003252	Up	0.05462	0.1389	0.2836	None	-0.257	0.003874	0.03049	Down
Fbxw15	Oligodendrocyte	1	-0.03949	0.04575	0.163	None	0.2062	0.03832	0.1209	None	0.2413	0.0009706	0.009921	Up
Fbxw2	Oligodendrocyte	1	-0.1467	0.005251	0.03891	Down	-0.08011	0.2465	0.4023	None	0.07698	0.04715	0.2047	None
Fermt2	Oligodendrocyte	1	0.1836	0.003929	0.03146	Up	-0.1578	0.07507	0.1902	None	-0.3713	0.0003447	0.004042	Down
Fez1	Oligodendrocyte	1	-0.185	0.2832	0.4711	None	-0.726	6.406e-08	1.42e-06	Down	-0.5714	6.253e-07	1.374e-05	Down
Fgd3	Oligodendrocyte	1	-0.2562	0.002314	0.02101	Down	-0.2026	0.02636	0.09479	None	0.04891	0.6523	0.8613	None
Fgd4	Oligodendrocyte	1	-0.08955	0.04481	0.1607	None	-0.2103	0.0002171	0.002227	Down	-0.09095	0.05021	0.2126	None
Fgf1	Oligodendrocyte	1	0.05553	0.244	0.4328	None	0.3415	0.00122	0.009238	Up	0.2399	0.04176	0.188	None
Fgf12	Oligodendrocyte	1	0.3154	0.003714	0.03013	Up	0.3991	0.0005751	0.004968	Up	0.06152	0.8012	0.9263	None
Fgf14	Oligodendrocyte	1	0.03458	0.5389	0.6829	None	-0.1671	0.00433	0.02527	Down	-0.1982	5.173e-05	0.0007594	Down
Fgfr2	Oligodendrocyte	1	-0.2679	6.355e-09	3e-07	Down	-0.06495	0.2025	0.3557	None	0.2041	6.214e-07	1.37e-05	Up
Fggy	Oligodendrocyte	1	0.2536	0.01035	0.06205	None	0.4154	1.391e-05	0.0002026	Up	0.1653	0.07312	0.272	None
Fhit	Oligodendrocyte	1	0.3731	5.143e-05	0.0009357	Up	0.6703	6.357e-11	2.114e-09	Up	0.2435	0.00115	0.0114	Up
Fibp	Oligodendrocyte	1	-0.1016	0.231	0.4177	None	-0.2228	0.0008002	0.006559	Down	-0.1148	0.04876	0.2084	None
Fign	Oligodendrocyte	1	-0.05244	0.01158	0.06651	None	-0.4644	0.00103	0.008075	Down	-0.3978	1.29e-06	2.71e-05	Down
Fkbp2	Oligodendrocyte	1	0.05103	0.7517	0.8341	None	-0.1464	0.06694	0.1767	None	-0.1935	0.002464	0.02129	Down
Fkbp4	Oligodendrocyte	1	0.306	6.637e-06	0.0001583	Up	0.2262	0.0009558	0.007588	Up	-0.09633	0.2329	0.5364	None
Fkbp5	Oligodendrocyte	1	1.209	7.312e-28	1.974e-25	Up	2.325	1.424e-89	5.02e-86	Up	1.086	2.629e-26	5.931e-24	Up
Fmn1	Oligodendrocyte	1	0.2343	0.02108	0.101	None	0.4977	2.484e-07	5.119e-06	Up	0.2068	0.03007	0.149	None
Fnbp1	Oligodendrocyte	1	-0.597	2.852e-36	1.013e-33	Down	-0.3512	3.232e-18	2.278e-16	Down	0.2199	6.594e-05	0.0009514	Up
Fndc3a	Oligodendrocyte	1	-0.1186	0.05597	0.1823	None	-0.2593	0.005339	0.02975	Down	-0.1435	0.1202	0.3671	None
Fnip1	Oligodendrocyte	0	0.05288	0.099	0.2563	None	0.1822	0.007271	0.03736	Up	0.1338	0.3896	0.6912	None
Fnip2	Oligodendrocyte	1	-0.2685	0.03017	0.1278	None	0.5274	2.256e-09	6.335e-08	Up	0.8458	1.535e-24	2.967e-22	Up
Fntb	Oligodendrocyte	1	0.3425	0.0002686	0.003985	Up	0.1056	0.2218	0.3761	None	-0.2529	0.002007	0.01799	Down
Focad	Oligodendrocyte	1	0.1031	0.2633	0.4513	None	0.3868	5.151e-06	8.404e-05	Up	0.2857	0.0002265	0.002823	Up
Folh1	Oligodendrocyte	1	-0.6239	1.541e-07	5.336e-06	Down	-0.669	1.657e-08	4.055e-07	Down	-0.01864	0.9477	0.9832	None
Foxn3	Oligodendrocyte	1	-0.2434	0.09214	0.2457	None	0.3282	1.042e-06	1.943e-05	Up	0.5923	1.666e-11	9.168e-10	Up
Foxo3	Oligodendrocyte	1	-0.13	0.08394	0.2317	None	0.2281	0.001486	0.01075	Up	0.3358	1.119e-07	2.977e-06	Up
Foxp1	Oligodendrocyte	1	-0.1563	0.07372	0.2145	None	0.1804	0.05817	0.1598	None	0.3958	0.001581	0.01483	Up
Frmd4a	Oligodendrocyte	1	0.147	0.02893	0.1246	None	-0.419	0.0002612	0.002608	Down	-0.5818	2.986e-11	1.579e-09	Down
Frmd4b	Oligodendrocyte	1	-0.2784	0.04419	0.16	None	-0.5412	2.935e-06	4.95e-05	Down	-0.293	0.006868	0.04776	Down
Frmd5	Oligodendrocyte	1	-0.2611	2.08e-07	6.881e-06	Down	-0.3677	1.142e-13	4.851e-12	Down	-0.1251	0.02529	0.1315	None
Fsd1l	Oligodendrocyte	1	0.4965	1.882e-05	0.000402	Up	0.4205	0.002568	0.01671	Up	-0.0391	0.05322	0.2215	None
Fubp1	Oligodendrocyte	1	0.324	4.167e-05	0.0008055	Up	0.1872	0.01534	0.06406	None	-0.1284	0.1306	0.3874	None
Fus	Oligodendrocyte	1	-0.08737	0.06979	0.2079	None	-0.8966	7.378e-14	3.23e-12	Down	-0.8157	1.536e-21	2.475e-19	Down
Fyco1	Oligodendrocyte	1	0.1594	0.0009375	0.01067	Up	0.02961	0.02776	0.098	None	-0.1306	0.1127	0.3539	None
Gab1	Oligodendrocyte	1	-0.4169	0.001138	0.01224	Down	-0.3682	0.00262	0.01695	Down	0.06467	0.8026	0.9267	None
Gab2	Oligodendrocyte	1	0.01405	0.1565	0.3324	None	-0.4957	5.149e-05	0.0006493	Down	-0.4962	2.479e-05	0.0003929	Down
Gabrr2	Oligodendrocyte	1	0.01373	0.07651	0.2198	None	0.3729	5.537e-08	1.251e-06	Up	0.3612	9.729e-09	3.292e-07	Up
Galnt12	Oligodendrocyte	1	0.1287	0.0192	0.09545	None	0.00524	0.7655	0.8291	None	-0.125	0.005018	0.03773	Down
Galnt16	Oligodendrocyte	1	0.1596	0.06363	0.1974	None	0.5034	4.01e-09	1.075e-07	Up	0.3467	2.583e-05	0.0004056	Up
Galnt17	Oligodendrocyte	1	0.5459	1.537e-11	1.081e-09	Up	0.7516	4.437e-19	3.327e-17	Up	0.1407	0.04618	0.2019	None
Galnt2	Oligodendrocyte	1	0.05094	0.1573	0.3337	None	0.3178	0.0005468	0.004753	Up	0.267	0.002565	0.02191	Up
Galnt5	Oligodendrocyte	1	-0.1249	0.1507	0.3256	None	0.4871	1.427e-05	0.0002065	Up	0.5531	1.679e-08	5.436e-07	Up
Galnt6	Oligodendrocyte	1	-0.1156	0.4571	0.6187	None	0.304	0.01312	0.05758	None	0.4195	5.468e-05	0.0007991	Up
Gamt	Oligodendrocyte	1	0.1483	0.002063	0.01923	Up	0.135	0.0291	0.1014	None	-0.02343	0.3292	0.6388	None
Gapdh	Oligodendrocyte	1	0.4619	6.599e-06	0.0001579	Up	0.1902	0.009427	0.04533	Up	-0.2933	0.004765	0.03615	Down
Garem1	Oligodendrocyte	1	-0.1173	0.2079	0.3925	None	-0.2854	0.001709	0.01208	Down	-0.149	0.01026	0.06587	None
Garnl3	Oligodendrocyte	1	0.5545	2.049e-11	1.426e-09	Up	1.093	1.261e-33	2.117e-31	Up	0.4493	3.397e-08	9.953e-07	Up
Gars	Oligodendrocyte	0	0.05721	0.2583	0.4468	None	0.1465	0.007494	0.03809	Up	0.07768	0.2731	0.5773	None
Gas5	Oligodendrocyte	1	-0.2806	0.01158	0.06651	None	-0.3704	0.002357	0.01561	Down	-0.08641	0.543	0.7981	None
Gas7	Oligodendrocyte	1	-0.331	0.002498	0.0223	Down	-0.3947	0.001606	0.01147	Down	-0.02994	0.8691	0.95	None
Gatad2b	Oligodendrocyte	1	-0.01192	0.9369	0.958	None	0.2211	0.00102	0.008008	Up	0.1933	0.003113	0.02566	Up
Gatm	Oligodendrocyte	1	-0.4109	8.585e-05	0.001456	Down	-0.5238	1.991e-09	5.66e-08	Down	-0.1531	0.01606	0.09338	None
Gca	Oligodendrocyte	0	-0.09528	0.04231	0.1563	None	-0.123	0.009889	0.04697	Down	-0.01432	0.953	0.9851	None
Gcnt7	Oligodendrocyte	1	-0.1667	0.06425	0.1985	None	0.04822	0.6156	0.7163	None	0.2176	0.001873	0.01699	Up
Gdi1	Oligodendrocyte	1	-0.1853	0.07107	0.2102	None	-0.3386	0.0003203	0.00311	Down	-0.121	0.2096	0.5087	None
Gdpd5	Oligodendrocyte	1	-0.0142	0.5891	0.7213	None	0.2405	0.003862	0.02305	Up	0.2467	0.002126	0.01888	Up
Gfod1	Oligodendrocyte	1	-0.02254	0.08155	0.2283	None	0.4096	3.277e-07	6.637e-06	Up	0.4199	2.277e-08	7.005e-07	Up
Gigyf2	Oligodendrocyte	1	-0.09613	0.03194	0.1327	None	0.1171	0.005509	0.0305	Up	0.2023	0.1095	0.3472	None
Gin1	Oligodendrocyte	1	-0.1352	0.05754	0.1856	None	-0.2802	0.000103	0.001163	Down	-0.1419	0.03921	0.1797	None
Git2	Oligodendrocyte	1	0.2275	0.0008242	0.009676	Up	0.413	2.232e-06	3.895e-05	Up	0.1288	0.3968	0.6957	None
Gjb1	Oligodendrocyte	1	-0.2998	0.01285	0.072	None	-0.3697	0.001606	0.01147	Down	-0.06122	0.7275	0.8988	None
Gjc2	Oligodendrocyte	1	-0.443	1.199e-05	0.0002752	Down	-0.3803	0.0003037	0.002982	Down	0.06848	0.6442	0.8579	None
Gjc3	Oligodendrocyte	1	0.03538	0.5493	0.6902	None	-0.676	5.344e-34	9.187e-32	Down	-0.774	4.874e-54	6.596e-51	Down
Gkap1	Oligodendrocyte	1	0.4053	0.007422	0.04922	Up	-0.08343	0.5982	0.704	None	-0.4873	9.451e-06	0.0001679	Down
Glcci1	Oligodendrocyte	0	-0.1604	0.1737	0.3537	None	-0.2731	0.006733	0.03529	Down	-0.1121	0.2926	0.5997	None
Glg1	Oligodendrocyte	0	0.01495	0.06848	0.2057	None	0.1482	0.006373	0.03403	Up	0.1228	0.4298	0.7232	None
Gli2	Oligodendrocyte	1	0.3395	4.086e-06	0.0001037	Up	0.4762	3.709e-10	1.113e-08	Up	0.1343	0.124	0.3751	None
Glmn	Oligodendrocyte	0	0.2393	0.003538	0.02909	Up	0.1111	0.09575	0.224	None	-0.1202	0.2254	0.526	None
Glod4	Oligodendrocyte	1	0.12	0.0003702	0.005173	Up	0.115	9.748e-06	0.0001481	Up	-0.01696	0.8564	0.9457	None
Glp2r	Oligodendrocyte	1	-0.1046	0.1241	0.2902	None	0.03491	0.4529	0.5879	None	0.1617	0.002114	0.01882	Up
Glt8d1	Oligodendrocyte	1	0.4457	4.353e-07	1.373e-05	Up	-0.2499	0.05292	0.1499	None	-0.6722	7.403e-13	4.817e-11	Down
Gltp	Oligodendrocyte	1	-0.2009	0.0004497	0.006042	Down	-0.1859	7.536e-05	0.0009035	Down	0.03104	0.7375	0.9017	None
Glul	Oligodendrocyte	1	0.6172	1.081e-08	4.895e-07	Up	0.362	0.003058	0.01921	Up	-0.2648	0.000859	0.008915	Down
Gm10563	Oligodendrocyte	1	-0.2047	0.002182	0.02012	Down	-0.1069	0.1082	0.2424	None	0.08503	0.2026	0.4991	None
Gm10863	Oligodendrocyte	1	-0.6459	2.066e-08	8.77e-07	Down	-1.129	1.3e-24	1.309e-22	Down	-0.391	9.553e-06	0.0001692	Down
Gm11149	Oligodendrocyte	1	-1.09	6.727e-22	1.465e-19	Down	-0.6132	4.856e-08	1.104e-06	Down	0.4389	1.44e-05	0.0002429	Up
Gm11437	Oligodendrocyte	1	0.3888	7.716e-06	0.0001827	Up	0.9565	1.365e-22	1.25e-20	Up	0.5064	2.243e-08	6.93e-07	Up
Gm11659	Oligodendrocyte	1	-0.9319	2.352e-15	2.561e-13	Down	-0.3969	0.002003	0.01378	Down	0.5537	3.224e-08	9.526e-07	Up
Gm12145	Oligodendrocyte	0	-0.2043	0.07661	0.2198	None	-0.2734	0.007044	0.03648	Down	-0.09476	0.3277	0.6373	None
Gm12227	Oligodendrocyte	1	-0.2709	0.0001989	0.003079	Down	-0.2402	0.0008108	0.006631	Down	0.02414	0.4959	0.766	None
Gm12324	Oligodendrocyte	1	-0.07768	0.4117	0.5838	None	-0.4872	1.421e-05	0.0002061	Down	-0.4291	1.717e-05	0.0002854	Down
Gm12353	Oligodendrocyte	1	-0.4366	0.002223	0.02036	Down	-0.5958	8.494e-06	0.0001325	Down	-0.1476	0.2942	0.6012	None
Gm12828	Oligodendrocyte	1	-0.3168	0.0001858	0.002889	Down	-0.3212	0.0002823	0.002803	Down	0.02759	0.7916	0.9233	None
Gm13402	Oligodendrocyte	1	-0.3121	0.0001062	0.001774	Down	-0.1663	0.1171	0.2547	None	0.1753	0.009574	0.06218	None
Gm13403	Oligodendrocyte	1	0.3132	1.442e-05	0.0003245	Up	0.05715	0.314	0.469	None	-0.2712	3.377e-05	0.0005146	Down
Gm13905	Oligodendrocyte	1	-0.6003	2.412e-06	6.487e-05	Down	-0.7863	3.339e-09	9.122e-08	Down	-0.1911	0.04741	0.205	None
Gm13919	Oligodendrocyte	1	-0.3723	0.001143	0.01227	Down	-0.394	0.0007598	0.006301	Down	-0.003416	0.9385	0.9798	None
Gm13963	Oligodendrocyte	1	0.1726	0.07847	0.2226	None	0.2747	0.001247	0.009389	Up	0.06324	0.3573	0.6626	None
Gm14798	Oligodendrocyte	1	-0.1793	0.002872	0.02485	Down	-0.03211	0.13	0.2709	None	0.1238	0.06608	0.2552	None
Gm15478	Oligodendrocyte	1	-0.4624	0.0004521	0.006042	Down	-0.3328	0.011	0.05059	None	0.1161	0.4674	0.7496	None
Gm15563	Oligodendrocyte	1	-0.2048	0.006175	0.04284	Down	-0.2213	0.001388	0.01029	Down	-0.001053	0.697	0.8812	None
Gm15738	Oligodendrocyte	1	-0.02871	0.8726	0.9146	None	0.3588	6.38e-05	0.0007795	Up	0.3645	3.336e-06	6.396e-05	Up
Gm15764	Oligodendrocyte	1	-0.2054	0.0003743	0.005208	Down	-0.04706	0.108	0.2422	None	0.1596	0.006016	0.0429	Up
Gm15886	Oligodendrocyte	1	0.2998	0.0007434	0.008929	Up	0.3593	3.722e-06	6.203e-05	Up	0.04644	0.2702	0.5746	None
Gm16000	Oligodendrocyte	1	0.05321	0.5129	0.664	None	0.1715	0.009738	0.04632	Up	0.1283	0.03034	0.1501	None
Gm16093	Oligodendrocyte	0	-0.09844	0.1205	0.2854	None	-0.1908	0.01031	0.04833	Down	-0.07251	0.1606	0.4394	None
Gm16126	Oligodendrocyte	1	0.1848	0.002276	0.02076	Up	0.3524	8.652e-09	2.234e-07	Up	0.1527	0.00997	0.06432	None
Gm16189	Oligodendrocyte	1	-0.2437	0.0009689	0.01085	Down	-0.05619	0.4933	0.6203	None	0.1627	0.008677	0.05751	None
Gm16212	Oligodendrocyte	0	0.2016	0.005926	0.04184	Up	0.1678	0.03328	0.1105	None	-0.02945	0.8442	0.9419	None
Gm16279	Oligodendrocyte	0	-0.08806	0.3257	0.5109	None	-0.2073	0.002687	0.01725	Down	-0.08945	0.1703	0.4528	None
Gm16638	Oligodendrocyte	1	0.05567	0.3621	0.5442	None	-0.1405	0.0165	0.06763	None	-0.1838	0.0001419	0.001886	Down
Gm17227	Oligodendrocyte	1	-0.06031	0.01487	0.07962	None	0.257	2.452e-05	0.0003356	Up	0.3038	1.881e-05	0.0003082	Up
Gm19500	Oligodendrocyte	1	0.2127	0.03985	0.1506	None	0.7781	3.504e-15	1.739e-13	Up	0.5164	6.884e-09	2.386e-07	Up
Gm19522	Oligodendrocyte	1	-0.1263	0.4208	0.5911	None	-0.6971	5.852e-08	1.314e-06	Down	-0.5546	2.639e-07	6.31e-06	Down
Gm19705	Oligodendrocyte	1	0.08741	0.08257	0.2297	None	0.197	0.0008094	0.006626	Up	0.09906	0.1921	0.484	None
Gm20275	Oligodendrocyte	1	-0.6139	1.144e-06	3.328e-05	Down	-0.3777	0.01337	0.05807	None	0.2541	0.009755	0.06323	None
Gm20319	Oligodendrocyte	1	-0.2486	0.000375	0.005208	Down	-0.2339	0.002265	0.01512	Down	0.03776	0.2134	0.5129	None
Gm20404	Oligodendrocyte	1	-0.3027	0.005283	0.03906	Down	0.02204	0.118	0.2559	None	0.3282	0.0001467	0.001939	Up
Gm22146	Oligodendrocyte	1	0.3206	4.869e-07	1.507e-05	Up	0.5547	4.378e-16	2.489e-14	Up	0.2102	0.001	0.01016	Up
Gm26672	Oligodendrocyte	1	-0.2307	0.007414	0.04922	Down	-0.1756	0.01066	0.04932	Down	0.04471	0.1219	0.3706	None
Gm26673	Oligodendrocyte	1	-0.2217	0.0003641	0.00512	Down	0.007938	0.01112	0.05089	None	0.2418	0.0005843	0.006472	Up
Gm26930	Oligodendrocyte	1	-0.0911	0.02969	0.1266	None	-0.1609	0.002881	0.01829	Down	-0.06115	0.2919	0.5991	None
Gm26936	Oligodendrocyte	1	-1.066	4.498e-20	7.785e-18	Down	-0.944	6.366e-16	3.59e-14	Down	0.1508	0.2972	0.6056	None
Gm26944	Oligodendrocyte	1	-0.1335	0.007675	0.05064	None	-0.2374	0.0002126	0.002191	Down	-0.08025	0.07402	0.2739	None
Gm26979	Oligodendrocyte	1	-0.4267	5.783e-09	2.769e-07	Down	-0.2034	0.02735	0.09728	None	0.2337	0.0001945	0.002497	Up
Gm27153	Oligodendrocyte	1	-0.1913	0.03379	0.1366	None	0.1253	0.256	0.4127	None	0.3167	1.188e-05	0.0002051	Up
Gm28322	Oligodendrocyte	1	-0.1661	0.04909	0.1697	None	-0.2458	0.001085	0.008417	Down	-0.0715	0.2271	0.5285	None
Gm28375	Oligodendrocyte	0	-0.3029	0.006125	0.04271	Down	-0.1689	0.3585	0.5074	None	0.1488	0.06415	0.2517	None
Gm28376	Oligodendrocyte	1	-0.3453	0.002796	0.02445	Down	-0.2086	0.1294	0.2699	None	0.07752	0.0005553	0.00619	None
Gm28501	Oligodendrocyte	1	-0.17	0.04244	0.1563	None	0.1465	0.004923	0.02796	Up	0.3021	8.704e-06	0.0001556	Up
Gm28609	Oligodendrocyte	1	-0.2753	0.009523	0.0586	None	0.1376	0.1264	0.2671	None	0.4028	1.374e-05	0.0002325	Up
Gm29114	Oligodendrocyte	1	-0.2119	0.002468	0.02207	Down	-0.1063	0.2023	0.3556	None	0.09954	0.1282	0.3831	None
Gm29237	Oligodendrocyte	1	-0.3259	9.412e-08	3.361e-06	Down	-0.1381	0.06821	0.1789	None	0.2187	4.27e-05	0.0006375	Up
Gm31323	Oligodendrocyte	1	-0.1797	0.004186	0.03293	Down	-0.1401	0.02537	0.0921	None	0.05302	0.55	0.8022	None
Gm32036	Oligodendrocyte	1	-0.4275	0.001188	0.01269	Down	-0.8524	1.662e-11	5.798e-10	Down	-0.4543	4.277e-05	0.0006375	Down
Gm32122	Oligodendrocyte	1	-0.04995	0.5269	0.6754	None	-0.1872	4.131e-05	0.0005342	Down				None
Gm33255	Oligodendrocyte	1	-0.1614	0.02337	0.1081	None	-0.2757	0.0005025	0.004458	Down	-0.07978	0.0253	0.1315	None
Gm35188	Oligodendrocyte	1	-0.385	0.0004324	0.005874	Down	-0.2874	0.0819	0.2027	None	0.08152	0.002672	0.02269	None
Gm36855	Oligodendrocyte	1	0.2037	0.1848	0.366	None	0.5037	7.319e-05	0.0008834	Up	0.2492	0.0197	0.1082	None
Gm36975	Oligodendrocyte	1	-0.2759	0.07379	0.2145	None	0.03476	0.5975	0.7039	None	0.3368	0.00273	0.02304	Up
Gm37240	Oligodendrocyte	1	-0.3666	0.00381	0.03076	Down	-0.2301	0.09682	0.2255	None	0.1562	0.01058	0.06738	None
Gm37459	Oligodendrocyte	1	-0.6801	1.116e-19	1.837e-17	Down	-0.4878	1.796e-07	3.714e-06	Down	0.1973	3.205e-05	0.0004896	Up
Gm37768	Oligodendrocyte	1	-0.2168	0.002517	0.02244	Down	-0.06797	0.2139	0.3679	None	0.1265	0.05144	0.2162	None
Gm38304	Oligodendrocyte	1	-0.4818	2.624e-06	7e-05	Down	-0.2518	0.03618	0.1166	None	0.2282	0.00967	0.06274	None
Gm38604	Oligodendrocyte	1	-0.2584	0.001603	0.01608	Down	-0.2182	0.007213	0.03716	Down	0.06581	0.5276	0.7859	None
Gm38948	Oligodendrocyte	0	-0.1335	0.04969	0.1707	None	-0.1849	0.004441	0.02576	Down	-0.05639	0.4953	0.766	None
Gm39214	Oligodendrocyte	1	-0.2305	0.01065	0.06297	None	-0.3058	0.0001772	0.001873	Down	-0.0562	0.5355	0.7916	None
Gm40578	Oligodendrocyte	1	0.5026	3.718e-08	1.468e-06	Up	0.01125	0.1482	0.2937	None	-0.5366	4.624e-09	1.647e-07	Down
Gm4221	Oligodendrocyte	1	-0.214	0.04615	0.1634	None	-0.3316	0.001141	0.008733	Down	-0.07626	0.4032	0.7019	None
Gm42372	Oligodendrocyte	1	0.09515	0.005738	0.04099	None	0.1697	0.007886	0.03968	Up	0.08022	0.02718	0.1384	None
Gm42413	Oligodendrocyte	1	-0.8261	1.024e-14	1.032e-12	Down	-0.7142	3.911e-09	1.056e-07	Down	0.1459	0.08655	0.3022	None
Gm42439	Oligodendrocyte	1	-0.8096	1.126e-13	9.386e-12	Down	-0.6584	6.317e-09	1.674e-07	Down	0.1526	0.1754	0.46	None
Gm42495	Oligodendrocyte	1	0.03343	0.5802	0.7149	None	-0.1125	0.07342	0.1879	None	-0.1387	0.00352	0.02821	Down
Gm4258	Oligodendrocyte	1	-0.4723	1.869e-05	0.0004005	Down	-0.5194	2.013e-09	5.677e-08	Down	-0.07173	0.056	0.2295	None
Gm42726	Oligodendrocyte	1	-0.1846	0.008208	0.05307	None	-0.2077	0.00207	0.01409	Down	0.002818	0.9399	0.9798	None
Gm42756	Oligodendrocyte	1	0.02013	0.6028	0.7317	None	0.3123	0.0005719	0.004947	Up	0.2731	0.001095	0.01096	Up
Gm43376	Oligodendrocyte	1	-0.5944	5.578e-08	2.115e-06	Down	-0.4274	5.137e-05	0.000649	Down	0.1682	0.06088	0.2432	None
Gm43915	Oligodendrocyte	1	-0.2775	1.683e-05	0.0003641	Down	-0.2211	0.00228	0.01521	Down	0.08373	0.1866	0.476	None
Gm44686	Oligodendrocyte	0	-0.1983	0.04039	0.1519	None	0.008347	0.9006	0.9273	None	0.2352	0.005476	0.04006	Up
Gm45356	Oligodendrocyte	1	0.2049	0.005144	0.03837	Up	0.2336	0.001829	0.01279	Up	0.02248	0.9123	0.9684	None
Gm45767	Oligodendrocyte	1	-0.2669	1.747e-05	0.0003767	Down	-0.1874	0.005932	0.03199	Down	0.07449	0.224	0.5254	None
Gm46218	Oligodendrocyte	1	-0.1847	0.06235	0.195	None	-0.2907	0.0002599	0.002599	Down	-0.07275	0.2221	0.5235	None
Gm46367	Oligodendrocyte	1	-0.39	0.0009205	0.01053	Down	-0.2667	0.00555	0.0306	Down	0.1097	0.2477	0.5535	None
Gm46440	Oligodendrocyte	1	-0.1657	0.0008929	0.01029	Down	-0.1709	0.002442	0.01612	Down				None
Gm47167	Oligodendrocyte	1	-0.3287	0.002651	0.02339	Down	-0.1876	0.03772	0.1195	None	0.1688	0.008002	0.05377	None
Gm47271	Oligodendrocyte	1	-0.09086	0.6046	0.7331	None	0.4814	4.253e-05	0.000549	Up	0.547	9.54e-09	3.244e-07	Up
Gm47283	Oligodendrocyte	1	-0.4789	3.52e-05	0.0006956	Down	0.5549	1.047e-10	3.34e-09	Up	1.038	5.584e-32	1.574e-29	Up
Gm48091	Oligodendrocyte	1	-0.1575	0.02694	0.1192	None	0.02983	0.5947	0.7019	None	0.1974	0.00187	0.01699	Up
Gm48250	Oligodendrocyte	1	-0.1259	0.1702	0.3498	None	0.0717	0.2837	0.442	None	0.2021	0.002125	0.01888	Up
Gm48383	Oligodendrocyte	1	-0.3129	0.0001387	0.002219	Down	-0.2614	0.003601	0.02192	Down	0.04948	0.6304	0.8496	None
Gm48512	Oligodendrocyte	1	-0.3647	0.01051	0.06257	None	-0.711	2.168e-08	5.181e-07	Down	-0.3407	0.002594	0.02211	Down
Gm48678	Oligodendrocyte	1	-0.1101	0.2936	0.4807	None	0.3763	0.0004136	0.003831	Up	0.5096	6.718e-10	2.952e-08	Up
Gm48765	Oligodendrocyte	1	-0.2444	0.004771	0.03598	Down	-0.1559	0.003134	0.01966	Down	0.07955	0.07943	0.2857	None
Gm49003	Oligodendrocyte	0	-0.06341	0.6841	0.7878	None	-0.2383	0.007347	0.03764	Down	-0.1571	0.05512	0.2268	None
Gm49130	Oligodendrocyte	1	-0.02571	0.2799	0.4679	None	-0.13	0.01041	0.04868	Down				None
Gm49226	Oligodendrocyte	1	-0.24	0.0003682	0.005159	Down	-0.04924	0.03914	0.123	None	0.1915	0.004816	0.03649	Up
Gm4924	Oligodendrocyte	0	0.05694	0.1523	0.3276	None	0.1407	0.006745	0.03532	Up	0.08855	0.2578	0.5609	None
Gm50323	Oligodendrocyte	1	-0.00531	0.9469	0.964	None	-0.2632	0.01873	0.07431	None	-0.2509	0.003909	0.03072	Down
Gm5535	Oligodendrocyte	1	0.1283	3.575e-06	9.209e-05	Up	0.299	1.133e-08	2.847e-07	Up	0.1695	0.07972	0.2863	None
Gm5820	Oligodendrocyte	1	-0.04129	0.683	0.7872	None	0.3464	8.567e-05	0.001004	Up	0.368	2.2e-07	5.375e-06	Up
Gm6994	Oligodendrocyte	1	-0.2925	0.006021	0.04225	Down	-0.3089	0.003675	0.02214	Down	-0.03953	0.8633	0.9479	None
Gm7580	Oligodendrocyte	1	-0.2799	0.0003626	0.00511	Down	-0.152	0.01069	0.04937	Down	0.1272	0.03327	0.16	None
Gm816	Oligodendrocyte	1	0.3602	1.048e-06	3.063e-05	Up	0.8641	9.297e-26	9.93e-24	Up	0.4469	1.218e-09	5.005e-08	Up
Gm9895	Oligodendrocyte	1	0.8405	4.133e-16	4.81e-14	Up	0.9565	1.426e-18	1.026e-16	Up	0.05215	0.8153	0.9304	None
Gmds	Oligodendrocyte	1	-0.2802	0.02377	0.1091	None	-0.4308	0.0002232	0.002267	Down	-0.1065	0.3748	0.6797	None
Gna12	Oligodendrocyte	1	-0.2984	0.01221	0.06913	None	-0.2163	7.415e-05	0.0008919	Down	0.1064	0.09266	0.3141	None
Gnai1	Oligodendrocyte	1	-0.09513	0.7652	0.842	None	-0.2987	0.005755	0.03134	Down	-0.1968	0.007044	0.0488	Down
Gnao1	Oligodendrocyte	1	-0.09216	0.1043	0.263	None	0.1756	0.002289	0.01524	Up	0.2834	1.472e-09	5.929e-08	Up
Gnb2	Oligodendrocyte	1	-0.1588	0.03642	0.1426	None	-0.2728	9.291e-05	0.001072	Down	-0.1207	0.09403	0.3175	None
Gng12	Oligodendrocyte	1	0.2044	0.01144	0.06621	None	0.4752	4.068e-06	6.747e-05	Up	0.2357	0.0701	0.2653	None
Gnl3	Oligodendrocyte	1	0.2079	0.01761	0.08961	None	0.2295	0.00208	0.01409	Up	-0.00819	0.6918	0.879	None
Gnptg	Oligodendrocyte	1	-0.09655	0.3778	0.5579	None	-0.2731	0.0003413	0.003277	Down	-0.1671	0.01097	0.06925	None
Golgb1	Oligodendrocyte	1	0.2137	0.005785	0.04116	Up	-0.06797	0.05418	0.1523	None	-0.2553	0.01753	0.0995	None
Gon4l	Oligodendrocyte	1	-0.1476	0.03653	0.1429	None	-0.3563	0.0005879	0.005066	Down	-0.2085	0.01647	0.09515	None
Gpatch8	Oligodendrocyte	1	0.4654	2.281e-08	9.564e-07	Up	0.2042	0.001129	0.008667	Up	-0.2367	0.01734	0.09876	None
Gpd1	Oligodendrocyte	1	0.754	5.341e-15	5.634e-13	Up	0.3286	0.001795	0.01259	Up	-0.4452	1.592e-08	5.178e-07	Down
Gpd2	Oligodendrocyte	1	0.02051	0.8517	0.9016	None	-0.4174	4.645e-05	0.0005949	Down	-0.3897	5.582e-07	1.238e-05	Down
Gphn	Oligodendrocyte	1	-0.1647	0.2139	0.3986	None	-0.2315	0.005007	0.02839	Down	-0.07797	0.02153	0.1162	None
Gpm6a	Oligodendrocyte	1	0.01089	0.678	0.7837	None	-0.2984	1.476e-07	3.123e-06	Down	-0.3268	1.967e-11	1.065e-09	Down
Gpm6b	Oligodendrocyte	1	-0.5719	7.919e-23	1.843e-20	Down	-0.839	1.115e-54	5.238e-52	Down	-0.3743	2.031e-12	1.261e-10	Down
Gpr137c	Oligodendrocyte	0	0.22	0.06893	0.2064	None	0.3361	0.004098	0.02416	Up	0.1257	0.3436	0.6506	None
Gpr158	Oligodendrocyte	1	0.6264	3.284e-14	3.079e-12	Up	1.055	1.161e-29	1.574e-27	Up	0.3586	0.000143	0.001897	Up
Gpr18	Oligodendrocyte	1	-0.1433	0.009087	0.05674	None	0.03922	0.5205	0.6416	None	0.1861	0.0001817	0.002351	Up
Gpr37	Oligodendrocyte	1	-0.5421	4.057e-06	0.0001033	Down	-0.07724	0.1866	0.3392	None	0.4606	3.157e-06	6.069e-05	Up
Gpr62	Oligodendrocyte	1	-0.1776	0.003847	0.03096	Down	0.01586	0.1019	0.2338	None	0.1926	0.005523	0.04025	Up
Gprc5b	Oligodendrocyte	1	-0.7755	1.647e-10	1.011e-08	Down	-0.3962	0.0003646	0.003469	Down	0.3547	0.001592	0.0149	Up
Gpsm1	Oligodendrocyte	1	0.06098	0.0177	0.08988	None	0.5012	5.462e-11	1.825e-09	Up	0.3979	1.149e-07	3.013e-06	Up
Gpt2	Oligodendrocyte	1	0.2589	0.000699	0.008516	Up	0.3503	3.236e-05	0.0004312	Up	0.07959	0.5382	0.7938	None
Gramd1b	Oligodendrocyte	1	-0.2744	0.004251	0.03328	Down	-0.2624	0.002852	0.01816	Down	0.01637	0.9698	0.9891	None
Grb2	Oligodendrocyte	1	-0.04969	0.05293	0.1771	None	-0.1663	0.003512	0.02157	Down	-0.1069	0.2873	0.5935	None
Grhpr	Oligodendrocyte	1	0.1148	0.0448	0.1607	None	0.217	0.000739	0.006136	Up	0.1007	0.193	0.4847	None
Gria4	Oligodendrocyte	1	-0.5818	2.978e-06	7.792e-05	Down	-0.229	0.1592	0.3069	None	0.3624	0.000159	0.002097	Up
Grid2	Oligodendrocyte	1	-0.3899	2.379e-05	0.0004971	Down	-0.4509	1.103e-08	2.786e-07	Down	-0.07511	0.253	0.5576	None
Grik1	Oligodendrocyte	1	-0.1809	0.1563	0.3323	None	-0.3691	0.0001377	0.001512	Down	-0.1464	0.07418	0.2743	None
Grik2	Oligodendrocyte	1	-0.3998	0.006741	0.0459	Down	-0.6251	1.771e-08	4.29e-07	Down	-0.2653	0.0003366	0.003969	Down
Grik4	Oligodendrocyte	1	-0.3179	0.0004512	0.006042	Down	0.124	0.03821	0.1208	None	0.431	3.711e-10	1.72e-08	Up
Grk4	Oligodendrocyte	0	0.1027	0.126	0.2934	None	0.1839	0.007692	0.03892	Up	0.06382	0.6139	0.839	None
Grm3	Oligodendrocyte	1	-0.3994	4.643e-05	0.0008706	Down	-0.3285	5.933e-05	0.0007353	Down	0.05451	0.6129	0.8387	None
Grm7	Oligodendrocyte	1	-0.004337	0.2393	0.4272	None	0.9892	5.258e-11	1.773e-09	Up	1.016	1.95e-16	1.912e-14	Up
Gse1	Oligodendrocyte	1	-0.547	9.082e-08	3.261e-06	Down	0.09062	0.5141	0.637	None	0.6181	3.706e-13	2.559e-11	Up
Gsk3a	Oligodendrocyte	1	-0.06123	0.2931	0.4804	None	-0.1876	0.004358	0.02539	Down	-0.126	0.03826	0.1765	None
Gspt1	Oligodendrocyte	1	0.1597	0.003249	0.02735	Up	0.07035	0.0233	0.08653	None	-0.04731	0.4996	0.7677	None
Gstp1	Oligodendrocyte	1	0.1944	0.0007239	0.008741	Up	0.2821	5.308e-05	0.0006681	Up	0.08449	0.02902	0.1452	None
Gtdc1	Oligodendrocyte	1	-0.002788	0.4045	0.5783	None	0.4233	0.0005021	0.004458	Up	0.4255	2.946e-05	0.0004531	Up
Gtf2f2	Oligodendrocyte	1	-0.2694	0.008585	0.05472	None	-0.219	0.008218	0.04097	Down	0.04485	0.4469	0.7386	None
Gtf2i	Oligodendrocyte	1	0.00273	0.02237	0.1047	None	0.485	3.653e-07	7.335e-06	Up	0.4913	1.07e-05	0.0001881	Up
Gtpbp2	Oligodendrocyte	1	-0.1203	0.02492	0.113	None	-0.1783	0.001339	0.009979	Down	-0.03271	0.8845	0.9551	None
H2-Ke6	Oligodendrocyte	1	-0.1689	0.01528	0.08127	None	-0.3059	9.129e-07	1.725e-05	Down	-0.1263	0.02541	0.1319	None
H3f3b	Oligodendrocyte	1	-0.2796	0.03656	0.1429	None	-0.4299	0.0004956	0.004422	Down	-0.1557	0.2196	0.5196	None
Hapln2	Oligodendrocyte	1	0.1168	0.05405	0.1788	None	-0.1991	0.09111	0.2164	None	-0.3606	9.974e-08	2.668e-06	Down
Haus3	Oligodendrocyte	1	0.1803	0.008246	0.05321	None	-0.01089	0.9737	0.9802	None	-0.1869	0.0007033	0.007494	Down
Hcn2	Oligodendrocyte	1	0.3993	1.587e-05	0.0003479	Up	-0.00829	0.2882	0.4459	None	-0.4602	1.698e-06	3.45e-05	Down
Hdac4	Oligodendrocyte	1	0.007125	0.148	0.3233	None	-0.3678	1.148e-06	2.107e-05	Down	-0.3638	4.172e-08	1.181e-06	Down
Hdac7	Oligodendrocyte	1	0.07819	0.3833	0.5625	None	0.2923	0.002485	0.01633	Up	0.2035	0.02504	0.131	None
Hdac9	Oligodendrocyte	1	-0.08277	0.05045	0.1723	None	-0.2874	0.0009663	0.007645	Down	-0.1723	0.004112	0.0321	Down
Hdgfl2	Oligodendrocyte	1	0.1479	0.02546	0.1149	None	0.4347	8.721e-08	1.909e-06	Up	0.2519	0.002256	0.01982	Up
Hdlbp	Oligodendrocyte	1	0.04523	0.3416	0.5251	None	-0.2505	0.0142	0.06052	None	-0.2879	0.0005114	0.005729	Down
Hectd1	Oligodendrocyte	1	0.138	0.008655	0.05501	None	0.232	0.000977	0.007695	Up	0.09774	0.551	0.8022	None
Hecw2	Oligodendrocyte	1	-0.1815	0.005433	0.03958	Down	-0.008833	0.9801	0.9856	None	0.1654	0.001098	0.01097	Up
Heg1	Oligodendrocyte	1	-0.3631	0.002315	0.02101	Down	0.08241	0.00376	0.02254	None	0.4234	0.0001721	0.002243	Up
Hepacam	Oligodendrocyte	1	0.2091	0.0001198	0.001943	Up	0.3255	2.524e-05	0.0003422	Up	0.1067	0.4663	0.7496	None
Herc1	Oligodendrocyte	1	0.2726	0.00368	0.02993	Up	0.2596	0.03538	0.1149	None	-0.03697	0.2575	0.5608	None
Herpud1	Oligodendrocyte	1	0.2949	0.0006973	0.008512	Up	0.3725	6.263e-05	0.0007665	Up	0.04534	0.7336	0.9013	None
Hexb	Oligodendrocyte	1	0.1508	0.05996	0.1904	None	0.3038	3.189e-05	0.0004258	Up	0.1486	0.04381	0.1943	None
Hhip	Oligodendrocyte	1	-0.441	1.889e-05	0.0004021	Down	-0.5523	4.384e-08	1.01e-06	Down	-0.09769	0.3684	0.6758	None
Hibadh	Oligodendrocyte	0	-0.2488	0.01894	0.09477	None	-0.2784	0.00714	0.03682	Down	-0.002076	0.5665	0.8122	None
Hif3a	Oligodendrocyte	1	0.2586	0.003244	0.02735	Up	0.4639	6.173e-08	1.378e-06	Up	0.2091	0.01337	0.08083	None
Higd1a	Oligodendrocyte	0	0.2008	0.005635	0.04046	Up	0.1108	0.09587	0.2242	None	-0.1014	0.2651	0.5687	None
Hint1	Oligodendrocyte	1	0.2632	0.0006781	0.008322	Up	0.03108	0.118	0.2559	None	-0.2344	0.005785	0.0416	Down
Hipk1	Oligodendrocyte	1	0.3156	6.605e-05	0.001155	Up	0.4922	1.758e-09	5.017e-08	Up	0.1584	0.111	0.35	None
Hipk2	Oligodendrocyte	1	-0.3153	0.02771	0.1214	None	0.02324	0.041	0.1267	None	0.3304	5.674e-06	0.0001052	Up
Hipk3	Oligodendrocyte	1	0.07246	0.5904	0.7221	None	0.3344	0.0001706	0.001819	Up	0.2204	0.008948	0.05884	None
Hivep2	Oligodendrocyte	1	0.1798	0.04517	0.1617	None	0.4698	2.851e-08	6.676e-07	Up	0.3315	2.849e-05	0.0004412	Up
Hltf	Oligodendrocyte	1	-0.03539	0.851	0.9013	None	-0.31	0.00361	0.02195	Down	-0.2742	0.003435	0.02771	Down
Hmg20b	Oligodendrocyte	1	0.01263	0.134	0.3044	None	-0.1566	0.001185	0.009009	Down	-0.1637	0.003192	0.02615	Down
Hmgcl	Oligodendrocyte	1	-0.209	0.04296	0.1573	None	-0.4576	1.295e-05	0.0001901	Down	-0.2136	0.01066	0.06777	None
Hmgcs1	Oligodendrocyte	1	-0.2237	0.006678	0.04558	Down	-0.2896	0.001214	0.009205	Down	-0.04546	0.7797	0.9182	None
Hmgn3	Oligodendrocyte	1	-0.04198	0.8063	0.87	None	-0.2758	0.0007186	0.005987	Down	-0.2051	0.005189	0.03858	Down
Hmox2	Oligodendrocyte	1	0.1488	0.000812	0.009549	Up	0.2601	0.0001055	0.001186	Up	0.1135	0.5073	0.7741	None
Hnrnpa2b1	Oligodendrocyte	1	0.2002	5.919e-08	2.22e-06	Up	-0.2853	0.002341	0.01554	Down	-0.4641	6.524e-21	1.027e-18	Down
Hnrnpc	Oligodendrocyte	1	0.02686	0.02168	0.1032	None	0.2692	5.816e-05	0.0007231	Up	0.2214	0.03569	0.1682	None
Hnrnph1	Oligodendrocyte	0	-0.361	0.003325	0.02771	Down	-0.1723	0.2903	0.4473	None	0.1808	0.1324	0.3894	None
Hnrnpl	Oligodendrocyte	1	0.2363	0.01337	0.07384	None	0.266	0.002355	0.01561	Up	0.03594	0.7996	0.9261	None
Hp1bp3	Oligodendrocyte	1	0.006686	0.1337	0.3039	None	0.2001	0.001951	0.0135	Up	0.1747	0.0447	0.1972	None
Hps4	Oligodendrocyte	1	0.05031	0.004017	0.03183	None	-0.06555	0.3772	0.5241	None	-0.1239	0.004306	0.03322	Down
Hs3st1	Oligodendrocyte	1	-0.3069	0.0005582	0.007112	Down	-0.2715	0.003807	0.0228	Down	0.04771	0.757	0.9105	None
Hsp90aa1	Oligodendrocyte	1	0.6285	1.765e-08	7.588e-07	Up	0.4344	1.361e-06	2.473e-05	Up	-0.2044	0.1147	0.3573	None
Hsp90ab1	Oligodendrocyte	1	1.164	4.972e-23	1.198e-20	Up	0.305	1.645e-07	3.43e-06	Up	-0.8304	1.32e-13	9.606e-12	Down
Hsp90b1	Oligodendrocyte	1	-0.2081	0.1551	0.3307	None	-0.8551	6.559e-15	3.167e-13	Down	-0.621	4.52e-13	3.058e-11	Down
Hspa4	Oligodendrocyte	1	0.3903	3.523e-05	0.0006956	Up	0.2947	0.0003301	0.003187	Up	-0.0947	0.5481	0.8018	None
Hspa4l	Oligodendrocyte	1	0.04774	0.6597	0.7728	None	-0.1431	0.04467	0.1335	None	-0.1941	0.00352	0.02821	Down
Hspa5	Oligodendrocyte	1	-0.08804	0.6775	0.7837	None	-0.9969	5.972e-27	6.789e-25	Down	-0.9025	2.076e-32	6.386e-30	Down
Hspa8	Oligodendrocyte	1	0.5223	4.067e-08	1.587e-06	Up	-0.3918	0.0008446	0.006847	Down	-0.9123	1.345e-19	1.896e-17	Down
Hspa9	Oligodendrocyte	1	0.231	0.006007	0.04219	Up	0.1179	0.01124	0.05109	None	-0.1127	0.09069	0.3107	None
Hspd1	Oligodendrocyte	1	0.2111	0.006133	0.04272	Up	0.08316	0.298	0.4538	None	-0.1304	0.02686	0.1375	None
Hsph1	Oligodendrocyte	1	0.482	1.913e-10	1.163e-08	Up	0.5662	3.335e-13	1.367e-11	Up	0.05194	0.6057	0.8343	None
Htra1	Oligodendrocyte	1	0.4758	6.215e-06	0.0001493	Up	1.063	1.369e-24	1.359e-22	Up	0.5805	1.314e-10	6.634e-09	Up
Ifi27	Oligodendrocyte	1	-0.252	0.02852	0.1233	None	-0.6921	6.529e-14	2.895e-12	Down	-0.3867	1.169e-07	3.048e-06	Down
Ifrd1	Oligodendrocyte	1	0.4529	5.761e-07	1.752e-05	Up	0.3703	8.572e-05	0.001004	Up	-0.1055	0.2228	0.5238	None
Ift43	Oligodendrocyte	1	0.2485	0.03484	0.139	None	0.2336	0.0002182	0.002232	Up	-0.0113	0.1672	0.4491	None
Ift46	Oligodendrocyte	1	-0.06285	0.2662	0.4545	None	-0.1376	0.004742	0.02715	Down	-0.06735	0.1963	0.4892	None
Igf1r	Oligodendrocyte	1	-0.01793	0.4978	0.6535	None	-0.6514	1.153e-06	2.11e-05	Down	-0.6233	2.617e-09	1.001e-07	Down
Igsf11	Oligodendrocyte	1	-0.4823	0.0006682	0.00826	Down	-0.8741	5.611e-14	2.535e-12	Down	-0.4135	8.287e-06	0.0001491	Down
Ikzf2	Oligodendrocyte	1	0.2637	0.0004677	0.006202	Up	0.4006	1.649e-06	2.966e-05	Up	0.1048	0.4905	0.7627	None
Il18	Oligodendrocyte	1	0.05068	0.1146	0.2767	None	0.3573	8.825e-06	0.0001365	Up	0.2935	0.003526	0.02821	Up
Il1rap	Oligodendrocyte	1	-0.3325	0.01463	0.07859	None	-0.09007	0.2822	0.4406	None	0.2177	0.002194	0.01941	Up
Il1rapl1	Oligodendrocyte	1	-0.08138	0.6291	0.7504	None	0.321	0.03298	0.1101	None	0.4093	0.0003064	0.003676	Up
Il33	Oligodendrocyte	1	-0.0632	0.868	0.9119	None	0.3108	0.03173	0.1075	None	0.3575	0.001806	0.01653	Up
Ilk	Oligodendrocyte	1	-0.05075	0.1029	0.261	None	-0.1747	0.01073	0.0495	Down	-0.1	0.1041	0.3358	None
Inf2	Oligodendrocyte	1	0.1397	0.02599	0.1166	None	0.4344	2.322e-05	0.0003216	Up	0.2522	0.05424	0.2239	None
Inpp5f	Oligodendrocyte	1	-0.2325	0.1847	0.3659	None	-0.8879	3.915e-11	1.346e-09	Down	-0.6914	5.368e-10	2.39e-08	Down
Inpp5j	Oligodendrocyte	1	0.2012	0.04628	0.1636	None	0.2767	0.0009727	0.007678	Up	0.07934	0.287	0.5934	None
Insc	Oligodendrocyte	1	-0.2266	0.1179	0.2817	None	-0.3674	0.004382	0.02548	Down	-0.1141	0.05564	0.2286	None
Insyn2a	Oligodendrocyte	1	-0.4374	0.0001821	0.002839	Down	-0.3678	0.00165	0.01173	Down	0.05783	0.7965	0.9261	None
Ints2	Oligodendrocyte	1	0.1471	0.004023	0.03183	Up	0.02905	0.5413	0.6595	None	-0.1173	0.02134	0.1154	None
Ipo13	Oligodendrocyte	1	-0.2602	6.285e-05	0.001113	Down	-0.04519	0.05415	0.1523	None	0.2386	0.0003284	0.003899	Up
Ipp	Oligodendrocyte	1	0.1609	0.003265	0.02744	Up	0.1141	0.01933	0.07597	None	-0.05648	0.5109	0.7758	None
Iqcb1	Oligodendrocyte	1	-0.2307	0.005373	0.03946	Down	-0.2562	0.0003289	0.00318	Down	0.02292	0.4828	0.7593	None
Iqsec1	Oligodendrocyte	1	-0.03764	0.9563	0.9704	None	0.6227	6.177e-08	1.378e-06	Up	0.6659	2.004e-11	1.076e-09	Up
Irf2	Oligodendrocyte	1	0.02764	0.3308	0.5157	None	-0.6875	1.992e-08	4.776e-07	Down	-0.6903	3.582e-12	2.145e-10	Down
Irf3	Oligodendrocyte	1	0.04827	0.2769	0.4654	None	-0.166	0.03918	0.1231	None	-0.2246	0.00156	0.01468	Down
Irs2	Oligodendrocyte	1	0.03036	0.02182	0.1033	None	-0.1744	0.01896	0.075	None	-0.2082	0.0008422	0.008768	Down
Itfg1	Oligodendrocyte	1	-0.2514	0.0724	0.2124	None	-0.4333	0.0005915	0.005085	Down	-0.1587	0.2189	0.5186	None
Itga4	Oligodendrocyte	1	-0.06402	0.3493	0.532	None	-0.1789	0.0008561	0.006911	Down				None
Itgad	Oligodendrocyte	1	0.6375	1.313e-14	1.285e-12	Up	0.9472	7.454e-27	8.34e-25	Up	0.3402	8.715e-06	0.0001556	Up
Itgav	Oligodendrocyte	1	0.6256	1.413e-11	1.004e-09	Up	0.0155	0.08327	0.2047	None	-0.6412	1.238e-11	6.865e-10	Down
Itgb8	Oligodendrocyte	1	-0.1668	0.2494	0.4383	None	-0.6666	6.496e-11	2.15e-09	Down	-0.4965	1.774e-09	7.002e-08	Down
Itm2b	Oligodendrocyte	1	0.5818	2.738e-07	8.97e-06	Up	0.3087	0.0334	0.1108	None	-0.2984	0.0002856	0.003457	Down
Itpk1	Oligodendrocyte	1	-0.1847	0.2382	0.4264	None	0.8747	5.853e-20	4.636e-18	Up	1.109	2.876e-32	8.461e-30	Up
Itpr2	Oligodendrocyte	1	0.1225	0.08671	0.2365	None	0.1592	0.0008581	0.006913	Up	0.0305	0.02256	0.1206	None
Itprid2	Oligodendrocyte	1	-0.1062	0.001356	0.01414	Down	0.1111	0.04456	0.1333	None	0.1941	0.019	0.1049	None
Itsn1	Oligodendrocyte	0	0.1856	0.04447	0.1604	None	0.2063	0.006449	0.03433	Up	-0.007296	0.8428	0.9418	None
Ivd	Oligodendrocyte	1	0.08213	0.4036	0.5775	None	-0.2077	0.06431	0.1716	None	-0.2948	0.0007732	0.008137	Down
Ivns1abp	Oligodendrocyte	1	0.321	7.14e-05	0.001236	Up	0.2733	0.003141	0.01966	Up	-0.02594	0.7664	0.9141	None
Iws1	Oligodendrocyte	1	-0.1347	0.001364	0.01421	Down	-0.1202	0.1257	0.2662	None	0.03844	0.04119	0.1862	None
Izumo4	Oligodendrocyte	0	0.2636	0.002988	0.02562	Up	0.1364	0.171	0.3212	None	-0.1041	0.2226	0.5238	None
Jade2	Oligodendrocyte	1	0.07272	0.4512	0.6141	None	0.4783	4.413e-08	1.01e-06	Up	0.3804	1.352e-06	2.806e-05	Up
Jakmip2	Oligodendrocyte	1	-0.08696	0.6379	0.7562	None	-0.4276	1.019e-05	0.0001542	Down	-0.2923	0.0002264	0.002823	Down
Jakmip3	Oligodendrocyte	1	0.2618	0.04378	0.159	None	0.4553	0.0008002	0.006559	Up	0.1458	0.4392	0.7322	None
Jam3	Oligodendrocyte	1	0.4775	0.0006871	0.008402	Up	0.3033	0.01396	0.0598	None	-0.134	0.4742	0.7527	None
Josd2	Oligodendrocyte	1	-0.6149	8.76e-06	0.000206	Down	-0.9511	5.344e-14	2.43e-12	Down	-0.3516	0.0002672	0.003275	Down
Jund	Oligodendrocyte	1	0.08043	0.4804	0.6392	None	0.3238	0.0005008	0.004457	Up	0.2342	0.005894	0.04216	Up
Kansl1	Oligodendrocyte	1	0.3992	0.0006768	0.008321	Up	0.6244	3.292e-07	6.648e-06	Up	0.2221	0.1345	0.3932	None
Kansl3	Oligodendrocyte	1	0.1838	0.02084	0.1003	None	0.251	0.0008319	0.006772	Up	0.03696	0.8457	0.9419	None
Kantr	Oligodendrocyte	0	0.126	0.05373	0.1784	None	0.1955	0.003853	0.02302	Up	0.06808	0.4607	0.7448	None
Kat2b	Oligodendrocyte	1	0.02045	0.07396	0.2147	None	0.2796	1.121e-06	2.073e-05	Up	0.2607	0.002766	0.02325	Up
Kat6a	Oligodendrocyte	1	0.1942	0.09669	0.2528	None	0.4239	0.0001307	0.001438	Up	0.2254	0.04235	0.1894	None
Kazn	Oligodendrocyte	1	-0.2396	0.005971	0.04203	Down	0.1054	0.1926	0.3452	None	0.3242	0.001962	0.01761	Up
Kcna1	Oligodendrocyte	1	0.7362	3.849e-10	2.202e-08	Up	1.599	2.701e-41	6.141e-39	Up	0.8776	1.19e-16	1.22e-14	Up
Kcna6	Oligodendrocyte	1	-0.3079	0.0056	0.04042	Down	0.2391	0.07503	0.1902	None	0.5352	2.229e-09	8.572e-08	Up
Kcnab1	Oligodendrocyte	1	1.022	7.311e-13	5.738e-11	Up	1.618	7.833e-33	1.2e-30	Up	0.6375	8.912e-08	2.403e-06	Up
Kcnd2	Oligodendrocyte	1	0.08817	0.3471	0.5304	None	-0.1941	0.001399	0.01033	Down	-0.2807	2.671e-08	8.07e-07	Down
Kcnip4	Oligodendrocyte	1	-0.002609	0.9987	0.9993	None	-0.3248	8.822e-06	0.0001365	Down	-0.3101	2.89e-07	6.81e-06	Down
Kcnk13	Oligodendrocyte	1	-0.7444	3.76e-08	1.476e-06	Down	-0.9884	1.111e-14	5.185e-13	Down	-0.2094	0.06107	0.2438	None
Kcnq1ot1	Oligodendrocyte	1	0.059	0.3504	0.5323	None	-0.2813	0.1179	0.2558	None	-0.3084	0.002537	0.02179	Down
Kcnq3	Oligodendrocyte	1	0.1459	0.4105	0.5826	None	0.6257	8.754e-15	4.142e-13	Up	0.5057	7.754e-17	8.198e-15	Up
Kctd13	Oligodendrocyte	1	0.6205	4.082e-11	2.701e-09	Up	0.759	1.173e-13	4.952e-12	Up	0.1204	0.2548	0.5588	None
Kctd16	Oligodendrocyte	1	0.2796	0.009269	0.0574	None	0.7183	4.98e-12	1.809e-10	Up	0.4333	3.799e-06	7.222e-05	Up
Kctd3	Oligodendrocyte	1	0.313	0.02283	0.1063	None	0.3889	2.496e-05	0.0003397	Up	0.0629	0.1029	0.3346	None
Kdsr	Oligodendrocyte	1	-0.1134	0.003487	0.02888	Down	-0.07761	0.127	0.2677	None	0.05149	0.1151	0.3582	None
Kif13a	Oligodendrocyte	1	-0.1884	0.3486	0.5315	None	0.698	1.512e-12	5.76e-11	Up	0.9197	1.37e-22	2.318e-20	Up
Kif16b	Oligodendrocyte	1	-0.3222	0.00724	0.04834	Down	-0.07321	0.4348	0.5747	None	0.2499	0.01497	0.08822	None
Kif1a	Oligodendrocyte	1	0.08559	0.6253	0.7483	None	0.3566	8.43e-05	0.0009938	Up	0.2129	0.001117	0.01114	Up
Kif1b	Oligodendrocyte	1	0.08498	0.04714	0.1655	None	0.2767	3.222e-09	8.871e-08	Up	0.1977	0.0002764	0.003363	Up
Kif21a	Oligodendrocyte	0	0.1376	0.007407	0.04922	Up	0.07148	0.07595	0.1918	None	-0.04339	0.5982	0.8302	None
Kif3a	Oligodendrocyte	1	-0.1818	0.1829	0.3643	None	-0.7088	6.268e-08	1.394e-06	Down	-0.5436	2.435e-07	5.886e-06	Down
Kif6	Oligodendrocyte	1	0.289	0.002209	0.02029	Up	0.5341	2.278e-06	3.964e-05	Up	0.2207	0.09733	0.3233	None
Kirrel3	Oligodendrocyte	1	-0.4497	0.0004311	0.005874	Down	0.4893	8.29e-06	0.0001302	Up	1.027	8.117e-20	1.194e-17	Up
Klf13	Oligodendrocyte	1	0.7952	4.486e-14	4.037e-12	Up	1.477	2.719e-38	5.324e-36	Up	0.6955	1.702e-10	8.346e-09	Up
Klf15	Oligodendrocyte	1	0.1664	0.00073	0.008788	Up	0.1982	0.003999	0.02367	Up	0.0206	0.1325	0.3894	None
Klf3	Oligodendrocyte	1	-0.2868	0.0008017	0.009527	Down	-0.2198	0.0193	0.07589	None	0.07331	0.3359	0.6445	None
Klf7	Oligodendrocyte	1	-0.6533	2.963e-07	9.569e-06	Down	-0.3946	0.002	0.01377	Down	0.2617	0.04584	0.2007	None
Klf9	Oligodendrocyte	1	0.7359	6.726e-13	5.342e-11	Up	0.8427	6.844e-15	3.282e-13	Up	0.07019	0.6661	0.8668	None
Klhdc10	Oligodendrocyte	0	-0.08934	0.5223	0.6718	None	-0.2402	0.009449	0.04537	Down	-0.1591	0.1546	0.4287	None
Klhl2	Oligodendrocyte	1	0.1981	0.02153	0.1026	None	0.2912	9.687e-05	0.001107	Up	0.1282	0.1313	0.3886	None
Klhl24	Oligodendrocyte	1	0.1105	0.01909	0.09511	None	0.1572	0.001191	0.009039	Up	0.04028	0.7655	0.9141	None
Klk6	Oligodendrocyte	1	0.4113	0.000177	0.002771	Up	-0.02271	0.9673	0.9766	None	-0.4534	4.548e-07	1.023e-05	Down
Kmt2c	Oligodendrocyte	1	0.09836	0.003604	0.02949	None	0.199	0.0008475	0.006859	Up	0.05028	0.8312	0.9381	None
Kmt5a	Oligodendrocyte	1	0.2074	0.001774	0.01722	Up	0.179	0.006452	0.03433	Up	-0.01241	0.7764	0.9169	None
Kmt5c	Oligodendrocyte	1	-0.2316	4.595e-05	0.0008639	Down	-0.2269	0.0004039	0.003768	Down	0.005645	0.3581	0.6628	None
Kndc1	Oligodendrocyte	1	0.2513	0.006167	0.04284	Up	1.082	2.558e-30	3.679e-28	Up	0.8813	1.893e-23	3.372e-21	Up
Kpna3	Oligodendrocyte	1	-0.06886	0.6777	0.7837	None	0.2426	0.01049	0.04889	Up	0.2882	0.0004404	0.005034	Up
Krit1	Oligodendrocyte	1	0.06973	0.1541	0.3292	None	-0.2988	0.05361	0.1514	None	-0.3129	0.001653	0.01538	Down
Ktn1	Oligodendrocyte	1	0.1262	0.00435	0.03383	Up	-0.2375	0.1134	0.2494	None	-0.3633	3.056e-05	0.0004679	Down
Lamc1	Oligodendrocyte	1	0.3302	9.497e-05	0.001599	Up	0.5676	1.539e-08	3.806e-07	Up	0.1951	0.08593	0.3011	None
Lamtor1	Oligodendrocyte	1	-0.04219	0.03613	0.1423	None	-0.145	0.0006589	0.005563	Down	-0.091	0.1735	0.4568	None
Lancl1	Oligodendrocyte	1	-0.2736	0.0008119	0.009549	Down	-0.2235	0.02774	0.098	None	0.06612	0.2416	0.5465	None
Larp6	Oligodendrocyte	1	-0.4041	2.612e-05	0.0005426	Down	-0.04632	0.3832	0.529	None	0.3745	1.69e-06	3.45e-05	Up
Lars2	Oligodendrocyte	1	0.1556	0.006365	0.04382	Up	0.3767	7.793e-07	1.497e-05	Up	0.2126	0.0175	0.0995	None
Lbr	Oligodendrocyte	1	0.2263	0.02474	0.1124	None	0.4281	2.335e-06	4.045e-05	Up	0.1811	0.05827	0.2357	None
Lcor	Oligodendrocyte	1	0.1312	0.007969	0.05202	None	0.3233	0.0006106	0.005224	Up	0.2246	0.08787	0.3053	None
Ldb1	Oligodendrocyte	1	-0.1534	0.002624	0.02322	Down	-0.1361	0.0304	0.1042	None	0.04403	0.3549	0.6605	None
Ldhb	Oligodendrocyte	1	0.2368	0.03306	0.1352	None	-0.112	0.2272	0.3819	None	-0.3442	1.338e-05	0.0002269	Down
Ldlr	Oligodendrocyte	1	-0.09621	0.3151	0.501	None	0.1444	0.1166	0.2541	None	0.2327	0.000171	0.002239	Up
Ldlrad4	Oligodendrocyte	1	-0.2317	0.006805	0.04612	Down	0.2649	0.003308	0.02051	Up	0.5495	2.155e-07	5.284e-06	Up
Leng8	Oligodendrocyte	1	-0.3224	0.008689	0.05513	None	-0.3921	9.112e-05	0.001055	Down	-0.04954	0.4207	0.7147	None
Lgi3	Oligodendrocyte	1	-0.2021	0.208	0.3925	None	0.3969	0.0002981	0.002935	Up	0.6166	1.932e-10	9.407e-09	Up
Lgr4	Oligodendrocyte	1	0.04732	0.416	0.5871	None	-0.2951	0.0002584	0.002587	Down	-0.3263	2.373e-06	4.654e-05	Down
Lhfpl3	Oligodendrocyte	0	-0.0293	0.4755	0.6348	None	0.1291	0.07894	0.1975	None	0.143	0.006438	0.04515	Up
Lifr	Oligodendrocyte	1	-0.3507	2.925e-05	0.0005965	Down	-0.1544	0.019	0.07511	None	0.2139	0.01157	0.07256	None
Limch1	Oligodendrocyte	1	-0.04853	0.7596	0.8386	None	0.6372	1.031e-18	7.574e-17	Up	0.6957	8.816e-29	2.295e-26	Up
Limd1	Oligodendrocyte	1	-0.02968	0.444	0.6081	None	-0.1699	0.002223	0.01491	Down	-0.1178	0.04648	0.2025	None
Lin7c	Oligodendrocyte	0	0.1867	0.006562	0.04497	Up	0.08296	0.3661	0.5133	None	-0.1073	0.1033	0.3351	None
Lingo2	Oligodendrocyte	1	0.127	0.2579	0.4467	None	-0.15	0.006424	0.03425	Down	-0.272	7.682e-06	0.0001394	Down
Lipa	Oligodendrocyte	1	0.1417	0.006232	0.0431	Up	-0.0139	0.05027	0.1443	None	-0.1712	0.04756	0.2051	None
Lipe	Oligodendrocyte	1	0.1455	0.1295	0.2977	None	0.3301	0.0001608	0.001731	Up	0.1645	0.05384	0.2231	None
Litaf	Oligodendrocyte	1	0.09377	0.003192	0.02703	None	-0.5392	6.521e-06	0.0001038	Down	-0.6536	9.178e-18	1.035e-15	Down
Lmbrd1	Oligodendrocyte	1	0.06287	0.00582	0.04127	None	-0.132	0.2595	0.4165	None	-0.1822	0.0007432	0.007871	Down
Lnpk	Oligodendrocyte	1	-0.08534	0.1827	0.364	None	0.2208	0.004168	0.02447	Up	0.2931	0.0005927	0.006553	Up
Lonp2	Oligodendrocyte	1	-0.0469	0.04619	0.1634	None	0.2451	0.02263	0.08495	None	0.3071	0.001568	0.01474	Up
Lpar1	Oligodendrocyte	1	-0.5872	1.431e-06	4.077e-05	Down	-0.6753	2.348e-08	5.592e-07	Down	-0.06361	0.7597	0.911	None
Lpcat2	Oligodendrocyte	1	0.09751	0.04968	0.1707	None	-0.3812	2.715e-06	4.623e-05	Down	-0.4319	2.668e-09	1.01e-07	Down
Lpgat1	Oligodendrocyte	1	-0.2876	0.08623	0.2357	None	0.2188	0.0005495	0.00477	Up	0.5262	8.724e-09	2.982e-07	Up
Lrig2	Oligodendrocyte	1	-0.2268	0.03322	0.1352	None	-0.0178	0.0113	0.05117	None	0.2025	0.006255	0.04419	Up
Lrmda	Oligodendrocyte	1	0.01947	0.06914	0.2067	None	0.5487	3.803e-05	0.0004983	Up	0.5327	2.117e-08	6.632e-07	Up
Lrp11	Oligodendrocyte	1	-0.02062	0.5834	0.7172	None	-0.1716	0.002504	0.01642	Down	-0.1506	0.001921	0.01729	Down
Lrrc4	Oligodendrocyte	1	-0.3383	0.004822	0.03633	Down	-0.2002	0.1461	0.291	None	0.1461	0.0118	0.07344	None
Lrrc4b	Oligodendrocyte	1	-0.3399	0.0002541	0.003803	Down	-0.05801	0.4682	0.5997	None	0.2887	0.0001712	0.002239	Up
Lrrc4c	Oligodendrocyte	1	0.2789	0.001673	0.01652	Up	0.2113	0.0002125	0.002191	Up	-0.04646	0.2388	0.5424	None
Lrrc8a	Oligodendrocyte	1	0.4146	4.804e-09	2.316e-07	Up	0.3952	3.349e-08	7.818e-07	Up	-0.03436	0.8282	0.9358	None
Lrrc8d	Oligodendrocyte	1	-0.7234	7.086e-09	3.276e-07	Down	-0.5493	1.343e-06	2.446e-05	Down	0.194	0.08731	0.3039	None
Lrrc8dos	Oligodendrocyte	1	-0.1107	0.1369	0.3086	None	-0.1952	0.002111	0.01425	Down	-0.06873	0.337	0.6461	None
Lrrfip2	Oligodendrocyte	1	-0.1955	0.0008415	0.009828	Down	-0.1832	0.0008125	0.006637	Down	0.004949	0.9286	0.9758	None
Lrrn1	Oligodendrocyte	1	0.5012	1.773e-07	6.076e-06	Up	0.626	3.134e-07	6.385e-06	Up	0.1243	0.03268	0.1583	None
Lrrtm3	Oligodendrocyte	1	-0.1636	0.0132	0.07324	None	0.1801	0.2961	0.4527	None	0.3541	1.332e-05	0.0002266	Up
Lsamp	Oligodendrocyte	0	0.2331	0.1743	0.3543	None	-0.06951	0.8384	0.8824	None	-0.3578	0.002797	0.02345	Down
Lsm12	Oligodendrocyte	1	0.08023	0.1064	0.2656	None	0.2203	0.0009091	0.007249	Up	0.1344	0.01685	0.09685	None
Lsm7	Oligodendrocyte	0	0.1282	0.224	0.4099	None	-0.0605	0.7043	0.784	None	-0.2018	0.005277	0.03904	Down
Ltn1	Oligodendrocyte	1	0.07247	0.01156	0.06651	None	0.2571	0.003324	0.02059	Up	0.1501	0.005888	0.04216	Up
Luc7l2	Oligodendrocyte	1	-0.3556	0.01358	0.07469	None	0.3749	6.401e-07	1.246e-05	Up	0.7152	1.437e-16	1.451e-14	Up
Luzp2	Oligodendrocyte	1	0.04795	0.3257	0.5109	None	-0.4956	3.814e-05	0.0004987	Down	-0.4951	1.868e-07	4.648e-06	Down
Lysmd4	Oligodendrocyte	1	-0.4698	8.956e-06	0.0002092	Down	-0.3036	0.0054	0.02999	Down	0.202	0.04515	0.1984	None
Lzic	Oligodendrocyte	1	-0.1196	0.06162	0.1938	None	-0.2018	0.0007889	0.006513	Down	-0.072	0.2719	0.5756	None
Lzts2	Oligodendrocyte	1	0.1661	0.0001519	0.002395	Up	0.4396	9.457e-09	2.433e-07	Up	0.2796	0.02587	0.1339	None
Macf1	Oligodendrocyte	1	0.03808	0.7057	0.8039	None	-0.2676	0.00961	0.04582	Down	-0.3422	8.349e-05	0.001168	Down
Mad1l1	Oligodendrocyte	1	0.1401	0.06536	0.1996	None	0.5145	7.147e-08	1.569e-06	Up	0.3225	0.0006633	0.007181	Up
Mafg	Oligodendrocyte	1	0.01909	0.2523	0.4412	None	-0.11	0.007607	0.03861	Down	-0.1366	0.01634	0.09483	None
Mag	Oligodendrocyte	1	-0.2185	3.098e-05	0.0006298	Down	-0.02341	0.8258	0.8734	None	0.201	1.561e-06	3.211e-05	Up
Magi1	Oligodendrocyte	1	-0.003068	0.3699	0.5508	None	-0.5097	8.569e-05	0.001004	Down	-0.5219	1.834e-05	0.0003019	Down
Magi2	Oligodendrocyte	1	-0.05321	0.03822	0.1468	None	0.04807	0.07115	0.1844	None	0.1098	3.699e-07	8.427e-06	Up
Magt1	Oligodendrocyte	1	0.02774	0.7925	0.861	None	-0.2647	0.0139	0.05968	None	-0.2806	0.0005977	0.006598	Down
Mal	Oligodendrocyte	1	-0.6228	9.012e-09	4.138e-07	Down	0.07376	0.6776	0.763	None	0.6796	3.3e-15	2.939e-13	Up
Maml3	Oligodendrocyte	1	0.3902	1.019e-06	3.003e-05	Up	0.2526	0.0004446	0.004055	Up	-0.1859	0.04745	0.2051	None
Man1a2	Oligodendrocyte	1	0.202	5.783e-05	0.001038	Up	0.1537	0.000962	0.007619	Up	-0.03865	0.5644	0.8112	None
Man2b1	Oligodendrocyte	1	0.1873	0.002968	0.02552	Up	0.1338	0.05297	0.15	None	-0.06425	0.3263	0.6353	None
Man2c1os	Oligodendrocyte	1	-0.08082	0.1132	0.2756	None	-0.137	0.001414	0.01041	Down	-0.06071	0.2708	0.5752	None
Manf	Oligodendrocyte	1	-0.4127	0.0001031	0.001727	Down	-0.3751	0.0003558	0.003399	Down	0.05277	0.7886	0.9225	None
Map1b	Oligodendrocyte	1	-0.1404	0.009739	0.05947	None	-0.3908	9.773e-05	0.001115	Down	-0.2198	0.00559	0.0405	Down
Map2	Oligodendrocyte	1	-0.3177	0.01179	0.06746	None	-0.4833	0.0001453	0.001585	Down	-0.1573	0.0689	0.2622	None
Map3k12	Oligodendrocyte	1	-0.1755	0.01036	0.06208	None	-0.2066	0.002659	0.01713	Down	-0.03707	0.6638	0.8662	None
Map3k3	Oligodendrocyte	1	-0.1364	0.01531	0.08134	None	0.2117	3e-05	0.000402	Up	0.3171	0.0006736	0.007282	Up
Map4	Oligodendrocyte	0	-0.1199	0.3229	0.5085	None	-0.348	0.009517	0.04559	Down	-0.2561	0.06785	0.2602	None
Map4k2	Oligodendrocyte	1	-0.1475	0.07603	0.2188	None	-0.01282	0.4139	0.5559	None	0.1725	0.004592	0.0351	Up
Map4k4	Oligodendrocyte	1	0.2617	0.1329	0.303	None	0.008213	0.03995	0.1246	None	-0.2731	0.001013	0.01028	Down
Map6d1	Oligodendrocyte	1	-0.2851	0.005333	0.03926	Down	-0.3405	0.0007662	0.006347	Down	-0.04472	0.4404	0.7327	None
Map7	Oligodendrocyte	1	-0.01766	0.678	0.7837	None	0.1067	3.885e-08	9.039e-07	Up	0.1246	6.374e-09	2.223e-07	Up
Map7d2	Oligodendrocyte	1	0.9317	2.807e-16	3.384e-14	Up	1.523	8.501e-43	1.997e-40	Up	0.569	6.254e-08	1.72e-06	Up
Mapk10	Oligodendrocyte	1	0.2886	0.0001071	0.001784	Up	-0.07676	0.465	0.5975	None	-0.3533	2.091e-07	5.165e-06	Down
Mapre2	Oligodendrocyte	1	-0.2524	0.03012	0.1278	None	-1.152	8.658e-17	5.449e-15	Down	-0.9163	2.396e-18	2.896e-16	Down
Mapt	Oligodendrocyte	1	-0.2943	1.272e-09	6.87e-08	Down	-0.003827	0.9825	0.9868	None	0.2953	6.172e-12	3.54e-10	Up
March1	Oligodendrocyte	1	-0.5103	7.415e-05	0.001277	Down	0.04997	0.4022	0.5448	None	0.5347	1.952e-06	3.885e-05	Up
March6	Oligodendrocyte	1	0.02899	0.01759	0.08961	None	0.1818	0.002068	0.01409	Up	0.1397	0.163	0.443	None
March8	Oligodendrocyte	1	0.2631	0.01076	0.06344	None	0.5434	1.083e-11	3.874e-10	Up	0.3162	2.137e-05	0.0003485	Up
Mark2	Oligodendrocyte	1	-0.14	0.4201	0.5905	None	0.1577	0.039	0.1227	None	0.2842	0.002289	0.02007	Up
Mast2	Oligodendrocyte	1	-0.2263	0.01572	0.08292	None	-0.317	0.0003521	0.003373	Down	-0.06652	0.6111	0.8372	None
Mast3	Oligodendrocyte	1	0.9027	2.027e-42	1.14e-39	Up	1.113	7.474e-72	8.78e-69	Up	0.271	1.47e-05	0.0002474	Up
Mast4	Oligodendrocyte	1	-0.1707	2.767e-07	9.021e-06	Down	0.05628	0.06499	0.1731	None	0.2075	4.104e-07	9.287e-06	Up
Mat2a	Oligodendrocyte	1	1.351	2.682e-47	2.586e-44	Up	1.423	4.663e-53	2.054e-50	Up	0.09976	0.2503	0.5552	None
Matn2	Oligodendrocyte	1	-0.1497	0.005889	0.04162	Down	-0.4849	1.645e-11	5.769e-10	Down	-0.3114	8.651e-07	1.853e-05	Down
Matn4	Oligodendrocyte	0	-0.1541	0.1036	0.2618	None	0.07005	0.6022	0.7074	None	0.225	0.003525	0.02821	Up
Matr3	Oligodendrocyte	1	-0.228	0.00517	0.03844	Down	-0.05229	0.04111	0.1269	None	0.1893	0.03454	0.1641	None
Maz	Oligodendrocyte	1	-0.1705	0.003711	0.03013	Down	-0.2292	0.0001853	0.001944	Down	-0.04228	0.55	0.8022	None
Mb21d2	Oligodendrocyte	1	0.09132	0.2812	0.4693	None	0.3208	0.0001467	0.001598	Up	0.2039	0.006152	0.04368	Up
Mbnl2	Oligodendrocyte	1	-0.1986	1.654e-05	0.0003614	Down	0.002534	0.1291	0.2697	None	0.2197	0.0001099	0.001497	Up
Mboat2	Oligodendrocyte	1	0.2174	0.0005693	0.007237	Up	0.5114	4.544e-13	1.83e-11	Up	0.3002	4.353e-06	8.228e-05	Up
Mbtd1	Oligodendrocyte	0	0.1698	0.07984	0.2251	None	0.1934	0.003969	0.02355	Up	0.0165	0.5484	0.8019	None
Mcam	Oligodendrocyte	1	-0.3148	3.588e-06	9.209e-05	Down	-0.2531	0.0004011	0.003753	Down	0.06964	0.3499	0.6572	None
Mcl1	Oligodendrocyte	1	0.1998	0.0003027	0.004353	Up	0.1293	0.03741	0.1188	None	-0.06673	0.1919	0.4838	None
Mcmbp	Oligodendrocyte	0	0.1513	0.08268	0.2298	None	0.2035	0.008059	0.04033	Up	0.04055	0.7509	0.9081	None
Mcu	Oligodendrocyte	1	0.08543	0.4948	0.6512	None	0.2992	0.00128	0.009582	Up	0.1958	0.01068	0.06785	None
Mdh1	Oligodendrocyte	1	0.5345	2.752e-08	1.119e-06	Up	0.04439	0.6211	0.7205	None	-0.5081	2.008e-10	9.698e-09	Down
Mdh2	Oligodendrocyte	1	0.1045	0.02355	0.1086	None	-0.07092	0.2059	0.3591	None	-0.1894	0.003539	0.02828	Down
Mdm4	Oligodendrocyte	1	0.2193	0.006562	0.04497	Up	0.1856	0.00257	0.01671	Up	-0.03788	0.9048	0.9643	None
Mecp2	Oligodendrocyte	1	0.185	0.1834	0.3648	None	0.4127	0.0001879	0.001968	Up	0.1861	0.05913	0.2381	None
Med13l	Oligodendrocyte	1	-0.08826	0.2609	0.4496	None	0.1761	0.002024	0.01389	Up	0.2551	0.00141	0.01353	Up
Med21	Oligodendrocyte	1	0.1909	6.301e-05	0.001113	Up	0.1328	0.002823	0.01801	Up	-0.07378	0.3691	0.6759	None
Med4	Oligodendrocyte	1	-0.1461	0.04288	0.1571	None	-0.2053	0.002078	0.01409	Down	-0.07683	0.2192	0.5193	None
Meg3	Oligodendrocyte	1	0.6983	3.962e-11	2.648e-09	Up	-0.6332	1.193e-09	3.432e-08	Down	-1.321	1.976e-51	1.91e-48	Down
Megf10	Oligodendrocyte	1	-0.2522	0.1396	0.3123	None	-0.8673	5.451e-11	1.825e-09	Down	-0.6246	3.007e-08	8.963e-07	Down
Meis1	Oligodendrocyte	1	-0.3419	0.01246	0.07027	None	-0.3786	0.004142	0.02435	Down	-0.001402	0.9814	0.9935	None
Mest	Oligodendrocyte	1	0.1378	0.02354	0.1086	None	-0.0001069	0.3391	0.4909	None	-0.1382	0.006228	0.04404	Down
Mettl7a1	Oligodendrocyte	1	0.8291	4.2e-14	3.831e-12	Up	0.9442	3.474e-15	1.737e-13	Up	0.1074	0.2162	0.5155	None
Mfn1	Oligodendrocyte	1	0.1532	0.08828	0.2391	None	0.1853	0.003871	0.02308	Up	0.009988	0.5868	0.823	None
Mgat3	Oligodendrocyte	1	0.2682	4.874e-05	0.0008988	Up	0.7756	2.05e-16	1.204e-14	Up	0.4702	4.216e-07	9.51e-06	Up
Mgat5	Oligodendrocyte	1	-0.2372	0.004488	0.03462	Down	-0.3001	0.0004041	0.003768	Down	-0.05329	0.715	0.8905	None
Mgrn1	Oligodendrocyte	1	0.0617	0.005609	0.04042	None	0.1364	0.0067	0.03521	Up	0.07524	0.4715	0.7513	None
Mgst3	Oligodendrocyte	1	0.1302	0.05362	0.1783	None	-0.07367	0.4307	0.5714	None	-0.2025	8.64e-05	0.001201	Down
Mia2	Oligodendrocyte	1	0.1369	0.006991	0.04705	Up	-0.02948	0.02819	0.09915	None	-0.1656	0.1697	0.4517	None
Mical3	Oligodendrocyte	1	-0.1264	0.546	0.6875	None	-0.4234	4.116e-05	0.0005333	Down	-0.2565	1.743e-05	0.0002892	Down
Micall1	Oligodendrocyte	1	-0.4109	9.82e-05	0.001649	Down	-0.1346	0.3796	0.5265	None	0.2832	0.003513	0.02821	Up
Micu3	Oligodendrocyte	1	0.1018	0.0009076	0.01042	Up	-0.1129	0.006708	0.03521	Down	-0.2134	0.02674	0.1372	None
Mid1ip1	Oligodendrocyte	0	-0.1002	0.2091	0.394	None	-0.1822	0.005757	0.03134	Down	-0.07401	0.2605	0.5627	None
Mier1	Oligodendrocyte	1	-0.1208	0.4628	0.623	None	-0.3208	0.001367	0.01016	Down	-0.1936	0.03605	0.1694	None
Mindy2	Oligodendrocyte	1	-0.1604	0.00393	0.03146	Down	-0.09822	0.00697	0.03615	None	0.07482	0.5518	0.8022	None
Mink1	Oligodendrocyte	1	0.127	0.0006648	0.008234	Up	0.3328	0.0004421	0.004037	Up	0.2062	0.1042	0.336	None
Mitf	Oligodendrocyte	1	0.04608	0.9425	0.9608	None	-0.6358	2.092e-06	3.687e-05	Down	-0.6476	3.199e-09	1.183e-07	Down
Mks1	Oligodendrocyte	1	-0.08608	0.0255	0.115	None	-0.3521	8.762e-06	0.0001363	Down	-0.2485	2.662e-05	0.0004161	Down
Mlf2	Oligodendrocyte	1	-0.009748	0.241	0.4297	None	-0.2212	0.0009034	0.00722	Down	-0.2168	0.001073	0.01077	Down
Mllt10	Oligodendrocyte	0	0.07263	0.1723	0.3523	None	0.218	0.00811	0.04055	Up	0.1488	0.3277	0.6373	None
Mllt3	Oligodendrocyte	1	0.1286	0.3668	0.5479	None	0.138	0.0003166	0.003078	Up	0.02101	0.002561	0.02191	None
Mmaa	Oligodendrocyte	0	-0.05045	0.07014	0.2082	None	-0.1089	0.007072	0.0366	Down	-0.02773	0.8423	0.9418	None
Mmd2	Oligodendrocyte	1	0.1606	0.004131	0.03258	Up	-0.002453	0.3603	0.5087	None	-0.1713	0.003603	0.02868	Down
Mob3b	Oligodendrocyte	1	-0.4032	0.005966	0.04203	Down	-1.34	5.327e-26	5.867e-24	Down	-0.8125	1.79e-15	1.646e-13	Down
Mobp	Oligodendrocyte	1	0.1313	8.896e-08	3.211e-06	Up	0.3164	1.084e-18	7.875e-17	Up	0.1929	3.054e-05	0.0004679	Up
Morf4l1	Oligodendrocyte	1	0.368	0.0002052	0.003156	Up	0.08503	0.5664	0.6798	None	-0.3009	0.000641	0.007007	Down
Mpc1	Oligodendrocyte	1	-0.5337	6.833e-06	0.0001624	Down	-0.2415	0.1024	0.2343	None	0.2792	0.006944	0.04825	Up
Mpp5	Oligodendrocyte	1	0.1942	0.02836	0.123	None	0.748	6.943e-11	2.274e-09	Up	0.4793	1.215e-05	0.0002087	Up
Mpzl1	Oligodendrocyte	1	-0.1595	0.4052	0.5789	None	-0.5892	3.509e-05	0.000465	Down	-0.4095	0.0005229	0.005839	Down
Mrpl2	Oligodendrocyte	1	0.1286	0.006168	0.04284	Up	0.02227	0.3596	0.5084	None	-0.1156	0.0282	0.1423	None
Mrpl41	Oligodendrocyte	1	0.2515	0.0009763	0.01088	Up	0.2155	0.008972	0.04359	Up	-0.05219	0.5286	0.7867	None
Mrps17	Oligodendrocyte	1	-0.1946	0.004746	0.03589	Down	-0.2181	0.00208	0.01409	Down	-0.01306	0.8522	0.9441	None
Mrps24	Oligodendrocyte	0	0.08502	0.3098	0.4959	None	-0.07892	0.278	0.4364	None	-0.1534	0.003188	0.02615	Down
Mrps5	Oligodendrocyte	1	0.1749	0.005701	0.04076	Up	-0.04645	0.1137	0.2499	None	-0.2111	0.007159	0.04933	Down
Mrps6	Oligodendrocyte	1	0.1946	0.001777	0.01722	Up	0.2085	0.003563	0.02176	Up	0.002532	0.7232	0.8955	None
Mrtfb	Oligodendrocyte	1	0.5282	3.018e-09	1.509e-07	Up	0.7567	1.187e-13	4.982e-12	Up	0.2135	0.00558	0.04047	Up
Msi2	Oligodendrocyte	1	-0.1673	0.3306	0.5157	None	0.4112	0.0004119	0.00382	Up	0.5612	1.174e-08	3.894e-07	Up
Msl2	Oligodendrocyte	1	0.07883	0.05001	0.1712	None	0.1713	0.005469	0.03031	Up	0.1076	0.1929	0.4847	None
Mt1	Oligodendrocyte	1	0.7329	2.009e-10	1.2e-08	Up	0.4792	5.568e-06	9.043e-05	Up	-0.2853	0.01427	0.08506	None
Mt2	Oligodendrocyte	1	0.1745	0.002527	0.02248	Up				None	-0.04393	0.587	0.823	None
Mta3	Oligodendrocyte	1	0.1466	0.2633	0.4513	None	0.2401	0.001157	0.008824	Up	0.122	0.1327	0.3897	None
Mtch2	Oligodendrocyte	1	0.1371	0.0157	0.08288	None	-0.1184	0.3285	0.4816	None	-0.2406	0.0007943	0.008307	Down
Mthfd1l	Oligodendrocyte	1	0.2537	0.002246	0.02052	Up	0.4417	5.29e-08	1.199e-06	Up	0.162	0.02819	0.1423	None
Mthfd2	Oligodendrocyte	1	0.1994	0.004602	0.03524	Up	0.1329	0.1449	0.2901	None	-0.05073	0.1123	0.3529	None
Mtm1	Oligodendrocyte	1	0.1392	0.125	0.2919	None	0.3363	0.0002499	0.002516	Up	0.1723	0.1033	0.3351	None
Mtmr2	Oligodendrocyte	1	0.1709	0.000447	0.006042	Up	0.7413	6.021e-14	2.703e-12	Up	0.5823	1.139e-07	3.01e-06	Up
Mtmr3	Oligodendrocyte	1	-0.1715	0.00402	0.03183	Down	0.1196	0.0002232	0.002267	Up	0.279	0.01081	0.06855	None
Mtmr4	Oligodendrocyte	1	-0.2267	0.0007019	0.008524	Down	-0.1655	0.0321	0.108	None	0.07408	0.2094	0.5085	None
Mtrex	Oligodendrocyte	1	-0.2141	0.02239	0.1047	None	-0.2322	0.006524	0.03465	Down	-0.005722	0.6159	0.84	None
Mtss1	Oligodendrocyte	1	-0.6008	1.563e-06	4.356e-05	Down	-0.4585	0.001032	0.008087	Down	0.1355	0.289	0.596	None
Mtus1	Oligodendrocyte	1	-0.3488	0.007013	0.04715	Down	-0.3951	0.003711	0.02228	Down	-0.04202	0.5696	0.8143	None
Mtx2	Oligodendrocyte	1	-0.1538	0.1488	0.3239	None	-0.2873	0.001748	0.01232	Down	-0.1232	0.176	0.4606	None
Mxd4	Oligodendrocyte	1	0.4687	6.794e-09	3.163e-07	Up	0.7231	8.693e-14	3.759e-12	Up	0.2532	0.003794	0.02995	Up
Mxi1	Oligodendrocyte	1	0.309	0.008806	0.0556	None	0.5522	9.819e-10	2.86e-08	Up	0.2531	2.4e-05	0.000383	Up
Mycbp2	Oligodendrocyte	1	0.01899	0.3979	0.5737	None	-0.2588	0.001124	0.008651	Down	-0.3229	2.091e-08	6.581e-07	Down
Myh14	Oligodendrocyte	1	0.05912	0.06447	0.1988	None	-0.3227	0.01049	0.04889	Down	-0.3779	6.011e-06	0.0001108	Down
Myo18a	Oligodendrocyte	1	-0.05216	0.09939	0.2565	None	0.3877	0.001368	0.01016	Up	0.4401	9.384e-05	0.001289	Up
Myo1d	Oligodendrocyte	1	-0.2272	0.02264	0.1056	None	0.1806	0.2149	0.3689	None	0.4271	1.006e-06	2.14e-05	Up
Myo1e	Oligodendrocyte	1	-0.1792	0.1913	0.3731	None	-0.7054	1.426e-08	3.551e-07	Down	-0.5219	1.734e-06	3.493e-05	Down
Myo6	Oligodendrocyte	1	-0.3926	0.006304	0.04351	Down	-0.2708	0.04062	0.126	None	0.1018	0.294	0.6012	None
Myo9b	Oligodendrocyte	1	-0.1032	0.001199	0.01279	Down	-0.2285	0.0003069	0.003001	Down	-0.1044	0.2884	0.5951	None
Mysm1	Oligodendrocyte	1	0.1366	0.08107	0.2276	None	-0.2376	0.08814	0.2117	None	-0.3632	2.353e-05	0.0003764	Down
Naa16	Oligodendrocyte	1	0.3423	4.742e-05	0.0008843	Up	0.3417	2.818e-05	0.0003799	Up	-0.0118	0.9878	0.9955	None
Nap1l5	Oligodendrocyte	1	0.4772	1.822e-05	0.0003917	Up	0.02575	0.8832	0.9148	None	-0.4988	6.002e-08	1.665e-06	Down
Napa	Oligodendrocyte	1	-0.319	0.000452	0.006042	Down	-0.3158	0.0008569	0.006911	Down	0.02867	0.9118	0.9683	None
Narf	Oligodendrocyte	1	0.1238	0.003174	0.02692	Up	0.3565	2.334e-06	4.045e-05	Up	0.2154	0.02518	0.1313	None
Nars	Oligodendrocyte	1	0.1331	0.004657	0.03548	Up	-0.05845	0.01758	0.07077	None	-0.1902	0.02614	0.1349	None
Nars2	Oligodendrocyte	1	0.1602	0.005469	0.0397	Up	0.1815	0.003162	0.01978	Up	0.01262	0.95	0.9838	None
Nav1	Oligodendrocyte	1	0.2483	0.002804	0.02449	Up	0.8388	4.472e-14	2.047e-12	Up	0.5726	1.122e-07	2.977e-06	Up
Nav2	Oligodendrocyte	1	0.1384	0.02471	0.1124	None	0.461	1.611e-06	2.904e-05	Up	0.3311	0.0004642	0.005288	Up
Nav3	Oligodendrocyte	1	-0.2628	0.01083	0.06356	None	-0.2225	0.005078	0.0287	Down	0.002824	0.6928	0.8793	None
Nbas	Oligodendrocyte	1	-0.2837	0.0834	0.2306	None	0.3725	4.457e-07	8.851e-06	Up	0.682	5.832e-13	3.907e-11	Up
Nbea	Oligodendrocyte	1	-0.242	0.07816	0.2225	None	-0.5533	2.305e-09	6.446e-08	Down	-0.3752	1.171e-07	3.048e-06	Down
Ncald	Oligodendrocyte	1	-0.2843	0.001537	0.01555	Down	-0.463	5.425e-05	0.0006768	Down	-0.1825	0.05386	0.2231	None
Ncam1	Oligodendrocyte	1	-0.2792	2.271e-07	7.478e-06	Down	-0.1031	0.04225	0.1292	None	0.1248	4.072e-05	0.0006129	Up
Ncam2	Oligodendrocyte	1	-0.3013	5.278e-06	0.0001291	Down	-1.019	4.419e-50	1.557e-47	Down	-0.7988	9.78e-33	3.309e-30	Down
Ncapd3	Oligodendrocyte	1	0.318	0.0002159	0.003296	Up	-0.01954	0.1292	0.2699	None	-0.323	0.001022	0.01033	Down
Ncbp1	Oligodendrocyte	1	0.3398	6.299e-07	1.892e-05	Up	0.2772	0.0002026	0.002106	Up	-0.07317	0.362	0.6677	None
Nck2	Oligodendrocyte	1	0.05562	0.1041	0.2627	None	0.2027	0.001465	0.01062	Up	0.133	0.08725	0.3039	None
Nckap5	Oligodendrocyte	1	-0.1842	0.00108	0.01179	Down	-0.1089	0.3132	0.4685	None	0.1159	0.001672	0.0155	Up
Ncoa2	Oligodendrocyte	1	0.1623	0.03264	0.1343	None	0.301	0.000495	0.004422	Up	0.1235	0.3398	0.6475	None
Nde1	Oligodendrocyte	1	0.6416	9.624e-10	5.325e-08	Up	0.3472	0.0007301	0.006076	Up	-0.2903	0.00449	0.03451	Down
Ndfip1	Oligodendrocyte	1	0.1909	0.009863	0.05987	None	-0.1308	0.13	0.2709	None	-0.3247	0.002744	0.02313	Down
Ndrg1	Oligodendrocyte	1	0.3182	0.02094	0.1007	None	0.004044	0.6649	0.754	None	-0.3322	0.005069	0.03799	Down
Ndst1	Oligodendrocyte	1	-0.02367	0.8924	0.9286	None	0.1398	0.03716	0.1183	None	0.1521	0.005464	0.04006	Up
Ndst4	Oligodendrocyte	1	0.02933	0.867	0.9115	None	-0.1257	0.03652	0.1172	None	-0.136	0.003983	0.03123	Down
Ndufa13	Oligodendrocyte	1	0.1097	0.1617	0.3394	None	-0.1565	0.04639	0.1366	None	-0.2586	0.0006439	0.007028	Down
Ndufa2	Oligodendrocyte	1	0.1866	0.003517	0.02898	Up	0.04696	0.3636	0.511	None	-0.1346	0.02929	0.1462	None
Ndufb2	Oligodendrocyte	1	0.2152	0.001774	0.01722	Up	0.1187	0.08116	0.2014	None	-0.1112	0.1239	0.3749	None
Ndufb9	Oligodendrocyte	1	0.1237	0.2922	0.4795	None	-0.09421	0.2658	0.4241	None	-0.244	0.0004293	0.004924	Down
Ndufs2	Oligodendrocyte	1	0.2172	0.001821	0.01753	Up	0.1615	0.02515	0.09162	None	-0.06006	0.5683	0.813	None
Ndufs7	Oligodendrocyte	1	0.1457	0.2042	0.3887	None	-0.09529	0.1715	0.3214	None	-0.2692	0.0002167	0.00273	Down
Neat1	Oligodendrocyte	1	-0.3859	1.055e-10	6.536e-09	Down	-0.4216	5.431e-22	4.785e-20	Down	-0.09636	0.0001389	0.001851	None
Nectin1	Oligodendrocyte	1	-0.2369	0.0009571	0.01077	Down	0.2687	0.0002789	0.002781	Up	0.4919	7.012e-13	4.607e-11	Up
Nek7	Oligodendrocyte	1	0.05164	0.03587	0.1416	None	0.4062	2.204e-06	3.854e-05	Up	0.3344	0.000978	0.009967	Up
Neo1	Oligodendrocyte	1	0.3878	3.946e-05	0.0007675	Up	0.8724	9.884e-22	8.601e-20	Up	0.5052	6.912e-09	2.386e-07	Up
Nfasc	Oligodendrocyte	1	-0.1435	0.3101	0.496	None	0.117	0.2648	0.423	None	0.3054	0.002348	0.02042	Up
Nfe2l3	Oligodendrocyte	1	-0.2971	0.006045	0.04237	Down	0.02818	0.009174	0.04447	None	0.3322	0.001264	0.01234	Up
Nfib	Oligodendrocyte	1	0.04862	0.507	0.6595	None	-0.3106	0.007446	0.03797	Down	-0.3265	0.008801	0.05811	None
Nfkbia	Oligodendrocyte	1	0.7617	7.035e-22	1.484e-19	Up	0.5283	5.502e-12	1.979e-10	Up	-0.2342	0.003111	0.02566	Down
Nhlrc2	Oligodendrocyte	1	-0.1838	0.01471	0.07879	None	-0.213	0.0005388	0.004706	Down	-0.01298	0.8316	0.9383	None
Ninj2	Oligodendrocyte	1	-0.3986	2.242e-05	0.0004729	Down	-0.02638	0.3041	0.4592	None	0.3801	0.0001963	0.002516	Up
Nipal4	Oligodendrocyte	1	-0.3657	6.588e-05	0.001155	Down	-0.1769	0.02765	0.09788	None	0.1854	0.03373	0.1615	None
Nit1	Oligodendrocyte	1	-0.06874	0.1454	0.3204	None	-0.1294	0.002635	0.01703	Down	-0.04878	0.445	0.7374	None
Nkain1	Oligodendrocyte	1	-0.1533	0.08896	0.2406	None	0.4279	8.067e-07	1.541e-05	Up	0.5697	3.906e-08	1.115e-06	Up
Nkain2	Oligodendrocyte	1	0.02462	0.725	0.8156	None	-0.1028	5.199e-17	3.394e-15	Down	-0.1166	1.134e-25	2.476e-23	Down
Nkiras1	Oligodendrocyte	1	-0.0003153	1	1	None	-0.1855	0.01066	0.04932	Down	-0.1722	0.005058	0.03799	Down
Nkx2-2	Oligodendrocyte	1	-0.4221	4.284e-09	2.08e-07	Down	-0.4851	4.676e-11	1.592e-09	Down	-0.05523	0.5357	0.7917	None
Nln	Oligodendrocyte	1	0.07909	0.3639	0.545	None	0.3157	1.52e-07	3.207e-06	Up	0.2153	5.072e-05	0.0007478	Up
Nme7	Oligodendrocyte	1	-0.0129	0.9599	0.9726	None	-0.1812	0.006534	0.03466	Down	-0.1562	0.008312	0.05553	None
Nol4l	Oligodendrocyte	1	-0.262	0.0006757	0.008321	Down	-0.1947	0.03552	0.1151	None	0.105	0.1586	0.4356	None
Nos1ap	Oligodendrocyte	1	0.02889	0.8163	0.8771	None	0.2452	0.008281	0.0412	Up	0.1991	0.01084	0.06869	None
Npas3	Oligodendrocyte	1	-0.5467	2.125e-10	1.258e-08	Down	-0.5872	5.799e-09	1.548e-07	Down	-0.1165	0.3078	0.6167	None
Npat	Oligodendrocyte	1	0.1717	0.03626	0.1425	None	0.294	4.505e-05	0.0005785	Up	0.1279	0.101	0.3304	None
Npc2	Oligodendrocyte	1	0.07125	0.3043	0.491	None	0.2721	0.003613	0.02195	Up	0.1752	0.08508	0.2995	None
Npepps	Oligodendrocyte	1	0.317	5.649e-05	0.00102	Up	0.5459	1.135e-08	2.847e-07	Up	0.2093	0.1466	0.4146	None
Nr1d2	Oligodendrocyte	1	0.08068	0.5317	0.6783	None	0.5521	8.605e-11	2.77e-09	Up	0.4408	7.533e-10	3.268e-08	Up
Nr6a1	Oligodendrocyte	1	-0.2702	0.005536	0.04007	Down	-0.03335	0.04094	0.1267	None	0.2209	0.05307	0.2212	None
Nrbp2	Oligodendrocyte	1	-0.5177	0.0003185	0.004565	Down	-0.04558	0.3827	0.5287	None	0.4813	8.5e-06	0.0001526	Up
Nrd1	Oligodendrocyte	1	0.4202	2.128e-05	0.0004516	Up	0.02382	0.132	0.274	None	-0.3606	0.0007016	0.007489	Down
Nrip1	Oligodendrocyte	1	0.156	0.1393	0.3122	None	0.287	0.00194	0.01344	Up	0.1162	0.3756	0.6801	None
Nrxn1	Oligodendrocyte	1	0.1344	0.279	0.4674	None	-0.1472	0.146	0.291	None	-0.2798	0.0004682	0.005325	Down
Nrxn2	Oligodendrocyte	1	-0.03497	0.06237	0.195	None	0.4553	4.65e-05	0.0005949	Up	0.4609	1.237e-05	0.0002116	Up
Nrxn3	Oligodendrocyte	1	0.09657	0.01266	0.07114	None	-0.0975	0.03865	0.1219	None	-0.1944	0.000778	0.008175	Down
Nsd1	Oligodendrocyte	1	0.1264	0.001945	0.01844	Up	0.1371	0.001754	0.01235	Up	-0.03923	0.8701	0.95	None
Nsd3	Oligodendrocyte	1	0.2913	0.0004922	0.006439	Up	0.2108	0.01202	0.05361	None	-0.04429	0.6575	0.8626	None
Nsmf	Oligodendrocyte	1	-0.1308	0.009044	0.05657	None	-0.1409	0.006824	0.03558	Down	-0.01564	0.9687	0.9887	None
Nt5c2	Oligodendrocyte	1	0.09131	0.1501	0.3253	None	0.2569	0.0001806	0.0019	Up	0.1501	0.05988	0.2402	None
Nt5c3	Oligodendrocyte	1	0.5912	1.838e-12	1.41e-10	Up	0.7523	1.196e-16	7.269e-15	Up	0.1163	0.3565	0.6617	None
Ntmt1	Oligodendrocyte	1	0.1757	0.008983	0.05641	None	0.1954	0.004054	0.02396	Up	0.01137	0.9734	0.9901	None
Nuak1	Oligodendrocyte	0	-0.1432	0.05957	0.1899	None	-0.1881	0.004437	0.02576	Down	-0.03277	0.4157	0.7106	None
Nucb2	Oligodendrocyte	0	-0.1623	0.0006631	0.008228	Down	-0.271	7.878e-09	2.043e-07	Down				None
Nudc	Oligodendrocyte	0	-0.1239	0.04582	0.163	None	-0.1539	0.006541	0.03466	Down	-0.01267	0.9737	0.9902	None
Nudt3	Oligodendrocyte	1	-0.1797	0.002673	0.02355	Down	-0.09311	0.03063	0.1048	None	0.06834	0.4286	0.7222	None
Nudt4	Oligodendrocyte	1	-0.08565	0.6237	0.7471	None	0.2028	0.09097	0.2163	None	0.2883	0.0007578	0.008	Up
Nup188	Oligodendrocyte	1	0.1515	0.08253	0.2297	None	0.3359	2.524e-05	0.0003422	Up	0.1645	0.03215	0.1563	None
Nup98	Oligodendrocyte	1	-0.09473	0.03464	0.1387	None	0.2042	0.001053	0.008209	Up	0.2579	0.01196	0.07403	None
Nus1	Oligodendrocyte	0	-0.08926	0.214	0.3986	None	-0.1701	0.005869	0.03187	Down	-0.0613	0.2938	0.6012	None
Nvl	Oligodendrocyte	1	0.05931	0.7483	0.8316	None	-0.3423	0.008876	0.04333	Down	-0.372	0.0001596	0.002101	Down
Nxpe4	Oligodendrocyte	1	0.377	5.873e-06	0.0001426	Up	0.3673	1.49e-05	0.0002145	Up	-0.04089	0.8431	0.9418	None
Oaz1	Oligodendrocyte	1	-0.03343	0.7215	0.8131	None	-0.4562	0.000114	0.001269	Down	-0.4038	2.929e-05	0.0004515	Down
Ociad1	Oligodendrocyte	1	0.1053	0.001136	0.01223	Up	-0.08376	0.09413	0.2215	None	-0.1771	0.005658	0.04089	Down
Ocrl	Oligodendrocyte	1	0.3963	0.0002482	0.003731	Up	0.2388	0.02837	0.09965	None	-0.1636	0.1799	0.4662	None
Odf2	Oligodendrocyte	1	0.2358	0.02942	0.1258	None	-0.02011	0.2916	0.4485	None	-0.274	0.005103	0.03809	Down
Ogdh	Oligodendrocyte	1	-0.1711	0.001134	0.01223	Down	-0.03681	0.002862	0.01821	None	0.1024	0.4219	0.716	None
Ogdhl	Oligodendrocyte	1	0.1576	0.05122	0.1733	None	0.4112	7.593e-09	1.99e-07	Up	0.2748	1.763e-05	0.0002917	Up
Olfm1	Oligodendrocyte	1	0.006112	0.8808	0.9211	None	-0.1701	0.005407	0.03001	Down	-0.1724	0.0005621	0.006235	Down
Olfml1	Oligodendrocyte	1	-0.4568	0.0004114	0.005644	Down	0.04057	0.6711	0.7589	None	0.5024	3.665e-06	7.006e-05	Up
Olig1	Oligodendrocyte	1	0.1605	0.3403	0.5239	None	-0.2381	0.09485	0.2227	None	-0.4137	3.745e-05	0.0005682	Down
Olig2	Oligodendrocyte	1	-0.1426	0.1699	0.3498	None	-0.4403	7.711e-09	2.013e-07	Down	-0.3084	7.315e-07	1.592e-05	Down
Opa1	Oligodendrocyte	1	-0.04051	0.08449	0.2328	None	-0.1689	0.004877	0.0278	Down	-0.1188	0.3015	0.6112	None
Osbpl1a	Oligodendrocyte	1	-0.4738	0.001764	0.01718	Down	-0.3213	0.01673	0.06821	None	0.1615	0.0315	0.1542	None
Osbpl6	Oligodendrocyte	1	0.1806	0.003857	0.03099	Up	0.12	0.06929	0.1808	None	-0.07583	0.2711	0.5752	None
Osbpl7	Oligodendrocyte	1	-0.2225	0.1112	0.2725	None	-1.101	1.185e-22	1.099e-20	Down	-0.8353	1.301e-20	2.002e-18	Down
Otud4	Oligodendrocyte	1	-0.1881	0.03243	0.1335	None	0.0392	0.8647	0.902	None	0.214	0.002325	0.02028	Up
Otud7a	Oligodendrocyte	1	0.2641	0.04993	0.1712	None	0.6988	9.282e-20	7.051e-18	Up	0.4571	2.09e-15	1.885e-13	Up
Otud7b	Oligodendrocyte	1	0.2067	1.678e-05	0.0003641	Up	0.15	0.007459	0.03799	Up	-0.08216	0.09231	0.3134	None
Otulin	Oligodendrocyte	1	-0.3221	0.01626	0.08474	None	-0.5862	8.429e-06	0.000132	Down	-0.2501	0.03562	0.168	None
P2rx4	Oligodendrocyte	0	-0.169	0.09014	0.2427	None	-0.2526	0.006612	0.03486	Down	-0.0865	0.4665	0.7496	None
P4ha1	Oligodendrocyte	1	0.2808	0.002548	0.0226	Up	0.4316	8.44e-07	1.604e-05	Up	0.16	0.07893	0.2849	None
Pabpn1	Oligodendrocyte	1	-0.2612	0.03612	0.1423	None	-0.3948	0.001907	0.01323	Down	-0.1353	0.4375	0.7304	None
Pacrg	Oligodendrocyte	1	-0.4282	2.4e-08	9.938e-07	Down	-0.489	6.067e-14	2.707e-12	Down	-0.08884	0.05468	0.2253	None
Padi2	Oligodendrocyte	1	-0.1246	0.185	0.3661	None	-0.4295	0.0005513	0.00478	Down	-0.2766	0.007102	0.04914	Down
Pak1	Oligodendrocyte	1	-0.1972	0.04205	0.1554	None	0.2585	0.0001526	0.00165	Up	0.4362	1.456e-06	3.014e-05	Up
Pak2	Oligodendrocyte	1	0.4485	0.0007063	0.00856	Up	0.3016	0.01109	0.05089	None	-0.1295	0.4517	0.7407	None
Pak3	Oligodendrocyte	1	0.008119	0.1235	0.2895	None	-0.1608	0.03189	0.1078	None	-0.1727	0.005475	0.04006	Down
Pak7	Oligodendrocyte	1	-0.4816	1.186e-06	3.435e-05	Down	-0.4527	7.885e-09	2.043e-07	Down	0.00437	0.3351	0.6439	None
Pakap	Oligodendrocyte	1	-0.2239	0.001378	0.01431	Down	0.9433	3.199e-20	2.622e-18	Up	1.203	2.218e-56	5.002e-53	Up
Pan2	Oligodendrocyte	0	-0.1997	0.003606	0.02949	Down	-0.1607	0.02174	0.08262	None	0.02839	0.7931	0.9239	None
Pan3	Oligodendrocyte	1	-0.02405	0.09951	0.2567	None	0.3285	0.0004162	0.003845	Up	0.3469	0.002999	0.02484	Up
Pantr1	Oligodendrocyte	1	0.4383	1.462e-06	4.13e-05	Up	0.3803	3.842e-05	0.0005015	Up	-0.07027	0.6279	0.8474	None
Papss1	Oligodendrocyte	1	-0.1081	0.3236	0.5093	None	0.2268	0.001092	0.008457	Up	0.3425	1.28e-05	0.0002183	Up
Paqr8	Oligodendrocyte	1	1.178	1.84e-19	2.958e-17	Up	0.9391	1.479e-13	6.169e-12	Up	-0.3105	0.02265	0.1209	None
Pard3b	Oligodendrocyte	1	0.03737	0.3391	0.5228	None	0.3565	1.097e-08	2.781e-07	Up	0.2844	1.199e-07	3.097e-06	Up
Paxbp1	Oligodendrocyte	1	0.1806	0.02652	0.1182	None	-0.2308	0.175	0.3261	None	-0.3831	7.265e-05	0.001039	Down
Paxx	Oligodendrocyte	1	0.08621	0.298	0.485	None	0.3477	3.66e-05	0.0004832	Up	0.2468	0.00208	0.01855	Up
Pbx3	Oligodendrocyte	1	0.2217	0.04752	0.1661	None	-0.5777	1.791e-07	3.714e-06	Down	-0.7661	1.086e-16	1.131e-14	Down
Pcbp1	Oligodendrocyte	1	0.1461	0.03162	0.1317	None	-0.05558	0.5299	0.6499	None	-0.1978	0.0001161	0.001572	Down
Pcca	Oligodendrocyte	1	0.399	0.0001101	0.001817	Up	0.3964	0.0006888	0.005781	Up	-0.05444	0.5855	0.8227	None
Pcdh11x	Oligodendrocyte	1	0.2782	0.0007843	0.009353	Up	0.3399	7.785e-07	1.497e-05	Up	0.06326	0.3132	0.6226	None
Pcdh15	Oligodendrocyte	1	-0.04327	0.3465	0.5302	None	0.3881	0.0004543	0.004113	Up	0.4039	9.803e-05	0.001343	Up
Pcdh7	Oligodendrocyte	1	0.2434	0.002649	0.02339	Up	0.2633	0.0005038	0.004462	Up	0.05431	0.5664	0.8122	None
Pcdh9	Oligodendrocyte	1	0.02577	0.4098	0.5823	None	-0.1695	4.595e-19	3.409e-17	Down	-0.1866	2.068e-32	6.386e-30	Down
Pcm1	Oligodendrocyte	1	0.3858	0.001758	0.01715	Up	0.1434	0.3973	0.541	None	-0.2581	0.01816	0.1017	None
Pcmtd1	Oligodendrocyte	1	0.1564	0.0491	0.1697	None	0.1709	0.002838	0.01808	Up	0.05151	0.3965	0.6956	None
Pcolce2	Oligodendrocyte	1	0.6919	1.953e-10	1.177e-08	Up	1.296	5.192e-30	7.32e-28	Up	0.6032	2.012e-08	6.392e-07	Up
Pcsk1n	Oligodendrocyte	1	0.305	0.0008437	0.009836	Up	-0.1136	0.1429	0.2874	None	-0.4234	2.503e-06	4.881e-05	Down
Pcx	Oligodendrocyte	1	-0.106	0.3485	0.5315	None	-0.2154	0.003376	0.0209	Down	-0.09939	0.02292	0.122	None
Pcyt1a	Oligodendrocyte	1	-0.01291	0.01194	0.06801	None	0.1079	0.004617	0.02654	Up	0.1066	0.3128	0.622	None
Pcyt1b	Oligodendrocyte	1	0.4607	1.417e-05	0.0003198	Up	0.147	0.04657	0.1369	None	-0.3081	0.005342	0.03942	Down
Pcyt2	Oligodendrocyte	1	0.5106	0.0002289	0.003479	Up	0.5335	0.0002205	0.002246	Up	0.1095	0.07568	0.2773	None
Pdcd11	Oligodendrocyte	1	0.07865	0.0002872	0.004215	None	0.1296	0.002075	0.01409	Up	0.06476	0.2112	0.5103	None
Pde4a	Oligodendrocyte	0	-0.2005	0.005623	0.04042	Down	-0.1547	0.04541	0.1348	None	0.02549	0.689	0.8785	None
Pde4b	Oligodendrocyte	1	-0.2077	1.917e-19	3.01e-17	Down	-0.3769	8.913e-59	5.236e-56	Down	-0.1597	6.341e-16	5.959e-14	Down
Pde4dip	Oligodendrocyte	1	0.3441	0.009041	0.05657	None	0.4389	7.495e-05	0.0009001	Up	0.1099	0.4061	0.7028	None
Pde8a	Oligodendrocyte	1	-0.3008	0.05612	0.1826	None	0.2623	0.107	0.2407	None	0.5349	3.066e-06	5.928e-05	Up
Pdgfa	Oligodendrocyte	1	0.2282	0.01329	0.07359	None	-0.01666	0.4534	0.5881	None	-0.274	0.0006582	0.00715	Down
Pdgfc	Oligodendrocyte	1	0.1222	0.1482	0.3238	None	0.3167	2.127e-05	0.0002963	Up	0.1997	0.004689	0.03569	Up
Pdia3	Oligodendrocyte	1	-0.08319	0.6554	0.7686	None	-0.3326	0.001046	0.008167	Down	-0.2117	0.009	0.05907	None
Pdia4	Oligodendrocyte	0	-0.1433	0.02997	0.1272	None	-0.1704	0.0101	0.04779	Down	-0.009125	0.9713	0.9898	None
Pdia6	Oligodendrocyte	1	-0.1744	0.07297	0.2136	None	-0.5698	7.169e-11	2.329e-09	Down	-0.3673	2.93e-07	6.824e-06	Down
Pdk2	Oligodendrocyte	1	0.3611	2.889e-08	1.168e-06	Up	0.2611	1.871e-05	0.0002649	Up	-0.1201	0.07302	0.272	None
Pdk4	Oligodendrocyte	1	0.5482	4.863e-19	7.46e-17	Up	0.6284	8.873e-20	6.873e-18	Up	0.03377	0.07396	0.2739	None
Pdpk1	Oligodendrocyte	1	-0.09103	0.02019	0.09805	None	0.1903	0.0007896	0.006513	Up	0.2687	0.001122	0.01117	Up
Pdxk	Oligodendrocyte	1	0.4327	4.955e-08	1.922e-06	Up	0.512	2.892e-10	9.061e-09	Up	0.1037	0.307	0.6163	None
Pebp1	Oligodendrocyte	1	-0.2843	0.01983	0.09717	None	-0.4776	1.07e-05	0.0001616	Down	-0.2085	0.04932	0.2098	None
Peg3	Oligodendrocyte	1	0.1096	0.06313	0.1966	None	-0.07423	0.01593	0.06593	None	-0.178	0.006226	0.04404	Down
Per1	Oligodendrocyte	1	0.05741	0.1583	0.3351	None	0.2773	0.0005082	0.004478	Up	0.2197	0.003253	0.02646	Up
Per3	Oligodendrocyte	1	0.3157	2.023e-07	6.728e-06	Up	0.8776	6.07e-33	9.95e-31	Up	0.4887	1.908e-13	1.345e-11	Up
Pex2	Oligodendrocyte	1	-0.0761	0.4343	0.6006	None	-0.2347	0.005665	0.031	Down	-0.1329	0.03306	0.1593	None
Pex5l	Oligodendrocyte	1	-0.05436	0.007284	0.04854	None	-0.2565	2.503e-12	9.286e-11	Down	-0.2282	4.174e-10	1.921e-08	Down
Pfn1	Oligodendrocyte	1	-0.04094	0.6797	0.7847	None	-0.2011	0.0005558	0.004813	Down	-0.1789	0.000244	0.003023	Down
Pgam1	Oligodendrocyte	1	0.2246	0.001446	0.01481	Up	0.09757	0.2051	0.3579	None	-0.1319	0.05719	0.2329	None
Pgap1	Oligodendrocyte	1	-0.01183	0.01654	0.08588	None	-0.2329	0.01817	0.07243	None	-0.2239	0.005468	0.04006	Down
Phactr1	Oligodendrocyte	0	-0.166	0.384	0.5625	None	0.12	0.2287	0.3833	None	0.2813	0.005834	0.04182	Up
Phactr3	Oligodendrocyte	1	0.2954	0.0003031	0.004353	Up	0.6891	6.967e-11	2.274e-09	Up	0.4019	0.0003588	0.00418	Up
Phactr4	Oligodendrocyte	1	0.8308	2.843e-17	3.763e-15	Up	1.422	1.619e-40	3.357e-38	Up	0.5694	2.814e-07	6.659e-06	Up
Phc2	Oligodendrocyte	1	-0.088	0.09311	0.2472	None	0.2348	0.02359	0.08729	None	0.2939	8.332e-05	0.001168	Up
Phf14	Oligodendrocyte	1	0.2001	0.07954	0.2248	None	-0.08787	0.7985	0.8519	None	-0.314	0.001062	0.01071	Down
Phf20	Oligodendrocyte	1	0.1397	0.0281	0.1222	None	0.5516	1.614e-10	5.103e-09	Up	0.4008	2.714e-05	0.0004232	Up
Phf3	Oligodendrocyte	1	0.1407	0.001807	0.01748	Up	0.1354	0.02325	0.08644	None	0.02082	0.3832	0.6868	None
Phkb	Oligodendrocyte	1	-0.2551	0.04488	0.1607	None	-0.4078	0.0005909	0.005085	Down	-0.1639	0.2037	0.4999	None
Phldb1	Oligodendrocyte	1	-0.8256	6.799e-11	4.33e-09	Down	-0.4734	9.313e-06	0.0001427	Down	0.3291	0.002155	0.01909	Up
Phyhd1	Oligodendrocyte	1	0.6895	1.007e-17	1.387e-15	Up	0.6937	9.762e-18	6.554e-16	Up	-0.04159	0.8616	0.9478	None
Phyhipl	Oligodendrocyte	1	-0.579	1.78e-08	7.604e-07	Down	-0.6401	2.01e-09	5.677e-08	Down	-0.04523	0.03069	0.1512	None
Pi4kb	Oligodendrocyte	1	-0.01588	0.1089	0.2691	None	0.2378	0.01025	0.04815	Up	0.2616	0.001439	0.01371	Up
Piga	Oligodendrocyte	1	-0.337	0.001407	0.01449	Down	-0.6463	3.384e-10	1.037e-08	Down	-0.3193	7.2e-06	0.000131	Down
Pign	Oligodendrocyte	1	-0.07706	0.3308	0.5157	None	-0.3659	0.000108	0.001211	Down	-0.2367	0.003234	0.02637	Down
Pigz	Oligodendrocyte	1	-0.02454	0.001177	0.0126	None	0.3061	6.435e-07	1.25e-05	Up	0.3258	0.0009159	0.009433	Up
Pik3c2a	Oligodendrocyte	1	0.05624	0.1288	0.2971	None	0.3615	1.149e-05	0.0001705	Up	0.2863	0.003567	0.02843	Up
Pik3r1	Oligodendrocyte	1	-0.451	0.001409	0.01449	Down	-0.2271	0.08541	0.2073	None	0.1825	0.2446	0.5498	None
Pik3r3	Oligodendrocyte	1	0.0497	0.3838	0.5625	None	-0.2445	0.02372	0.08766	None	-0.2458	0.0007596	0.008006	Down
Pim3	Oligodendrocyte	1	-0.1567	0.2021	0.3864	None	-0.3571	0.001519	0.01092	Down	-0.2218	0.01053	0.06725	None
Pip4k2a	Oligodendrocyte	1	-0.03034	0.5062	0.6591	None	0.4234	3.594e-10	1.087e-08	Up	0.4582	1.564e-10	7.726e-09	Up
Pja2	Oligodendrocyte	1	-0.166	0.197	0.3797	None	-0.31	0.003662	0.0221	Down	-0.1191	0.1133	0.3544	None
Pkd2l1	Oligodendrocyte	1	-0.06607	0.6215	0.7457	None	-0.2488	0.0069	0.03587	Down	-0.1949	0.01048	0.06701	None
Pkd2l2	Oligodendrocyte	1	-0.1933	0.00198	0.01874	Down	-0.1336	0.01468	0.06199	None	0.07711	0.302	0.6114	None
Pkig	Oligodendrocyte	1	0.3757	6.111e-05	0.001091	Up	-0.0497	0.09648	0.2251	None	-0.4081	2.58e-05	0.0004056	Down
[truncated: 6,843 more rows]

## Sheet: S4b
CellType	Comparison	Direction	ID	Description	GeneRatio	BgRatio	pvalue	p.adjust	qvalue	geneID	Count
Astrocyte	CD_vs_HC	CD up	GO:0099560	synaptic membrane adhesion	5/191	36/28891	3.82489e-06	0.0107785	0.00926428	Nrxn1/Pcdh17/Mdga2/Lrrc4c/Magi2	5
Astrocyte	CD_vs_HC	CD up	GO:0051402	neuron apoptotic process	11/191	369/28891	3.78775e-05	0.0251375	0.021606	Kcnma1/Usp53/Ubb/Kcnq3/Prodh/Mt1/Gapdh/Mag/Hspd1/Il18/Itsn1	11
Astrocyte	CD_vs_HC	CD up	GO:0009612	response to mechanical stimulus	8/191	189/28891	3.95231e-05	0.0251375	0.021606	Usp53/Asic2/Kcnq3/Nrxn1/Ptpn11/Nfkbia/Il18/Dmd	8
Astrocyte	CD_vs_HC	CD up	GO:0050807	regulation of synapse organization	10/191	309/28891	4.32121e-05	0.0251375	0.021606	Asic2/Nrxn1/Nedd9/Il1rapl1/Sparc/Mdga2/Flrt2/Ywhaz/Itsn1/Magi2	10
Astrocyte	CD_vs_HC	CD up	GO:0048511	rhythmic process	10/191	317/28891	5.35221e-05	0.0251375	0.021606	Ptgds/Zfhx3/Kcnma1/Kcnd2/Per3/Rorb/Klf9/Mat2a/Tef/Rora	10
Astrocyte	CD_vs_HC	CD up	GO:0050803	regulation of synapse structure or activity	10/191	317/28891	5.35221e-05	0.0251375	0.021606	Asic2/Nrxn1/Nedd9/Il1rapl1/Sparc/Mdga2/Flrt2/Ywhaz/Itsn1/Magi2	10
Astrocyte	CD_vs_HC	CD up	GO:0050821	protein stabilization	8/191	202/28891	6.31847e-05	0.0254363	0.0218628	Per3/Cdc37l1/Gapdh/Cryab/Pfn2/Hspd1/Stk4/Ank2	8
Astrocyte	CD_vs_HC	CD up	GO:0048512	circadian behavior	5/191	66/28891	7.72302e-05	0.0272043	0.0233825	Ptgds/Zfhx3/Kcnma1/Kcnd2/Per3	5
Astrocyte	CD_vs_HC	CD up	GO:0007622	rhythmic behavior	5/191	69/28891	9.55773e-05	0.0285873	0.0245711	Ptgds/Zfhx3/Kcnma1/Kcnd2/Per3	5
Astrocyte	CD_vs_HC	CD up	GO:0032259	methylation	9/191	277/28891	0.000101445	0.0285873	0.0245711	Meg3/Kmt2c/Tpmt/Trmt1/Nsd1/Rrp8/Kansl1/Trmt13/Setd2	9
Astrocyte	CD_vs_HC	CD up	GO:0007623	circadian rhythm	8/191	228/28891	0.000146274	0.0374728	0.0322083	Ptgds/Zfhx3/Kcnma1/Kcnd2/Per3/Rorb/Mat2a/Rora	8
Astrocyte	CD_vs_HC	CD up	GO:0006457	protein folding	7/191	173/28891	0.000159797	0.0375258	0.0322538	Fkbp5/Cdc37l1/Cryab/Hspd1/Dnajb4/Dnajc25/Dnajb6	7
Astrocyte	CD_vs_HC	CD up	GO:0046486	glycerolipid metabolic process	10/191	380/28891	0.00023505	0.0477163	0.0410127	Mfsd2a/Gk/Inpp4b/Ocrl/Dpm1/Pgp/Ptpn11/Efr3b/Chpt1/Prdx6	10
Astrocyte	CD_vs_HC	CD up	GO:1901888	regulation of cell junction assembly	8/191	246/28891	0.000245189	0.0477163	0.0410127	Apod/Asic2/Nrxn1/Wdpcp/Il1rapl1/Mdga2/Ptpn11/Flrt2	8
Astrocyte	CD_vs_HC	CD up	GO:0060123	regulation of growth hormone secretion	3/191	19/28891	0.000254922	0.0477163	0.0410127	Ptpn11/Gabbr1/Itsn1	3
Astrocyte	CD_vs_HC	CD up	GO:0031647	regulation of protein stability	9/191	316/28891	0.000270923	0.0477163	0.0410127	Nf2/Per3/Cdc37l1/Gapdh/Cryab/Pfn2/Hspd1/Stk4/Ank2	9
Astrocyte	CD_vs_HC	CD up	GO:0097091	synaptic vesicle clustering	3/191	20/28891	0.000298452	0.0477422	0.041035	Nrxn1/Pcdh17/Magi2	3
Astrocyte	CD_vs_HC	CD up	GO:0006887	exocytosis	10/191	395/28891	0.000319463	0.0477422	0.041035	Ptgds/Kcnq3/Gab2/Il1rapl1/Pfn2/Pex5l/Rab11fip2/Ywhaz/Lin7c/Itsn1	10
Astrocyte	CD_vs_HC	CD up	GO:0018105	peptidyl-serine phosphorylation	9/191	331/28891	0.000379986	0.0477422	0.041035	Camk1d/Nrxn1/Pdk2/Stk32a/Pfn2/Sgk1/Nsd1/Dmd/Stk4	9
Astrocyte	CD_vs_HC	CD up	GO:0034329	cell junction assembly	11/191	481/28891	0.000383052	0.0477422	0.041035	Apod/Asic2/Nrxn1/Wdpcp/Il1rapl1/Pcdh17/Mdga2/Actb/Ptpn11/Flrt2/Magi2	11
Astrocyte	CD_vs_HC	CD up	GO:0030252	growth hormone secretion	3/191	22/28891	0.000399266	0.0477422	0.041035	Ptpn11/Gabbr1/Itsn1	3
Astrocyte	CD_vs_HC	CD up	GO:0045475	locomotor rhythm	3/191	22/28891	0.000399266	0.0477422	0.041035	Zfhx3/Kcnma1/Kcnd2	3
Astrocyte	CD_vs_HC	CD up	GO:0034504	protein localization to nucleus	9/191	335/28891	0.000414504	0.0477422	0.041035	Glul/Apod/Kcnq3/Nf2/Nup98/Nfkbia/Ywhaz/Stk4/Dnajb6	9
Astrocyte	CD_vs_HC	CD up	GO:0009914	hormone transport	10/191	411/28891	0.000436044	0.0477422	0.041035	Glul/Slc3a2/Foxo1/Dio2/Ptpn11/Pex5l/Rab11fip2/Gabbr1/Ywhaz/Itsn1	10
Astrocyte	CD_vs_HC	CD up	GO:0042391	regulation of membrane potential	11/191	491/28891	0.0004549	0.0477422	0.041035	Kcnma1/Usp53/Ubb/Asic2/Kcnq3/Kcnd2/Kcnk1/Nrxn1/Pex5l/Dmd/Ank2	11
Astrocyte	CD_vs_HC	CD up	GO:0006650	glycerophospholipid metabolic process	8/191	272/28891	0.000479087	0.0477422	0.041035	Mfsd2a/Inpp4b/Ocrl/Dpm1/Pgp/Efr3b/Chpt1/Prdx6	8
Astrocyte	CD_vs_HC	CD up	GO:0099054	presynapse assembly	4/191	55/28891	0.00048509	0.0477422	0.041035	Nrxn1/Il1rapl1/Pcdh17/Mdga2	4
Astrocyte	CD_vs_HC	CD up	GO:0015833	peptide transport	9/191	343/28891	0.000491314	0.0477422	0.041035	Glul/Car2/Foxo1/Dio2/Ptpn11/Pex5l/Rab11fip2/Gabbr1/Itsn1	9
Astrocyte	CD_vs_HC	CD up	GO:0018209	peptidyl-serine modification	9/191	343/28891	0.000491314	0.0477422	0.041035	Camk1d/Nrxn1/Pdk2/Stk32a/Pfn2/Sgk1/Nsd1/Dmd/Stk4	9
Astrocyte	CD_vs_HC	CD up	GO:0009410	response to xenobiotic stimulus	9/191	346/28891	0.000522975	0.0483541	0.0415609	Asic2/Kcnq3/Mat2a/Errfi1/Tpmt/Aox1/Sult1a1/Ywhaz/Rora	9
Astrocyte	CD_vs_HC	CD up	GO:0098742	cell-cell adhesion via plasma-membrane adhesion molecules	7/191	211/28891	0.000531929	0.0483541	0.0415609	Nrxn1/Il1rapl1/Pcdh17/Mdga2/Mag/Lrrc4c/Magi2	7
Astrocyte	CD_vs_HC	CD down	GO:0010001	glial cell differentiation	8/124	292/28891	3.95427e-05	0.0324122	0.0273113	Tenm4/Gpr37l1/Afdn/Sox5/Smarca4/Bcan/Olig2/Gpm6b	8
Astrocyte	CD_vs_HC	CD down	GO:0034329	cell junction assembly	10/124	481/28891	4.4789e-05	0.0324122	0.0273113	Gpm6a/Lrrtm3/Pkp4/Map4k4/Afdn/Farp1/Grid2/Mmp14/Setd5/Gpm6b	10
Astrocyte	CD_vs_HC	CD down	GO:0009743	response to carbohydrate	7/124	223/28891	5.20498e-05	0.0324122	0.0273113	Nnat/Sybu/Aqp4/Map4k4/Zfp36l1/Adcy8/Smarca4	7
Astrocyte	CD_vs_HC	CD down	GO:0050803	regulation of synapse structure or activity	8/124	317/28891	7.03399e-05	0.0324122	0.0273113	Grin2b/Gpm6a/Sybu/Lrrtm3/Afdn/Farp1/Grid2/Setd5	8
Astrocyte	CD_vs_HC	CD down	GO:0071322	cellular response to carbohydrate stimulus	6/124	169/28891	9.2573e-05	0.0324122	0.0273113	Sybu/Aqp4/Map4k4/Zfp36l1/Adcy8/Smarca4	6
Astrocyte	CD_vs_HC	CD down	GO:1901888	regulation of cell junction assembly	7/124	246/28891	9.62737e-05	0.0324122	0.0273113	Lrrtm3/Map4k4/Farp1/Grid2/Mmp14/Setd5/Gpm6b	7
Oligodendrocyte	CD_vs_HC	CD up	GO:0006457	protein folding	21/500	173/28891	3.22283e-12	1.31652e-08	1.08389e-08	Fkbp5/Hsp90ab1/Cryab/Hsp90aa1/Hspa8/Dnaja1/Hsph1/Hspa4/Ahsa1/Chordc1/Cdc37l1/Fkbp4/Ptges3/Dnajb6/Hspa9/Hspd1/Dnajb4/Cct3/Cct6a/Cct7/Ppia	21
Oligodendrocyte	CD_vs_HC	CD up	GO:0061077	chaperone-mediated protein folding	12/500	66/28891	1.33624e-09	2.72927e-06	2.247e-06	Fkbp5/Hspa8/Hsph1/Chordc1/Fkbp4/Ptges3/Dnajb6/Hspa9/Dnajb4/Cct3/Cct6a/Cct7	12
Oligodendrocyte	CD_vs_HC	CD up	GO:0008380	RNA splicing	27/500	449/28891	2.68514e-08	3.65626e-05	3.01018e-05	Son/Slc38a2/Rsrc1/Hspa8/Srrm1/Rbm5/Prpf4b/Ncbp1/Ivns1abp/Srsf7/Cwf19l2/Rp9/Srsf3/Aar2/Clk1/Sf3b3/Srrm2/Sf3b1/Zmat5/Clk2/Prdx6/Zfp830/Ddx1/Hnrnpa2b1/Supt6/Psip1/Tra2b	27
Oligodendrocyte	CD_vs_HC	CD up	GO:0097193	intrinsic apoptotic signaling pathway	22/500	327/28891	7.62144e-08	7.78339e-05	6.40803e-05	Bcl2l1/Ppp1r13b/Ubb/Ddit4/Dnaja1/Fhit/Pdk2/Plekhf1/Spop/Wwox/Ivns1abp/Hipk1/Cyld/Fbxo7/Herpud1/Rpl26/Hint1/Rpl11/Mdm4/Mcl1/Serinc3/Ppia	22
Oligodendrocyte	CD_vs_HC	CD up	GO:0072332	intrinsic apoptotic signaling pathway by p53 class mediator	11/500	86/28891	2.84196e-07	0.000232189	0.00019116	Ppp1r13b/Ubb/Ddit4/Fhit/Pdk2/Wwox/Hipk1/Rpl26/Hint1/Rpl11/Mdm4	11
Oligodendrocyte	CD_vs_HC	CD up	GO:0050821	protein stabilization	16/500	202/28891	5.33287e-07	0.000363079	0.000298921	Hsp90ab1/Cryab/Smad7/Hsp90aa1/Gapdh/Apbb2/Cdc37l1/Naa16/Per3/Ptges3/Rab3gap1/Rpl11/Hspd1/Cct3/Cct6a/Cct7	16
Oligodendrocyte	CD_vs_HC	CD up	GO:0031647	regulation of protein stability	20/500	316/28891	7.79666e-07	0.000418683	0.000344699	Hsp90ab1/Cryab/Smad7/Hsp90aa1/Hspa8/Gapdh/Cd81/Apbb2/Cdc37l1/Naa16/Per3/Fbxo7/Ptges3/Rab3gap1/Rpl11/Hspd1/Cct3/Ddrgk1/Cct6a/Cct7	20
Oligodendrocyte	CD_vs_HC	CD up	GO:2001233	regulation of apoptotic signaling pathway	24/500	437/28891	8.19942e-07	0.000418683	0.000344699	Bcl2l1/Sgk3/Ubb/Itgav/Dnaja1/Pak2/Slc25a4/Trps1/Plekhf1/Spop/Wwox/Ivns1abp/Cyld/Fbxo7/Herpud1/Rpl26/Ctsl/Rpl11/Mdm4/Higd1a/Mcl1/Gstp1/Serinc3/Ppia	24
Oligodendrocyte	CD_vs_HC	CD up	GO:2001242	regulation of intrinsic apoptotic signaling pathway	15/500	194/28891	1.63047e-06	0.000740053	0.000609282	Bcl2l1/Ubb/Dnaja1/Plekhf1/Spop/Ivns1abp/Cyld/Fbxo7/Herpud1/Rpl26/Rpl11/Mdm4/Mcl1/Serinc3/Ppia	15
Oligodendrocyte	CD_vs_HC	CD up	GO:0042026	protein refolding	6/500	24/28891	2.69317e-06	0.00105336	0.000867223	Cryab/Hsp90aa1/Hspa8/Dnaja1/Hspa9/Hspd1	6
Oligodendrocyte	CD_vs_HC	CD up	GO:0072331	signal transduction by p53 class mediator	13/500	153/28891	2.83646e-06	0.00105336	0.000867223	Ppp1r13b/Ubb/Ddit4/Fhit/Pdk2/Wwox/Hipk1/Rpl26/Hint1/Rpl11/Spred1/Mdm4/Kmt5a	13
Oligodendrocyte	CD_vs_HC	CD up	GO:0043484	regulation of RNA splicing	14/500	187/28891	5.25526e-06	0.00142468	0.00117293	Son/Slc38a2/Hspa8/Srrm1/Rbm5/Ncbp1/Srsf7/Srsf3/Clk1/Sf3b3/Clk2/Prdx6/Hnrnpa2b1/Tra2b	14
Oligodendrocyte	CD_vs_HC	CD up	GO:0006094	gluconeogenesis	10/500	94/28891	5.43426e-06	0.00142468	0.00117293	Gpd1/Slc25a13/Mdh1/Gapdh/Pdk2/Gpt2/Pgam1/Clk2/Zfp692/Soga1	10
Oligodendrocyte	CD_vs_HC	CD up	GO:0019682	glyceraldehyde-3-phosphate metabolic process	5/500	16/28891	5.6778e-06	0.00142468	0.00117293	Gpd1/Mdh1/Gapdh/Pgam1/Taldo1	5
Oligodendrocyte	CD_vs_HC	CD up	GO:0050684	regulation of mRNA processing	12/500	139/28891	5.78381e-06	0.00142468	0.00117293	Son/Hspa8/Srrm1/Rbm5/Ncbp1/Srsf7/Srsf3/Prdx6/Hnrnpa2b1/Dhx36/Supt6/Tra2b	12
Oligodendrocyte	CD_vs_HC	CD up	GO:0018105	peptidyl-serine phosphorylation	19/500	331/28891	6.08757e-06	0.00142468	0.00117293	Sgk1/Sgk3/Hsp90ab1/Mast3/Smad7/Hsp90aa1/Ulk2/Pak2/Pdk2/Rock1/Hipk1/Csnk1g3/Stk38/Clk1/Cnksr3/Camk1d/Akap9/Chuk/Nsd1	19
Oligodendrocyte	CD_vs_HC	CD up	GO:0042177	negative regulation of protein catabolic process	11/500	117/28891	6.23079e-06	0.00142468	0.00117293	Cst3/Hsp90ab1/Azin1/Fhit/Sf3b3/Mgat3/Sirt2/Rpl11/Mdm4/Uchl5/Ddrgk1	11
Oligodendrocyte	CD_vs_HC	CD up	GO:0000375	RNA splicing, via transesterification reactions	18/500	304/28891	6.97516e-06	0.00142468	0.00117293	Son/Rsrc1/Hspa8/Srrm1/Rbm5/Prpf4b/Ncbp1/Srsf7/Cwf19l2/Srsf3/Aar2/Sf3b3/Srrm2/Sf3b1/Prdx6/Hnrnpa2b1/Psip1/Tra2b	18
Oligodendrocyte	CD_vs_HC	CD up	GO:0000377	RNA splicing, via transesterification reactions with bulged adenosine as nucleophile	18/500	304/28891	6.97516e-06	0.00142468	0.00117293	Son/Rsrc1/Hspa8/Srrm1/Rbm5/Prpf4b/Ncbp1/Srsf7/Cwf19l2/Srsf3/Aar2/Sf3b3/Srrm2/Sf3b1/Prdx6/Hnrnpa2b1/Psip1/Tra2b	18
Oligodendrocyte	CD_vs_HC	CD up	GO:0000398	mRNA splicing, via spliceosome	18/500	304/28891	6.97516e-06	0.00142468	0.00117293	Son/Rsrc1/Hspa8/Srrm1/Rbm5/Prpf4b/Ncbp1/Srsf7/Cwf19l2/Srsf3/Aar2/Sf3b3/Srrm2/Sf3b1/Prdx6/Hnrnpa2b1/Psip1/Tra2b	18
Oligodendrocyte	CD_vs_HC	CD up	GO:0019319	hexose biosynthetic process	10/500	98/28891	7.91541e-06	0.00151635	0.0012484	Gpd1/Slc25a13/Mdh1/Gapdh/Pdk2/Gpt2/Pgam1/Clk2/Zfp692/Soga1	10
Oligodendrocyte	CD_vs_HC	CD up	GO:0042176	regulation of protein catabolic process	20/500	369/28891	8.16639e-06	0.00151635	0.0012484	Cst3/Hsp90ab1/Apoe/Ubb/Azin1/Hsp90aa1/Cd81/Snx1/Fhit/Herpud1/Crebrf/Sf3b3/Mgat3/Sirt2/Ppp2r3a/Rpl11/Glmn/Mdm4/Uchl5/Ddrgk1	20
Oligodendrocyte	CD_vs_HC	CD up	GO:0018209	peptidyl-serine modification	19/500	343/28891	1.00886e-05	0.00179182	0.00147519	Sgk1/Sgk3/Hsp90ab1/Mast3/Smad7/Hsp90aa1/Ulk2/Pak2/Pdk2/Rock1/Hipk1/Csnk1g3/Stk38/Clk1/Cnksr3/Camk1d/Akap9/Chuk/Nsd1	19
Oligodendrocyte	CD_vs_HC	CD up	GO:0032200	telomere organization	12/500	150/28891	1.26116e-05	0.00198693	0.00163583	Hsp90aa1/Zfp365/Ptges3/Pot1b/Hnrnpa2b1/Dhx36/Uchl5/Cct3/Ezh1/Ppp1r10/Cct6a/Cct7	12
Oligodendrocyte	CD_vs_HC	CD up	GO:0009895	negative regulation of catabolic process	19/500	349/28891	1.28673e-05	0.00198693	0.00163583	Cst3/Hsp90ab1/Azin1/Ddit4/Fhit/Dbi/Csde1/Sf3b3/Herc1/Mgat3/Sirt2/Rpl11/Mdm4/Dhx36/Mcl1/Uchl5/Mtmr2/Usp30/Ddrgk1	19
Oligodendrocyte	CD_vs_HC	CD up	GO:0044788	modulation by host of viral process	7/500	46/28891	1.33107e-05	0.00198693	0.00163583	Apoe/Hspa8/Vapa/Zdhhc20/Rab5a/Cdc42/Eif2ak4	7
Oligodendrocyte	CD_vs_HC	CD up	GO:0070646	protein modification by small protein removal	11/500	127/28891	1.36827e-05	0.00198693	0.00163583	Usp54/Cyld/Usp48/Senp7/Hint1/Usp46/Otud7b/Uchl5/Cops5/Usp30/Zranb1	11
Oligodendrocyte	CD_vs_HC	CD up	GO:0051348	negative regulation of transferase activity	16/500	260/28891	1.39228e-05	0.00198693	0.00163583	Errfi1/Apoe/Dbndd2/Smad7/Setd7/Dnaja1/Pkig/Chordc1/Stk38/Fbxo7/Rpl11/Spred1/Pot1b/Gstp1/Dusp3/Ppia	16
Oligodendrocyte	CD_vs_HC	CD up	GO:0006123	mitochondrial electron transport, cytochrome c to oxygen	5/500	19/28891	1.44794e-05	0.00198693	0.00163583	Cox4i1/Cox5a/Cox8a/Cox6a1/Cox7a2	5
Oligodendrocyte	CD_vs_HC	CD up	GO:0051054	positive regulation of DNA metabolic process	18/500	321/28891	1.45919e-05	0.00198693	0.00163583	Cst3/Hsp90aa1/Morf4l1/Gli2/Spire1/Smarcd1/Ptges3/Ssbp1/Ccdc117/Cdc42/Pot1b/Hnrnpa2b1/Dhx36/Uchl5/Cct3/Ppp1r10/Cct6a/Cct7	18
Oligodendrocyte	CD_vs_HC	CD up	GO:0009615	response to virus	20/500	389/28891	1.75616e-05	0.00231417	0.00190524	Polr3e/Bcl2l1/Ddit4/Hsp90aa1/Nt5c3/Hspa8/Znfx1/Htra1/Ncbp1/Gli2/Ivns1abp/Traf6/Senp7/Sirt2/Trim35/Ddx1/Dhx36/Eif2ak4/Chuk/Serinc3	20
Oligodendrocyte	CD_vs_HC	CD up	GO:0051607	defense response to virus	18/500	328/28891	1.94648e-05	0.0023746	0.00195499	Polr3e/Bcl2l1/Ddit4/Hsp90aa1/Nt5c3/Hspa8/Znfx1/Htra1/Ncbp1/Traf6/Senp7/Sirt2/Trim35/Ddx1/Dhx36/Eif2ak4/Chuk/Serinc3	18
Oligodendrocyte	CD_vs_HC	CD up	GO:0030900	forebrain development	21/500	425/28891	1.96689e-05	0.0023746	0.00195499	Ubb/Dixdc1/Kcna1/Nde1/Aplp2/Tacc1/Mrtfb/Pcm1/Dbi/Dlc1/Gli2/Dync2h1/Rab3gap1/Herc1/Trappc9/Uqcrq/Atp1a2/Wdr47/Ttc8/Uchl5/Tra2b	21
Oligodendrocyte	CD_vs_HC	CD up	GO:0140546	defense response to symbiont	18/500	329/28891	2.02683e-05	0.0023746	0.00195499	Polr3e/Bcl2l1/Ddit4/Hsp90aa1/Nt5c3/Hspa8/Znfx1/Htra1/Ncbp1/Traf6/Senp7/Sirt2/Trim35/Ddx1/Dhx36/Eif2ak4/Chuk/Serinc3	18
Oligodendrocyte	CD_vs_HC	CD up	GO:0046364	monosaccharide biosynthetic process	10/500	109/28891	2.03454e-05	0.0023746	0.00195499	Gpd1/Slc25a13/Mdh1/Gapdh/Pdk2/Gpt2/Pgam1/Clk2/Zfp692/Soga1	10
Oligodendrocyte	CD_vs_HC	CD up	GO:0006397	mRNA processing	23/500	496/28891	2.19154e-05	0.00248679	0.00204736	Son/Rsrc1/Hspa8/Srrm1/Rbm5/Prpf4b/Ncbp1/Srsf7/Cwf19l2/Srsf3/Aar2/Sf3b3/Srrm2/Sf3b1/Zmat5/Prdx6/Zfp830/Ddx1/Hnrnpa2b1/Dhx36/Supt6/Psip1/Tra2b	23
Oligodendrocyte	CD_vs_HC	CD up	GO:0032206	positive regulation of telomere maintenance	8/500	70/28891	2.80522e-05	0.00309712	0.00254984	Pot1b/Hnrnpa2b1/Dhx36/Uchl5/Cct3/Ppp1r10/Cct6a/Cct7	8
Oligodendrocyte	CD_vs_HC	CD up	GO:0048024	regulation of mRNA splicing, via spliceosome	10/500	114/28891	3.0077e-05	0.00321417	0.00264621	Son/Hspa8/Srrm1/Rbm5/Ncbp1/Srsf7/Srsf3/Prdx6/Hnrnpa2b1/Tra2b	10
Oligodendrocyte	CD_vs_HC	CD up	GO:0009266	response to temperature stimulus	12/500	164/28891	3.07937e-05	0.00321417	0.00264621	Hsp90ab1/Cryab/Hsp90aa1/Dnaja1/Slc25a27/Chordc1/Pcsk1n/Wdr47/Dhx36/Psip1/Eif2ak4/Lipa	12
Oligodendrocyte	CD_vs_HC	CD up	GO:0031400	negative regulation of protein modification process	22/500	473/28891	3.14729e-05	0.00321417	0.00264621	Errfi1/Apoe/Dbndd2/Smad7/Dnaja1/Hspa4/Pkig/Chordc1/Dbi/Rock1/Ivns1abp/Stk38/Fbxo7/Cnksr3/Sirt2/Rpl11/Ppp5c/Spred1/Gstp1/Dusp3/Klf15/Ppia	22
Oligodendrocyte	CD_vs_HC	CD up	GO:0022900	electron transport chain	10/500	116/28891	3.4959e-05	0.00348311	0.00286762	Gpd1/Slc25a13/Cox4i1/Cox5a/Cox8a/Cox6a1/Uqcrq/Cox7a2/Ndufs2/Enox2	10
Oligodendrocyte	CD_vs_HC	CD up	GO:1904358	positive regulation of telomere maintenance via telomere lengthening	6/500	37/28891	3.84436e-05	0.00364821	0.00300355	Pot1b/Hnrnpa2b1/Dhx36/Cct3/Cct6a/Cct7	6
Oligodendrocyte	CD_vs_HC	CD up	GO:0034333	adherens junction assembly	4/500	12/28891	3.92952e-05	0.00364821	0.00300355	Smad7/Jam3/Pak2/Hipk1	4
Oligodendrocyte	CD_vs_HC	CD up	GO:0046166	glyceraldehyde-3-phosphate biosynthetic process	4/500	12/28891	3.92952e-05	0.00364821	0.00300355	Gpd1/Mdh1/Gapdh/Pgam1	4
Oligodendrocyte	CD_vs_HC	CD up	GO:0010833	telomere maintenance via telomere lengthening	8/500	75/28891	4.64912e-05	0.00418424	0.00344486	Hsp90aa1/Ptges3/Pot1b/Hnrnpa2b1/Dhx36/Cct3/Cct6a/Cct7	8
Oligodendrocyte	CD_vs_HC	CD up	GO:0000723	telomere maintenance	11/500	145/28891	4.71175e-05	0.00418424	0.00344486	Hsp90aa1/Zfp365/Ptges3/Pot1b/Hnrnpa2b1/Dhx36/Uchl5/Cct3/Ppp1r10/Cct6a/Cct7	11
Oligodendrocyte	CD_vs_HC	CD up	GO:0019318	hexose metabolic process	15/500	259/28891	5.16033e-05	0.00448509	0.00369255	Gpd1/Slc25a13/Pdk4/Mdh1/Gapdh/Apod/Pdk2/Gpt2/Pgam1/Clk2/Pmm1/Man2b1/Zfp692/Soga1/Lipa	15
Oligodendrocyte	CD_vs_HC	CD up	GO:0031098	stress-activated protein kinase signaling cascade	15/500	261/28891	5.63072e-05	0.00473592	0.00389906	Errfi1/Cryab/Dixdc1/Dnaja1/Fgf12/Cyld/Traf6/Mapk10/Sash1/Cdc42/Gstp1/Dusp3/Cops5/Mink1/Ppia	15
Oligodendrocyte	CD_vs_HC	CD up	GO:0002181	cytoplasmic translation	11/500	148/28891	5.68078e-05	0.00473592	0.00389906	Rpl6/Ncbp1/Rps3a1/Csde1/Rpl26/Rplp1/Rpl11/Rps21/Rplp2/Dhx36/Eif2ak4	11
Oligodendrocyte	CD_vs_HC	CD up	GO:2001235	positive regulation of apoptotic signaling pathway	12/500	177/28891	6.48385e-05	0.00526498	0.00433463	Ubb/Pak2/Trps1/Plekhf1/Spop/Wwox/Cyld/Rpl26/Ctsl/Rpl11/Mcl1/Serinc3	12
Oligodendrocyte	CD_vs_HC	CD up	GO:0022411	cellular component disassembly	21/500	462/28891	6.57317e-05	0.00526498	0.00433463	Sgk1/Cst3/Ddit4/Ulk2/Hspa8/Slc25a4/Adgrb3/Plekhh2/Tgfb3/Calm1/Lamc1/Smarcd1/Fbxo7/Vmp1/Wdr47/Dusp3/Gspt1/Fyco1/Usp30/Ddrgk1/Atg4d	21
Oligodendrocyte	CD_vs_HC	CD up	GO:0016236	macroautophagy	15/500	268/28891	7.58647e-05	0.00595976	0.00490663	Ulk2/Sesn1/Slc25a4/Calm1/Traf6/Rab3gap1/Vmp1/Vti1b/Zfyve26/Fyco1/Usp30/Ddrgk1/Atg4c/Sesn3/Atg4d	15
Oligodendrocyte	CD_vs_HC	CD up	GO:0051402	neuron apoptotic process	18/500	369/28891	8.95278e-05	0.00677704	0.0055795	Bcl2l1/Hsp90ab1/Apoe/Pla2g3/Ubb/Mt1/Hsph1/Gapdh/Slc25a27/Hspa4/Tgfb3/Rock1/Fbxo7/Ptges3/Alkbh1/Hspd1/Cdc42/Mcl1	18
Oligodendrocyte	CD_vs_HC	CD up	GO:0016579	protein deubiquitination	9/500	105/28891	8.95863e-05	0.00677704	0.0055795	Usp54/Cyld/Usp48/Usp46/Otud7b/Uchl5/Cops5/Usp30/Zranb1	9
Oligodendrocyte	CD_vs_HC	CD up	GO:0022904	respiratory electron transport chain	9/500	106/28891	9.64215e-05	0.00716149	0.00589601	Gpd1/Slc25a13/Cox4i1/Cox5a/Cox8a/Cox6a1/Uqcrq/Cox7a2/Ndufs2	9
Oligodendrocyte	CD_vs_HC	CD up	GO:0042326	negative regulation of phosphorylation	18/500	372/28891	9.9127e-05	0.00723096	0.00595321	Errfi1/Apoe/Dbndd2/Smad7/Dnaja1/Hspa4/Pkig/Chordc1/Rock1/Stk38/Fbxo7/Cnksr3/Sirt2/Ppp5c/Spred1/Gstp1/Dusp3/Ppia	18
Oligodendrocyte	CD_vs_HC	CD up	GO:2001252	positive regulation of chromosome organization	9/500	107/28891	0.000103689	0.00743101	0.00611791	Resf1/Pot1b/Hnrnpa2b1/Dhx36/Uchl5/Cct3/Ppp1r10/Cct6a/Cct7	9
Oligodendrocyte	CD_vs_HC	CD up	GO:0046184	aldehyde biosynthetic process	5/500	28/28891	0.000107621	0.00757984	0.00624044	Gpd1/Mdh1/Gapdh/Pdxk/Pgam1	5
Oligodendrocyte	CD_vs_HC	CD up	GO:0001933	negative regulation of protein phosphorylation	17/500	342/28891	0.000111271	0.0077041	0.00634274	Errfi1/Apoe/Dbndd2/Smad7/Dnaja1/Hspa4/Pkig/Chordc1/Stk38/Fbxo7/Cnksr3/Sirt2/Ppp5c/Spred1/Gstp1/Dusp3/Ppia	17
Oligodendrocyte	CD_vs_HC	CD up	GO:0019646	aerobic electron transport chain	7/500	64/28891	0.000118177	0.00799058	0.0065786	Cox4i1/Cox5a/Cox8a/Cox6a1/Uqcrq/Cox7a2/Ndufs2	7
Oligodendrocyte	CD_vs_HC	CD up	GO:0051403	stress-activated MAPK cascade	14/500	248/28891	0.000119321	0.00799058	0.0065786	Cryab/Dixdc1/Dnaja1/Fgf12/Cyld/Traf6/Mapk10/Sash1/Cdc42/Gstp1/Dusp3/Cops5/Mink1/Ppia	14
Oligodendrocyte	CD_vs_HC	CD up	GO:0006091	generation of precursor metabolites and energy	21/500	484/28891	0.000125829	0.00829052	0.00682554	Gpd1/Ddit4/Slc25a13/Mdh1/Cox4i1/Gapdh/Cox5a/Cox8a/Ptges3/Chchd10/Cox6a1/Uqcrq/Cox7a2/Pgam1/Ndufs2/Ndufb2/Taldo1/Enox2/Ppp1r2/Ndufa2/Lipa	21
Oligodendrocyte	CD_vs_HC	CD up	GO:0072594	establishment of protein localization to organelle	20/500	452/28891	0.000139735	0.00906058	0.00745952	Hsp90ab1/Nfkbia/Hsp90aa1/Hspa8/Dnaja1/Apod/Hspa4/Pkig/Vps8/Fbxo7/Herpud1/Sec62/Rab3gap1/Rab10/Vps37a/Hspd1/Pot1b/Cct3/Cct6a/Cct7	20
Oligodendrocyte	CD_vs_HC	CD up	GO:0042157	lipoprotein metabolic process	10/500	137/28891	0.000142425	0.00909074	0.00748435	Apoe/Itgav/Glul/Abhd17b/Apod/Dbi/Dpm1/Rab3gap1/Zdhhc20/Lipa	10
Oligodendrocyte	CD_vs_HC	CD up	GO:0072384	organelle transport along microtubule	8/500	88/28891	0.000145642	0.00915303	0.00753564	Ubb/Nde1/Bicd1/Dync1i1/Cdc42/Arhgap21/Ap3m1/Fyco1	8
Oligodendrocyte	CD_vs_HC	CD up	GO:0005996	monosaccharide metabolic process	15/500	287/28891	0.000161671	0.0100065	0.00823828	Gpd1/Slc25a13/Pdk4/Mdh1/Gapdh/Apod/Pdk2/Gpt2/Pgam1/Clk2/Pmm1/Man2b1/Zfp692/Soga1/Lipa	15
Oligodendrocyte	CD_vs_HC	CD up	GO:0006006	glucose metabolic process	13/500	225/28891	0.000164689	0.0100411	0.00826678	Gpd1/Slc25a13/Pdk4/Mdh1/Gapdh/Apod/Pdk2/Gpt2/Pgam1/Clk2/Zfp692/Soga1/Lipa	13
Oligodendrocyte	CD_vs_HC	CD up	GO:0006979	response to oxidative stress	18/500	389/28891	0.000172623	0.0103701	0.00853761	Cst3/Apoe/Cryab/Rcan2/Sesn1/Apod/Pdk2/Scly/Mgat3/Sirt2/Ndufs2/Prdx6/Gstp1/Psip1/Hmox2/Chuk/Sesn3/Ppia	18
Oligodendrocyte	CD_vs_HC	CD up	GO:0051702	biological process involved in interaction with symbiont	9/500	115/28891	0.000180098	0.0106623	0.00877823	Apoe/Hspa8/Gapdh/Vapa/Zdhhc20/Rab5a/Hspd1/Cdc42/Eif2ak4	9
Oligodendrocyte	CD_vs_HC	CD up	GO:0016053	organic acid biosynthetic process	16/500	324/28891	0.000189152	0.0110384	0.00908785	Ptgds/Errfi1/Pla2g3/Bcat1/Acaca/Glul/Pdk4/Cyp27a1/Ptges3/Csad/Sirt2/Mthfd1l/Gstp1/Tecr/Gamt/Elovl5	16
Oligodendrocyte	CD_vs_HC	CD up	GO:0007264	small GTPase mediated signal transduction	19/500	428/28891	0.000195437	0.0112445	0.00925754	Apoe/Rhou/Phactr4/Itgav/Kctd13/Garnl3/Ralbp1/Dlc1/Rock1/Sh2b2/Arhgap5/Kndc1/Git2/Dock9/Cdc42/Mmd2/Lipa/Chuk/Dnm2	19
Oligodendrocyte	CD_vs_HC	CD up	GO:0032868	response to insulin	14/500	262/28891	0.000211126	0.0119785	0.00986182	Sgk1/Ptpn11/Rab31/Stxbp3/Pdk4/Gkap1/Pdk2/Scly/Srsf3/Sh2b2/Rab10/Soga1/Klf15/Sesn3	14
Oligodendrocyte	CD_vs_HC	CD up	GO:0021695	cerebellar cortex development	7/500	71/28891	0.000228034	0.0124203	0.0102255	Ptpn11/Dixdc1/Zfp365/Gli2/Herc1/Kndc1/Uqcrq	7
Oligodendrocyte	CD_vs_HC	CD up	GO:0046324	regulation of glucose import	7/500	71/28891	0.000228034	0.0124203	0.0102255	Ptpn11/Adipor2/Stxbp3/Slc25a27/Ahi1/Sh2b2/Klf15	7
Oligodendrocyte	CD_vs_HC	CD up	GO:0060612	adipose tissue development	7/500	71/28891	0.000228034	0.0124203	0.0102255	Arid5b/Arrdc3/Ubb/Sox8/Selenom/Rasal2/Lipa	7
Oligodendrocyte	CD_vs_HC	CD up	GO:0051085	chaperone cofactor-dependent protein refolding	5/500	33/28891	0.000242034	0.0130093	0.0107105	Hspa8/Hsph1/Ptges3/Hspa9/Dnajb4	5
Oligodendrocyte	CD_vs_HC	CD up	GO:0006469	negative regulation of protein kinase activity	12/500	204/28891	0.000246858	0.0130963	0.0107821	Errfi1/Apoe/Dbndd2/Dnaja1/Pkig/Chordc1/Stk38/Fbxo7/Spred1/Gstp1/Dusp3/Ppia	12
Oligodendrocyte	CD_vs_HC	CD up	GO:0006119	oxidative phosphorylation	10/500	147/28891	0.000253101	0.0132553	0.010913	Cox4i1/Cox5a/Cox8a/Chchd10/Cox6a1/Uqcrq/Cox7a2/Ndufs2/Ndufb2/Ndufa2	10
Oligodendrocyte	CD_vs_HC	CD up	GO:0010506	regulation of autophagy	15/500	300/28891	0.00026061	0.0134758	0.0110946	Ulk2/Sesn1/Slc25a4/Plekhf1/Rock1/Fbxo7/Rab3gap1/Herc1/Ccny/Sirt2/Mcl1/Soga1/Fyco1/Usp30/Sesn3	15
Oligodendrocyte	CD_vs_HC	CD up	GO:0032204	regulation of telomere maintenance	8/500	96/28891	0.000266432	0.0135908	0.0111892	Pot1b/Hnrnpa2b1/Dhx36/Uchl5/Cct3/Ppp1r10/Cct6a/Cct7	8
Oligodendrocyte	CD_vs_HC	CD up	GO:2001244	positive regulation of intrinsic apoptotic signaling pathway	7/500	73/28891	0.000271223	0.0135908	0.0111892	Ubb/Plekhf1/Spop/Rpl26/Rpl11/Mcl1/Serinc3	7
Oligodendrocyte	CD_vs_HC	CD up	GO:0050746	regulation of lipoprotein metabolic process	4/500	19/28891	0.000279467	0.0135908	0.0111892	Itgav/Apod/Dbi/Rab3gap1	4
Oligodendrocyte	CD_vs_HC	CD up	GO:0050862	positive regulation of T cell receptor signaling pathway	4/500	19/28891	0.000279467	0.0135908	0.0111892	Cd81/Cyld/Usp46/Lipa	4
Oligodendrocyte	CD_vs_HC	CD up	GO:0070200	establishment of protein localization to telomere	4/500	19/28891	0.000279467	0.0135908	0.0111892	Pot1b/Cct3/Cct6a/Cct7	4
Oligodendrocyte	CD_vs_HC	CD up	GO:1902904	negative regulation of supramolecular fiber organization	11/500	178/28891	0.000290987	0.0139845	0.0115134	Sgk1/Apoe/Cryab/Ctnna2/Hspa8/Pak2/Rhpn2/Plekhh2/Dlc1/Fkbp4/Wdr47	11
Oligodendrocyte	CD_vs_HC	CD up	GO:0031623	receptor internalization	10/500	150/28891	0.000297785	0.0141448	0.0116453	Rab31/Ankrd13a/Cd81/Snx1/Ahi1/Sirt2/Usp46/Rab5a/Mtmr2/Dnm2	10
Oligodendrocyte	CD_vs_HC	CD up	GO:0007044	cell-substrate junction assembly	8/500	98/28891	0.000306844	0.0144076	0.0118617	Ptpn11/Itgav/Apod/Dlc1/Lamc1/Rock1/Fermt2/Dusp3	8
Oligodendrocyte	CD_vs_HC	CD up	GO:0010970	transport along microtubule	11/500	180/28891	0.000320221	0.014764	0.0121551	Ubb/Nde1/Hspa8/Pcm1/Dync2h1/Bicd1/Dync1i1/Cdc42/Arhgap21/Ap3m1/Fyco1	11
Oligodendrocyte	CD_vs_HC	CD up	GO:0043524	negative regulation of neuron apoptotic process	12/500	210/28891	0.000321663	0.014764	0.0121551	Bcl2l1/Hsp90ab1/Apoe/Pla2g3/Mt1/Hsph1/Slc25a27/Tgfb3/Rock1/Fbxo7/Alkbh1/Hspd1	12
Oligodendrocyte	CD_vs_HC	CD up	GO:0007254	JNK cascade	11/500	181/28891	0.000335741	0.0152389	0.0125461	Dixdc1/Dnaja1/Fgf12/Cyld/Traf6/Mapk10/Cdc42/Gstp1/Dusp3/Cops5/Mink1	11
Oligodendrocyte	CD_vs_HC	CD up	GO:1900117	regulation of execution phase of apoptosis	4/500	20/28891	0.000344576	0.0154681	0.0127348	Bcl2l1/Pak2/Dlc1/Sirt2	4
Oligodendrocyte	CD_vs_HC	CD up	GO:0030100	regulation of endocytosis	16/500	344/28891	0.000368505	0.0161982	0.0133359	Bcl2l1/Apoe/Rab31/Itgav/Ankrd13a/Ahi1/Rock1/Bicd1/Sirt2/Usp46/Cdc42/Pot1b/Arhgap21/Mtmr2/Camk1d/Dnm2	16
Oligodendrocyte	CD_vs_HC	CD up	GO:0043523	regulation of neuron apoptotic process	15/500	310/28891	0.000368772	0.0161982	0.0133359	Bcl2l1/Hsp90ab1/Apoe/Pla2g3/Ubb/Mt1/Hsph1/Slc25a27/Tgfb3/Rock1/Fbxo7/Alkbh1/Hspd1/Cdc42/Mcl1	15
Oligodendrocyte	CD_vs_HC	CD up	GO:0046486	glycerolipid metabolic process	17/500	380/28891	0.000382373	0.016617	0.0136807	Ptpn11/Apoe/Pla2g3/Agmo/Gpd1/Pcyt2/Pcyt1b/Efr3b/Ocrl/Dbi/Pla2g7/Dpm1/Mboat2/Prdx6/Pnpla7/Mtmr2/Lipa	17
Oligodendrocyte	CD_vs_HC	CD up	GO:0032386	regulation of intracellular transport	16/500	346/28891	0.000392659	0.0168843	0.0139008	Ptpn11/Hsp90ab1/Pla2g3/Cryab/Hsp90aa1/Cd81/Apod/Pcm1/Pkig/Rufy3/Crebrf/Ube2j1/Cdc42/Supt6/Rint1/Mtmr2	16
Oligodendrocyte	CD_vs_HC	CD up	GO:0051656	establishment of organelle localization	20/500	491/28891	0.000408543	0.0173844	0.0143125	Ptgds/Pla2g3/Ubb/Nde1/Tacc1/Pcm1/Ahi1/Spire1/Rab3gap1/Bicd1/Trappc9/Sirt2/Dync1i1/Trappc13/Cdc42/Arhgap21/Ap3m1/Tmed9/Cops5/Fyco1	20
Oligodendrocyte	CD_vs_HC	CD up	GO:0048193	Golgi vesicle transport	14/500	281/28891	0.000428706	0.0180543	0.014864	Rab31/Sys1/Snx1/Vapa/Spire1/Rab10/Vti1b/Trappc9/Trappc13/Snx2/Tmed9/Rint1/Mia2/Dnm2	14
Oligodendrocyte	CD_vs_HC	CD up	GO:1905897	regulation of response to endoplasmic reticulum stress	7/500	79/28891	0.000441515	0.0182694	0.0150411	Bcl2l1/Spop/Herpud1/Crebrf/Cops5/Serinc3/Ddrgk1	7
Oligodendrocyte	CD_vs_HC	CD up	GO:0043409	negative regulation of MAPK cascade	11/500	187/28891	0.000442758	0.0182694	0.0150411	Errfi1/Apoe/Ranbp9/Dnaja1/Stk38/Cyld/Cnksr3/Spred1/Gstp1/Dusp3/Ppia	11
Oligodendrocyte	CD_vs_HC	CD up	GO:0070507	regulation of microtubule cytoskeleton organization	10/500	159/28891	0.000473139	0.0190944	0.0157203	Sgk1/Dixdc1/Hsph1/Rock1/Fkbp4/Cyld/Sass6/Bicd1/Wdr47/Akap9	10
Oligodendrocyte	CD_vs_HC	CD up	GO:0042775	mitochondrial ATP synthesis coupled electron transport	7/500	80/28891	0.000476748	0.0190944	0.0157203	Cox4i1/Cox5a/Cox8a/Cox6a1/Uqcrq/Cox7a2/Ndufs2	7
Oligodendrocyte	CD_vs_HC	CD up	GO:0051084	'de novo' post-translational protein folding	5/500	38/28891	0.000476775	0.0190944	0.0157203	Hspa8/Hsph1/Ptges3/Hspa9/Dnajb4	5
Oligodendrocyte	CD_vs_HC	CD up	GO:0150115	cell-substrate junction organization	8/500	105/28891	0.000489501	0.019279	0.0158723	Ptpn11/Itgav/Apod/Dlc1/Lamc1/Rock1/Fermt2/Dusp3	8
Oligodendrocyte	CD_vs_HC	CD up	GO:0034332	adherens junction organization	6/500	58/28891	0.000492733	0.019279	0.0158723	Smad7/Jam3/Pak2/Hipk1/Cdc42/Fermt2	6
Oligodendrocyte	CD_vs_HC	CD up	GO:0010508	positive regulation of autophagy	10/500	160/28891	0.000497042	0.019279	0.0158723	Ulk2/Sesn1/Slc25a4/Plekhf1/Rock1/Fbxo7/Rab3gap1/Ccny/Fyco1/Sesn3	10
Oligodendrocyte	CD_vs_HC	CD up	GO:0044794	positive regulation by host of viral process	4/500	22/28891	0.00050618	0.019279	0.0158723	Apoe/Hspa8/Vapa/Zdhhc20	4
Oligodendrocyte	CD_vs_HC	CD up	GO:0048545	response to steroid hormone	13/500	253/28891	0.000509701	0.019279	0.0158723	Sgk1/Errfi1/Paqr8/Klf9/Ddit4/Dnaja1/Tgfb3/Fkbp4/Crebrf/Ptges3/Ppp5c/Atp1a2/Ddrgk1	13
Oligodendrocyte	CD_vs_HC	CD up	GO:2001234	negative regulation of apoptotic signaling pathway	13/500	253/28891	0.000509701	0.019279	0.0158723	Bcl2l1/Sgk3/Itgav/Dnaja1/Slc25a4/Ivns1abp/Fbxo7/Herpud1/Mdm4/Higd1a/Mcl1/Gstp1/Ppia	13
Oligodendrocyte	CD_vs_HC	CD up	GO:0045333	cellular respiration	13/500	254/28891	0.000528931	0.0196064	0.0161418	Gpd1/Slc25a13/Mdh1/Cox4i1/Cox5a/Cox8a/Chchd10/Cox6a1/Uqcrq/Cox7a2/Ndufs2/Ndufb2/Ndufa2	13
Oligodendrocyte	CD_vs_HC	CD up	GO:0046394	carboxylic acid biosynthetic process	15/500	321/28891	0.000530246	0.0196064	0.0161418	Ptgds/Errfi1/Pla2g3/Bcat1/Acaca/Glul/Pdk4/Cyp27a1/Ptges3/Sirt2/Mthfd1l/Gstp1/Tecr/Gamt/Elovl5	15
Oligodendrocyte	CD_vs_HC	CD up	GO:0006458	'de novo' protein folding	5/500	39/28891	0.000539184	0.0196064	0.0161418	Hspa8/Hsph1/Ptges3/Hspa9/Dnajb4	5
Oligodendrocyte	CD_vs_HC	CD up	GO:1904356	regulation of telomere maintenance via telomere lengthening	6/500	59/28891	0.0005406	0.0196064	0.0161418	Pot1b/Hnrnpa2b1/Dhx36/Cct3/Cct6a/Cct7	6
Oligodendrocyte	CD_vs_HC	CD up	GO:0042773	ATP synthesis coupled electron transport	7/500	82/28891	0.000553928	0.0196064	0.0161418	Cox4i1/Cox5a/Cox8a/Cox6a1/Uqcrq/Cox7a2/Ndufs2	7
Oligodendrocyte	CD_vs_HC	CD up	GO:0051851	modulation by host of symbiont process	7/500	82/28891	0.000553928	0.0196064	0.0161418	Apoe/Hspa8/Vapa/Zdhhc20/Rab5a/Cdc42/Eif2ak4	7
Oligodendrocyte	CD_vs_HC	CD up	GO:1902903	regulation of supramolecular fiber organization	17/500	393/28891	0.000559072	0.0196064	0.0161418	Sgk1/Apoe/Cryab/Ctnna2/Hspa8/Pak2/Rhpn2/Plekhh2/Dlc1/Tgfb3/Fkbp4/Daam2/Wdr47/Cdc42/Fermt2/Ttc8/Akap9	17
Oligodendrocyte	CD_vs_HC	CD up	GO:1902255	positive regulation of intrinsic apoptotic signaling pathway by p53 class mediator	3/500	10/28891	0.000564752	0.0196064	0.0161418	Ubb/Rpl26/Rpl11	3
Oligodendrocyte	CD_vs_HC	CD up	GO:1904851	positive regulation of establishment of protein localization to telomere	3/500	10/28891	0.000564752	0.0196064	0.0161418	Cct3/Cct6a/Cct7	3
Oligodendrocyte	CD_vs_HC	CD up	GO:0010563	negative regulation of phosphorus metabolic process	18/500	430/28891	0.000571153	0.0196064	0.0161418	Errfi1/Apoe/Dbndd2/Smad7/Dnaja1/Hspa4/Pkig/Chordc1/Rock1/Stk38/Fbxo7/Cnksr3/Sirt2/Ppp5c/Spred1/Gstp1/Dusp3/Ppia	18
Oligodendrocyte	CD_vs_HC	CD up	GO:0045936	negative regulation of phosphate metabolic process	18/500	430/28891	0.000571153	0.0196064	0.0161418	Errfi1/Apoe/Dbndd2/Smad7/Dnaja1/Hspa4/Pkig/Chordc1/Rock1/Stk38/Fbxo7/Cnksr3/Sirt2/Ppp5c/Spred1/Gstp1/Dusp3/Ppia	18
Oligodendrocyte	CD_vs_HC	CD up	GO:0046034	ATP metabolic process	9/500	135/28891	0.000591236	0.0201266	0.0165702	Bcl2l1/Slc25a13/Hspa8/Ak3/Atp1a2/Ndufs2/Ndufb2/Ndufa2/Lipa	9
Oligodendrocyte	CD_vs_HC	CD up	GO:0033673	negative regulation of kinase activity	12/500	225/28891	0.000596771	0.0201472	0.0165871	Errfi1/Apoe/Dbndd2/Dnaja1/Pkig/Chordc1/Stk38/Fbxo7/Spred1/Gstp1/Dusp3/Ppia	12
Oligodendrocyte	CD_vs_HC	CD up	GO:0043434	response to peptide hormone	17/500	396/28891	0.000608602	0.0203782	0.0167772	Sgk1/Ptpn11/Rab31/Stxbp3/Pdk4/Gkap1/Pdk2/Rock1/Scly/Srsf3/Sh2b2/Rab10/Soga1/Ccnd3/Klf15/Chuk/Sesn3	17
Oligodendrocyte	CD_vs_HC	CD up	GO:0072330	monocarboxylic acid biosynthetic process	12/500	227/28891	0.000645196	0.0211478	0.0174109	Ptgds/Errfi1/Pla2g3/Acaca/Pdk4/Cyp27a1/Ptges3/Sirt2/Gstp1/Tecr/Gamt/Elovl5	12
Oligodendrocyte	CD_vs_HC	CD up	GO:0006278	RNA-templated DNA biosynthetic process	6/500	61/28891	0.000647119	0.0211478	0.0174109	Hsp90aa1/Ptges3/Pot1b/Cct3/Cct6a/Cct7	6
Oligodendrocyte	CD_vs_HC	CD up	GO:0007004	telomere maintenance via telomerase	6/500	61/28891	0.000647119	0.0211478	0.0174109	Hsp90aa1/Ptges3/Pot1b/Cct3/Cct6a/Cct7	6
Oligodendrocyte	CD_vs_HC	CD up	GO:0009060	aerobic respiration	11/500	196/28891	0.000655881	0.0212641	0.0175066	Mdh1/Cox4i1/Cox5a/Cox8a/Chchd10/Cox6a1/Uqcrq/Cox7a2/Ndufs2/Ndufb2/Ndufa2	11
Oligodendrocyte	CD_vs_HC	CD up	GO:0032481	positive regulation of type I interferon production	7/500	85/28891	0.000687988	0.0221097	0.0182028	Ptpn11/Hsp90aa1/Gapdh/Traf6/Hspd1/Dhx36/Chuk	7
Oligodendrocyte	CD_vs_HC	CD up	GO:0007266	Rho protein signal transduction	9/500	138/28891	0.000692788	0.0221097	0.0182028	Apoe/Rhou/Phactr4/Kctd13/Dlc1/Rock1/Arhgap5/Cdc42/Chuk	9
Oligodendrocyte	CD_vs_HC	CD up	GO:0021575	hindbrain morphogenesis	6/500	62/28891	0.000706127	0.0221887	0.0182678	Ptpn11/Zfp365/Dlc1/Gli2/Herc1/Kndc1	6
Oligodendrocyte	CD_vs_HC	CD up	GO:0046470	phosphatidylcholine metabolic process	6/500	62/28891	0.000706127	0.0221887	0.0182678	Pla2g3/Pcyt1b/Dbi/Pla2g7/Mboat2/Pnpla7	6
Oligodendrocyte	CD_vs_HC	CD up	GO:0009755	hormone-mediated signaling pathway	10/500	168/28891	0.000726743	0.0226622	0.0186576	Sgk1/Ptpn11/Adipor2/Klf9/Dnaja1/Fkbp4/Crebrf/Ptges3/Ppp5c/Ddrgk1	10
Oligodendrocyte	CD_vs_HC	CD up	GO:0006986	response to unfolded protein	8/500	112/28891	0.000751745	0.0232642	0.0191533	Hsp90aa1/Hsph1/Herpud1/Crebrf/Hspd1/Eif2ak4/Cops5/Ddrgk1	8
Oligodendrocyte	CD_vs_HC	CD up	GO:0070203	regulation of establishment of protein localization to telomere	3/500	11/28891	0.000766574	0.0235448	0.0193843	Cct3/Cct6a/Cct7	3
Oligodendrocyte	CD_vs_HC	CD up	GO:0072521	purine-containing compound metabolic process	19/500	479/28891	0.000775497	0.0236411	0.0194636	Bcl2l1/Acaca/Gpd1/Nt5c3/Slc25a13/Pdk4/Mdh1/Hspa8/Fhit/Pdk2/Hint1/Ak3/Atp1a2/Ndufs2/Ndufb2/Taldo1/Ndufa2/Gamt/Lipa	19
Oligodendrocyte	CD_vs_HC	CD up	GO:0032886	regulation of microtubule-based process	13/500	265/28891	0.000784258	0.0237311	0.0195377	Sgk1/Azin1/Dixdc1/Tacc1/Hsph1/Chordc1/Rock1/Fkbp4/Cyld/Sass6/Bicd1/Wdr47/Akap9	13
Oligodendrocyte	CD_vs_HC	CD up	GO:0048041	focal adhesion assembly	7/500	87/28891	0.000790782	0.0237525	0.0195553	Ptpn11/Itgav/Apod/Dlc1/Rock1/Fermt2/Dusp3	7
Oligodendrocyte	CD_vs_HC	CD up	GO:0051893	regulation of focal adhesion assembly	6/500	64/28891	0.000836559	0.0247634	0.0203875	Ptpn11/Apod/Dlc1/Rock1/Fermt2/Dusp3	6
Oligodendrocyte	CD_vs_HC	CD up	GO:0090109	regulation of cell-substrate junction assembly	6/500	64/28891	0.000836559	0.0247634	0.0203875	Ptpn11/Apod/Dlc1/Rock1/Fermt2/Dusp3	6
Oligodendrocyte	CD_vs_HC	CD up	GO:0046323	glucose import	7/500	88/28891	0.000846535	0.0248533	0.0204616	Ptpn11/Adipor2/Stxbp3/Slc25a27/Ahi1/Sh2b2/Klf15	7
Oligodendrocyte	CD_vs_HC	CD up	GO:0050685	positive regulation of mRNA processing	5/500	43/28891	0.000851764	0.0248533	0.0204616	Hspa8/Ncbp1/Prdx6/Dhx36/Tra2b	5
Oligodendrocyte	CD_vs_HC	CD up	GO:1903311	regulation of mRNA metabolic process	14/500	304/28891	0.000924918	0.0267964	0.0220613	Son/Hspa8/Srrm1/Rbm5/Ncbp1/Rock1/Srsf7/Srsf3/Csde1/Prdx6/Hnrnpa2b1/Dhx36/Supt6/Tra2b	14
Oligodendrocyte	CD_vs_HC	CD up	GO:0009408	response to heat	7/500	90/28891	0.000967323	0.0278024	0.0228896	Hsp90ab1/Cryab/Hsp90aa1/Dnaja1/Chordc1/Dhx36/Psip1	7
Oligodendrocyte	CD_vs_HC	CD up	GO:0006338	chromatin remodeling	19/500	489/28891	0.00098841	0.0278024	0.0228896	Meg3/Setd7/Znfx1/Nap1l5/Kansl1/Morf4l1/Smarcd1/Scmh1/Chd4/Sf3b1/Resf1/Sirt2/Glmn/Supt6/Psip1/Uchl5/Tspyl2/Ezh1/Nsd1	19
Oligodendrocyte	CD_vs_HC	CD up	GO:0022618	protein-RNA complex assembly	10/500	175/28891	0.00099362	0.0278024	0.0228896	Hsp90aa1/Rbm5/Rpl6/Ncbp1/Ago3/Ptges3/Aar2/Sf3b1/Rpl11/Psip1	10
Oligodendrocyte	CD_vs_HC	CD up	GO:0006898	receptor-mediated endocytosis	13/500	272/28891	0.000995398	0.0278024	0.0228896	Apoe/Rab31/Itgav/Ankrd13a/Cd81/Snx1/Ahi1/Bicd1/Sirt2/Usp46/Rab5a/Mtmr2/Dnm2	13
Oligodendrocyte	CD_vs_HC	CD up	GO:0030038	contractile actin filament bundle assembly	8/500	117/28891	0.00100048	0.0278024	0.0228896	Kctd13/Pak2/Rhpn2/Dlc1/Tgfb3/Cdc42/Fermt2/Ttc8	8
Oligodendrocyte	CD_vs_HC	CD up	GO:0043149	stress fiber assembly	8/500	117/28891	0.00100048	0.0278024	0.0228896	Kctd13/Pak2/Rhpn2/Dlc1/Tgfb3/Cdc42/Fermt2/Ttc8	8
Oligodendrocyte	CD_vs_HC	CD up	GO:0070202	regulation of establishment of protein localization to chromosome	3/500	12/28891	0.001009	0.0278498	0.0229285	Cct3/Cct6a/Cct7	3
Oligodendrocyte	CD_vs_HC	CD up	GO:0071900	regulation of protein serine/threonine kinase activity	15/500	343/28891	0.00103907	0.0284871	0.0234533	Hsp90ab1/Apoe/Dnaja1/Pkig/Chordc1/Stk38/Fbxo7/Traf6/Ccny/Sash1/Higd1a/Gstp1/Fermt2/Ccng1/Ccnd3	15
Oligodendrocyte	CD_vs_HC	CD up	GO:0032781	positive regulation of ATP-dependent activity	5/500	45/28891	0.00105091	0.0286197	0.0235625	Ahsa1/Ssbp1/Vmp1/Pot1b/Dnm2	5
Oligodendrocyte	CD_vs_HC	CD up	GO:0010827	regulation of glucose transmembrane transport	7/500	92/28891	0.00110128	0.0297928	0.0245282	Ptpn11/Adipor2/Stxbp3/Slc25a27/Ahi1/Sh2b2/Klf15	7
Oligodendrocyte	CD_vs_HC	CD up	GO:0050857	positive regulation of antigen receptor-mediated signaling pathway	4/500	27/28891	0.00113417	0.0304052	0.0250324	Cd81/Cyld/Usp46/Lipa	4
Oligodendrocyte	CD_vs_HC	CD up	GO:0010821	regulation of mitochondrion organization	9/500	148/28891	0.0011388	0.0304052	0.0250324	Bcl2l1/Slc25a4/Ralbp1/Spire1/Fbxo7/Ssbp1/Chchd10/Higd1a/Usp30	9
Oligodendrocyte	CD_vs_HC	CD up	GO:0030902	hindbrain development	10/500	179/28891	0.00117906	0.0312758	0.0257492	Ptpn11/Dixdc1/Ctnna2/Zfp365/Dlc1/Gli2/Smad1/Herc1/Kndc1/Uqcrq	10
Oligodendrocyte	CD_vs_HC	CD up	GO:0033044	regulation of chromosome organization	12/500	244/28891	0.00120616	0.0315844	0.0260033	Smarcd1/Resf1/Anapc11/Pot1b/Hnrnpa2b1/Dhx36/Uchl5/Cct3/Anapc4/Ppp1r10/Cct6a/Cct7	12
Oligodendrocyte	CD_vs_HC	CD up	GO:1903828	negative regulation of protein localization	12/500	244/28891	0.00120616	0.0315844	0.0260033	Bcl2l1/Ptpn11/Apoe/Ankrd13a/Dnaja1/Abhd17b/Apod/Neo1/Pkig/Ube2j1/Otud7b/Lzts2	12
Oligodendrocyte	CD_vs_HC	CD up	GO:0150116	regulation of cell-substrate junction organization	6/500	69/28891	0.00124409	0.0320587	0.0263937	Ptpn11/Apod/Dlc1/Rock1/Fermt2/Dusp3	6
Oligodendrocyte	CD_vs_HC	CD up	GO:0030512	negative regulation of transforming growth factor beta receptor signaling pathway	7/500	94/28891	0.00124937	0.0320587	0.0263937	Smad7/Htra1/Snx1/Tgfb3/Spred1/Rasl11b/Dnm2	7
Oligodendrocyte	CD_vs_HC	CD up	GO:0015980	energy derivation by oxidation of organic compounds	15/500	350/28891	0.00126946	0.0320587	0.0263937	Gpd1/Slc25a13/Mdh1/Cox4i1/Cox5a/Cox8a/Ptges3/Chchd10/Cox6a1/Uqcrq/Cox7a2/Ndufs2/Ndufb2/Ppp1r2/Ndufa2	15
Oligodendrocyte	CD_vs_HC	CD up	GO:0021696	cerebellar cortex morphogenesis	5/500	47/28891	0.00128264	0.0320587	0.0263937	Ptpn11/Zfp365/Gli2/Herc1/Kndc1	5
Oligodendrocyte	CD_vs_HC	CD up	GO:0031396	regulation of protein ubiquitination	11/500	213/28891	0.00129167	0.0320587	0.0263937	Arrdc3/Ubb/Smad7/Tcf25/Hsp90aa1/Dnaja1/Ivns1abp/Herpud1/Rpl11/Sash1/Ppia	11
Oligodendrocyte	CD_vs_HC	CD up	GO:0032060	bleb assembly	3/500	13/28891	0.0012949	0.0320587	0.0263937	Rock1/Prdx6/Anln	3
Oligodendrocyte	CD_vs_HC	CD up	GO:0034374	low-density lipoprotein particle remodeling	3/500	13/28891	0.0012949	0.0320587	0.0263937	Apoe/Pla2g3/Pla2g7	3
Oligodendrocyte	CD_vs_HC	CD up	GO:1904816	positive regulation of protein localization to chromosome, telomeric region	3/500	13/28891	0.0012949	0.0320587	0.0263937	Cct3/Cct6a/Cct7	3
Oligodendrocyte	CD_vs_HC	CD up	GO:1990253	cellular response to leucine starvation	3/500	13/28891	0.0012949	0.0320587	0.0263937	Sesn1/Eif2ak4/Sesn3	3
Oligodendrocyte	CD_vs_HC	CD up	GO:0036010	protein localization to endosome	4/500	28/28891	0.00130526	0.0321204	0.0264445	Ankrd13a/Abhd17b/Mgat3/Akap11	4
Oligodendrocyte	CD_vs_HC	CD up	GO:0021537	telencephalon development	13/500	281/28891	0.0013349	0.0322231	0.0265291	Dixdc1/Kcna1/Nde1/Tacc1/Dbi/Herc1/Trappc9/Uqcrq/Atp1a2/Wdr47/Ttc8/Uchl5/Tra2b	13
Oligodendrocyte	CD_vs_HC	CD up	GO:0061448	connective tissue development	14/500	316/28891	0.00133551	0.0322231	0.0265291	Arid5b/Ptpn11/Arrdc3/Ubb/Smad7/Sox8/Trps1/Gli2/Smad1/Selenom/Rasal2/Mboat2/Lipa/Ddrgk1	14
Oligodendrocyte	CD_vs_HC	CD up	GO:0030705	cytoskeleton-dependent intracellular transport	11/500	214/28891	0.00134099	0.0322231	0.0265291	Ubb/Nde1/Hspa8/Pcm1/Dync2h1/Bicd1/Dync1i1/Cdc42/Arhgap21/Ap3m1/Fyco1	11
Oligodendrocyte	CD_vs_HC	CD up	GO:0051648	vesicle localization	11/500	214/28891	0.00134099	0.0322231	0.0265291	Bcl2l1/Nde1/Ahi1/Rab3gap1/Trappc9/Dync1i1/Trappc13/Ap3m1/Tmed9/Cops5/Fyco1	11
Oligodendrocyte	CD_vs_HC	CD up	GO:1901652	response to peptide	18/500	464/28891	0.00135276	0.032316	0.0266056	Sgk1/Ptpn11/Rab31/Stxbp3/Nfkbia/Pdk4/Gkap1/Pdk2/Rock1/Scly/Srsf3/Sh2b2/Rab10/Soga1/Ccnd3/Klf15/Chuk/Sesn3	18
Oligodendrocyte	CD_vs_HC	CD up	GO:0043401	steroid hormone mediated signaling pathway	8/500	123/28891	0.00138151	0.0328108	0.0270129	Sgk1/Klf9/Dnaja1/Fkbp4/Crebrf/Ptges3/Ppp5c/Ddrgk1	8
Oligodendrocyte	CD_vs_HC	CD up	GO:0071826	protein-RNA complex organization	10/500	183/28891	0.00139183	0.0328649	0.0270575	Hsp90aa1/Rbm5/Rpl6/Ncbp1/Ago3/Ptges3/Aar2/Sf3b1/Rpl11/Psip1	10
Oligodendrocyte	CD_vs_HC	CD up	GO:0032873	negative regulation of stress-activated MAPK cascade	5/500	48/28891	0.00141169	0.0331422	0.0272858	Dnaja1/Cyld/Gstp1/Dusp3/Ppia	5
Oligodendrocyte	CD_vs_HC	CD up	GO:0016051	carbohydrate biosynthetic process	11/500	216/28891	0.00144426	0.0337132	0.0277559	Gpd1/Slc25a13/Mdh1/Gapdh/Pdk2/Ptges3/Gpt2/Pgam1/Clk2/Zfp692/Soga1	11
Oligodendrocyte	CD_vs_HC	CD up	GO:0070199	establishment of protein localization to chromosome	4/500	29/28891	0.00149359	0.0346665	0.0285407	Pot1b/Cct3/Cct6a/Cct7	4
Oligodendrocyte	CD_vs_HC	CD up	GO:0050856	regulation of T cell receptor signaling pathway	5/500	49/28891	0.00155005	0.0355728	0.0292869	Cd81/Cyld/Usp46/Dusp3/Lipa	5
Oligodendrocyte	CD_vs_HC	CD up	GO:0070303	negative regulation of stress-activated protein kinase signaling cascade	5/500	49/28891	0.00155005	0.0355728	0.0292869	Dnaja1/Cyld/Gstp1/Dusp3/Ppia	5
Oligodendrocyte	CD_vs_HC	CD up	GO:0071383	cellular response to steroid hormone stimulus	10/500	186/28891	0.00157108	0.0358539	0.0295184	Sgk1/Klf9/Ddit4/Dnaja1/Fkbp4/Crebrf/Ptges3/Ppp5c/Atp1a2/Ddrgk1	10
Oligodendrocyte	CD_vs_HC	CD up	GO:0032869	cellular response to insulin stimulus	11/500	219/28891	0.00161133	0.0365681	0.0301064	Sgk1/Ptpn11/Rab31/Pdk4/Gkap1/Pdk2/Srsf3/Sh2b2/Rab10/Soga1/Sesn3	11
Oligodendrocyte	CD_vs_HC	CD up	GO:0061035	regulation of cartilage development	6/500	73/28891	0.0016673	0.0376293	0.03098	Ptpn11/Smad7/Trps1/Gli2/Smad1/Mboat2	6
Oligodendrocyte	CD_vs_HC	CD up	GO:0051492	regulation of stress fiber assembly	7/500	99/28891	0.00168813	0.0378902	0.0311948	Pak2/Rhpn2/Dlc1/Tgfb3/Cdc42/Fermt2/Ttc8	7
Oligodendrocyte	CD_vs_HC	CD up	GO:0099111	microtubule-based transport	11/500	222/28891	0.00179387	0.0400434	0.0329675	Ubb/Nde1/Hspa8/Pcm1/Dync2h1/Bicd1/Dync1i1/Cdc42/Arhgap21/Ap3m1/Fyco1	11
Oligodendrocyte	CD_vs_HC	CD up	GO:0016358	dendrite development	14/500	327/28891	0.00183623	0.0407662	0.0335626	Sgk1/Apoe/Ctnna2/Zfp365/Pak2/Adgrb3/Spire1/Kndc1/Cdc42/Dhx36/Strn/Camk1d/Mink1/Dpysl5	14
Oligodendrocyte	CD_vs_HC	CD up	GO:0006575	cellular modified amino acid metabolic process	8/500	129/28891	0.00186971	0.0411818	0.0339047	Pla2g3/Ckb/Csad/Ctsl/Mthfd1l/Mboat2/Mthfd2/Gamt	8
Oligodendrocyte	CD_vs_HC	CD up	GO:0006754	ATP biosynthetic process	7/500	101/28891	0.00189384	0.0411818	0.0339047	Bcl2l1/Slc25a13/Ak3/Ndufs2/Ndufb2/Ndufa2/Lipa	7
Oligodendrocyte	CD_vs_HC	CD up	GO:0007229	integrin-mediated signaling pathway	7/500	101/28891	0.00189384	0.0411818	0.0339047	Ptpn11/Phactr4/Itgad/Itgav/Lamc1/Cdc42/Fermt2	7
Oligodendrocyte	CD_vs_HC	CD up	GO:0032970	regulation of actin filament-based process	16/500	402/28891	0.00189527	0.0411818	0.0339047	Dixdc1/Ctnna2/Jam3/Pak2/Rhpn2/Plekhh2/Dlc1/Tgfb3/Rock1/Daam2/Bcas3/Atp1a2/Cdc42/Fermt2/Ttc8/Akap9	16
Oligodendrocyte	CD_vs_HC	CD up	GO:1902235	regulation of endoplasmic reticulum stress-induced intrinsic apoptotic signaling pathway	4/500	31/28891	0.00192548	0.0416169	0.034263	Bcl2l1/Spop/Herpud1/Serinc3	4
Oligodendrocyte	CD_vs_HC	CD up	GO:0009205	purine ribonucleoside triphosphate metabolic process	9/500	160/28891	0.00195382	0.0420072	0.0345843	Bcl2l1/Slc25a13/Hspa8/Ak3/Atp1a2/Ndufs2/Ndufb2/Ndufa2/Lipa	9
Oligodendrocyte	CD_vs_HC	CD up	GO:0034329	cell junction assembly	18/500	481/28891	0.00200386	0.0422761	0.0348057	Ptpn11/Smad7/Itgav/Cldn14/Lrrn1/Jam3/Pak2/Adgrb3/Apod/Dlc1/Lamc1/Rock1/Hipk1/Chd4/Vmp1/Cdc42/Fermt2/Dusp3	18
Oligodendrocyte	CD_vs_HC	CD up	GO:1904814	regulation of protein localization to chromosome, telomeric region	3/500	15/28891	0.00200773	0.0422761	0.0348057	Cct3/Cct6a/Cct7	3
Oligodendrocyte	CD_vs_HC	CD up	GO:1905666	regulation of protein localization to endosome	3/500	15/28891	0.00200773	0.0422761	0.0348057	Ankrd13a/Abhd17b/Mgat3	3
Oligodendrocyte	CD_vs_HC	CD up	GO:2000811	negative regulation of anoikis	3/500	15/28891	0.00200773	0.0422761	0.0348057	Bcl2l1/Pdk4/Mcl1	3
Oligodendrocyte	CD_vs_HC	CD up	GO:0006633	fatty acid biosynthetic process	9/500	161/28891	0.00203861	0.042527	0.0350122	Ptgds/Pla2g3/Acaca/Pdk4/Ptges3/Sirt2/Gstp1/Tecr/Elovl5	9
Oligodendrocyte	CD_vs_HC	CD up	GO:0051098	regulation of binding	16/500	405/28891	0.00204171	0.042527	0.0350122	Hsp90ab1/Apoe/Aplp2/Hspa4/Calm1/Ncbp1/Rock1/Hipk1/Cyld/Traf6/Sirt2/Rpl11/Cdc42/Ppp1r2/Nsd1/Ddrgk1	16
Oligodendrocyte	CD_vs_HC	CD up	GO:1901873	regulation of post-translational protein modification	13/500	295/28891	0.00205087	0.042527	0.0350122	Arrdc3/Ubb/Smad7/Tcf25/Hsp90aa1/Dnaja1/Kansl1/Ivns1abp/Herpud1/Sf3b1/Rpl11/Sash1/Ppia	13
Oligodendrocyte	CD_vs_HC	CD up	GO:0051650	establishment of vesicle localization	10/500	193/28891	0.00206274	0.0425571	0.035037	Nde1/Ahi1/Rab3gap1/Trappc9/Dync1i1/Trappc13/Ap3m1/Tmed9/Cops5/Fyco1	10
Oligodendrocyte	CD_vs_HC	CD up	GO:0006163	purine nucleotide metabolic process	17/500	444/28891	0.00208433	0.0427863	0.0352258	Bcl2l1/Acaca/Gpd1/Slc25a13/Pdk4/Mdh1/Hspa8/Fhit/Pdk2/Hint1/Ak3/Atp1a2/Ndufs2/Ndufb2/Taldo1/Ndufa2/Lipa	17
Oligodendrocyte	CD_vs_HC	CD up	GO:0018205	peptidyl-lysine modification	11/500	227/28891	0.00213535	0.0436146	0.0359077	Setd7/Kansl1/Morf4l1/Senp7/Hint1/Sf3b1/Dhps/Sirt2/Kmt5a/Klf15/Ezh1	11
Oligodendrocyte	CD_vs_HC	CD up	GO:0048259	regulation of receptor-mediated endocytosis	8/500	132/28891	0.0021601	0.0436832	0.0359642	Itgav/Ankrd13a/Ahi1/Bicd1/Sirt2/Usp46/Mtmr2/Dnm2	8
Oligodendrocyte	CD_vs_HC	CD up	GO:0007263	nitric oxide mediated signal transduction	4/500	32/28891	0.00217079	0.0436832	0.0359642	Apoe/Mt1/Gapdh/Mt2	4
Oligodendrocyte	CD_vs_HC	CD up	GO:0070198	protein localization to chromosome, telomeric region	4/500	32/28891	0.00217079	0.0436832	0.0359642	Pot1b/Cct3/Cct6a/Cct7	4
Oligodendrocyte	CD_vs_HC	CD up	GO:2000573	positive regulation of DNA biosynthetic process	6/500	77/28891	0.00219177	0.043889	0.0361336	Hsp90aa1/Ptges3/Pot1b/Cct3/Cct6a/Cct7	6
Oligodendrocyte	CD_vs_HC	CD up	GO:0032392	DNA geometric change	5/500	53/28891	0.00220467	0.043932	0.036169	Ssbp1/Pot1b/Ddx1/Hnrnpa2b1/Dhx36	5
Oligodendrocyte	CD_vs_HC	CD up	GO:0061136	regulation of proteasomal protein catabolic process	10/500	195/28891	0.00222392	0.0441006	0.0363077	Hsp90ab1/Apoe/Ubb/Fhit/Herpud1/Sirt2/Rpl11/Glmn/Uchl5/Ddrgk1	10
Oligodendrocyte	CD_vs_HC	CD up	GO:0070972	protein localization to endoplasmic reticulum	6/500	78/28891	0.00234038	0.0461858	0.0380245	Vapa/Herpud1/Sec62/Rab3gap1/Rab10/Ddrgk1	6
Oligodendrocyte	CD_vs_HC	CD up	GO:0051099	positive regulation of binding	10/500	197/28891	0.00239508	0.0468237	0.0385497	Hsp90ab1/Apoe/Hspa4/Calm1/Ncbp1/Hipk1/Traf6/Sirt2/Rpl11/Ddrgk1	10
Oligodendrocyte	CD_vs_HC	CD up	GO:0033120	positive regulation of RNA splicing	5/500	54/28891	0.00239563	0.0468237	0.0385497	Slc38a2/Hspa8/Ncbp1/Prdx6/Tra2b	5
Oligodendrocyte	CD_vs_HC	CD up	GO:0032212	positive regulation of telomere maintenance via telomerase	4/500	33/28891	0.00243683	0.0469733	0.0386729	Pot1b/Cct3/Cct6a/Cct7	4
Oligodendrocyte	CD_vs_HC	CD up	GO:1901798	positive regulation of signal transduction by p53 class mediator	4/500	33/28891	0.00243683	0.0469733	0.0386729	Ubb/Rpl26/Rpl11/Spred1	4
Oligodendrocyte	CD_vs_HC	CD up	GO:0032488	Cdc42 protein signal transduction	3/500	16/28891	0.00243949	0.0469733	0.0386729	Apoe/Rhou/Cdc42	3
Oligodendrocyte	CD_vs_HC	CD up	GO:0043161	proteasome-mediated ubiquitin-dependent protein catabolic process	17/500	451/28891	0.00244928	0.0469733	0.0386729	Kctd13/Ubxn7/Fhit/Trpc4ap/Spop/Psmd4/Fbxo7/Herpud1/Ube2j1/Sirt2/Rpl11/Glmn/Anapc11/Man1a2/Uchl5/Anapc4/Ddrgk1	17
Oligodendrocyte	CD_vs_HC	CD up	GO:0035966	response to topologically incorrect protein	8/500	135/28891	0.0024848	0.0474318	0.0390503	Hsp90aa1/Hsph1/Herpud1/Crebrf/Hspd1/Eif2ak4/Cops5/Ddrgk1	8
Oligodendrocyte	CD_vs_HC	CD up	GO:0010822	positive regulation of mitochondrion organization	6/500	79/28891	0.00249645	0.0474326	0.039051	Slc25a4/Ralbp1/Spire1/Fbxo7/Ssbp1/Chchd10	6
Oligodendrocyte	CD_vs_HC	CD up	GO:0032330	regulation of chondrocyte differentiation	5/500	55/28891	0.00259833	0.0487006	0.0400949	Ptpn11/Smad7/Trps1/Gli2/Mboat2	5
Oligodendrocyte	CD_vs_HC	CD up	GO:1901799	negative regulation of proteasomal protein catabolic process	5/500	55/28891	0.00259833	0.0487006	0.0400949	Hsp90ab1/Fhit/Rpl11/Uchl5/Ddrgk1	5
Oligodendrocyte	CD_vs_HC	CD up	GO:0032411	positive regulation of transporter activity	8/500	136/28891	0.00260112	0.0487006	0.0400949	Kcna1/Stim1/Slc25a4/Calm1/Cnksr3/Vmp1/Akap9/Dnm2	8
Oligodendrocyte	CD_vs_HC	CD up	GO:0009199	ribonucleoside triphosphate metabolic process	9/500	167/28891	0.00261087	0.0487006	0.0400949	Bcl2l1/Slc25a13/Hspa8/Ak3/Atp1a2/Ndufs2/Ndufb2/Ndufa2/Lipa	9
Oligodendrocyte	CD_vs_HC	CD up	GO:0006081	cellular aldehyde metabolic process	6/500	80/28891	0.00266021	0.0493953	0.0406669	Gpd1/Mdh1/Gapdh/Pdxk/Pgam1/Taldo1	6
Oligodendrocyte	CD_vs_HC	CD down	GO:0007272	ensheathment of neurons	18/365	194/28891	6.17242e-11	1.08264e-07	8.86554e-08	Cdh2/Ugt8a/Sox10/Pllp/Mal/Gpm6b/Ptn/Cldn11/Serinc5/Tppp/Dlg1/Tspan2/Fa2h/Bcas1/Plp1/Abca2/S100b/Mag	18
Oligodendrocyte	CD_vs_HC	CD down	GO:0008366	axon ensheathment	18/365	194/28891	6.17242e-11	1.08264e-07	8.86554e-08	Cdh2/Ugt8a/Sox10/Pllp/Mal/Gpm6b/Ptn/Cldn11/Serinc5/Tppp/Dlg1/Tspan2/Fa2h/Bcas1/Plp1/Abca2/S100b/Mag	18
Oligodendrocyte	CD_vs_HC	CD down	GO:0042552	myelination	17/365	191/28891	4.04589e-10	4.731e-07	3.87412e-07	Cdh2/Ugt8a/Sox10/Pllp/Mal/Gpm6b/Ptn/Serinc5/Tppp/Dlg1/Tspan2/Fa2h/Bcas1/Plp1/Abca2/S100b/Mag	17
Oligodendrocyte	CD_vs_HC	CD down	GO:0048709	oligodendrocyte differentiation	13/365	123/28891	5.93627e-09	5.20611e-06	4.26318e-06	Sox10/Mal/Gpm6b/Ptn/Tppp/Enpp2/Tspan2/Fa2h/Nkx2-2/Dusp10/Plp1/Abca2/Mag	13
Oligodendrocyte	CD_vs_HC	CD down	GO:0042063	gliogenesis	22/365	397/28891	9.06918e-09	5.71847e-06	4.68274e-06	Cdh2/Sox10/Mal/Gpm6b/Ptn/Tppp/Bin1/App/Enpp2/Tspan2/Gjc2/Fa2h/Nkx2-2/Cers2/Dusp10/Zeb2/Plp1/Abca2/Mag/Rnf112/Epm2a/Matn2	22
Oligodendrocyte	CD_vs_HC	CD down	GO:0014003	oligodendrocyte development	9/365	49/28891	9.78074e-09	5.71847e-06	4.68274e-06	Sox10/Mal/Gpm6b/Tppp/Fa2h/Nkx2-2/Plp1/Abca2/Mag	9
Oligodendrocyte	CD_vs_HC	CD down	GO:0034329	cell junction assembly	24/365	481/28891	1.44809e-08	7.25699e-06	5.94261e-06	Cdh2/Ugt8a/Srcin1/Gpm6b/Cldn11/Erbb4/Rap1a/Cdh20/App/Enpp2/Dlg1/Pik3r1/Kirrel3/Efnb3/Myo6/Grid2/Lrrc4b/Lrrc4/Mapt/Nectin1/Tbcd/Crk/Ldb1/Clstn1	24
Oligodendrocyte	CD_vs_HC	CD down	GO:0010001	glial cell differentiation	18/365	292/28891	4.17864e-08	1.83234e-05	1.50046e-05	Cdh2/Sox10/Mal/Gpm6b/Ptn/Tppp/Bin1/App/Enpp2/Tspan2/Fa2h/Nkx2-2/Dusp10/Zeb2/Plp1/Abca2/Mag/Rnf112	18
Oligodendrocyte	CD_vs_HC	CD down	GO:0022010	central nervous system myelination	7/365	30/28891	7.6892e-08	2.69737e-05	2.20882e-05	Sox10/Mal/Gpm6b/Fa2h/Plp1/Abca2/Mag	7
Oligodendrocyte	CD_vs_HC	CD down	GO:0032291	axon ensheathment in central nervous system	7/365	30/28891	7.6892e-08	2.69737e-05	2.20882e-05	Sox10/Mal/Gpm6b/Fa2h/Plp1/Abca2/Mag	7
Oligodendrocyte	CD_vs_HC	CD down	GO:1902903	regulation of supramolecular fiber organization	20/365	393/28891	1.72305e-07	5.09292e-05	4.17049e-05	Prox1/Slain1/Mtss1/Lpar1/Prkcq/Bin1/App/Dlg1/Pik3r1/Apc/Shroom2/Mapt/Map6d1/Sorbs3/Tmeff2/Cdk5rap2/Tbcd/Add3/Tmod1/Arfgef1	20
Oligodendrocyte	CD_vs_HC	CD down	GO:0007416	synapse assembly	15/365	222/28891	1.74216e-07	5.09292e-05	4.17049e-05	Cdh2/Srcin1/Erbb4/App/Pik3r1/Kirrel3/Efnb3/Myo6/Grid2/Lrrc4b/Lrrc4/Mapt/Nectin1/Crk/Clstn1	15
Oligodendrocyte	CD_vs_HC	CD down	GO:0021782	glial cell development	12/365	139/28891	2.18485e-07	5.89574e-05	4.8279e-05	Sox10/Mal/Gpm6b/Tppp/App/Tspan2/Fa2h/Nkx2-2/Zeb2/Plp1/Abca2/Mag	12
Oligodendrocyte	CD_vs_HC	CD down	GO:0098742	cell-cell adhesion via plasma-membrane adhesion molecules	14/365	211/28891	5.59006e-07	0.000140071	0.000114701	Cdh2/Dscaml1/Cadm2/Igsf11/Cdh20/Kirrel3/Cadm4/Grid2/Lrrc4b/Lrrc4/Mcam/Nectin1/Mag/Clstn1	14
Oligodendrocyte	CD_vs_HC	CD down	GO:0007015	actin filament organization	21/365	471/28891	7.43215e-07	0.000173813	0.000142332	Prox1/Shtn1/Mtss1/Lpar1/Prkcq/Pls1/Bin1/Dlg1/Pik3r1/Sh3kbp1/Myo6/Shroom2/Gas7/Zeb2/Fat1/Sorbs3/Tmeff2/Pakap/Add3/Tmod1/Arfgef1	21
Oligodendrocyte	CD_vs_HC	CD down	GO:0002088	lens development in camera-type eye	9/365	91/28891	2.34142e-06	0.000513357	0.000420378	Prox1/Sox2/Dlg1/Shroom2/Zeb2/Fgfr2/Fat1/Nectin1/Tmod1	9
Oligodendrocyte	CD_vs_HC	CD down	GO:0045664	regulation of neuron differentiation	14/365	245/28891	3.27628e-06	0.00067607	0.00055362	Gprc5b/Prox1/Sox2/Bin1/App/Zfhx2/Nkx2-2/Dleu2/S100b/Alk/Mag/Cdk5rap2/Rnf112/Zfp536	14
Oligodendrocyte	CD_vs_HC	CD down	GO:1902905	positive regulation of supramolecular fiber organization	12/365	183/28891	4.06806e-06	0.000763622	0.000625315	Prox1/Slain1/Mtss1/Lpar1/Prkcq/Bin1/App/Dlg1/Apc/Mapt/Sorbs3/Cdk5rap2	12
Oligodendrocyte	CD_vs_HC	CD down	GO:0060828	regulation of canonical Wnt signaling pathway	14/365	251/28891	4.33468e-06	0.000763622	0.000625315	Cdh2/Sox10/Gprc5b/Sox2/App/Apc/Tmem88b/Rnf220/Rps12/Zeb2/Fgfr2/Axin1/Wls/Siah2	14
Oligodendrocyte	CD_vs_HC	CD down	GO:0032970	regulation of actin filament-based process	18/365	402/28891	4.3536e-06	0.000763622	0.000625315	Prox1/Mtss1/Lpar1/Gpm6b/Prkcq/Bin1/Dlg1/Pik3r1/Shroom2/Zeb2/Sorbs3/Tmeff2/Pde4b/Add3/Crk/Tmod1/Arfgef1/Ank2	18
Oligodendrocyte	CD_vs_HC	CD down	GO:0016358	dendrite development	16/365	327/28891	4.89288e-06	0.000817344	0.000669307	Srcin1/Klf7/Dip2a/Lpar1/Ptn/Gpr37/App/Ppp3ca/Myo6/Dock10/Alk/Btbd3/Crk/Wls/Hecw2/Matn2	16
Oligodendrocyte	CD_vs_HC	CD down	GO:0050767	regulation of neurogenesis	20/365	494/28891	5.82478e-06	0.000928787	0.000760565	Sox10/Prox1/Shtn1/Ptn/Sox2/Bin1/Enpp2/Sema6a/Gjc2/Ppp3ca/Efnb3/Nkx2-2/Cers2/Appl2/Dusp10/Zeb2/Mapt/Mag/Rnf112/Wls	20
Oligodendrocyte	CD_vs_HC	CD down	GO:0051495	positive regulation of cytoskeleton organization	12/365	195/28891	7.79445e-06	0.00118882	0.000973504	Prox1/Slain1/Mtss1/Lpar1/Prkcq/Bin1/Dlg1/Apc/Mapt/Sorbs3/Cdk5rap2/Add3	12
Oligodendrocyte	CD_vs_HC	CD down	GO:0046578	regulation of Ras protein signal transduction	12/365	199/28891	9.57504e-06	0.00139955	0.00114606	Cdh2/Auts2/Ralgps1/Lpar1/Arhgef28/Cadm4/Cdc42se2/Heg1/Prag1/Crk/Arfgef1/Myo9b	12
Oligodendrocyte	CD_vs_HC	CD down	GO:0007156	homophilic cell adhesion via plasma membrane adhesion molecules	9/365	109/28891	1.04369e-05	0.00146451	0.00119926	Cdh2/Dscaml1/Cadm2/Igsf11/Cdh20/Kirrel3/Cadm4/Nectin1/Clstn1	9
Oligodendrocyte	CD_vs_HC	CD down	GO:0051962	positive regulation of nervous system development	17/365	391/28891	1.17537e-05	0.00158584	0.00129862	Sox10/Shtn1/Ptn/Sox2/Bin1/Enpp2/Pik3r1/Gjc2/Nkx2-2/Grid2/Lrrc4b/Zeb2/Mapt/Mag/Rnf112/Wls/Clstn1	17
Oligodendrocyte	CD_vs_HC	CD down	GO:0008360	regulation of cell shape	10/365	142/28891	1.39012e-05	0.00178799	0.00146415	Lpar1/Ptn/Dlg1/Sh3kbp1/Cdc42se2/Gas7/Prag1/S100b/Pakap/Crk	10
Oligodendrocyte	CD_vs_HC	CD down	GO:0031641	regulation of myelination	7/365	63/28891	1.46126e-05	0.00178799	0.00146415	Cdh2/Sox10/Ptn/Tppp/Dlg1/S100b/Mag	7
Oligodendrocyte	CD_vs_HC	CD down	GO:0014013	regulation of gliogenesis	10/365	143/28891	1.4781e-05	0.00178799	0.00146415	Sox10/Ptn/Bin1/Enpp2/Gjc2/Nkx2-2/Cers2/Dusp10/Mag/Rnf112	10
Oligodendrocyte	CD_vs_HC	CD down	GO:0030111	regulation of Wnt signaling pathway	15/365	323/28891	1.78664e-05	0.00208918	0.00171078	Cdh2/Sox10/Gprc5b/Sox2/App/Apc/Tmem88b/Rnf220/Rps12/Zeb2/Rnf43/Fgfr2/Axin1/Wls/Siah2	15
Oligodendrocyte	CD_vs_HC	CD down	GO:0014015	positive regulation of gliogenesis	8/365	93/28891	2.4055e-05	0.0027221	0.00222907	Sox10/Ptn/Bin1/Enpp2/Gjc2/Nkx2-2/Mag/Rnf112	8
Oligodendrocyte	CD_vs_HC	CD down	GO:0016055	Wnt signaling pathway	18/365	460/28891	2.66965e-05	0.00292661	0.00239654	Cdh2/Sox10/Gprc5b/Sox2/App/Apc/Tmem88b/Rnf220/Rps12/Zeb2/Rnf43/Fgfr2/Axin1/Epm2a/Lrrfip2/Wls/Siah2/Ldb1	18
Oligodendrocyte	CD_vs_HC	CD down	GO:0198738	cell-cell signaling by wnt	18/365	462/28891	2.82558e-05	0.00300368	0.00245965	Cdh2/Sox10/Gprc5b/Sox2/App/Apc/Tmem88b/Rnf220/Rps12/Zeb2/Rnf43/Fgfr2/Axin1/Epm2a/Lrrfip2/Wls/Siah2/Ldb1	18
Oligodendrocyte	CD_vs_HC	CD down	GO:0007265	Ras protein signal transduction	15/365	342/28891	3.45851e-05	0.00356837	0.00292207	Cdh2/Auts2/Shtn1/Ralgps1/Lpar1/Rap1a/Arhgef28/Cadm4/Cdc42se2/Heg1/Prag1/Usp50/Crk/Arfgef1/Myo9b	15
Oligodendrocyte	CD_vs_HC	CD down	GO:0070507	regulation of microtubule cytoskeleton organization	10/365	159/28891	3.69331e-05	0.00360504	0.0029521	Phldb1/Slain1/Stmn4/Tppp/Trim36/Apc/Mapt/Map6d1/Cdk5rap2/Tbcd	10
Oligodendrocyte	CD_vs_HC	CD down	GO:0007264	small GTPase mediated signal transduction	17/365	428/28891	3.69959e-05	0.00360504	0.0029521	Cdh2/Auts2/Shtn1/Ralgps1/Lpar1/Rap1a/Arhgef28/Cadm4/Cdc42se2/Heg1/Prag1/Usp50/Dock10/Crk/Nucb2/Arfgef1/Myo9b	17
Oligodendrocyte	CD_vs_HC	CD down	GO:0060070	canonical Wnt signaling pathway	14/365	305/28891	3.84672e-05	0.00364711	0.00298654	Cdh2/Sox10/Gprc5b/Sox2/App/Apc/Tmem88b/Rnf220/Rps12/Zeb2/Fgfr2/Axin1/Wls/Siah2	14
Oligodendrocyte	CD_vs_HC	CD down	GO:0051056	regulation of small GTPase mediated signal transduction	12/365	230/28891	4.02248e-05	0.00371338	0.00304081	Cdh2/Auts2/Ralgps1/Lpar1/Arhgef28/Cadm4/Cdc42se2/Heg1/Prag1/Crk/Arfgef1/Myo9b	12
Oligodendrocyte	CD_vs_HC	CD down	GO:0030048	actin filament-based movement	9/365	130/28891	4.27449e-05	0.00384485	0.00314847	Shtn1/Bin1/Dlg1/Wipf1/Myo6/Zeb2/Pde4b/Ank2/Myo9b	9
Oligodendrocyte	CD_vs_HC	CD down	GO:0099003	vesicle-mediated transport in synapse	13/365	270/28891	4.44987e-05	0.00390254	0.00319571	Cdh2/Dnajc6/Lpar1/Rap1a/Bin1/Syt11/Synj2/Myo6/Scamp5/Napa/Erc1/Snapin/Clstn1	13
Oligodendrocyte	CD_vs_HC	CD down	GO:0032956	regulation of actin cytoskeleton organization	15/365	351/28891	4.64856e-05	0.00397735	0.00325697	Prox1/Mtss1/Lpar1/Gpm6b/Prkcq/Bin1/Dlg1/Pik3r1/Shroom2/Sorbs3/Tmeff2/Add3/Crk/Tmod1/Arfgef1	15
Oligodendrocyte	CD_vs_HC	CD down	GO:0031109	microtubule polymerization or depolymerization	9/365	134/28891	5.41924e-05	0.00452635	0.00370654	Slain1/Stmn4/Tppp/Apc/Mapt/Map6d1/Cdk5rap2/Tbcd/Nckap5	9
Oligodendrocyte	CD_vs_HC	CD down	GO:0032271	regulation of protein polymerization	11/365	206/28891	6.81299e-05	0.00552419	0.00452365	Slain1/Tppp/Bin1/Dlg1/Apc/Mapt/Cdk5rap2/Tbcd/Add3/Tmod1/Arfgef1	11
Oligodendrocyte	CD_vs_HC	CD down	GO:0051258	protein polymerization	13/365	282/28891	6.92886e-05	0.00552419	0.00452365	Slain1/Mtss1/Tppp/Bin1/Dlg1/Apc/Gas7/Mapt/Cdk5rap2/Tbcd/Add3/Tmod1/Arfgef1	13
Oligodendrocyte	CD_vs_HC	CD down	GO:1901888	regulation of cell junction assembly	12/365	246/28891	7.68056e-05	0.00598742	0.00490298	Srcin1/Gpm6b/Rap1a/App/Enpp2/Pik3r1/Efnb3/Grid2/Lrrc4b/Nectin1/Ldb1/Clstn1	12
Oligodendrocyte	CD_vs_HC	CD down	GO:0050768	negative regulation of neurogenesis	10/365	175/28891	8.28638e-05	0.00631926	0.00517472	Sox10/Prox1/Ptn/Sema6a/Ppp3ca/Efnb3/Cers2/Appl2/Dusp10/Mag	10
Oligodendrocyte	CD_vs_HC	CD down	GO:0051494	negative regulation of cytoskeleton organization	10/365	176/28891	8.68864e-05	0.00648505	0.00531048	Pik3r1/Apc/Shroom2/Map6d1/Tmeff2/Cdk5rap2/Tbcd/Add3/Tmod1/Arfgef1	10
Oligodendrocyte	CD_vs_HC	CD down	GO:0045687	positive regulation of glial cell differentiation	6/365	58/28891	9.07908e-05	0.00652011	0.00533919	Ptn/Bin1/Enpp2/Nkx2-2/Mag/Rnf112	6
Oligodendrocyte	CD_vs_HC	CD down	GO:0061572	actin filament bundle organization	10/365	177/28891	9.10733e-05	0.00652011	0.00533919	Shtn1/Mtss1/Lpar1/Prkcq/Pls1/Pik3r1/Gas7/Zeb2/Sorbs3/Tmeff2	10
Oligodendrocyte	CD_vs_HC	CD down	GO:0035023	regulation of Rho protein signal transduction	7/365	85/28891	0.000102814	0.00721341	0.00590692	Cdh2/Lpar1/Arhgef28/Cdc42se2/Heg1/Prag1/Myo9b	7
Oligodendrocyte	CD_vs_HC	CD down	GO:0051961	negative regulation of nervous system development	10/365	183/28891	0.000119958	0.00825122	0.00675676	Sox10/Prox1/Ptn/Sema6a/Ppp3ca/Efnb3/Cers2/Appl2/Dusp10/Mag	10
Oligodendrocyte	CD_vs_HC	CD down	GO:0031110	regulation of microtubule polymerization or depolymerization	7/365	92/28891	0.000169238	0.0114171	0.00934921	Slain1/Stmn4/Apc/Mapt/Map6d1/Cdk5rap2/Tbcd	7
Oligodendrocyte	CD_vs_HC	CD down	GO:0099504	synaptic vesicle cycle	11/365	230/28891	0.000180329	0.0117619	0.00963158	Cdh2/Dnajc6/Lpar1/Rap1a/Bin1/Syt11/Synj2/Scamp5/Napa/Erc1/Snapin	11
Oligodendrocyte	CD_vs_HC	CD down	GO:0032273	positive regulation of protein polymerization	7/365	93/28891	0.000181055	0.0117619	0.00963158	Slain1/Tppp/Bin1/Dlg1/Apc/Mapt/Cdk5rap2	7
Oligodendrocyte	CD_vs_HC	CD down	GO:0048708	astrocyte differentiation	7/365	94/28891	0.000193531	0.0123437	0.010108	Bin1/App/Tspan2/Nkx2-2/Zeb2/Plp1/Mag	7
Oligodendrocyte	CD_vs_HC	CD down	GO:0051261	protein depolymerization	8/365	128/28891	0.000230519	0.0143132	0.0117208	Dnajc6/Stmn4/Apc/Shroom2/Map6d1/Add3/Nckap5/Tmod1	8
Oligodendrocyte	CD_vs_HC	CD down	GO:0022604	regulation of cell morphogenesis	12/365	277/28891	0.000232569	0.0143132	0.0117208	Lpar1/Ptn/Enpp2/Dlg1/Sh3kbp1/Cdc42se2/Gas7/Prag1/S100b/Pakap/Crk/Wls	12
Oligodendrocyte	CD_vs_HC	CD down	GO:0045685	regulation of glial cell differentiation	7/365	98/28891	0.00025056	0.0150237	0.0123026	Ptn/Bin1/Enpp2/Nkx2-2/Dusp10/Mag/Rnf112	7
Oligodendrocyte	CD_vs_HC	CD down	GO:0110053	regulation of actin filament organization	12/365	280/28891	0.000256598	0.0150237	0.0123026	Mtss1/Lpar1/Prkcq/Bin1/Dlg1/Pik3r1/Shroom2/Sorbs3/Tmeff2/Add3/Tmod1/Arfgef1	12
Oligodendrocyte	CD_vs_HC	CD down	GO:0097150	neuronal stem cell population maintenance	4/365	25/28891	0.000256961	0.0150237	0.0123026	Cdh2/Prox1/Sox2/Fancc	4
Oligodendrocyte	CD_vs_HC	CD down	GO:0010721	negative regulation of cell development	13/365	323/28891	0.000264538	0.0152131	0.0124577	Sox10/Prox1/Ptn/Zfp608/Sema6a/Pik3r1/Ppp3ca/Efnb3/Cers2/Appl2/Dusp10/Dleu2/Mag	13
Oligodendrocyte	CD_vs_HC	CD down	GO:0031644	regulation of nervous system process	9/365	167/28891	0.000288908	0.0162787	0.0133303	Sox10/Tppp/Igsf11/App/Zfhx2/Grik2/Grm3/S100b/Mag	9
Oligodendrocyte	CD_vs_HC	CD down	GO:0031643	positive regulation of myelination	4/365	26/28891	0.000300671	0.0162787	0.0133303	Sox10/Tppp/S100b/Mag	4
Oligodendrocyte	CD_vs_HC	CD down	GO:0032288	myelin assembly	4/365	26/28891	0.000300671	0.0162787	0.0133303	Ugt8a/Tppp/Abca2/Mag	4
Oligodendrocyte	CD_vs_HC	CD down	GO:0070252	actin-mediated cell contraction	7/365	101/28891	0.00030163	0.0162787	0.0133303	Shtn1/Bin1/Dlg1/Zeb2/Pde4b/Ank2/Myo9b	7
Oligodendrocyte	CD_vs_HC	CD down	GO:0001764	neuron migration	10/365	206/28891	0.000312549	0.01628	0.0133313	Auts2/Shtn1/Tyro3/Sema6a/Kirrel3/Unc5c/Mapt/Zfp609/Crk/Matn2	10
Oligodendrocyte	CD_vs_HC	CD down	GO:0030178	negative regulation of Wnt signaling pathway	9/365	169/28891	0.00031543	0.01628	0.0133313	Cdh2/Sox10/Sox2/App/Apc/Tmem88b/Rnf43/Axin1/Siah2	9
Oligodendrocyte	CD_vs_HC	CD down	GO:0050769	positive regulation of neurogenesis	13/365	329/28891	0.000315575	0.01628	0.0133313	Sox10/Shtn1/Ptn/Sox2/Bin1/Enpp2/Gjc2/Nkx2-2/Zeb2/Mapt/Mag/Rnf112/Wls	13
Oligodendrocyte	CD_vs_HC	CD down	GO:0070050	neuron cellular homeostasis	6/365	73/28891	0.000325822	0.0165199	0.0135278	Car2/Tyro3/App/Erc1/Slc24a2/Snapin	6
Oligodendrocyte	CD_vs_HC	CD down	GO:0090090	negative regulation of canonical Wnt signaling pathway	8/365	135/28891	0.000330944	0.0165199	0.0135278	Cdh2/Sox10/Sox2/App/Apc/Tmem88b/Axin1/Siah2	8
Oligodendrocyte	CD_vs_HC	CD down	GO:0007611	learning or memory	13/365	331/28891	0.000334354	0.0165199	0.0135278	Ptn/Syt11/App/Specc1/Gatm/Mapt/Ncam1/Sorcs3/S100b/Slc24a2/Epm2a/Taco1/B3gat1	13
Oligodendrocyte	CD_vs_HC	CD down	GO:0010761	fibroblast migration	6/365	74/28891	0.000350848	0.0170941	0.013998	Schip1/Apc/Appl2/Zeb2/Slc8a1/Prr5l	6
Oligodendrocyte	CD_vs_HC	CD down	GO:1903115	regulation of actin filament-based movement	5/365	49/28891	0.000378345	0.0179468	0.0146963	Bin1/Dlg1/Zeb2/Pde4b/Ank2	5
Oligodendrocyte	CD_vs_HC	CD down	GO:0033674	positive regulation of kinase activity	15/365	426/28891	0.00038352	0.0179468	0.0146963	Gprc5b/Prox1/Srcin1/Rassf2/Erbb4/Ddr1/Rap1a/Tyro3/App/Dlg1/Gab1/Zeb2/Fgfr2/Axin1/Alk	15
Oligodendrocyte	CD_vs_HC	CD down	GO:0007266	Rho protein signal transduction	8/365	138/28891	0.000383698	0.0179468	0.0146963	Cdh2/Shtn1/Lpar1/Arhgef28/Cdc42se2/Heg1/Prag1/Myo9b	8
Oligodendrocyte	CD_vs_HC	CD down	GO:0051017	actin filament bundle assembly	9/365	174/28891	0.00039065	0.0180316	0.0147657	Mtss1/Lpar1/Prkcq/Pls1/Pik3r1/Gas7/Zeb2/Sorbs3/Tmeff2	9
Oligodendrocyte	CD_vs_HC	CD down	GO:0002089	lens morphogenesis in camera-type eye	4/365	28/28891	0.00040367	0.0183906	0.0150597	Prox1/Sox2/Shroom2/Nectin1	4
Oligodendrocyte	CD_vs_HC	CD down	GO:1902904	negative regulation of supramolecular fiber organization	9/365	178/28891	0.000460957	0.0205871	0.0168584	Pik3r1/Apc/Shroom2/Map6d1/Tmeff2/Tbcd/Add3/Tmod1/Arfgef1	9
Oligodendrocyte	CD_vs_HC	CD down	GO:1901985	positive regulation of protein acetylation	4/365	29/28891	0.000463621	0.0205871	0.0168584	Auts2/Dip2a/App/Xbp1	4
Oligodendrocyte	CD_vs_HC	CD down	GO:0043254	regulation of protein-containing complex assembly	15/365	437/28891	0.000499666	0.0216527	0.0177309	Slain1/Tppp/Bin1/Syt11/Dlg1/Apc/Napa/Mapt/Usp50/Ncam1/Cdk5rap2/Tbcd/Add3/Tmod1/Arfgef1	15
Oligodendrocyte	CD_vs_HC	CD down	GO:0010762	regulation of fibroblast migration	5/365	52/28891	0.000499962	0.0216527	0.0177309	Apc/Appl2/Zeb2/Slc8a1/Prr5l	5
Oligodendrocyte	CD_vs_HC	CD down	GO:0051963	regulation of synapse assembly	8/365	144/28891	0.000509758	0.0218077	0.0178579	Srcin1/App/Pik3r1/Efnb3/Grid2/Lrrc4b/Nectin1/Clstn1	8
Oligodendrocyte	CD_vs_HC	CD down	GO:0021543	pallium development	9/365	182/28891	0.000541345	0.0226775	0.0185702	Cdh2/Prox1/Sox2/Kirrel3/Zeb2/Alk/Btbd3/Crk/Ogdh	9
Oligodendrocyte	CD_vs_HC	CD down	GO:0031345	negative regulation of cell projection organization	10/365	221/28891	0.000543019	0.0226775	0.0185702	Lpar1/App/Sema6a/Ppp3ca/Efnb3/Cers2/Dleu2/Prag1/Mag/Snapin	10
Oligodendrocyte	CD_vs_HC	CD down	GO:0034765	regulation of monoatomic ion transmembrane transport	16/365	490/28891	0.000563516	0.0232567	0.0190444	Kcnk13/Bin1/App/Dlg1/Gjc2/Ppp3ca/Clic4/Plp1/Kcna6/Slc8a1/Ubr3/Akap7/Pde4b/Hecw2/Taco1/Ank2	16
Oligodendrocyte	CD_vs_HC	CD down	GO:0042391	regulation of membrane potential	16/365	491/28891	0.000575945	0.0234932	0.0192381	Kcnk13/Shtn1/Ptn/Igsf11/Bin1/App/Dlg1/Insyn2a/Ppp3ca/Grik2/Grid2/Mapt/Slc8a1/Akap7/Rnf122/Ank2	16
Oligodendrocyte	CD_vs_HC	CD down	GO:0031214	biomineral tissue development	9/365	184/28891	0.000585651	0.0236145	0.0193375	Ank/Mtss1/Gpm6b/Ptn/Slc8a1/Fgfr2/Fbn2/Nectin1/Wls	9
Oligodendrocyte	CD_vs_HC	CD down	GO:0031116	positive regulation of microtubule polymerization	4/365	31/28891	0.000602105	0.0240021	0.0196548	Slain1/Apc/Mapt/Cdk5rap2	4
Oligodendrocyte	CD_vs_HC	CD down	GO:0061351	neural precursor cell proliferation	10/365	225/28891	0.000623962	0.0245939	0.0201395	Cdh2/Sox10/Prox1/Ptn/Sox2/Gjc2/Hhip/Appl2/Zeb2/Fgfr2	10
Oligodendrocyte	CD_vs_HC	CD down	GO:0031113	regulation of microtubule polymerization	5/365	55/28891	0.000648855	0.0252909	0.0207103	Slain1/Apc/Mapt/Cdk5rap2/Tbcd	5
Oligodendrocyte	CD_vs_HC	CD down	GO:0099084	postsynaptic specialization organization	5/365	56/28891	0.000705176	0.0271418	0.0222259	Cdh2/Grid2/Lrrc4b/Lrrc4/Crk	5
Oligodendrocyte	CD_vs_HC	CD down	GO:0048638	regulation of developmental growth	14/365	405/28891	0.000711814	0.0271418	0.0222259	Prox1/Shtn1/Erbb4/Pls1/App/Dlg1/Sema6a/Apc/Dusp10/Mapt/Ncam1/Fgfr2/Mag/Yy1	14
Oligodendrocyte	CD_vs_HC	CD down	GO:0099565	chemical synaptic transmission, postsynaptic	7/365	117/28891	0.000732614	0.0275815	0.022586	Igsf11/App/Anks1b/Insyn2a/Ppp3ca/Grik2/Grid2	7
Oligodendrocyte	CD_vs_HC	CD down	GO:0045216	cell-cell junction organization	10/365	231/28891	0.000763875	0.0275815	0.022586	Cdh2/Ugt8a/Mtss1/Cldn11/Cdh20/Dlg1/Shroom2/Heg1/Nectin1/Tbcd	10
Oligodendrocyte	CD_vs_HC	CD down	GO:0007626	locomotory behavior	11/365	273/28891	0.000765616	0.0275815	0.022586	Gprc5b/Npas3/Gpr37/App/Efnb3/Myo6/Abca2/Mapt/Axin1/Alk/Tmod1	11
Oligodendrocyte	CD_vs_HC	CD down	GO:0072574	hepatocyte proliferation	4/365	33/28891	0.000767627	0.0275815	0.022586	Prox1/Ptn/Tgfa/Xbp1	4
Oligodendrocyte	CD_vs_HC	CD down	GO:0072575	epithelial cell proliferation involved in liver morphogenesis	4/365	33/28891	0.000767627	0.0275815	0.022586	Prox1/Ptn/Tgfa/Xbp1	4
Oligodendrocyte	CD_vs_HC	CD down	GO:0045666	positive regulation of neuron differentiation	7/365	118/28891	0.000770521	0.0275815	0.022586	Gprc5b/Prox1/Sox2/App/Nkx2-2/S100b/Rnf112	7
Oligodendrocyte	CD_vs_HC	CD down	GO:0007612	learning	9/365	192/28891	0.00079359	0.0278391	0.0227969	Ptn/Syt11/App/Specc1/Sorcs3/Slc24a2/Epm2a/Taco1/B3gat1	9
Oligodendrocyte	CD_vs_HC	CD down	GO:0048813	dendrite morphogenesis	9/365	192/28891	0.00079359	0.0278391	0.0227969	Srcin1/Klf7/Dip2a/Ptn/Ppp3ca/Dock10/Btbd3/Wls/Hecw2	9
Oligodendrocyte	CD_vs_HC	CD down	GO:0070307	lens fiber cell development	3/365	15/28891	0.000812875	0.0282333	0.0231197	Prox1/Fgfr2/Tmod1	3
Oligodendrocyte	CD_vs_HC	CD down	GO:0021761	limbic system development	7/365	120/28891	0.000850981	0.0292671	0.0239662	Prox1/Kirrel3/Zeb2/Fgfr2/Alk/Crk/Ogdh	7
Oligodendrocyte	CD_vs_HC	CD down	GO:1904062	regulation of monoatomic cation transmembrane transport	13/365	367/28891	0.000875144	0.0298059	0.0244074	Bin1/App/Dlg1/Gjc2/Ppp3ca/Plp1/Slc8a1/Ubr3/Akap7/Pde4b/Hecw2/Taco1/Ank2	13
Oligodendrocyte	CD_vs_HC	CD down	GO:0046785	microtubule polymerization	6/365	88/28891	0.000885565	0.0298708	0.0244606	Slain1/Tppp/Apc/Mapt/Cdk5rap2/Tbcd	6
Oligodendrocyte	CD_vs_HC	CD down	GO:0021766	hippocampus development	6/365	89/28891	0.000939644	0.0313931	0.0257072	Prox1/Kirrel3/Zeb2/Alk/Crk/Ogdh	6
Oligodendrocyte	CD_vs_HC	CD down	GO:0031112	positive regulation of microtubule polymerization or depolymerization	4/365	35/28891	0.000962923	0.0316609	0.0259265	Slain1/Apc/Mapt/Cdk5rap2	4
Oligodendrocyte	CD_vs_HC	CD down	GO:0050890	cognition	13/365	371/28891	0.000965713	0.0316609	0.0259265	Ptn/Syt11/App/Specc1/Gatm/Mapt/Ncam1/Sorcs3/S100b/Slc24a2/Epm2a/Taco1/B3gat1	13
Oligodendrocyte	CD_vs_HC	CD down	GO:0045665	negative regulation of neuron differentiation	6/365	91/28891	0.00105539	0.0341287	0.0279473	Sox2/App/Nkx2-2/Mag/Cdk5rap2/Zfp536	6
Oligodendrocyte	CD_vs_HC	CD down	GO:0072576	liver morphogenesis	4/365	36/28891	0.00107259	0.0341287	0.0279473	Prox1/Ptn/Tgfa/Xbp1	4
Oligodendrocyte	CD_vs_HC	CD down	GO:0060419	heart growth	7/365	125/28891	0.0010813	0.0341287	0.0279473	Prox1/Erbb4/Apc/Heg1/Ncam1/Fgfr2/Yy1	7
Oligodendrocyte	CD_vs_HC	CD down	GO:0002064	epithelial cell development	10/365	242/28891	0.00108729	0.0341287	0.0279473	Cdh2/Prox1/Rap1a/Nkx2-2/Clic4/Heg1/Fgfr2/Fat1/Xbp1/Tmod1	10
Oligodendrocyte	CD_vs_HC	CD down	GO:0031400	negative regulation of protein modification process	15/365	473/28891	0.00111215	0.0341287	0.0279473	Srcin1/Rassf2/Dusp16/Tppp/Apc/Cadm4/Dnajb2/Dusp10/Heg1/Mapt/Slc8a1/Mgat5/Cdk5rap2/Epm2a/Prr5l	15
Oligodendrocyte	CD_vs_HC	CD down	GO:0060420	regulation of heart growth	6/365	92/28891	0.00111722	0.0341287	0.0279473	Prox1/Erbb4/Apc/Ncam1/Fgfr2/Yy1	6
Oligodendrocyte	CD_vs_HC	CD down	GO:0097581	lamellipodium organization	6/365	92/28891	0.00111722	0.0341287	0.0279473	Auts2/Ablim2/Enpp2/Pik3r1/Spata13/Myo9b	6
Oligodendrocyte	CD_vs_HC	CD down	GO:0031122	cytoplasmic microtubule organization	5/365	62/28891	0.00112317	0.0341287	0.0279473	Slain1/Tppp/Dlg1/Apc/Axin1	5
Oligodendrocyte	CD_vs_HC	CD down	GO:0030900	forebrain development	14/365	425/28891	0.00112854	0.0341287	0.0279473	Cdh2/Prox1/Sox2/Erbb4/Tyro3/App/Kirrel3/Zeb2/Ncam1/Fgfr2/Alk/Btbd3/Crk/Ogdh	14
Oligodendrocyte	CD_vs_HC	CD down	GO:0050678	regulation of epithelial cell proliferation	14/365	426/28891	0.00115386	0.0345961	0.0283301	Prox1/Mtss1/Ptn/Sox2/Erbb4/Dlg1/Apc/Fa2h/Tgfa/Dusp10/Srsf6/Fgfr2/Xbp1/Atf2	14
Oligodendrocyte	CD_vs_HC	CD down	GO:0070306	lens fiber cell differentiation	4/365	37/28891	0.00119074	0.0348901	0.0285708	Prox1/Zeb2/Fgfr2/Tmod1	4
Oligodendrocyte	CD_vs_HC	CD down	GO:0035728	response to hepatocyte growth factor	3/365	17/28891	0.00119229	0.0348901	0.0285708	Gab1/Appl2/Crk	3
Oligodendrocyte	CD_vs_HC	CD down	GO:0043010	camera-type eye development	13/365	380/28891	0.0011985	0.0348901	0.0285708	Prox1/Ptn/Sox2/Dlg1/Apc/Clic4/Shroom2/Zeb2/Fgfr2/Fat1/Nectin1/Yy1/Tmod1	13
Oligodendrocyte	CD_vs_HC	CD down	GO:0099172	presynapse organization	5/365	63/28891	0.00120753	0.0348901	0.0285708	App/Efnb3/Grid2/Lrrc4b/Snapin	5
Oligodendrocyte	CD_vs_HC	CD down	GO:0009101	glycoprotein biosynthetic process	11/365	289/28891	0.0012134	0.0348901	0.0285708	Dpy19l1/Chsy3/Rxylt1/Abca2/Hs3st1/Mgat5/Dpy19l4/Cog7/Alg14/B3gat1/Arfgef1	11
Oligodendrocyte	CD_vs_HC	CD down	GO:0010977	negative regulation of neuron projection development	8/365	165/28891	0.00123766	0.0352984	0.0289051	Lpar1/Sema6a/Efnb3/Cers2/Dleu2/Prag1/Mag/Snapin	8
Oligodendrocyte	CD_vs_HC	CD down	GO:0010563	negative regulation of phosphorus metabolic process	14/365	430/28891	0.00125995	0.0353591	0.0289549	Srcin1/Rassf2/Dusp16/Apc/Cadm4/Dusp10/Heg1/Abca2/Mapt/Slc8a1/Mgat5/Cdk5rap2/Epm2a/Prr5l	14
Oligodendrocyte	CD_vs_HC	CD down	GO:0045936	negative regulation of phosphate metabolic process	14/365	430/28891	0.00125995	0.0353591	0.0289549	Srcin1/Rassf2/Dusp16/Apc/Cadm4/Dusp10/Heg1/Abca2/Mapt/Slc8a1/Mgat5/Cdk5rap2/Epm2a/Prr5l	14
Oligodendrocyte	CD_vs_HC	CD down	GO:0090497	mesenchymal cell migration	5/365	64/28891	0.00129649	0.0357987	0.0293149	Cdh2/Sox10/Erbb4/Sema6a/Zeb2	5
Oligodendrocyte	CD_vs_HC	CD down	GO:0035249	synaptic transmission, glutamatergic	7/365	129/28891	0.00129862	0.0357987	0.0293149	Cdh2/Gria4/Grik2/Grm3/Grid2/Napa/Grik4	7
Oligodendrocyte	CD_vs_HC	CD down	GO:0032984	protein-containing complex disassembly	10/365	248/28891	0.00130622	0.0357987	0.0293149	Dnajc6/Stmn4/Apc/Shroom2/Napa/Map6d1/Add3/Nckap5/Snapin/Tmod1	10
Oligodendrocyte	CD_vs_HC	CD down	GO:0031099	regeneration	8/365	167/28891	0.00133652	0.0363449	0.0297621	Ptn/Erbb4/Ninj2/Cers2/Dusp10/Lifr/Mag/Matn2	8
Oligodendrocyte	CD_vs_HC	CD down	GO:0010639	negative regulation of organelle organization	13/365	387/28891	0.00141039	0.0368639	0.0301871	Lpar1/Pik3r1/Apc/Shroom2/Mapt/Map6d1/Fgfr2/Tmeff2/Cdk5rap2/Tbcd/Add3/Tmod1/Arfgef1	13
Oligodendrocyte	CD_vs_HC	CD down	GO:0045837	negative regulation of membrane potential	3/365	18/28891	0.00141742	0.0368639	0.0301871	Ptn/Mapt/Rnf122	3
Oligodendrocyte	CD_vs_HC	CD down	GO:0007009	plasma membrane organization	8/365	169/28891	0.00144155	0.0368639	0.0301871	Mtss1/Bin1/Syt11/Fa2h/Micall1/Ano4/Tmeff2/Ank2	8
Oligodendrocyte	CD_vs_HC	CD down	GO:0050680	negative regulation of epithelial cell proliferation	8/365	169/28891	0.00144155	0.0368639	0.0301871	Mtss1/Ptn/Sox2/Dlg1/Apc/Dusp10/Fgfr2/Atf2	8
Oligodendrocyte	CD_vs_HC	CD down	GO:0014002	astrocyte development	4/365	39/28891	0.00145382	0.0368639	0.0301871	App/Tspan2/Zeb2/Plp1	4
Oligodendrocyte	CD_vs_HC	CD down	GO:0060292	long-term synaptic depression	4/365	39/28891	0.00145382	0.0368639	0.0301871	Grid2/Mapt/Sorcs3/Slc24a2	4
Oligodendrocyte	CD_vs_HC	CD down	GO:0099170	postsynaptic modulation of chemical synaptic transmission	4/365	39/28891	0.00145382	0.0368639	0.0301871	Ppp3ca/Grm3/Sorcs3/Tent2	4
Oligodendrocyte	CD_vs_HC	CD down	GO:1905606	regulation of presynapse assembly	4/365	39/28891	0.00145382	0.0368639	0.0301871	App/Efnb3/Grid2/Lrrc4b	4
Oligodendrocyte	CD_vs_HC	CD down	GO:0007411	axon guidance	10/365	252/28891	0.00147119	0.0368639	0.0301871	Dscaml1/Klf7/App/Sema6a/Efnb3/Unc5c/Unc5b/Ncam1/Nectin1/Matn2	10
Oligodendrocyte	CD_vs_HC	CD down	GO:0097485	neuron projection guidance	10/365	252/28891	0.00147119	0.0368639	0.0301871	Dscaml1/Klf7/App/Sema6a/Efnb3/Unc5c/Unc5b/Ncam1/Nectin1/Matn2	10
Oligodendrocyte	CD_vs_HC	CD down	GO:0099173	postsynapse organization	10/365	252/28891	0.00147119	0.0368639	0.0301871	Cdh2/Srcin1/Dip2a/Ptn/App/Grid2/Lrrc4b/Lrrc4/Dock10/Crk	10
Oligodendrocyte	CD_vs_HC	CD down	GO:0071900	regulation of protein serine/threonine kinase activity	12/365	343/28891	0.00151646	0.0377279	0.0308946	Prox1/Dusp16/App/Apc/Gab1/Dusp10/Heg1/Zeb2/Slc8a1/Axin1/Cdk5rap2/Cdk12	12
Oligodendrocyte	CD_vs_HC	CD down	GO:0007405	neuroblast proliferation	6/365	98/28891	0.00154848	0.0377279	0.0308946	Sox10/Prox1/Ptn/Sox2/Hhip/Fgfr2	6
Oligodendrocyte	CD_vs_HC	CD down	GO:0099072	regulation of postsynaptic membrane neurotransmitter receptor levels	7/365	133/28891	0.00154869	0.0377279	0.0308946	Lpar1/Erbb4/Rap1a/Dlg1/Erbin/Myo6/Clstn1	7
Oligodendrocyte	CD_vs_HC	CD down	GO:1902414	protein localization to cell junction	7/365	133/28891	0.00154869	0.0377279	0.0308946	Erbb4/Rap1a/Dlg1/Heg1/Mapt/Nectin1/Clstn1	7
Oligodendrocyte	CD_vs_HC	CD down	GO:0021953	central nervous system neuron differentiation	9/365	212/28891	0.00158444	0.0381689	0.0312557	Prox1/Sox2/Arhgef28/Nkx2-2/Grid2/Zeb2/Fgfr2/Ogdh/Ldb1	9
Oligodendrocyte	CD_vs_HC	CD down	GO:0086004	regulation of cardiac muscle cell contraction	4/365	40/28891	0.00159944	0.0381689	0.0312557	Bin1/Dlg1/Pde4b/Ank2	4
Oligodendrocyte	CD_vs_HC	CD down	GO:1903725	regulation of phospholipid metabolic process	4/365	40/28891	0.00159944	0.0381689	0.0312557	Erbb4/Abca2/Mtmr4/Mtmr3	4
Oligodendrocyte	CD_vs_HC	CD down	GO:0030148	sphingolipid biosynthetic process	6/365	99/28891	0.00163118	0.0386633	0.0316606	Ugt8a/Fa2h/Cers2/Abca2/Samd8/Kdsr	6
Oligodendrocyte	CD_vs_HC	CD down	GO:1900452	regulation of long-term synaptic depression	3/365	19/28891	0.00166751	0.0389976	0.0319343	Grid2/Mapt/Sorcs3	3
Oligodendrocyte	CD_vs_HC	CD down	GO:1905874	regulation of postsynaptic density organization	3/365	19/28891	0.00166751	0.0389976	0.0319343	Cdh2/Grid2/Lrrc4b	3
Oligodendrocyte	CD_vs_HC	CD down	GO:0010927	cellular component assembly involved in morphogenesis	7/365	135/28891	0.00168702	0.0391925	0.032094	Ugt8a/Phldb1/Prox1/Tppp/Abca2/Mag/Tmod1	7
Oligodendrocyte	CD_vs_HC	CD down	GO:0006368	transcription elongation by RNA polymerase II	6/365	100/28891	0.00171718	0.0396307	0.0324528	Sox10/Axin1/Ldb1/Ccnk/Iws1/Cdk12	6
Oligodendrocyte	CD_vs_HC	CD down	GO:0046467	membrane lipid biosynthetic process	7/365	136/28891	0.00175969	0.0402814	0.0329856	Ugt8a/Fa2h/Cers2/Piga/Abca2/Samd8/Kdsr	7
Oligodendrocyte	CD_vs_HC	CD down	GO:0006397	mRNA processing	15/365	496/28891	0.00176834	0.0402814	0.0329856	App/Clasrp/Snrpf/Hnrnph1/Srsf6/Cirbp/Pan2/Mbnl2/Wdr33/Tent2/Prpf40b/Rbm3/Rbm39/Iws1/Cdk12	15
Oligodendrocyte	CD_vs_HC	CD down	GO:0030282	bone mineralization	7/365	137/28891	0.00183477	0.0412587	0.033786	Ank/Mtss1/Gpm6b/Ptn/Slc8a1/Fgfr2/Fbn2	7
Oligodendrocyte	CD_vs_HC	CD down	GO:2000177	regulation of neural precursor cell proliferation	7/365	137/28891	0.00183477	0.0412587	0.033786	Cdh2/Sox10/Prox1/Ptn/Sox2/Gjc2/Appl2	7
Oligodendrocyte	CD_vs_HC	CD down	GO:1990778	protein localization to cell periphery	13/365	400/28891	0.00188659	0.0421539	0.034519	Cdh2/Mal/Erbb4/Rap1a/Pls1/Dlg1/Pik3r1/Tspan15/Abca2/Epm2a/Rab7/Ank2/Clstn1	13
Oligodendrocyte	CD_vs_HC	CD down	GO:0031032	actomyosin structure organization	9/365	218/28891	0.00191698	0.0425617	0.034853	Prox1/Lpar1/Prkcq/Pik3r1/Zeb2/Frmd5/Sorbs3/Tmeff2/Tmod1	9
Oligodendrocyte	CD_vs_HC	CD down	GO:2000758	positive regulation of peptidyl-lysine acetylation	3/365	20/28891	0.00194352	0.0428797	0.0351134	Auts2/Dip2a/App	3
Oligodendrocyte	CD_vs_HC	CD down	GO:0043161	proteasome-mediated ubiquitin-dependent protein catabolic process	14/365	451/28891	0.00196021	0.0429777	0.0351936	Rybp/Apc/Dnajb2/Araf/Trim2/Ubr3/Usp19/Axin1/Ube2w/Ube2n/Epm2a/Siah2/Sh3bgrl/Rnf122	14
Oligodendrocyte	CD_vs_HC	CD down	GO:0050807	regulation of synapse organization	11/365	309/28891	0.00205583	0.0447942	0.0366811	Cdh2/Srcin1/Ptn/App/Pik3r1/Cttnbp2/Efnb3/Grid2/Lrrc4b/Nectin1/Clstn1	11
Oligodendrocyte	CD_vs_HC	CD down	GO:0099174	regulation of presynapse organization	4/365	43/28891	0.00209665	0.0451231	0.0369504	App/Efnb3/Grid2/Lrrc4b	4
Oligodendrocyte	CD_vs_HC	CD down	GO:1901983	regulation of protein acetylation	4/365	43/28891	0.00209665	0.0451231	0.0369504	Auts2/Dip2a/App/Xbp1	4
Oligodendrocyte	CD_vs_HC	CD down	GO:0032886	regulation of microtubule-based process	10/365	265/28891	0.00212786	0.0455154	0.0372717	Phldb1/Slain1/Stmn4/Tppp/Trim36/Apc/Mapt/Map6d1/Cdk5rap2/Tbcd	10
Oligodendrocyte	CD_vs_HC	CD down	GO:0055117	regulation of cardiac muscle contraction	5/365	72/28891	0.00219187	0.0462945	0.0379097	Bin1/Dlg1/Slc8a1/Pde4b/Ank2	5
Oligodendrocyte	CD_vs_HC	CD down	GO:0006913	nucleocytoplasmic transport	12/365	359/28891	0.00221284	0.0462945	0.0379097	Prkcq/Dusp16/Pik3r1/Ppp3ca/Wipf1/Appl2/Ipo13/Axin1/Xbp1/Epm2a/Atf2/Iws1	12
Oligodendrocyte	CD_vs_HC	CD down	GO:0051169	nuclear transport	12/365	359/28891	0.00221284	0.0462945	0.0379097	Prkcq/Dusp16/Pik3r1/Ppp3ca/Wipf1/Appl2/Ipo13/Axin1/Xbp1/Epm2a/Atf2/Iws1	12
Oligodendrocyte	CD_vs_HC	CD down	GO:0007254	JNK cascade	8/365	181/28891	0.00221707	0.0462945	0.0379097	Rassf2/Dusp16/App/Grik2/Dusp10/Axin1/Crk/Atf2	8
Oligodendrocyte	CD_vs_HC	CD down	GO:0035268	protein mannosylation	3/365	21/28891	0.00224636	0.0466285	0.0381832	Dpy19l1/Rxylt1/Dpy19l4	3
Oligodendrocyte	CD_vs_HC	CD down	GO:0006606	protein import into nucleus	8/365	182/28891	0.00229411	0.0473397	0.0387656	Prkcq/Pik3r1/Ppp3ca/Appl2/Ipo13/Xbp1/Epm2a/Atf2	8
Oligodendrocyte	CD_vs_HC	CD down	GO:0006665	sphingolipid metabolic process	7/365	144/28891	0.00243228	0.0498972	0.0408598	Ugt8a/Enpp2/Fa2h/Cers2/Abca2/Samd8/Kdsr	7
Exc_DCN	CD_vs_HC	CD up	GO:0002176	male germ cell proliferation	1/2	12/28891	0.00083055	0.0129904		Ptgds	1
Exc_DCN	CD_vs_HC	CD up	GO:0036093	germ cell proliferation	1/2	14/28891	0.000968942	0.0129904		Ptgds	1
Exc_DCN	CD_vs_HC	CD up	GO:0006123	mitochondrial electron transport, cytochrome c to oxygen	1/2	19/28891	0.00131488	0.0129904		Cox5a	1
Exc_DCN	CD_vs_HC	CD up	GO:0045187	regulation of circadian sleep/wake cycle, sleep	1/2	29/28891	0.00200657	0.0129904		Ptgds	1
Exc_DCN	CD_vs_HC	CD up	GO:0050802	circadian sleep/wake cycle, sleep	1/2	31/28891	0.00214488	0.0129904		Ptgds	1
Exc_DCN	CD_vs_HC	CD up	GO:0001516	prostaglandin biosynthetic process	1/2	32/28891	0.00221403	0.0129904		Ptgds	1
Exc_DCN	CD_vs_HC	CD up	GO:0042749	regulation of circadian sleep/wake cycle	1/2	32/28891	0.00221403	0.0129904		Ptgds	1
Exc_DCN	CD_vs_HC	CD up	GO:0046457	prostanoid biosynthetic process	1/2	32/28891	0.00221403	0.0129904		Ptgds	1
Exc_DCN	CD_vs_HC	CD up	GO:0022410	circadian sleep/wake cycle process	1/2	34/28891	0.00235233	0.0129904		Ptgds	1
Exc_DCN	CD_vs_HC	CD up	GO:0030431	sleep	1/2	36/28891	0.00249062	0.0129904		Ptgds	1
Exc_DCN	CD_vs_HC	CD up	GO:0042745	circadian sleep/wake cycle	1/2	40/28891	0.00276716	0.0129904		Ptgds	1
Exc_DCN	CD_vs_HC	CD up	GO:0006636	unsaturated fatty acid biosynthetic process	1/2	43/28891	0.00297454	0.0129904		Ptgds	1
Exc_DCN	CD_vs_HC	CD up	GO:0046456	icosanoid biosynthetic process	1/2	53/28891	0.00366566	0.0129904		Ptgds	1
Exc_DCN	CD_vs_HC	CD up	GO:0006693	prostaglandin metabolic process	1/2	57/28891	0.00394204	0.0129904		Ptgds	1
Exc_DCN	CD_vs_HC	CD up	GO:0006692	prostanoid metabolic process	1/2	58/28891	0.00401113	0.0129904		Ptgds	1
Exc_DCN	CD_vs_HC	CD up	GO:0019646	aerobic electron transport chain	1/2	64/28891	0.00442561	0.0129904		Cox5a	1
Exc_DCN	CD_vs_HC	CD up	GO:0048512	circadian behavior	1/2	66/28891	0.00456376	0.0129904		Ptgds	1
Exc_DCN	CD_vs_HC	CD up	GO:0007622	rhythmic behavior	1/2	69/28891	0.00477095	0.0129904		Ptgds	1
Exc_DCN	CD_vs_HC	CD up	GO:0043303	mast cell degranulation	1/2	69/28891	0.00477095	0.0129904		Ptgds	1
Exc_DCN	CD_vs_HC	CD up	GO:0002448	mast cell mediated immunity	1/2	71/28891	0.00490907	0.0129904		Ptgds	1
Exc_DCN	CD_vs_HC	CD up	GO:0002279	mast cell activation involved in immune response	1/2	72/28891	0.00497813	0.0129904		Ptgds	1
Exc_DCN	CD_vs_HC	CD up	GO:0042775	mitochondrial ATP synthesis coupled electron transport	1/2	80/28891	0.00553048	0.0129904		Cox5a	1
Exc_DCN	CD_vs_HC	CD up	GO:0042773	ATP synthesis coupled electron transport	1/2	82/28891	0.00566855	0.0129904		Cox5a	1
Exc_DCN	CD_vs_HC	CD up	GO:2000242	negative regulation of reproductive process	1/2	82/28891	0.00566855	0.0129904		Ptgds	1
Exc_DCN	CD_vs_HC	CD up	GO:0043299	leukocyte degranulation	1/2	97/28891	0.00670374	0.0136813		Ptgds	1
Exc_DCN	CD_vs_HC	CD up	GO:0045576	mast cell activation	1/2	97/28891	0.00670374	0.0136813		Ptgds	1
Exc_DCN	CD_vs_HC	CD up	GO:0032418	lysosome localization	1/2	102/28891	0.00704868	0.0136813		Ptgds	1
Exc_DCN	CD_vs_HC	CD up	GO:1990849	vacuolar localization	1/2	102/28891	0.00704868	0.0136813		Ptgds	1
Exc_DCN	CD_vs_HC	CD up	GO:0022904	respiratory electron transport chain	1/2	106/28891	0.00732459	0.0136813		Cox5a	1
Exc_DCN	CD_vs_HC	CD up	GO:0050795	regulation of behavior	1/2	108/28891	0.00746253	0.0136813		Ptgds	1
Exc_DCN	CD_vs_HC	CD up	GO:0022900	electron transport chain	1/2	116/28891	0.0080142	0.0141299		Cox5a	1
Exc_DCN	CD_vs_HC	CD up	GO:0002275	myeloid cell activation involved in immune response	1/2	119/28891	0.00822104	0.0141299		Ptgds	1
Exc_DCN	CD_vs_HC	CD up	GO:0042752	regulation of circadian rhythm	1/2	127/28891	0.00877249	0.0146208		Ptgds	1
Exc_DCN	CD_vs_HC	CD up	GO:0033559	unsaturated fatty acid metabolic process	1/2	140/28891	0.00966828	0.0155077		Ptgds	1
Exc_DCN	CD_vs_HC	CD up	GO:0006119	oxidative phosphorylation	1/2	147/28891	0.0101505	0.0155077		Cox5a	1
Exc_DCN	CD_vs_HC	CD up	GO:0006690	icosanoid metabolic process	1/2	147/28891	0.0101505	0.0155077		Ptgds	1
Exc_DCN	CD_vs_HC	CD up	GO:0002444	myeloid leukocyte mediated immunity	1/2	158/28891	0.0109079	0.0160867		Ptgds	1
Exc_DCN	CD_vs_HC	CD up	GO:0006633	fatty acid biosynthetic process	1/2	161/28891	0.0111145	0.0160867		Ptgds	1
Exc_DCN	CD_vs_HC	CD up	GO:0009060	aerobic respiration	1/2	196/28891	0.0135224	0.0190701		Cox5a	1
Exc_DCN	CD_vs_HC	CD up	GO:2000241	regulation of reproductive process	1/2	225/28891	0.0155154	0.0205876		Ptgds	1
Exc_DCN	CD_vs_HC	CD up	GO:0072330	monocarboxylic acid biosynthetic process	1/2	227/28891	0.0156528	0.0205876		Ptgds	1
Exc_DCN	CD_vs_HC	CD up	GO:0007623	circadian rhythm	1/2	228/28891	0.0157215	0.0205876		Ptgds	1
Exc_DCN	CD_vs_HC	CD up	GO:0045333	cellular respiration	1/2	254/28891	0.0175063	0.0223918		Cox5a	1
Exc_DCN	CD_vs_HC	CD up	GO:0045055	regulated exocytosis	1/2	267/28891	0.0183982	0.0229977		Ptgds	1
Exc_DCN	CD_vs_HC	CD up	GO:0002274	myeloid leukocyte activation	1/2	280/28891	0.0192896	0.0235762		Ptgds	1
Exc_DCN	CD_vs_HC	CD up	GO:0048511	rhythmic process	1/2	317/28891	0.0218245	0.0255127		Ptgds	1
Exc_DCN	CD_vs_HC	CD up	GO:0046394	carboxylic acid biosynthetic process	1/2	321/28891	0.0220984	0.0255127		Ptgds	1
Exc_DCN	CD_vs_HC	CD up	GO:0016053	organic acid biosynthetic process	1/2	324/28891	0.0223037	0.0255127		Ptgds	1
Exc_DCN	CD_vs_HC	CD up	GO:0002366	leukocyte activation involved in immune response	1/2	333/28891	0.0229197	0.0255127		Ptgds	1
Exc_DCN	CD_vs_HC	CD up	GO:0002263	cell activation involved in immune response	1/2	337/28891	0.0231934	0.0255127		Ptgds	1
Exc_DCN	CD_vs_HC	CD up	GO:0015980	energy derivation by oxidation of organic compounds	1/2	350/28891	0.0240827	0.0259715		Cox5a	1
Exc_DCN	CD_vs_HC	CD up	GO:0006887	exocytosis	1/2	395/28891	0.0271577	0.0287245		Ptgds	1
Exc_DCN	CD_vs_HC	CD up	GO:0006631	fatty acid metabolic process	1/2	463/28891	0.0317952	0.032995		Ptgds	1
Exc_DCN	CD_vs_HC	CD up	GO:0006091	generation of precursor metabolites and energy	1/2	484/28891	0.0332252	0.0337016		Cox5a	1
Exc_DCN	CD_vs_HC	CD up	GO:0051656	establishment of organelle localization	1/2	491/28891	0.0337016	0.0337016		Ptgds	1
Exc_DCN	CD_vs_HC	CD down	GO:0022618	protein-RNA complex assembly	2/11	175/28891	0.00193568	0.048308	0.0243198	Snrpf/Rsrp1	2
Exc_DCN	CD_vs_HC	CD down	GO:0071826	protein-RNA complex organization	2/11	183/28891	0.00211372	0.048308	0.0243198	Snrpf/Rsrp1	2
Exc_DCN	CD_vs_HC	CD down	GO:0010642	negative regulation of platelet-derived growth factor receptor signaling pathway	1/11	13/28891	0.00493937	0.048308	0.0243198	Ndrg4	1
Exc_DCN	CD_vs_HC	CD down	GO:0000375	RNA splicing, via transesterification reactions	2/11	304/28891	0.00570068	0.048308	0.0243198	Snrpf/Rsrp1	2
Exc_DCN	CD_vs_HC	CD down	GO:0000377	RNA splicing, via transesterification reactions with bulged adenosine as nucleophile	2/11	304/28891	0.00570068	0.048308	0.0243198	Snrpf/Rsrp1	2
Exc_DCN	CD_vs_HC	CD down	GO:0000398	mRNA splicing, via spliceosome	2/11	304/28891	0.00570068	0.048308	0.0243198	Snrpf/Rsrp1	2
Exc_DCN	CD_vs_HC	CD down	GO:0007611	learning or memory	2/11	331/28891	0.00672229	0.048308	0.0243198	Paip2/Ndrg4	2
Exc_DCN	CD_vs_HC	CD down	GO:0045947	negative regulation of translational initiation	1/11	20/28891	0.00758983	0.048308	0.0243198	Paip2	1
Exc_DCN	CD_vs_HC	CD down	GO:0060973	cell migration involved in heart development	1/11	20/28891	0.00758983	0.048308	0.0243198	Ndrg4	1
Exc_DCN	CD_vs_HC	CD down	GO:2001135	regulation of endocytic recycling	1/11	22/28891	0.00834593	0.048308	0.0243198	Ndrg4	1
Exc_DCN	CD_vs_HC	CD down	GO:0050890	cognition	2/11	371/28891	0.00837806	0.048308	0.0243198	Paip2/Ndrg4	2
Exc_DCN	CD_vs_HC	CD down	GO:0006144	purine nucleobase metabolic process	1/11	23/28891	0.00872378	0.048308	0.0243198	Ttr	1
Exc_DCN	CD_vs_HC	CD down	GO:0010640	regulation of platelet-derived growth factor receptor signaling pathway	1/11	24/28891	0.0091015	0.048308	0.0243198	Ndrg4	1
Inh_DCN	CD_vs_HC	CD up	GO:0016358	dendrite development	31/437	327/28891	5.42404e-16	1.99279e-12	1.52901e-12	Sdk1/Robo1/Epha5/Ptprd/Klhl1/Grip1/Dgkg/Prkg1/Tanc2/Cntnap2/Camk2b/Kalrn/Ephb1/Apoe/Nrp1/Lrp8/Csmd3/Alk/Mapk8/Camk1/Prickle1/Prex2/Ctnna2/Cask/Map1b/D130043K22Rik/Bcl11a/Dnm3/Kif1a/Cux1/Map2	31
Inh_DCN	CD_vs_HC	CD up	GO:0050807	regulation of synapse organization	29/437	309/28891	6.33205e-15	1.1632e-11	8.92486e-12	Robo1/Ptprd/Nrg1/Lrrtm3/Lingo2/Elavl2/Clstn2/Adgrl2/Slit2/Lrrtm4/Tanc2/Camk2b/Kalrn/Ephb1/Apoe/Epha7/Lrp8/Lrfn2/Camk1/Dgkb/Lrfn5/Ctnna2/Cdh8/Cask/Slitrk1/Dnm3/Kif1a/Ogt/Mycbp2	29
Inh_DCN	CD_vs_HC	CD up	GO:0050803	regulation of synapse structure or activity	29/437	317/28891	1.2325e-14	1.5094e-11	1.15811e-11	Robo1/Ptprd/Nrg1/Lrrtm3/Lingo2/Elavl2/Clstn2/Adgrl2/Slit2/Lrrtm4/Tanc2/Camk2b/Kalrn/Ephb1/Apoe/Epha7/Lrp8/Lrfn2/Camk1/Dgkb/Lrfn5/Ctnna2/Cdh8/Cask/Slitrk1/Dnm3/Kif1a/Ogt/Mycbp2	29
Inh_DCN	CD_vs_HC	CD up	GO:0034329	cell junction assembly	34/437	481/28891	1.22011e-13	1.12067e-10	8.59855e-11	Cntn5/Robo1/Cdh18/Ptprd/Nrg1/Lrrtm3/Lingo2/Elavl2/Clstn2/Adgrl2/Pcdh17/Pard3/Slit2/Lrrtm4/Cntnap2/Dlc1/Cdh10/Ephb1/Apod/Epha7/Nrp1/Add2/Dlg1/Nrg3/Lrfn5/Cdh8/Slitrk1/Dnm3/Cd9/Gja1/Ogt/Pkn2/Mycbp2/Dst	34
Inh_DCN	CD_vs_HC	CD up	GO:0007416	synapse assembly	22/437	222/28891	4.19228e-12	3.08048e-09	2.36356e-09	Cntn5/Robo1/Ptprd/Nrg1/Lrrtm3/Lingo2/Elavl2/Clstn2/Adgrl2/Pcdh17/Slit2/Lrrtm4/Cntnap2/Ephb1/Epha7/Add2/Nrg3/Lrfn5/Slitrk1/Dnm3/Ogt/Mycbp2	22
Inh_DCN	CD_vs_HC	CD up	GO:0098742	cell-cell adhesion via plasma-membrane adhesion molecules	21/437	211/28891	1.19345e-11	7.3079e-09	5.60712e-09	Pcdh15/Cntn5/Robo1/Cdh18/Ptprd/Nrg1/Clstn2/Robo2/Pcdh17/Tenm3/Alcam/Cdh10/Tenm1/Pcdh10/Ntng1/Tenm2/Pik3cb/Lrfn5/Pcdh19/Cdh8/Slitrk1	21
Inh_DCN	CD_vs_HC	CD up	GO:0031346	positive regulation of cell projection organization	30/437	463/28891	3.08258e-11	1.61792e-08	1.24138e-08	Robo1/Ptprd/Nrg1/Grip1/Robo2/Tenm3/Camk2b/Tenm1/Kalrn/Apoe/Nrp1/Lrp8/Gprc5b/Hsp90aa1/Stmn2/Alk/Camk1/Dmd/Tox/Cep135/Cpeb1/Atp8a2/Cask/Map1b/Slitrk1/Bcl11a/Rhoq/Dnm3/Ahi1/Cux1	30
Inh_DCN	CD_vs_HC	CD up	GO:0051962	positive regulation of nervous system development	27/437	391/28891	7.39291e-11	3.3952e-08	2.60503e-08	Robo1/Ptprd/Nrg1/Grip1/Lrrtm3/Lingo2/Clstn2/Grm5/Robo2/Adgrl2/Slit2/Lrrtm4/Camk2b/Trf/Kalrn/Ephb1/Apoe/Nrp1/Lrp8/Mapk8/Rtn4/Cask/Cdon/Map1b/Slitrk1/Bcl11a/Cux1	27
Inh_DCN	CD_vs_HC	CD up	GO:0042391	regulation of membrane potential	30/437	491/28891	1.28805e-10	5.25809e-08	4.03437e-08	Ctnna3/Grik2/Cacna2d1/Kcnh7/Kcnip1/Kcnmb2/Cntnap2/Pex5l/Gabrb1/Kcnd2/Kcnc2/Slc24a4/Scn3a/Celf4/Neto1/Dlg1/Kcnh1/Ubb/Prkar1b/Dmd/Kcnk10/Tmem108/Scn2a/Nalcn/Glra3/Gja1/Fgf14/Rims1/Rims2/Ank3	30
Inh_DCN	CD_vs_HC	CD up	GO:0050767	regulation of neurogenesis	30/437	494/28891	1.49175e-10	5.4807e-08	4.20517e-08	Robo1/Ptprd/Nrg1/Grip1/Grm5/Robo2/Slit2/Camk2b/Trf/Kalrn/Sema6d/Apoe/Epha7/Nrp1/Lrp8/Brinp1/Mapk8/Pcm1/Dip2b/Rb1/Rtn4/Cask/Cdon/Map1b/Slitrk1/D130043K22Rik/Bcl11a/Cux1/Map2/Ttc3	30
Inh_DCN	CD_vs_HC	CD up	GO:1901888	regulation of cell junction assembly	21/437	246/28891	2.14511e-10	7.16466e-08	5.49723e-08	Robo1/Ptprd/Nrg1/Lrrtm3/Lingo2/Elavl2/Clstn2/Adgrl2/Slit2/Lrrtm4/Cntnap2/Dlc1/Ephb1/Apod/Epha7/Nrp1/Lrfn5/Slitrk1/Gja1/Ogt/Mycbp2	21
Inh_DCN	CD_vs_HC	CD up	GO:0007626	locomotory behavior	22/437	273/28891	2.40499e-10	7.36329e-08	5.64963e-08	Pcdh15/Zfhx3/Nrg1/Klhl1/Grm5/Cntnap2/Kcnd2/Kalrn/Apoe/Htr2c/Sez6l/Npc1/Pbx3/Gprc5b/Alk/Uchl1/Dmd/Prex2/Gaa/Oprk1/Slc1a1/Fgf14	22
Inh_DCN	CD_vs_HC	CD up	GO:0030900	forebrain development	27/437	425/28891	4.72705e-10	1.33594e-07	1.02502e-07	Robo1/Epha5/Nrg1/Robo2/Slit2/Prkg1/Chd5/Cntnap2/Ptchd1/Dlc1/Mrtfb/Nrp1/Lrp8/Foxp2/Alk/Ubb/Nrg3/Pcm1/Tox/Pou3f2/Rtn4/Tmem108/Kif3a/Cdon/Scn2a/Kif1a/Ncam1	27
Inh_DCN	CD_vs_HC	CD up	GO:1990138	neuron projection extension	19/437	211/28891	6.3701e-10	1.64444e-07	1.26173e-07	Robo1/Slit2/Slit3/Sema6d/Apoe/Nrp1/Hsp90aa1/Prickle1/Dip2b/Rtn4/Tmem108/Hsp90ab1/Map1b/D130043K22Rik/Bcl11a/Map2/Rims1/Rims2/Ttc3	19
Inh_DCN	CD_vs_HC	CD up	GO:0051963	regulation of synapse assembly	16/437	144/28891	6.71382e-10	1.64444e-07	1.26173e-07	Robo1/Ptprd/Nrg1/Lrrtm3/Lingo2/Elavl2/Clstn2/Adgrl2/Slit2/Lrrtm4/Ephb1/Epha7/Lrfn5/Slitrk1/Ogt/Mycbp2	16
Inh_DCN	CD_vs_HC	CD up	GO:0048588	developmental cell growth	22/437	291/28891	8.06945e-10	1.76579e-07	1.35484e-07	Robo1/Slit2/Prkg1/Slit3/Sema6d/Apoe/Epha7/Nrp1/Hsp90aa1/Prickle1/Dip2b/Rtn4/Tmem108/Hsp90ab1/Map1b/D130043K22Rik/Fdps/Bcl11a/Map2/Rims1/Rims2/Ttc3	22
Inh_DCN	CD_vs_HC	CD up	GO:0060560	developmental growth involved in morphogenesis	22/437	292/28891	8.6069e-10	1.76579e-07	1.35484e-07	Robo1/Slit2/Prkg1/Kif26b/Slit3/Sema6d/Apoe/Epha7/Nrp1/Hsp90aa1/Prickle1/Dip2b/Rtn4/Tmem108/Hsp90ab1/Map1b/D130043K22Rik/Bcl11a/Map2/Rims1/Rims2/Ttc3	22
Inh_DCN	CD_vs_HC	CD up	GO:0030534	adult behavior	18/437	191/28891	8.65114e-10	1.76579e-07	1.35484e-07	Pcdh15/Sdk1/Klhl1/Grm7/Pcdh17/Cntnap2/Kalrn/Htr2c/Sez6l/Npc1/Pbx3/Alk/Uchl1/Prex2/Oprk1/Slitrk1/Slc1a1/Fgf14	18
Inh_DCN	CD_vs_HC	CD up	GO:0048813	dendrite morphogenesis	18/437	192/28891	9.41509e-10	1.82058e-07	1.39688e-07	Robo1/Epha5/Ptprd/Grip1/Tanc2/Cntnap2/Camk2b/Kalrn/Ephb1/Nrp1/Lrp8/Mapk8/Prex2/Ctnna2/Cask/Dnm3/Kif1a/Cux1	18
Inh_DCN	CD_vs_HC	CD up	GO:0050770	regulation of axonogenesis	17/437	186/28891	4.06976e-09	7.47615e-07	5.73622e-07	Robo1/Robo2/Slit2/Sema6d/Apoe/Epha7/Nrp1/Chn1/Dip2b/Pou3f2/Rtn4/Map1b/Slitrk1/D130043K22Rik/Bcl11a/Map2/Ttc3	17
Inh_DCN	CD_vs_HC	CD up	GO:0030705	cytoskeleton-dependent intracellular transport	18/437	214/28891	5.34116e-09	9.34449e-07	7.16974e-07	Tanc2/Neto1/Fyco1/Bicd1/Agbl4/Ubb/Uchl1/Pcm1/Prickle1/Tmem108/Lamp1/Kif3a/Map1b/Kif1a/Dlg2/Map2/Dst/Ank3	18
Inh_DCN	CD_vs_HC	CD up	GO:0007411	axon guidance	19/437	252/28891	1.21263e-08	1.85633e-06	1.4243e-06	Cntn5/Robo1/Epha5/Robo2/Slit2/Alcam/Slit3/Kalrn/Sema6d/Ephb1/Epha7/Nrp1/Chn1/Epha6/Ablim1/Tenm2/Ncam1/Mycbp2/Ank3	19
Inh_DCN	CD_vs_HC	CD up	GO:0097485	neuron projection guidance	19/437	252/28891	1.21263e-08	1.85633e-06	1.4243e-06	Cntn5/Robo1/Epha5/Robo2/Slit2/Alcam/Slit3/Kalrn/Sema6d/Ephb1/Epha7/Nrp1/Chn1/Epha6/Ablim1/Tenm2/Ncam1/Mycbp2/Ank3	19
Inh_DCN	CD_vs_HC	CD up	GO:0099173	postsynapse organization	19/437	252/28891	1.21263e-08	1.85633e-06	1.4243e-06	Epha5/Ptprd/Lrrtm4/Tanc2/Cntnap2/Camk2b/Kalrn/Ephb1/Apoe/Epha7/Nrp1/Lrp8/Lrfn2/Tmem108/Dgkb/Cask/Dnm3/Kif1a/Dlg2	19
Inh_DCN	CD_vs_HC	CD up	GO:0051056	regulation of small GTPase mediated signal transduction	18/437	230/28891	1.6525e-08	2.42851e-06	1.86332e-06	Robo1/Nrg1/Garnl3/Slit2/Dlc1/Apoe/Mapre2/Nrp1/Chn1/Arhgef3/Arhgap18/Arhgap24/Rtn4/Lztr1/Pik3cb/Cdon/Rasa3/Ogt	18
Inh_DCN	CD_vs_HC	CD up	GO:0010970	transport along microtubule	16/437	180/28891	1.73623e-08	2.45342e-06	1.88244e-06	Neto1/Fyco1/Bicd1/Agbl4/Ubb/Uchl1/Pcm1/Tmem108/Lamp1/Kif3a/Map1b/Kif1a/Dlg2/Map2/Dst/Ank3	16
Inh_DCN	CD_vs_HC	CD up	GO:0007163	establishment or maintenance of cell polarity	18/437	239/28891	2.99014e-08	3.9235e-06	3.01038e-06	Pard3/Kif26b/Pard3b/Ephb1/Dlg1/Prickle2/Hsp90aa1/Prickle1/Krit1/Hsp90ab1/Kif3a/Map1b/Rhoq/Gja1/Dlg2/Map2/Dst/Ank3	18
Inh_DCN	CD_vs_HC	CD up	GO:0010976	positive regulation of neuron projection development	18/437	239/28891	2.99014e-08	3.9235e-06	3.01038e-06	Nrg1/Tenm3/Camk2b/Kalrn/Apoe/Nrp1/Lrp8/Gprc5b/Stmn2/Alk/Camk1/Dmd/Tox/Cpeb1/Atp8a2/Cask/Bcl11a/Ahi1	18
Inh_DCN	CD_vs_HC	CD up	GO:0010977	negative regulation of neuron projection development	15/437	165/28891	3.59621e-08	4.50057e-06	3.45315e-06	Xylt1/Slit2/Sema6d/Apoe/Epha7/Nrp1/Minar1/Stmn2/Dip2b/Rtn4/D130043K22Rik/Bcl11a/Dnm3/Map2/Ttc3	15
Inh_DCN	CD_vs_HC	CD up	GO:0033555	multicellular organismal response to stress	13/437	120/28891	3.67493e-08	4.50057e-06	3.45315e-06	Grm7/Grik2/Cntnap2/Scn3a/Apoe/Brinp1/Pde8b/Htr2c/Prkar1b/D130043K22Rik/Ncam1/Slc1a1/Gja1	13
Inh_DCN	CD_vs_HC	CD up	GO:0006813	potassium ion transport	18/437	249/28891	5.59631e-08	6.63253e-06	5.08894e-06	Grip1/Kcnh7/Kcnip1/Kcnb2/Kcnmb2/Kcnd2/Kcnc2/Slc24a4/Kcnq5/Neto1/Dlg1/Klhl24/Kcnh1/Kcnk10/Oprk1/Nalcn/Plcb4/Ank3	18
Inh_DCN	CD_vs_HC	CD up	GO:0098930	axonal transport	10/437	67/28891	6.5027e-08	7.46592e-06	5.72837e-06	Neto1/Agbl4/Uchl1/Tmem108/Kif3a/Kif1a/Dlg2/Map2/Dst/Ank3	10
Inh_DCN	CD_vs_HC	CD up	GO:0048638	regulation of developmental growth	23/437	405/28891	7.34395e-08	8.17627e-06	6.2734e-06	Nrg1/Cacna2d2/Slit2/Sema6d/Apoe/Epha7/Nrp1/Dlg1/Dip2b/Pou3f2/Rtn4/Atp8a2/Map1b/D130043K22Rik/Fdps/Bcl11a/Ncam1/Gja1/Map2/Rims1/Rims2/Mycbp2/Ttc3	23
Inh_DCN	CD_vs_HC	CD up	GO:0050771	negative regulation of axonogenesis	10/437	71/28891	1.14726e-07	1.23972e-05	9.51198e-06	Slit2/Sema6d/Epha7/Nrp1/Dip2b/Rtn4/D130043K22Rik/Bcl11a/Map2/Ttc3	10
Inh_DCN	CD_vs_HC	CD up	GO:0099072	regulation of postsynaptic membrane neurotransmitter receptor levels	13/437	133/28891	1.25438e-07	1.31674e-05	1.0103e-05	Gpc6/Nrg1/Grip1/Gsg1l/Neto2/Cntnap2/Kalrn/Neto1/Dlg1/Hsp90aa1/Dnm3/Ogt/Dlg2	13
Inh_DCN	CD_vs_HC	CD up	GO:0060996	dendritic spine development	13/437	134/28891	1.37032e-07	1.39849e-05	1.07302e-05	Sdk1/Epha5/Tanc2/Cntnap2/Camk2b/Kalrn/Ephb1/Apoe/Lrp8/Camk1/Cask/Dnm3/Kif1a	13
Inh_DCN	CD_vs_HC	CD up	GO:0001508	action potential	14/437	158/28891	1.41418e-07	1.40425e-05	1.07743e-05	Ctnna3/Grik2/Cacna2d1/Kcnh7/Kcnip1/Kcnmb2/Cntnap2/Kcnd2/Kcnc2/Scn3a/Dlg1/Dmd/Scn2a/Ank3	14
Inh_DCN	CD_vs_HC	CD up	GO:0071805	potassium ion transmembrane transport	16/437	212/28891	1.70437e-07	1.64785e-05	1.26435e-05	Grip1/Kcnh7/Kcnip1/Kcnb2/Kcnd2/Kcnc2/Slc24a4/Kcnq5/Neto1/Dlg1/Klhl24/Kcnh1/Kcnk10/Oprk1/Nalcn/Ank3	16
Inh_DCN	CD_vs_HC	CD up	GO:0050769	positive regulation of neurogenesis	20/437	329/28891	1.77666e-07	1.67371e-05	1.28418e-05	Robo1/Ptprd/Nrg1/Grip1/Grm5/Robo2/Camk2b/Trf/Kalrn/Apoe/Nrp1/Lrp8/Mapk8/Rtn4/Cask/Cdon/Map1b/Slitrk1/Bcl11a/Cux1	20
Inh_DCN	CD_vs_HC	CD up	GO:0007611	learning or memory	20/437	331/28891	1.95802e-07	1.76521e-05	1.35439e-05	Nrg1/Grm7/Clstn2/Grm5/Cntnap2/Ptchd1/Kalrn/Apoe/Neto1/Brinp1/Pde8b/Foxp2/Prkar1b/Prkar2b/Hmgcr/Oprk1/Scn2a/Ncam1/Slc1a1/Pde4d	20
Inh_DCN	CD_vs_HC	CD up	GO:0007264	small GTPase mediated signal transduction	23/437	428/28891	1.96989e-07	1.76521e-05	1.35439e-05	Robo1/Nrg1/Srgap1/Garnl3/Slit2/Dlc1/Apoe/Mapre2/Nrp1/Chn1/Rasgef1b/Arhgef3/Arhgap18/Arhgap24/Rapgef5/Rtn4/Rapgef6/Lztr1/Pik3cb/Cdon/Rhoq/Rasa3/Ogt	23
Inh_DCN	CD_vs_HC	CD up	GO:0050919	negative chemotaxis	8/437	43/28891	2.34446e-07	2.05084e-05	1.57355e-05	Robo1/Nrg1/Robo2/Slit2/Slit3/Sema6d/Nrg3/Pdgfa	8
Inh_DCN	CD_vs_HC	CD up	GO:0022604	regulation of cell morphogenesis	18/437	277/28891	2.76317e-07	2.36091e-05	1.81145e-05	Ptprd/Grip1/Dlc1/Pakap/Camk2b/Kalrn/Lrp8/Dlg1/Sh3kbp1/Arhgap18/Ntng1/Kif3a/Cask/Bcl11a/Rhoq/Cux1/Rims1/Rims2	18
Inh_DCN	CD_vs_HC	CD up	GO:0048675	axon extension	13/437	143/28891	2.93378e-07	2.44971e-05	1.87959e-05	Slit2/Slit3/Sema6d/Apoe/Nrp1/Hsp90aa1/Dip2b/Rtn4/Hsp90ab1/Map1b/D130043K22Rik/Map2/Ttc3	13
Inh_DCN	CD_vs_HC	CD up	GO:0031345	negative regulation of cell projection organization	16/437	221/28891	3.00079e-07	2.44998e-05	1.87979e-05	Xylt1/Slit2/Sema6d/Apoe/Epha7/Nrp1/Minar1/Stmn2/Arhgap24/Dip2b/Rtn4/D130043K22Rik/Bcl11a/Dnm3/Map2/Ttc3	16
Inh_DCN	CD_vs_HC	CD up	GO:0008361	regulation of cell size	16/437	222/28891	3.1897e-07	2.4934e-05	1.91311e-05	Slit2/Sema6d/Apoe/Epha7/Nrp1/Hsp90aa1/Dip2b/Rtn4/Hsp90ab1/Map1b/D130043K22Rik/Bcl11a/Ogt/Map2/Prkg2/Ttc3	16
Inh_DCN	CD_vs_HC	CD up	GO:0099111	microtubule-based transport	16/437	222/28891	3.1897e-07	2.4934e-05	1.91311e-05	Neto1/Fyco1/Bicd1/Agbl4/Ubb/Uchl1/Pcm1/Tmem108/Lamp1/Kif3a/Map1b/Kif1a/Dlg2/Map2/Dst/Ank3	16
Inh_DCN	CD_vs_HC	CD up	GO:0050773	regulation of dendrite development	13/437	145/28891	3.44718e-07	2.63853e-05	2.02446e-05	Robo1/Ptprd/Grip1/Dgkg/Camk2b/Kalrn/Lrp8/Csmd3/Alk/Cask/D130043K22Rik/Bcl11a/Cux1	13
Inh_DCN	CD_vs_HC	CD up	GO:0042596	fear response	9/437	63/28891	4.38732e-07	3.2896e-05	2.52401e-05	Grm7/Grik2/Apoe/Brinp1/Pde8b/Htr2c/Prkar1b/Slc1a1/Gja1	9
Inh_DCN	CD_vs_HC	CD up	GO:0034765	regulation of monoatomic ion transmembrane transport	24/437	490/28891	5.73216e-07	4.21199e-05	3.23173e-05	Grip1/Cacna2d1/Grm5/Kcnh7/Kcnip1/Kcnb2/Cacna2d2/Kcnd2/Kcnc2/Scn3a/Kcnq5/Neto1/Plp1/Dlg1/Klhl24/Atp2b4/Kcnh1/Dmd/Oprk1/Scn2a/Nalcn/Fgf14/Pde4d/Ank3	24
Inh_DCN	CD_vs_HC	CD up	GO:0030308	negative regulation of cell growth	15/437	205/28891	6.14374e-07	4.4259e-05	3.39586e-05	Slit2/Slit3/Sema6d/Epha7/Nrp1/Minar1/Dip2b/Rb1/Sesn1/Rtn4/D130043K22Rik/Bcl11a/Gja1/Map2/Ttc3	15
Inh_DCN	CD_vs_HC	CD up	GO:0061387	regulation of extent of cell growth	12/437	129/28891	6.55167e-07	4.62901e-05	3.5517e-05	Slit2/Sema6d/Apoe/Epha7/Nrp1/Dip2b/Rtn4/Map1b/D130043K22Rik/Bcl11a/Map2/Ttc3	12
Inh_DCN	CD_vs_HC	CD up	GO:0030517	negative regulation of axon extension	8/437	49/28891	6.73533e-07	4.66898e-05	3.58237e-05	Slit2/Sema6d/Nrp1/Dip2b/Rtn4/D130043K22Rik/Map2/Ttc3	8
Inh_DCN	CD_vs_HC	CD up	GO:0060998	regulation of dendritic spine development	10/437	86/28891	7.19071e-07	4.89234e-05	3.75375e-05	Sdk1/Tanc2/Camk2b/Kalrn/Apoe/Lrp8/Camk1/Cask/Dnm3/Kif1a	10
Inh_DCN	CD_vs_HC	CD up	GO:0097061	dendritic spine organization	11/437	108/28891	7.74242e-07	5.17194e-05	3.96827e-05	Epha5/Tanc2/Cntnap2/Camk2b/Kalrn/Ephb1/Apoe/Lrp8/Cask/Dnm3/Kif1a	11
Inh_DCN	CD_vs_HC	CD up	GO:0008088	axo-dendritic transport	10/437	87/28891	8.01612e-07	5.25915e-05	4.03518e-05	Neto1/Agbl4/Uchl1/Tmem108/Kif3a/Kif1a/Dlg2/Map2/Dst/Ank3	10
Inh_DCN	CD_vs_HC	CD up	GO:0007156	homophilic cell adhesion via plasma membrane adhesion molecules	11/437	109/28891	8.49586e-07	5.40593e-05	4.14781e-05	Pcdh15/Cntn5/Robo1/Clstn2/Robo2/Tenm3/Cdh10/Pcdh10/Pik3cb/Pcdh19/Cdh8	11
Inh_DCN	CD_vs_HC	CD up	GO:0051961	negative regulation of nervous system development	14/437	183/28891	8.53414e-07	5.40593e-05	4.14781e-05	Robo1/Slit2/Sema6d/Epha7/Nrp1/Brinp1/Pcm1/Dip2b/Rb1/Rtn4/D130043K22Rik/Bcl11a/Map2/Ttc3	14
Inh_DCN	CD_vs_HC	CD up	GO:0099560	synaptic membrane adhesion	7/437	36/28891	9.86799e-07	6.14491e-05	4.7148e-05	Ptprd/Nrg1/Pcdh17/Cdh10/Ntng1/Lrfn5/Slitrk1	7
Inh_DCN	CD_vs_HC	CD up	GO:0050890	cognition	20/437	371/28891	1.17648e-06	7.20396e-05	5.52738e-05	Nrg1/Grm7/Clstn2/Grm5/Cntnap2/Ptchd1/Kalrn/Apoe/Neto1/Brinp1/Pde8b/Foxp2/Prkar1b/Prkar2b/Hmgcr/Oprk1/Scn2a/Ncam1/Slc1a1/Pde4d	20
Inh_DCN	CD_vs_HC	CD up	GO:0099175	regulation of postsynapse organization	12/437	139/28891	1.45697e-06	8.77527e-05	6.733e-05	Ptprd/Tanc2/Camk2b/Kalrn/Apoe/Epha7/Lrp8/Lrfn2/Dgkb/Cask/Dnm3/Kif1a	12
Inh_DCN	CD_vs_HC	CD up	GO:0031644	regulation of nervous system process	13/437	167/28891	1.72695e-06	0.000102336	7.85191e-05	Grik2/Pard3/Neto2/Cntnap2/Trf/Celf4/Neto1/Dlgap2/Htr2c/Prkar1b/Tmem108/Rims1/Rims2	13
Inh_DCN	CD_vs_HC	CD up	GO:0106027	neuron projection organization	11/437	118/28891	1.87601e-06	0.000109404	8.39425e-05	Epha5/Tanc2/Cntnap2/Camk2b/Kalrn/Ephb1/Apoe/Lrp8/Cask/Dnm3/Kif1a	11
Inh_DCN	CD_vs_HC	CD up	GO:0072001	renal system development	19/437	352/28891	2.1334e-06	0.000122471	9.3968e-05	Robo1/Schip1/Robo2/Slit2/Kif26b/Basp1/Epha7/Nrp1/Dlg1/Prickle1/Dchs2/Pcsk5/Kif3a/Pdgfa/C1galt1/Npnt/Asxl1/Cplane1/Cux1	19
Inh_DCN	CD_vs_HC	CD up	GO:0001662	behavioral fear response	8/437	57/28891	2.22047e-06	0.000123615	9.48458e-05	Grm7/Grik2/Apoe/Brinp1/Pde8b/Htr2c/Slc1a1/Gja1	8
Inh_DCN	CD_vs_HC	CD up	GO:0060997	dendritic spine morphogenesis	9/437	76/28891	2.22062e-06	0.000123615	9.48458e-05	Epha5/Tanc2/Camk2b/Kalrn/Ephb1/Lrp8/Cask/Dnm3/Kif1a	9
Inh_DCN	CD_vs_HC	CD up	GO:0099633	protein localization to postsynaptic specialization membrane	7/437	41/28891	2.48995e-06	0.00013453	0.000103221	Gpc6/Neto2/Kalrn/Neto1/Dlg1/Ogt/Dlg2	7
Inh_DCN	CD_vs_HC	CD up	GO:0099645	neurotransmitter receptor localization to postsynaptic specialization membrane	7/437	41/28891	2.48995e-06	0.00013453	0.000103221	Gpc6/Neto2/Kalrn/Neto1/Dlg1/Ogt/Dlg2	7
Inh_DCN	CD_vs_HC	CD up	GO:0002209	behavioral defense response	8/437	58/28891	2.54198e-06	0.000135351	0.000103851	Grm7/Grik2/Apoe/Brinp1/Pde8b/Htr2c/Slc1a1/Gja1	8
Inh_DCN	CD_vs_HC	CD up	GO:0050768	negative regulation of neurogenesis	13/437	175/28891	2.90999e-06	0.000152733	0.000117187	Slit2/Sema6d/Epha7/Nrp1/Brinp1/Pcm1/Dip2b/Rb1/Rtn4/D130043K22Rik/Bcl11a/Map2/Ttc3	13
Inh_DCN	CD_vs_HC	CD up	GO:0019932	second-messenger-mediated signaling	18/437	328/28891	3.13339e-06	0.000162142	0.000124407	Epha5/Nrg1/Chrm3/Grm5/Ncald/Prkg1/Pex5l/Kcnc2/Slc24a4/Apoe/Atp2b4/Htr2c/Dmd/Tenm2/Nfat5/Gucy1a2/Ncam1/Pde4d	18
Inh_DCN	CD_vs_HC	CD up	GO:1990778	protein localization to cell periphery	20/437	400/28891	3.69023e-06	0.000188304	0.00014448	Gpc6/Grip1/Kcnb2/Neto2/Camk2b/Kalrn/Neto1/Dlg1/Atp2b4/Lztfl1/Rapgef6/Cask/Mal/Rhoq/Vti1b/Slc1a1/Ogt/Dlg2/Prkg2/Ank3	20
Inh_DCN	CD_vs_HC	CD up	GO:0051965	positive regulation of synapse assembly	9/437	82/28891	4.21699e-06	0.000212236	0.000162842	Ptprd/Lrrtm3/Lingo2/Clstn2/Adgrl2/Slit2/Lrrtm4/Ephb1/Slitrk1	9
Inh_DCN	CD_vs_HC	CD up	GO:0001822	kidney development	18/437	336/28891	4.38067e-06	0.000217355	0.00016677	Robo1/Schip1/Robo2/Slit2/Kif26b/Basp1/Epha7/Nrp1/Dlg1/Dchs2/Pcsk5/Kif3a/Pdgfa/C1galt1/Npnt/Asxl1/Cplane1/Cux1	18
Inh_DCN	CD_vs_HC	CD up	GO:0048640	negative regulation of developmental growth	11/437	129/28891	4.49618e-06	0.000217355	0.00016677	Slit2/Sema6d/Epha7/Nrp1/Dip2b/Rtn4/D130043K22Rik/Bcl11a/Gja1/Map2/Ttc3	11
Inh_DCN	CD_vs_HC	CD up	GO:1901890	positive regulation of cell junction assembly	11/437	129/28891	4.49618e-06	0.000217355	0.00016677	Ptprd/Lrrtm3/Lingo2/Clstn2/Adgrl2/Slit2/Lrrtm4/Cntnap2/Ephb1/Nrp1/Slitrk1	11
Inh_DCN	CD_vs_HC	CD up	GO:1905475	regulation of protein localization to membrane	14/437	212/28891	4.83527e-06	0.000230712	0.000177018	Gpc6/Grip1/Neto2/Camk2b/Kalrn/Dlg1/Atp2b4/Lztfl1/Rhoq/Vti1b/Slc1a1/Gpc5/Ogt/Ank3	14
Inh_DCN	CD_vs_HC	CD up	GO:0032535	regulation of cellular component size	20/437	411/28891	5.52641e-06	0.000260308	0.000199727	Slit2/Tenm1/Sema6d/Apoe/Epha7/Nrp1/Add2/Dlg1/Hsp90aa1/Arhgap18/Dip2b/Rtn4/Hsp90ab1/Map1b/D130043K22Rik/Bcl11a/Ogt/Map2/Prkg2/Ttc3	20
Inh_DCN	CD_vs_HC	CD up	GO:0016126	sterol biosynthetic process	8/437	65/28891	6.10343e-06	0.000283848	0.000217788	Cyp51/Apoe/Msmo1/Hmgcr/Sqle/Fdft1/Idi1/Fdps	8
Inh_DCN	CD_vs_HC	CD up	GO:0008038	neuron recognition	7/437	47/28891	6.44196e-06	0.000295847	0.000226994	Cntn5/Robo1/Robo2/Cntnap2/Nrp1/Rtn4/Ncam1	7
Inh_DCN	CD_vs_HC	CD up	GO:0097120	receptor localization to synapse	9/437	87/28891	6.90568e-06	0.000313228	0.00024033	Gpc6/Grip1/Cep112/Neto2/Kalrn/Neto1/Dlg1/Ogt/Dlg2	9
Inh_DCN	CD_vs_HC	CD up	GO:0072384	organelle transport along microtubule	9/437	88/28891	7.59074e-06	0.000340038	0.000260901	Fyco1/Bicd1/Agbl4/Ubb/Uchl1/Lamp1/Map1b/Kif1a/Map2	9
Inh_DCN	CD_vs_HC	CD up	GO:1903539	protein localization to postsynaptic membrane	8/437	67/28891	7.68187e-06	0.000340038	0.000260901	Gpc6/Grip1/Neto2/Kalrn/Neto1/Dlg1/Ogt/Dlg2	8
Inh_DCN	CD_vs_HC	CD up	GO:0001558	regulation of cell growth	21/437	459/28891	8.31476e-06	0.000363672	0.000279034	Nrg1/Slit2/Slit3/Sema6d/Apoe/Epha7/Nrp1/Minar1/Dip2b/Rb1/Sesn1/Rtn4/Map1b/D130043K22Rik/Fdps/Bcl11a/Gja1/Map2/Rims1/Rims2/Ttc3	21
Inh_DCN	CD_vs_HC	CD up	GO:0062237	protein localization to postsynapse	8/437	68/28891	8.59218e-06	0.000371384	0.000284952	Gpc6/Grip1/Neto2/Kalrn/Neto1/Dlg1/Ogt/Dlg2	8
Inh_DCN	CD_vs_HC	CD up	GO:0030516	regulation of axon extension	10/437	113/28891	8.7764e-06	0.000374936	0.000287677	Slit2/Sema6d/Apoe/Nrp1/Dip2b/Rtn4/Map1b/D130043K22Rik/Map2/Ttc3	10
Inh_DCN	CD_vs_HC	CD up	GO:0035725	sodium ion transmembrane transport	12/437	169/28891	1.1062e-05	0.000467146	0.000358427	Grip1/Slc24a4/Scn3a/Neto1/Klhl24/Atp2b4/Dmd/Gm13629/Scn2a/Nalcn/Fgf14/Ank3	12
Inh_DCN	CD_vs_HC	CD up	GO:0046578	regulation of Ras protein signal transduction	13/437	199/28891	1.18064e-05	0.000492919	0.000378202	Robo1/Nrg1/Dlc1/Apoe/Mapre2/Nrp1/Arhgef3/Arhgap24/Rtn4/Lztr1/Pik3cb/Rasa3/Ogt	13
Inh_DCN	CD_vs_HC	CD up	GO:0045926	negative regulation of growth	15/437	263/28891	1.3113e-05	0.000541315	0.000415335	Slit2/Slit3/Sema6d/Epha7/Nrp1/Minar1/Dip2b/Rb1/Sesn1/Rtn4/D130043K22Rik/Bcl11a/Gja1/Map2/Ttc3	15
Inh_DCN	CD_vs_HC	CD up	GO:0008089	anterograde axonal transport	7/437	53/28891	1.46036e-05	0.000596153	0.00045741	Neto1/Agbl4/Kif3a/Kif1a/Dlg2/Map2/Ank3	7
Inh_DCN	CD_vs_HC	CD up	GO:0021761	limbic system development	10/437	120/28891	1.49382e-05	0.000603109	0.000462747	Epha5/Cntnap2/Nrp1/Lrp8/Alk/Ubb/Pou3f2/Tmem108/Kif3a/Scn2a	10
Inh_DCN	CD_vs_HC	CD up	GO:0042176	regulation of protein catabolic process	18/437	369/28891	1.56653e-05	0.00062559	0.000479996	Nrg1/Cyp51/Apoe/Cst3/Hsp90aa1/Ubb/Mapk8/Prickle1/Hmgcr/Hsp90ab1/Rnf144b/Sf3b3/Ndfip1/Nell1/Crebrf/Gja1/Ogt/Mycbp2	18
Inh_DCN	CD_vs_HC	CD up	GO:0031290	retinal ganglion cell axon guidance	5/437	22/28891	1.64797e-05	0.000651035	0.000499519	Robo2/Slit2/Ephb1/Epha7/Nrp1	5
Inh_DCN	CD_vs_HC	CD up	GO:0001764	neuron migration	13/437	206/28891	1.70615e-05	0.000666851	0.000511654	Nrg1/Prkg1/Camk2b/Mrtfb/Nrp1/Hsp90aa1/Mapk8/Nrg3/Pcm1/Ntng1/Nexmif/Ctnna2/Gja1	13
Inh_DCN	CD_vs_HC	CD up	GO:0021954	central nervous system neuron development	9/437	98/28891	1.83046e-05	0.000707908	0.000543156	Slit2/Ephb1/Nrp1/Agbl4/Brinp1/Hsp90aa1/Ubb/Hsp90ab1/Mycbp2	9
Inh_DCN	CD_vs_HC	CD up	GO:0099054	presynapse assembly	7/437	55/28891	1.87323e-05	0.000716901	0.000550056	Cntn5/Ptprd/Nrg1/Lrrtm3/Pcdh17/Lrfn5/Slitrk1	7
Inh_DCN	CD_vs_HC	CD up	GO:0007018	microtubule-based movement	20/437	449/28891	1.99688e-05	0.000756344	0.000580319	Kif26b/Neto1/Fyco1/Bicd1/Agbl4/Stard9/Atp2b4/Ubb/Uchl1/Lztfl1/Pcm1/Tmem108/Lamp1/Kif3a/Map1b/Kif1a/Dlg2/Map2/Dst/Ank3	20
Inh_DCN	CD_vs_HC	CD up	GO:0032409	regulation of transporter activity	16/437	307/28891	2.07658e-05	0.000778504	0.000597323	Chrm3/Grip1/Cacna2d1/Grm5/Gsg1l/Kcnc2/Neto1/Ndfip2/Dlg1/Klhl24/Dmd/Ndfip1/Gja1/Fgf14/Pde4d/Ank3	16
Inh_DCN	CD_vs_HC	CD up	GO:0007265	Ras protein signal transduction	17/437	342/28891	2.1161e-05	0.00078531	0.000602544	Robo1/Nrg1/Srgap1/Dlc1/Apoe/Mapre2/Nrp1/Rasgef1b/Arhgef3/Arhgap24/Rapgef5/Rtn4/Rapgef6/Lztr1/Pik3cb/Rasa3/Ogt	17
Inh_DCN	CD_vs_HC	CD up	GO:0031503	protein-containing complex localization	14/437	244/28891	2.37173e-05	0.000871373	0.000668577	Gpc6/Nrg1/Grip1/Cep112/Gsg1l/Neto2/Kalrn/Neto1/Dlg1/Pcm1/Dnm3/Slc1a1/Ogt/Dlg2	14
Inh_DCN	CD_vs_HC	CD up	GO:0008090	retrograde axonal transport	5/437	24/28891	2.59438e-05	0.000943737	0.000724101	Agbl4/Tmem108/Kif1a/Dlg2/Dst	5
Inh_DCN	CD_vs_HC	CD up	GO:2001222	regulation of neuron migration	7/437	58/28891	2.66946e-05	0.000961531	0.000737753	Nrg1/Camk2b/Mapk8/Nrg3/Ntng1/Nexmif/Ctnna2	7
Inh_DCN	CD_vs_HC	CD up	GO:1904375	regulation of protein localization to cell periphery	11/437	156/28891	2.73183e-05	0.00097444	0.000747658	Gpc6/Grip1/Neto2/Camk2b/Kalrn/Dlg1/Atp2b4/Lztfl1/Rhoq/Vti1b/Ogt	11
Inh_DCN	CD_vs_HC	CD up	GO:0021537	telencephalon development	15/437	281/28891	2.84193e-05	0.00100397	0.000770313	Robo1/Epha5/Nrg1/Robo2/Slit2/Lrp8/Foxp2/Alk/Nrg3/Pou3f2/Rtn4/Tmem108/Kif3a/Cdon/Scn2a	15
Inh_DCN	CD_vs_HC	CD up	GO:0006695	cholesterol biosynthetic process	7/437	59/28891	2.98975e-05	0.00102657	0.000787658	Cyp51/Apoe/Msmo1/Hmgcr/Fdft1/Idi1/Fdps	7
Inh_DCN	CD_vs_HC	CD up	GO:0061001	regulation of dendritic spine morphogenesis	7/437	59/28891	2.98975e-05	0.00102657	0.000787658	Tanc2/Camk2b/Kalrn/Lrp8/Cask/Dnm3/Kif1a	7
Inh_DCN	CD_vs_HC	CD up	GO:1902653	secondary alcohol biosynthetic process	7/437	59/28891	2.98975e-05	0.00102657	0.000787658	Cyp51/Apoe/Msmo1/Hmgcr/Fdft1/Idi1/Fdps	7
Inh_DCN	CD_vs_HC	CD up	GO:0019228	neuronal action potential	7/437	60/28891	3.34097e-05	0.00113655	0.000872039	Grik2/Kcnmb2/Cntnap2/Kcnd2/Scn3a/Scn2a/Ank3	7
Inh_DCN	CD_vs_HC	CD up	GO:0048639	positive regulation of developmental growth	13/437	221/28891	3.5644e-05	0.00120143	0.000921823	Nrg1/Cacna2d2/Apoe/Nrp1/Dlg1/Pou3f2/Atp8a2/Map1b/Fdps/Bcl11a/Ncam1/Rims1/Rims2	13
Inh_DCN	CD_vs_HC	CD up	GO:1902414	protein localization to cell junction	10/437	133/28891	3.64947e-05	0.00121892	0.000935242	Gpc6/Grip1/Neto2/Kalrn/Neto1/Dlg1/Mapk8/Kif3a/Ogt/Dlg2	10
Inh_DCN	CD_vs_HC	CD up	GO:0040013	negative regulation of locomotion	17/437	358/28891	3.76447e-05	0.00124601	0.000956022	Robo1/Nav3/Nrg1/Robo2/Srgap1/Slit2/Prkg1/Dlc1/Sema6d/Apoe/Apod/Nrp1/Atp2b4/Nrg3/Nexmif/Krit1/Ogt	17
Inh_DCN	CD_vs_HC	CD up	GO:0007612	learning	12/437	192/28891	3.93455e-05	0.00129067	0.000990295	Grm7/Clstn2/Grm5/Cntnap2/Kalrn/Neto1/Pde8b/Foxp2/Prkar2b/Hmgcr/Oprk1/Slc1a1	12
Inh_DCN	CD_vs_HC	CD up	GO:0009266	response to temperature stimulus	11/437	164/28891	4.32952e-05	0.00140767	0.00108006	Grik2/Xylt1/Arpp21/Cntnap2/Ano3/Ephb1/Hsp90aa1/Pcsk1n/Hsp90ab1/Cdh8/Rasa3	11
Inh_DCN	CD_vs_HC	CD up	GO:0032253	dense core granule localization	4/437	14/28891	4.58291e-05	0.00144557	0.00110914	Tanc2/Mapk8/Kif1a/Map2	4
Inh_DCN	CD_vs_HC	CD up	GO:1901950	dense core granule transport	4/437	14/28891	4.58291e-05	0.00144557	0.00110914	Tanc2/Mapk8/Kif1a/Map2	4
Inh_DCN	CD_vs_HC	CD up	GO:0098815	modulation of excitatory postsynaptic potential	7/437	63/28891	4.60348e-05	0.00144557	0.00110914	Grik2/Celf4/Neto1/Prkar1b/Tmem108/Rims1/Rims2	7
Inh_DCN	CD_vs_HC	CD up	GO:0099172	presynapse organization	7/437	63/28891	4.60348e-05	0.00144557	0.00110914	Cntn5/Ptprd/Nrg1/Lrrtm3/Pcdh17/Lrfn5/Slitrk1	7
Inh_DCN	CD_vs_HC	CD up	GO:0003007	heart morphogenesis	15/437	294/28891	4.77023e-05	0.00148524	0.00113958	Robo1/Nrg1/Robo2/Slit2/Col11a1/Dlc1/Slit3/Mrtfb/Nrp1/Prickle1/Rtn4/Gaa/Kif3a/Asxl1/Gja1	15
Inh_DCN	CD_vs_HC	CD up	GO:0008016	regulation of heart contraction	12/437	197/28891	5.05216e-05	0.0015598	0.00119679	Chrm3/Ctnna3/Cacna2d1/Kcnd2/Dlg1/Atp2b4/Dmd/Gaa/Slc1a1/Tmem65/Gja1/Pde4d	12
Inh_DCN	CD_vs_HC	CD up	GO:0050775	positive regulation of dendrite morphogenesis	7/437	64/28891	5.10222e-05	0.00156213	0.00119857	Ptprd/Grip1/Camk2b/Kalrn/Lrp8/Cask/Cux1	7
Inh_DCN	CD_vs_HC	CD up	GO:0006814	sodium ion transport	14/437	262/28891	5.16285e-05	0.00156763	0.00120279	Nkain3/Grip1/Slc24a4/Scn3a/Neto1/Klhl24/Atp2b4/Dmd/Slc38a2/Gm13629/Scn2a/Nalcn/Fgf14/Ank3	14
Inh_DCN	CD_vs_HC	CD up	GO:0008344	adult locomotory behavior	9/437	112/28891	5.30749e-05	0.00159834	0.00122636	Pcdh15/Klhl1/Kalrn/Sez6l/Npc1/Pbx3/Uchl1/Prex2/Fgf14	9
Inh_DCN	CD_vs_HC	CD up	GO:0035264	multicellular organism growth	13/437	230/28891	5.377e-05	0.00160611	0.00123232	Pcdh15/Cacna2d2/Cntnap2/Rasal2/Dlg1/Dmd/Prickle1/Pou3f2/Atp8a2/Slitrk1/Wdr48/Meg3/Pde4d	13
Inh_DCN	CD_vs_HC	CD up	GO:0030010	establishment of cell polarity	11/437	170/28891	6.0039e-05	0.0017789	0.00136489	Pard3/Kif26b/Pard3b/Ephb1/Hsp90aa1/Prickle1/Krit1/Hsp90ab1/Map1b/Gja1/Map2	11
Inh_DCN	CD_vs_HC	CD up	GO:0010544	negative regulation of platelet activation	4/437	15/28891	6.17485e-05	0.00181491	0.00139253	Prkg1/Apoe/Pdgfa/Cd9	4
Inh_DCN	CD_vs_HC	CD up	GO:1903522	regulation of blood circulation	14/437	268/28891	6.58552e-05	0.00192025	0.00147335	Chrm3/Ctnna3/Cacna2d1/Kcnd2/Dlg1/Atp2b4/Htr2c/Dmd/Hmgcr/Gaa/Slc1a1/Tmem65/Gja1/Pde4d	14
Inh_DCN	CD_vs_HC	CD up	GO:0003180	aortic valve morphogenesis	5/437	29/28891	6.81113e-05	0.00195501	0.00150002	Robo1/Robo2/Slit2/Slit3/Rb1	5
Inh_DCN	CD_vs_HC	CD up	GO:1902473	regulation of protein localization to synapse	5/437	29/28891	6.81113e-05	0.00195501	0.00150002	Gpc6/Neto2/Kalrn/Dlg1/Ogt	5
Inh_DCN	CD_vs_HC	CD up	GO:0010770	positive regulation of cell morphogenesis	7/437	67/28891	6.87021e-05	0.00195668	0.0015013	Ptprd/Grip1/Camk2b/Kalrn/Lrp8/Cask/Cux1	7
Inh_DCN	CD_vs_HC	CD up	GO:0043266	regulation of potassium ion transport	9/437	116/28891	6.98377e-05	0.00197372	0.00151438	Grip1/Kcnip1/Kcnc2/Neto1/Dlg1/Klhl24/Oprk1/Plcb4/Ank3	9
Inh_DCN	CD_vs_HC	CD up	GO:0050905	neuromuscular process	12/437	204/28891	7.07255e-05	0.00198355	0.00152192	Pcdh15/Cntnap2/Camk2b/Pde8b/Kcnh1/Uchl1/Dmd/Gaa/Ctnna2/Atp8a2/Fgf14/Mycbp2	12
Inh_DCN	CD_vs_HC	CD up	GO:0099003	vesicle-mediated transport in synapse	14/437	270/28891	7.13029e-05	0.0019846	0.00152272	Nrg1/Grip1/Pcdh17/Gsg1l/Stxbp5l/Kcnh1/Prkar1b/Cask/Syt6/Dnm3/Dnajc6/Fgf14/Rims1/Rims2	14
Inh_DCN	CD_vs_HC	CD up	GO:0042177	negative regulation of protein catabolic process	9/437	117/28891	7.46617e-05	0.00206246	0.00158246	Nrg1/Cyp51/Cst3/Hmgcr/Hsp90ab1/Sf3b3/Nell1/Ogt/Mycbp2	9
Inh_DCN	CD_vs_HC	CD up	GO:0022029	telencephalon cell migration	7/437	68/28891	7.56e-05	0.0020669	0.00158587	Robo1/Nrg1/Slit2/Lrp8/Nrg3/Pou3f2/Rtn4	7
Inh_DCN	CD_vs_HC	CD up	GO:2001257	regulation of cation channel activity	10/437	145/28891	7.59475e-05	0.0020669	0.00158587	Grip1/Cacna2d1/Kcnc2/Neto1/Dlg1/Klhl24/Dmd/Fgf14/Pde4d/Ank3	10
Inh_DCN	CD_vs_HC	CD up	GO:0060004	reflex	5/437	30/28891	8.07233e-05	0.00216578	0.00166173	Pcdh15/Foxp2/Npnt/Slc1a1/Gja1	5
Inh_DCN	CD_vs_HC	CD up	GO:0098840	protein transport along microtubule	4/437	16/28891	8.13493e-05	0.00216578	0.00166173	Neto1/Kif3a/Kif1a/Dlg2	4
Inh_DCN	CD_vs_HC	CD up	GO:0099118	microtubule-based protein transport	4/437	16/28891	8.13493e-05	0.00216578	0.00166173	Neto1/Kif3a/Kif1a/Dlg2	4
Inh_DCN	CD_vs_HC	CD up	GO:0032386	regulation of intracellular transport	16/437	346/28891	8.63482e-05	0.00228233	0.00175116	Apod/Ube2j1/Hsp90aa1/Mapk8/Camk1/Pcm1/Lamp1/Hsp90ab1/Kif3a/Map1b/Gcc2/Slc1a1/Crebrf/Ogt/Map2/Ank3	16
Inh_DCN	CD_vs_HC	CD up	GO:0010959	regulation of metal ion transport	19/437	461/28891	9.00426e-05	0.00236297	0.00181304	Nkain3/Grip1/Cacna2d1/Kcnip1/Kcnc2/Trf/Neto1/Plp1/Dlg1/Klhl24/Atp2b4/Dmd/Cask/Oprk1/Plcb4/Gja1/Fgf14/Pde4d/Ank3	19
Inh_DCN	CD_vs_HC	CD up	GO:0007215	glutamate receptor signaling pathway	6/437	49/28891	9.33423e-05	0.00243219	0.00186615	Grm7/Grip1/Grm5/Kalrn/Plp1/Slc1a1	6
Inh_DCN	CD_vs_HC	CD up	GO:0030336	negative regulation of cell migration	15/437	313/28891	9.6297e-05	0.00249151	0.00191166	Robo1/Nav3/Nrg1/Srgap1/Slit2/Prkg1/Dlc1/Sema6d/Apoe/Apod/Atp2b4/Nrg3/Nexmif/Krit1/Ogt	15
Inh_DCN	CD_vs_HC	CD up	GO:0060079	excitatory postsynaptic potential	8/437	95/28891	9.90791e-05	0.0025103	0.00192608	Grik2/Cntnap2/Celf4/Neto1/Prkar1b/Tmem108/Rims1/Rims2	8
Inh_DCN	CD_vs_HC	CD up	GO:1901379	regulation of potassium ion transmembrane transport	8/437	95/28891	9.90791e-05	0.0025103	0.00192608	Grip1/Kcnip1/Kcnc2/Neto1/Dlg1/Klhl24/Oprk1/Ank3	8
Inh_DCN	CD_vs_HC	CD up	GO:0021885	forebrain cell migration	7/437	71/28891	9.97561e-05	0.0025103	0.00192608	Robo1/Nrg1/Slit2/Lrp8/Nrg3/Pou3f2/Rtn4	7
Inh_DCN	CD_vs_HC	CD up	GO:1902305	regulation of sodium ion transmembrane transport	7/437	71/28891	9.97561e-05	0.0025103	0.00192608	Grip1/Neto1/Klhl24/Atp2b4/Dmd/Fgf14/Ank3	7
Inh_DCN	CD_vs_HC	CD up	GO:0021953	central nervous system neuron differentiation	12/437	212/28891	0.000102013	0.00254963	0.00195625	Slit2/Chd5/Ephb1/Nrp1/Agbl4/Brinp1/Hsp90aa1/Foxp2/Ubb/Tox/Hsp90ab1/Mycbp2	12
Inh_DCN	CD_vs_HC	CD up	GO:0042711	maternal behavior	4/437	17/28891	0.000105112	0.00260932	0.00200205	Kalrn/Brinp1/Oprk1/Crebrf	4
Inh_DCN	CD_vs_HC	CD up	GO:0051224	negative regulation of protein transport	10/437	151/28891	0.000106518	0.0026265	0.00201523	Cyp51/Apoe/Apod/Ube2j1/Ndfip2/Pde8b/Stxbp5l/Hmgcr/Ndfip1/Ogt	10
Inh_DCN	CD_vs_HC	CD up	GO:0021543	pallium development	11/437	182/28891	0.000110646	0.00271009	0.00207937	Robo1/Epha5/Slit2/Lrp8/Alk/Pou3f2/Rtn4/Tmem108/Kif3a/Cdon/Scn2a	11
Inh_DCN	CD_vs_HC	CD up	GO:0010038	response to metal ion	15/437	320/28891	0.000122893	0.00299014	0.00229424	Pcdh15/Kcnmb2/Camk2b/Trf/Glud1/Slc25a13/Npc1/Kcnh1/Mapk8/Syt6/Ncam1/Slc1a1/Glra3/Dlg2/Ank3	15
Inh_DCN	CD_vs_HC	CD up	GO:0008045	motor neuron axon guidance	5/437	33/28891	0.00012952	0.00313063	0.00240204	Slit2/Alcam/Nrp1/Chn1/Mycbp2	5
Inh_DCN	CD_vs_HC	CD up	GO:1904950	negative regulation of establishment of protein localization	10/437	155/28891	0.000132217	0.00314488	0.00241297	Cyp51/Apoe/Apod/Ube2j1/Ndfip2/Pde8b/Stxbp5l/Hmgcr/Ndfip1/Ogt	10
Inh_DCN	CD_vs_HC	CD up	GO:0048814	regulation of dendrite morphogenesis	8/437	99/28891	0.000132422	0.00314488	0.00241297	Robo1/Ptprd/Grip1/Camk2b/Kalrn/Lrp8/Cask/Cux1	8
Inh_DCN	CD_vs_HC	CD up	GO:0017014	protein nitrosylation	4/437	18/28891	0.000133533	0.00314488	0.00241297	Atp2b4/Ncoa7/Dmd/Ddah1	4
Inh_DCN	CD_vs_HC	CD up	GO:0060746	parental behavior	4/437	18/28891	0.000133533	0.00314488	0.00241297	Kalrn/Brinp1/Oprk1/Crebrf	4
Inh_DCN	CD_vs_HC	CD up	GO:0035418	protein localization to synapse	8/437	100/28891	0.000142063	0.00332445	0.00255075	Gpc6/Grip1/Neto2/Kalrn/Neto1/Dlg1/Ogt/Dlg2	8
Inh_DCN	CD_vs_HC	CD up	GO:0090659	walking behavior	6/437	53/28891	0.000145637	0.00338652	0.00259837	Pcdh15/Klhl1/Cntnap2/Npc1/Uchl1/Dmd	6
Inh_DCN	CD_vs_HC	CD up	GO:0003176	aortic valve development	5/437	34/28891	0.000149977	0.00345737	0.00265274	Robo1/Robo2/Slit2/Slit3/Rb1	5
Inh_DCN	CD_vs_HC	CD up	GO:2000146	negative regulation of cell motility	15/437	326/28891	0.000150566	0.00345737	0.00265274	Robo1/Nav3/Nrg1/Srgap1/Slit2/Prkg1/Dlc1/Sema6d/Apoe/Apod/Atp2b4/Nrg3/Nexmif/Krit1/Ogt	15
Inh_DCN	CD_vs_HC	CD up	GO:0002028	regulation of sodium ion transport	8/437	102/28891	0.000163085	0.0036986	0.00283783	Nkain3/Grip1/Neto1/Klhl24/Atp2b4/Dmd/Fgf14/Ank3	8
Inh_DCN	CD_vs_HC	CD up	GO:0019935	cyclic-nucleotide-mediated signaling	8/437	102/28891	0.000163085	0.0036986	0.00283783	Epha5/Prkg1/Pex5l/Kcnc2/Apoe/Htr2c/Gucy1a2/Pde4d	8
Inh_DCN	CD_vs_HC	CD up	GO:0098696	regulation of neurotransmitter receptor localization to postsynaptic specialization membrane	4/437	19/28891	0.000167127	0.00373121	0.00286285	Gpc6/Neto2/Kalrn/Ogt	4
Inh_DCN	CD_vs_HC	CD up	GO:1902430	negative regulation of amyloid-beta formation	4/437	19/28891	0.000167127	0.00373121	0.00286285	Apoe/Rtn4/Rtn1/Rtn3	4
Inh_DCN	CD_vs_HC	CD up	GO:0060078	regulation of postsynaptic membrane potential	9/437	130/28891	0.000167569	0.00373121	0.00286285	Grik2/Cntnap2/Celf4/Neto1/Prkar1b/Tmem108/Fgf14/Rims1/Rims2	9
Inh_DCN	CD_vs_HC	CD up	GO:0008037	cell recognition	10/437	160/28891	0.000171527	0.00379632	0.0029128	Cntn5/Robo1/Robo2/Cntnap2/Ephb1/Nrp1/Dlg1/Rtn4/Cd9/Ncam1	10
Inh_DCN	CD_vs_HC	CD up	GO:0022898	regulation of transmembrane transporter activity	14/437	294/28891	0.00017439	0.00381654	0.00292832	Chrm3/Grip1/Cacna2d1/Grm5/Gsg1l/Kcnc2/Neto1/Dlg1/Klhl24/Dmd/Gja1/Fgf14/Pde4d/Ank3	14
Inh_DCN	CD_vs_HC	CD up	GO:0019226	transmission of nerve impulse	8/437	103/28891	0.000174518	0.00381654	0.00292832	Grm7/Grik2/Kcnmb2/Cntnap2/Kcnd2/Scn3a/Scn2a/Ank3	8
Inh_DCN	CD_vs_HC	CD up	GO:0051656	establishment of organelle localization	19/437	491/28891	0.000202161	0.0043949	0.00337207	Ptgds/Pard3/Tanc2/Pard3b/Fyco1/Bicd1/Agbl4/Dlg1/Ubb/Uchl1/Mapk8/Pcm1/Rb1/Lamp1/Map1b/Dnm3/Ahi1/Kif1a/Map2	19
Inh_DCN	CD_vs_HC	CD up	GO:0051235	maintenance of location	16/437	373/28891	0.000203868	0.00440595	0.00338055	Nrg1/Pex5l/Apoe/Htr2c/Npc1/Dmd/Sqle/Gaa/Fth1/Vstm2a/Plcb4/Asxl1/Ryr3/Gja1/Pde4d/Ank3	16
Inh_DCN	CD_vs_HC	CD up	GO:0032252	secretory granule localization	4/437	20/28891	0.000206422	0.00443506	0.00340289	Tanc2/Mapk8/Kif1a/Map2	4
Inh_DCN	CD_vs_HC	CD up	GO:0007613	memory	10/437	164/28891	0.000209666	0.00447856	0.00343626	Nrg1/Grm7/Ptchd1/Kalrn/Apoe/Neto1/Brinp1/Scn2a/Slc1a1/Pde4d	10
Inh_DCN	CD_vs_HC	CD up	GO:0051057	positive regulation of small GTPase mediated signal transduction	7/437	80/28891	0.000212101	0.00450439	0.00345608	Robo1/Nrg1/Mapre2/Arhgef3/Rtn4/Pik3cb/Cdon	7
Inh_DCN	CD_vs_HC	CD up	GO:0000381	regulation of alternative mRNA splicing, via spliceosome	6/437	57/28891	0.000218792	0.00461979	0.00354462	Khdrbs2/Khdrbs3/Celf4/Nova1/Celf2/Rbm5	6
Inh_DCN	CD_vs_HC	CD up	GO:0019934	cGMP-mediated signaling	5/437	37/28891	0.000226357	0.0047252	0.0036255	Prkg1/Kcnc2/Apoe/Htr2c/Gucy1a2	5
Inh_DCN	CD_vs_HC	CD up	GO:0048169	regulation of long-term neuronal synaptic plasticity	5/437	37/28891	0.000226357	0.0047252	0.0036255	Grik2/Grm5/Camk2b/Neto1/Rims1	5
Inh_DCN	CD_vs_HC	CD up	GO:0048013	ephrin receptor signaling pathway	5/437	38/28891	0.000257441	0.00534371	0.00410007	Epha5/Ephb1/Epha7/Chn1/Epha6	5
Inh_DCN	CD_vs_HC	CD up	GO:0071900	regulation of protein serine/threonine kinase activity	15/437	343/28891	0.000260283	0.00537236	0.00412204	Robo1/Tenm1/Apoe/Atp2b4/Magi3/Uchl1/Prkar1b/Prkar2b/Camk1/Rb1/Pik3cb/Hmgcr/Hsp90ab1/Pdgfa/Fgf18	15
Inh_DCN	CD_vs_HC	CD up	GO:2000649	regulation of sodium ion transmembrane transporter activity	6/437	59/28891	0.000264851	0.00543133	0.00416729	Grip1/Neto1/Klhl24/Dmd/Fgf14/Ank3	6
Inh_DCN	CD_vs_HC	CD up	GO:0007517	muscle organ development	16/437	382/28891	0.000266097	0.00543133	0.00416729	Zfhx3/Nrg1/Cntnap2/Col11a1/Ephb1/Mrtfb/Hdac9/Foxp2/Col19a1/Dmd/Rb1/Hmgcr/Cdon/Gja1/Frg1/Meg3	16
Inh_DCN	CD_vs_HC	CD up	GO:0010469	regulation of signaling receptor activity	9/437	139/28891	0.000276896	0.00562054	0.00431247	Grip1/Gsg1l/Neto2/Slc24a4/Neto1/Dlgap2/Bicd1/Klhl24/Pde4d	9
Inh_DCN	CD_vs_HC	CD up	GO:0086001	cardiac muscle cell action potential	6/437	60/28891	0.000290567	0.00585554	0.00449278	Ctnna3/Cacna2d1/Kcnd2/Dlg1/Dmd/Ank3	6
Inh_DCN	CD_vs_HC	CD up	GO:1902003	regulation of amyloid-beta formation	5/437	39/28891	0.000291662	0.00585554	0.00449278	Lrrtm3/Apoe/Rtn4/Rtn1/Rtn3	5
Inh_DCN	CD_vs_HC	CD up	GO:0033674	positive regulation of kinase activity	17/437	426/28891	0.000303508	0.00604298	0.00463659	Robo1/Epha5/Nrg1/Grm5/Tenm1/Lrp8/Dlg1/Atp2b4/Magi3/Gprc5b/Hsp90aa1/Alk/Camk1/Hsp90ab1/Pdgfa/Fgf18/Slc1a1	17
Inh_DCN	CD_vs_HC	CD up	GO:1902992	negative regulation of amyloid precursor protein catabolic process	4/437	22/28891	0.000304287	0.00604298	0.00463659	Apoe/Rtn4/Rtn1/Rtn3	4
Inh_DCN	CD_vs_HC	CD up	GO:0060047	heart contraction	12/437	239/28891	0.000309882	0.006121	0.00469645	Chrm3/Ctnna3/Cacna2d1/Kcnd2/Dlg1/Atp2b4/Dmd/Gaa/Slc1a1/Tmem65/Gja1/Pde4d	12
Inh_DCN	CD_vs_HC	CD up	GO:0032271	regulation of protein polymerization	11/437	206/28891	0.000324965	0.00638461	0.00489872	Nav3/Slit2/Tenm1/Add2/Dlg1/Hsp90aa1/Stmn2/Mapk8/Arhgap18/Map1b/Map2	11
Inh_DCN	CD_vs_HC	CD up	GO:1905314	semi-lunar valve development	5/437	40/28891	0.000329222	0.00643385	0.00493649	Robo1/Robo2/Slit2/Slit3/Rb1	5
Inh_DCN	CD_vs_HC	CD up	GO:0042886	amide transport	17/437	432/28891	0.000356263	0.00692545	0.00531368	Epha5/Chrm3/Grm7/Pex5l/Kalrn/Glud1/Pde8b/Htr2c/Slc25a13/Stxbp5l/Slc38a2/Hmgcr/Cask/Glul/Slc1a1/Gja1/Rims2	17
Inh_DCN	CD_vs_HC	CD up	GO:1902903	regulation of supramolecular fiber organization	16/437	393/28891	0.000363949	0.00703762	0.00539975	Nav3/Slit2/Dlc1/Tenm1/Apoe/Nrp1/Add2/Dlg1/Stmn2/Mapk8/Arhgap18/Rb1/Ctnna2/Map1b/Gja1/Map2	16
Inh_DCN	CD_vs_HC	CD up	GO:1903828	negative regulation of protein localization	12/437	244/28891	0.00037361	0.00718662	0.00551407	Cyp51/Apoe/Apod/Ube2j1/Ndfip2/Pde8b/Stxbp5l/Lztfl1/Hmgcr/Rhoq/Ndfip1/Ogt	12
Inh_DCN	CD_vs_HC	CD up	GO:0070099	regulation of chemokine-mediated signaling pathway	3/437	10/28891	0.000381086	0.00729225	0.00559512	Robo1/Slit2/Slit3	3
Inh_DCN	CD_vs_HC	CD up	GO:0010594	regulation of endothelial cell migration	10/437	177/28891	0.000386172	0.00735128	0.00564041	Slit2/Apoe/Nrp1/Atp2b4/Hdac9/Ccbe1/Pik3cb/Krit1/Glul/Fgf18	10
Inh_DCN	CD_vs_HC	CD up	GO:0043254	regulation of protein-containing complex assembly	17/437	437/28891	0.000406114	0.00769104	0.0059011	Nav3/Nrg1/Slit2/Stxbp6/Tenm1/Apoe/Add2/Dlg1/Hsp90aa1/Stmn2/Mapk8/Arhgap18/Pcsk5/Map1b/Ncam1/Map2/Rims1	17
Inh_DCN	CD_vs_HC	CD up	GO:0032412	regulation of monoatomic ion transmembrane transporter activity	13/437	283/28891	0.000415179	0.0078128	0.00599452	Chrm3/Grip1/Cacna2d1/Grm5/Gsg1l/Kcnc2/Neto1/Dlg1/Klhl24/Dmd/Fgf14/Pde4d/Ank3	13
Inh_DCN	CD_vs_HC	CD up	GO:0099565	chemical synaptic transmission, postsynaptic	8/437	117/28891	0.000416796	0.0078128	0.00599452	Grik2/Cntnap2/Celf4/Neto1/Prkar1b/Tmem108/Rims1/Rims2	8
Inh_DCN	CD_vs_HC	CD up	GO:0031396	regulation of protein ubiquitination	11/437	213/28891	0.000431254	0.0080081	0.00614437	Ndfip2/Minar1/Hsp90aa1/Ubb/Mapk8/Prickle1/Tcf25/Wdr48/Ndfip1/Ogt/Mycbp2	11
Inh_DCN	CD_vs_HC	CD up	GO:0016202	regulation of striated muscle tissue development	4/437	24/28891	0.000431575	0.0080081	0.00614437	Mrtfb/Hdac9/Cdon/Gja1	4
Inh_DCN	CD_vs_HC	CD up	GO:0019722	calcium-mediated signaling	11/437	214/28891	0.000448582	0.00825979	0.00633748	Nrg1/Chrm3/Grm5/Ncald/Slc24a4/Atp2b4/Htr2c/Dmd/Tenm2/Nfat5/Ncam1	11
Inh_DCN	CD_vs_HC	CD up	GO:0010721	negative regulation of cell development	14/437	323/28891	0.000451883	0.00825979	0.00633748	Bmyc/Slit2/Sema6d/Epha7/Nrp1/Brinp1/Pcm1/Dip2b/Rb1/Rtn4/D130043K22Rik/Bcl11a/Map2/Ttc3	14
Inh_DCN	CD_vs_HC	CD up	GO:0090287	regulation of cellular response to growth factor stimulus	14/437	323/28891	0.000451883	0.00825979	0.00633748	Robo1/Slit2/Nrp1/Fstl5/Atp2b4/Ccbe1/Pmepa1/Dmd/Pik3cb/Tmem108/Cask/Fgf18/Npnt/Ogt	14
Inh_DCN	CD_vs_HC	CD up	GO:0010632	regulation of epithelial cell migration	12/437	250/28891	0.000464395	0.00843268	0.00647013	Slit2/Apoe/Mapre2/Nrp1/Atp2b4/Hdac9/Ccbe1/Rtn4/Pik3cb/Krit1/Glul/Fgf18	12
Inh_DCN	CD_vs_HC	CD up	GO:0045927	positive regulation of growth	14/437	324/28891	0.000465932	0.00843268	0.00647013	Nrg1/Cacna2d2/Apoe/Nrp1/Dlg1/Pou3f2/Atp8a2/Map1b/Fdps/Bcl11a/Ahi1/Ncam1/Rims1/Rims2	14
Inh_DCN	CD_vs_HC	CD up	GO:0008203	cholesterol metabolic process	9/437	150/28891	0.000484796	0.00873107	0.00669908	Cyp51/Apoe/Npc1/Msmo1/Hmgcr/Sqle/Fdft1/Idi1/Fdps	9
Inh_DCN	CD_vs_HC	CD up	GO:0060999	positive regulation of dendritic spine development	6/437	66/28891	0.000488699	0.00875844	0.00672009	Camk2b/Kalrn/Apoe/Lrp8/Camk1/Cask	6
Inh_DCN	CD_vs_HC	CD up	GO:0003015	heart process	12/437	252/28891	0.000498513	0.00883986	0.00678256	Chrm3/Ctnna3/Cacna2d1/Kcnd2/Dlg1/Atp2b4/Dmd/Gaa/Slc1a1/Tmem65/Gja1/Pde4d	12
Inh_DCN	CD_vs_HC	CD up	GO:0098656	monoatomic anion transmembrane transport	7/437	92/28891	0.000501004	0.00883986	0.00678256	Grm5/Gabrb1/Ano3/Ano4/Ano5/Slc1a1/Glra3	7
Inh_DCN	CD_vs_HC	CD up	GO:0034453	microtubule anchoring	4/437	25/28891	0.000507679	0.00883986	0.00678256	Bicd1/Pcm1/Kif3a/Gcc2	4
Inh_DCN	CD_vs_HC	CD up	GO:0034643	establishment of mitochondrion localization, microtubule-mediated	4/437	25/28891	0.000507679	0.00883986	0.00678256	Agbl4/Ubb/Uchl1/Map1b	4
Inh_DCN	CD_vs_HC	CD up	GO:0047497	mitochondrion transport along microtubule	4/437	25/28891	0.000507679	0.00883986	0.00678256	Agbl4/Ubb/Uchl1/Map1b	4
Inh_DCN	CD_vs_HC	CD up	GO:1902547	regulation of cellular response to vascular endothelial growth factor stimulus	4/437	25/28891	0.000507679	0.00883986	0.00678256	Robo1/Atp2b4/Ccbe1/Pik3cb	4
Inh_DCN	CD_vs_HC	CD up	GO:0099612	protein localization to axon	3/437	11/28891	0.00051812	0.00889159	0.00682224	Cntnap2/Mal/Ank3	3
Inh_DCN	CD_vs_HC	CD up	GO:0099640	axo-dendritic protein transport	3/437	11/28891	0.00051812	0.00889159	0.00682224	Neto1/Kif3a/Dlg2	3
Inh_DCN	CD_vs_HC	CD up	GO:2001223	negative regulation of neuron migration	3/437	11/28891	0.00051812	0.00889159	0.00682224	Nrg1/Nrg3/Nexmif	3
Inh_DCN	CD_vs_HC	CD up	GO:0071456	cellular response to hypoxia	8/437	121/28891	0.000521948	0.00889159	0.00682224	Bmyc/Kcnd2/Rtn4/Pik3cb/Cpeb1/Ddah1/Scn2a/Ogt	8
Inh_DCN	CD_vs_HC	CD up	GO:0010631	epithelial cell migration	14/437	328/28891	0.000525913	0.00889159	0.00682224	Robo1/Slit2/Apoe/Mapre2/Nrp1/Atp2b4/Hdac9/Ccbe1/Rtn4/Pik3cb/Krit1/Glul/Fgf18/Pkn2	14
Inh_DCN	CD_vs_HC	CD up	GO:0070371	ERK1 and ERK2 cascade	15/437	367/28891	0.000528651	0.00889159	0.00682224	Nrg1/Bmyc/Cntnap2/Trf/Ephb1/Apoe/Epha7/Nrp1/Dlg1/Htr2c/Dmd/Hmgcr/Pdgfa/Fgf18/Npnt	15
Inh_DCN	CD_vs_HC	CD up	GO:1901016	regulation of potassium ion transmembrane transporter activity	6/437	67/28891	0.00053001	0.00889159	0.00682224	Grip1/Kcnc2/Neto1/Dlg1/Klhl24/Ank3	6
Inh_DCN	CD_vs_HC	CD up	GO:1902476	chloride transmembrane transport	6/437	67/28891	0.00053001	0.00889159	0.00682224	Gabrb1/Ano3/Ano4/Ano5/Slc1a1/Glra3	6
Inh_DCN	CD_vs_HC	CD up	GO:0090132	epithelium migration	14/437	330/28891	0.000558287	0.00929408	0.00713106	Robo1/Slit2/Apoe/Mapre2/Nrp1/Atp2b4/Hdac9/Ccbe1/Rtn4/Pik3cb/Krit1/Glul/Fgf18/Pkn2	14
Inh_DCN	CD_vs_HC	CD up	GO:0045860	positive regulation of protein kinase activity	15/437	369/28891	0.000559061	0.00929408	0.00713106	Robo1/Nrg1/Grm5/Tenm1/Lrp8/Dlg1/Atp2b4/Magi3/Gprc5b/Hsp90aa1/Camk1/Hsp90ab1/Pdgfa/Fgf18/Slc1a1	15
Inh_DCN	CD_vs_HC	CD up	GO:1903035	negative regulation of response to wounding	7/437	94/28891	0.000570484	0.00939073	0.00720522	Xylt1/Prkg1/Apoe/Pdgfa/Cask/D130043K22Rik/Cd9	7
Inh_DCN	CD_vs_HC	CD up	GO:0099601	regulation of neurotransmitter receptor activity	6/437	68/28891	0.000573986	0.00939073	0.00720522	Grip1/Gsg1l/Neto2/Neto1/Dlgap2/Klhl24	6
Inh_DCN	CD_vs_HC	CD up	GO:0021955	central nervous system neuron axonogenesis	5/437	45/28891	0.000574599	0.00939073	0.00720522	Slit2/Ephb1/Hsp90aa1/Hsp90ab1/Mycbp2	5
Inh_DCN	CD_vs_HC	CD up	GO:0018105	peptidyl-serine phosphorylation	14/437	331/28891	0.000575099	0.00939073	0.00720522	Camk2b/Tenm1/Atp2b4/Hsp90aa1/Mapk8/Camk1/Mast4/Dmd/Hsp90ab1/Slc1a1/Ogt/Prkg2/Pkn2/Pde4d	14
Inh_DCN	CD_vs_HC	CD up	GO:0008306	associative learning	8/437	123/28891	0.000582045	0.00946209	0.00725997	Grm7/Clstn2/Cntnap2/Neto1/Pde8b/Hmgcr/Oprk1/Slc1a1	8
Inh_DCN	CD_vs_HC	CD up	GO:0090130	tissue migration	14/437	332/28891	0.00059234	0.00958703	0.00735583	Robo1/Slit2/Apoe/Mapre2/Nrp1/Atp2b4/Hdac9/Ccbe1/Rtn4/Pik3cb/Krit1/Glul/Fgf18/Pkn2	14
Inh_DCN	CD_vs_HC	CD up	GO:1902991	regulation of amyloid precursor protein catabolic process	5/437	46/28891	0.00063675	0.0102606	0.00787265	Lrrtm3/Apoe/Rtn4/Rtn1/Rtn3	5
Inh_DCN	CD_vs_HC	CD up	GO:0061351	neural precursor cell proliferation	11/437	225/28891	0.000680894	0.0107136	0.0082202	Cntnap2/Trf/Ephb1/Eml1/Mapk8/Pcm1/Tox/Pou3f2/Kif3a/Cdon/Kif1a	11
Inh_DCN	CD_vs_HC	CD up	GO:0010649	regulation of cell communication by electrical coupling	3/437	12/28891	0.000683089	0.0107136	0.0082202	Gja1/Pde4d/Ank3	3
Inh_DCN	CD_vs_HC	CD up	GO:0060013	righting reflex	3/437	12/28891	0.000683089	0.0107136	0.0082202	Pcdh15/Foxp2/Slc1a1	3
Inh_DCN	CD_vs_HC	CD up	GO:0097090	presynaptic membrane organization	3/437	12/28891	0.000683089	0.0107136	0.0082202	Ptprd/Lrrtm4/Apoe	3
Inh_DCN	CD_vs_HC	CD up	GO:0099519	dense core granule cytoskeletal transport	3/437	12/28891	0.000683089	0.0107136	0.0082202	Tanc2/Kif1a/Map2	3
Inh_DCN	CD_vs_HC	CD up	GO:1902947	regulation of tau-protein kinase activity	3/437	12/28891	0.000683089	0.0107136	0.0082202	Apoe/Hsp90aa1/Rb1	3
Inh_DCN	CD_vs_HC	CD up	GO:0046883	regulation of hormone secretion	14/437	337/28891	0.000685272	0.0107136	0.0082202	Epha5/Nrg1/Chrm3/Pex5l/Kalrn/Glud1/Pde8b/Htr2c/Stxbp5l/Hmgcr/Cask/Oprk1/Glul/Gja1	14
Inh_DCN	CD_vs_HC	CD up	GO:0098900	regulation of action potential	6/437	71/28891	0.00072307	0.0112566	0.00863685	Ctnna3/Cacna2d1/Kcnip1/Cntnap2/Dlg1/Ank3	6
Inh_DCN	CD_vs_HC	CD up	GO:0090276	regulation of peptide hormone secretion	12/437	264/28891	0.000750647	0.0116366	0.00892842	Epha5/Chrm3/Pex5l/Kalrn/Glud1/Pde8b/Htr2c/Stxbp5l/Hmgcr/Cask/Glul/Gja1	12
Inh_DCN	CD_vs_HC	CD up	GO:0001952	regulation of cell-matrix adhesion	8/437	128/28891	0.000757014	0.0116718	0.00895539	Dlc1/Apod/Nrp1/Dmd/Nexmif/Pik3cb/Pcsk5/Cask	8
Inh_DCN	CD_vs_HC	CD up	GO:0010810	regulation of cell-substrate adhesion	11/437	228/28891	0.000759268	0.0116718	0.00895539	Edil3/Dlc1/Apod/Nrp1/Dmd/Nexmif/Pik3cb/Col26a1/Pcsk5/Cask/Npnt	11
Inh_DCN	CD_vs_HC	CD up	GO:0045197	establishment or maintenance of epithelial cell apical/basal polarity	5/437	48/28891	0.000775991	0.0118298	0.00907667	Pard3/Pard3b/Dlg1/Prickle2/Dlg2	5
Inh_DCN	CD_vs_HC	CD up	GO:0086009	membrane repolarization	5/437	48/28891	0.000775991	0.0118298	0.00907667	Cacna2d1/Kcnh7/Kcnd2/Slc24a4/Gja1	5
Inh_DCN	CD_vs_HC	CD up	GO:0035020	regulation of Rac protein signal transduction	4/437	28/28891	0.000792821	0.0120365	0.00923521	Arhgap24/Rtn4/Pik3cb/Ogt	4
Inh_DCN	CD_vs_HC	CD up	GO:0018209	peptidyl-serine modification	14/437	343/28891	0.000812821	0.012239	0.00939057	Camk2b/Tenm1/Atp2b4/Hsp90aa1/Mapk8/Camk1/Mast4/Dmd/Hsp90ab1/Slc1a1/Ogt/Prkg2/Pkn2/Pde4d	14
Inh_DCN	CD_vs_HC	CD up	GO:1902074	response to salt	14/437	343/28891	0.000812821	0.012239	0.00939057	Pcdh15/Sdk1/Chrm3/Kcnmb2/Atp2b4/Slc25a13/Kcnh1/Nfat5/Oprk1/Syt6/Ncam1/Slc1a1/Ppp2r2a/Dlg2	14
Inh_DCN	CD_vs_HC	CD up	GO:0046579	positive regulation of Ras protein signal transduction	6/437	73/28891	0.000837974	0.0125151	0.00960245	Robo1/Nrg1/Mapre2/Arhgef3/Rtn4/Pik3cb	6
Inh_DCN	CD_vs_HC	CD up	GO:0048168	regulation of neuronal synaptic plasticity	6/437	73/28891	0.000837974	0.0125151	0.00960245	Grik2/Grm5/Camk2b/Neto1/Cpeb1/Rims1	6
Inh_DCN	CD_vs_HC	CD up	GO:1902652	secondary alcohol metabolic process	9/437	162/28891	0.000842843	0.0125181	0.00960478	Cyp51/Apoe/Npc1/Msmo1/Hmgcr/Sqle/Fdft1/Idi1/Fdps	9
Inh_DCN	CD_vs_HC	CD up	GO:0043542	endothelial cell migration	11/437	231/28891	0.000844991	0.0125181	0.00960478	Robo1/Slit2/Apoe/Nrp1/Atp2b4/Hdac9/Ccbe1/Pik3cb/Krit1/Glul/Fgf18	11
Inh_DCN	CD_vs_HC	CD up	GO:0034205	amyloid-beta formation	5/437	49/28891	0.000853565	0.0125944	0.00966327	Lrrtm3/Apoe/Rtn4/Rtn1/Rtn3	5
Inh_DCN	CD_vs_HC	CD up	GO:0043087	regulation of GTPase activity	14/437	345/28891	0.00085956	0.0126321	0.00969222	Epha5/Garnl3/Prkg1/Kalrn/Mapre2/Chn1/Rasgef1b/Arhgap24/Rapgef5/Adap1/Rapgef6/Asap2/Prex2/Rasa3	14
Inh_DCN	CD_vs_HC	CD up	GO:0033157	regulation of intracellular protein transport	11/437	232/28891	0.000875288	0.0126779	0.00972738	Apod/Ube2j1/Hsp90aa1/Camk1/Pcm1/Hsp90ab1/Kif3a/Gcc2/Slc1a1/Ogt/Ank3	11
Inh_DCN	CD_vs_HC	CD up	GO:0050772	positive regulation of axonogenesis	7/437	101/28891	0.000876011	0.0126779	0.00972738	Robo1/Robo2/Apoe/Nrp1/Map1b/Slitrk1/Bcl11a	7
Inh_DCN	CD_vs_HC	CD up	GO:0140059	dendrite arborization	3/437	13/28891	0.000878076	0.0126779	0.00972738	Grip1/Cntnap2/Nrp1	3
Inh_DCN	CD_vs_HC	CD up	GO:1902667	regulation of axon guidance	3/437	13/28891	0.000878076	0.0126779	0.00972738	Slit2/Nrp1/Mycbp2	3
Inh_DCN	CD_vs_HC	CD up	GO:0016125	sterol metabolic process	9/437	163/28891	0.000880439	0.0126779	0.00972738	Cyp51/Apoe/Npc1/Msmo1/Hmgcr/Sqle/Fdft1/Idi1/Fdps	9
Inh_DCN	CD_vs_HC	CD up	GO:0002791	regulation of peptide secretion	12/437	269/28891	0.000883383	0.0126779	0.00972738	Epha5/Chrm3/Pex5l/Kalrn/Glud1/Pde8b/Htr2c/Stxbp5l/Hmgcr/Cask/Glul/Gja1	12
Inh_DCN	CD_vs_HC	CD up	GO:0010996	response to auditory stimulus	4/437	29/28891	0.000908775	0.0128913	0.00989107	Cntnap2/Foxp2/Atp8a2/D130043K22Rik	4
Inh_DCN	CD_vs_HC	CD up	GO:0048634	regulation of muscle organ development	4/437	29/28891	0.000908775	0.0128913	0.00989107	Mrtfb/Hdac9/Cdon/Gja1	4
Inh_DCN	CD_vs_HC	CD up	GO:1901863	positive regulation of muscle tissue development	4/437	29/28891	0.000908775	0.0128913	0.00989107	Mrtfb/Hmgcr/Cdon/Gja1	4
Inh_DCN	CD_vs_HC	CD up	GO:0048259	regulation of receptor-mediated endocytosis	8/437	132/28891	0.000925503	0.0130781	0.0100344	Nrg1/Pard3/Gsg1l/Trf/Bicd1/Kif3a/Dnajc6/Ahi1	8
Inh_DCN	CD_vs_HC	CD up	GO:0007157	heterophilic cell-cell adhesion via plasma membrane cell adhesion molecules	5/437	50/28891	0.000936769	0.0131865	0.0101176	Ptprd/Tenm3/Alcam/Tenm1/Tenm2	5
Inh_DCN	CD_vs_HC	CD up	GO:0090087	regulation of peptide transport	12/437	271/28891	0.000941691	0.0132052	0.010132	Epha5/Chrm3/Pex5l/Kalrn/Glud1/Pde8b/Htr2c/Stxbp5l/Hmgcr/Cask/Glul/Gja1	12
Inh_DCN	CD_vs_HC	CD up	GO:0006898	receptor-mediated endocytosis	12/437	272/28891	0.000972026	0.0135788	0.0104186	Nrg1/Pard3/Gsg1l/Trf/Apoe/Bicd1/Tmem108/Kif3a/Dnm3/Dnajc6/Cd9/Ahi1	12
Inh_DCN	CD_vs_HC	CD up	GO:0003205	cardiac chamber development	10/437	200/28891	0.000995135	0.013849	0.0106259	Robo1/Nrg1/Robo2/Slit2/Col11a1/Slit3/Nrp1/Pcsk5/Tmem65/Cplane1	10
Inh_DCN	CD_vs_HC	CD up	GO:0008340	determination of adult lifespan	5/437	51/28891	0.00102585	0.014152	0.0108584	Hdac9/Dmd/Atp8a2/Scn2a/Meg3	5
Inh_DCN	CD_vs_HC	CD up	GO:0031646	positive regulation of nervous system process	5/437	51/28891	0.00102585	0.014152	0.0108584	Pard3/Cntnap2/Trf/Rims1/Rims2	5
Inh_DCN	CD_vs_HC	CD up	GO:0000380	alternative mRNA splicing, via spliceosome	6/437	76/28891	0.00103613	0.014152	0.0108584	Khdrbs2/Khdrbs3/Celf4/Nova1/Celf2/Rbm5	6
Inh_DCN	CD_vs_HC	CD up	GO:0061003	positive regulation of dendritic spine morphogenesis	4/437	30/28891	0.00103617	0.014152	0.0108584	Camk2b/Kalrn/Lrp8/Cask	4
Inh_DCN	CD_vs_HC	CD up	GO:0072344	rescue of stalled ribosome	4/437	30/28891	0.00103617	0.014152	0.0108584	Ascc3/Rnf25/Tcf25/Klhdc10	4
Inh_DCN	CD_vs_HC	CD up	GO:0007043	cell-cell junction assembly	9/437	168/28891	0.00108942	0.0148242	0.0113741	Cdh18/Pard3/Cntnap2/Cdh10/Dlg1/Cdh8/Cd9/Gja1/Pkn2	9
Inh_DCN	CD_vs_HC	CD up	GO:0021979	hypothalamus cell differentiation	3/437	14/28891	0.00110505	0.0148717	0.0114106	Nrp1/Ubb/Pou3f2	3
Inh_DCN	CD_vs_HC	CD up	GO:0045161	neuronal ion channel clustering	3/437	14/28891	0.00110505	0.0148717	0.0114106	Cntnap2/Dlg2/Ank3	3
Inh_DCN	CD_vs_HC	CD up	GO:0072393	microtubule anchoring at microtubule organizing center	3/437	14/28891	0.00110505	0.0148717	0.0114106	Bicd1/Pcm1/Kif3a	3
Inh_DCN	CD_vs_HC	CD up	GO:0042982	amyloid precursor protein metabolic process	6/437	77/28891	0.00110958	0.0148781	0.0114155	Lrrtm3/Apoe/Dlg1/Rtn4/Rtn1/Rtn3	6
Inh_DCN	CD_vs_HC	CD up	GO:0034605	cellular response to heat	5/437	52/28891	0.00112107	0.0149775	0.0114918	Xylt1/Arpp21/Hsp90aa1/Hsp90ab1/Rasa3	5
Inh_DCN	CD_vs_HC	CD up	GO:0046928	regulation of neurotransmitter secretion	7/437	106/28891	0.00116396	0.0154942	0.0118882	Htr2c/Stxbp5l/Kcnh1/Slc38a2/Cask/Rims1/Rims2	7
Inh_DCN	CD_vs_HC	CD up	GO:0086010	membrane depolarization during action potential	4/437	31/28891	0.00117559	0.0155925	0.0119636	Cacna2d1/Scn3a/Scn2a/Ank3	4
Inh_DCN	CD_vs_HC	CD up	GO:0050795	regulation of behavior	7/437	108/28891	0.00129799	0.0170378	0.0130726	Ptgds/Zfhx3/Slc24a4/Apoe/Oprk1/Ahi1/Gja1	7
Inh_DCN	CD_vs_HC	CD up	GO:0030072	peptide hormone secretion	13/437	321/28891	0.00132315	0.0170378	0.0130726	Epha5/Chrm3/Pex5l/Kalrn/Glud1/Pde8b/Htr2c/Stxbp5l/Hmgcr/Cask/Glul/Gja1/Rims2	13
Inh_DCN	CD_vs_HC	CD up	GO:0007263	nitric oxide mediated signal transduction	4/437	32/28891	0.00132764	0.0170378	0.0130726	Kcnc2/Apoe/Atp2b4/Gucy1a2	4
Inh_DCN	CD_vs_HC	CD up	GO:0007271	synaptic transmission, cholinergic	4/437	32/28891	0.00132764	0.0170378	0.0130726	Chrm3/Camk2b/Htr2c/Nalcn	4
Inh_DCN	CD_vs_HC	CD up	GO:0051654	establishment of mitochondrion localization	4/437	32/28891	0.00132764	0.0170378	0.0130726	Agbl4/Ubb/Uchl1/Map1b	4
Inh_DCN	CD_vs_HC	CD up	GO:1902683	regulation of receptor localization to synapse	4/437	32/28891	0.00132764	0.0170378	0.0130726	Gpc6/Neto2/Kalrn/Ogt	4
Inh_DCN	CD_vs_HC	CD up	GO:0003179	heart valve morphogenesis	5/437	54/28891	0.00133094	0.0170378	0.0130726	Robo1/Robo2/Slit2/Slit3/Rb1	5
Inh_DCN	CD_vs_HC	CD up	GO:0021795	cerebral cortex cell migration	5/437	54/28891	0.00133094	0.0170378	0.0130726	Robo1/Slit2/Lrp8/Pou3f2/Rtn4	5
Inh_DCN	CD_vs_HC	CD up	GO:0035088	establishment or maintenance of apical/basal cell polarity	5/437	54/28891	0.00133094	0.0170378	0.0130726	Pard3/Pard3b/Dlg1/Prickle2/Dlg2	5
Inh_DCN	CD_vs_HC	CD up	GO:0061245	establishment or maintenance of bipolar cell polarity	5/437	54/28891	0.00133094	0.0170378	0.0130726	Pard3/Pard3b/Dlg1/Prickle2/Dlg2	5
Inh_DCN	CD_vs_HC	CD up	GO:0046879	hormone secretion	15/437	403/28891	0.00135484	0.0172297	0.0132199	Epha5/Nrg1/Chrm3/Pex5l/Kalrn/Glud1/Pde8b/Htr2c/Stxbp5l/Hmgcr/Cask/Oprk1/Glul/Gja1/Rims2	15
Inh_DCN	CD_vs_HC	CD up	GO:0045664	regulation of neuron differentiation	11/437	245/28891	0.00135814	0.0172297	0.0132199	Zfhx3/Brinp1/Gprc5b/Alk/Mapk8/Dmd/Rtn4/Cdon/Map1b/Bcl11a/Ttc3	11
Inh_DCN	CD_vs_HC	CD up	GO:0048755	branching morphogenesis of a nerve	3/437	15/28891	0.00136588	0.0172297	0.0132199	Epha7/Rtn4/Bcl11a	3
Inh_DCN	CD_vs_HC	CD up	GO:1903365	regulation of fear response	3/437	15/28891	0.00136588	0.0172297	0.0132199	Apoe/Prkar1b/Gja1	3
Inh_DCN	CD_vs_HC	CD up	GO:0071901	negative regulation of protein serine/threonine kinase activity	7/437	109/28891	0.00136938	0.0172297	0.0132199	Apoe/Uchl1/Prkar1b/Prkar2b/Rb1/Pik3cb/Hmgcr	7
Inh_DCN	CD_vs_HC	CD up	GO:0006936	muscle contraction	13/437	324/28891	0.00143746	0.0180101	0.0138186	Chrm3/Ctnna3/Cacna2d1/Prkg1/Kcnd2/Dlg1/Atp2b4/Dmd/Gaa/Atp8a2/Npnt/Ryr3/Pde4d	13
Inh_DCN	CD_vs_HC	CD up	GO:0006821	chloride transport	7/437	110/28891	0.00144379	0.0180101	0.0138186	Gabrb1/Ano3/Ano4/Ano5/Slc1a1/Glra3/Prkg2	7
Inh_DCN	CD_vs_HC	CD up	GO:0031113	regulation of microtubule polymerization	5/437	55/28891	0.0014461	0.0180101	0.0138186	Nav3/Stmn2/Mapk8/Map1b/Map2	5
Inh_DCN	CD_vs_HC	CD up	GO:0140058	neuron projection arborization	4/437	33/28891	0.00149289	0.01853	0.0142175	Grip1/Cntnap2/Nrp1/Ntng1	4
Inh_DCN	CD_vs_HC	CD up	GO:1904062	regulation of monoatomic cation transmembrane transport	14/437	367/28891	0.00154173	0.0190415	0.0146099	Grip1/Cacna2d1/Kcnip1/Kcnc2/Neto1/Plp1/Dlg1/Klhl24/Atp2b4/Dmd/Oprk1/Fgf14/Pde4d/Ank3	14
Inh_DCN	CD_vs_HC	CD up	GO:1903320	regulation of protein modification by small protein conjugation or removal	11/437	249/28891	0.00154446	0.0190415	0.0146099	Ndfip2/Minar1/Hsp90aa1/Ubb/Mapk8/Prickle1/Tcf25/Wdr48/Ndfip1/Ogt/Mycbp2	11
Inh_DCN	CD_vs_HC	CD up	GO:0051646	mitochondrion localization	5/437	56/28891	0.00156844	0.0192724	0.0147871	Agbl4/Ubb/Uchl1/Map1b/Ogt	5
Inh_DCN	CD_vs_HC	CD up	GO:0046165	alcohol biosynthetic process	8/437	144/28891	0.00161758	0.0197921	0.0151859	Cyp51/Apoe/Msmo1/Hmgcr/Fdft1/Pgp/Idi1/Fdps	8
Inh_DCN	CD_vs_HC	CD up	GO:0051402	neuron apoptotic process	14/437	369/28891	0.00162151	0.0197921	0.0151859	Grm7/Grik2/Ppp2r2b/Apoe/Epha7/Retreg1/Nrp1/Ubb/Mapk8/Rb1/Ptges3/Hsp90ab1/Scn2a/Slc1a1	14
Inh_DCN	CD_vs_HC	CD up	GO:1902904	negative regulation of supramolecular fiber organization	9/437	178/28891	0.00162764	0.0198012	0.0151928	Nav3/Slit2/Dlc1/Apoe/Add2/Stmn2/Ctnna2/Map1b/Map2	9
Inh_DCN	CD_vs_HC	CD up	GO:0009914	hormone transport	15/437	411/28891	0.00164098	0.0198947	0.0152646	Epha5/Nrg1/Chrm3/Pex5l/Kalrn/Glud1/Pde8b/Htr2c/Stxbp5l/Hmgcr/Cask/Oprk1/Glul/Gja1/Rims2	15
Inh_DCN	CD_vs_HC	CD up	GO:0002790	peptide secretion	13/437	329/28891	0.00164616	0.0198947	0.0152646	Epha5/Chrm3/Pex5l/Kalrn/Glud1/Pde8b/Htr2c/Stxbp5l/Hmgcr/Cask/Glul/Gja1/Rims2	13
Inh_DCN	CD_vs_HC	CD up	GO:0032222	regulation of synaptic transmission, cholinergic	3/437	16/28891	0.00166231	0.0199586	0.0153136	Camk2b/Htr2c/Nalcn	3
Inh_DCN	CD_vs_HC	CD up	GO:0045760	positive regulation of action potential	3/437	16/28891	0.00166231	0.0199586	0.0153136	Kcnip1/Cntnap2/Ank3	3
Inh_DCN	CD_vs_HC	CD up	GO:0006694	steroid biosynthetic process	9/437	179/28891	0.00169147	0.0201917	0.0154924	Cyp51/Apoe/Pde8b/Msmo1/Hmgcr/Sqle/Fdft1/Idi1/Fdps	9
Inh_DCN	CD_vs_HC	CD up	GO:0050435	amyloid-beta metabolic process	5/437	57/28891	0.00169821	0.0201917	0.0154924	Lrrtm3/Apoe/Rtn4/Rtn1/Rtn3	5
Inh_DCN	CD_vs_HC	CD up	GO:1901861	regulation of muscle tissue development	5/437	57/28891	0.00169821	0.0201917	0.0154924	Mrtfb/Hdac9/Hmgcr/Cdon/Gja1	5
Inh_DCN	CD_vs_HC	CD up	GO:0007519	skeletal muscle tissue development	10/437	215/28891	0.00170901	0.0202545	0.0155407	Cntnap2/Ephb1/Hdac9/Foxp2/Col19a1/Dmd/Rb1/Hmgcr/Cdon/Meg3	10
Inh_DCN	CD_vs_HC	CD up	GO:0036294	cellular response to decreased oxygen levels	8/437	146/28891	0.00176484	0.0208489	0.0159967	Bmyc/Kcnd2/Rtn4/Pik3cb/Cpeb1/Ddah1/Scn2a/Ogt	8
Inh_DCN	CD_vs_HC	CD up	GO:0050922	negative regulation of chemotaxis	5/437	58/28891	0.00183569	0.0216164	0.0165856	Robo1/Robo2/Slit2/Sema6d/Nrp1	5
Inh_DCN	CD_vs_HC	CD up	GO:0031112	positive regulation of microtubule polymerization or depolymerization	4/437	35/28891	0.00186539	0.0218959	0.0168001	Nav3/Stmn2/Mapk8/Map1b	4
Inh_DCN	CD_vs_HC	CD up	GO:1901873	regulation of post-translational protein modification	12/437	295/28891	0.00192901	0.0225707	0.0173178	Ndfip2/Minar1/Hsp90aa1/Ubb/Mapk8/Prickle1/Tcf25/Wdr48/Ndfip1/Ogt/Kansl1/Mycbp2	12
Inh_DCN	CD_vs_HC	CD up	GO:2000300	regulation of synaptic vesicle exocytosis	5/437	59/28891	0.00198114	0.023107	0.0177293	Stxbp5l/Kcnh1/Cask/Rims1/Rims2	5
Inh_DCN	CD_vs_HC	CD up	GO:0018119	peptidyl-cysteine S-nitrosylation	3/437	17/28891	0.00199599	0.0231334	0.0177495	Atp2b4/Ncoa7/Dmd	3
Inh_DCN	CD_vs_HC	CD up	GO:2000479	regulation of cAMP-dependent protein kinase activity	3/437	17/28891	0.00199599	0.0231334	0.0177495	Atp2b4/Prkar1b/Prkar2b	3
Inh_DCN	CD_vs_HC	CD up	GO:0007026	negative regulation of microtubule depolymerization	4/437	36/28891	0.00207378	0.0238843	0.0183257	Nav3/Stmn2/Map1b/Map2	4
Inh_DCN	CD_vs_HC	CD up	GO:1901889	negative regulation of cell junction assembly	4/437	36/28891	0.00207378	0.0238843	0.0183257	Robo1/Dlc1/Apod/Epha7	4
Inh_DCN	CD_vs_HC	CD up	GO:0008654	phospholipid biosynthetic process	10/437	223/28891	0.00223276	0.0256349	0.0196689	Dgkg/Dpm1/Lpcat2/Htr2c/Agpat4/Pik3cb/Dgkb/Pdgfa/Idi1/Fdps	10
Inh_DCN	CD_vs_HC	CD up	GO:0035924	cellular response to vascular endothelial growth factor stimulus	5/437	61/28891	0.00229702	0.0258214	0.019812	Robo1/Nrp1/Atp2b4/Ccbe1/Pik3cb	5
Inh_DCN	CD_vs_HC	CD up	GO:0042987	amyloid precursor protein catabolic process	5/437	61/28891	0.00229702	0.0258214	0.019812	Lrrtm3/Apoe/Rtn4/Rtn1/Rtn3	5
Inh_DCN	CD_vs_HC	CD up	GO:0001953	negative regulation of cell-matrix adhesion	4/437	37/28891	0.00229771	0.0258214	0.019812	Dlc1/Apod/Nexmif/Cask	4
Inh_DCN	CD_vs_HC	CD up	GO:0048846	axon extension involved in axon guidance	4/437	37/28891	0.00229771	0.0258214	0.019812	Slit2/Slit3/Sema6d/Nrp1	4
Inh_DCN	CD_vs_HC	CD up	GO:0051491	positive regulation of filopodium assembly	4/437	37/28891	0.00229771	0.0258214	0.019812	Tenm1/Nrp1/Rhoq/Dnm3	4
Inh_DCN	CD_vs_HC	CD up	GO:1902284	neuron projection extension involved in neuron projection guidance	4/437	37/28891	0.00229771	0.0258214	0.019812	Slit2/Slit3/Sema6d/Nrp1	4
Inh_DCN	CD_vs_HC	CD up	GO:0050678	regulation of epithelial cell proliferation	15/437	426/28891	0.0023142	0.0258214	0.019812	Robo1/Bmyc/Apoe/Dlg1/Scg2/Foxp2/Rb1/Rtn4/Krit1/Kif3a/Cask/Wdr48/Glul/Fgf18/Gja1	15
Inh_DCN	CD_vs_HC	CD up	GO:0021766	hippocampus development	6/437	89/28891	0.00233772	0.0258214	0.019812	Epha5/Lrp8/Alk/Tmem108/Kif3a/Scn2a	6
Inh_DCN	CD_vs_HC	CD up	GO:1903531	negative regulation of secretion by cell	9/437	188/28891	0.00236091	0.0258214	0.019812	Nrg1/Grm7/Kalrn/Cyp51/Apoe/Pde8b/Stxbp5l/Hmgcr/Oprk1	9
Inh_DCN	CD_vs_HC	CD up	GO:0003231	cardiac ventricle development	8/437	153/28891	0.0023654	0.0258214	0.019812	Robo1/Nrg1/Robo2/Slit2/Col11a1/Slit3/Tmem65/Cplane1	8
Inh_DCN	CD_vs_HC	CD up	GO:0015833	peptide transport	13/437	343/28891	0.00236772	0.0258214	0.019812	Epha5/Chrm3/Pex5l/Kalrn/Glud1/Pde8b/Htr2c/Stxbp5l/Hmgcr/Cask/Glul/Gja1/Rims2	13
Inh_DCN	CD_vs_HC	CD up	GO:0007614	short-term memory	3/437	18/28891	0.00236849	0.0258214	0.019812	Grm7/Ptchd1/Brinp1	3
Inh_DCN	CD_vs_HC	CD up	GO:0070571	negative regulation of neuron projection regeneration	3/437	18/28891	0.00236849	0.0258214	0.019812	Xylt1/Rtn4/D130043K22Rik	3
Inh_DCN	CD_vs_HC	CD up	GO:0098962	regulation of postsynaptic neurotransmitter receptor activity	3/437	18/28891	0.00236849	0.0258214	0.019812	Neto2/Neto1/Dlgap2	3
Inh_DCN	CD_vs_HC	CD up	GO:1900038	negative regulation of cellular response to hypoxia	3/437	18/28891	0.00236849	0.0258214	0.019812	Pik3cb/Ddah1/Ogt	3
Inh_DCN	CD_vs_HC	CD up	GO:1900221	regulation of amyloid-beta clearance	3/437	18/28891	0.00236849	0.0258214	0.019812	Cyp51/Apoe/Hmgcr	3
Inh_DCN	CD_vs_HC	CD up	GO:1905809	negative regulation of synapse organization	3/437	18/28891	0.00236849	0.0258214	0.019812	Robo1/Apoe/Epha7	3
Inh_DCN	CD_vs_HC	CD up	GO:0001667	ameboidal-type cell migration	16/437	471/28891	0.00240223	0.0261118	0.0200348	Robo1/Schip1/Slit2/Sema6d/Apoe/Mapre2/Nrp1/Atp2b4/Hdac9/Ccbe1/Rtn4/Pik3cb/Krit1/Glul/Fgf18/Pkn2	16
Inh_DCN	CD_vs_HC	CD up	GO:0009612	response to mechanical stimulus	9/437	189/28891	0.00244669	0.0265167	0.0203454	Pcdh15/Cntnap2/Ano3/Col11a1/Foxp2/Mapk8/Dmd/Atp8a2/D130043K22Rik	9
Inh_DCN	CD_vs_HC	CD up	GO:0009408	response to heat	6/437	90/28891	0.00247338	0.0266487	0.0204467	Xylt1/Arpp21/Cntnap2/Hsp90aa1/Hsp90ab1/Rasa3	6
Inh_DCN	CD_vs_HC	CD up	GO:0098661	inorganic anion transmembrane transport	6/437	90/28891	0.00247338	0.0266487	0.0204467	Gabrb1/Ano3/Ano4/Ano5/Slc1a1/Glra3	6
Inh_DCN	CD_vs_HC	CD up	GO:0060840	artery development	7/437	121/28891	0.00248809	0.0267288	0.0205082	Robo1/Robo2/Apoe/Nrp1/Prickle1/Rtn4/Gaa	7
Inh_DCN	CD_vs_HC	CD up	GO:0031400	negative regulation of protein modification process	16/437	473/28891	0.00250466	0.0268283	0.0205845	Pard3/Slit2/Apoe/Atp2b4/Minar1/Ncoa7/Uchl1/Prkar1b/Prkar2b/Dmd/Rb1/Pik3cb/Hmgcr/Arpp19/Ogt/Pde4d	16
Inh_DCN	CD_vs_HC	CD up	GO:0060538	skeletal muscle organ development	10/437	227/28891	0.00253921	0.0271194	0.0208079	Cntnap2/Ephb1/Hdac9/Foxp2/Col19a1/Dmd/Rb1/Hmgcr/Cdon/Meg3	10
Inh_DCN	CD_vs_HC	CD up	GO:0072073	kidney epithelium development	8/437	155/28891	0.00256346	0.027299	0.0209456	Robo2/Slit2/Kif26b/Basp1/Epha7/Dlg1/Npnt/Asxl1	8
Inh_DCN	CD_vs_HC	CD up	GO:0042552	myelination	9/437	191/28891	0.00262568	0.0278808	0.0213921	Nrg1/Pard3/Cntnap2/Trf/Plp1/Dlg1/Pou3f2/Mal/Cd9	9
Inh_DCN	CD_vs_HC	CD up	GO:0051058	negative regulation of small GTPase mediated signal transduction	5/437	63/28891	0.00264803	0.0280371	0.021512	Slit2/Dlc1/Arhgap24/Lztr1/Rasa3	5
Inh_DCN	CD_vs_HC	CD up	GO:0050806	positive regulation of synaptic transmission	13/437	348/28891	0.00268121	0.0283068	0.021719	Grik2/Clstn2/Mir124-2hg/Camk2b/Apoe/Htr2c/Prkar1b/Hmgcr/Glul/Nalcn/Slc1a1/Rims1/Rims2	13
Inh_DCN	CD_vs_HC	CD up	GO:0031110	regulation of microtubule polymerization or depolymerization	6/437	92/28891	0.00276235	0.0288393	0.0221275	Nav3/Mapre2/Stmn2/Mapk8/Map1b/Map2	6
Inh_DCN	CD_vs_HC	CD up	GO:0006820	monoatomic anion transport	8/437	157/28891	0.00277425	0.0288393	0.0221275	Grm5/Gabrb1/Ano3/Ano4/Ano5/Slc1a1/Glra3/Prkg2	8
Inh_DCN	CD_vs_HC	CD up	GO:0003184	pulmonary valve morphogenesis	3/437	19/28891	0.00278124	0.0288393	0.0221275	Robo1/Robo2/Slit2	3
Inh_DCN	CD_vs_HC	CD up	GO:0010644	cell communication by electrical coupling	3/437	19/28891	0.00278124	0.0288393	0.0221275	Gja1/Pde4d/Ank3	3
Inh_DCN	CD_vs_HC	CD up	GO:0045793	positive regulation of cell size	3/437	19/28891	0.00278124	0.0288393	0.0221275	Hsp90aa1/Hsp90ab1/Ogt	3
Inh_DCN	CD_vs_HC	CD up	GO:0099504	synaptic vesicle cycle	10/437	230/28891	0.00279046	0.0288393	0.0221275	Pcdh17/Stxbp5l/Kcnh1/Prkar1b/Cask/Dnm3/Dnajc6/Fgf14/Rims1/Rims2	10
Inh_DCN	CD_vs_HC	CD up	GO:0031114	regulation of microtubule depolymerization	4/437	39/28891	0.00279444	0.0288393	0.0221275	Nav3/Stmn2/Map1b/Map2	4
Inh_DCN	CD_vs_HC	CD up	GO:1905606	regulation of presynapse assembly	4/437	39/28891	0.00279444	0.0288393	0.0221275	Nrg1/Lrrtm3/Lrfn5/Slitrk1	4
Inh_DCN	CD_vs_HC	CD up	GO:0035176	social behavior	5/437	64/28891	0.00283739	0.0291189	0.0223421	Cntnap2/Ptchd1/Kalrn/Brinp1/Pcm1	5
Inh_DCN	CD_vs_HC	CD up	GO:0048260	positive regulation of receptor-mediated endocytosis	5/437	64/28891	0.00283739	0.0291189	0.0223421	Pard3/Trf/Bicd1/Kif3a/Ahi1	5
Inh_DCN	CD_vs_HC	CD up	GO:0043534	blood vessel endothelial cell migration	7/437	124/28891	0.0028546	0.0292139	0.0224149	Robo1/Slit2/Apoe/Nrp1/Atp2b4/Hdac9/Fgf18	7
Inh_DCN	CD_vs_HC	CD up	GO:0048167	regulation of synaptic plasticity	14/437	393/28891	0.00287828	0.0293745	0.0225381	Grip1/Grik2/Grm5/Mir124-2hg/Camk2b/Apoe/Neto1/Prkar1b/Hmgcr/Cpeb1/Slc1a1/Fgf14/Rims1/Rims2	14
Inh_DCN	CD_vs_HC	CD up	GO:0007272	ensheathment of neurons	9/437	194/28891	0.00291345	0.0294321	0.0225824	Nrg1/Pard3/Cntnap2/Trf/Plp1/Dlg1/Pou3f2/Mal/Cd9	9
Inh_DCN	CD_vs_HC	CD up	GO:0008366	axon ensheathment	9/437	194/28891	0.00291345	0.0294321	0.0225824	Nrg1/Pard3/Cntnap2/Trf/Plp1/Dlg1/Pou3f2/Mal/Cd9	9
Inh_DCN	CD_vs_HC	CD up	GO:0032273	positive regulation of protein polymerization	6/437	93/28891	0.00291598	0.0294321	0.0225824	Nav3/Tenm1/Dlg1/Hsp90aa1/Mapk8/Map1b	6
Inh_DCN	CD_vs_HC	CD up	GO:0050848	regulation of calcium-mediated signaling	6/437	93/28891	0.00291598	0.0294321	0.0225824	Nrg1/Slc24a4/Atp2b4/Htr2c/Nfat5/Ncam1	6
Inh_DCN	CD_vs_HC	CD up	GO:0003170	heart valve development	5/437	65/28891	0.00303635	0.0305631	0.0234501	Robo1/Robo2/Slit2/Slit3/Rb1	5
Inh_DCN	CD_vs_HC	CD up	GO:0021680	cerebellar Purkinje cell layer development	4/437	40/28891	0.00306836	0.030717	0.0235682	Klhl1/Cntnap2/Sez6l/Foxp2	4
Inh_DCN	CD_vs_HC	CD up	GO:0070570	regulation of neuron projection regeneration	4/437	40/28891	0.00306836	0.030717	0.0235682	Nrg1/Xylt1/Rtn4/D130043K22Rik	4
Inh_DCN	CD_vs_HC	CD up	GO:0051588	regulation of neurotransmitter transport	7/437	126/28891	0.00312099	0.031159	0.0239073	Htr2c/Stxbp5l/Kcnh1/Slc38a2/Cask/Rims1/Rims2	7
Inh_DCN	CD_vs_HC	CD up	GO:0032102	negative regulation of response to external stimulus	16/437	485/28891	0.00319838	0.0318451	0.0244338	Robo1/Robo2/Xylt1/Slit2/Prkg1/Sema6d/Apoe/Nrp1/Rb1/Lrfn5/Ctnna2/Pdgfa/Cask/D130043K22Rik/Cd9/Ndfip1	16
Inh_DCN	CD_vs_HC	CD up	GO:0043405	regulation of MAP kinase activity	9/437	197/28891	0.00322557	0.0320291	0.0245749	Robo1/Tenm1/Apoe/Magi3/Uchl1/Pik3cb/Hmgcr/Pdgfa/Fgf18	9
Inh_DCN	CD_vs_HC	CD up	GO:0043116	negative regulation of vascular permeability	3/437	20/28891	0.00323562	0.0320422	0.024585	Slit2/Apoe/Ddah1	3
Inh_DCN	CD_vs_HC	CD up	GO:0042551	neuron maturation	5/437	66/28891	0.00324517	0.0320504	0.0245913	Cntnap2/Rb1/Bcl11a/Dlg2/Ank3	5
Inh_DCN	CD_vs_HC	CD up	GO:0008299	isoprenoid biosynthetic process	4/437	41/28891	0.00336003	0.0329249	0.0252622	Hmgcr/Fdft1/Idi1/Fdps	4
Inh_DCN	CD_vs_HC	CD up	GO:2000463	positive regulation of excitatory postsynaptic potential	4/437	41/28891	0.00336003	0.0329249	0.0252622	Neto1/Prkar1b/Rims1/Rims2	4
Inh_DCN	CD_vs_HC	CD up	GO:0071453	cellular response to oxygen levels	8/437	162/28891	0.00336059	0.0329249	0.0252622	Bmyc/Kcnd2/Rtn4/Pik3cb/Cpeb1/Ddah1/Scn2a/Ogt	8
Inh_DCN	CD_vs_HC	CD up	GO:0051703	biological process involved in intraspecies interaction between organisms	5/437	67/28891	0.00346413	0.0337592	0.0259024	Cntnap2/Ptchd1/Kalrn/Brinp1/Pcm1	5
Inh_DCN	CD_vs_HC	CD up	GO:0061337	cardiac conduction	5/437	67/28891	0.00346413	0.0337592	0.0259024	Ctnna3/Cacna2d1/Tmem65/Gja1/Pde4d	5
Inh_DCN	CD_vs_HC	CD up	GO:0003279	cardiac septum development	7/437	129/28891	0.00355568	0.0344686	0.0264467	Robo1/Robo2/Slit2/Slit3/Nrp1/Pcsk5/Cplane1	7
Inh_DCN	CD_vs_HC	CD up	GO:0035249	synaptic transmission, glutamatergic	7/437	129/28891	0.00355568	0.0344686	0.0264467	Grm7/Grik2/Grm5/Grik4/Slc38a2/Cdh8/Glul	7
Inh_DCN	CD_vs_HC	CD up	GO:0006644	phospholipid metabolic process	13/437	360/28891	0.00357382	0.0345532	0.0265116	Dgkg/Pitpnc1/Dpm1/Lpcat2/Htr2c/Agpat4/Pik3cb/Dgkb/Fdft1/Pdgfa/Pgp/Idi1/Fdps	13
Inh_DCN	CD_vs_HC	CD up	GO:0048286	lung alveolus development	5/437	68/28891	0.00369351	0.0355235	0.0272561	Foxp2/Ptges3/Pdgfa/Asxl1/Meg3	5
Inh_DCN	CD_vs_HC	CD up	GO:0061045	negative regulation of wound healing	5/437	68/28891	0.00369351	0.0355235	0.0272561	Prkg1/Apoe/Pdgfa/Cask/Cd9	5
Inh_DCN	CD_vs_HC	CD up	GO:0050884	neuromuscular process controlling posture	3/437	21/28891	0.0037329	0.0357153	0.0274032	Cntnap2/Gaa/Atp8a2	3
Inh_DCN	CD_vs_HC	CD up	GO:0071786	endoplasmic reticulum tubular network organization	3/437	21/28891	0.0037329	0.0357153	0.0274032	Rtn4/Rtn1/Rtn3	3
Inh_DCN	CD_vs_HC	CD up	GO:1904951	positive regulation of establishment of protein localization	13/437	362/28891	0.00374368	0.0357254	0.027411	Chrm3/Glud1/Hsp90aa1/Camk1/Pcm1/Cep135/Hsp90ab1/Kif3a/Cask/Glul/Crebrf/Gja1/Ank3	13
Inh_DCN	CD_vs_HC	CD up	GO:0002040	sprouting angiogenesis	7/437	131/28891	0.00387009	0.036836	0.0282632	Robo1/Slit2/Nrp1/Hdac9/Rtn4/Pik3cb/Glul	7
Inh_DCN	CD_vs_HC	CD up	GO:0071868	cellular response to monoamine stimulus	5/437	69/28891	0.00393357	0.0372473	0.0285787	Atp2b4/Htr2c/Alk/Slc1a1/Pde4d	5
Inh_DCN	CD_vs_HC	CD up	GO:0071870	cellular response to catecholamine stimulus	5/437	69/28891	0.00393357	0.0372473	0.0285787	Atp2b4/Htr2c/Alk/Slc1a1/Pde4d	5
Inh_DCN	CD_vs_HC	CD up	GO:0046888	negative regulation of hormone secretion	6/437	99/28891	0.00397551	0.0375476	0.0288092	Nrg1/Kalrn/Pde8b/Stxbp5l/Hmgcr/Oprk1	6
Inh_DCN	CD_vs_HC	CD up	GO:0038084	vascular endothelial growth factor signaling pathway	4/437	43/28891	0.00399883	0.0375747	0.0288299	Robo1/Nrp1/Ccbe1/Pik3cb	4
Inh_DCN	CD_vs_HC	CD up	GO:0099174	regulation of presynapse organization	4/437	43/28891	0.00399883	0.0375747	0.0288299	Nrg1/Lrrtm3/Lrfn5/Slitrk1	4
Inh_DCN	CD_vs_HC	CD up	GO:0051258	protein polymerization	11/437	282/28891	0.0040214	0.0376904	0.0289187	Nav3/Slit2/Tenm1/Add2/Dlg1/Hsp90aa1/Stmn2/Mapk8/Arhgap18/Map1b/Map2	11
Inh_DCN	CD_vs_HC	CD up	GO:0045475	locomotor rhythm	3/437	22/28891	0.00427426	0.0398569	0.030581	Zfhx3/Cntnap2/Kcnd2	3
Inh_DCN	CD_vs_HC	CD up	GO:0071625	vocalization behavior	3/437	22/28891	0.00427426	0.0398569	0.030581	Cntnap2/Brinp1/Foxp2	3
Inh_DCN	CD_vs_HC	CD up	GO:0002021	response to dietary excess	4/437	44/28891	0.004347	0.0400273	0.0307117	Cntnap2/Rasal2/Apoe/Pcsk1n	4
Inh_DCN	CD_vs_HC	CD up	GO:0010543	regulation of platelet activation	4/437	44/28891	0.004347	0.0400273	0.0307117	Prkg1/Apoe/Pdgfa/Cd9	4
Inh_DCN	CD_vs_HC	CD up	GO:0042220	response to cocaine	4/437	44/28891	0.004347	0.0400273	0.0307117	Sdk1/Oprk1/Ncam1/Slc1a1	4
Inh_DCN	CD_vs_HC	CD up	GO:0044331	cell-cell adhesion mediated by cadherin	4/437	44/28891	0.004347	0.0400273	0.0307117	Cdh18/Cdh10/Nexmif/Cdh8	4
Inh_DCN	CD_vs_HC	CD up	GO:0097484	dendrite extension	4/437	44/28891	0.004347	0.0400273	0.0307117	Tmem108/Bcl11a/Rims1/Rims2	4
Inh_DCN	CD_vs_HC	CD up	GO:0030323	respiratory tube development	10/437	246/28891	0.00448583	0.0411713	0.0315895	Foxp2/Ccbe1/Ptges3/Foxp4/Pcsk5/Pdgfa/Fgf18/Asxl1/Cux1/Meg3	10
Inh_DCN	CD_vs_HC	CD up	GO:0016482	cytosolic transport	8/437	170/28891	0.00449365	0.0411713	0.0315895	Tanc2/Mapk8/Snx16/Lamp1/Vti1b/Kif1a/Gcc2/Map2	8
Inh_DCN	CD_vs_HC	CD up	GO:0097106	postsynaptic density organization	4/437	45/28891	0.00471504	0.0429289	0.0329381	Ptprd/Cntnap2/Tmem108/Dlg2	4
Inh_DCN	CD_vs_HC	CD up	GO:0071867	response to monoamine	5/437	72/28891	0.00472055	0.0429289	0.0329381	Atp2b4/Htr2c/Alk/Slc1a1/Pde4d	5
Inh_DCN	CD_vs_HC	CD up	GO:0071869	response to catecholamine	5/437	72/28891	0.00472055	0.0429289	0.0329381	Atp2b4/Htr2c/Alk/Slc1a1/Pde4d	5
Inh_DCN	CD_vs_HC	CD up	GO:0003177	pulmonary valve development	3/437	23/28891	0.0048608	0.0438485	0.0336436	Robo1/Robo2/Slit2	3
Inh_DCN	CD_vs_HC	CD up	GO:0009065	glutamine family amino acid catabolic process	3/437	23/28891	0.0048608	0.0438485	0.0336436	Glud1/Atp2b4/Ddah1	3
Inh_DCN	CD_vs_HC	CD up	GO:1900746	regulation of vascular endothelial growth factor signaling pathway	3/437	23/28891	0.0048608	0.0438485	0.0336436	Robo1/Ccbe1/Pik3cb	3
Inh_DCN	CD_vs_HC	CD up	GO:0050708	regulation of protein secretion	12/437	331/28891	0.0048694	0.0438485	0.0336436	Epha5/Chrm3/Cyp51/Apoe/Glud1/Pde8b/Stxbp5l/Hmgcr/Cask/Glul/Ahi1/Gja1	12
Inh_DCN	CD_vs_HC	CD up	GO:0051048	negative regulation of secretion	9/437	210/28891	0.00489423	0.043902	0.0336847	Nrg1/Grm7/Kalrn/Cyp51/Apoe/Pde8b/Stxbp5l/Hmgcr/Oprk1	9
Inh_DCN	CD_vs_HC	CD up	GO:0022411	cellular component disassembly	15/437	462/28891	0.00489925	0.043902	0.0336847	Nav3/Nrg1/Bmyc/Mapre2/Retreg1/Fyco1/Add2/Ascc3/Cst3/Stmn2/Prickle1/Map1b/Dnajc6/Ogt/Map2	15
Inh_DCN	CD_vs_HC	CD up	GO:0051651	maintenance of location in cell	10/437	250/28891	0.00501575	0.0448367	0.0344018	Apoe/Htr2c/Dmd/Gaa/Fth1/Plcb4/Ryr3/Gja1/Pde4d/Ank3	10
Inh_DCN	CD_vs_HC	CD up	GO:0030195	negative regulation of blood coagulation	4/437	46/28891	0.00510345	0.0455099	0.0349184	Prkg1/Apoe/Pdgfa/Cd9	4
Inh_DCN	CD_vs_HC	CD up	GO:0008277	regulation of G protein-coupled receptor signaling pathway	7/437	138/28891	0.00513873	0.0457135	0.0350746	Grm5/Kctd16/Slc24a4/Camk2b/Bicd1/Atp2b4/Pde4d	7
Inh_DCN	CD_vs_HC	CD up	GO:1903034	regulation of response to wounding	8/437	174/28891	0.00516012	0.045793	0.0351356	Nrg1/Xylt1/Prkg1/Apoe/Pdgfa/Cask/D130043K22Rik/Cd9	8
Inh_DCN	CD_vs_HC	CD up	GO:0014910	regulation of smooth muscle cell migration	6/437	105/28891	0.00529618	0.0467271	0.0358523	Slit2/Prkg1/Sema6d/Pcsk5/Pdgfa/Pde4d	6
Inh_DCN	CD_vs_HC	CD up	GO:0150115	cell-substrate junction organization	6/437	105/28891	0.00529618	0.0467271	0.0358523	Dlc1/Mapre2/Apod/Nrp1/Prickle1/Dst	6
Inh_DCN	CD_vs_HC	CD up	GO:0015800	acidic amino acid transport	5/437	74/28891	0.00530354	0.0467271	0.0358523	Grm7/Slc25a13/Slc38a2/Slc1a1/Gja1	5
Inh_DCN	CD_vs_HC	CD up	GO:0009582	detection of abiotic stimulus	7/437	139/28891	0.00534274	0.0468478	0.0359449	Pcdh15/Grik2/Ano3/Col11a1/Slc24a4/Ephb1/Atp8a2	7
Inh_DCN	CD_vs_HC	CD up	GO:0021782	glial cell development	7/437	139/28891	0.00534274	0.0468478	0.0359449	Nrg1/Pard3/Cntnap2/Plp1/Dmd/Pou3f2/Mal	7
Inh_DCN	CD_vs_HC	CD up	GO:0043547	positive regulation of GTPase activity	10/437	253/28891	0.00544449	0.0474135	0.0363789	Garnl3/Kalrn/Mapre2/Chn1/Rasgef1b/Arhgap24/Rapgef5/Rapgef6/Asap2/Prex2	10
Inh_DCN	CD_vs_HC	CD up	GO:0007413	axonal fasciculation	3/437	24/28891	0.00549355	0.0474135	0.0363789	Nrp1/Rtn4/Ncam1	3
Inh_DCN	CD_vs_HC	CD up	GO:0021889	olfactory bulb interneuron differentiation	3/437	24/28891	0.00549355	0.0474135	0.0363789	Robo1/Robo2/Slit2	3
Inh_DCN	CD_vs_HC	CD up	GO:0060080	inhibitory postsynaptic potential	3/437	24/28891	0.00549355	0.0474135	0.0363789	Grik2/Rims1/Rims2	3
Inh_DCN	CD_vs_HC	CD up	GO:0106030	neuron projection fasciculation	3/437	24/28891	0.00549355	0.0474135	0.0363789	Nrp1/Rtn4/Ncam1	3
Inh_DCN	CD_vs_HC	CD up	GO:0007628	adult walking behavior	4/437	47/28891	0.00551272	0.0474135	0.0363789	Pcdh15/Klhl1/Npc1/Uchl1	4
Inh_DCN	CD_vs_HC	CD up	GO:1900047	negative regulation of hemostasis	4/437	47/28891	0.00551272	0.0474135	0.0363789	Prkg1/Apoe/Pdgfa/Cd9	4
Inh_DCN	CD_vs_HC	CD up	GO:0051494	negative regulation of cytoskeleton organization	8/437	176/28891	0.00552045	0.0474135	0.0363789	Nav3/Slit2/Dlc1/Add2/Stmn2/Ctnna2/Map1b/Map2	8
Inh_DCN	CD_vs_HC	CD up	GO:0031334	positive regulation of protein-containing complex assembly	9/437	214/28891	0.0055234	0.0474135	0.0363789	Nav3/Nrg1/Tenm1/Dlg1/Hsp90aa1/Mapk8/Pcsk5/Map1b/Rims1	9
Inh_DCN	CD_vs_HC	CD up	GO:0009581	detection of external stimulus	7/437	140/28891	0.00555276	0.0475544	0.036487	Pcdh15/Grik2/Ano3/Col11a1/Slc24a4/Ephb1/Atp8a2	7
Inh_DCN	CD_vs_HC	CD up	GO:0043010	camera-type eye development	13/437	380/28891	0.00558615	0.0477291	0.0366211	Tenm3/Nhs/Ephb1/Celf4/Nrp1/Dlg1/Foxp2/Prickle1/Atp8a2/Cdon/Ahi1/Slc1a1/Gja1	13
Inh_DCN	CD_vs_HC	CD up	GO:0006816	calcium ion transport	15/437	469/28891	0.00560517	0.0477393	0.0366289	Cacna2d1/Cacna2d2/Slc24a4/Camk2b/Plp1/Atp2b4/Htr2c/Dmd/Cask/Nalcn/Plcb4/Ryr3/Gja1/Fgf14/Pde4d	15
Inh_DCN	CD_vs_HC	CD up	GO:0043113	receptor clustering	5/437	75/28891	0.00561333	0.0477393	0.0366289	Grik2/Lrrtm4/Apoe/Dlg1/Dlg2	5
Inh_DCN	CD_vs_HC	CD up	GO:0006941	striated muscle contraction	8/437	178/28891	0.00589966	0.0499432	0.0383199	Ctnna3/Cacna2d1/Dlg1/Dmd/Gaa/Atp8a2/Ryr3/Pde4d	8
Inh_DCN	CD_vs_HC	CD up	GO:1901875	positive regulation of post-translational protein modification	8/437	178/28891	0.00589966	0.0499432	0.0383199	Ndfip2/Ubb/Mapk8/Prickle1/Ndfip1/Ogt/Kansl1/Mycbp2	8
Inh_DCN	CD_vs_HC	CD down	GO:0050807	regulation of synapse organization	33/387	309/28891	4.05118e-20	1.53378e-16	1.14798e-16	Ntn1/Syndig1/Shank2/Lrtm1/Prkca/Baiap2/Dlg4/Tiam1/Adgrb1/Clstn1/Ntrk2/Grin1/Shank3/Nlgn1/Flrt3/Mapk14/Ptprt/Flrt2/Clstn3/Cdc42/Lrrn1/Grid2/Frmpd4/Lzts3/Adgrl3/Neurod2/Nedd4/Gpr158/Grid1/Il1rapl1/Adgrb3/Malat1/Nrxn1	33
Inh_DCN	CD_vs_HC	CD down	GO:0050803	regulation of synapse structure or activity	33/387	317/28891	8.95711e-20	1.69558e-16	1.26908e-16	Ntn1/Syndig1/Shank2/Lrtm1/Prkca/Baiap2/Dlg4/Tiam1/Adgrb1/Clstn1/Ntrk2/Grin1/Shank3/Nlgn1/Flrt3/Mapk14/Ptprt/Flrt2/Clstn3/Cdc42/Lrrn1/Grid2/Frmpd4/Lzts3/Adgrl3/Neurod2/Nedd4/Gpr158/Grid1/Il1rapl1/Adgrb3/Malat1/Nrxn1	33
Inh_DCN	CD_vs_HC	CD down	GO:0007416	synapse assembly	28/387	222/28891	3.52841e-19	4.45285e-16	3.3328e-16	Kirrel3/Fgf13/Ntn1/Syndig1/Shank2/Lrtm1/Prkca/Gabrb2/Dlg4/Gabrg2/Gabra1/Adgrb1/Clstn1/Ntrk2/Grin1/Shank3/Nlgn1/Flrt3/Flrt2/Clstn3/Lrrn1/Grid2/Lzts3/Adgrl3/Nptx1/Il1rapl1/Adgrb3/Nrxn1	28
Inh_DCN	CD_vs_HC	CD down	GO:0051962	positive regulation of nervous system development	33/387	391/28891	5.2167e-17	4.01225e-14	3.00302e-14	Ptprz1/Kit/Ntn1/Syndig1/Lrtm1/Vegfa/Prkca/Baiap2/Ppp1cc/Xrcc6/Dlg4/Pak1/Tiam1/Adgrb1/Man2a1/Clstn1/Ntrk2/Shank3/Nlgn1/Flrt3/Pparg/Trpc5/Flrt2/Clstn3/Lrrn1/Grid2/Bcan/Vcan/Adgrl3/Tnik/Il1rapl1/Adgrb3/Nrxn1	33
Inh_DCN	CD_vs_HC	CD down	GO:0035249	synaptic transmission, glutamatergic	21/387	129/28891	5.2988e-17	4.01225e-14	3.00302e-14	Unc13c/Gria3/Shank2/Cnr1/Grm8/Cacng2/Pak1/Grm1/Dgkz/Ntrk2/Grin1/Shank3/Nlgn1/Cacng7/Clstn3/Dgki/Tnr/Grid2/Gria4/Grid1/Nrxn1	21
Inh_DCN	CD_vs_HC	CD down	GO:0007611	learning or memory	30/387	331/28891	2.07781e-16	1.3111e-13	9.81311e-14	Ptprz1/Kit/Fgf13/Shank2/Sorcs3/Cnr1/Prkca/Ndrg4/Pak1/Lamb1/Shank1/Slc6a1/Amph/Dnah11/Plcb1/Ntrk2/Grin1/Shank3/Clstn3/Dgki/Tnr/Nfix/Prrt1/Atp8a1/Csmd1/Atp1a3/Neurod2/Pde5a/Adgrb3/Nrxn1	30
Inh_DCN	CD_vs_HC	CD down	GO:0034329	cell junction assembly	35/387	481/28891	5.63488e-16	2.9897e-13	2.23769e-13	Kirrel3/Fgf13/Ntn1/Syndig1/Shank2/Lrtm1/Vegfa/Prkca/Gabrb2/Smad3/Dlg4/Gabrg2/Fmn1/Gabra1/Adgrb1/Clstn1/Ntrk2/Grin1/Shank3/Nlgn1/Flrt3/Flrt2/Clstn3/Cdc42/Lrrn1/Grid2/Pkp4/Jup/Lzts3/Adgrl3/Nptx1/Il1rapl1/Adgrb3/Ptprk/Nrxn1	35
Inh_DCN	CD_vs_HC	CD down	GO:0050890	cognition	31/387	371/28891	6.31739e-16	2.9897e-13	2.23769e-13	Ptprz1/Kit/Fgf13/Shank2/Sorcs3/Cnr1/Prkca/Ndrg4/Pak1/Lamb1/Shank1/Slc6a1/Amph/Dnah11/Plcb1/Ntrk2/Grin1/Shank3/Clstn3/Dgki/Tnr/Nfix/Prrt1/Atp8a1/Csmd1/Atp1a3/Neurod2/Pde5a/Gpr158/Adgrb3/Nrxn1	31
Inh_DCN	CD_vs_HC	CD down	GO:0051965	positive regulation of synapse assembly	17/387	82/28891	7.43537e-16	3.00258e-13	2.24732e-13	Syndig1/Lrtm1/Prkca/Dlg4/Adgrb1/Clstn1/Ntrk2/Nlgn1/Flrt3/Flrt2/Clstn3/Lrrn1/Grid2/Adgrl3/Il1rapl1/Adgrb3/Nrxn1	17
Inh_DCN	CD_vs_HC	CD down	GO:1901890	positive regulation of cell junction assembly	20/387	129/28891	7.93074e-16	3.00258e-13	2.24732e-13	Syndig1/Lrtm1/Vegfa/Prkca/Smad3/Dlg4/Fmn1/Adgrb1/Clstn1/Ntrk2/Nlgn1/Flrt3/Flrt2/Clstn3/Lrrn1/Grid2/Adgrl3/Il1rapl1/Adgrb3/Nrxn1	20
Inh_DCN	CD_vs_HC	CD down	GO:0051963	regulation of synapse assembly	20/387	144/28891	7.0658e-15	2.43192e-12	1.8202e-12	Ntn1/Syndig1/Lrtm1/Prkca/Dlg4/Adgrb1/Clstn1/Ntrk2/Grin1/Nlgn1/Flrt3/Flrt2/Clstn3/Lrrn1/Grid2/Lzts3/Adgrl3/Il1rapl1/Adgrb3/Nrxn1	20
Inh_DCN	CD_vs_HC	CD down	GO:0007612	learning	22/387	192/28891	1.87015e-14	5.90032e-12	4.41618e-12	Kit/Fgf13/Shank2/Sorcs3/Ndrg4/Pak1/Shank1/Slc6a1/Amph/Ntrk2/Grin1/Shank3/Clstn3/Dgki/Tnr/Nfix/Atp8a1/Csmd1/Atp1a3/Neurod2/Adgrb3/Nrxn1	22
Inh_DCN	CD_vs_HC	CD down	GO:0042391	regulation of membrane potential	33/387	491/28891	3.8213e-14	1.11288e-11	8.3295e-12	Fgf13/Kcna2/Nos1ap/Hcn1/Cnr1/Baiap2/Gabrb2/Cacng2/Cacna1d/Dlg4/Gabrg2/Kcnma1/Shank1/Gabra1/Nos1/Kcna1/Scn8a/Kcnq3/Ntrk2/Grin1/Shank3/Abat/Nlgn1/Atp1b3/Trpc5/Kcnd3/Dgki/Grid2/Atp1a3/Jup/Nedd4/Atp1b1/Nrxn1	33
Inh_DCN	CD_vs_HC	CD down	GO:1901888	regulation of cell junction assembly	23/387	246/28891	3.74415e-13	1.01252e-10	7.57838e-11	Ntn1/Syndig1/Lrtm1/Vegfa/Prkca/Smad3/Dlg4/Fmn1/Adgrb1/Clstn1/Ntrk2/Grin1/Nlgn1/Flrt3/Flrt2/Clstn3/Lrrn1/Grid2/Lzts3/Adgrl3/Il1rapl1/Adgrb3/Nrxn1	23
Inh_DCN	CD_vs_HC	CD down	GO:0099173	postsynapse organization	23/387	252/28891	6.21776e-13	1.56936e-10	1.17461e-10	Shisa6/Shank2/Nos1ap/Cnksr2/Baiap2/Rph3a/Dlg4/Shank1/Dgkz/Tiam1/Adgrb1/Grin1/Shank3/Nlgn1/Cdc42/Grid2/Frmpd4/Lzts3/Adgrl3/Nptx1/Grid1/Il1rapl1/Nrxn1	23
Inh_DCN	CD_vs_HC	CD down	GO:0051966	regulation of synaptic transmission, glutamatergic	15/387	88/28891	7.9977e-13	1.89246e-10	1.41644e-10	Shank2/Cnr1/Grm8/Cacng2/Grm1/Dgkz/Ntrk2/Grin1/Shank3/Nlgn1/Cacng7/Dgki/Tnr/Gria4/Nrxn1	15
Inh_DCN	CD_vs_HC	CD down	GO:0016358	dendrite development	24/387	327/28891	2.06271e-11	4.59377e-09	3.43827e-09	Ptprz1/Dab1/Ntn1/Iqsec1/Fstl4/Fat3/Baiap2/Dlg4/Pak1/Shank1/Tiam1/Camk1d/Ntrk2/Grin1/Shank3/Nlgn1/Trpc5/Cdc42/Hecw1/Lzts3/Tnik/Nedd4/Il1rapl1/Adgrb3	24
Inh_DCN	CD_vs_HC	CD down	GO:0032409	regulation of transporter activity	23/387	307/28891	3.6072e-11	7.58715e-09	5.67871e-09	Fgf13/Shisa6/Cabp1/Hcn1/Prkca/Cacng2/Rph3a/Cacna1d/Dlg4/Shank1/Prkcd/Plcb1/Kcna1/Stac2/Shank3/Nlgn1/Atp1b3/Cacng7/Hecw1/Prrt1/Nedd4/Atp1b1/Nrxn1	23
Inh_DCN	CD_vs_HC	CD down	GO:0032412	regulation of monoatomic ion transmembrane transporter activity	22/387	283/28891	4.74578e-11	9.45659e-09	7.07791e-09	Fgf13/Shisa6/Cabp1/Hcn1/Prkca/Cacng2/Rph3a/Cacna1d/Dlg4/Shank1/Plcb1/Kcna1/Stac2/Shank3/Nlgn1/Atp1b3/Cacng7/Hecw1/Prrt1/Nedd4/Atp1b1/Nrxn1	22
Inh_DCN	CD_vs_HC	CD down	GO:0035418	protein localization to synapse	14/387	100/28891	7.38028e-11	1.39709e-08	1.04567e-08	Baiap2/Cacng2/Dlg4/Shank1/Clstn1/Grin1/Nlgn1/Cacng7/Clstn3/Dlgap1/Tnik/Nptx1/Nbea/Nrxn1	14
Inh_DCN	CD_vs_HC	CD down	GO:0022898	regulation of transmembrane transporter activity	22/387	294/28891	9.91708e-11	1.78791e-08	1.33818e-08	Fgf13/Shisa6/Cabp1/Hcn1/Prkca/Cacng2/Rph3a/Cacna1d/Dlg4/Shank1/Plcb1/Kcna1/Stac2/Shank3/Nlgn1/Atp1b3/Cacng7/Hecw1/Prrt1/Nedd4/Atp1b1/Nrxn1	22
Inh_DCN	CD_vs_HC	CD down	GO:0099601	regulation of neurotransmitter receptor activity	12/387	68/28891	1.04444e-10	1.79738e-08	1.34528e-08	Shisa6/Cacng2/Rph3a/Dlg4/Shank1/Shank3/Nlgn1/Cacng7/Dlgap1/Prrt1/Homer3/Nrxn1	12
Inh_DCN	CD_vs_HC	CD down	GO:0051968	positive regulation of synaptic transmission, glutamatergic	10/387	42/28891	1.66442e-10	2.73978e-08	2.05062e-08	Shank2/Cacng2/Ntrk2/Grin1/Shank3/Nlgn1/Cacng7/Tnr/Gria4/Nrxn1	10
Inh_DCN	CD_vs_HC	CD down	GO:0031346	positive regulation of cell projection organization	27/387	463/28891	2.13153e-10	3.36249e-08	2.51671e-08	Ptprz1/Kit/Ntn1/Vegfa/Cnr1/Baiap2/Trim67/Ndrg4/Dlg4/Pak1/Tiam1/Camk1d/Itpr1/Ntrk2/Grin1/Nlgn1/Acsl6/Trpc5/Ripor2/Cdc42/Pcp4/Kat2b/Rreb1/Auts2/Tnik/Il1rapl1/Nrxn1	27
Inh_DCN	CD_vs_HC	CD down	GO:0060078	regulation of postsynaptic membrane potential	15/387	130/28891	2.56027e-10	3.87727e-08	2.902e-08	Hcn1/Baiap2/Gabrb2/Dlg4/Gabrg2/Shank1/Gabra1/Nos1/Grin1/Shank3/Abat/Nlgn1/Dgki/Grid2/Nrxn1	15
Inh_DCN	CD_vs_HC	CD down	GO:0099565	chemical synaptic transmission, postsynaptic	14/387	117/28891	6.25264e-10	9.10481e-08	6.81462e-08	Baiap2/Gabrb2/Dlg4/Shank1/Grm1/Gabra1/Grin1/Shank3/Abat/Nlgn1/Dgki/Grid2/Anks1b/Nrxn1	14
Inh_DCN	CD_vs_HC	CD down	GO:0050767	regulation of neurogenesis	27/387	494/28891	8.83359e-10	1.23867e-07	9.27096e-08	Ptprz1/Kit/Dab1/Fgf13/Ntn1/Fstl4/Vegfa/Baiap2/Sorl1/Ppp1cc/Dusp10/Xrcc6/Dlg4/Pak1/Sema3e/Tiam1/Nos1/Man2a1/Ntrk2/Shank3/Pparg/Trpc5/Tnr/Bcan/Vcan/Tnik/Il1rapl1	27
Inh_DCN	CD_vs_HC	CD down	GO:2000311	regulation of AMPA receptor activity	8/387	26/28891	1.22044e-09	1.6502e-07	1.23512e-07	Shisa6/Cacng2/Shank1/Shank3/Nlgn1/Cacng7/Prrt1/Nrxn1	8
Inh_DCN	CD_vs_HC	CD down	GO:0034765	regulation of monoatomic ion transmembrane transport	26/387	490/28891	3.38283e-09	4.32762e-07	3.23907e-07	Cacna2d3/Fgf13/Kcna2/Cabp1/Kcnip3/Hcn1/Prkca/Cacng2/Cacna1d/Kcnma1/Plcb1/Nos1/Kcna1/Stac2/Scn8a/Kcnq3/Grin1/Shank3/Atp1b3/Cacng7/Kcnd3/Kcnip4/Kcnc3/Hecw1/Nedd4/Atp1b1	26
Inh_DCN	CD_vs_HC	CD down	GO:1902414	protein localization to cell junction	14/387	133/28891	3.42918e-09	4.32762e-07	3.23907e-07	Baiap2/Cacng2/Dlg4/Shank1/Clstn1/Grin1/Nlgn1/Cacng7/Clstn3/Dlgap1/Tnik/Nptx1/Nbea/Nrxn1	14
Inh_DCN	CD_vs_HC	CD down	GO:0030900	forebrain development	24/387	425/28891	4.13246e-09	5.04693e-07	3.77745e-07	Kirrel3/Dab1/Fgf13/Nfib/Gdpd5/Rarb/Pak1/Lamb1/Sema3e/Plcb1/Kcna1/Tfap2a/Ntrk2/Grin1/Shank3/Zic1/Slc4a10/Tnr/Bcan/Nfix/Prdm8/Bhlhe22/Zbtb18/Fgfr2	24
Inh_DCN	CD_vs_HC	CD down	GO:0048167	regulation of synaptic plasticity	23/387	393/28891	4.47382e-09	5.29309e-07	3.96168e-07	Kit/Unc13c/Shisa6/Shank2/Sorcs3/Baiap2/Dlg4/Prkcg/Mir124a-1hg/Pak1/Nos1/Adgrb1/Kcnq3/Ntrk2/Grin1/Shank3/Nlgn1/Slc4a10/Dgki/Tnr/Grid2/Prrt1/Neurod2	23
Inh_DCN	CD_vs_HC	CD down	GO:0010469	regulation of signaling receptor activity	14/387	139/28891	6.10546e-09	7.00463e-07	5.24271e-07	Shisa6/Cacng2/Rph3a/Dlg4/Zfyve28/Shank1/Shank3/Nlgn1/Pparg/Cacng7/Dlgap1/Prrt1/Homer3/Nrxn1	14
Inh_DCN	CD_vs_HC	CD down	GO:0048813	dendrite morphogenesis	16/387	192/28891	7.95755e-09	8.86096e-07	6.63211e-07	Ptprz1/Baiap2/Dlg4/Shank1/Tiam1/Grin1/Shank3/Nlgn1/Trpc5/Cdc42/Hecw1/Lzts3/Tnik/Nedd4/Il1rapl1/Adgrb3	16
Inh_DCN	CD_vs_HC	CD down	GO:0001505	regulation of neurotransmitter levels	17/387	220/28891	8.46198e-09	9.15344e-07	6.85102e-07	Unc13c/Trim9/Prkca/Grm8/Rph3a/Prkcg/Pak1/Syt2/Slc6a1/Nos1/Ntrk2/Nlgn1/Dgki/Kcnc3/Syn2/Gpr158/Nrxn1	17
Inh_DCN	CD_vs_HC	CD down	GO:0050773	regulation of dendrite development	14/387	145/28891	1.05618e-08	1.11075e-06	8.31357e-07	Ptprz1/Fat3/Baiap2/Dlg4/Tiam1/Camk1d/Ntrk2/Grin1/Trpc5/Hecw1/Tnik/Nedd4/Il1rapl1/Adgrb3	14
[truncated: 3,632 more rows]

## Sheet: S4c
TF	CellType	avg_RAS	RSS_score	statistic_CD_vs_HC	log2FC_CD_vs_HC	wilcox_p_CD_vs_HC	wilcox_padj_CD_vs_HC	statistic_TN_vs_HC	log2FC_TN_vs_HC	wilcox_p_TN_vs_HC	wilcox_padj_TN_vs_HC	statistic_TN_vs_CD	log2FC_TN_vs_CD	wilcox_p_TN_vs_CD	wilcox_padj_TN_vs_CD
[truncated: 266 more rows]
